# Supplementary material for: A column-switching two-dimensional liquid chromatography - high resolution/triple quadrupole dual mass spectrometry system for simultaneously untargeted metabolome and targeted exposome analyses
Source: Research Square preprint supplement (doi:10.21203/rs.3.rs-5820559/v1), 2025-02-03
Supplement: Supplementary file 1 [file 0e6499cdef7f103fe23812e7.xlsx]

## Sheet: Supplementary Data 1
Supplementary Data 1. Internal standards information for 2DLC-HRMS-based matebolomics.
ID	Compound Name	Company	Concentration (μg/mL in methanol)	Fomula	Exact mass	Positive ion mode						Negative ion mode
						ESI mode	Additive ion	m/z	Retention time	RSD in QCs (%)		ESI mode	Additive ion	m/z	Retention time	RSD in QCs (%)
1	Taurine-d4	Toronto Research Chemicals	4.70993	C2H3D4NO3S	129.039	ESI+	[M+H]+	130.047	6.497	7.89191		ESI-	[M-H]-	128.032	6.485	3.87859
2	4-Hydroxyproline-d3	CDN isotopes	5.36306	C5H6D3NO3	134.077	ESI+	[M+H]+	135.084	7.268	5.82405		ESI-	[M-H]-	133.07	7.272	7.64792
3	Ornithine-13C5	Sigma	6.85533	13C5H12N2O2	137.107	ESI+	[M+H]+	138.114	8.61	2.33105		ESI-	[M-H]-	136.099	8.754	8.00721
4	Glutamic acid-d3	Cambridge Isotope Laboratories	3.7518	C5D3H6NO4	150.072	ESI+	[M+H]+	151.079	7.958	3.00046		ESI-	[M-H]-	149.065	8.057	3.90012
5	Lysine-d4	Sigma	7.50653	C6H10D4N2O2	150.131	ESI+	[M+H]+	151.138	8.564	2.5408		ESI-	[M-H]-	149.123	8.714	7.27843
6	Methionine-d3	Sigma	7.60347	C5H8D3NO2S	152.069	ESI+	[M+H]+	153.077	4.971	53.4858		ESI-	[M-H]-	151.063	4.91	44.7886
7	Phenylalanine-d5	Cambridge Isotope Laboratories	4.25276	C9H6D5NO2	170.11	ESI+	[M+H]+	171.118	4.708	8.07378		ESI-	[M-H]-	169.103	4.696	6.75098
8	Tyrosine-d4	Sigma	10.1804	C9H7D4NO3	185.099	ESI+	[M+H]+	186.107	6.417	16.1088		ESI-	[M-H]-	184.092	6.435	5.03734
9	Tryptophan-d5	Sigma	8.36485	C11H7D5N2O2	209.121	ESI+	[M+H]+	210.129	4.715	10.1755		ESI-	[M-H]-	208.114	4.708	7.42784
10	Homocystine-d8	Sigma	8.28314	C8H8D8N2O4S2	276.105	ESI+	[M+H]+	277.113	8.621	3.47998		ESI-	[M-H]-	275.098	8.766	4.66216
11	CDCA-d4	Sigma	1.58527	C24H36D4O4	396.318	ESI+	[M+H]+	361.304	17.936	2.25172		ESI-	[M-H]-	395.31	16.366	2.68623
12	CA-d4	Sigma	1.64925	C24H36D4O5	412.313	ESI+	[M+H]+	377.299	16.914	1.86829		ESI-	[M-H]-	411.305	15.353	3.41905
13	LPE 13:0	Avanti	2.05619	C18H38NO7P	411.238	ESI+	[M+H]+	412.246	3.835	23.9373		ESI-	[M-H]-	410.231	3.879	37.2393
14	Guanosine-13C,15N2	Sigma	1.5	[13C][15N]2C9H13N3O5	286.089	ESI+	[M+H]+	287.097	4.882	3.2103		ESI-	[M-H]-	285.081	4.864	7.72133
15	5-Hydroxy-L-tryptophan-d4	Sigma	10.565	C11H8D4N2O3	224.11	ESI+	[M+H]+	225.118	6.417	2.56627		ESI-	[M-H]-	223.102	6.45	7.88568
16	4-Aminobutyric acid-d6	Sigma	5.45502	C4H3D6NO2	109.1	ESI+	[M+H]+	110.108	4.916	3.16186		-	-	-	-	-
17	Leucine-d3	Sigma	4.69397	C6H10D3NO2	134.113	ESI+	[M+H]+	135.121	4.719	2.15788		-	-	-	-	-
18	NT-methylhistidine-d3	Sigma	2.58155	C7H8D3N3O2	172.103	ESI+	[M+H]+	173.111	7.877	3.34504		-	-	-	-	-
19	Carnitine C2:0-d3	International Laboratory	0.206135	C9H14D3NO4	206.135	ESI+	[M+H]+	207.142	4.671	65.1313		-	-	-	-	-
20	Carnitine C4:0-d3	International Laboratory	0.351248	C11H18D3NO4	234.165	ESI+	[M+H]+	235.173	4.046	12.8487		-	-	-	-	-
21	Carnitine C6:0-d3	International Laboratory	0.262197	C13D3H22NO4	262.197	ESI+	[M+H]+	263.204	3.634	10.4499		-	-	-	-	-
22	Carnitine C10:0-d3	International Laboratory	0.31826	C17H30D3NO4	318.26	ESI+	[M+H]+	319.267	14.964	9.98697		-	-	-	-	-
23	Carnitine C12:0-d3	International Laboratory	0.346291	C19D3H34NO4	346.291	ESI+	[M+H]+	347.298	16.613	10.4606		-	-	-	-	-
24	Carnitine C16:0-d3	International Laboratory	0.402353	C23H42D3NO4	402.353	ESI+	[M+H]+	403.361	19.01	7.87524		-	-	-	-	-
25	LPC 12:0	Avanti	0.87854	C20H42NO7P	439.27	ESI+	[M+H]+	440.278	3.717	32.4191		-	-	-	-	-
26	LPC 19:0	Avanti	3.22428	C27H56NO7P	537.379	ESI+	[M+H]+	538.387	20.481	8.93747		-	-	-	-	-
27	Cer(d18:1/17:0)	Avanti	5.51528	C35H69NO3	551.528	ESI+	[M+H]+	552.536	23.228	19.4845		-	-	-	-	-
28	PE(15:0/15:0)	Avanti	4.17995	C35H70NO8P	663.483	ESI+	[M+H]+	664.491	22.694	7.43273		-	-	-	-	-
29	Hippuric acid-d5	Toronto Research Chemicals	0.8	C9H4D5NO3	184.09	ESI+	[M+H]+	185.097	3.368	28.6606		-	-	-	-	-
30	SM d18:1/12:0	Sigma	9.69757	C35H71N2O6P	646.505	ESI+	[M+H]+	647.513	21.484	4.7673		-	-	-	-	-
31	FFA 16:0-d3	Sigma	3.88889	C16H29D3O2	259.259	-	-	-	-	-		ESI-	[M-H]-	258.252	19.081	10.0031
32	FFA 18:0-d3	CDN isotopes	4.30936	C18H33D3O2	287.29	-	-	-	-	-		ESI-	[M-H]-	286.283	20.04	19.9279
33	Phe-Trp-13C9,15N	Sigma	0.8	[13C]9[15N]C11H21N2O3	361.186	-	-	-	-	-		ESI-	[M-H]-	360.178	4.016	2.41235

## Sheet: Supplementary Data 2
Supplementary Data 2. Internal standards information for 2DLC-HRMS-based chemical residues screening.
ID	Name	Company	Chemical classes	CAS	Concentration (ng/mL in methanol)	Formula	Mass	Retention Time (min)	ESI mode	Ionization type of precursor ion	MRM transition (m/z →m/z)	DP (V)	CE (V)
1	Prometryne-d4	CHIRON	Pesticides	NA	10	C10H15D4N5S	255.224	14.7984	ESI+	[M+H]+	256.2→160.3	100	34
2	Clenbuterol-d9	Sigma	Drugs	129138-58-5	50	C12D9H9Cl2N2O	285.136	12.2384	ESI+	[M+H]+	286.1→204	35	25
3	Metalaxyl-d6	Witega	Pesticides	NA	5	C15H15D6NO4	285.185	13.919	ESI+	[M+H]+	286.2→226.2	55	20
4	Myclobutanil-d9-2	TRC	Pesticides	NA	30	C15H8D9ClN4	297.171	15.1953	ESI+	[M+H]+	298.2→71.1	70	25
5	Coumaphos-d10-3	TRC	Pesticides	287397-86-8	28	C14H6D10ClO5PS	372.078	16.2612	ESI+	[M+H]+	373.1→228	110	40
6	Propazine-d14	CHIRON	Pesticides	1219802-87-5	15	C9H2D14N5Cl	243.197	14.5713	ESI+	[M+H]+	244.2→196.1	55	27
7	2,4-D-D3	CIL	Pesticides	202480-67-9	100	C8H3D3Cl2O3	222.988	12.7232	ESI-	[M-H]-	221.9→163.9	-18	-18
8	Triclosan-13C12	J&K	Pesticides	1365620-36-5	200	[13C]12H7Cl3O2	299.991	17.6487	ESI-	[M-H]-	299→35	-80	-15
9	Perfluorohexanoic acid-13C2	CHIRON	Pollutants	960315-47-3	4	C4[13C]2HF11O2	315.987	13.5696	ESI-	[M-H]-	315→270	-45	-13
10	Sodium Perfluorohexanesulfonate-18O2	CHIRON	Pollutants	1585941-14-5	4	C6HF13O1[18O]2S	403.952	14.517	ESI-	[M-H]-	403→103	-65	-93
11	Perfluorooctanoic acid-1,2,3,4-13C4	CHIRON	Pollutants	960315-48-4	4	C4[13C]4HF15O2	417.987	15.3694	ESI-	[M-H]-	417→372	-30	-15
12	Fipronil-13C2-15N2	TRC	Pesticides	NA	10	C10[13C]2H4Cl2F6N2[15N]2OS	439.939	16.2687	ESI-	[M-H]-	439→334	-95	-24
13	Perfluorononanoic acid-13C5	CHIRON	Pollutants	960315-49-5	4	C4[13C]5HF17O2	468.987	16.214	ESI-	[M-H]-	468→219	-30	-24
14	Sodium Perfluorooctanesulfonate-1,2,3,4-13C4	CHIRON	Pollutants	960315-53-1	4	C4[13C]4HF17O3S	503.951	16.2446	ESI-	[M-H]-	503→99	-115	-76
15	Perfluorodecanoic acid-13C2	CHIRON	Pollutants	960315-50-8	4	C8[13C]2HF19O2	515.974	16.9696	ESI-	[M-H]-	515→470	-30	-16
16	Perfluoroundecanoic acid-13C2	CHIRON	Pollutants	960315-51-9	4	C9[13C]2HF21O2	565.971	17.6463	ESI-	[M-H]-	565→520	-40	-17
17	Sodium Perfluorododecanate-13C2	CHIRON	Pollutants	960315-52-0	4	C10[13C]2HF23O2	615.968	18.2003	ESI-	[M-H]-	615→570	-65	-21

## Sheet: Supplementary Data 3
Supplementary Data 3. Parameters of LC separations of the column-switching 2DLC tandem double MS method.
	Valve position	Pump1&2	Pump3&4 F=0.35 ml/min	Pump5
	0-3.2 min Position. A	0-3.2 min, 90% B1，F=0.15 ml/min	0-9 min, 5% B2	0-3.2 min, F=1 ml/min
1stD	3.2-9 min Position. B	3.2-4.5 min, 90% B1，F=0.4 ml/min 4.5-7 min, 90-70% B1，F=0.4 ml/min 7-8.2 min,70-40% B1，F=0.4 ml/min 8.2-9 min, 40-30% B1，F=0.4 ml/min		F=0
2ndD	9-25 min Position. C	9-10.5 min, 30-90% B1，F=0.4 ml/min 10.5-25 min, 90% B1，F=0.15 ml/min	9-11 min, 5-55% B2 11-20min, 55-100% B2 20-23min, 100% B2 23-23.1min, 100-5% B2 23.1-25min, 5% B2

## Sheet: Supplementary Data 4
Supplementary Data 4. Compound information of the 598 exogenous chemical residues and their optimized LC-MS/MS parameters including retention times, MRM transitions, CE and DP parameters.
ID	Name	Chemical classes	CAS	Formula	Mass	Retention Time	ESI mode	Ionization type of precursor ion	First MRM transition				Second MRM transition
									MRM transition (m/z →m/z)	DP (V)	CE (V)		MRM transition (m/z →m/z)	DP (V)	CE (V)
1	(E)-Dimethomorph	Pesticides-Fungicides	110488-70-5	C21H22ClNO4	387.124	14.9069	ESI+	[M+H]+	388.1→301.1	40	30		388.1→165.1	30	45
2	2,4,5-Trichlorophenoxyacetic acid	Pesticides-Fungicides	93-76-5	C8H5Cl3O3	253.93	13.5086	ESI-	[M-H]-	252.9→194.9	-20	-20		252.9→158.9	-20	-40
3	2,4-Dichlorophenoxyacetic acid	Pesticides-Fungicides	94-75-7	C8H6Cl2O3	219.969	12.7971	ESI-	[M-H]-	219→161	-20	-20		219→125	-20	-35
4	4-Chloro-5-(p-tolyl)-1H-imidazole-2-carbonitrile	Pesticides-Fungicides	120118-14-1	C11H8ClN3	217.041	15.0525	ESI+	[M+H]+	218→183.1	60	30		218→139	50	35
5	Acetochlor	Pesticides-Fungicides	34256-82-1	C14H20ClNO2	269.118	15.4981	ESI+	[M+H]+	270.1→148.1	30	30		270.1→133.1	20	45
6	Alachlor	Pesticides-Fungicides	15972-60-8	C14H20ClNO2	269.118	15.4932	ESI+	[M+H]+	270.1→162.1	20	30		270.1→147.1	30	45
7	Ametoctradin	Pesticides-Fungicides	865318-97-4	C15H25N5	275.211	16.7985	ESI+	[M+H]+	276.2→176	120	51		276.2→149	120	51
8	Azoxystrobin	Pesticides-Fungicides	131860-33-8	C22H17N3O5	403.117	14.3246	ESI+	[M+H]+	404.1→372.1	40	15		404.1→344.1	20	35
9	Benalaxyl	Pesticides-Fungicides	71626-11-4	C20H23NO3	325.168	16.1839	ESI+	[M+H]+	326.2→148.1	30	30		326.2→208.1	40	20
10	Benodanil	Pesticides-Fungicides	15310-01-7	C13H10INO	322.981	13.6127	ESI+	[M+H]+	324→230.9	50	35		324→202.9	50	50
11	Benzovindiflupyr	Pesticides-Fungicides	1072957-71-1	C18H15Cl2F2N3O	397.056	16.7652	ESI-	[M-H]-	396→368	-60	-30		396→131	-60	-35
12	Boscalid	Pesticides-Fungicides	188425-85-6	C18H12Cl2N2O	342.033	14.6911	ESI+	[M+H]+	343→307.1	90	30		343→271.1	50	45
13	Bromuconazole	Pesticides-Fungicides	116255-48-2	C13H12BrCl2N3O	374.954	15.0855	ESI+	[M+H]+	376→159	50	35		376→173	20	35
14	Bupirimate	Pesticides-Fungicides	41483-43-6	C13H24N4O3S	316.157	15.3632	ESI+	[M+H]+	317.2→166.1	50	35		317.2→210.2	70	30
15	Carboxin	Pesticides-Fungicides	5234-68-4	C12H13NO2S	235.067	13.279	ESI+	[M+H]+	236.1→143	30	20		236.1→124	30	30
16	Chlorantraniliprole	Pesticides-Fungicides	500008-45-7	C18H14BrCl2N5O2	480.971	14.3944	ESI-	[M-H]-	480→202	-40	-20		480→144.9	-40	-35
17	Cloquintocet - mexyl	Pesticides-Fungicides	99607-70-2	C18H22ClNO3	335.129	17.6592	ESI+	[M+H]+	336.1→238	30	20		336.1→192	40	40
18	Cyantraniliprole	Pesticides-Fungicides	736994-63-1	C19H14BrClN6O2	472.005	13.467	ESI-	[M-H]-	471→202	-50	-20		471→144.9	-50	-40
19	Cyflufenamid	Pesticides-Fungicides	180409-60-3	C20H17F5N2O2	412.121	16.5392	ESI+	[M+H]+	413.1→295.1	40	20		413.1→241	30	35
20	Cyproconazole	Pesticides-Fungicides	94361-06-5	C15H18ClN3O	291.114	15.2352	ESI+	[M+H]+	292.1→125	50	50		292.1→139	40	35
21	Cyprodinil	Pesticides-Fungicides	121552-61-2	C14H15N3	225.127	15.6264	ESI+	[M+H]+	226.1→108.1	60	35		226.1→119.1	60	40
22	Dazomet	Pesticides-Fungicides	533-74-4	C5H10N2S2	162.029	4.00565	ESI+	[M+H]+	163→117.1	20	40		163→120	20	25
23	Diaveridine	Pesticides-Fungicides	5355-16-8	C13H16N4O2	260.127	3.32775	ESI+	[M+H]+	261.1→245.1	80	35		261.1→123.1	70	30
24	Difenoconazole	Pesticides-Fungicides	119446-68-3	C19H17Cl2N3O3	405.065	16.8202	ESI+	[M+H]+	406.1→251	50	35		406.1→188	50	60
25	Dimethachlor	Pesticides-Fungicides	50563-36-5	C13H18ClNO2	255.103	14.0771	ESI+	[M+H]+	256.1→224.1	20	20		256.1→148.1	30	35
26	Dimethenamid	Pesticides-Fungicides	87674-68-8	C12H18ClNO2S	275.075	14.6301	ESI+	[M+H]+	276.1→244.1	20	20		276.1→168.1	30	35
27	Dimethirimol	Pesticides-Fungicides	5221-53-4	C11H19N3O	209.153	12.9535	ESI+	[M+H]+	210.2→140.1	40	30		210.2→165.1	60	30
28	Dimoxystrobin	Pesticides-Fungicides	149961-52-4	C19H22N2O3	326.163	15.8876	ESI+	[M+H]+	327.2→116	20	50		327.2→223.1	30	30
29	Diniconazole	Pesticides-Fungicides	83657-24-3	C15H17Cl2N3O	325.075	16.7429	ESI+	[M+H]+	326.1→159	70	45		326.1→173	40	40
30	Enestroburin	Pesticides-Fungicides	238410-11-2	C22H22ClNO4	399.124	17.4735	ESI+	[M+H]+	400.1→178	20	20		400.1→137	40	40
31	Enilconazole	Pesticides-Fungicides	35554-44-0	C14H14Cl2N2O	296.048	13.6284	ESI+	[M+H]+	297.1→159	50	35		297.1→255	20	25
32	Epoxiconazole	Pesticides-Fungicides	135319-73-2	C17H13ClFN3O	329.073	15.4134	ESI+	[M+H]+	330.1→121	70	32		330.1→101	70	71
33	Etaconazole	Pesticides-Fungicides	60207-93-4	C14H15Cl2N3O2	327.054	15.4787	ESI+	[M+H]+	328.1→159	40	35		328.1→187	30	30
34	Ethofumesate	Pesticides-Fungicides	26225-79-6	C13H18O5S	286.087	14.448	ESI+	[M+H]+	287.1→121.1	30	20		287.1→161.1	30	30
35	Fenamidone	Pesticides-Fungicides	161326-34-7	C17H17N3OS	311.109	14.6005	ESI+	[M+H]+	312.1→236.1	20	20		312.1→103.1	20	25
36	Fenaminostrobin	Pesticides-Fungicides	366815-39-6	C21H21Cl2N3O3	433.096	17.1594	ESI+	[M+H]+	434.1→171	30	35		434.1→212	30	20
37	Fenarimol	Pesticides-Fungicides	60168-88-9	C17H12Cl2N2O	330.033	15.366	ESI+	[M+H]+	331→268.1	20	35		331→139	90	50
38	Fenbuconazole	Pesticides-Fungicides	114369-43-6	C19H17ClN4	336.114	15.6295	ESI+	[M+H]+	337.1→125	30	60		337.1→163	60	35
39	Fenhexamid	Pesticides-Fungicides	126833-17-8	C14H17Cl2NO2	301.064	15.3116	ESI+	[M+H]+	302.1→97.1	100	30		302.1→55.1	70	60
40	Fenoxanil	Pesticides-Fungicides	115852-48-7	C15H18Cl2N2O2	328.075	15.7791	ESI+	[M+H]+	329.1→189	50	40		329.1→141.1	50	30
41	Fenpropidin	Pesticides-Fungicides	67306-00-7	C19H31N	273.246	14.2354	ESI+	[M+H]+	274.3→147.1	60	40		274.3→132.1	70	55
42	Fenpropimorph	Pesticides-Fungicides	67564-91-4	C20H33NO	303.256	14.4748	ESI+	[M+H]+	304.3→147.1	80	40		304.3→130.1	90	35
43	Fenpyrazamine	Pesticides-Fungicides	473798-59-3	C17H21N3O2S	331.135	15.0272	ESI+	[M+H]+	332.1→230.1	30	25		332.1→216.1	40	35
44	Fluazifop-butyl	Pesticides-Fungicides	69806-50-4	C19H20F3NO4	383.134	17.4205	ESI+	[M+H]+	384.1→282.1	50	30		384.1→254.1	60	40
45	Flumorph	Pesticides-Fungicides	211867-47-9	C21H22FNO4	371.153	14.009	ESI+	[M+H]+	372.2→285.1	140	25		372.2→165.1	50	45
46	Fluopicolide	Pesticides-Fungicides	239110-15-7	C14H8Cl3F3N2O	381.965	14.8649	ESI+	[M+H]+	383→173	30	30		383→145	30	75
47	Fluopyram	Pesticides-Fungicides	658066-35-4	C16H11ClF6N2O	396.046	15.2268	ESI+	[M+H]+	397.1→173	30	35		397.1→208	20	30
48	Flusilazole	Pesticides-Fungicides	85509-19-9	C16H15F2N3Si	315.1	15.7547	ESI+	[M+H]+	316.1→165.1	30	35		316.1→219	30	45
49	Flusulfamide	Pesticides-Fungicides	106917-52-6	C13H7Cl2F3N2O4S	413.946	15.8208	ESI-	[M-H]-	412.9→171	-20	-50		412.9→349	-20	-35
50	Flutolanil	Pesticides-Fungicides	66332-96-5	C17H16F3NO2	323.113	14.8063	ESI+	[M+H]+	324.1→242.1	30	35		324.1→262.1	40	25
51	Flutriafol	Pesticides-Fungicides	76674-21-0	C16H13F2N3O	301.103	13.673	ESI+	[M+H]+	302.1→123	50	35		302.1→109	50	45
52	Fluxapyroxad	Pesticides-Fungicides	907204-31-3	C18H12F5N3O	381.09	15.3044	ESI-	[M-H]-	380.1→248	-50	-30		380.1→131	-50	-30
53	Furalaxyl	Pesticides-Fungicides	57646-30-7	C17H19NO4	301.131	14.4172	ESI+	[M+H]+	302.1→242.1	20	20		302.1→215.1	20	30
54	Furmecyclox	Pesticides-Fungicides	60568-05-0	C14H21NO3	251.152	16.0859	ESI+	[M+H]+	252.2→170.1	30	20		252.2→110.1	30	30
55	Griseofulvin	Pesticides-Fungicides	126-07-8	C17H17ClO6	352.071	13.5738	ESI+	[M+H]+	353.1→165.1	40	30		353.1→215	60	30
56	Haloxyfop-P-methyl	Pesticides-Fungicides	72619-32-0	C16H13ClF3NO4	375.049	16.8805	ESI+	[M+H]+	376.1→316	80	25		376.1→288	50	35
57	Hexaconazole	Pesticides-Fungicides	79983-71-4	C14H17Cl2N3O	313.075	16.4537	ESI+	[M+H]+	314.1→159	30	40		314.1→125	30	50
58	Imibenconazole	Pesticides-Fungicides	86598-92-7	C17H13Cl3N4S	409.993	17.771	ESI+	[M+H]+	411→125	20	55		411→171	90	25
59	Ipconazole	Pesticides-Fungicides	125225-28-7	C18H24ClN3O	333.161	17.0739	ESI+	[M+H]+	334.2→125	40	60		334.2→191.1	50	30
60	Isopyrazam	Pesticides-Fungicides	881685-58-1	C20H23F2N3O	359.181	16.854	ESI+	[M+H]+	360.2→244.1	70	35		360.2→320.2	40	30
61	Mandipropamid	Pesticides-Fungicides	374726-62-2	C23H22ClNO4	411.124	14.695	ESI+	[M+H]+	412.1→328.1	40	20		412.1→125	50	50
62	Mepanipyrim	Pesticides-Fungicides	110235-47-7	C14H13N3	223.111	15.1714	ESI+	[M+H]+	224.1→106.1	30	35		224.1→131.1	40	35
63	Mepronil	Pesticides-Fungicides	55814-41-0	C17H19NO2	269.142	14.8474	ESI+	[M+H]+	270.1→119	50	35		270.1→136	50	25
64	Metalaxyl	Pesticides-Fungicides	57837-19-1	C15H21NO4	279.147	13.8225	ESI+	[M+H]+	280.2→160.1	30	35		280.2→192.1	30	25
65	Metconazole	Pesticides-Fungicides	125116-23-6	C17H22ClN3O	319.145	16.4571	ESI+	[M+H]+	320.2→125	60	60		320.2→177	30	30
66	Methfuroxam	Pesticides-Fungicides	28730-17-8	C14H15NO2	229.11	14.1056	ESI+	[M+H]+	230.1→137.1	40	30		230.1→111.1	40	20
67	Metominostrobin	Pesticides-Fungicides	133408-50-1	C16H16N2O3	284.116	13.9904	ESI+	[M+H]+	285.1→194.1	50	30		285.1→166.1	30	45
68	Metrafenone	Pesticides-Fungicides	220899-03-6	C19H21BrO5	408.057	16.5851	ESI+	[M+H]+	409.1→209.1	30	20		409.1→227	40	30
69	Moroxydine	Pesticides-Fungicides	3160-91-6	C6H13N5O	171.112	4.2277	ESI+	[M+H]+	172.1→60.1	50	20		172.1→113.1	30	30
70	Myclobutanil	Pesticides-Fungicides	88671-89-0	C15H17ClN4	288.114	15.0299	ESI+	[M+H]+	289.1→125	60	45		289.1→151	40	35
71	Ofurace	Pesticides-Fungicides	58810-48-3	C14H16ClNO3	281.082	13.0609	ESI+	[M+H]+	282.1→160.1	30	35		282.1→148.1	40	35
72	Oxadixyl	Pesticides-Fungicides	77732-09-3	C14H18N2O4	278.127	12.7407	ESI+	[M+H]+	279.1→132.1	30	40		279.1→117.1	20	70
73	Penconazole	Pesticides-Fungicides	66246-88-6	C13H15Cl2N3	283.064	16.1056	ESI+	[M+H]+	284.1→159	30	45		284.1→123	30	70
74	Penflufen	Pesticides-Fungicides	494793-67-8	C18H24FN3O	317.19	16.0016	ESI+	[M+H]+	318.2→141	40	35		318.2→234.1	110	20
75	Penthiopyrad	Pesticides-Fungicides	183675-82-3	C16H20F3N3OS	359.128	16.1373	ESI+	[M+H]+	360.1→177	30	50		360.1→256	60	30
76	Phenamacril	Pesticides-Fungicides	39491-78-6	C12H12N2O2	216.09	12.8756	ESI+	[M+H]+	217.1→104	30	35		217.1→146.1	20	25
77	Pretilachlor	Pesticides-Fungicides	51218-49-6	C17H26ClNO2	311.165	17.0966	ESI+	[M+H]+	312.2→252.1	20	25		312.2→176.1	30	40
78	Prochloraz desimidazole-formylamino	Pesticides-Fungicides	139542-32-8	C13H15Cl3N2O3	352.015	16.3699	ESI+	[M+H]+	353→308	30	20		353→222.9	30	35
79	Prochloraz-desimidazole-amino	Pesticides-Fungicides	139520-94-8	C12H15Cl3N2O2	324.02	16.4978	ESI+	[M+H]+	325→282	30	25		325→129.1	40	25
80	Propiconazole	Pesticides-Fungicides	60207-90-1	C15H17Cl2N3O2	341.07	16.3142	ESI+	[M+H]+	342.1→159	50	35		342.1→187	60	30
81	Propisochlor	Pesticides-Fungicides	86763-47-5	C15H22ClNO2	283.134	15.5796	ESI+	[M+H]+	284.1→133.1	30	50		284.1→119.1	30	55
82	Proquinazid	Pesticides-Fungicides	189278-12-4	C14H17IN2O2	372.033	18.5557	ESI+	[M+H]+	373→288.9	20	35		373→331	20	20
83	Pyraclostrobin	Pesticides-Fungicides	175013-18-0	C19H18ClN3O4	387.099	16.3989	ESI+	[M+H]+	388.1→163.1	30	40		388.1→133.1	20	50
84	Pyridaben	Pesticides-Fungicides	96489-71-3	C19H25ClN2OS	364.138	18.8701	ESI+	[M+H]+	365.1→309.1	30	20		365.1→147.1	40	40
85	Pyrimethanil	Pesticides-Fungicides	53112-28-0	C12H13N3	199.111	14.324	ESI+	[M+H]+	200.1→107.1	90	35		200.1→183.1	60	35
86	Pyrimorph	Pesticides-Fungicides	868390-90-3	C22H25ClN2O2	384.16	16.3603	ESI+	[M+H]+	385.2→242	20	35		385.2→272.1	120	45
87	Pyrisoxazole	Pesticides-Fungicides	847749-37-5	C16H17ClN2O	288.103	14.0389	ESI+	[M+H]+	289.1→151.1	40	20		289.1→120	30	30
88	Pyroquilon	Pesticides-Fungicides	57369-32-1	C11H11NO	173.084	13.0779	ESI+	[M+H]+	174.1→117.1	70	45		174.1→132.1	40	30
89	Quinoxyfen	Pesticides-Fungicides	124495-18-7	C15H8Cl2FNO	306.997	17.8997	ESI+	[M+H]+	308→197	50	45		308→214	30	50
90	Quizalofop-ethyl	Pesticides-Fungicides	76578-14-8	C19H17ClN2O4	372.088	17.2877	ESI+	[M+H]+	373.1→299.1	30	25		373.1→271.1	30	35
91	Rabenzazole	Pesticides-Fungicides	40341-04-6	C12H12N4	212.106	13.7507	ESI+	[M+H]+	213.1→172.1	40	30		213.1→145.1	30	40
92	Sedaxane	Pesticides-Fungicides	874967-67-6	C18H19F2N3O	331.15	15.1156	ESI+	[M+H]+	332.2→159	50	30		332.2→263.1	60	35
93	Silthiofam	Pesticides-Fungicides	175217-20-6	C13H21NOSSi	267.111	15.9131	ESI+	[M+H]+	268.1→139	50	30		268.1→194	20	40
94	Simeconazole	Pesticides-Fungicides	149508-90-7	C14H20FN3OSi	293.136	15.4354	ESI+	[M+H]+	294.1→135.1	60	30		294.1→115.1	40	60
95	S-Metolachlor	Pesticides-Fungicides	87392-12-9	C15H22ClNO2	283.134	15.583	ESI+	[M+H]+	284.1→176.1	20	35		284.1→252.1	60	15
96	Tebuconazole	Pesticides-Fungicides	107534-96-3	C16H22ClN3O	307.145	16.1292	ESI+	[M+H]+	308.2→125	60	50		308.2→151	80	35
97	Tebufenpyrad	Pesticides-Fungicides	119168-77-3	C18H24ClN3O	333.161	17.5453	ESI+	[M+H]+	334.2→145.1	120	35		334.2→117	40	60
98	Thifluzamide	Pesticides-Fungicides	130000-40-7	C13H6Br2F6N2O2S	525.842	15.9556	ESI-	[M-H]-	524.8→125	-30	-70		524.8→166	-30	-30
99	Tolfenpyrad	Pesticides-Fungicides	129558-76-5	C21H22ClN3O2	383.14	17.6768	ESI+	[M+H]+	384.1→197.1	70	35		384.1→145.1	70	35
100	Triadimefon	Pesticides-Fungicides	43121-43-3	C14H16ClN3O2	293.093	14.9774	ESI+	[M+H]+	294.1→141	40	30		294.1→129	30	30
101	Trifloxystrobin	Pesticides-Fungicides	141517-21-7	C20H19F3N2O4	408.13	17.0241	ESI+	[M+H]+	409.1→145	30	65		409.1→116	30	40
102	Triflumizole-amino	Pesticides-Fungicides	131549-75-2	C12H14ClF3N2O	294.075	12.9777	ESI+	[M+H]+	295.1→215	50	35		295.1→195	50	40
103	(4-Chloro-2-methylphenoxy)acetic acid	Pesticides-Fungicides	94-74-6	C9H9ClO3	200.024	12.7921	ESI-	[M-H]-	199→141	-20	-20		-	-	-
104	2,6-Dichlorobenzamide	Pesticides-Fungicides	2008-58-4	C7H5Cl2NO	188.975	12.6482	ESI+	[M+H]+	190→109	40	50		-	-	-
105	Carbendazim	Pesticides-Fungicides	10605-21-7	C9H9N3O2	191.069	13.8336	ESI+	[M+H]+	192.1→160.1	100	20		-	-	-
106	Chlorothalonil	Pesticides-Fungicides	1897-45-6	C8Cl4N2	263.882	14.7519	ESI-	[M-H]-	262.9→34.9	-60	-52		-	-	-
107	Dodine	Pesticides-Fungicides	2439-10-3	C13H29N3	227.236	16.7999	ESI+	[M+H]+	228.2→186.2	60	25		-	-	-
108	Fenfuram	Pesticides-Fungicides	24691-80-3	C12H11NO2	201.079	13.3333	ESI+	[M+H]+	202.1→109	40	35		-	-	-
109	Fenoprop	Pesticides-Fungicides	93-72-1	C9H7Cl3O3	267.946	14.0579	ESI-	[M-H]-	266.9→194.9	-20	-20		-	-	-
110	Fluconazole	Pesticides-Fungicides	86386-73-4	C13H12F2N6O	306.104	12.3743	ESI-	[M-H]-	305.1→191.1	-30	-15		-	-	-
111	MCPB	Pesticides-Fungicides	94-81-5	C11H13ClO3	228.055	13.7377	ESI-	[M-H]-	227→141	-40	-25		-	-	-
112	Mecoprop	Pesticides-Fungicides	93-65-2	C10H11ClO3	214.04	13.1713	ESI-	[M-H]-	213→141	-20	-20		-	-	-
113	Monalide	Pesticides-Fungicides	7287-36-7	C13H18ClNO	239.108	15.9956	ESI-	[M-H]-	238.1→126	-50	-30		-	-	-
114	N,N-Dimethyl-N'-p-tolylsulphamide	Pesticides-Fungicides	66840-71-9	C9H14N2O2S	214.078	13.1841	ESI+	[M+H]+	215.1→106.1	30	20		-	-	-
115	Propanil	Pesticides-Fungicides	709-98-8	C9H9Cl2NO	217.006	14.5783	ESI+	[M+H]+	218→127	140	25		-	-	-
116	Triclosan	Pesticides-Fungicides	3380-34-5	C12H7Cl3O2	287.951	17.7031	ESI-	[M-H]-	286.9→35	-20	-38		-	-	-
117	Fludioxonil	Pesticides-Fungicides	131341-86-1	C12H6F2N2O2	248.04	15.0911	ESI-	[M-H]-	247→126	-40	-40		-	-	-
118	Acifluorfen	Pesticides-Herbicides	50594-66-6	C14H7ClF3NO5	360.996	14.3615	ESI-	[M-H]-	360→195	-40	-40		360→222	-30	-35
119	Alloxydim sodium	Pesticides-Herbicides	55635-13-7	C17H24NNaO5	345.155	15.748	ESI+	[M+H]+	346.2→246.1	20	30		346.2→274.1	40	30
120	Amidosulfuron	Pesticides-Herbicides	120923-37-7	C9H15N5O7S2	369.041	13.2694	ESI+	[M+H]+	370→218	20	35		370→139	40	50
121	Atraton	Pesticides-Herbicides	1610-17-9	C9H17N5O	211.143	13.1124	ESI+	[M+H]+	212.2→68	97	57		212.2→100.1	97	39
122	Atrazine	Pesticides-Herbicides	1912-24-9	C8H14ClN5	215.094	13.7889	ESI+	[M+H]+	216.1→174	70	26		216.1→104	70	41
123	Aziprotryne	Pesticides-Herbicides	4658-28-0	C7H11N7S	225.08	14.8711	ESI+	[M+H]+	226.1→156	30	20		226.1→114	30	30
124	Bensulfuron methyl	Pesticides-Herbicides	83055-99-6	C16H18N4O7S	410.09	14.0907	ESI+	[M+H]+	411.1→149.1	30	30		411.1→182.1	50	25
125	Bentazone	Pesticides-Herbicides	25057-89-0	C10H12N2O3S	240.057	11.9906	ESI-	[M-H]-	239→132	-30	-35		239→197	-20	-25
126	Benzofenap	Pesticides-Herbicides	82692-44-2	C22H20Cl2N2O3	430.085	17.1762	ESI+	[M+H]+	431.1→105.1	60	60		431.1→119	40	30
127	Butralin	Pesticides-Herbicides	33629-47-9	C14H21N3O4	295.153	18.3159	ESI+	[M+H]+	296.2→240.1	20	20		296.2→222.1	20	30
128	Buturon	Pesticides-Herbicides	3766-60-7	C12H13ClN2O	236.072	13.8094	ESI+	[M+H]+	237.1→126	30	40		237.1→167	20	30
129	Chlorbenzuron	Pesticides-Herbicides	57160-47-1	C14H10Cl2N2O2	308.012	15.9828	ESI+	[M+H]+	309→156	30	20		309→139	30	45
130	Chlorbromuron	Pesticides-Herbicides	13360-45-7	C9H10BrClN2O2	291.961	14.6769	ESI+	[M+H]+	293→203.9	30	25		293→125	40	50
131	Chlorimuron-ethyl	Pesticides-Herbicides	90982-32-4	C15H15ClN4O6S	414.04	14.7215	ESI+	[M+H]+	415→186	40	30		415→121	50	55
132	Chlorotoluron	Pesticides-Herbicides	15545-48-9	C10H13ClN2O	212.072	13.6097	ESI+	[M+H]+	213.1→140	30	35		213.1→104	40	45
133	Chloroxuron	Pesticides-Herbicides	1982-47-4	C15H15ClN2O2	290.082	15.6179	ESI-	[M-H]-	289.1→134	-70	-40		289.1→120	-50	-45
134	Chlorsulfuron	Pesticides-Herbicides	64902-72-3	C12H12ClN5O4S	357.03	13.1623	ESI+	[M+H]+	358→141.1	30	30		358→167.1	50	25
135	Cinosulfuron	Pesticides-Herbicides	94593-91-6	C15H19N5O7S	413.101	12.6791	ESI+	[M+H]+	414.1→183.1	50	25		414.1→157.1	50	30
136	Clethodim	Pesticides-Herbicides	99129-21-2	C17H26ClNO3S	359.132	17.107	ESI+	[M+H]+	360.1→164.1	50	25		360.1→136.1	40	45
137	Clethodim Sulfone	Pesticides-Herbicides	111031-17-5	C17H26ClNO5S	391.122	13.9968	ESI+	[M+H]+	392.1→164.1	30	35		392.1→208.1	40	30
138	Clethodim Sulfoxide	Pesticides-Herbicides	111031-14-2	C17H26ClNO4S	375.127	14.0859	ESI+	[M+H]+	376.1→206.1	50	25		376.1→164.1	20	30
139	Clomeprop	Pesticides-Herbicides	84496-56-0	C16H15Cl2NO2	323.048	18.1571	ESI-	[M-H]-	322→175	-20	-25		322→139	-20	-50
140	Cloransulam-methyl	Pesticides-Herbicides	147150-35-4	C15H13ClFN5O5S	429.031	13.1574	ESI+	[M+H]+	430→370	40	30		430→306	30	40
141	Cumyluron	Pesticides-Herbicides	99485-76-4	C17H19ClN2O	302.119	15.0448	ESI+	[M+H]+	303.1→185	20	20		303.1→125	20	50
142	Cyanazine	Pesticides-Herbicides	21725-46-2	C9H13ClN6	240.089	12.8591	ESI+	[M+H]+	241.1→214.1	20	25		241.1→104	60	40
143	Cycloxydim	Pesticides-Herbicides	101205-02-1	C17H27NO3S	325.171	16.9768	ESI+	[M+H]+	326.2→180.1	30	30		326.2→101	40	25
144	Cyprazine	Pesticides-Herbicides	22936-86-3	C9H14ClN5	227.094	13.8318	ESI+	[M+H]+	228.1→186.1	60	25		228.1→108.1	60	35
145	Cyromazine	Pesticides-Herbicides	66215-27-8	C6H10N6	166.097	3.32593	ESI+	[M+H]+	167.1→85.1	30	25		167.1→125.1	70	25
146	Desethylsebutylazine	Pesticides-Herbicides	37019-18-4	C7H12ClN5	201.078	13.0764	ESI+	[M+H]+	202.1→146	50	25		202.1→104	20	40
147	Desmethyl Norflurazon	Pesticides-Herbicides	23576-24-1	C11H7ClF3N3O	289.023	13.5532	ESI+	[M+H]+	290→270	90	35		290→179.1	90	45
148	Desmetryn	Pesticides-Herbicides	1014-69-3	C8H15N5S	213.105	13.4082	ESI+	[M+H]+	214.1→172.1	110	20		214.1→124.1	50	30
149	Dichlorprop	Pesticides-Herbicides	120-36-5	C9H8Cl2O3	233.985	13.2251	ESI-	[M-H]-	233→161	-20	-15		233→125	-20	-40
150	Diflufenican	Pesticides-Herbicides	83164-33-4	C19H11F5N2O2	394.074	16.9716	ESI+	[M+H]+	395.1→266	60	35		395.1→238	30	55
151	Dimefuron	Pesticides-Herbicides	34205-21-5	C15H19ClN4O3	338.115	14.4948	ESI-	[M-H]-	337.1→165	-50	-30		337.1→166	-50	-30
152	Dimethametryn	Pesticides-Herbicides	22936-75-0	C11H21N5S	255.152	15.4974	ESI+	[M+H]+	256.2→186.1	110	35		256.2→116	80	40
153	Dinoterb	Pesticides-Herbicides	1420-07-1	C10H12N2O5	240.075	13.6591	ESI-	[M-H]-	239.1→207	-60	-35		239.1→176	-70	-50
154	Diphenamid	Pesticides-Herbicides	957-51-7	C16H17NO	239.131	14.0644	ESI+	[M+H]+	240.1→134.1	80	30		240.1→167.1	50	35
155	Diuron	Pesticides-Herbicides	330-54-1	C9H10Cl2N2O	232.017	13.9344	ESI+	[M+H]+	233→72	60	25		233→160.2	60	29
156	Ethametsulfuron-methyl	Pesticides-Herbicides	97780-06-8	C15H18N6O6S	410.101	13.2375	ESI+	[M+H]+	411.1→196.1	30	20		411.1→168.1	50	45
157	Etobenzanid	Pesticides-Herbicides	79540-50-4	C16H15Cl2NO3	339.043	16.1334	ESI+	[M+H]+	340.1→179.1	70	25		340.1→149.1	30	30
158	Florasulam	Pesticides-Herbicides	145701-23-1	C12H8F3N5O3S	359.03	12.5166	ESI+	[M+H]+	360→129	50	30		360→144	50	35
159	Fluometuron	Pesticides-Herbicides	2164-17-2	C10H11F3N2O	232.082	13.7404	ESI-	[M-H]-	231.1→186	-20	-25		231.1→166	-40	-30
160	Fluridone	Pesticides-Herbicides	59756-60-4	C19H14F3NO	329.103	14.1323	ESI+	[M+H]+	330.1→310.1	80	40		330.1→290.1	20	45
161	Flurprimidol	Pesticides-Herbicides	56425-91-3	C15H15F3N2O2	312.109	14.9355	ESI+	[M+H]+	313.1→270.1	30	35		313.1→189	60	70
162	Flurtamone	Pesticides-Herbicides	96525-23-4	C18H14F3NO2	333.098	14.4541	ESI+	[M+H]+	334.1→247.1	50	35		334.1→178.1	60	65
163	Fluthiacet-methyl	Pesticides-Herbicides	117337-19-6	C15H15ClFN3O3S2	403.023	14.302	ESI+	[M+H]+	404→273	30	55		404→344	40	35
164	Foramsulfuron	Pesticides-Herbicides	173159-57-4	C17H20N6O7S	452.111	13.1499	ESI+	[M+H]+	453.1→182.1	40	30		453.1→139.1	40	65
165	Halosulfuron-methyl	Pesticides-Herbicides	100784-20-1	C13H15ClN6O7S	434.041	12.514	ESI-	[M-H]-	433→252	-50	-25		433→154.1	-20	-40
166	Hexazinone	Pesticides-Herbicides	51235-04-2	C12H20N4O2	252.159	13.1711	ESI+	[M+H]+	253.2→171.1	60	20		253.2→101	40	40
167	Indoxacarb	Pesticides-Herbicides	173584-44-6	C22H17ClF3N3O7	527.071	16.9664	ESI+	[M+H]+	528.1→203	40	65		528.1→218	50	35
168	Isonoruron	Pesticides-Herbicides	28805-78-9	C13H22N2O	222.173	14.4878	ESI+	[M+H]+	223.2→135.1	70	30		223.2→107.1	30	35
169	Isoproturon	Pesticides-Herbicides	34123-59-6	C12H18N2O	206.142	13.8479	ESI+	[M+H]+	207.1→134.1	30	30		207.1→119.1	40	40
170	Isoxaben	Pesticides-Herbicides	82558-50-7	C18H24N2O4	332.174	14.7661	ESI+	[M+H]+	333.2→165.1	30	30		333.2→107	20	80
171	Isoxaflutole	Pesticides-Herbicides	141112-29-0	C15H12F3NO4S	359.044	12.6189	ESI-	[M-H]-	358→108	-30	-45		358→159	-50	-45
172	Linuron	Pesticides-Herbicides	330-55-2	C9H10Cl2N2O2	248.012	14.4688	ESI+	[M+H]+	249→160	20	25		249→133	20	45
173	Mefenacet	Pesticides-Herbicides	73250-68-7	C16H14N2O2S	298.078	15.0406	ESI+	[M+H]+	299.1→148.1	30	20		299.1→120.1	30	35
174	Mesosulfuron-methyl	Pesticides-Herbicides	208465-21-8	C17H21N5O9S2	503.078	13.5	ESI+	[M+H]+	504.1→182.1	40	30		504.1→139.1	20	75
175	Metazosulfuron	Pesticides-Herbicides	868680-84-6	C15H18ClN7O7S	475.068	14.2866	ESI+	[M+H]+	476.1→182.1	50	25		476.1→295	50	25
176	Methabenzthiazuron	Pesticides-Herbicides	18691-97-9	C10H11N3OS	221.062	13.7198	ESI+	[M+H]+	222.1→165	50	20		222.1→150	30	50
177	Methoprotryne	Pesticides-Herbicides	841-06-5	C11H21N5OS	271.147	14.0241	ESI+	[M+H]+	272.2→170	50	40		272.2→198.1	120	30
178	Metobromuron	Pesticides-Herbicides	3060-89-7	C9H11BrN2O2	258	13.6474	ESI+	[M+H]+	259→170	30	30		259→148.1	20	20
179	Metosulam	Pesticides-Herbicides	139528-85-1	C14H13Cl2N5O4S	417.007	13.0086	ESI+	[M+H]+	418→175	50	40		418→140	30	75
180	Metoxuron	Pesticides-Herbicides	19937-59-8	C10H13ClN2O2	228.067	12.7053	ESI+	[M+H]+	229.1→156	30	35		229.1→106	20	45
181	Metribuzin	Pesticides-Herbicides	21087-64-9	C8H14N4OS	214.089	13.2092	ESI+	[M+H]+	215.1→84	65	30		215.1→187.1	65	26
182	Metsulfuron-methyl	Pesticides-Herbicides	74223-64-6	C14H15N5O6S	381.074	12.8987	ESI+	[M+H]+	382.1→167.1	50	25		382.1→199	20	30
183	Monolinuron	Pesticides-Herbicides	1746-81-2	C9H11ClN2O2	214.051	13.4231	ESI+	[M+H]+	215.1→126	20	25		215.1→148.1	40	20
184	Naproanilide	Pesticides-Herbicides	52570-16-8	C19H17NO2	291.126	15.6577	ESI+	[M+H]+	292.1→171.1	50	20		292.1→120.1	40	35
185	Napropamide	Pesticides-Herbicides	15299-99-7	C17H21NO2	271.157	15.4157	ESI+	[M+H]+	272.2→171.1	50	30		272.2→129.1	40	20
186	Neburon	Pesticides-Herbicides	555-37-3	C12H16Cl2N2O	274.064	16.3346	ESI-	[M-H]-	273.1→160	-40	-30		273.1→186	-50	-25
187	Norflurazon	Pesticides-Herbicides	27314-13-2	C12H9ClF3N3O	303.039	13.9086	ESI+	[M+H]+	304→284	100	35		304→160	40	40
188	Oryzalin	Pesticides-Herbicides	19044-88-3	C12H18N4O6S	346.095	15.9782	ESI-	[M-H]-	345.1→147	-80	-35		345.1→174.1	-70	-35
189	Oxadiazon	Pesticides-Herbicides	19666-30-9	C15H18Cl2N2O3	344.069	17.7318	ESI+	[M+H]+	345.1→220	30	30		345.1→177	50	40
190	Pencycuron	Pesticides-Herbicides	66063-05-6	C19H21ClN2O	328.134	16.705	ESI+	[M+H]+	329.1→125	40	60		329.1→106.1	40	30
191	Penoxsulam	Pesticides-Herbicides	219714-96-2	C16H14F5N5O5S	483.064	13.2	ESI+	[M+H]+	484.1→195.1	90	40		484.1→444.1	70	35
192	Picolinafen	Pesticides-Herbicides	137641-05-5	C19H12F4N2O2	376.083	17.602	ESI+	[M+H]+	377.1→238	60	40		377.1→359.1	30	30
193	Prometryn	Pesticides-Herbicides	7287-19-6	C10H19N5S	241.136	14.836	ESI+	[M+H]+	242.1→158	90	35		242.1→200.1	90	25
194	Propazine	Pesticides-Herbicides	139-40-2	C9H16N5Cl	229.109	14.5463	ESI+	[M+H]+	230.1→103.8	120	46		230.1→146.1	120	31
195	Propyrisulfuron	Pesticides-Herbicides	570415-88-2	C16H18ClN7O5S	455.078	14.8803	ESI+	[M+H]+	456.1→261	50	25		456.1→196.1	40	25
196	Pyrazoxyfen	Pesticides-Herbicides	71561-11-0	C20H16Cl2N2O3	402.054	16.1513	ESI+	[M+H]+	403.1→105	80	25		403.1→139.1	80	35
197	Pyributicarb	Pesticides-Herbicides	88678-67-5	C18H22N2O2S	330.14	17.8129	ESI+	[M+H]+	331.1→181	30	25		331.1→108	30	40
198	Pyriftalid	Pesticides-Herbicides	135186-78-6	C15H14N2O4S	318.067	14.1969	ESI+	[M+H]+	319.1→139.1	30	40		319.1→220	60	35
199	Pyriminobac-methyl	Pesticides-Herbicides	136191-64-5	C17H19N3O6	361.127	14.7048	ESI+	[M+H]+	362.1→330.1	50	15		362.1→256.1	30	35
200	Sebuthylazine	Pesticides-Herbicides	7286-69-3	C9H16ClN5	229.109	15.3368	ESI+	[M+H]+	230.1→202.1	20	30		230.1→132	30	30
201	Secbumeton	Pesticides-Herbicides	26259-45-0	C10H19N5O	225.159	13.6684	ESI+	[M+H]+	226.2→142.1	80	35		226.2→170.1	130	25
202	Sethoxydim	Pesticides-Herbicides	74051-80-2	C17H29NO3S	327.187	17.4391	ESI+	[M+H]+	328.2→178.1	30	30		328.2→150.1	30	40
203	Siduron	Pesticides-Herbicides	1982-49-6	C14H20N2O	232.158	14.5373	ESI+	[M+H]+	233.2→137.1	50	25		233.2→120	50	35
204	Simazine	Pesticides-Herbicides	122-34-9	C7H12ClN5	201.078	13.2056	ESI+	[M+H]+	202.1→132	70	28		202.1→124	70	26
205	Simetryn	Pesticides-Herbicides	1014-70-6	C8H15N5S	213.105	13.3961	ESI+	[M+H]+	214.1→124.1	50	30		214.1→144.1	40	30
206	Sulfentrazone	Pesticides-Herbicides	122836-35-5	C11H10Cl2F2N4O3S	385.982	13.1807	ESI+	[M+H]+	387→307	60	30		387→273	40	40
207	Tebutam	Pesticides-Herbicides	35256-85-0	C15H23NO	233.178	15.5677	ESI+	[M+H]+	234.2→192.1	40	20		234.2→142.1	30	20
208	Tebuthiuron	Pesticides-Herbicides	34014-18-1	C9H16N4OS	228.104	13.2493	ESI+	[M+H]+	229.1→116	40	35		229.1→172.1	70	20
209	Terbumeton	Pesticides-Herbicides	33693-04-8	C10H19N5O	225.159	13.7226	ESI+	[M+H]+	226.2→170.1	130	35		226.2→114.1	60	35
210	Terbuthylazine	Pesticides-Herbicides	5915-41-3	C9H16ClN5	229.109	14.4668	ESI+	[M+H]+	230.1→174.1	30	25		230.1→104	30	45
211	Terbutryn	Pesticides-Herbicides	886-50-0	C10H19N5S	241.136	14.9238	ESI+	[M+H]+	242.1→186.1	120	20		242.1→138.1	60	35
212	Thiazafluron	Pesticides-Herbicides	25366-23-8	C6H7F3N4OS	240.029	13.3159	ESI+	[M+H]+	241→184	20	20		241→164	20	35
213	Thiazopyr	Pesticides-Herbicides	117718-60-2	C16H17F5N2O2S	396.093	16.0522	ESI+	[M+H]+	397.1→377.1	60	35		397.1→335	40	40
214	Thifensulfuron-methyl	Pesticides-Herbicides	79277-27-3	C12H13N5O6S2	387.031	12.8133	ESI+	[M+H]+	388→167.1	40	20		388→205	20	35
215	Tralkoxidym	Pesticides-Herbicides	87820-88-0	C20H27NO3	329.199	17.9486	ESI+	[M+H]+	330.2→138.1	20	30		330.2→122.1	20	25
216	Triasulfuron	Pesticides-Herbicides	82097-50-5	C14H16ClN5O5S	401.056	12.7943	ESI+	[M+H]+	402.1→167.1	30	25		402.1→141.1	20	30
217	Triclocarban	Pesticides-Herbicides	101-20-2	C13H9Cl3N2O	313.978	16.9881	ESI+	[M+H]+	315→127	60	45		315→162	20	25
218	Triflumuron	Pesticides-Herbicides	64628-44-0	C15H10ClF3N2O3	358.033	16.4954	ESI+	[M+H]+	359→156	35	24		359→139	35	51
219	Triflusulfuron	Pesticides-Herbicides	126535-15-7	C17H19F3N6O6S	492.104	13.2013	ESI-	[M-H]-	491.1→236	-90	-25		491.1→196	-90	-48
220	Aminocyclopyrachlor	Pesticides-Herbicides	858956-08-8	C8H8ClN3O2	213.031	3.9145	ESI+	[M+H]+	214→68	30	35		-	-	-
221	Benzoylprop-ethyl	Pesticides-Herbicides	22212-55-1	C18H17Cl2NO3	365.059	16.344	ESI+	[M+H]+	366.1→105	30	20		-	-	-
222	Bromacil	Pesticides-Herbicides	314-40-9	C9H13BrN2O2	260.016	13.2918	ESI-	[M-H]-	259→202.9	-50	-25		-	-	-
223	Clodinafop	Pesticides-Herbicides	114420-56-3	C14H11ClFNO4	311.036	13.417	ESI-	[M-H]-	310→218	-20	-30		-	-	-
224	Cycluron	Pesticides-Herbicides	2163-69-1	C11H22N2O	198.173	14.0295	ESI+	[M+H]+	199.2→111.1	30	20		-	-	-
225	Flamprop-isopropyl	Pesticides-Herbicides	52756-22-6	C19H19ClFNO3	363.104	16.2261	ESI+	[M+H]+	364.1→105	30	30		-	-	-
226	Flumetsulam	Pesticides-Herbicides	98967-40-9	C12H9F2N5O2S	325.045	12.1905	ESI+	[M+H]+	326.1→129	40	35		-	-	-
227	Forchlorfenuron	Pesticides-Herbicides	68157-60-8	C12H10ClN3O	247.051	14.1212	ESI-	[M-H]-	246→127	-30	-18		-	-	-
228	Lenacil	Pesticides-Herbicides	2164-08-1	C13H18N2O2	234.137	14.0623	ESI-	[M-H]-	233.1→151.1	-40	-30		-	-	-
229	Terbucarb	Pesticides-Herbicides	1918-11-2	C17H27NO2	277.204	16.9665	ESI+	[M+H]+	278.2→109.1	20	30		-	-	-
230	Thidiazuron	Pesticides-Herbicides	51707-55-2	C9H8N4OS	220.042	13.1393	ESI-	[M-H]-	219→100	-20	-10		-	-	-
231	3,4,5-Trimethylphenyl methylcarbamate	Pesticides-Insecticides	2686-99-9	C11H15NO2	193.11	13.9696	ESI+	[M+H]+	194.1→137.1	20	15		194.1→107	20	55
232	3-Chloro-7-hydroxy-4-methylcoumarin	Pesticides-Insecticides	6174-86-3	C10H7ClO3	210.008	12.8915	ESI-	[M-H]-	209→145	-95	-28		209→117.2	-95	-42
233	Acetamiprid	Pesticides-Insecticides	135410-20-7	C10H11ClN4	222.067	12.3332	ESI+	[M+H]+	223.1→126	40	30		223.1→90.1	40	50
234	Anilofos	Pesticides-Insecticides	64249-01-0	C13H19ClNO3PS2	367.023	16.1335	ESI+	[M+H]+	368→125	20	45		368→171	20	30
235	Aspon	Pesticides-Insecticides	3244-90-4	C12H28O5P2S2	378.085	18.3824	ESI+	[M+H]+	379.1→115	30	50		379.1→210.9	30	25
236	Brodifacoum	Pesticides-Insecticides	56073-10-0	C31H23BrO3	522.083	19.1837	ESI+	[M+H]+	523.1→335	30	30		523.1→178.1	20	45
237	Bromfenvinphos	Pesticides-Insecticides	33399-00-7	C12H14BrCl2O4P	401.919	16.4576	ESI+	[M+H]+	402.9→155	30	20		402.9→170	20	65
238	Buprofezin	Pesticides-Insecticides	69327-76-0	C16H23N3OS	305.156	17.4952	ESI+	[M+H]+	306.2→116.1	30	25		306.2→106.1	40	40
239	Cadusafos	Pesticides-Insecticides	95465-99-9	C10H23O2PS2	270.088	16.7928	ESI+	[M+H]+	271.1→159	30	20		271.1→130.9	30	30
240	Carbofuran	Pesticides-Insecticides	1563-66-2	C12H15NO3	221.105	13.112	ESI+	[M+H]+	222.1→123	20	30		222.1→137.1	30	30
241	Chlorfenvinphos	Pesticides-Insecticides	470-90-6	C12H14Cl3O4P	357.97	16.2866	ESI+	[M+H]+	359→170	20	50		359→204.9	40	30
242	Chlorthiophos	Pesticides-Insecticides	60238-56-4	C11H15Cl2O3PS2	359.958	18.2149	ESI+	[M+H]+	361→304.9	40	25		361→332.9	20	20
243	Chromafenozide	Pesticides-Insecticides	143807-66-3	C24H30N2O3	394.226	15.6832	ESI-	[M-H]-	393.2→149.1	-80	-30		393.2→105.1	-40	-45
244	Clenpenterol hydrochloride	Pesticides-Insecticides	37158-47-7	C13H20Cl2N2O	290.095	12.3874	ESI+	[M+H]+	291.1→203	40	20		291.1→168	40	45
245	Coumaphos	Pesticides-Insecticides	56-72-4	C14H16ClO5PS	362.014	16.1312	ESI+	[M+H]+	363→227	40	35		363→307	70	25
246	Cyanofenphos	Pesticides-Insecticides	13067-93-1	C15H14NO2PS	303.048	16.0682	ESI+	[M+H]+	304.1→276	30	20		304.1→157	30	30
247	Demeton-S-methyl	Pesticides-Insecticides	919-86-8	C6H15O3PS2	230.02	14.8249	ESI+	[M+H]+	231→89	70	40		231→61	50	30
248	Diazinon	Pesticides-Insecticides	333-41-5	C12H21N2O3PS	304.101	16.209	ESI+	[M+H]+	305.1→169.1	20	35		305.1→153.1	60	30
249	Diethyl phosphate	Pesticides-Insecticides	598-02-7	C4H11O4P	154.039	4.13074	ESI-	[M-H]-	153→125	-30	-15		153→79	-30	-20
250	Dinitramine	Pesticides-Insecticides	29091-05-2	C11H13F3N4O4	322.089	16.5075	ESI+	[M+H]+	323.1→289.1	40	25		323.1→247	50	25
251	Disulfoton sulfone	Pesticides-Insecticides	2497-06-5	C8H19O4PS3	306.018	13.5987	ESI+	[M+H]+	307→125	50	20		307→115	30	35
252	Disulfoton-sulfoxide	Pesticides-Insecticides	2497-07-6	C8H19O3PS3	290.023	13.5193	ESI+	[M+H]+	291→185	20	20		291→213	20	15
253	Emamectin benzoate	Pesticides-Insecticides	155569-91-8	C49H75NO13	885.524	18.0311	ESI+	[M+H]+	886.5→158.1	50	50		886.5→302.2	30	45
254	Ethiprole	Pesticides-Insecticides	181587-01-9	C13H9Cl2F3N4OS	395.983	15.0247	ESI-	[M-H]-	395→330	-20	-20		395→262	-20	-40
255	Ethoprophos	Pesticides-Insecticides	13194-48-4	C8H19O2PS2	242.056	15.435	ESI+	[M+H]+	243.1→130.9	40	30		243.1→173	30	20
256	Etoxazole	Pesticides-Insecticides	153233-91-1	C21H23F2NO2	359.17	18.2385	ESI+	[M+H]+	360.2→141	70	40		360.2→304.1	20	25
257	Etrimfos	Pesticides-Insecticides	38260-54-7	C10H17N2O4PS	292.065	16.0296	ESI+	[M+H]+	293.1→125	50	35		293.1→143	40	35
258	Famphur	Pesticides-Insecticides	52-85-7	C10H16NO5PS2	325.021	13.518	ESI+	[M+H]+	326→217	40	30		326→185	30	35
259	Fenamiphos	Pesticides-Insecticides	22224-92-6	C13H22NO3PS	303.106	15.7033	ESI+	[M+H]+	304.1→202	50	45		304.1→217	120	25
260	Fenamiphos sulfone	Pesticides-Insecticides	31972-44-8	C13H22NO5PS	335.096	13.083	ESI+	[M+H]+	336.1→266	50	30		336.1→188	40	40
261	Fenamiphos sulfoxide	Pesticides-Insecticides	31972-43-7	C13H22NO4PS	319.101	13.0099	ESI+	[M+H]+	320.1→233	70	35		320.1→171	60	30
262	Fenazaquin	Pesticides-Insecticides	120928-09-8	C20H22N2O	306.173	18.7729	ESI+	[M+H]+	307.2→161.1	20	25		307.2→131.1	30	60
263	Fenobucarb	Pesticides-Insecticides	3766-81-2	C12H17NO2	207.126	16.1751	ESI+	[M+H]+	208.1→121.1	110	25		208.1→148.1	120	20
264	Fenoxycarb	Pesticides-Insecticides	72490-01-8	C17H19NO4	301.131	15.8024	ESI+	[M+H]+	302.1→116.1	20	15		302.1→256.1	20	20
265	Fenpyroximate	Pesticides-Insecticides	134098-61-6	C24H27N3O4	421.2	18.4287	ESI+	[M+H]+	422.2→366.1	20	25		422.2→135	60	45
266	Fensulfothion	Pesticides-Insecticides	115-90-2	C11H17O4PS2	308.031	13.7622	ESI+	[M+H]+	309→157	40	35		309→173	40	30
267	Fensulfothion-oxon	Pesticides-Insecticides	6552-21-2	C11H17O5PS	292.053	12.5468	ESI+	[M+H]+	293.1→237	60	25		293.1→157	30	35
268	Fensulfothion-oxon-sulfone	Pesticides-Insecticides	6132-17-8	C11H17O6PS	308.048	12.5639	ESI+	[M+H]+	309.1→175	30	35		309.1→253	20	20
269	Fensulfothion-Sulfone	Pesticides-Insecticides	14255-72-2	C11H17O5PS2	324.026	13.9	ESI+	[M+H]+	325→269	40	25		325→191	30	35
270	Fenthion oxon	Pesticides-Insecticides	6552-12-1	C10H15O4PS	262.043	14.1559	ESI+	[M+H]+	263.1→216	40	35		263.1→122	40	45
271	Fenthion sulfone	Pesticides-Insecticides	3761-42-0	C10H15O5PS2	310.01	13.263	ESI+	[M+H]+	311→125	40	25		311→109	40	40
272	Fipronil	Pesticides-Insecticides	120068-37-3	C12H4Cl2F6N4OS	435.939	16.3281	ESI-	[M-H]-	434.9→250	-35	-37		434.9→330	-35	-23
273	Fipronil Desulfinyl	Pesticides-Insecticides	205650-65-3	C12H4Cl2F6N4	387.972	16.0972	ESI-	[M-H]-	387→351	-30	-20		387→282	-30	-40
274	Fipronil sulfone	Pesticides-Insecticides	120068-36-2	C12H4Cl2F6N4O2S	451.934	16.8379	ESI-	[M-H]-	450.9→282	-30	-35		450.9→414.9	-30	-25
275	Fipronil-sulfide	Pesticides-Insecticides	120067-83-6	C12H4Cl2F6N4S	419.944	16.522	ESI-	[M-H]-	418.9→262	-20	-40		418.9→314	-20	-25
276	Fluacrypyrim	Pesticides-Insecticides	229977-93-9	C20H21F3N2O5	426.14	16.901	ESI+	[M+H]+	427.1→145.1	70	35		427.1→117.1	20	65
277	Fluazuron	Pesticides-Insecticides	86811-58-7	C20H10Cl2F5N3O3	505.002	18.0765	ESI+	[M+H]+	506→349	40	30		506→141	40	75
278	Flubendiamide	Pesticides-Insecticides	272451-65-7	C23H22F7IN2O4S	682.023	16.4916	ESI-	[M-H]-	681→254	-40	-35		681→271.9	-40	-25
279	Flufenoxuron	Pesticides-Insecticides	101463-69-8	C21H11ClF6N2O3	488.036	18.3335	ESI+	[M+H]+	489→158	60	25		489→141	40	70
280	Heptenophos	Pesticides-Insecticides	23560-59-0	C9H12ClO4P	250.016	13.9535	ESI+	[M+H]+	251→127	20	20		251→109	20	45
281	Hexythiazox	Pesticides-Insecticides	78587-05-0	C17H21ClN2O2S	352.101	17.9639	ESI+	[M+H]+	353.1→228	20	25		353.1→168.1	20	35
282	Isazofos	Pesticides-Insecticides	42509-80-8	C9H17ClN3O3PS	313.042	15.0977	ESI+	[M+H]+	314→162	50	25		314→120	50	35
283	Isocarbophos	Pesticides-Insecticides	24353-61-5	C11H16NO4PS	289.054	12.1731	ESI-	[M+HCOO]-	334.1→227.1	-70	-40		334.1→180.1	-80	-45
284	Isofenphos oxon	Pesticides-Insecticides	31120-85-1	C15H24NO5P	329.139	15.1527	ESI+	[M+H]+	330.1→201	20	35		330.1→121	30	60
285	Isopropalin	Pesticides-Insecticides	33820-53-0	C15H23N3O4	309.169	18.69	ESI+	[M+H]+	310.2→222.1	40	25		310.2→208.1	20	35
286	Isouron	Pesticides-Insecticides	55861-78-4	C10H17N3O2	211.132	13.2665	ESI+	[M+H]+	212.1→167.1	30	25		212.1→128.1	50	25
287	Isoxathion	Pesticides-Insecticides	18854-01-8	C13H16NO4PS	313.054	16.421	ESI+	[M+H]+	314.1→105	20	20		314.1→114	30	40
288	Legurame	Pesticides-Insecticides	16118-49-3	C12H16N2O3	236.116	12.9001	ESI+	[M+H]+	237.1→118.1	30	20		237.1→120	30	25
289	Lufenuron	Pesticides-Insecticides	103055-07-8	C17H8Cl2F8N2O3	509.978	18.5057	ESI-	[M-H]-	509→175	-20	-50		509→326	-20	-25
290	Malachite green cation	Pesticides-Insecticides	569-64-2	C23H24N2	328.194	13.7929	ESI+	[M+H]+	329.2→313.2	140	55		329.2→208.1	120	60
291	Matrine	Pesticides-Insecticides	519-02-8	C15H24N2O	248.189	4.22468	ESI+	[M+H]+	249.2→148.1	130	45		249.2→247.2	100	35
292	Mephosfolan	Pesticides-Insecticides	950-10-7	C8H16NO3PS2	269.031	12.9767	ESI+	[M+H]+	270→140	30	40		270→168	30	25
293	Mesulfenfos	Pesticides-Insecticides	3761-41-9	C10H15O4PS2	294.015	13.1229	ESI+	[M+H]+	295→280	30	25		295→109	50	45
294	Metaflumizone	Pesticides-Insecticides	139970-56-2	C24H16F6N4O2	506.118	18.41	ESI-	[M-H]-	505.1→302.1	-60	-25		505.1→328.1	-60	-19
295	Methoxyfenozide	Pesticides-Insecticides	161050-58-4	C22H28N2O3	368.21	15.3267	ESI-	[M-H]-	367.2→149.1	-40	-25		367.2→105.1	-40	-45
296	Metolcarb	Pesticides-Insecticides	1129-41-5	C9H11NO2	165.079	16.9411	ESI+	[M+H]+	166.1→109.1	20	20		166.1→107	20	35
297	Mevinphos	Pesticides-Insecticides	7786-34-7	C7H13O6P	224.045	12.5665	ESI+	[M+H]+	225.1→109	30	45		225.1→127	20	20
298	Paraoxon	Pesticides-Insecticides	311-45-5	C10H14NO6P	275.056	13.6075	ESI+	[M+H]+	276.1→220	20	25		276.1→174	30	35
299	Phorate sulfoxide	Pesticides-Insecticides	2588-05-8	C7H17O3PS3	276.008	13.5641	ESI+	[M+H]+	277→199	40	15		277→143	40	29
300	Phosfolan	Pesticides-Insecticides	947-02-4	C7H14NO3PS2	255.015	12.6725	ESI+	[M+H]+	256→140	50	35		256→168	30	25
301	Phosmet-oxon	Pesticides-Insecticides	3735-33-9	C11H12NO5PS	301.017	13.463	ESI+	[M+H]+	302→130	70	65		302→105	40	60
302	Phosphamidon	Pesticides-Insecticides	13171-21-6	C10H19ClNO5P	299.069	12.7579	ESI+	[M+H]+	300.1→127	30	25		300.1→100.1	40	30
303	Piperophos	Pesticides-Insecticides	24151-93-7	C14H28NO3PS2	353.125	16.8965	ESI+	[M+H]+	354.1→170.9	40	30		354.1→142.9	30	45
304	Pirimicarb	Pesticides-Insecticides	23103-98-2	C11H18N4O2	238.143	13.1731	ESI+	[M+H]+	239.2→182.1	30	25		239.2→195.2	30	20
305	Pirimiphos-ethyl	Pesticides-Insecticides	23505-41-1	C13H24N3O3PS	333.128	17.548	ESI+	[M+H]+	334.1→198.1	70	25		334.1→182.1	30	30
306	Pirimiphos-methyl	Pesticides-Insecticides	29232-93-7	C11H20N3O3PS	305.096	16.4377	ESI+	[M+H]+	306.1→164.1	40	30		306.1→108.1	50	45
307	Propaphos	Pesticides-Insecticides	7292-16-2	C13H21O4PS	304.09	16.0976	ESI+	[M+H]+	305.1→221	30	20		305.1→141	30	35
308	Propetamphos	Pesticides-Insecticides	31218-83-4	C10H20NO4PS	281.085	15.1086	ESI+	[M+H]+	282.1→138	50	30		282.1→110	20	50
309	Pyrazophos	Pesticides-Insecticides	13457-18-6	C14H20N3O5PS	373.086	16.4698	ESI+	[M+H]+	374.1→222.1	60	30		374.1→194.1	50	50
310	Pyridaphenthion	Pesticides-Insecticides	119-12-0	C14H17N2O4PS	340.065	15.0493	ESI+	[M+H]+	341.1→189.1	30	30		341.1→205	20	30
311	Pyrimidifen	Pesticides-Insecticides	105779-78-0	C20H28ClN3O2	377.187	17.3759	ESI+	[M+H]+	378.2→184.1	110	25		378.2→150.1	90	50
312	Pyriproxyfen	Pesticides-Insecticides	95737-68-1	C20H19NO3	321.136	17.7919	ESI+	[M+H]+	322.1→185.1	20	30		322.1→129.1	20	45
313	Quinalphos	Pesticides-Insecticides	13593-03-8	C12H15N2O3PS	298.054	15.8521	ESI+	[M+H]+	299.1→163	40	35		299.1→129	40	55
314	Resmethrin	Pesticides-Insecticides	10453-86-8	C22H26O3	338.188	19.1297	ESI+	[M+H]+	339.2→171.1	30	25		339.2→128.1	20	60
315	Spinetoram	Pesticides-Insecticides	187166-40-1	C42H69NO10	747.492	17.3127	ESI+	[M+H]+	748.5→142.1	100	45		748.5→203.1	50	40
316	Spinosyn A	Pesticides-Insecticides	131929-60-7	C41H65NO10	731.461	16.7609	ESI+	[M+H]+	732.5→142.1	20	40		732.5→189.1	20	45
317	Spinosyn D	Pesticides-Insecticides	131929-63-0	C42H67NO10	745.476	17.2748	ESI+	[M+H]+	746.5→142.1	50	35		746.5→189.1	60	45
318	Spirotetramat ketohydroxy	Pesticides-Insecticides	1172134-11-0	C18H23NO4	317.163	13.9207	ESI+	[M+H]+	318.2→268.1	20	25		318.2→214.1	50	40
319	Spirotetramat-enol	Pesticides-Insecticides	203312-38-3	C18H23NO3	301.168	13.4529	ESI+	[M+H]+	302.2→216.1	50	35		302.2→270.1	30	30
320	Spirotetramat-mono-hydroxy	Pesticides-Insecticides	1172134-12-1	C18H25NO3	303.183	12.9769	ESI+	[M+H]+	304.2→211.1	60	25		304.2→169.1	20	35
321	Sulfoxaflor	Pesticides-Insecticides	946578-00-3	C10H10F3N3OS	277.05	12.4813	ESI-	[M-H]-	276→213.1	-30	-20		276→212	-20	-20
322	Tebufenozide	Pesticides-Insecticides	112410-23-8	C22H28N2O2	352.215	15.8225	ESI+	[M+H]+	353.2→133.1	20	40		353.2→105.1	60	55
323	Tebupirimfos	Pesticides-Insecticides	96182-53-5	C13H23N2O3PS	318.117	17.6031	ESI+	[M+H]+	319.1→277.1	30	20		319.1→153.1	20	45
324	Tetrachlorvinphos	Pesticides-Insecticides	22248-79-9	C10H9Cl4O4P	363.899	15.9007	ESI+	[M+H]+	364.9→127	40	20		364.9→203.9	50	60
325	Triazophos	Pesticides-Insecticides	24017-47-8	C12H16N3O3PS	313.065	15.1351	ESI+	[M+H]+	314.1→162.1	20	25		314.1→119.1	40	50
326	Tribufos	Pesticides-Insecticides	78-48-8	C12H27OPS3	314.096	18.8762	ESI+	[M+H]+	315.1→169	50	20		315.1→112.9	30	30
327	3-Methyl-4-nitrophenol	Pesticides-Insecticides	2581-34-2	C7H7NO3	153.043	12.364	ESI-	[M-H]-	152→122.1	-76	-25		-	-	-
328	Chlorpyrifos	Pesticides-Insecticides	2921-88-2	C9H11Cl3NO3PS	348.926	17.92	ESI+	[M+H]+	349.9→197.9	20	25		-	-	-
329	Crufomate	Pesticides-Insecticides	299-86-5	C12H19ClNO3P	291.079	14.4112	ESI+	[M+H]+	292.1→236	50	25		-	-	-
330	Flonicamid	Pesticides-Insecticides	158062-67-0	C9H6F3N3O	229.046	14.6403	ESI+	[M+H]+	230.1→174	60	25		-	-	-
331	Fosthiazate	Pesticides-Insecticides	98886-44-3	C9H18NO3PS2	283.047	13.46	ESI+	[M+H]+	284.1→104	20	30		-	-	-
332	Propamocarb	Pesticides-Insecticides	24579-73-5	C9H20N2O2	188.152	3.47221	ESI+	[M+H]+	189.2→102.1	100	30		-	-	-
333	Prosulfocarb	Pesticides-Insecticides	52888-80-9	C14H21NOS	251.134	17.1996	ESI+	[M+H]+	252.1→91.1	20	45		-	-	-
334	Thiacloprid	Pesticides-Insecticides	111988-49-9	C10H9ClN4S	252.024	12.4569	ESI+	[M+H]+	253→126	20	25		-	-	-
335	Thiobencarb	Pesticides-Insecticides	28249-77-6	C12H16ClNOS	257.064	16.6443	ESI+	[M+H]+	258.1→125	30	30		-	-	-
336	Triamiphos	Pesticides-Insecticides	1031-47-6	C12H19N6OP	294.136	13.7615	ESI+	[M+H]+	295.1→135.1	110	40		-	-	-
337	6-Benzylaminopurine	Pesticides-Others	1214-39-7	C12H11N5	225.101	13.0511	ESI-	[M-H]-	224.1→133	-40	-30		224.1→106	-40	-45
338	alpha-Zearalenol	Pesticides-Others	36455-72-8	C18H24O5	320.162	14.7774	ESI-	[M-H]-	319.2→160	-100	-40		319.2→174	-40	-35
339	Paclobutrazol	Pesticides-Others	76738-62-0	C15H20ClN3O	293.129	14.816	ESI+	[M+H]+	294.1→125	30	50		294.1→165	50	30
340	Pyridalyl	Pesticides-Others	179101-81-6	C18H14Cl4F3NO3	488.968	20.0648	ESI+	[M+H]+	490→109	60	60		490→183	30	25
341	Chlormequat chloride	Pesticides-Others	999-81-5	C5H13ClN+	122.073	3.34418	ESI+	M+	122.1→106	60	25		-	-	-
342	Ethoxyquin	Drugs-Additives	91-53-2	C14H19NO	217.147	14.2304	ESI+	[M+H]+	218.2→174.1	70	40		218.2→160.1	70	45
343	Ethylparaben	Drugs-Additives	120-47-8	C9H10O3	166.063	13.1814	ESI-	[M-H]-	165.1→137	-20	-20		165.1→136	-20	-20
344	Isobutyl 4-hydroxybenzoate	Drugs-Additives	4247-02-3	C11H14O3	194.094	14.8923	ESI-	[M-H]-	193.1→137	-30	-20		193.1→136	-50	-25
345	Neotame	Drugs-Additives	165450-17-9	C20H30N2O5	378.215	14.0123	ESI+	[M+H]+	379.2→172.1	30	30		379.2→259.2	30	35
346	Butylparaben	Drugs-Additives	94-26-8	C11H14O3	194.094	14.8793	ESI-	[M-H]-	193.1→136	-50	-20		-	-	-
347	Cyclamic acid	Drugs-Additives	100-88-9	C6H13NO3S	179.062	3.35204	ESI-	[M-H]-	178.1→80	-75	-37		-	-	-
348	3-O-methyl-Colterol	Drugs-Adrenal receptor drugs	58868-93-2	C13H21NO3	239.152	11.4418	ESI+	[M+H]+	240.2→134.1	20	35		240.2→149.1	20	30
349	Acebutolol	Drugs-Adrenal receptor drugs	37517-30-9	C18H28N2O4	336.205	12.1612	ESI+	[M+H]+	337.2→116.1	80	30		337.2→260.1	60	30
350	Alprenolol	Drugs-Adrenal receptor drugs	13707-88-5	C15H23NO2	249.173	12.9708	ESI+	[M+H]+	250.2→116.1	30	25		250.2→107	30	45
351	Arformoterol Tartrate	Drugs-Adrenal receptor drugs	200815-49-2	C19H24N2O4	344.174	3.26478	ESI+	[M+H]+	345.2→121.1	50	50		345.2→149.1	50	30
352	Atenolol	Drugs-Adrenal receptor drugs	29122-68-7	C14H22N2O3	266.163	3.93731	ESI+	[M+H]+	267.2→145.1	30	35		267.2→190.1	30	25
353	Bambuterol	Drugs-Adrenal receptor drugs	81732-46-9	C18H29N3O5	367.211	12.3428	ESI+	[M+H]+	368.2→294.1	140	20		368.2→249.1	30	35
354	Betaxolol	Drugs-Adrenal receptor drugs	63659-19-8	C18H29NO3	307.215	12.9752	ESI+	[M+H]+	308.2→116.1	70	30		308.2→121.1	70	35
355	Bisoprolol	Drugs-Adrenal receptor drugs	66722-44-9	C18H31NO4	325.225	12.651	ESI+	[M+H]+	326.2→116.1	50	25		326.2→107	20	65
356	Brombuterol	Drugs-Adrenal receptor drugs	21912-49-2	C12H18Br2N2O	363.979	12.3354	ESI+	[M+H]+	365→290.9	30	25		365→212	30	40
357	Carazolol	Drugs-Adrenal receptor drugs	57775-29-8	C18H22N2O2	298.168	12.3266	ESI+	[M+H]+	299.2→116.1	60	30		299.2→222.1	30	30
358	Cimaterol	Drugs-Adrenal receptor drugs	54239-37-1	C12H17N3O	219.137	3.29223	ESI+	[M+H]+	220.1→160.1	20	25		220.1→143.1	20	35
359	Clenbuterol	Drugs-Adrenal receptor drugs	37148-27-9	C12H18Cl2N2O	276.08	12.1755	ESI+	[M+H]+	277.1→259	40	17		277.1→203	40	25
360	Clenproperol	Drugs-Adrenal receptor drugs	38339-11-6	C11H16Cl2N2O	262.064	12.0173	ESI+	[M+H]+	263.1→203	30	25		263.1→132.1	20	40
361	Clorprenaline	Drugs-Adrenal receptor drugs	3811-25-4	C11H16ClNO	213.092	12.1979	ESI+	[M+H]+	214.1→154	20	25		214.1→119.1	30	40
362	Isoxsuprine	Drugs-Adrenal receptor drugs	579-56-6	C18H23NO3	301.168	12.3328	ESI+	[M+H]+	302.2→107	20	40		302.2→150.1	50	30
363	Mapenterol Hydrochloride	Drugs-Adrenal receptor drugs	54238-51-6	C14H20ClF3N2O	324.122	12.5555	ESI+	[M+H]+	325.1→237	30	20		325.1→217	30	35
364	Metoprolol	Drugs-Adrenal receptor drugs	37350-58-6	C15H25NO3	267.183	3.92559	ESI+	[M+H]+	268.2→116.1	70	25		268.2→133.1	60	35
365	Penbutolol	Drugs-Adrenal receptor drugs	38363-40-5	C18H29NO2	291.22	14.4776	ESI+	[M+H]+	292.2→201.1	50	30		292.2→133.1	50	35
366	Propranolol hydrochloride	Drugs-Adrenal receptor drugs	318-98-9	C16H21NO2	259.157	12.8662	ESI+	[M+H]+	260.2→116.1	30	25		260.2→183.1	70	25
367	Ractopamine	Drugs-Adrenal receptor drugs	97825-25-7	C18H23NO3	301.168	11.8907	ESI+	[M+H]+	302.2→164.1	30	25		302.2→107	30	55
368	Salbutamol	Drugs-Adrenal receptor drugs	18559-94-9	C13H21NO3	239.152	3.89195	ESI+	[M+H]+	240.2→148.1	40	25		240.2→121.1	30	40
369	Salmeterol	Drugs-Adrenal receptor drugs	89365-50-4	C25H37NO4	415.272	14.4946	ESI+	[M+H]+	416.3→398.3	90	23		416.3→380.1	90	28
370	Timolol	Drugs-Adrenal receptor drugs	26921-17-5	C13H24N4O3S	316.157	12.2287	ESI+	[M+H]+	317.2→261.1	30	25		317.2→244.1	50	30
371	Tulobuterol	Drugs-Adrenal receptor drugs	41570-61-0	C12H18ClNO	227.108	12.3644	ESI+	[M+H]+	228.1→154	30	25		228.1→119.1	30	40
372	Zilpaterol	Drugs-Adrenal receptor drugs	117827-79-9	C14H19N3O2	261.148	4.26197	ESI+	[M+H]+	262.2→185.1	40	35		262.2→202.1	30	25
373	Ritodrine	Drugs-Adrenal receptor drugs	23239-51-2	C17H21NO3	287.152	3.38098	ESI+	[M+H]+	288.2→103.1	20	55		-	-	-
374	Brompheniramine	Drugs-Antihistamines	86-22-6	C16H19BrN2	318.073	12.8348	ESI+	[M+H]+	319.1→167.1	20	60		319.1→274	40	25
375	Cetirizine hydrochloride	Drugs-Antihistamines	83881-51-0	C21H25ClN2O3	388.155	14.1944	ESI+	[M+H]+	389.2→201	40	25		389.2→165.1	40	80
376	Chlorpheniramine maleate	Drugs-Antihistamines	132-22-9	C16H19ClN2	274.124	12.7032	ESI+	[M+H]+	275.1→230.1	80	20		275.1→167.1	20	60
377	Cyproheptadine	Drugs-Antihistamines	129-03-3	C21H21N	287.167	13.6044	ESI+	[M+H]+	288.2→191.1	70	40		288.2→215.1	40	65
378	Diphenhydramine hydrochloride	Drugs-Antihistamines	58-73-1	C17H21NO	255.162	12.913	ESI+	[M+H]+	256.2→167.1	20	25		256.2→152.1	40	50
379	Hydroxyzine dihydrochloride	Drugs-Antihistamines	68-88-2	C21H27ClN2O2	374.176	13.8648	ESI+	[M+H]+	375.2→201	40	30		375.2→166.1	20	55
380	Loratadine	Drugs-Antihistamines	79794-75-5	C22H23ClN2O2	382.145	16.3167	ESI+	[M+H]+	383.2→337.1	130	35		383.2→267.1	90	50
381	Promethazine	Drugs-Antihistamines	60-87-7	C17H20N2S	284.135	13.3986	ESI+	[M+H]+	285.1→198	30	35		285.1→240.1	30	25
382	Terfenadine	Drugs-Antihistamines	50679-08-8	C32H41NO2	471.314	15.3374	ESI+	[M+H]+	472.3→436.3	30	35		472.3→262.2	40	45
383	Tripelennamine hydrochloride	Drugs-Antihistamines	91-81-6	C16H21N3	255.174	12.5424	ESI+	[M+H]+	256.2→211.1	90	20		256.2→119.1	40	50
384	Desloratadine	Drugs-Antihistamines	100643-71-8	C19H19ClN2	310.124	3.31219	ESI+	[M+H]+	311.1→294.1	20	30		-	-	-
385	Acetil acid	Drugs-Anti-inflammatory drugs	147676-78-6	C18H20N4O4	356.148	14.3866	ESI+	[M+H]+	357.2→329.1	80	35		357.2→285.1	60	40
386	Flunixin	Drugs-Anti-inflammatory drugs	42461-84-7	C14H11F3N2O2	296.077	14.0017	ESI-	[M-H]-	295.1→209.1	-30	-40		295.1→209.1	-40	-40
387	Ketoprofen	Drugs-Anti-inflammatory drugs	22071-15-4	C16H14O3	254.094	14.1391	ESI+	[M+H]+	255.1→105	30	35		255.1→177.1	60	25
388	Ketorolac	Drugs-Anti-inflammatory drugs	74103-06-3	C15H13NO3	255.09	13.5792	ESI+	[M+H]+	256.1→105	70	25		256.1→178	40	35
389	Mefenamic Acid	Drugs-Anti-inflammatory drugs	61-68-7	C15H15NO2	241.11	17.0147	ESI+	[M+H]+	242.1→224.1	20	25		242.1→209.1	30	40
390	Niflumic Acid	Drugs-Anti-inflammatory drugs	4394-00-7	C13H9F3N2O2	282.062	13.9783	ESI-	[M-H]-	281.1→237.1	-20	-25		281.1→177	-20	-45
391	Phenylbutazone	Drugs-Anti-inflammatory drugs	50-33-9	C19H20N2O2	308.152	15.2487	ESI+	[M+H]+	309.2→120	60	25		309.2→160.1	50	30
392	Piroxicam	Drugs-Anti-inflammatory drugs	36322-90-4	C15H13N3O4S	331.063	13.2081	ESI+	[M+H]+	332.1→121	20	40		332.1→164.1	50	25
393	Sulindac	Drugs-Anti-inflammatory drugs	38194-50-2	C20H17FO3S	356.088	14.0604	ESI+	[M+H]+	357.1→233.1	70	75		357.1→340.1	60	30
394	Carprofen	Drugs-Anti-inflammatory drugs	53716-49-7	C15H12ClNO2	273.056	14.1621	ESI-	[M-H]-	272→226	-20	-40		-	-	-
395	Diclofenac Acid	Drugs-Anti-inflammatory drugs	15307-86-5	C14H11Cl2NO2	295.017	15.9045	ESI+	[M+H]+	296→214	20	50		-	-	-
396	Diflunisal	Drugs-Anti-inflammatory drugs	22494-42-4	C13H8F2O3	250.044	13.43	ESI-	[M-H]-	249→205	-40	-25		-	-	-
397	Flufenamic acid	Drugs-Anti-inflammatory drugs	530-78-9	C14H10F3NO2	281.066	14.7749	ESI-	[M-H]-	280.1→215.1	-30	-40		-	-	-
398	Tolfenamic Acid	Drugs-Anti-inflammatory drugs	13710-19-5	C14H12ClNO2	261.056	15.0419	ESI-	[M-H]-	260→216.1	-30	-20		-	-	-
399	Albendazole	Drugs-Antimicrobial Agents	54965-21-8	C12H15N3O2S	265.088	14.1612	ESI+	[M+H]+	266.1→234.1	40	25		266.1→191	60	45
400	Arsanilic acid	Drugs-Antimicrobial Agents	98-50-0	C6H8AsNO3	216.972	4.59762	ESI+	[M+H]+	218→109.1	30	25		218→108	30	30
401	Azithromycin	Drugs-Antimicrobial Agents	83905-01-5	C38H72N2O12	748.509	4.14774	ESI+	[M+H]+	749.5→591.4	20	45		749.5→158.1	20	50
402	Ciprofloxacin	Drugs-Antimicrobial Agents	85721-33-1	C17H18FN3O3	331.133	3.58633	ESI+	[M+H]+	332.1→314.1	60	30		332.1→231.1	70	55
403	clinafoxacin,HCl	Drugs-Antimicrobial Agents	105956-97-6	C17H17ClFN3O3	365.094	3.48321	ESI+	[M+H]+	366.1→348.1	30	25		366.1→272.1	40	40
404	Clindamycin	Drugs-Antimicrobial Agents	58207-19-5	C18H33ClN2O5S	424.18	3.40373	ESI+	[M+H]+	425.2→126.1	116	37		425.2→377.2	140	27
405	Danofloxacin	Drugs-Antimicrobial Agents	112398-08-0	C19H20FN3O3	357.149	3.44621	ESI+	[M+H]+	358.2→340.1	70	30		358.2→255.1	40	55
406	Difloxacin hydrochloride	Drugs-Antimicrobial Agents	98106-17-3	C21H19F2N3O3	399.139	12.0378	ESI+	[M+H]+	400.1→382.1	20	35		400.1→356.2	20	30
407	Enrofloxacin	Drugs-Antimicrobial Agents	93106-60-6	C19H22FN3O3	359.165	3.42348	ESI+	[M+H]+	360.2→342.2	50	30		360.2→316.2	60	30
408	Erythromycin	Drugs-Antimicrobial Agents	114-07-8	C37H67NO13	733.461	13.6208	ESI+	[M+H]+	734.5→158.1	30	35		734.5→576.4	20	25
409	Ethopabate	Drugs-Antimicrobial Agents	59-06-3	C12H15NO4	237.1	12.8384	ESI+	[M+H]+	238.1→136	20	40		238.1→164.1	20	30
410	Fenbendazole	Drugs-Antimicrobial Agents	43210-67-9	C15H13N3O2S	299.073	14.9714	ESI+	[M+H]+	300.1→268.1	130	25		300.1→159	80	45
411	Fleroxacin	Drugs-Antimicrobial Agents	79660-72-3	C17H18F3N3O3	369.13	3.3605	ESI+	[M+H]+	370.1→326.1	80	30		370.1→352.1	30	30
412	Flumequine	Drugs-Antimicrobial Agents	42835-25-6	C14H12FNO3	261.08	13.1402	ESI+	[M+H]+	262.1→244.1	110	20		262.1→202	30	50
413	Gatifloxacin	Drugs-Antimicrobial Agents	112811-59-3	C19H22FN3O4	375.159	3.41173	ESI+	[M+H]+	376.2→358.2	80	30		376.2→261.1	40	45
414	Josamycin	Drugs-Antimicrobial Agents	16846-24-5	C42H69NO15	827.467	14.2388	ESI+	[M+H]+	828.5→174.1	20	40		828.5→109.1	30	80
415	Ketoconazole	Drugs-Antimicrobial Agents	65277-42-1	C26H28Cl2N4O4	530.149	13.8091	ESI+	[M+H]+	531.2→489.1	60	45		531.2→244	140	45
416	Mebendazole	Drugs-Antimicrobial Agents	31431-39-7	C16H13N3O3	295.096	13.4857	ESI+	[M+H]+	296.1→264.1	70	30		296.1→105	30	45
417	Mebendazole-amine	Drugs-Antimicrobial Agents	52329-60-9	C14H11N3O	237.09	12.4699	ESI+	[M+H]+	238.1→105	90	35		238.1→133.1	70	45
418	Methicillin	Drugs-Antimicrobial Agents	132-92-3	C17H20N2O6S	380.104	6.68539	ESI+	[M+H]+	381.1→222.1	40	35		381.1→128.1	20	40
419	Moxifloxacin	Drugs-Antimicrobial Agents	151096-09-2	C21H24FN3O4	401.175	3.41356	ESI+	[M+H]+	402.2→384.2	20	30		402.2→364.2	70	40
420	N4-phthalylsulfathiazole	Drugs-Antimicrobial Agents	85-73-4	C17H13N3O5S2	403.03	12.145	ESI+	[M+H]+	404→156	40	30		404→149	40	50
421	Nadifloxacin	Drugs-Antimicrobial Agents	124858-35-1	C19H21FN2O4	360.149	13.339	ESI+	[M+H]+	361.2→343.1	150	45		361.2→283.1	50	50
422	Naftifine hydrochloride	Drugs-Antimicrobial Agents	65473-14-5	C21H21N	287.167	13.4541	ESI+	[M+H]+	288.2→117.1	30	20		288.2→141.1	20	40
423	Nalidixic acid	Drugs-Antimicrobial Agents	389-08-2	C12H12N2O3	232.085	12.9874	ESI+	[M+H]+	233.1→187.1	20	35		233.1→215.1	20	20
424	Nicarbazin	Drugs-Antimicrobial Agents	587-90-6	C13H10N4O5	302.065	15.4439	ESI-	[M-H]-	301.1→137	-40	-26		301.1→107	-40	-50
425	Norfloxacin	Drugs-Antimicrobial Agents	70458-96-7	C16H18FN3O3	319.133	3.79352	ESI+	[M+H]+	320.1→302.1	30	30		320.1→282.1	40	45
426	Orbifloxacin	Drugs-Antimicrobial Agents	113617-63-3	C19H20F3N3O3	395.146	11.9915	ESI+	[M+H]+	396.2→352.2	40	25		396.2→378.1	50	30
427	Oxfendazole	Drugs-Antimicrobial Agents	53716-50-0	C15H13N3O3S	315.068	12.7592	ESI+	[M+H]+	316.1→159	70	50		316.1→191.1	60	30
428	Oxfendazole-Sulfone	Drugs-Antimicrobial Agents	54029-20-8	C15H13N3O4S	331.063	12.7799	ESI+	[M+H]+	332.1→300	80	30		332.1→159	70	50
429	Oxilinic acid	Drugs-Antimicrobial Agents	14698-29-4	C13H11NO5	261.064	12.5271	ESI+	[M+H]+	262.1→244.1	70	20		262.1→216	30	40
430	Pazufloxacin mesilate	Drugs-Antimicrobial Agents	163680-77-1	C16H15FN2O4	318.102	3.523	ESI+	[M+H]+	319.1→301.1	30	25		319.1→281.1	30	35
431	Pipemidic acid	Drugs-Antimicrobial Agents	51940-44-4	C14H17N5O3	303.133	3.82805	ESI+	[M+H]+	304.1→286.1	50	25		304.1→215.1	50	45
432	Quinocetone	Drugs-Antimicrobial Agents	81810-66-4	C18H14N2O3	306.1	13.3599	ESI+	[M+H]+	307.1→103.1	30	55		307.1→131	40	35
433	Roxithromycin	Drugs-Antimicrobial Agents	80214-83-1	C41H76N2O15	836.525	14.7076	ESI+	[M+H]+	837.5→679.4	40	35		837.5→158.1	60	35
434	Sarafloxacin	Drugs-Antimicrobial Agents	98105-99-8	C20H17F2N3O3	385.124	3.48	ESI+	[M+H]+	386.1→342.1	50	25		386.1→299.1	80	40
435	Sparfloxacin	Drugs-Antimicrobial Agents	110871-86-8	C19H22F2N4O3	392.166	3.7	ESI+	[M+H]+	393.2→349.2	40	30		393.2→292.1	30	35
436	Sulfachinoxalin	Drugs-Antimicrobial Agents	59-40-5	C14H12N4O2S	300.068	12.4783	ESI+	[M+H]+	301.1→156	50	25		301.1→108	30	35
437	Sulfadimethoxine	Drugs-Antimicrobial Agents	122-11-2	C12H14N4O4S	310.074	12.4108	ESI+	[M+H]+	311.1→156	60	30		311.1→92	60	47
438	Sulfanitran	Drugs-Antimicrobial Agents	122-16-7	C14H13N3O5S	335.058	12.1633	ESI-	[M-H]-	334.1→227.1	-70	-40		334.1→180.1	-50	-45
439	Sulfaphenazole	Drugs-Antimicrobial Agents	526-08-9	C15H14N4O2S	314.084	12.2797	ESI+	[M+H]+	315.1→158.1	50	45		315.1→160.1	40	30
440	Sulfapyrazole	Drugs-Antimicrobial Agents	852-19-7	C16H16N4O2S	328.099	12.433	ESI+	[M+H]+	329.1→172.1	70	40		329.1→173.1	20	30
441	Sulfasalazine	Drugs-Antimicrobial Agents	599-79-1	C18H14N4O5S	398.068	13.0457	ESI+	[M+H]+	399.1→381.1	20	30		399.1→223.1	50	40
442	Tetraconazole	Drugs-Antimicrobial Agents	112281-77-3	C13H11Cl2F4N3O	371.022	15.4708	ESI+	[M+H]+	372→159	50	40		372→150	20	40
443	Triclabendazole	Drugs-Antimicrobial Agents	68786-66-3	C14H9Cl3N2OS	357.95	17.596	ESI-	[M-H]-	356.9→197	-40	-45		356.9→341.9	-70	-35
444	Trimethoprim	Drugs-Antimicrobial Agents	738-70-5	C14H18N4O3	290.138	11.7637	ESI+	[M+H]+	291.1→230.1	40	35		291.1→261.1	30	35
445	Validamycin	Drugs-Antimicrobial Agents	50642-14-3	C20H35NO13	497.211	8.78044	ESI+	[M+H]+	498.2→142.1	130	45		498.2→178.1	60	40
446	2-Aminoflubendazole	Drugs-Antimicrobial Agents	82050-13-3	C14H10FN3O	255.081	12.5941	ESI+	[M+H]+	256.1→123	90	35		-	-	-
447	Chloramphenicol	Drugs-Antimicrobial Agents	56-75-7	C11H12Cl2N2O5	322.012	12.6374	ESI-	[M-H]-	321→121	-30	-40		-	-	-
448	Flubendazole	Drugs-Antimicrobial Agents	31430-15-6	C16H12FN3O3	313.086	14.1325	ESI-	[M-H]-	312.1→280.1	-50	-30		-	-	-
449	Lincomycin	Drugs-Antimicrobial Agents	154-21-2	C18H34N2O6S	406.214	4.43534	ESI+	[M+H]+	407.2→126.1	40	35		-	-	-
450	Thiabendazole	Drugs-Antimicrobial Agents	148-79-8	C10H7N3S	201.036	12.1764	ESI+	[M+H]+	202→175	110	35		-	-	-
451	Androstenedione	Drugs-Hormones	63-05-8	C19H26O2	286.193	14.4796	ESI+	[M+H]+	287.2→109.1	30	35		287.2→123.1	60	35
452	Chlormadinone Acetate	Drugs-Hormones	302-22-7	C23H29ClO4	404.175	15.9058	ESI+	[M+H]+	405.2→301.1	90	30		405.2→267.2	30	35
453	Cortisol	Drugs-Hormones	50-23-7	C21H30O5	362.209	13.3715	ESI+	[M+H]+	363.2→121.1	40	35		363.2→327.2	60	25
454	Finasteride	Drugs-Hormones	98319-26-7	C23H36N2O2	372.278	15.0502	ESI+	[M+H]+	373.3→317.2	90	30		373.3→305.3	130	40
455	Genistein	Drugs-Hormones	446-72-0	C15H10O5	270.053	12.5407	ESI-	[M-H]-	269→133	-140	-40		269→159	-140	-40
456	Gestrinone	Drugs-Hormones	16320-04-0	C21H24O2	308.178	14.689	ESI+	[M+H]+	309.2→241.2	40	35		309.2→199.1	20	45
457	Hydroxyprogesterone	Drugs-Hormones	68-96-2	C21H30O3	330.219	15.011	ESI+	[M+H]+	331.2→109.1	40	40		331.2→163.1	70	30
458	Hydroxyprogesterone caproate	Drugs-Hormones	630-56-8	C27H40O4	428.293	17.7916	ESI+	[M+H]+	429.3→271.2	50	25		429.3→253.2	80	30
459	Medroxyprogesterone acetate	Drugs-Hormones	71-58-9	C24H34O4	386.246	15.961	ESI+	[M+H]+	387.3→285.2	80	25		387.3→123.1	80	40
460	Megestrol	Drugs-Hormones	3562-63-8	C22H30O3	342.219	15.4103	ESI+	[M+H]+	343.2→267.2	70	30		343.2→187.1	50	30
461	Megestrol acetate	Drugs-Hormones	595-33-5	C24H32O4	384.23	15.7993	ESI+	[M+H]+	385.2→267.2	30	25		385.2→224.2	30	35
462	Methyltestosterone	Drugs-Hormones	58-18-4	C20H30O2	302.225	15.2664	ESI+	[M+H]+	303.2→109.1	30	40		303.2→123.1	80	50
463	Norethindrone	Drugs-Hormones	68-22-4	C20H26O2	298.193	14.4581	ESI+	[M+H]+	299.2→109.1	80	35		299.2→145.1	70	30
464	Prednisolone	Drugs-Hormones	50-24-8	C21H28O5	360.194	13.3725	ESI+	[M+H]+	361.2→173.1	20	35		361.2→147.1	40	50
465	Procaterol	Drugs-Hormones	81262-93-3	C16H22N2O3	290.163	4.43088	ESI+	[M+H]+	291.2→231.1	20	30		291.2→162.1	40	35
466	Progesterone	Drugs-Hormones	57-83-0	C21H30O2	314.225	16.1317	ESI+	[M+H]+	315.2→109.1	30	35		315.2→123.1	40	40
467	Tadalafil	Drugs-Hormones	171596-29-5	C22H19N3O4	389.138	13.7598	ESI+	[M+H]+	390.1→268.1	20	25		390.1→135	70	30
468	Testosterone	Drugs-Hormones	58-22-0	C19H28O2	288.209	14.8608	ESI+	[M+H]+	289.2→109.1	80	35		289.2→123.1	60	35
469	Testosterone propionate	Drugs-Hormones	57-85-2	C22H32O3	344.235	17.7273	ESI+	[M+H]+	345.2→109.1	80	40		345.2→175.1	40	30
470	Estrone	Drugs-Hormones	53-16-7	C18H22O2	270.162	14.9402	ESI-	[M-H]-	269.2→145.1	-100	-53		-	-	-
471	Hexestrol	Drugs-Hormones	5635-50-7	C18H22O2	270.162	15.5284	ESI-	[M-H]-	269.2→119.1	-30	-50		-	-	-
472	7-Aminoflunitrazepam	Drugs-Others	34084-50-9	C16H14FN3O	283.112	12.3746	ESI+	[M+H]+	284.1→135.1	20	35		284.1→227.1	70	35
473	Acepromazine	Drugs-Others	3598-37-6	C19H22N2OS	326.145	13.3439	ESI+	[M+H]+	327.2→254.1	60	35		327.2→222.1	20	55
474	Aildenafil	Drugs-Others	496835-35-9	C23H32N6O4S	488.221	13.2918	ESI+	[M+H]+	489.2→283.1	40	55		489.2→311.2	130	45
475	Amitriptyline	Drugs-Others	50-48-6	C20H23N	277.183	13.8647	ESI+	[M+H]+	278.2→105.1	60	30		278.2→191.1	40	35
476	Amlodipine besylate	Drugs-Others	88150-42-9	C20H25ClN2O5	408.145	14.0845	ESI+	[M+H]+	409.2→206	50	40		409.2→220.1	30	35
477	Benzydamine	Drugs-Others	132-69-4	C19H23N3O	309.184	13.3435	ESI+	[M+H]+	310.2→265.1	40	25		310.2→174.1	40	35
478	Bromperidol	Drugs-Others	10457-90-6	C21H23BrFNO2	419.09	13.1519	ESI+	[M+H]+	420.1→165.1	40	35		420.1→123	80	75
479	Buformin hydrochloride	Drugs-Others	692-13-7	C6H15N5	157.133	3.51219	ESI+	[M+H]+	158.1→116.1	20	25		158.1→141.1	40	20
480	Carbamazepine	Drugs-Others	298-46-4	C15H12N2O	236.095	13.3281	ESI+	[M+H]+	237.1→194.1	100	20		237.1→179.1	60	50
481	Chlorpromazine	Drugs-Others	50-53-3	C17H19ClN2S	318.096	14.3364	ESI+	[M+H]+	319.1→214	40	60		319.1→246	30	35
482	Clonazepam	Drugs-Others	1622-61-3	C15H10ClN3O3	315.041	13.3969	ESI+	[M+H]+	316→270.1	70	35		316→214	90	50
483	Codeine	Drugs-Others	76-57-3	C18H21NO3	299.152	3.47493	ESI+	[M+H]+	300.2→215.1	80	35		300.2→199.1	80	40
484	Diazepam	Drugs-Others	439-14-5	C16H13ClN2O	284.072	14.7326	ESI+	[M+H]+	285.1→193	85	46		285.1→154.1	85	39
485	Droperidol	Drugs-Others	548-73-2	C22H22FN3O2	379.17	12.5077	ESI+	[M+H]+	380.2→165.1	50	35		380.2→194.1	20	25
486	Fluphenazine	Drugs-Others	69-23-8	C22H26F3N3OS	437.175	15.2783	ESI+	[M+H]+	438.2→171.1	110	30		438.2→143.1	50	40
487	Gabapentin	Drugs-Others	60142-96-3	C9H17NO2	171.126	4.2674	ESI+	[M+H]+	172.1→137.1	20	20		172.1→119.1	20	25
488	Ganciclovir	Drugs-Others	82410-32-0	C9H13N5O4	255.097	4.65139	ESI+	[M+H]+	256.1→152.1	20	25		256.1→135	20	45
489	Glibornuride	Drugs-Others	26944-48-9	C18H26N2O4S	366.161	14.0829	ESI-	[M-H]-	365.2→170	-20	-35		365.2→106.1	-40	-60
490	Gliclazide	Drugs-Others	21187-98-4	C15H21N3O3S	323.13	14.1278	ESI+	[M+H]+	324.1→127.1	40	25		324.1→110.1	30	30
491	Glimepiride	Drugs-Others	93479-97-1	C24H34N4O5S	490.225	14.9516	ESI-	[M-H]-	489.2→225	-50	-45		489.2→364.1	-20	-35
492	Haloperidol	Drugs-Others	52-86-8	C21H23ClFNO2	375.14	13.0028	ESI+	[M+H]+	376.1→165.1	130	35		376.1→123	40	70
493	Hydroquinidine	Drugs-Others	1435-55-8	C20H26N2O2	326.199	12.28	ESI+	[M+H]+	327.2→309.2	60	35		327.2→160.1	90	45
494	Hydroxyhomosildenafil	Drugs-Others	139755-85-4	C23H32N6O5S	504.215	14.4427	ESI-	[M-H]-	503.2→282.1	-30	-60		503.2→475.2	-40	-40
495	Imipramine hydrochloride	Drugs-Others	50-49-7	C19H24N2	280.194	13.6457	ESI+	[M+H]+	281.2→86	65	24		281.2→58	65	65
496	Irbesartan	Drugs-Others	138402-11-6	C25H28N6O	428.232	14.5518	ESI+	[M+H]+	429.2→195.1	80	30		429.2→207.1	80	30
497	Metformin	Drugs-Others	1115-70-4	C4H11N5	129.101	4.089	ESI+	[M+H]+	130.1→60.1	40	20		130.1→71.1	10	30
498	Minoxidil	Drugs-Others	38304-91-5	C9H15N5O	209.128	3.2774	ESI+	[M+H]+	210.1→164.1	30	35		210.1→110.1	20	35
499	Nicotine	Drugs-Others	54-11-5	C10H14N2	162.116	3.99835	ESI+	[M+H]+	163.1→130.1	30	30		163.1→132.1	50	20
500	Nifedipine	Drugs-Others	21829-25-4	C17H18N2O6	346.116	13.8079	ESI+	[M+H]+	347.1→254.1	30	30		347.1→195.1	30	55
501	Nitrendipine	Drugs-Others	39562-70-4	C18H20N2O6	360.132	14.9384	ESI+	[M+H]+	361.1→315.1	40	20		361.1→255.1	40	35
502	Norfludiazepam	Drugs-Others	2886-65-9	C15H10ClFN2O	288.047	14.0164	ESI+	[M+H]+	289.1→140	70	40		289.1→226.1	50	40
503	Norharman	Drugs-Others	244-63-3	C11H8N2	168.069	12.0638	ESI+	[M+H]+	169.1→115.1	30	45		169.1→142.1	40	40
504	Noscapine	Drugs-Others	128-62-1	C22H23NO7	413.147	12.3188	ESI+	[M+H]+	414.2→220.1	40	30		414.2→353.1	40	35
505	Oseltamivir	Drugs-Others	204255-11-8	C16H28N2O4	312.205	13.0396	ESI+	[M+H]+	313.2→166.1	20	30		313.2→208.1	30	20
506	Oxarbazepine	Drugs-Others	28721-07-5	C15H12N2O2	252.09	12.8216	ESI+	[M+H]+	253.1→180.1	40	45		253.1→208.1	40	30
507	Papaverine	Drugs-Others	58-74-2	C20H21NO4	339.147	12.2781	ESI+	[M+H]+	340.2→324.1	40	40		340.2→202.1	50	40
508	Penfluridol	Drugs-Others	26864-56-2	C28H27ClF5NO	523.17	15.5912	ESI+	[M+H]+	524.2→109	30	80		524.2→506.2	40	35
509	Perphenazine	Drugs-Others	58-39-9	C21H26ClN3OS	403.149	14.9517	ESI+	[M+H]+	404.2→171.1	30	30		404.2→143.1	30	40
510	Phenformin	Drugs-Others	834-28-6	C10H15N5	205.133	11.99	ESI+	[M+H]+	206.1→60.1	60	20		206.1→105.1	30	35
511	Pioglitazone hydrochloride	Drugs-Others	111025-46-8	C19H20N2O3S	356.119	12.9891	ESI+	[M+H]+	357.1→134.1	40	35		357.1→135.1	60	35
512	Prazosin hydrochloride	Drugs-Others	19216-56-9	C19H21N5O4	383.159	12.2848	ESI+	[M+H]+	384.2→247.1	60	40		384.2→138.1	20	40
513	Pseudovardenafil	Drugs-Others	224788-34-5	C22H29N5O4S	459.194	15.6455	ESI+	[M+H]+	460.2→151.1	100	70		460.2→312.2	90	50
514	Repaglinide	Drugs-Others	135062-02-1	C27H36N2O4	452.268	16.5287	ESI+	[M+H]+	453.3→230.2	130	50		453.3→162.1	20	30
515	Rosiglitazone maleate	Drugs-Others	122320-73-4	C18H19N3O3S	357.115	12.225	ESI+	[M+H]+	358.1→135.1	80	35		358.1→107.1	60	55
516	Sulfoaildenafil	Drugs-Others	856190-47-1	C23H32N6O3S2	504.198	15.1712	ESI+	[M+H]+	505.2→299.1	40	50		505.2→327.1	90	40
517	Thebaine	Drugs-Others	115-37-7	C19H21NO3	311.152	12.0677	ESI+	[M+H]+	312.2→251.1	30	40		312.2→249.1	40	25
518	Tolbutamide	Drugs-Others	64-77-7	C12H18N2O3S	270.104	12.6914	ESI-	[M-H]-	269.1→170	-20	-28		269.1→106.1	-20	-47
519	Vardenafil	Drugs-Others	224785-90-4	C23H32N6O4S	488.221	13.1577	ESI+	[M+H]+	489.2→151.1	20	70		489.2→312.2	30	55
520	Vildagliptin	Drugs-Others	274901-16-5	C17H25N3O2	303.195	3.73124	ESI+	[M+H]+	304.2→97.1	30	40		304.2→154.1	30	25
521	Voglibose	Drugs-Others	83480-29-9	C10H21NO7	267.132	8.02061	ESI+	[M+H]+	268.1→92.1	80	30		268.1→250.1	50	25
522	Dyphylline	Drugs-Others	479-18-5	C10H14N4O4	254.102	14.6078	ESI+	[M+H]+	255.1→181.1	50	25		-	-	-
523	Glyburide	Drugs-Others		C23H28ClN3O5S	493.144	14.617	ESI-	[M-H]-	492.1→170	-50	-35		-	-	-
524	N-Desmethylsildenafil	Drugs-Others	139755-82-1	C21H28N6O4S	460.189	14.2134	ESI-	[M-H]-	459.2→282.1	-40	-55		-	-	-
525	Nimodipine	Drugs-Others	66085-59-4	C21H26N2O7	418.174	15.7644	ESI-	[M-H]-	417.2→224.1	-40	-30		-	-	-
526	4,4'-Methylenebis(2-chloroaniline)	Pollutants-Dyes	101-14-4	C13H12Cl2N2	266.038	14.5	ESI+	[M+H]+	267→231.1	20	30		267→195.1	60	45
527	Acridine orange	Pollutants-Dyes	10127-02-3	C17H19N3	265.158	12.9566	ESI+	[M+H]+	266.2→250.1	90	35		266.2→234.1	90	75
528	Auramine O	Pollutants-Dyes	2465-27-2	C17H21N3	267.174	13.0837	ESI+	[M+H]+	268.2→147.1	50	35		268.2→252.1	70	45
529	Diphenylamine	Pollutants-Dyes	122-39-4	C12H11N	169.089	15.1599	ESI+	[M+H]+	170.1→93.1	20	35		170.1→92	70	25
530	Ethyl 4-dimethylaminobenzoate	Pollutants-Dyes	10287-53-3	C11H15NO2	193.11	14.8365	ESI+	[M+H]+	194.1→134.1	20	40		194.1→151.1	20	30
531	Leucocrystal violet	Pollutants-Dyes	603-48-5	C25H31N3	373.252	16.0685	ESI+	[M+H]+	374.3→358.2	60	45		374.3→238.1	80	40
532	Michler's ketone	Pollutants-Dyes	90-94-8	C17H20N2O	268.158	15.4987	ESI+	[M+H]+	269.2→148.1	140	30		269.2→120.1	60	45
533	o-Aminoazotoluene	Pollutants-Dyes	97-56-3	C14H15N3	225.127	16.1651	ESI+	[M+H]+	226.1→106.1	40	25		226.1→121.1	70	35
534	RhodamineB	Pollutants-Dyes	1326-03-0	C28H31N2O3+	443.233	14.9346	ESI+	M+	443.2→399.2	30	75		443.2→413.2	90	55
535	SudanI	Pollutants-Dyes	842-07-9	C16H12N2O	248.095	18.3991	ESI+	[M+H]+	249.1→156	20	20		249.1→128	30	40
536	3,5-Dichloroaniline	Pollutants-Dyes	626-43-7	C6H5Cl2N	160.98	14.5661	ESI+	[M+H]+	162→127	50	35		-	-	-
537	4,4'-Dichlorobenzophenone	Pollutants-Dyes	90-98-2	C13H8Cl2O	249.995	16.945	ESI+	[M+H]+	251→139	20	25		-	-	-
538	Naphthol Yellow S	Pollutants-Dyes	846-70-8	C10H6N2O8S	313.984	3.48092	ESI-	[M-H]-	313→233	-70	-30		-	-	-
539	Bisphenol A bis(diphenyl phosphate)	Pollutants-Organic Flame Retardants	5945-33-5	C39H34O8P2	692.173	19.5687	ESI+	[M+NH4]+	710.2→693.2	30	35		710.2→367.1	20	60
540	Dibutyl phosphate	Pollutants-Organic Flame Retardants	107-66-4	C8H19O4P	210.102	13.1425	ESI-	[M-H]-	209.1→153	-50	-19		209.1→79	-50	-45
541	Diphenyl phosphate	Pollutants-Organic Flame Retardants	838-85-7	C12H11O4P	250.039	12.8465	ESI-	[M-H]-	249→93	-80	-45		249→155	-80	-30
542	tert-Butylphenyl diphenyl phosphate	Pollutants-Organic Flame Retardants	56803-37-3	C22H23O4P	382.133	18.3877	ESI+	[M+H]+	383.1→327.1	150	40		383.1→215	60	50
543	Tris(2-isopropylphenyl) phosphate	Pollutants-Organic Flame Retardants	64532-95-2	C27H33O4P	452.212	19.6932	ESI+	[M+H]+	453.2→327.1	60	45		453.2→369.1	100	30
544	(2-nitro-phenyl)-[1,4]benzoquinone	Pollutants-Others	105946-79-0	C19H24N2O4	344.174	12.7226	ESI+	[M+H]+	345.2→150.1	30	30		345.2→118.1	20	45
545	2,4-Diethyl-9H-thioxanthen-9-one	Pollutants-Others	82799-44-8	C17H16OS	268.092	18.8121	ESI+	[M+H]+	269.1→241.1	50	35		269.1→213	40	40
546	4,4'-Bis(diethylamino)benzophenone	Pollutants-Others	90-93-7	C21H28N2O	324.22	17.7086	ESI+	[M+H]+	325.2→176.1	150	50		325.2→133.1	60	60
547	4,4'-Thiodianiline	Pollutants-Others	139-65-1	C12H12N2S	216.072	12.4234	ESI+	[M+H]+	217.1→124	30	30		217.1→199	60	35
548	4-Benzoylbiphenyl	Pollutants-Others	2128-93-0	C19H14O	258.104	17.3183	ESI+	[M+H]+	259.1→105	40	30		259.1→181.1	40	30
549	Diethyltoluamide	Pollutants-Others	134-62-3	C12H17NO	191.131	13.8471	ESI+	[M+H]+	192.1→119	70	25		192.1→91.1	50	45
550	Iminoctadinetris	Pollutants-Others	169202-06-6	C18H41N7	355.342	7.29062	ESI+	[M+H]+	356.3→297.3	30	40		356.3→314.3	10	30
551	Leucomalachite green	Pollutants-Others	129-73-7	C23H26N2	330.21	17.3038	ESI+	[M+H]+	331.2→239.2	60	45		331.2→316.2	40	30
552	Mono(2-ethyl-5-oxohexyl)phthalate	Pollutants-Others	40321-98-0	C16H20O5	292.131	12.5461	ESI-	[M-H]-	291.1→77.1	-98	-40		291.1→121.1	-98	-22
553	Monoethyl phthalate	Pollutants-Others	2306-33-4	C10H10O4	194.058	12.7086	ESI+	[M+H]+	195.1→149	40	25		195.1→121	20	40
554	morpholinopropiophenone	Pollutants-Others	71868-10-5	C15H21NO2S	279.129	14.1892	ESI+	[M+H]+	280.1→165.1	40	30		280.1→117.1	30	50
555	MQCA	Pollutants-Others	74003-63-7	C10H8N2O2	188.059	3.76597	ESI+	[M+H]+	189.1→143.1	20	25		189.1→102	20	45
556	Benzyl 4-hydroxybenzoate	Pollutants-Others	94-18-8	C14H12O3	228.079	14.8589	ESI-	[M-H]-	227.1→136	-30	-20		-	-	-
557	Bis(2-butoxyethyl) phthalate	Pollutants-Others	117-83-9	C20H30O6	366.204	17.0835	ESI+	[M+H]+	367.2→101.1	50	20		-	-	-
558	Blasticidine S	Pollutants-Others	2079-00-7	C17H26N8O5	422.203	8.78692	ESI+	[M+H]+	423.2→312.2	60	25		-	-	-
559	1H,1H,2H,2H-Perfluorodecanesulfonic acid	Pollutants-PFASs	39108-34-4	C10H5F17O3S	527.969	17.0478	ESI-	[M-H]-	527→507	-50	-35		527→486.9	-50	-45
560	1H,1H,2H,2H-Perfluorohexanesulfonic acid	Pollutants-PFASs	757124-72-4	C6H5F9O3S	327.982	13.5993	ESI-	[M-H]-	327→307	-50	-25		327→287	-40	-35
561	Bis[2-(perfluorohexyl)ethyl] phosphate	Pollutants-PFASs	57677-95-9	C16H9F26O4P	789.982	19.0959	ESI-	[M-H]-	789→443	-20	-31		789→97	-20	-76
562	Chloro-3-oxa-perfluorononanesulfonic acid	Pollutants-PFASs	756426-58-1	C8HClF16O4S	531.903	16.7129	ESI-	[M-H]-	530.9→350.9	-60	-37		530.9→35	-60	-90
563	Fenpiclonil	Pollutants-PFASs	74738-17-3	C11H6Cl2N2	235.991	14.2217	ESI+	[M+H]+	237→202	70	30		237→201	40	25
564	Pentacosafluorotridecanoic acid	Pollutants-PFASs	72629-94-8	C13HF25O2	663.958	18.748	ESI-	[M-H]-	663→169	-50	-30		663→219	-30	-30
565	Perfluorobutanesulfonic acid	Pollutants-PFASs	375-73-5	C4HF9O3S	299.95	12.9701	ESI-	[M-H]-	298.9→169	-60	-30		298.9→119	-70	-30
566	Perfluorodecanoic acid	Pollutants-PFASs	335-76-2	C10HF19O2	513.967	17.0308	ESI-	[M-H]-	513→219	-20	-25		513→269	-30	-25
567	Perfluorododecanoic acid	Pollutants-PFASs	307-55-1	C12HF23O2	613.961	18.2526	ESI-	[M-H]-	613→269	-30	-30		613→169	-30	-40
568	Perfluoroheptanesulfonic acid	Pollutants-PFASs	375-92-8	C7HF15O3S	449.941	15.5012	ESI-	[M-H]-	448.9→169	-120	-45		448.9→119	-100	-45
569	Perfluoroheptanoic acid	Pollutants-PFASs	375-85-9	C7HF13O2	363.977	14.5237	ESI-	[M-H]-	363→169	-30	-25		363→119	-20	-40
570	Perfluorohexanesulfonate (PFHxS)	Pollutants-PFASs	355-46-4	C6HF13O3S	399.944	14.5986	ESI-	[M-H]-	398.9→80	-50	-85		398.9→99	-50	-65
571	Perfluorononanesulfonic acid sodium	Pollutants-PFASs	68259-12-1	C9HF19O3S	549.934	17.0412	ESI-	[M-H]-	548.9→80	-110	-115		548.9→99	-110	-100
572	Perfluorononanoic acid	Pollutants-PFASs	375-95-1	C9HF17O2	463.971	16.285	ESI-	[M-H]-	463→219	-60	-25		463→169	-20	-30
573	Perfluorooctanesulfonate (PFOS)	Pollutants-PFASs	1763-23-1	C8HF17O3S	499.937	16.3197	ESI-	[M-H]-	498.9→80.1	-100	-100		498.9→99	-100	-80
574	Perfluorooctanoic acid	Pollutants-PFASs	335-67-1	C8HF15O2	413.974	15.45	ESI-	[M-H]-	413→169	-20	-25		413→219	-40	-20
575	Perfluorotetradecanoic acid	Pollutants-PFASs	376-06-7	C14HF27O2	713.955	19.1864	ESI-	[M-H]-	712.9→219	-20	-35		712.9→319	-30	-30
576	Perfluoroundecanoic acid	Pollutants-PFASs	2058-94-8	C11HF21O2	563.964	17.6802	ESI-	[M-H]-	563→269	-20	-25		563→169	-40	-30
577	PFHxA	Pollutants-PFASs	307-24-4	C6HF11O2	313.98	13.646	ESI-	[M-H]-	313→269	-50	-13		313→119	-50	-28
578	perfluoro-n-pentanoic acid-1 (PFPeA)	Pollutants-PFASs	2706-90-3	C5HF9O2	263.983	12.9541	ESI-	[M-H]-	263→219	-50	-12		-	-	-
579	Bisphenol AF	Pollutants-Phenols	1478-61-1	C15H10F6O2	336.058	15.4059	ESI-	[M-H]-	335.1→265	-60	-30		335.1→197	-60	-50
580	Bisphenol M	Pollutants-Phenols	13595-25-0	C24H26O2	346.193	17.7247	ESI-	[M-H]-	345.2→330	-140	-37		345.2→133	-140	-50
581	Bisphenol S	Pollutants-Phenols	80-09-1	C12H10O4S	250.03	11.996	ESI-	[M-H]-	249→108	-100	-37		249→156	-100	-37
582	4,6-Dinitro-O-cresol	Pollutants-Phenols	534-52-1	C7H6N2O5	198.028	12.2403	ESI-	[M-H]-	197→109	-30	-30		-	-	-
583	Bis(4-hydroxyphenyl)methane	Pollutants-Phenols	620-92-8	C13H12O2	200.084	13.2246	ESI-	[M-H]-	199.1→93	-80	-29		-	-	-
584	Bisphenol AP	Pollutants-Phenols	1571-75-1	C20H18O2	290.131	15.4758	ESI-	[M-H]-	289.1→274.1	-90	-30		-	-	-
585	Dinoseb	Pollutants-Phenols	88-85-7	C10H12N2O5	240.075	13.6589	ESI-	[M-H]-	239.1→207	-50	-35		-	-	-
586	2,2’,4,4’-Tetrahydroxybenzophenone	Pollutants-UV Absorbers	131-55-5	C13H10O5	246.053	12.2981	ESI-	[M-H]-	245→135	-20	-20		245→109	-20	-30
587	2,2'-Dihydroxy-4,4'-dimethoxybenzophenone	Pollutants-UV Absorbers	131-54-4	C15H14O5	274.084	15.242	ESI+	[M+H]+	275.1→151	20	25		275.1→108	40	60
588	2-Ethylhexyl 4-(dimethylamino)benzoate	Pollutants-UV Absorbers	21245-02-3	C17H27NO2	277.204	19.002	ESI+	[M+H]+	278.2→166.1	60	30		278.2→151.1	60	40
589	2-Hydroxy-4-methoxybenzophenone	Pollutants-UV Absorbers	131-57-7	C14H12O3	228.079	15.6364	ESI+	[M+H]+	229.1→151	30	25		229.1→105	40	25
590	2-Hydroxy-4-methoxybenzophenone-5-sulfonic acid	Pollutants-UV Absorbers	4065-45-6	C14H12O6S	308.035	12.4761	ESI-	[M-H]-	307→211	-80	-50		307→227.1	-90	-30
591	3-(4-Methylbenzylidene)camphor	Pollutants-UV Absorbers	36861-47-9	C18H22O	254.167	17.8174	ESI+	[M+H]+	255.2→212.1	30	30		255.2→105.1	30	40
592	4-Isopropylthioxanthone	Pollutants-UV Absorbers	83846-86-0	C16H14OS	254.077	17.9756	ESI+	[M+H]+	255.1→213	30	30		255.1→184	40	55
593	Benzophenone	Pollutants-UV Absorbers	119-61-9	C13H10O	182.073	14.6806	ESI+	[M+H]+	183.1→105	20	20		183.1→77	30	40
594	Butyl methoxydibenzoylmethane	Pollutants-UV Absorbers	70356-09-1	C20H22O3	310.157	19.0925	ESI+	[M+H]+	311.2→161.1	40	35		311.2→135	40	35
595	Heptyl 4-hydroxybenzoate	Pollutants-UV Absorbers	1085-12-7	C14H20O3	236.141	17.7383	ESI-	[M-H]-	235.1→136	-30	-25		235.1→137	-30	-25
596	2,4-Dihydroxybenzophenone	Pollutants-UV Absorbers	131-56-6	C13H10O3	214.063	13.2788	ESI-	[M-H]-	213.1→135	-40	-25		-	-	-
597	3,5-Di-tert-butyl-4-hydroxybenzyl alcohol	Pollutants-UV Absorbers	88-26-6	C15H24O2	236.178	16.1642	ESI-	[M-H]-	235.2→160.1	-50	-35		-	-	-
598	Dioxybenzone	Pollutants-UV Absorbers	131-53-3	C14H12O4	244.074	14.8672	ESI-	[M-H]-	243.1→108	-30	-45		-	-	-

## Sheet: Supplementary Data 5
Supplementary Data 5. Method validation results of serum-spiked isotopically labeled metabolites.
ID	Name	R2	LLOQ (ng/mL)	ULOQ (ng/mL)	Spiked concentration (ng/mL)				Accuracy								Extraction rescovery
					L	M	H		LLOQ	L	L-RSD (%)	M	M-RSD (%)	H	H-RSD (%)		L	L-RSD (%)	M	M-RSD (%)	H	H-RSD (%)
1	Alanine-d3	0.998273	46.033	46033	460.33	2301.65	11508.2		106.954	104.3±1.66	1.59	105.42±2.4	2.28	101.87±1.14	1.12		87.99±2.77	3.15	93.22±1.4	1.5	101.12±3.07	3.03
2	Choline-d4	0.997729	10.7125	10712.5	428.499	2142.5	10712.5		86.6	105.05±0.38	0.36	107.16±0.72	0.67	96.35±1.02	1.06		91.61±3.69	4.03	91.22±1.01	1.1	106.51±2.05	1.92
3	4-Aminobutyric acid-d6	0.998215	109.1	10910	436.402	2182.01	10910		86.3882	102.37±1.99	1.95	105.2±3.12	2.96	98.28±1.64	1.67		87.19±4.97	5.7	84.97±3.85	4.54	88.84±11.52	12.97
4	4-Hydroxyproline-d3	0.998501	53.6306	13407.7	536.306	2681.53	13407.7		114.83	94.61±1.29	1.36	103.41±3.83	3.71	104.33±2.79	2.67		88.86±1.17	1.32	93.22±4.65	4.99	97.5±3.92	4.02
5	Leucine-d3	0.999073	13.4113	13411.3	536.454	2682.27	13411.3		108.697	103±2.65	2.58	106.26±1.55	1.46	101.6±2.16	2.13		85.68±7.17	8.37	87.48±2.35	2.69	109.35±1.24	1.13
6	Ornithine-13C5	0.995057	274.213	27421.3	2742.13	13710.7	27421.3		80.9817	116.98±1.13	0.96	107.14±1.93	1.8	96.76±0.66	0.69		80.47±0.84	1.04	88.91±1.43	1.61	103.14±1.71	1.66
7	Glutamic acid-d3	0.996938	30.0144	60028.8	600.288	3001.44	15007.2		92.911	101.63±1.77	1.75	113.75±0.97	0.86	111.51±2.52	2.26		86.69±3.39	3.91	92.8±1.16	1.25	105.28±2.77	2.63
8	Lysine-d4	0.994638	300.261	30026.1	3002.61	15013.1	30026.1		93.093	105.96±1.53	1.45	100.72±2.14	2.12	83.11±1.42	1.71		87.68±2.34	2.67	109.37±1.24	1.13	116.71±1.22	1.05
9	Phenylalanine-d5	0.997859	6.80441	17011	170.11	3402.21	17011		95.0885	102.17±3.04	2.98	107.9±2.29	2.13	100.47±3.16	3.15		80.91±2.25	2.79	86.99±2.04	2.34	109.06±1.53	1.4
10	Tryptophan-d5	0.996054	20.9121	20912.1	2091.21	10456.1	20912.1		99.2826	104.31±3.04	2.91	109.54±3.69	3.37	91.63±2.14	2.33		80.55±4.06	5.03	94.18±2.69	2.85	113.54±1.73	1.52
11	Carnitine C4:0-d3	0.998618	4.68331	4683.31	117.083	468.331	2341.65		100.333	98.59±1.45	1.47	96.43±0.94	0.98	91.21±0.73	0.8		82.11±1.86	2.27	83.61±2.12	2.53	80.63±1.89	2.35
12	Carnitine C6:0-d3	0.999906	1.31099	524.394	13.1099	131.099	524.394		111.509	95.56±1.9	1.99	96.37±2.17	2.25	89.22±0.99	1.11		84.83±3.2	3.77	93.48±4.95	5.3	94.92±1.77	1.86
13	Carnitine C10:0-d3	0.996766	0.63652	3182.6	159.13	636.52	3182.6		105.035	101.28±1.34	1.33	96.44±1.28	1.33	88.12±1.17	1.32		88.2±0.41	0.47	87.66±2.65	3.03	90.29±2.79	3.1
14	Carnitine C12:0-d3	0.995373	0.692582	3462.91	173.146	692.582	3462.91		102.268	104.98±1.36	1.3	99.47±2.43	2.45	89.7±1.18	1.31		88.2±0.9	1.03	88.08±3.57	4.05	94.16±3.09	3.28
15	CDCA-d4	0.999207	9.90794	990.794	9.90794	99.0794	396.318		113.804	116.37±5.44	4.67	90.29±0.96	1.07	93.89±1.36	1.45		104.08±7.38	7.09	96.43±1.16	1.2	90.94±1.93	2.12
16	Carnitine C16:0-d3	0.997093	1.50882	3017.65	15.0882	150.882	3017.65		114.762	103.24±7.16	6.93	98.21±3.24	3.3	94.01±1.89	2.01		96.27±4.5	4.67	82.65±11.62	14.06	108.74±4	3.68
17	LPE 13:0	0.999012	15.4214	3084.29	15.4214	154.214	3084.29		118.889	130.1±3.24	2.49	91.69±1.92	2.1	92.68±1.2	1.3		97.19±2.12	2.18	84.99±6.36	7.48	86.56±1.96	2.27
18	LPC 19:0	0.996368	134.345	26869	134.345	537.379	13434.5		112.95	108.49±2.14	1.98	68.91±2.59	3.76	81.17±5.04	6.21		129.5±2.58	2	98.61±7.45	7.55	78.2±6.39	8.17
19	Guanosine-13C,15N2	0.994514	21.4567	10728.3	107.283	429.134	2145.67		83.9639	98.27±3.02	3.07	102.02±6.06	5.94	114.15±4.66	4.09		98.35±4.3	4.37	95.57±8.92	9.34	100.85±6.43	6.37
20	Hippuric acid-d5	0.99919	36.8179	18409	368.179	1840.9	9204.48		95.7314	96.68±5.65	5.84	109.71±6.75	6.15	107.24±4.93	4.6		99.32±6.63	6.68	97.8±14.11	14.43	100.5±5.19	5.17
21	SM d18:1/12:0	0.993231	161.626	6465.05	161.626	646.505	3232.52		95.0433	87.57±1.08	1.24	65.89±6.96	10.57	77.49±2.77	3.58		113.82±7.58	6.66	80.82±2.97	3.68	102.03±9.5	9.31

## Sheet: Supplementary Data 6
Supplementary Data 6. Precision, extraction rescovery and limitation of detection of serum-spiked chemical exposures
ID	Name	LOD (ng/mL)	Intraday precision				Interday precision				Extraction rescovery				Extraction rescovery RSD (%)
			L (0.5 ng/mL)	M (5 ng/mL)	H (50 ng/mL)		L (0.5 ng/mL)	M (5 ng/mL)	H (50 ng/mL)		L (0.5 ng/mL)	M (5 ng/mL)	H (50 ng/mL)		L (0.5 ng/mL)	M (5 ng/mL)	H (50 ng/mL)
1	2,4,5-Trichlorophenoxyacetic acid	0.5	3.23503	7.0244	2.98256		3.95538	6.58104	4.87404		83.35±3.13	90.77±10.92	90.77±2.9		3.76	12.03	2.96
2	2-Hydroxy-4-methoxybenzophenone-5-sulfonic acid	0.5	9.33448	5.62423	8.56033		9.50865	5.8221	8.53265		85.08±7.46	94.23±6.96	94.23±12.82		8.77	7.39	11.65
3	3,5-Di-tert-butyl-4-hydroxybenzyl alcohol	0.1	4.2748	4.6393	2.81714		9.72751	11.25	7.35731		80.54±5.18	99.35±7.33	99.35±3.59		6.43	7.38	3.33
4	3-Chloro-7-hydroxy-4-methylcoumarin	0.05	3.27739	7.70385	4.46139		3.23702	7.44188	4.82343		91.39±5.13	92±9.63	92±2.52		5.62	10.47	2.63
5	4,6-Dinitro-O-cresol	0.01	7.40956	4.33262	3.08812		8.48855	7.51893	6.98261		110.62±8.61	97.74±5.74	97.74±4.27		7.78	5.87	4.39
6	Bis[2-(perfluorohexyl)ethyl] phosphate	0.05	3.89903	5.10339	2.94206		5.27683	5.28109	4.50511		112.25±7.14	116.07±8.26	116.07±3.04		6.36	7.11	2.84
7	Bisphenol AF	0.01	5.52902	2.37383	2.21338		7.90891	3.16882	2.9919		85.84±12.38	95.9±4.56	95.9±3.22		14.42	4.75	3.15
8	Bisphenol S	0.005	4.43537	3.75445	1.77601		4.50397	4.7835	3.05322		98.68±2.52	91.62±5.05	91.62±1.39		2.56	5.51	1.38
9	Bromacil	0.1	4.0911	7.06784	3.46682		4.72722	6.3283	5.08945		88.29±6.1	90.8±10.19	90.8±2.82		6.91	11.22	2.9
10	Butylparaben	0.1	2.82137	10.2316	2.1515		2.80288	9.40601	6.32213		84.75±2.76	92.58±17.86	92.58±2.28		3.26	19.29	2.23
11	Chlorantraniliprole	0.005	10.9776	3.17183	2.68586		9.0428	6.43055	6.43113		77.87±15.22	92.03±3.07	92.03±1.95		19.55	3.34	1.87
12	Chloro-3-oxa-perfluorononanesulfonic acid	0.005	3.23069	3.08507	1.74074		3.86845	3.42847	2.34763		107.61±5.48	105.51±5.35	105.51±3.62		5.09	5.07	3.46
13	Chlorothalonil	0.5	4.44581	8.86038	6.29905		5.01978	9.98364	8.87548		110.46±6.94	112.25±10.4	112.25±7.82		6.29	9.26	8
14	Cyclamic acid	0.05	5.74189	11.0744	12.1128		4.87205	8.84521	9.08485		111.5±6.6	110.74±20.9	110.74±19.01		5.92	18.87	17.59
15	Dimefuron	0.5	4.08409	5.94492	4.48752		3.9228	4.93341	5.60063		96.39±3.23	94.06±4.92	94.06±7.54		3.35	5.24	7.37
16	Dinoseb	0.1	2.66957	4.00256	3.27107		6.08579	6.7895	8.26691		88.3±1.95	90.38±2.63	90.38±1.94		2.21	2.92	1.93
17	Dinoterb	0.01	3.37998	3.60325	4.31253		4.60227	7.42319	8.61456		91.04±4.01	90.18±3.94	90.18±5.27		4.4	4.37	5.52
18	Estrone	0.05	5.15774	5.55677	2.53953		5.31088	5.66814	3.97505		81.79±6.86	90.31±8.24	90.31±2.56		8.39	9.13	2.6
19	Ethylparaben	0.1	7.63162	8.44103	3.91343		7.37832	7.60736	5.44264		78.96±7.36	90.77±11.06	90.77±5.21		9.33	12.19	5.23
20	Fipronil	0.005	2.56714	3.85224	1.8678		4.22305	3.85728	2.75974		85.59±4.15	125.93±3.91	125.93±2.22		4.85	3.11	2.03
21	Fipronil Desulfinyl	0.005	3.84843	3.71834	3.12497		5.86745	3.34705	3.09229		87.85±5.74	96.04±4.97	96.04±5.24		6.53	5.17	5.12
22	Fipronil sulfone	0.005	1.95171	2.54583	1.83702		2.07056	3.16536	1.94422		97±2.66	108.75±4.78	108.75±1.84		2.74	4.39	1.87
23	Fipronil-sulfide	0.005	2.89661	2.85057	1.9456		3.17529	2.61777	2.07828		90.14±4.29	97.2±3.98	97.2±3.2		4.76	4.1	3.1
24	Flunixin	0.005	5.98061	3.93988	3.32977		7.25323	4.62062	4.02044		84.78±10.02	90.56±4.78	90.56±2.81		11.81	5.28	2.76
25	Fluxapyroxad	0.005	5.82902	3.98133	2.32543		5.31228	3.63202	2.8813		93.6±4.15	90.21±3.13	90.21±2.93		4.43	3.47	2.92
26	Genistein	0.1	4.32549	5.37385	3.18276		7.17627	5.21735	3.54627		109.77±4.13	79.22±6.98	79.22±3.43		3.77	8.81	3.55
27	Glyburide	0.01	6.17666	4.88363	3.60381		7.02408	4.95493	3.8793		93.7±7.08	87.59±6.65	87.59±5.98		7.55	7.59	5.7
28	Halosulfuron-methyl	0.01	5.18267	4.8226	5.99089		6.58441	5.4021	5.31784		96.01±9.31	99.18±6.09	99.18±4.56		9.7	6.14	4.57
29	Isobutyl 4-hydroxybenzoate	0.1	6.16615	6.42465	2.27083		5.5485	10.7323	4.57505		97.42±3.21	94.77±1.71	94.77±0.85		3.29	1.81	0.84
30	Isocarbophos	0.01	5.21825	4.38114	3.57602		5.77628	5.40195	4.64515		99.34±7.91	91.98±3.58	91.98±1.99		7.96	3.89	1.98
31	Isoxaflutole	0.05	8.5836	6.98595	3.13711		8.50812	7.81155	3.7565		99.98±3.34	90.41±11.97	90.41±5.6		3.34	13.24	5.6
32	Lufenuron	0.01	7.61657	7.17774	4.43331		8.73211	7.22305	5.20819		87.03±7.28	118.61±8.91	118.61±9.18		8.37	7.51	8.96
33	Mecoprop	0.5	3.97922	9.51467	6.60863		3.88491	8.86915	5.4113		102.04±8.04	91.04±15.77	91.04±8.29		7.88	17.32	8.72
34	Mono(2-ethyl-5-oxohexyl)phthalate	0.1	3.56331	5.36511	3.12274		4.3366	6.75073	5.02628		84.17±3.72	92.12±6.46	92.12±3.55		4.42	7.01	3.58
35	Nicarbazin	0.05	3.81057	5.22861	3.34388		3.60075	5.33316	4.51483		76.38±1.18	95.62±7.2	95.62±4.89		1.55	7.53	4.65
36	Pentacosafluorotridecanoic acid	0.05	9.27208	7.86642	7.20999		11.1973	9.33769	8.79606		92.98±7.34	89.52±9.66	89.52±15.65		7.9	10.8	15.71
37	Perfluorodecanoic acid	0.01	6.22557	2.84008	2.07189		4.90505	2.87775	2.83035		108.41±7.12	101.31±3.17	101.31±4.02		6.57	3.13	3.89
38	Perfluorododecanoic acid	0.01	5.93254	4.74766	4.10145		6.88759	4.4275	4.36536		89±9.35	99.24±8.81	99.24±6.39		10.5	8.87	6.22
39	Perfluoroheptanesulfonic acid	0.05	8.17079	4.01151	2.20041		6.38918	3.88559	3.01995		96.4±4	96.13±3.9	96.13±2.67		4.15	4.06	2.57
40	Perfluoroheptanoic acid	0.01	7.88354	3.62887	1.99623		8.76609	5.17718	3.84271		97.73±10.58	91.82±5.78	91.82±2.17		10.83	6.3	2.11
41	Perfluorohexanesulfonate (PFHxS)	0.05	6.524	4.16895	2.96839		5.36479	4.17239	3.13442		96.66±8.47	94.06±5.6	94.06±3.63		8.77	5.96	3.56
42	Perfluorononanoic acid	0.01	3.28266	4.77686	0.978398		3.31802	4.25383	2.61635		106.61±4.55	91.02±6.88	91.02±2.12		4.27	7.56	2.05
43	Perfluorooctanesulfonate (PFOS)	0.05	2.44607	6.06334	2.01516		4.40292	4.797	4.08699		103.46±3.52	119.43±6.71	119.43±3.87		3.4	5.62	3.6
44	Perfluorooctanoic acid	0.05	5.76744	3.588	2.08743		5.54024	3.61409	3.01143		108.58±1.27	104.18±6.28	104.18±4.19		1.17	6.03	4.02
45	Perfluoroundecanoic acid	0.01	7.41148	4.33407	2.9048		7.27352	3.93892	3.11444		107.05±15.24	103.21±6.48	103.21±3.56		14.23	6.28	3.33
46	Sulfanitran	0.01	5.00527	4.94312	3.47878		5.48542	6.90651	4.47352		80.46±3.81	91±5.23	91±4.6		4.74	5.75	4.54
47	Sulfoxaflor	0.01	4.24707	4.36971	2.78486		6.84437	5.83587	3.88767		88.56±6.88	93.97±5.88	93.97±4.29		7.77	6.26	4.26
48	Tolbutamide	0.01	2.88719	3.14627	2.74893		4.8631	4.10737	3.27676		87.38±6.17	92.27±4.04	92.27±2.29		7.06	4.38	2.35
49	(4-Chloro-2-methylphenoxy)acetic acid	1	N/A	5.43061	4.13536		N/A	6.16171	4.36406		N/A	93.07±7.92	93.07±3.77		N/A	8.5	3.87
50	1H,1H,2H,2H-Perfluorodecanesulfonic acid	0.005	4.84903	3.25815	3.56546		6.37541	5.53201	3.55914		93.04±4.32	102.47±4.85	102.47±3.37		4.64	4.74	3.11
51	1H,1H,2H,2H-Perfluorohexanesulfonic acid	0.01	4.57498	3.97037	5.1996		5.2362	5.4243	5.45739		96±5.01	96.44±5.71	96.44±4.65		5.22	5.92	4.33
52	2,2’,4,4’-Tetrahydroxybenzophenone	0.005	5.04636	3.94801	2.63196		6.35994	6.15211	4.74515		87.37±2.09	81.19±4.49	81.19±1.9		2.39	5.53	2
53	2,4-Dichlorophenoxyacetic acid	0.5	3.28158	8.11021	4.1962		3.27896	8.50205	4.66765		88.91±4.36	93.45±9	93.45±5.13		4.9	9.63	5.31
54	2,4-Dihydroxybenzophenone	0.05	4.15976	6.28836	3.63925		4.94315	5.34901	4.17306		90.5±3.69	87.45±6.94	87.45±2.56		4.07	7.93	2.56
55	6-Benzylaminopurine	0.01	5.16618	4.28325	5.85193		7.94932	8.54589	5.94414		84.56±9.12	85.46±4.29	85.46±15.34		10.79	5.02	13.8
56	Acifluorfen	0.05	6.13034	4.32331	2.82615		6.77491	8.84002	3.48214		98.48±3.15	94.2±2.72	94.2±3		3.2	2.88	2.8
57	alpha-Zearalenol	0.1	6.66883	6.90238	5.38121		7.05114	7.36631	6.80675		88.12±7.49	89.59±15.8	89.59±4.8		8.5	17.63	4.9
58	Bentazone	0.005	3.09328	3.15043	2.14019		4.24352	4.69235	3.85847		89.62±4.56	94.65±5.36	94.65±2.99		5.09	5.67	3
59	Benzovindiflupyr	0.01	6.16424	3.87442	2.08925		6.49351	3.90654	2.46814		86.91±8.01	99.16±3.77	99.16±5.26		9.22	3.81	5.04
60	Benzyl 4-hydroxybenzoate	0.05	7.92186	6.07005	1.94126		9.31836	6.03628	3.84414		85.69±13.38	92.79±5.52	92.79±3.1		15.61	5.94	3.11
61	Bis(4-hydroxyphenyl)methane	1	N/A	5.93772	4.29824		N/A	6.012	7.27656		N/A	104.54±8.78	104.54±3.53		N/A	8.4	3.65
62	Bisphenol AP	0.1	4.21811	6.61418	4.08688		4.80724	6.75168	4.56156		85.03±3.57	98.03±6.12	98.03±11.49		4.2	6.24	10.92
63	Bisphenol M	0.05	4.56399	6.14257	4.86814		4.26403	5.65622	4.66391		82.68±4.23	98.7±9.5	98.7±7.4		5.12	9.63	7.05
64	Carprofen	0.1	3.73153	5.18584	4.87241		3.04212	7.9477	7.69636		89.22±2.48	92.12±2.8	92.12±4.6		2.78	3.04	4.6
65	Chloramphenicol	0.05	3.99037	3.88689	2.86496		4.37621	3.91178	4.29267		79.87±5.38	91.43±4.29	91.43±5.7		6.73	4.69	5.88
66	Chloroxuron	0.1	4.82715	5.536	2.48848		4.65829	5.16301	2.73825		99.08±5.24	92.2±8.32	92.2±2.51		5.28	9.03	2.47
67	Chromafenozide	0.01	5.59186	2.66379	2.84849		5.88305	3.69091	3.19232		93.42±7.22	91.03±1.66	91.03±3.41		7.73	1.82	3.36
68	Clodinafop	0.01	3.63847	5.81237	3.54468		5.38139	5.73765	3.55227		91.59±5.75	91.16±8.64	91.16±3.66		6.28	9.47	3.63
69	Clomeprop	0.05	3.17635	3.6996	2.94823		4.92858	4.46242	4.01447		85.66±4.11	97.82±4.14	97.82±4.62		4.8	4.24	4.58
70	Cyantraniliprole	0.005	4.06095	3.45892	4.07316		11.349	10.3212	8.68336		97.57±6.17	139.82±7.62	139.82±3.86		6.32	5.45	3.62
71	Dibutyl phosphate	0.5	5.27019	5.29831	6.70171		4.33326	7.16763	6.21352		99.34±5.68	101.41±7.54	101.41±5.7		5.72	7.44	5.32
72	Dichlorprop	0.05	8.84468	5.85825	3.71263		8.6028	6.40676	4.93748		87.3±11.95	88.98±7.86	88.98±4.61		13.69	8.83	4.68
73	Diethyl phosphate	0.5	5.90302	8.18774	4.55348		4.77397	9.05287	5.2645		93.59±5.71	94.59±2.09	94.59±2.96		6.1	2.21	2.79
74	Diflunisal	0.1	4.9528	2.9964	2.46554		5.85605	4.15193	5.16414		86.12±6.72	92.48±3.19	92.48±1.99		7.81	3.45	1.99
75	Dioxybenzone	0.1	6.9154	4.45847	4.40398		7.7959	7.07398	5.15059		80.08±2.1	85.8±1.57	85.8±2.82		2.62	1.83	3.13
76	Diphenyl phosphate	0.05	5.69577	5.69699	4.50799		9.65454	6.89118	4.97279		92.62±5.86	93.32±7.74	93.32±5.2		6.33	8.29	5.05
77	Ethiprole	0.005	7.27536	4.21207	3.47443		7.7446	4.31805	4.01238		94.36±4.02	95.23±4.4	95.23±5.12		4.26	4.62	5
78	Fenoprop	0.5	7.39729	4.34102	5.0407		6.95783	6.4025	6.72656		78.97±5.89	93.41±5.02	93.41±3.63		7.46	5.37	3.69
79	Flubendazole	0.01	9.99239	4.9179	3.16321		11.5497	9.10305	3.87394		82.08±7.5	89.62±5.82	89.62±2.54		9.14	6.49	2.46
80	Flubendiamide	0.001	4.46406	3.42651	2.62067		7.08442	4.40602	3.90771		89.16±5.07	93.41±7.16	93.41±0.46		5.69	7.66	0.46
81	Fluconazole	1	N/A	11.4382	8.91382		N/A	14.8897	14.372		N/A	97.19±9.32	97.19±20.72		N/A	9.59	15.48
82	Fludioxonil	0.01	4.6278	2.90973	2.49378		6.12956	3.72791	4.0988		89.14±5	94.4±1.46	94.4±3.28		5.61	1.55	3.2
83	Flufenamic acid	0.05	7.72768	5.84994	1.48118		8.37481	6.1024	3.45773		92.26±8.55	88.72±7.59	88.72±2.06		9.27	8.56	2.03
84	Fluometuron	0.01	5.6539	3.8882	3.58388		7.86487	6.0503	6.39851		92.39±11.48	86.73±3.12	86.73±3.33		12.43	3.6	3.18
85	Flusulfamide	0.01	1.91759	3.29523	2.35101		3.61774	3.0572	2.13556		89.43±2.41	92.5±4.11	92.5±3.09		2.69	4.44	3.06
86	Forchlorfenuron	0.005	3.43704	3.88238	2.71921		6.33148	5.00748	4.32254		88.65±2.85	91.79±3.85	91.79±3.63		3.22	4.19	3.73
87	Glibornuride	0.01	3.84664	4.20925	1.66863		7.53783	8.61662	9.05264		96.93±5.4	92.99±3.61	92.99±4.4		5.57	3.88	4.19
88	Glimepiride	0.05	3.7108	2.12749	2.18457		5.22893	3.86272	3.0237		87.13±4.75	92.74±2.72	92.74±6.19		5.45	2.93	5.9
89	Heptyl 4-hydroxybenzoate	0.05	5.06947	3.52266	2.84357		4.91053	4.28065	3.18959		101.77±5.96	97.93±2.73	97.93±7.06		5.86	2.79	7.08
90	Hydroxyhomosildenafil	0.005	7.8505	5.45244	2.70802		6.99407	6.32775	3.52603		93.94±8.86	96.45±4.8	96.45±1.42		9.43	4.98	1.37
91	Lenacil	0.1	8.45197	3.40699	4.07865		8.16622	4.17956	5.42975		92.67±10.43	91.99±3.14	91.99±4.92		11.25	3.41	4.8
92	MCPB	0.5	7.02464	7.47721	4.07948		6.68273	7.26628	5.31699		90.77±1.94	86.03±13.46	86.03±4.04		2.14	15.64	3.94
93	Metaflumizone	0.01	4.18751	6.97037	4.6819		4.47094	6.72915	4.66826		93.31±8.71	101.45±10.02	101.45±5.4		9.34	9.88	4.9
94	Methoxyfenozide	0.05	5.03802	3.65927	2.64468		7.03933	3.93448	3.86438		84.73±3.3	90.25±3.56	90.25±3.32		3.89	3.94	3.3
95	Monalide	0.05	5.34646	3.26664	3.47523		5.55138	6.20059	6.16157		97.15±5.99	88.22±5.87	88.22±5.08		6.17	6.65	5
96	N-Desmethylsildenafil	0.05	9.1784	4.3813	5.63836		14.8368	7.63936	12.3236		85.61±6.54	88.15±4.02	88.15±7.59		7.63	4.56	6.51
97	Neburon	0.05	5.93568	3.93363	2.48929		6.57517	3.58017	2.99835		90.93±7.56	91.07±5.09	91.07±2.64		8.32	5.59	2.56
98	Niflumic Acid	0.05	5.61899	3.36266	3.17624		4.95046	4.66881	4.89518		94.8±1.35	95.14±4.78	95.14±4.86		1.42	5.02	4.83
99	Nimodipine	0.1	4.18456	4.40337	3.81743		4.76541	5.02447	3.32487		87.25±6.62	90.01±4.42	90.01±3.02		7.58	4.91	2.95
100	Oryzalin	0.05	7.79421	5.68718	4.31153		8.36317	4.93217	3.73231		95.01±10.55	94.97±4.55	94.97±4.35		11.1	4.79	4.17
101	Perfluorobutanesulfonic acid	0.1	7.49424	5.52704	4.58207		6.98039	5.34328	4.83095		86.71±4.65	97.09±5.86	97.09±2		5.36	6.03	2.01
102	Perfluorononanesulfonic acid sodium	1	N/A	4.21308	3.37531		N/A	5.1353	3.48092		N/A	105.19±13.36	105.19±6.13		N/A	12.7	5.73
103	perfluoro-n-pentanoic acid-1 (PFPeA)	0.5	7.09766	6.57435	4.83004		6.51421	5.896	4.34727		97.01±4.83	90.25±8.08	90.25±5.55		4.98	8.95	5.51
104	Perfluorotetradecanoic acid	0.05	8.39405	10.8142	9.92048		9.46457	15.7224	13.541		88.07±9.48	85.36±15.6	85.36±14.81		10.77	18.28	16.2
105	PFHxA	0.1	7.02789	3.48038	2.66918		8.76077	4.0804	2.95366		88.73±7.28	91.13±6.32	91.13±3.11		8.2	6.93	3.04
106	Thidiazuron	0.01	7.29535	6.73673	4.52478		6.11287	6.67634	4.30098		74.91±6.05	90.79±8.55	90.79±6.79		8.08	9.41	7.79
107	Thifluzamide	0.01	5.32655	4.72484	2.39593		6.53637	4.16055	3.01534		88.45±4.21	88.81±7.5	88.81±2.73		4.76	8.44	2.67
108	Tolfenamic Acid	0.1	4.05938	3.25468	2.38534		4.46501	5.36313	5.6595		88.59±2.88	94.31±2.21	94.31±0.93		3.25	2.34	0.94
109	Triclabendazole	0.05	5.86369	4.24571	2.36874		6.4767	4.34406	3.24772		94.7±4.68	96.03±4.2	96.03±5.12		4.94	4.37	4.91
110	Triclosan	0.5	7.8583	9.72973	3.62716		6.92112	10.5549	4.15458		102.15±9.81	95.51±11.19	95.51±5.94		9.6	11.71	6.05
111	Triflusulfuron	0.01	6.42865	6.61147	7.37398		6.1629	7.7403	8.74405		100.17±13.95	93.04±8.9	93.04±14.33		13.93	9.56	12.43
112	Benalaxyl	0.001	3.26084	2.63334	1.89917		3.32493	2.47951	2.32545		92.22±0.81	97.95±3.63	109.17±3.14		0.88	3.71	2.88
113	Ethoprophos	0.01	5.3674	14.8059	4.75376		5.21621	15.1209	5.62614		60.45±0.97	73.31±5.08	102.65±4.85		1.6	6.92	4.72
114	Methoprotryne	0.005	6.60392	2.71584	2.01061		4.80777	2.71914	2.58696		88.99±1	95.67±3.63	102.84±2.35		1.13	3.8	2.28
115	Difloxacin hydrochloride	0.05	1.27694	2.05689	1.28948		4.49986	2.33176	1.62717		108.56±1.12	93.72±2.28	104.07±1.47		1.03	2.43	1.41
116	S-Metolachlor	0.005	7.76691	8.73693	2.02641		8.09871	10.2326	2.18629		74.28±1.2	86.97±7.92	97.66±1.95		1.62	9.11	2
117	Etrimfos	0.05	3.25146	15.9975	4.80098		7.13306	13.8547	3.48516		66.64±1.34	77.99±8.14	82.62±3.59		2.01	10.44	4.34
118	Atrazine	0.01	3.21936	2.28009	0.648425		2.70091	2.39238	1.15346		86.29±1.48	97.77±3.23	108.51±0.98		1.71	3.3	0.9
119	Acetochlor	0.05	4.06041	5.87178	3.27768		4.07619	6.83943	2.96018		82.41±1.55	85.35±8.42	96.84±1.13		1.88	9.86	1.17
120	Thiobencarb	0.05	6.30207	7.6568	3.1183		5.83785	7.55352	2.49354		77.91±1.57	86.16±5.17	85.28±1.37		2.01	6.01	1.61
121	Medroxyprogesterone acetate	0.05	12.4702	9.30967	6.20112		11.7334	6.78213	4.6393		92.96±1.59	93.09±7.59	102.27±4.53		1.71	8.15	4.43
122	Cadusafos	0.01	7.39201	17.4265	6.8799		7.83635	17.2836	8.97687		54.74±1.64	63.07±8.02	83.97±8.71		2.99	12.71	10.37
123	Isazofos	0.005	4.17605	3.61812	1.53795		3.96014	5.76951	2.30935		81.3±1.69	91.36±7.06	104.25±2.38		2.08	7.73	2.29
124	Fenpropidin	0.005	3.36606	9.1037	6.52514		3.52577	7.97555	5.23773		78.91±1.72	76.97±2.04	86.65±6.19		2.18	2.65	7.14
125	Flonicamid	0.005	3.54697	3.06406	1.73807		5.06732	3.03932	1.94174		84.6±1.8	94.32±5.42	103.11±2.83		2.13	5.75	2.75
126	Mefenacet	0.005	3.7039	3.24311	1.61079		3.52989	4.71786	2.60526		91.06±1.86	96.29±4.77	106.25±2.04		2.04	4.95	1.92
127	Methfuroxam	0.005	5.13351	3.14836	0.868317		4.27967	3.27467	1.68199		92.35±1.9	97.03±2.27	104.65±2.82		2.05	2.34	2.69
128	Noscapine	0.01	5.39998	6.62175	5.13972		8.61432	6.38368	4.73138		82.87±1.98	89.7±7.52	94.02±2.16		2.39	8.38	2.3
129	Dimethachlor	0.005	5.67993	6.60313	2.60121		5.55745	8.70652	2.41786		82.87±1.98	87.02±10.01	90.62±1.73		2.39	11.51	1.91
130	Hydroxyzine dihydrochloride	0.005	2.63601	7.94863	2.51009		3.58307	5.4797	2.66007		97.09±2	88.54±3.52	107.4±3.47		2.06	3.98	3.23
131	Diazinon	0.01	6.3347	16.5	5.93037		7.35795	15.8814	4.48346		63.48±2.08	71.03±10.43	87.46±4.56		3.27	14.69	5.21
132	Tripelennamine hydrochloride	0.01	7.02294	4.69438	2.51694		6.93823	5.32628	2.71784		84.86±2.09	86.07±3.47	101.15±2.17		2.46	4.03	2.14
133	Fenamiphos sulfone	0.001	4.89883	3.47245	2.09496		4.41405	3.69586	2.78514		88.53±2.1	96.46±2.37	105.4±1.91		2.38	2.46	1.81
134	Orbifloxacin	0.1	8.36498	5.72075	6.24353		14.0093	7.7962	11.0219		83.52±2.19	91.76±9.44	88.1±14.26		2.62	10.28	16.18
135	Fenoxanil	0.05	11.0053	15.8086	7.00897		14.4527	11.9813	6.12252		91.16±2.22	93.68±20.96	86.36±12.13		2.44	22.37	14.05
136	Terbutryn	0.005	4.81617	2.43524	2.35752		8.86038	5.61071	2.85655		86.68±2.22	92.51±3.7	99.05±1.89		2.57	4	1.91
137	Haloxyfop-P-methyl	0.01	2.34419	2.60462	1.19685		7.13944	6.20892	4.2974		90.85±2.27	96.39±6.01	100.52±0.89		2.5	6.23	0.88
138	Propaphos	0.005	8.86134	3.97545	6.28426		7.52968	3.2909	6.61559		89.18±2.3	98.99±2.66	105.83±6.65		2.58	2.69	6.28
139	Bromfenvinphos	0.005	5.50901	2.30689	1.79824		5.05859	2.85794	2.93432		87.34±2.34	95.07±4.76	99.37±1.57		2.68	5	1.58
140	Rabenzazole	0.005	2.78115	1.31991	1.52534		3.44709	2.07133	2.70217		93.31±2.35	98.65±3.03	107.13±2.33		2.52	3.07	2.18
141	Metformin	0.5	4.31913	2.20789	11.5157		5.9662	6.2509	7.45834		74.83±2.35	87.27±7.98	86.84±2.1		3.14	9.14	2.42
142	Lincomycin	0.005	1.46384	3.61814	3.71328		3.82833	9.73832	8.26106		81.56±2.4	98.82±4.96	89.64±3.26		2.94	5.02	3.63
143	Alprenolol	0.01	3.16815	4.39798	1.54633		4.30299	3.1826	1.67149		90.35±2.4	94.66±4.57	97.88±1.23		2.66	4.83	1.26
144	Moroxydine	0.01	8.98787	6.85791	5.00733		7.12782	5.41982	4.04122		82.3±2.45	92.11±5.07	84.2±2		2.98	5.51	2.37
145	Fensulfothion-Sulfone	0.005	7.60166	1.46809	2.95743		5.24368	3.06699	4.24297		87.75±2.47	105.26±3.46	107.37±4.81		2.81	3.29	4.48
146	Norfludiazepam	0.01	8.86592	3.3482	2.26763		9.07919	4.00355	2.81749		90.64±2.48	95.5±2.89	100.82±1.6		2.73	3.03	1.59
147	2,2'-Dihydroxy-4,4'-dimethoxybenzophenone	0.01	5.21953	2.46061	2.68491		5.47542	3.82033	2.35663		95.54±2.48	101.72±6.85	101.03±2.83		2.6	6.73	2.8
148	Phosmet-oxon	0.05	6.75569	8.60292	3.3835		6.42406	7.77738	3.94844		88.8±2.51	96.5±4.77	99.31±7.04		2.82	4.94	7.08
149	Ritodrine	0.05	4.75907	18.7957	4.04912		8.65274	16.4361	6.68267		90.35±2.51	84.62±6.55	87.09±5.16		2.78	7.74	5.92
150	Boscalid	0.01	5.4708	2.89135	2.47084		6.14217	3.04882	2.53862		96.09±2.54	101.78±3.86	98.34±3.32		2.65	3.79	3.37
151	Desmethyl Norflurazon	0.005	2.79347	3.25315	2.21589		2.71559	3.36159	4.1003		92.72±2.7	97.45±6.67	108.47±2.56		2.91	6.85	2.36
152	Pyriftalid	0.005	3.31927	2.9014	2.92991		5.11038	2.88136	2.8505		84.2±2.73	97.64±1.87	104.51±2.51		3.25	1.92	2.4
153	Penthiopyrad	0.001	4.28732	2.27184	0.557089		4.37505	3.20688	1.54626		96.83±2.79	95.94±2.4	109.14±3.08		2.88	2.51	2.82
154	Tralkoxidym	0.01	4.42143	3.71543	1.86977		3.98054	4.22613	3.39512		92.19±2.88	97.02±2.92	97.12±2.02		3.12	3.01	2.08
155	Carbamazepine	0.005	1.70713	2.55081	1.75282		3.68478	4.06833	2.36161		118.74±2.88	109.08±0.98	105.55±1.66		2.43	0.9	1.57
156	Pirimicarb	0.001	2.57054	3.32385	1.53527		5.71558	3.51392	1.66276		82.03±2.89	91.08±3.53	101.85±1.89		3.52	3.87	1.86
157	Enilconazole	0.01	3.83441	2.35818	1.52886		2.72374	2.18738	2.898		94.84±2.89	98.37±1.66	109.46±2.33		3.05	1.69	2.13
158	Fluopyram	0.001	5.65255	1.35084	0.989396		5.08342	4.17679	1.725		90±2.94	86.49±2.66	105.54±3.51		3.27	3.07	3.33
159	Carbofuran	0.005	3.21023	2.18234	1.85544		4.59411	1.79228	1.36126		87.3±2.96	102.89±1.87	108.52±0.91		3.39	1.82	0.84
160	Ciprofloxacin	0.5	2.86453	7.74431	4.10558		9.36705	10.5746	6.40051		88.46±3.05	80.81±3.28	89.57±7.07		3.45	4.06	7.9
161	2,6-Dichlorobenzamide	0.001	4.62275	2.77806	1.73689		4.8356	2.37199	2.02254		88±3.09	89.35±2.71	100.65±2.65		3.52	3.04	2.63
162	Diphenamid	0.005	5.41665	1.94296	1.34957		4.42828	2.56936	1.36076		87.34±3.12	100.63±2.17	108.62±1.27		3.57	2.16	1.17
163	Methabenzthiazuron	0.005	3.27424	1.7289	0.709616		3.26873	2.70217	1.74806		91.66±3.19	101.52±3.66	107.25±1.38		3.49	3.6	1.29
164	Acridine orange	0.01	6.69319	5.7518	5.437		5.50516	6.54427	4.07631		84.61±3.21	85.15±8.75	80.99±6.05		3.79	10.28	7.47
165	Aspon	0.01	7.46453	11.8552	10.5809		8.37434	10.536	8.60496		73.4±3.21	90.17±10.65	86.13±9		4.37	11.81	10.44
166	Pyridalyl	0.05	10.7661	5.74338	4.53847		8.47299	4.28229	7.22232		79.42±3.26	92.22±5.32	117.4±15.37		4.11	5.77	13.09
167	Metominostrobin	0.005	3.49712	3.95122	3.53591		3.2131	4.31056	3.31828		92.05±3.27	98.7±4.07	104.21±3.88		3.55	4.12	3.73
168	Mephosfolan	0.001	3.08912	3.73759	2.73154		3.28485	3.23435	2.3897		88.05±3.28	92.32±4.2	104.85±2.37		3.72	4.55	2.26
169	Hexythiazox	0.005	7.1437	5.49651	5.28605		5.69159	7.15043	7.76572		98.53±3.32	98.78±3.83	117.26±14		3.37	3.88	11.94
170	Acetil acid	0.05	9.68878	6.7775	3.6658		10.0101	6.53722	4.43294		90.36±3.36	100.4±5.1	89.98±5		3.72	5.08	5.56
171	Fenhexamid	0.005	4.87009	4.73277	1.37656		4.596	4.01619	2.83289		90.47±3.38	94.38±4.54	99.97±1.26		3.73	4.81	1.26
172	(2-nitro-phenyl)-[1,4]benzoquinone	0.01	9.39158	7.98715	9.13477		6.76701	6.24166	6.61934		93.81±3.38	84.6±6.56	95.42±6.02		3.61	7.76	6.31
173	RhodamineB	0.01	11.1764	3.85796	2.89383		8.43755	4.97448	4.37176		85.35±3.4	95.86±3.01	95±5.58		3.99	3.14	5.87
174	Cloquintocet - mexyl	0.005	3.40853	2.23607	2.29789		5.9829	6.44935	3.35875		101.06±3.42	107.13±4.42	103.93±3.9		3.38	4.13	3.76
175	Etaconazole	0.05	2.12748	4.71022	1.79137		2.80875	5.03499	3.29926		86.13±3.43	98.3±4.29	105.06±0.7		3.98	4.36	0.67
176	Codeine	0.1	6.04937	5.03532	1.19899		5.86661	8.38407	2.3058		92.3±3.44	102.71±7.31	66.68±1.81		3.72	7.11	2.71
177	Furalaxyl	0.005	5.4806	1.75334	1.02036		4.67395	3.59686	2.1979		89.97±3.5	96.17±4.85	103.62±1.54		3.89	5.04	1.49
178	Albendazole	0.01	4.79033	2.11571	1.77779		6.66542	2.46928	1.61702		83.99±3.54	100.36±2.97	108.47±1.42		4.21	2.96	1.31
179	Michler's ketone	0.005	3.70636	2.85685	1.41688		3.49495	3.87935	2.49312		92.56±3.55	97.52±3.78	108.37±2.04		3.83	3.88	1.89
180	morpholinopropiophenone	0.01	6.06988	1.40786	1.9449		6.37108	3.52533	2.34365		85.64±3.55	97.16±3.31	100.95±1.94		4.14	3.41	1.92
181	Atraton	0.01	10.3942	3.73372	1.90699		6.9354	2.85838	1.78195		85.09±3.56	89.84±4.1	102.52±2.16		4.18	4.56	2.1
182	Bisoprolol	0.005	3.45891	3.38762	2.8964		4.08985	3.00721	3.33242		86.88±3.56	87.26±3.7	96.32±6.41		4.1	4.24	6.65
183	Ipconazole	0.05	9.09012	4.01272	2.46026		14.3816	4.45876	3.3516		96.3±3.58	99.98±3.65	105.62±3.28		3.71	3.65	3.11
184	Leucocrystal violet	0.05	3.50002	5.97656	6.03813		5.12184	5.29781	6.15222		91.13±3.59	102.47±6.17	107.33±10.22		3.94	6.03	9.52
185	Fenobucarb	0.005	1.21368	2.05451	1.23984		2.71194	2.66236	1.61522		94.84±3.6	100.06±1.64	105.41±1.93		3.79	1.64	1.83
186	Phenamacril	0.005	5.43455	2.33386	1.99152		6.80933	2.88149	1.85454		80.01±3.64	96.15±6.22	104.57±2.47		4.55	6.47	2.37
187	Tetraconazole	0.01	5.07513	1.64342	2.79676		4.94816	3.9718	2.24691		97.75±3.69	94.29±6.89	105.42±2.72		3.78	7.3	2.58
188	Thiacloprid	0.001	5.62474	1.81698	2.09059		5.12482	3.13402	1.81334		85.51±3.72	91.05±3.8	102.9±3.42		4.35	4.17	3.32
189	Mepronil	0.01	2.26372	3.39262	2.39179		4.87952	4.4524	3.78169		83.07±3.76	94.87±4.37	101.51±3.6		4.53	4.61	3.54
190	2,4-Diethyl-9H-thioxanthen-9-one	0.01	9.12209	4.81328	13.038		8.29366	9.29943	8.96802		98.84±3.8	85.96±9.57	109.6±7.96		3.85	11.14	7.26
191	SudanI	0.01	4.64998	5.79293	8.43656		4.09327	6.05759	6.75203		101.61±3.89	100.92±4.7	109.37±9.18		3.82	4.65	8.39
192	Hexazinone	0.005	2.74782	2.59864	0.910972		3.43349	2.61311	1.49702		91.74±3.93	97.27±1.29	103.89±1.31		4.28	1.33	1.26
193	Coumaphos	0.001	1.78346	4.25049	1.23469		2.58318	3.10768	1.5589		103.46±3.94	108.42±4.96	117.26±3.46		3.8	4.57	2.95
194	Crufomate	0.005	1.57207	2.70452	5.92741		3.24903	3.16797	4.20377		92.11±3.94	103.24±7.35	103.59±1.98		4.27	7.11	1.91
195	Ractopamine	0.005	6.09836	7.42861	6.65149		8.13314	15.7939	8.30419		89.96±3.95	96.67±11.39	89.35±8.46		4.39	11.79	9.47
196	Monolinuron	0.01	4.60599	2.03732	2.93729		6.97041	2.86323	3.15488		80.91±3.97	91.94±5.88	99.06±3.88		4.91	6.39	3.92
197	Prazosin hydrochloride	0.01	6.25057	3.9427	2.4963		7.00585	5.48715	2.37883		83.71±3.98	83.31±6.22	97.52±3.22		4.75	7.47	3.3
198	Naftifine hydrochloride	0.005	3.5094	5.61831	6.20913		4.98032	4.21247	4.22972		94.72±4.03	94.99±8.15	101.87±6.74		4.25	8.58	6.62
199	Ofurace	0.01	5.2529	2.20399	3.2178		5.12435	2.53363	2.93582		85.52±4.06	94.47±3.91	104.45±5.51		4.74	4.14	5.28
200	Napropamide	0.005	4.41262	4.3389	1.94754		4.61569	5.11625	2.48885		87.48±4.07	94.97±1.96	103.71±3.85		4.65	2.06	3.71
201	Pseudovardenafil	0.005	9.80943	5.40305	2.90849		7.81856	3.76033	2.41904		93.69±4.07	98.87±5.08	101.38±3.9		4.35	5.14	3.85
202	Repaglinide	0.005	4.80139	1.38385	2.05372		7.47274	3.61253	2.69727		93.2±4.09	97.07±4.17	101.5±3.68		4.39	4.29	3.62
203	Thifensulfuron-methyl	0.005	5.78838	3.13503	2.87008		8.46657	3.57676	2.71637		87.37±4.12	101.6±1.92	101.19±3.86		4.71	1.89	3.82
204	Chlorpromazine	0.01	5.37097	6.48847	3.64985		6.43028	6.29149	3.02407		96.91±4.13	95.12±9.72	110.54±1.4		4.26	10.22	1.27
205	Phosphamidon	0.001	2.30944	1.7393	1.1765		5.82307	1.91453	1.8311		83.19±4.14	89.64±2.53	99.48±1.77		4.97	2.82	1.78
206	Chlorfenvinphos	0.01	2.82642	3.43214	1.23271		6.48384	4.31002	2.87186		81.01±4.15	100.12±4.84	100.58±2.78		5.13	4.83	2.77
207	Chlorimuron-ethyl	0.01	5.09104	3.46885	2.78081		5.65529	3.59407	3.93552		93.82±4.17	94.08±1.89	96.37±7.79		4.45	2.01	8.09
208	Nifedipine	0.1	17.8291	12.0169	21.5633		16.1283	13.321	19.3678		97.73±4.23	90.3±18.28	96.71±27.69		4.33	20.24	28.63
209	Fenfuram	0.005	3.48958	2.41139	1.47432		4.22456	3.07545	2.84501		92.79±4.24	94.97±3.2	103.69±2.33		4.57	3.37	2.25
210	Trimethoprim	0.01	3.42511	3.29651	2.4441		4.80747	3.98071	3.78015		95±4.25	96.21±6.75	97.52±6.02		4.47	7.02	6.17
211	Finasteride	0.01	2.98729	4.00546	2.54655		6.05952	4.45752	3.20425		94.75±4.29	97.39±3.22	106.29±2.02		4.53	3.3	1.9
212	Bambuterol	0.05	2.27062	6.32931	4.0059		5.95486	5.26395	3.04887		90.76±4.35	87.08±3.29	92.76±3.75		4.79	3.78	4.04
213	Triazophos	0.001	4.54309	3.56667	2.12496		4.05693	6.13275	2.3698		82.86±4.38	92.39±4.1	102.82±3.76		5.29	4.44	3.66
214	Dimethametryn	0.005	2.09739	1.43977	1.33039		2.9077	2.71056	1.56907		91.16±4.4	100.68±1.93	109.23±1.52		4.83	1.92	1.39
215	Sulfaphenazole	0.01	6.82239	10.6742	3.55347		8.98249	8.47238	3.35679		82.24±4.44	86.08±8.01	106.08±4.32		5.4	9.3	4.07
216	Fluridone	0.001	5.62327	3.88884	3.36821		4.66683	4.52703	2.73984		88.87±4.53	89.56±2.7	105.54±4.57		5.1	3.02	4.33
217	Chlorpheniramine maleate	0.01	8.42497	5.43841	3.90184		7.28313	4.46256	3.23902		95.02±4.55	89.33±2.25	103.39±2.03		4.79	2.52	1.97
218	Loratadine	0.01	4.70308	3.70195	2.35783		4.23782	2.85021	1.82859		99.36±4.55	99.44±3.05	102.28±1.92		4.58	3.07	1.87
219	Fenpyrazamine	0.1	5.65707	6.46778	5.80206		5.92494	9.13978	7.28997		90.94±4.56	97.82±6.58	107.3±8.35		5.01	6.73	7.78
220	Flurtamone	0.001	3.31268	3.2429	1.90065		2.76124	3.19911	2.04721		92.28±4.59	90.87±3.7	106.52±2.03		4.97	4.07	1.91
221	3-(4-Methylbenzylidene)camphor	0.1	11.2376	9.22919	4.8587		9.59112	7.22158	4.69267		84.45±4.59	84.97±4.62	86.87±3.78		5.44	5.44	4.35
222	Mefenamic Acid	0.05	5.33472	3.10948	1.60826		5.07445	3.03268	2.45327		93.24±4.69	97.11±3.86	100.09±2.68		5.03	3.97	2.67
223	Flutriafol	0.01	7.85847	3.56457	1.49094		6.49203	5.06083	2.54443		89.37±4.71	92.83±3.79	105.65±1.83		5.27	4.08	1.73
224	Mebendazole	0.01	3.79764	0.936211	3.2216		5.14405	3.09882	3.34847		97.61±4.74	98.09±1.65	103.96±5.05		4.86	1.69	4.86
225	Terbuthylazine	0.005	2.39108	3.36059	1.22055		4.87913	3.4265	1.30008		82.92±4.76	95.47±3.45	103±2.58		5.74	3.61	2.5
226	Aziprotryne	0.1	7.24338	6.01041	3.01384		6.51562	7.68751	2.855		70.65±4.82	82.55±10.04	88.12±4		6.82	12.17	4.54
227	Fensulfothion	0.05	2.25131	4.13317	2.25038		3.77192	5.04054	2.95655		95.22±4.82	102.52±2.97	101.92±2.19		5.06	2.9	2.15
228	Oxadiazon	0.005	4.76865	4.46855	2.97167		5.59944	4.87154	3.08449		92.91±4.82	96.94±2.75	102.73±3.17		5.19	2.83	3.09
229	Prosulfocarb	0.01	4.29989	9.79016	4.11103		6.64384	10.3961	2.98709		75.28±4.84	77.55±7.79	80.24±1.35		6.43	10.04	1.68
230	Leucomalachite green	0.01	6.056	2.52605	7.32031		6.40236	4.17681	6.55714		99.4±4.84	97.36±5.54	104.06±11.68		4.87	5.69	11.22
231	2-Aminoflubendazole	0.01	6.31083	6.25409	1.4871		6.98023	5.05314	1.6305		92.01±4.87	88.9±5.11	98.67±3.61		5.3	5.75	3.66
232	Hexaconazole	0.05	11.1439	2.59365	2.56212		10.1717	4.06345	3.41752		102.27±4.88	97.51±8.04	100.86±2.98		4.77	8.25	2.95
233	Chlorpyrifos	0.05	5.23217	7.90265	4.76336		4.95729	8.04385	4.22578		70.64±4.91	82.99±5.45	82.98±4.29		6.95	6.57	5.17
234	Pencycuron	0.005	4.72113	3.30641	1.1637		3.56887	2.95251	2.47339		90.69±4.92	96.97±3.71	103.67±2.79		5.42	3.82	2.69
235	Furmecyclox	0.01	3.7645	13.1914	3.6311		4.96241	13.4153	2.89307		75.91±4.92	82.7±8.6	83.6±2.67		6.48	10.4	3.2
236	Sethoxydim	0.005	9.91112	4.67106	4.15813		7.6302	5.85254	4.02722		97.45±4.93	96.24±9.24	104.33±5.21		5.06	9.6	4.99
237	Testosterone	0.5	4.33733	2.94665	2.34312		6.13887	4.85957	4.02705		100.71±4.95	103.67±7.13	98.92±3.16		4.92	6.88	3.19
238	Pyroquilon	0.05	7.13031	3.07416	1.56368		5.90619	3.38802	2.66533		78.93±4.95	89.57±4.78	104.02±4.56		6.28	5.33	4.39
239	Azoxystrobin	0.001	5.99398	12.4682	3.46807		6.38372	10.3841	3.10047		95.85±4.97	88.01±6.2	108.55±1.14		5.19	7.05	1.05
240	Sulfoaildenafil	0.1	10.1419	8.74062	7.1764		11.6492	8.47686	6.50367		81.63±4.97	97.01±17.79	88.08±6.15		6.09	18.34	6.98
241	Ketoprofen	0.1	3.05338	2.3492	3.38737		2.88861	5.23197	3.74062		114.4±5.01	91.09±6.69	100.56±2.09		4.38	7.35	2.08
242	Clorprenaline	0.05	6.85517	6.23316	3.7966		9.56717	6.54468	4.96387		77.32±5.01	81.38±7.4	82.29±6.71		6.48	9.09	8.16
243	Cyromazine	0.05	19.9063	5.93258	1.18487		13.4512	6.90953	4.66024		86.74±5.01	93.56±1.61	71.26±7.64		5.78	1.72	10.72
244	Bupirimate	0.005	6.84867	2.33574	1.50661		5.78847	3.20905	2.1184		88.67±5.01	98.17±2.99	104.24±4.55		5.65	3.05	4.36
245	Iminoctadinetris	5	N/A	8.70689	15.1184		N/A	7.75463	16.3253		N/A	77.88±10.54	70.21±10.5		N/A	13.53	14.96
246	Pyrazoxyfen	0.05	4.43506	3.26643	3.93163		5.83239	4.09801	4.04015		92.53±5.05	94.33±3.53	102.15±4.17		5.46	3.74	4.08
247	Pioglitazone hydrochloride	0.005	2.59207	4.08768	2.05616		5.84683	3.3344	2.88469		91.58±5.09	96.13±2.79	104.85±3.89		5.56	2.91	3.71
248	Flumetsulam	0.01	11.4148	9.71622	8.84613		13.9842	14.0654	15.7575		86.1±5.11	90.83±12.45	94.75±8.6		5.94	13.71	9.08
249	Pyriproxyfen	0.005	3.03337	1.29838	2.62451		3.73951	1.83472	4.44231		90.38±5.12	99.53±3.39	104.14±5.01		5.67	3.41	4.81
250	Desethylsebutylazine	0.005	2.07154	2.3038	1.69258		4.26754	2.31854	1.69383		87.38±5.12	93.93±3.42	105.27±0.77		5.86	3.64	0.73
251	Simetryn	0.01	3.19106	2.41111	2.41103		3.5094	2.34249	1.64035		89.06±5.14	94.48±2.41	100.61±2.02		5.77	2.55	2.01
252	Oxarbazepine	0.01	4.84603	4.72574	4.90329		6.57981	11.9803	9.04293		113.73±5.14	84.54±6.5	98.14±8.52		4.52	7.69	8.68
253	Dimethirimol	0.005	2.89386	2.93011	2.9202		3.8711	4.10939	3.66359		88.74±5.15	97.1±5.57	104.29±1.57		5.81	5.74	1.5
254	Flurprimidol	0.05	10.7044	3.08702	1.24378		10.0277	4.73687	3.36221		80.52±5.16	92.5±5.86	100.92±3.14		6.41	6.34	3.11
255	Ethofumesate	0.01	4.03972	4.92734	2.37606		3.59853	4.80542	2.90519		92.75±5.19	96.46±8.88	101.87±3.9		5.6	9.2	3.83
256	Amitriptyline	0.01	2.42513	3.55176	3.16612		2.88589	3.75785	3.37762		89.7±5.21	95.11±3.2	110.39±4.12		5.81	3.36	3.73
257	(E)-Dimethomorph	0.01	4.02166	2.9048	2.98753		5.79631	4.74648	3.27303		89.64±5.23	93.06±2.27	96.84±2.57		5.83	2.44	2.66
258	Pirimiphos-methyl	0.005	2.9856	6.19559	4.29418		5.81658	7.19183	3.28158		70.71±5.26	82.94±3.57	88.46±1.54		7.44	4.3	1.74
259	Phosfolan	0.001	2.3942	2.76024	1.84604		2.65985	2.39754	1.82922		90.19±5.39	93.63±2.14	104.9±3.29		5.98	2.29	3.14
260	Ketoconazole	0.01	11.5208	4.95202	4.01045		9.46497	6.9096	3.15678		89.75±5.4	99.29±12.21	100.98±5.41		6.02	12.3	5.36
261	Quinalphos	0.01	6.19298	5.78004	4.13479		4.57692	4.77262	2.91491		87.74±5.41	101.48±3.35	95.58±4.66		6.17	3.3	4.88
262	Cyanazine	0.005	5.51674	2.88042	2.04816		4.7743	2.08823	1.87232		90.05±5.42	97.52±4.24	102.36±1.52		6.01	4.35	1.49
263	Betaxolol	0.05	11.2189	2.9733	1.94934		10.0046	2.80656	2.58076		77.54±5.43	95.39±6.72	97.18±4.08		7	7.04	4.2
264	Prometryn	0.01	5.45265	2.84232	1.64952		6.51627	2.66703	1.78962		83.85±5.44	89.38±0.97	95.92±2.02		6.48	1.09	2.11
265	Metazosulfuron	0.05	5.51042	2.85203	2.48198		4.75082	4.74463	4.18059		86.6±5.51	99.67±5.38	102.02±4.65		6.36	5.4	4.56
266	Malachite green cation	0.01	4.5922	3.54837	3.15831		3.90132	4.1975	3.16714		76.75±5.52	97.17±5.28	93.56±3.47		7.2	5.43	3.71
267	Famphur	0.01	4.69899	3.92603	2.50525		3.30908	5.52137	2.44049		82.98±5.54	93.5±4.89	102.07±2.23		6.68	5.22	2.18
268	Benodanil	0.005	2.5853	2.1707	0.963809		4.10079	3.15997	3.57079		85.24±5.56	98.99±3.1	106.64±2.26		6.52	3.13	2.12
269	Fluphenazine	0.001	2.72661	3.40706	1.80982		3.92596	3.97345	3.43821		97.12±5.56	89.23±3.66	104.45±7.66		5.73	4.11	7.33
270	Diethyltoluamide	0.05	1.44519	3.9704	3.00128		3.14803	4.75381	2.73421		86.84±5.56	86.11±4.51	109.07±4.17		6.41	5.24	3.83
271	Pyributicarb	0.01	4.53936	3.30094	3.97073		5.50296	3.71386	3.11187		90.35±5.57	95.78±1.96	101.29±3.16		6.16	2.04	3.12
272	Penoxsulam	0.01	7.00808	4.34174	2.15617		6.01231	4.04043	2.88734		90.18±5.59	96.13±5.31	97.48±1.7		6.19	5.53	1.75
273	Demeton-S-methyl	0.05	16.5477	11.7475	5.16096		12.8963	8.90577	6.68666		79.01±5.59	80.48±8.34	90.17±3.43		7.08	10.36	3.81
274	4-Chloro-5-(p-tolyl)-1H-imidazole-2-carbonitrile	0.005	9.3237	3.31915	2.04613		7.07182	3.81613	2.02629		94.87±5.62	102.37±3.9	105.19±1.6		5.92	3.81	1.52
275	Auramine O	0.01	3.7377	2.24262	2.14479		5.55216	3.80991	3.72334		78.65±5.62	92.94±4.71	94.37±4.3		7.15	5.07	4.56
276	Ketorolac	0.05	3.65634	2.6571	2.1023		4.85363	3.77983	2.24879		85.95±5.63	95.23±1.46	101.8±0.91		6.55	1.53	0.89
277	Cinosulfuron	0.005	4.2888	3.12352	2.98772		4.59842	2.67	2.73037		93.75±5.64	100.21±0.49	102.36±3.21		6.02	0.49	3.14
278	Spirotetramat-mono-hydroxy	0.05	8.58205	5.11638	1.64631		8.85056	7.72294	3.04978		96.82±5.66	106.84±3.68	102.51±5.17		5.85	3.44	5.05
279	Clethodim Sulfone	0.05	6.92798	9.31529	2.33112		11.3483	7.52472	2.78451		104.77±5.67	100.17±7.01	107.14±3.58		5.41	6.99	3.34
280	Pirimiphos-ethyl	0.005	5.45027	6.77215	4.51027		5.6118	5.69422	3.59683		80.88±5.72	92.15±5.33	97.41±3.57		7.08	5.78	3.66
281	Fenthion oxon	0.05	2.75435	3.3692	1.72389		4.48851	3.71405	2.50184		84.14±5.73	93.17±6.71	102.64±3.12		6.8	7.2	3.04
282	Paraoxon	0.005	5.57639	2.57123	1.82304		6.40333	3.34242	1.93415		78.57±5.74	94.24±1.57	101.1±3.41		7.3	1.67	3.37
283	Propisochlor	0.01	5.38565	7.83091	1.62721		6.6675	9.81164	2.43173		77.75±5.75	84.25±7.68	93.88±5.3		7.4	9.12	5.65
284	Imipramine hydrochloride	0.001	3.52551	2.44551	1.7573		3.96292	2.79701	2.3226		97.3±5.78	95.3±0.4	109.64±1.26		5.94	0.42	1.15
285	4-Isopropylthioxanthone	0.01	6.95449	1.97006	2.89875		5.87469	2.11028	3.86222		97.38±5.78	98.47±3.29	104.31±4.9		5.93	3.34	4.7
286	Flusilazole	0.001	2.81247	1.79001	1.53399		5.21631	2.91035	1.76031		95.93±5.8	94.78±1.67	105.47±2.61		6.04	1.76	2.47
287	Heptenophos	0.05	6.11758	9.12153	6.67525		4.65403	10.4356	5.6318		77.22±5.8	76.9±7.8	96.45±4.4		7.52	10.14	4.56
288	Fenazaquin	0.01	9.97709	3.87583	8.11077		10.0727	9.36068	8.96869		84.69±5.82	87.76±10.69	107.08±7.07		6.87	12.18	6.6
289	Penflufen	0.005	4.22731	3.37319	3.28669		3.85297	3.31175	3.19928		92.97±5.85	99.52±5.46	106.36±1.49		6.29	5.48	1.4
290	Chlorsulfuron	0.005	6.14079	4.92766	4.10124		4.6522	3.63598	3.59004		95.7±5.89	96.08±1.77	96.88±4.41		6.15	1.84	4.55
291	Linuron	0.01	1.97246	3.60699	1.62451		6.2766	3.25691	2.21139		90.55±5.89	99.19±1.56	104.88±4.22		6.51	1.57	4.02
292	Fenaminostrobin	0.005	3.23871	3.53776	2.65866		2.96244	5.19605	2.48277		99.37±5.98	92.58±3.95	105.07±2.69		6.01	4.27	2.56
293	Salbutamol	0.1	5.13697	4.94211	2.81342		5.33495	4.45453	5.25258		89.21±6	95.1±2.88	83.36±3.97		6.73	3.03	4.76
294	Pyrimethanil	0.01	5.78724	4.54885	2.03729		6.90493	6.90092	1.70492		76.43±6	86.17±8.76	91.31±1.69		7.86	10.16	1.85
295	Fenamidone	0.005	5.92696	3.86486	2.35076		5.60623	3.91603	3.43966		93.59±6.05	96.54±2.86	106.46±1.89		6.46	2.96	1.78
296	Chlorbromuron	0.05	8.16239	2.22175	1.99243		8.82905	2.68806	2.16771		85.04±6.08	97.41±3.09	102.48±3.28		7.15	3.17	3.2
297	Isoxaben	0.01	5.02827	2.70239	2.47706		5.36384	6.51546	2.96158		84.35±6.09	90.65±6.45	96.41±3.44		7.22	7.11	3.57
298	Quinoxyfen	0.005	4.38697	3.75118	2.90271		3.85278	3.65065	3.29581		91.52±6.1	96.44±3.88	98.87±5.82		6.67	4.03	5.89
299	Clenproperol	0.05	5.07036	6.61992	4.80859		6.22179	6.50705	5.06104		96.29±6.13	98.76±8.34	94.96±2.89		6.36	8.45	3.04
300	Benzofenap	0.05	7.73521	1.83019	1.07594		6.84707	2.19401	2.01381		88.15±6.2	100.44±4.12	102.44±1.41		7.03	4.1	1.38
301	Tetrachlorvinphos	0.01	6.26123	4.64859	3.84197		7.57083	4.76185	3.06857		83.58±6.25	88.44±3.15	99±3.92		7.48	3.56	3.96
302	Neotame	0.01	8.50489	9.59645	2.32213		7.62539	7.20422	2.96093		95.5±6.27	95.01±2.12	106.27±3.09		6.56	2.24	2.91
303	Clonazepam	0.1	13.2851	6.27884	2.29598		14.1787	5.18624	2.79687		80.68±6.3	94.28±8.97	100.52±4.05		7.81	9.51	4.03
304	Propyrisulfuron	0.01	5.78214	4.3568	4.31614		6.0443	6.47215	5.59882		80.65±6.31	94.78±10.49	93.7±6.1		7.82	11.07	6.51
305	Propazine	0.01	3.13674	3.52012	0.988607		6.78074	2.99139	1.29126		79.51±6.33	93.9±5.2	100.22±4.69		7.96	5.54	4.68
306	Bromuconazole	0.01	5.13461	4.42028	2.11211		4.89261	4.44767	2.44185		91.53±6.33	100.4±5.4	103.6±1.9		6.92	5.38	1.83
307	Thiazafluron	0.01	6.4163	7.50399	6.60106		6.60658	8.7492	5.52176		91.01±6.39	84.89±4.26	104.4±11.85		7.02	5.01	11.35
308	Thiazopyr	0.01	2.73451	4.98169	1.7525		6.45009	5.74254	2.57642		83.42±6.4	93.9±6.69	96.51±3.27		7.67	7.13	3.39
309	Fensulfothion-oxon	0.005	6.31732	1.45093	1.71383		5.61526	2.42837	1.84619		87.21±6.49	97.1±4.98	101.32±3.3		7.44	5.13	3.26
310	Androstenedione	0.1	7.19625	3.3198	1.21055		5.61049	3.67366	3.41409		99.4±6.51	98.8±3.59	104.75±2.18		6.55	3.63	2.08
311	Fenpyroximate	0.001	1.69025	4.33589	3.49286		3.66282	5.81791	2.77703		107.13±6.53	95.88±7.09	110.02±2.84		6.09	7.39	2.58
312	Mesulfenfos	0.005	2.35199	2.11773	0.791949		4.20303	2.71071	1.35753		88.85±6.58	94.68±3.34	101.74±3.2		7.41	3.53	3.15
313	Diazepam	0.01	5.74685	3.43179	2.95548		5.17692	3.88472	3.02879		89.84±6.59	92.73±4.7	98.41±5.03		7.33	5.07	5.11
314	Flutolanil	0.01	5.96148	2.05956	2.72815		5.48063	4.39377	3.29348		90.35±6.6	87.81±3.2	96.29±2.09		7.31	3.64	2.17
315	Florasulam	0.005	3.52643	4.7291	4.47902		3.98977	3.84675	3.54573		93.38±6.63	96.05±4.32	98.13±5.3		7.1	4.49	5.4
316	Spinosyn D	0.001	6.06362	2.54037	6.18866		5.85852	7.4079	5.39874		125.61±6.66	94.26±11.89	103.87±6.28		5.3	12.62	6.05
317	Penbutolol	0.01	3.29902	3.66606	2.61765		5.66042	2.81372	3.19888		85.05±6.67	97.05±3.72	101.85±4.37		7.84	3.83	4.29
318	Cetirizine hydrochloride	0.01	4.7126	1.66948	3.27476		4.06374	5.44347	3.41656		106.52±6.72	98.23±4.8	107.09±6.94		6.31	4.89	6.48
319	Silthiofam	0.05	9.22231	4.35493	2.28682		7.4621	4.99405	2.33181		79.99±6.72	92.88±2.68	96.57±4.18		8.4	2.88	4.33
320	Brodifacoum	0.01	4.21601	3.91449	9.24551		5.16431	4.64244	6.49468		89.44±6.73	87.79±5.58	97.82±3.65		7.52	6.36	3.73
321	Sulfadimethoxine	0.005	6.00001	3.48806	1.61359		5.54654	4.4782	2.93958		89.66±6.75	96.6±5.71	102.58±5.91		7.53	5.91	5.76
322	Triflumizole-amino	0.05	9.7868	4.38184	2.3193		7.28482	5.78459	3.1738		77.03±6.76	80.44±6.24	89.82±8.49		8.77	7.75	9.45
323	Metsulfuron-methyl	0.001	5.67731	2.57075	2.41449		6.09161	2.29755	2.26259		91.2±6.78	96.54±3.99	102.42±6.18		7.43	4.13	6.04
324	Pyrimidifen	0.005	3.747	3.01011	4.50843		4.82857	3.86711	3.22546		98.15±6.78	98.98±5.05	105.03±4.85		6.9	5.1	4.61
325	Triamiphos	0.005	3.85919	3.3099	2.06486		5.2256	4.45785	3.10022		93.9±6.83	92.17±2.16	104.94±1.39		7.27	2.34	1.32
326	Anilofos	0.005	3.57486	3.38493	2.38655		4.32083	3.16657	2.14711		87.68±6.84	101.51±3.77	104.12±1.31		7.8	3.71	1.26
327	Droperidol	0.001	7.11972	5.70368	1.75222		7.19768	3.90223	1.96035		95.85±6.84	94.07±3.34	104.25±3.63		7.14	3.55	3.48
328	Triflumuron	0.01	4.97332	2.51223	1.3391		5.18592	4.21622	2.53642		99.9±6.84	101.78±5.13	108.15±4.89		6.85	5.04	4.52
329	Etoxazole	0.005	3.7046	2.75208	2.48788		3.69944	7.31561	2.13806		101.55±6.87	93.4±4.71	107.35±2.3		6.77	5.04	2.14
330	Cyprodinil	0.01	4.94961	2.57403	2.92289		5.24165	2.84934	2.59442		93.53±6.88	98.94±3.04	102.32±2.52		7.36	3.08	2.46
331	Fenbuconazole	0.005	3.64114	4.01744	3.40617		5.26809	4.4577	3.20462		94.86±6.89	92.7±4.27	102.49±2.42		7.27	4.6	2.36
332	Sebuthylazine	0.01	11.6713	5.37021	4.07284		10.7125	5.37002	2.83226		76.94±6.9	95.53±5.79	92.56±2.53		8.96	6.07	2.73
333	Mebendazole-amine	0.05	7.59247	6.08184	2.62306		6.14725	5.10378	2.58794		88±6.9	89.79±5.44	103.03±4.7		7.84	6.06	4.56
334	Metoxuron	0.01	8.08671	4.35861	1.5577		6.30726	3.6033	2.70706		85.23±6.91	93.74±9.91	105.45±3.3		8.1	10.57	3.13
335	Fenthion sulfone	0.1	5.64112	6.67103	1.71281		7.79037	6.46341	2.32976		85.87±6.91	87.05±5.02	98.73±7.02		8.05	5.77	7.11
336	Oxilinic acid	0.05	9.29542	3.25606	2.33528		8.94618	4.76746	2.51668		76.31±6.95	90.82±3.78	93.44±4.63		9.11	4.17	4.95
337	Metolcarb	0.01	8.2892	6.48707	3.39223		6.42252	5.23001	3.53219		86.2±6.98	88.95±5.93	87.98±6.55		8.1	6.67	7.45
338	Hydroquinidine	0.05	5.71014	8.42673	2.86587		5.74743	6.37916	6.27228		94.34±7.02	83.93±4.67	92.76±3.77		7.44	5.56	4.06
339	Butralin	0.01	11.7263	10.7765	6.54094		12.2871	10.6094	11.397		80.56±7.04	83.52±5.74	90.64±14.09		8.74	6.87	15.55
340	Fluopicolide	0.01	4.21539	2.83355	2.1144		5.3416	3.72562	4.56127		85.91±7.04	86.25±2.82	99.73±1.93		8.2	3.26	1.93
341	Nadifloxacin	0.05	8.51702	6.47151	2.05702		6.37499	4.90009	4.16493		82.96±7.05	86.01±5.01	92.72±3.78		8.5	5.83	4.08
342	Desmetryn	0.005	6.3596	3.99479	1.16437		5.56905	3.29615	1.51385		93.15±7.06	94.75±2.5	100.6±1.91		7.58	2.64	1.9
343	Isouron	0.05	3.61327	2.17137	2.51258		6.4432	2.86955	2.67908		79.53±7.1	89.83±3.73	102.05±2.89		8.92	4.15	2.83
344	4,4'-Bis(diethylamino)benzophenone	0.01	1.50796	2.49404	2.90517		4.617	3.19671	3.09438		97.4±7.11	100.51±7.48	102.51±3.39		7.3	7.44	3.31
345	Acepromazine	0.01	12.9885	7.28339	3.8662		10.0467	6.56011	4.1063		91.08±7.11	98.29±1.82	105.82±5.42		7.81	1.86	5.12
346	Carazolol	0.005	5.66583	7.72228	2.85807		5.08188	6.6798	3.79773		80.87±7.12	82.44±9.55	93.17±1.5		8.8	11.58	1.61
347	Carbendazim	0.05	3.97615	4.20891	2.32851		5.21854	3.8564	2.51775		99.55±7.15	95.94±3.67	103.64±2.37		7.18	3.82	2.29
348	Fenamiphos sulfoxide	0.005	5.0508	4.12975	2.43764		6.57561	6.01067	2.74315		87.74±7.16	90.06±2.17	105.05±4.15		8.16	2.41	3.95
349	Quizalofop-ethyl	0.01	2.01446	3.67161	2.43234		8.59495	11.837	5.78434		105.07±7.22	108.22±7.42	111.73±3.66		6.87	6.86	3.28
350	Nalidixic acid	0.05	4.97759	1.69959	2.50026		6.35389	2.00242	1.58505		83.42±7.22	87.54±0.62	97.74±0.82		8.66	0.71	0.84
351	7-Aminoflunitrazepam	0.01	2.41724	3.79592	0.575687		3.04145	4.53224	2.36224		82.58±7.24	87.83±1.7	98.93±4.02		8.77	1.94	4.06
352	Fluazuron	0.01	5.05295	3.1772	10.9638		6.68877	7.33778	9.69737		107.75±7.29	100.27±8.9	104.47±12.18		6.77	8.88	11.66
353	Chlorotoluron	0.01	5.18397	2.30836	2.04645		6.91293	5.03416	2.83629		90.66±7.3	98.01±5.45	107.51±3.86		8.05	5.56	3.59
354	Diflufenican	0.005	3.94506	0.940752	1.86862		3.37373	5.4326	3.13052		103.19±7.31	93.59±1.37	112.06±5.15		7.08	1.47	4.6
355	Enestroburin	0.001	2.83899	5.76001	4.43242		4.39591	5.0383	4.28893		102.97±7.33	105.47±3.4	113.6±2.59		7.12	3.23	2.28
356	Pipemidic acid	5	N/A	4.1401	3.46206		N/A	8.92469	3.58454		N/A	85.71±12.59	82.93±3.39		N/A	14.69	4.09
357	Sedaxane	0.005	3.00575	2.35229	1.86788		4.86852	5.03183	2.03622		91.53±7.38	98.83±3.5	107.37±2.91		8.06	3.54	2.71
358	Pyraclostrobin	0.005	5.52105	5.09288	7.45223		5.80242	4.46886	7.75516		97.67±7.39	101.5±4.73	108.97±8.51		7.57	4.66	7.81
359	Rosiglitazone maleate	0.005	3.75466	3.29939	1.50893		5.29323	3.50143	2.68713		87.94±7.39	90.26±2.34	103.02±2.37		8.4	2.59	2.3
360	Cyflufenamid	0.01	5.6966	2.11105	2.47198		6.60106	6.22139	2.67666		97.1±7.4	99.41±4.57	99.19±2.26		7.62	4.6	2.28
361	Timolol	0.005	7.04145	11.4308	6.57076		6.98506	10.2472	9.54437		82.12±7.42	89.16±11.92	88.28±9.96		9.04	13.37	11.29
362	Tolfenpyrad	0.01	7.25645	2.27882	2.61878		5.16218	3.85136	2.19454		106.22±7.45	101.36±2.91	106.37±4.47		7.02	2.88	4.2
363	Pyriminobac-methyl	0.005	5.59772	6.06389	3.46732		5.63545	4.98154	2.9004		94.76±7.47	100.99±1.93	106.69±4.52		7.88	1.91	4.24
364	Simazine	0.01	7.17685	5.62124	3.81156		9.80325	5.52503	3.20234		77.92±7.49	95.21±9.42	105.92±2.84		9.61	9.9	2.68
365	Tris(2-isopropylphenyl) phosphate	0.005	4.5446	4.27952	3.70499		5.66249	5.6622	5.89746		91.97±7.49	99.29±6.8	105.86±10.48		8.15	6.85	9.9
366	Oxadixyl	0.005	11.5626	9.47513	3.30729		11.5456	8.55459	2.93764		88.69±7.49	84.19±6.14	88.62±6.59		8.45	7.29	7.44
367	Triadimefon	0.05	3.95025	6.25704	2.68846		6.4662	7.88046	4.52489		86.13±7.52	99.92±8.07	100.36±7.75		8.73	8.07	7.72
368	Diniconazole	0.05	6.54481	7.77995	3.99935		7.74681	5.88537	3.23769		102.69±7.56	83.72±4.66	100.93±1.17		7.36	5.57	1.16
369	Propranolol hydrochloride	0.005	8.10993	3.86848	2.10973		8.80351	3.86607	2.32859		84.86±7.61	88.86±7.63	96.96±2.83		8.97	8.59	2.91
370	Clethodim Sulfoxide	0.005	7.24647	6.01385	2.64343		7.35821	4.8326	3.31434		98.99±7.63	99.69±4.19	106.56±3.39		7.7	4.21	3.18
371	Fenpiclonil	0.01	3.45452	8.05238	4.06935		9.49028	7.58288	3.91363		85.78±7.66	100.43±10.02	102.74±6.13		8.93	9.98	5.97
372	Spinosyn A	0.001	4.13415	5.06604	5.77893		6.80702	4.79185	5.60218		115.07±7.67	103.24±3.4	97.06±7.19		6.66	3.29	7.41
373	Flufenoxuron	0.001	7.02562	5.01629	2.86107		6.95159	8.50379	3.06562		108.02±7.67	98.81±4.82	123.27±16.07		7.1	4.88	13.03
374	Gabapentin	0.1	5.91533	5.07387	2.38686		5.6022	7.76966	4.25313		89.93±7.68	79.47±6.87	116.36±5.02		8.54	8.64	4.32
375	Isopropalin	5	N/A	12.2925	7.77087		N/A	12.821	6.0284		N/A	85.49±9.66	98.38±4.08		N/A	11.3	4.15
376	Brompheniramine	0.05	6.24936	3.96294	1.39523		6.3181	4.61547	3.30583		89.81±7.76	88.53±4.33	104.45±2.68		8.64	4.89	2.56
377	Tebuconazole	0.01	15.7803	2.49595	3.10276		11.7826	4.89437	3.2943		97±7.84	95.79±2.32	106.03±5.51		8.08	2.43	5.2
378	Myclobutanil	0.05	6.43296	4.1949	3.02556		7.00675	3.72053	3.06148		93.53±7.88	94.95±2.11	105.03±3.78		8.42	2.22	3.6
379	Piperophos	0.01	5.55676	2.25736	2.09633		6.99781	3.04139	2.55504		92.72±7.93	94.27±3.61	97.78±3.12		8.55	3.83	3.19
380	Fenarimol	0.01	9.42962	4.24901	4.29547		8.27753	6.33118	4.08149		93.51±7.93	92.15±6.6	103.42±3.62		8.49	7.16	3.5
381	Cyprazine	0.01	7.35639	4.50092	1.96104		7.28355	6.64145	2.86158		88.92±7.97	91.88±8.37	105.89±6.08		8.96	9.11	5.74
382	Fenoxycarb	0.005	6.34262	3.96201	1.89896		5.32806	4.10516	3.98527		98.23±7.98	97.72±1.55	108.65±3.57		8.12	1.58	3.29
383	Pyrazophos	0.005	3.5898	2.30088	3.07889		8.21685	12.8923	5.19964		94.99±8.01	88.27±5.37	106.7±5.17		8.43	6.09	4.84
384	Carboxin	0.05	5.40435	2.09898	1.78872		6.06422	3.41146	2.12843		89.22±8.02	93.72±1.46	103.08±1.7		8.99	1.55	1.65
385	Foramsulfuron	0.01	6.79994	6.33869	4.28494		7.25759	6.51371	4.98601		83.12±8.11	98.16±7.28	95.9±3.23		9.76	7.42	3.37
386	Papaverine	0.01	11.0866	10.5197	2.95673		7.37277	11.1548	4.0587		86.2±8.12	86.82±6.48	94.08±2.39		9.42	7.47	2.54
387	N,N-Dimethyl-N'-p-tolylsulphamide	0.01	8.45325	8.20577	6.27141		9.69581	9.57326	8.57341		94.83±8.16	102.2±3.49	103.53±11.2		8.6	3.42	10.82
388	Clethodim	0.1	6.13256	2.75725	1.99046		6.06062	3.58461	2.46007		103.6±8.16	98.12±4.4	100.74±6.33		7.88	4.48	6.28
389	Diclofenac Acid	0.05	3.84039	4.67255	1.5641		6.91143	5.41639	2.899		119.77±8.19	100.91±5.41	98.49±1.85		6.84	5.36	1.88
390	4-Benzoylbiphenyl	0.05	5.98997	2.33034	5.18361		5.83842	2.348	4.1161		100.45±8.2	99.52±0.89	111.68±6.18		8.16	0.89	5.54
391	Buturon	0.01	6.4363	7.6031	2.25232		5.99716	6.13198	2.36529		91.14±8.2	99.77±1.98	107.47±2.7		9	1.98	2.51
392	Isoxathion	0.01	4.80379	3.74195	1.15681		5.76521	4.6355	4.16047		87.38±8.2	96.2±5.74	103.65±4.07		9.39	5.96	3.93
393	3,5-Dichloroaniline	0.5	6.23994	6.31712	4.09082		10.3969	6.91862	4.40961		96.43±8.21	96.18±4.66	110.26±3.94		8.51	4.84	3.57
394	Dimoxystrobin	0.01	7.32978	9.07629	10.8902		7.5967	9.39878	9.96864		95.03±8.23	100.92±6.23	99.66±12.09		8.66	6.18	12.13
395	Salmeterol	0.05	6.54634	6.50541	2.89876		6.4779	6.40034	2.55552		88.54±8.28	89.25±3.15	107.29±5.89		9.36	3.53	5.49
396	Blasticidine S	1	N/A	4.72666	3.96888		N/A	4.28958	6.03829		N/A	73.33±4.3	85.83±5.26		N/A	5.86	6.12
397	Pyridaphenthion	0.005	5.56521	3.8755	2.74588		6.0662	4.98194	4.04509		84.54±8.31	100.35±3.27	106.89±4.6		9.83	3.26	4.3
398	Thiabendazole	0.5	5.57914	6.11457	5.26471		6.58174	5.73047	6.51345		86.35±8.32	84.97±5.37	90.86±6.99		9.63	6.32	7.69
399	Prochloraz-desimidazole-amino	0.01	4.92707	2.30807	4.44936		6.33365	5.44707	3.63836		87.25±8.38	96.64±4.19	99.46±3.75		9.6	4.34	3.77
400	Sulfachinoxalin	0.05	8.1273	3.38941	2.796		7.21701	2.94925	3.03834		86.49±8.45	99.42±5.48	97.96±3.79		9.77	5.51	3.87
401	Disulfoton sulfone	0.05	3.76785	2.42621	2.15041		9.98674	16.381	10.8061		91.6±8.48	114.11±9.43	107.73±9.38		9.26	8.27	8.71
402	Cumyluron	0.01	5.00923	7.32719	5.65408		4.32085	6.90523	5.50162		95.72±8.52	94.15±9.51	99.58±3.98		8.9	10.1	3.99
403	Acebutolol	0.005	5.00683	5.12365	12.5693		14.0115	10.3852	12.6292		94.3±8.56	108.23±13.47	95.58±6.21		9.07	12.45	6.5
404	Procaterol	0.01	9.95091	3.49195	3.23441		9.68377	7.86335	7.17626		88.26±8.69	83.9±6.85	88.18±7.92		9.85	8.16	8.99
405	Spirotetramat-enol	0.005	5.72403	3.44595	1.63407		6.7516	4.45571	2.79478		94.43±8.7	101.06±1.99	104.46±3.25		9.21	1.97	3.11
406	Sulfentrazone	0.05	5.83038	3.8362	3.75285		7.68254	6.034	5.01902		87.06±8.79	96.49±14.86	98.59±7.28		10.09	15.4	7.39
407	Propiconazole	0.05	3.59571	3.63118	1.67579		4.13101	3.1786	2.23118		99.11±8.79	103.54±4.16	103.45±4.14		8.87	4.02	4
408	Fosthiazate	0.001	6.5897	13.6842	7.61097		6.40756	9.58682	11.5979		97.38±8.79	104.28±7.24	96±14.14		9.03	6.94	14.73
409	Proquinazid	0.005	3.93838	3.8269	9.01871		8.11525	5.93917	6.50721		90.99±8.81	93.47±5.05	108.67±10.01		9.68	5.41	9.22
410	Indoxacarb	0.005	6.93822	4.64437	6.26924		10.9962	9.44259	9.52968		82.88±8.81	99.98±4.04	96.24±10.63		10.63	4.04	11.05
411	Diuron	0.005	3.4085	1.85996	5.04108		3.75572	2.96514	4.65061		95.24±8.83	98.6±1.84	104.49±9.41		9.27	1.87	9.01
412	Metosulam	0.01	4.02623	2.73094	2.62304		6.41379	4.65986	4.7014		85.93±8.86	94.41±4.02	95.41±5.32		10.31	4.26	5.58
413	Progesterone	0.05	5.13441	2.19227	1.30662		4.87121	3.64251	2.39242		105.85±8.89	99.79±3.63	100.15±3.61		8.39	3.64	3.6
414	Triclocarban	0.1	11.4706	10.3184	6.50678		9.63575	8.24136	7.32516		81.84±8.96	91.32±3.66	115.82±7.36		10.95	4.01	6.35
415	4,4'-Thiodianiline	0.05	9.81508	6.81931	3.89964		9.86404	8.17584	3.15491		84.43±8.98	91.11±7.57	109.73±3.32		10.64	8.31	3.02
416	Emamectin benzoate	0.005	5.59932	8.84577	5.96534		5.69679	7.79398	6.30955		122.63±9.02	95.64±6.44	99.83±5.16		7.36	6.73	5.17
417	N4-phthalylsulfathiazole	0.5	8.9945	13.3145	3.48684		8.40659	11.377	5.63252		101.42±9.07	100.7±10.23	92.25±5.13		8.94	10.16	5.56
418	Pyrisoxazole	0.01	6.00027	4.2171	1.92616		7.30833	4.87155	2.33816		89.55±9.12	98.64±3.72	102.97±1.7		10.18	3.77	1.65
419	Tebupirimfos	0.01	6.62775	16.0238	7.65812		8.64998	15.9362	5.69984		78.05±9.18	75.73±6.53	91.57±3.39		11.76	8.62	3.7
420	Cyanofenphos	0.01	4.38603	4.71177	7.82235		6.63897	6.60816	6.51177		69.24±9.21	79.06±7.1	79.34±2.9		13.3	8.98	3.65
421	Mapenterol Hydrochloride	0.01	6.47988	4.41649	2.84682		5.71933	3.72877	2.73481		78.36±9.25	86.13±4.94	98.34±3.75		11.8	5.74	3.81
422	Chlorthiophos	0.01	3.25407	3.78585	6.65356		5.45437	3.62623	5.44369		103.42±9.48	106.53±3.44	111.68±6.35		9.17	3.23	5.69
423	Sulfasalazine	0.5	5.49119	2.90812	4.27702		8.05612	7.82217	4.21421		85.25±9.53	86.86±4.21	96.44±4.31		11.18	4.84	4.47
424	Mepanipyrim	0.01	3.54343	2.93471	1.70077		6.75189	2.60885	2.46552		90.75±9.59	94.92±0.63	105.63±5.78		10.57	0.66	5.48
425	Norfloxacin	5	N/A	4.7121	5.9275		N/A	7.11699	6.66837		N/A	75.87±4.43	80.3±8.12		N/A	5.84	10.11
426	Isoproturon	0.05	6.79537	5.33267	2.83487		7.74324	5.13025	3.08173		87.63±9.6	98.87±6.45	102.89±0.94		10.96	6.52	0.91
427	Amidosulfuron	0.05	5.31914	3.32587	5.27321		7.47764	5.27643	4.38169		86.14±9.76	90.48±5.26	100.53±3.35		11.33	5.81	3.33
428	Difenoconazole	0.005	3.59001	2.25762	1.74422		3.76887	2.37508	2.06215		99.75±9.85	98.02±1.26	100.45±1.23		9.87	1.28	1.22
429	Oseltamivir	0.05	6.56833	3.65186	4.2152		8.63198	6.06215	4.96103		97.07±9.9	97.09±6.85	97.7±6.68		10.2	7.05	6.84
430	Josamycin	0.05	9.51154	4.23413	4.27759		11.9044	6.41152	4.70038		98.77±9.96	89.58±9.36	101.53±11.38		10.09	10.45	11.21
431	Testosterone propionate	0.5	1.34722	3.37555	3.01833		6.08395	4.82086	2.35206		107.16±10.03	94.36±3.52	104.8±2.92		9.36	3.73	2.78
432	Ethopabate	0.01	4.90209	1.46571	1.40591		3.64464	2.13689	1.65257		91.05±10.04	100.39±3.15	105.25±3.01		11.03	3.14	2.86
433	Cycloxydim	0.05	5.13517	6.46376	1.91962		4.38812	5.57862	2.98124		93.49±10.05	93.65±6.86	102.54±1.74		10.75	7.33	1.7
434	Propanil	0.01	12.6869	3.95696	2.64244		9.25302	5.74638	2.26276		95.02±10.08	94.63±3.43	104.01±5.6		10.61	3.63	5.38
435	Oxfendazole	0.05	8.54902	3.93339	2.35293		8.7845	3.53431	2.35895		89.44±10.11	98.64±3.02	101.57±2.57		11.31	3.06	2.53
436	Sulindac	0.05	3.44239	1.7002	2.50773		5.20478	3.37249	2.28832		87.67±10.15	92.73±4.61	106.92±3.1		11.58	4.98	2.9
437	Gestrinone	0.05	6.47203	4.45038	2.97437		5.7276	4.69149	3.39662		90.34±10.16	90.54±3.99	101.33±8.24		11.25	4.4	8.14
438	Fenpropimorph	0.01	8.45822	10.914	5.25809		8.28921	9.09832	4.50704		82.33±10.19	84.55±3.21	93.55±4.5		12.38	3.79	4.81
439	Triasulfuron	0.005	3.55841	3.34247	2.7921		6.99034	4.67912	2.26071		98.07±10.25	91.71±4.24	105.93±2.75		10.45	4.62	2.59
440	Naproanilide	0.01	7.19125	4.55853	2.20723		6.10173	3.76655	2.80127		94.88±10.25	96.71±3.53	104.07±7.14		10.8	3.65	6.86
441	Cloransulam-methyl	0.5	10.1769	13.5375	4.12841		11.227	20.8043	14.0972		103.14±10.36	94.98±6.85	109.4±8.15		10.04	7.21	7.45
442	Pretilachlor	0.01	4.13992	6.30818	1.91069		4.79728	8.65974	2.06711		82.85±10.37	84.83±11.9	88.26±1.86		12.51	14.03	2.1
443	Siduron	0.05	11.983	2.76576	1.60396		8.83817	5.61827	2.57244		94.96±10.48	88.08±4.16	105.62±3.3		11.04	4.72	3.13
444	Atenolol	0.1	8.09018	3.11452	1.99865		8.38356	4.14223	5.54366		94.95±10.49	97.64±2.71	90.16±5.8		11.04	2.77	6.43
445	Hydroxyprogesterone	0.1	6.90791	1.28385	2.47564		5.95991	4.12496	3.83053		85.8±10.54	94±2.82	100.32±4.24		12.28	2.99	4.23
446	Chlorbenzuron	0.01	5.91591	4.15816	1.77303		5.60896	3.87518	2.78782		105.94±10.59	108.25±2.31	110.99±7.94		10	2.13	7.15
447	Promethazine	0.1	6.90696	4.15627	2.29465		7.55727	4.53384	2.96485		80.95±10.6	93.85±3.88	101.79±2.72		13.1	4.14	2.67
448	Benzydamine	0.1	5.32959	9.035	3.54167		7.33377	7.31875	3.65905		105.4±10.63	95.08±4.38	104.13±2.5		10.08	4.61	2.4
449	Norharman	0.1	13.3761	12.1756	4.46955		11.3988	10.7378	6.71342		101.52±10.63	98.51±8.13	115.1±26.62		10.47	8.25	23.13
450	Terfenadine	0.01	6.44509	3.97837	2.67863		6.53439	6.01597	4.31125		113.25±10.68	101.52±2.76	111.63±3.15		9.43	2.72	2.82
451	Etobenzanid	0.01	3.74097	5.31287	2.86539		4.96022	4.51074	3.25777		91.33±10.8	105.97±6.04	111.44±2.4		11.83	5.7	2.15
452	Penfluridol	0.01	7.76787	6.16178	6.91845		7.50228	8.05267	7.445		101±10.84	101.79±6.91	114.69±12.55		10.74	6.79	10.95
453	Vardenafil	0.01	9.86529	2.57911	2.77975		9.41166	5.49868	3.6755		87.94±10.9	95.3±1.68	100.33±3.56		12.4	1.76	3.55
454	Metrafenone	0.01	7.42441	8.24991	5.14128		8.68131	6.71259	6.4005		99.35±11.12	94.09±4.6	101.38±7.64		11.2	4.89	7.53
455	Alachlor	0.05	9.69798	8.22061	3.66491		8.94224	10.2282	4.16909		86.65±11.35	68.38±6.02	85.32±2.97		13.1	8.81	3.48
456	Alloxydim sodium	0.1	9.42185	4.17412	3.08581		9.00049	4.30624	4.34588		84.99±11.55	95.28±3.65	106.96±7.36		13.59	3.83	6.88
457	Fluazifop-butyl	0.05	6.16672	3.2849	4.46527		9.62079	7.72943	3.39412		81.31±11.76	103.36±4.43	111.61±6.59		14.47	4.28	5.91
458	Tribufos	0.01	5.79277	9.02735	17.395		5.38872	12.4099	11.5014		86.86±11.78	80.33±14.7	95.57±7.24		13.56	18.3	7.58
459	Tebufenpyrad	0.01	3.93352	3.09055	1.65906		6.64898	5.04622	1.95209		101.08±11.81	98.81±5.26	103.38±3.31		11.68	5.32	3.2
460	Norflurazon	0.005	4.33802	3.88094	2.80432		7.63268	3.53808	2.34908		85.47±11.81	94.93±3.43	105.53±4.45		13.81	3.61	4.22
461	Minoxidil	0.005	7.15355	6.74757	2.78997		6.31384	6.93665	5.61946		82.53±11.81	94.82±2.76	81.78±6.25		14.32	2.91	7.64
462	Dodine	0.1	7.77642	7.08775	12.7771		8.35514	5.63364	9.15524		96.23±11.82	102.71±2.28	119.1±15.94		12.29	2.22	13.39
463	Diphenhydramine hydrochloride	0.01	6.4255	4.75149	7.60783		5.5307	10.3618	9.5379		74.71±11.83	81.98±16.57	93.72±13.89		15.84	20.22	14.82
464	Metconazole	0.05	11.7649	7.55901	3.32756		9.3753	8.29556	3.49435		92.09±12.28	98.22±11.89	102.76±4.38		13.33	12.1	4.26
465	Simeconazole	0.1	6.80865	7.04848	1.43725		10.3289	6.76885	3.15356		88.27±12.28	98.11±10.01	104.36±2.56		13.91	10.2	2.45
466	Azithromycin	0.5	9.10845	3.90863	7.39044		9.93171	3.74891	8.51607		117.91±12.47	86.91±9.26	86.64±7.36		10.58	10.65	8.49
467	Buprofezin	0.005	2.85195	7.69281	6.99212		6.36925	7.99298	4.89989		101.28±12.48	97.77±7.43	104.99±4.85		12.33	7.6	4.62
468	Paclobutrazol	0.05	6.88408	11.4062	2.21339		9.77902	8.35878	2.63009		90.4±12.5	91.82±6.04	95.38±3.65		13.83	6.58	3.82
469	Cyproconazole	0.01	3.92085	2.79592	2.49745		4.87844	3.86909	2.78505		114.45±12.6	101.76±6.33	101.3±0.57		11.01	6.22	0.57
470	Resmethrin	0.01	6.59907	14.3928	8.68078		7.83395	12.0382	5.98044		95.8±12.67	96.56±13.23	103.02±3.23		13.23	13.7	3.14
471	o-Aminoazotoluene	0.05	5.96923	9.60868	3.70274		8.51041	8.51018	3.95759		92.28±12.71	89.02±6.44	115.19±7.02		13.78	7.23	6.09
472	Picolinafen	0.005	3.40884	1.90052	5.00189		6.27924	8.42347	4.17512		108.48±12.72	97.48±4.21	117.47±7.65		11.73	4.32	6.51
473	Phenylbutazone	0.05	4.88471	2.78312	1.92442		5.65321	6.34051	2.15662		118.73±12.79	98.68±3.17	119.89±2.76		10.77	3.21	2.3
474	Dyphylline	1	N/A	6.28638	6.48967		N/A	11.4419	4.81852		N/A	109.03±3.63	138.37±13.27		N/A	3.33	9.59
475	Matrine	0.01	5.95072	4.40279	1.99386		7.52639	3.72121	4.16075		83.89±12.99	82.8±2.98	100.51±7.19		15.49	3.6	7.16
476	Phenformin	0.05	7.72725	10.6594	3.33653		10.8954	9.60368	6.2628		83.52±13.01	86.32±2.75	82.17±7.42		15.58	3.18	9.03
477	4,4'-Dichlorobenzophenone	0.5	15.7132	7.7259	6.59553		15.5965	6.30514	5.96368		97.16±13.22	90.98±5.63	92.18±5.29		13.6	6.19	5.74
478	Legurame	0.05	6.63582	8.59132	13.4352		7.25944	9.10429	10.3357		94.44±13.27	96.87±13.91	103.65±19.61		14.05	14.36	18.92
479	Benzoylprop-ethyl	0.005	5.2892	23.8546	20.3448		7.34065	23.8161	17.479		73.69±13.52	96.94±21.65	97.78±18.1		18.35	22.33	18.51
480	Spinetoram	0.001	7.00394	4.87452	5.84281		5.43031	8.8957	5.78961		122.94±13.6	100.94±5.52	106.04±9.84		11.06	5.47	9.28
481	Benzophenone	0.5	14.0001	12.9455	5.98776		19.0545	12.1835	6.36336		99.5±13.62	73.1±4.98	79.16±8.23		13.69	6.82	10.39
482	Flamprop-isopropyl	0.005	15.0968	16.269	45.4044		14.8908	22.2778	31.6307		82.49±13.66	107.53±27.14	145.34±40.67		16.56	25.24	27.98
483	Mesosulfuron-methyl	0.005	4.51815	5.35155	2.86304		8.25657	4.04358	2.53007		98.36±13.79	98.11±1.15	96.53±2.96		14.02	1.17	3.07
484	Pyridaben	0.005	14.9096	12.5499	27.0061		18.4566	13.7845	24.9961		79.24±13.8	98.18±17.42	146.24±35.24		17.41	17.74	24.09
485	Tebutam	0.1	13.0971	16.1452	7.08701		11.2374	14.0506	6.11863		77.9±13.95	77.34±6.22	87.14±3.54		17.9	8.04	4.06
486	Chlormadinone Acetate	0.05	15.8643	7.21685	7.37446		15.822	8.15766	6.79521		91.91±14.39	100.31±9.09	104.65±10.72		15.66	9.06	10.24
487	Quinocetone	0.05	10.9255	6.48204	3.38403		12.7031	8.69509	2.31125		74.04±14.5	82.27±2.74	89.48±3.35		19.59	3.33	3.74
488	Isonoruron	0.5	6.71794	5.20609	2.38514		7.04976	5.15589	3.28723		141.06±14.68	100.03±7.66	106.11±3.93		10.41	7.66	3.7
489	Aildenafil	0.1	7.81584	4.90755	3.70668		9.31894	5.67552	3.73495		96.02±15.01	95.94±5.24	95.25±0.98		15.64	5.46	1.02
490	Mandipropamid	0.005	7.35508	16.1052	14.86		7.98357	15.9465	13.0315		88.27±15.15	97.61±9.72	88.05±19.7		17.16	9.96	22.38
491	Pyrimorph	0.05	4.71197	3.06494	1.97074		7.32643	2.68807	1.78981		87.82±15.6	102.04±2.38	102.81±3.56		17.76	2.33	3.47
492	Norethindrone	0.1	18.3141	5.67447	4.57511		18.0622	5.88757	3.11033		93.71±16.89	100.92±10.94	101.17±3.53		18.02	10.84	3.48
493	Ganciclovir	0.05	43.1024	7.64982	8.41651		38.3429	7.63496	10.5904		61.34±17.32	82.59±5.45	91.4±3.99		28.24	6.6	4.36
494	Tulobuterol	0.01	5.18131	2.52474	4.3515		10.5951	13.0408	4.8575		79.55±17.61	86.54±11.2	77.97±3.39		22.13	12.94	4.35
495	4,4'-Methylenebis(2-chloroaniline)	0.5	10.2301	8.48114	1.92913		11.4858	6.78907	2.95074		104.87±17.68	102.51±8.91	103.27±8.74		16.86	8.69	8.46
496	Phorate sulfoxide	0.05	8.70691	6.86736	3.04485		11.1868	8.26797	7.26631		86.44±19.55	104.08±14.24	94.36±8.06		22.62	13.68	8.55
497	Buformin hydrochloride	0.5	7.78366	6.22555	4.84268		12.5974	5.59968	5.94457		107.28±21.03	99.15±10.51	63.65±3.46		19.6	10.6	5.43
498	Thebaine	0.1	14.1118	9.40553	5.6126		30.126	10.0254	3.69583		128.62±25.57	97.14±7.48	116.12±8.71		19.88	7.7	7.5
499	Zilpaterol	0.05	19.9339	4.7207	4.53059		16.6492	5.21742	5.39521		132.55±30.02	92.25±3.96	87.14±8.08		22.65	4.29	9.27
500	Voglibose	1	N/A	4.75595	1.32938		N/A	6.43883	4.38765		N/A	87.24±2.42	87.74±1.23		N/A	2.77	1.4
501	Chlormequat chloride	5	N/A	6.1652	3.22325		N/A	6.46068	5.05485		N/A	72.51±1.48	80.32±6.25		N/A	2.04	7.78
502	Danofloxacin	1	N/A	4.70783	1.87227		N/A	9.04014	3.04428		N/A	84.64±4.58	86.61±1.56		N/A	5.41	1.8
503	Ethoxyquin	5	N/A	12.6343	8.77366		N/A	13.8403	9.57544		N/A	64.09±2.87	75.14±6.14		N/A	4.47	8.17
504	Ethyl 4-dimethylaminobenzoate	5	N/A	9.11747	7.4513		N/A	15.4863	7.26509		N/A	79.82±7.19	96.26±4.57		N/A	9.01	4.75
505	Propetamphos	1	N/A	16.6073	6.00501		N/A	12.2747	9.744		N/A	87.64±9.66	91.05±15.46		N/A	11.02	16.98
506	Fluthiacet-methyl	0.005	7.65447	5.83511	5.79169		7.51708	8.42181	11.405		68.02±3.86	81.38±5.74	107.93±8.7		5.67	7.06	8.06
507	Dimethenamid	0.001	5.72151	7.11867	3.49252		6.19896	9.29901	2.64278		68.43±2.12	85.51±7.69	90.13±0.99		3.1	8.99	1.1
508	Arsanilic acid	0.05	3.27575	5.98584	11.1921		9.06765	16.8649	11.3584		78.14±4.95	94.39±5.1	77.77±2.74		6.33	5.4	3.52
509	Sulfapyrazole	0.01	7.83571	4.83139	2.17804		7.65643	5.50265	2.54951		78.64±5.12	90.73±7.79	108.38±4.16		6.51	8.58	3.84
510	Pazufloxacin mesilate	0.1	9.38285	2.75756	2.7126		13.7618	4.29741	4.67579		80.82±11.82	85.21±5.13	96.7±7.14		14.62	6.02	7.38
511	Metribuzin	0.1	7.75065	4.53007	3.10741		7.04047	4.93374	4.72407		81.45±6.02	86.45±4.62	92.9±4.18		7.4	5.34	4.5
512	Clenbuterol	0.01	4.09757	3.35845	1.7517		7.16788	7.90227	7.10012		81.56±6.52	102.48±11.5	81.87±4.67		8	11.22	5.7
513	Flumequine	0.005	0.846248	3.25578	5.731		3.53759	2.46115	4.86361		81.61±3.66	88.24±2.47	100.72±2.3		4.48	2.8	2.28
514	Mevinphos	0.1	9.02942	13.6604	6.77275		7.67807	12.2137	5.76816		82.48±11.21	80.98±9.72	116.48±22.97		13.6	12	19.72
515	Brombuterol	0.01	9.15165	10.418	3.31527		9.42649	8.91365	4.11781		83.86±2.96	85.86±6.96	92.64±5.57		3.53	8.11	6.01
516	Perphenazine	0.01	7.39539	5.06457	3.12945		6.9476	7.19664	4.63567		83.88±7.76	88.4±6.75	95.12±2.2		9.26	7.64	2.32
517	Bromperidol	0.005	6.60283	4.50457	7.42731		5.70717	4.76816	5.35739		83.95±0.88	96.04±6.9	100.37±1.7		1.05	7.19	1.69
518	Isoxsuprine	0.01	7.41401	10.0645	1.41041		5.88283	7.48888	2.59738		84.63±7.79	90.47±1.68	99.54±2.95		9.21	1.86	2.96
519	Vildagliptin	0.05	4.7137	6.34301	6.49322		5.37185	7.05157	5.80564		84.75±7.17	85.88±9.3	83.35±9.79		8.45	10.82	11.75
520	Arformoterol Tartrate	0.01	3.89712	7.19557	2.52348		5.21522	5.6185	2.9406		86.02±5.41	92.1±2.62	100.88±6.42		6.28	2.84	6.36
521	Tebuthiuron	0.001	3.26702	1.60954	2.75695		2.72765	3.45983	2.98863		86.32±2.57	93.89±2.63	103.76±1.26		2.98	2.8	1.22
522	Cimaterol	0.05	26.9948	7.83179	5.87822		18.7775	9.39151	16.0984		86.61±8.22	89.98±9.31	90.05±6.87		9.49	10.34	7.63
523	Griseofulvin	0.01	7.74211	4.9624	1.30623		5.99201	5.20351	1.89843		86.96±7.86	99.42±2.54	104.19±4.51		9.04	2.56	4.33
524	Fensulfothion-oxon-sulfone	0.005	4.16517	5.38723	3.1223		5.46802	4.5888	3.50954		87.05±8.14	92.58±4.64	103.33±6.4		9.36	5.01	6.19
525	Methyltestosterone	0.01	8.91582	9.13007	4.03092		6.62537	7.6347	4.79934		87.56±13.21	93.35±5.16	104.98±4.53		15.09	5.52	4.32
526	Epoxiconazole	0.005	5.78129	5.27107	1.69563		4.12664	4.74879	3.26997		88.27±2.67	90.35±2.65	106.92±3.27		3.02	2.93	3.06
527	Aminocyclopyrachlor	0.05	7.39129	4.25452	0.962763		5.95259	2.95982	1.25359		88.43±5.2	97.22±1.9	100.09±1.97		5.88	1.95	1.96
528	Haloperidol	0.005	5.26092	4.3232	3.21746		4.08441	3.56559	2.77602		89.21±4.1	95.98±3.66	103.22±3.44		4.6	3.81	3.33
529	Fenbendazole	0.01	4.27589	3.99556	1.87949		4.45428	4.55816	3.83739		89.77±2.34	93.53±3.62	100.68±4.66		2.61	3.87	4.63
530	Metalaxyl	0.001	4.09124	2.31924	2.15273		3.26153	2.8574	2.15069		90.24±4.52	98.17±1.39	107.59±1.49		5.01	1.42	1.39
531	Megestrol acetate	0.01	8.64365	7.06332	2.66436		6.20093	5.22017	6.40545		90.5±3.14	99.31±5.2	104.06±8.45		3.47	5.23	8.12
532	2-Ethylhexyl 4-(dimethylamino)benzoate	0.01	4.01601	6.96866	11.7413		4.13546	5.97985	8.31633		90.69±5.18	86.84±3.53	109.55±8.7		5.71	4.07	7.94
533	Penconazole	0.005	4.43552	2.46093	1.72879		6.12254	3.12559	2.57699		90.79±9.45	94.71±1.56	107.45±3.47		10.41	1.65	3.23
534	Cyproheptadine	0.005	4.46121	7.50043	3.60591		7.41748	5.97585	3.92924		91.25±8.6	92.48±6.03	103.45±2.85		9.43	6.52	2.75
535	Acetamiprid	0.1	2.27178	10.8703	36.5405		25.6216	29.1003	43.7589		91.98±8.6	112.74±33.12	83.55±16.21		9.35	29.38	19.4
536	Diaveridine	0.005	4.37717	9.54858	2.38272		5.90207	10.222	7.97662		92.19±4.82	98.22±4.9	96.34±7.48		5.22	4.98	7.77
537	Terbumeton	0.01	3.5569	2.21287	1.77123		4.52428	3.19499	1.59492		92.29±6.04	98.65±2.31	102.03±1.71		6.54	2.34	1.68
538	Ametoctradin	0.005	2.65226	3.4684	2.11696		2.86573	2.91908	1.75308		92.75±6.78	93.34±1.86	94.02±1.95		7.31	1.99	2.07
539	Metobromuron	0.01	4.40732	2.80426	3.24326		3.91051	3.02142	3.02554		93.05±8.03	93.53±3.74	101.73±4.28		8.63	4	4.21
540	Sarafloxacin	0.1	7.01214	3.08694	2.30751		7.9855	5.66325	2.82369		93.32±13.65	84.12±3.83	109.04±3.29		14.62	4.56	3.01
541	Metoprolol	0.01	5.22611	4.6312	11.4255		8.87389	11.3322	10.6831		93.83±4.37	97.14±5.36	100.1±4.74		4.66	5.52	4.73
542	2-Hydroxy-4-methoxybenzophenone	0.05	9.17534	3.70627	2.50461		8.49577	5.29684	2.95745		93.99±11.2	91.99±6.11	98.48±2.27		11.91	6.65	2.3
543	Gatifloxacin	0.5	7.68308	9.1721	3.05345		7.03544	8.85086	3.37026		94.2±10.68	81.45±8.38	87.56±0.99		11.34	10.29	1.13
544	Ethametsulfuron-methyl	0.001	4.09732	2.07801	2.82781		4.74591	3.77401	3.32309		94.76±5.61	92.16±5.53	98.56±2.88		5.92	6	2.92
545	Bensulfuron methyl	0.005	7.64016	4.77529	2.4626		7.39415	5.07277	2.59033		94.79±7.07	97.44±5.64	101.03±1.95		7.46	5.79	1.93
546	Fenamiphos	0.001	1.61688	3.16574	2.6364		2.81119	3.84305	2.32511		95.06±1.11	92.51±5.11	104.82±0.91		1.17	5.52	0.87
547	Validamycin	0.01	4.72977	7.52121	8.3618		8.62994	6.78134	9.76078		95.28±10.39	92.17±6.25	85.11±11.39		10.9	6.79	13.39
548	Flumorph	0.001	6.26066	2.45124	1.72663		6.6233	3.32411	2.47322		95.67±7.65	95.16±1.44	108.86±2.62		7.99	1.51	2.41
549	Isopyrazam	0.005	3.0549	3.22926	5.02786		3.94277	2.81875	3.66888		96.03±5.91	97.07±3.77	100.99±5.41		6.16	3.89	5.36
550	Oxfendazole-Sulfone	0.01	3.33742	4.2868	2.96283		7.16085	3.90898	3.27334		96.8±4.57	98.24±6.86	98.91±3.58		4.72	6.99	3.62
551	Clindamycin	0.005	7.9093	6.75943	2.80376		6.63429	4.38376	2.79541		96.98±8.24	102.81±5.11	110.33±6.47		8.5	4.97	5.86
552	Clenpenterol hydrochloride	0.01	4.71249	5.2066	2.04224		4.27014	4.5417	2.14808		97.41±6.05	89.53±10.15	93.46±3.08		6.21	11.34	3.3
553	Disulfoton-sulfoxide	0.005	6.00011	10.3086	11.4402		10.3257	9.21753	11.0255		99.79±15.56	99.09±10.6	108.03±20.33		15.6	10.7	18.82
554	Desloratadine	0.05	4.60302	8.55803	6.29402		5.54472	6.67714	4.89057		100.67±14.55	94.25±3.72	96.5±7.67		14.45	3.95	7.94
555	Trifloxystrobin	0.005	7.19408	4.50564	3.56645		6.67637	5.34691	3.79558		101.17±7.12	99.04±4.97	101.08±6.11		7.03	5.02	6.05
556	Butyl methoxydibenzoylmethane	0.5	5.92192	6.73277	8.79382		8.51144	7.30642	6.37892		101.67±7.5	92.09±5.04	90.55±1.01		7.38	5.47	1.11
557	3-O-methyl-Colterol	0.05	5.63221	8.21405	2.87535		8.04122	9.11593	8.84357		104.85±8.05	103.08±11.24	95.69±6.27		7.68	10.91	6.55
558	Fleroxacin	0.1	7.23778	5.31972	2.79411		6.72271	5.63409	2.83628		105.75±6.15	86.24±10.32	95.54±6.03		5.81	11.97	6.32
559	Spirotetramat ketohydroxy	0.01	9.54136	7.96874	7.82112		12.4384	6.36562	13.9485		106.07±14.72	99.86±10.82	110.21±15.01		13.88	10.83	13.62
560	Sparfloxacin	0.05	5.94263	5.19539	2.37693		4.83576	5.27562	2.22297		109.52±5.35	80.5±5.31	90.8±3.32		4.89	6.6	3.66
561	Piroxicam	0.05	3.33407	10.6802	2.95655		8.68206	8.17942	4.81616		110.35±11.83	95.58±14.9	93.48±1.99		10.72	15.59	2.13
562	Irbesartan	0.01	3.16193	1.74786	1.55989		3.17379	3.47478	3.11979		111.92±4.49	96.77±1.94	105.04±4.28		4.01	2.01	4.08
563	Hydroxyprogesterone caproate	0.5	7.69396	5.56102	4.97625		5.41204	7.27631	9.60563		112.74±6.53	84.21±2.86	97.31±15.06		5.79	3.4	15.48
564	Gliclazide	0.01	4.32056	1.7039	2.11812		4.02704	6.13602	2.55668		124.76±2.21	108.63±2.53	111.65±4.11		1.77	2.33	3.68
565	Megestrol	0.1	6.5952	6.82957	3.25821		5.89412	8.77979	5.40963		127.29±8.09	84.05±8.52	103.11±7.35		6.35	10.14	7.13
566	Enrofloxacin	0.01	8.90843	4.53315	5.23269		12.9511	7.17059	9.55475		139.87±14.2	95.07±11.72	88.6±10.22		10.15	12.33	11.54
567	3,4,5-Trimethylphenyl methylcarbamate	5	N/A	9.27922	7.33755		N/A	8.33791	4.9749		N/A	87.14±5.52	93.91±7.1		N/A	6.34	7.56
568	clinafoxacin,HCl	1	N/A	6.43746	10.4294		N/A	7.06001	12.891		N/A	80.86±9.23	90.4±10.24		N/A	11.42	11.32
569	Dinitramine	1	N/A	6.25263	2.08103		N/A	7.49237	5.25288		N/A	92.82±10.36	102.93±11.38		N/A	11.16	11.06
570	Diphenylamine	1	N/A	11.414	4.05042		N/A	13.3976	8.05272		N/A	91.83±9.58	82.15±3.06		N/A	10.43	3.73
571	Moxifloxacin	1	N/A	9.04636	4.89717		N/A	6.65332	5.18909		N/A	68.92±5.34	82.22±5.03		N/A	7.74	6.12
572	MQCA	1	N/A	6.978	9.12439		N/A	8.52155	9.3826		N/A	84.59±2.93	82.37±10.51		N/A	3.46	12.76
573	Nitrendipine	1	N/A	11.1345	7.0311		N/A	14.2235	7.78119		N/A	75.6±8.3	93.5±9.05		N/A	10.98	9.68
574	Propamocarb	1	N/A	14.5951	4.73719		N/A	14.338	7.76441		N/A	82.45±12.51	67.78±7.68		N/A	15.17	11.32

## Sheet: Supplementary Data 7
Supplementary Data 7. Linear Regression and accuracy of serum-spiked exposures.
ID	Name	Isotope labeled internal standard	R2	LLOQ (ng/mL)	ULOQ (ng/mL)		Accuracy
							L (0.5 ng/mL)	L-RSD (%)	M (5 ng/mL)	M-RSD (%)	H (50 ng/mL)	H-RSD (%)
1	Thiacloprid	Propazine-d14	0.99716	0.001	50		101.16±0.92	0.906076	108.55±1.73	1.58972	94.52±1.77	1.87708
2	Fipronil	Fipronil-13C2-15N2	0.99941	0.0025	50		92.39±2.59	2.8084	98.87±1.84	1.85669	96.17±0.61	0.634315
3	Fipronil-sulfide	Sodium Perfluorooctanesulfonate-1,2,3,4-13C4	0.99997	0.0025	100		96.49±2.22	2.29943	106.18±2.15	2.02785	109.05±1.93	1.77248
4	Mesulfenfos	Coumaphos-d10-3	0.9975	0.0025	25		99.32±4.9	4.93451	103.26±1.8	1.74006	85.41±1.82	2.12925
5	Difenoconazole	Prometryne-d4	0.99969	0.0025	100		86.38±2.61	3.02012	94.22±2.42	2.56421	105.46±2.31	2.19277
6	Diphenamid	Propazine-d14	0.99593	0.0025	100		97.69±0.89	0.911447	108.92±4.01	3.6837	106.04±2.45	2.31135
7	Flufenoxuron	Prometryne-d4	0.99839	0.0025	50		71.58±2.44	3.4136	90.65±2.66	2.9291	109.08±3.35	3.07494
8	Quinoxyfen	Prometryne-d4	0.99761	0.0025	10		88.99±1.77	1.98682	103.21±3.3	3.19704	121.28±1.65	1.36179
9	Pioglitazone hydrochloride	Coumaphos-d10-3	0.99507	0.0025	50		96.48±2.93	3.03749	103.08±2.64	2.56359	92.02±2.06	2.23456
10	Chloro-3-oxa-perfluorononanesulfonic acid	Sodium Perfluorooctanesulfonate-1,2,3,4-13C4	0.99291	0.005	100		98.23±2.3	2.34588	106.77±1.57	1.46793	103.82±1.93	1.85545
11	Fipronil sulfone	Sodium Perfluorooctanesulfonate-1,2,3,4-13C4	0.99931	0.005	50		88.37±1.1	1.24655	92.99±1.12	1.20625	92.39±1.01	1.09524
12	Lufenuron	Perfluorooctanoic acid-1,2,3,4-13C4	0.99943	0.005	100		89.62±2.98	3.32616	93.98±3.13	3.32941	100.59±5.76	5.72152
13	Michlersketone	Prometryne-d4	0.99965	0.005	25		107.41±2.67	2.48365	108.45±2.06	1.90165	91.18±2.39	2.6188
14	Fluopyram	Myclobutanil-d9-2	0.99847	0.005	50		93.59±2.91	3.10979	99.48±3.4	3.41952	89.01±1.89	2.12705
15	Isofenphos oxon	Prometryne-d4	0.99954	0.005	50		94.15±3.38	3.59476	104.8±3.91	3.72747	103.24±2.67	2.58425
16	Spirotetramat-enol	Prometryne-d4	0.99963	0.005	10		96.21±2.64	2.74794	103.09±2.9	2.8107	88.23±1.8	2.04305
17	Bis[2-(perfluorohexyl)ethyl] phosphate	Sodium Perfluorododecanate-13C2	0.99391	0.01	100		86.29±2.77	3.21295	92.68±5.42	5.84893	95.92±8.43	8.78471
18	Fipronil Desulfinyl	Sodium Perfluorooctanesulfonate-1,2,3,4-13C4	0.99942	0.01	10		96.5±1.51	1.56714	105.42±2.3	2.18378	113.08±1.48	1.30769
19	Fluxapyroxad	Sodium Perfluorooctanesulfonate-1,2,3,4-13C4	0.99962	0.01	100		99.86±1.99	1.99196	111.88±2.85	2.55145	109.21±0.89	0.81754
20	Halosulfuron-methyl	Perfluorooctanoic acid-1,2,3,4-13C4	0.99948	0.01	25		108.01±6.28	5.81059	105.79±2.54	2.40048	73.76±8.09	10.9671
21	Isocarbophos	Perfluorooctanoic acid-1,2,3,4-13C4	0.99933	0.01	25		101.83±2.98	2.9238	103.07±4.39	4.26161	77.77±4.61	5.93006
22	Nicarbazin	Perfluoroundecanoic acid-13C2	0.9996	0.01	100		83.6±2.75	3.28673	93.5±5.13	5.48339	97.95±3.65	3.72834
23	Perfluoroundecanoic acid	Sodium Perfluorooctanesulfonate-1,2,3,4-13C4	0.99629	0.01	100		99.35±3.63	3.65777	102.42±5.18	5.06087	108.05±1.6	1.47801
24	Sulfanitran	Perfluorooctanoic acid-1,2,3,4-13C4	0.99354	0.01	25		101.63±3.09	3.03942	102.88±2.59	2.52092	77.63±5.64	7.26337
25	Crufomate	Metalaxyl-d6	0.99982	0.01	100		91.42±1.95	2.13443	93.75±3.05	3.2487	101.99±3.28	3.21939
26	Fensulfothion-Sulfone	Coumaphos-d10-3	0.99892	0.01	25		97.72±3.43	3.51116	99.78±1.99	1.99591	90.19±2.21	2.45523
27	Fluazuron	Prometryne-d4	0.99988	0.01	10		81.01±2.76	3.40962	93.76±2.86	3.05182	115.51±4.04	3.49406
28	Glyburide	Prometryne-d4	0.99815	0.01	50		96.45±5.88	6.09543	107.42±1.37	1.27542	99.91±3.6	3.5998
29	Loratadine	Clenbuterol-d9	0.99705	0.01	50		109.36±3.09	2.82244	108.94±6.46	5.92591	109.75±4	3.64861
30	Secbumeton	Prometryne-d4	0.99985	0.01	25		97.86±2.24	2.29265	99.2±3.03	3.05054	81.61±1.19	1.45565
31	Trimethoprim	Prometryne-d4	0.99673	0.01	25		81.52±1.95	2.38741	88.44±1.07	1.20893	93.72±0.85	0.912206
32	Sethoxydim	Prometryne-d4	0.99815	0.01	100		96.4±1.63	1.69341	103.76±1.71	1.65102	99.15±1.42	1.43354
33	Pyraclostrobin	Prometryne-d4	0.99966	0.01	25		94.34±2.48	2.63152	103.09±1.51	1.46264	83.75±1.11	1.32811
34	Pentacosafluorotridecanoic acid	Perfluorononanoic acid-13C5	0.99678	0.025	50		86.9±7.38	8.49289	83.13±8.92	10.7321	89.04±6.94	7.79072
35	Perfluorohexanesulfonate (PFHxS)	Perfluorooctanoic acid-1,2,3,4-13C4	0.99797	0.025	100		94.87±10.48	11.0442	116.42±5.55	4.76719	119.4±7.4	6.20169
36	Perfluorononanoic acid	Triclosan-13C12	0.99963	0.025	100		101.17±5.67	5.59987	105.91±2.3	2.16712	112.4±4.57	4.06927
37	2,4-Diethyl-9H-thioxanthen-9-one	Prometryne-d4	0.99908	0.025	10		86.67±1.65	1.90812	95.63±0.92	0.958939	113.46±1.88	1.65267
38	Chlorbenzuron	Coumaphos-d10-3	0.99966	0.025	50		84.45±2.42	2.86192	90.02±2.3	2.55114	99.73±2.42	2.42931
39	Diethyltoluamide	Propazine-d14	0.99731	0.025	50		105.27±3.47	3.29963	99.92±3.73	3.73794	93.09±1.45	1.55568
40	4-Chloro-5-(p-tolyl)-1H-imidazole-2-carbonitrile	Prometryne-d4	0.99925	0.025	100		93.69±5.09	5.43286	94.7±2.72	2.87509	101.08±2.25	2.22653
41	Carbamazepine	Coumaphos-d10-3	0.9998	0.025	100		82.75±1.26	1.52612	89.74±1.83	2.03393	95.78±1.68	1.75822
42	Cetirizine hydrochloride	Myclobutanil-d9-2	0.99937	0.025	100		84.52±2.95	3.48854	96.21±1.9	1.97138	102.73±3.62	3.52564
43	Chlorantraniliprole	Prometryne-d4	0.99823	0.025	25		103.06±6.04	5.86259	103.97±4.26	4.09499	89.82±2.49	2.76755
44	Diclofenac Acid	Prometryne-d4	0.99885	0.025	25		94.01±7.95	8.45936	92.9±1.92	2.06804	105.9±2.85	2.69212
45	Diphenhydramine hydrochloride	Myclobutanil-d9-2	0.99891	0.025	100		82.89±2.91	3.51371	91.48±1.26	1.37769	91.71±3.91	4.26589
46	Flumequine	Coumaphos-d10-3	0.99409	0.025	50		101±0.94	0.932606	110.28±4.9	4.44248	92.99±2.9	3.11847
47	Irbesartan	Prometryne-d4	0.99824	0.025	50		98.02±3.56	3.63391	101.58±4.54	4.47294	95.79±2.72	2.83952
48	Resmethrin	Prometryne-d4	0.99991	0.025	10		81.59±2.26	2.76649	100.57±2.35	2.34007	107.89±3.69	3.42457
49	Roxithromycin	Prometryne-d4	0.99043	0.025	10		87.36±1.79	2.04573	99.83±4.35	4.35405	103.08±6.94	6.73037
50	Phenylbutazone	Myclobutanil-d9-2	0.99603	0.025	100		94.56±7.16	7.57067	102.32±2.68	2.62229	98.49±4.55	4.61717
51	Prochloraz-desimidazole-amino	Prometryne-d4	0.9988	0.025	50		92.23±4.82	5.22941	95.87±3.83	3.99171	105.6±2.68	2.53382
52	Prochloraz desimidazole-formylamino	Prometryne-d4	0.99912	0.025	50		98.52±7.2	7.30352	98.13±3.28	3.34093	98.08±3.13	3.19239
53	Imibenconazole	Prometryne-d4	0.99795	0.025	50		84.44±2.37	2.80806	83±3.52	4.2402	100.92±2.94	2.91427
54	Thiobencarb	Prometryne-d4	0.99777	0.025	100		85.08±2.63	3.09017	90.97±5.25	5.7659	88.66±2.51	2.83218
55	Tadalafil	Prometryne-d4	0.99886	0.025	100		90.74±5.99	6.59875	97±2.91	2.99802	93.82±2.29	2.44055
56	Cyclamic acid	Triclosan-13C12	0.99181	0.05	100		98.67±5.55	5.62484	96.64±4	4.1345	122.62±5.22	4.25785
57	Flunixin	Sodium Perfluorohexanesulfonate-18O2	0.99859	0.05	100		95.05±4.63	4.87492	99.75±2.5	2.50435	103.2±4.96	4.80288
58	Perfluorododecanoic acid	Perfluorooctanoic acid-1,2,3,4-13C4	0.99562	0.05	25		88.36±3.75	4.24692	88.83±7.42	8.35374	115.17±4.86	4.21843
59	Perfluoroheptanesulfonic acid	Perfluorooctanoic acid-1,2,3,4-13C4	0.99904	0.05	10		97.87±2.72	2.78198	98.37±3.35	3.41017	108.68±1.76	1.61952
60	Perfluoroheptanoic acid	Perfluorononanoic acid-13C5	0.99904	0.05	100		90.29±1.82	2.01341	92.21±2.69	2.92144	95.92±3.29	3.43469
61	Sulfoxaflor	Sodium Perfluorooctanesulfonate-1,2,3,4-13C4	0.99915	0.05	50		100.09±3.19	3.18321	106.28±2.3	2.16588	92.82±4.47	4.81747
62	Tolbutamide	Perfluorooctanoic acid-1,2,3,4-13C4	0.99853	0.05	10		95.54±7.15	7.48841	95.77±3.01	3.14319	107.56±3.55	3.3006
63	Hydroxyprogesterone caproate	Prometryne-d4	0.99899	0.05	100		99.91±8.7	8.70884	97.13±2.23	2.29651	103.19±1.64	1.58885
64	2-Ethylhexyl 4-(dimethylamino)benzoate	Prometryne-d4	0.99652	0.05	10		88.87±3.67	4.12521	96.98±2.45	2.52703	107.6±4.13	3.84273
65	4,4'-Bis(diethylamino)benzophenone	Prometryne-d4	0.99831	0.05	50		97.55±2.8	2.87073	99.8±1.92	1.92437	105.01±3.13	2.98321
66	Boscalid	Myclobutanil-d9-2	0.99733	0.05	100		96.89±6.75	6.96549	100.06±2.66	2.65352	92.13±1.28	1.39269
67	Chlorpheniramine maleate	Prometryne-d4	0.9964	0.05	100		98.75±3.66	3.70451	103.9±2.14	2.06311	99.18±2.56	2.57856
68	Matrine	Prometryne-d4	0.99886	0.05	10		92.24±6	6.50984	89.6±3.86	4.31161	113.38±4.73	4.17126
69	RhodamineB	Prometryne-d4	0.9996	0.05	50		94.04±8.76	9.31409	96.97±9.62	9.91972	104.22±1.12	1.07085
70	Rabenzazole	Metalaxyl-d6	0.99777	0.05	100		95.15±1.72	1.80671	102.39±0.86	0.835337	102.35±1.71	1.6739
71	tert-Butylphenyl diphenyl phosphate	Prometryne-d4	0.99378	0.05	25		100.8±2.13	2.11363	113.27±1.76	1.55597	116.33±1.11	0.956064
72	Pyrazophos	Clenbuterol-d9	0.99975	0.05	50		86.91±6.17	7.09534	85.21±4.59	5.38966	120.07±2.52	2.10181
73	Salmeterol	Propazine-d14	0.99926	0.05	100		88.58±1.52	1.7132	92.48±4.14	4.47927	96.76±2.96	3.06302
74	2,4,5-Trichlorophenoxyacetic acid	Sodium Perfluorooctanesulfonate-1,2,3,4-13C4	0.99819	0.1	100		85.6±11.29	13.1861	88.77±2.28	2.57134	98.43±3.34	3.39664
75	Butylparaben	Perfluorooctanoic acid-1,2,3,4-13C4	0.99708	0.1	25		96.26±3.29	3.41857	86.85±3.61	4.16041	111.98±2.1	1.87531
76	Isoxaflutole	Sodium Perfluorooctanesulfonate-1,2,3,4-13C4	0.99791	0.1	100		106.13±10.6	9.98876	108.77±2.21	2.02842	104.71±3.57	3.40962
77	Androstenedione	Propazine-d14	0.99825	0.1	10		102.21±8.61	8.42105	103.98±1.5	1.43883	108.07±3.07	2.84283
78	Bis(2-butoxyethyl) phthalate	Prometryne-d4	0.99311	0.1	50		101.59±10.19	10.0254	108.81±4.56	4.19359	98.25±7.21	7.33451
79	Bisphenol A bis(diphenyl phosphate)	Prometryne-d4	0.99378	0.1	25		84.48±8.01	9.48614	73.85±5.13	6.9431	112.67±2.22	1.97344
80	Hydroxyprogesterone	Metalaxyl-d6	0.99788	0.1	50		105.99±7.42	7.00354	94.36±3.35	3.54861	108.87±1.72	1.57739
81	Betaxolol	Coumaphos-d10-3	0.99876	0.1	50		84.17±3.32	3.94244	84.57±1.11	1.31477	104.07±2.24	2.15257
82	Brombuterol	Coumaphos-d10-3	0.99975	0.1	50		87.87±2.78	3.16899	87.47±1.28	1.46604	101.69±3.14	3.08462
83	Erythromycin	Prometryne-d4	0.99716	0.1	100		99.19±4.57	4.60593	102.55±7.11	6.93243	92.38±5.65	6.11448
84	Minoxidil	Clenbuterol-d9	0.99704	0.1	100		112.1±3.94	3.51736	107.67±5.01	4.65461	67.49±3.64	5.39773
85	Myclobutanil	Prometryne-d4	0.99895	0.1	50		92.36±7.47	8.08507	103.96±3.03	2.91018	98.67±1.41	1.43284
86	Noscapine	Prometryne-d4	0.9979	0.1	100		86.99±4.68	5.38392	92.12±2.57	2.79012	104.26±2.93	2.80636
87	Progesterone	Myclobutanil-d9-2	0.99552	0.1	50		100.08±5.38	5.37597	101.47±1.54	1.51871	94.52±1.72	1.8178
88	Promethazine	Prometryne-d4	0.99924	0.1	100		92.2±3.76	4.07469	90.47±2.95	3.2654	99.18±2.88	2.90871
89	Quinocetone	Prometryne-d4	0.99365	0.1	50		104.74±10.58	10.1033	105.02±5.38	5.12689	99.16±4.52	4.56202
90	Ganciclovir	Prometryne-d4	0.999	0.1	100		107.92±11.04	10.2295	93.76±2.89	3.08259	104.09±2.33	2.2426
91	Paclobutrazol	Prometryne-d4	0.99408	0.1	25		102.12±3.75	3.66995	101.57±1.02	1.00764	109.44±3.48	3.18145
92	Siduron	Prometryne-d4	0.9991	0.1	25		99.17±5.82	5.86541	107.87±5.63	5.21788	87.19±1.15	1.31749
93	Tebuconazole	Prometryne-d4	0.99967	0.1	25		103.32±13.87	13.4279	104.24±2.18	2.08692	92.68±3.25	3.50569
94	4,6-Dinitro-O-cresol	Sodium Perfluorooctanesulfonate-1,2,3,4-13C4	0.99762	0.25	100		111.58±7.37	6.60567	98.25±3.15	3.20691	103.97±1.91	1.83509
95	Bisphenol S	Sodium Perfluorohexanesulfonate-18O2	0.99923	0.25	50		106.93±9.92	9.27912	107.88±3.45	3.19651	94.55±3.32	3.51057
96	Bromacil	Sodium Perfluorooctanesulfonate-1,2,3,4-13C4	0.99823	0.25	100		113.42±5.82	5.13381	91.28±1.58	1.73131	94.8±3.39	3.57809
97	Dimefuron	2,4-D-D3	0.9973	0.25	50		101.87±9.7	9.52023	119.06±7.09	5.95325	95.48±1.22	1.27807
98	Dinoseb	Sodium Perfluorooctanesulfonate-1,2,3,4-13C4	0.99632	0.25	100		105.92±7.63	7.20333	89.59±2.52	2.80946	101.01±2.12	2.10074
99	Estrone	Sodium Perfluorooctanesulfonate-1,2,3,4-13C4	0.99782	0.25	100		107.78±6.31	5.85833	93.31±3.8	4.07692	101.19±2.25	2.21939
100	Ethylparaben	2,4-D-D3	0.99562	0.25	100		64.41±10.65	16.5379	104.54±3.67	3.51276	102.73±3.88	3.78044
101	Hexestrol	Sodium Perfluorooctanesulfonate-1,2,3,4-13C4	0.99904	0.25	100		93.35±8.58	9.19321	89.95±5.62	6.24807	100.89±1.23	1.2143
102	Isobutyl 4-hydroxybenzoate	Sodium Perfluorooctanesulfonate-1,2,3,4-13C4	0.99435	0.25	25		110.58±3.77	3.41141	94.47±2.18	2.31099	105.38±1.03	0.974936
103	Mono(2-ethyl-5-oxohexyl)phthalate	Triclosan-13C12	0.99958	0.25	50		105.03±5.37	5.1125	101.71±6.13	6.02815	93.72±8.13	8.67299
104	Naphthol Yellow S	Perfluorooctanoic acid-1,2,3,4-13C4	0.99746	0.25	100		108.61±6	5.52591	90.6±2.72	3.00405	112.44±11.14	9.90837
105	Perfluorodecanoic acid	Perfluoroundecanoic acid-13C2	0.99809	0.25	100		107.98±2.47	2.28489	95.03±1.56	1.63773	110.46±5.97	5.40474
106	Perfluorooctanoic acid	Perfluorooctanoic acid-1,2,3,4-13C4	0.99281	0.25	25		101.86±3.38	3.31805	89.21±1.77	1.98068	112.69±3.64	3.22704
107	Butyl methoxydibenzoylmethane	Coumaphos-d10-3	0.99733	0.25	50		101.48±5.9	5.81166	83.31±2.41	2.89178	105.85±2.48	2.33945
108	Isonoruron	Metalaxyl-d6	0.9985	0.25	100		104.05±3.06	2.93936	94.23±2.44	2.59024	105.46±2.18	2.07082
109	Isopyrazam	Coumaphos-d10-3	0.99595	0.25	50		102.55±7.08	6.90137	93.31±3.15	3.38018	100.41±2.46	2.45259
110	Acetamiprid	Propazine-d14	0.99388	0.25	25		109.84±6.05	5.51202	84.35±7.68	9.10118	65.73±7.5	11.4172
111	Azithromycin	Prometryne-d4	0.99369	0.25	10		100.39±9.68	9.6461	90.58±5.26	5.8105	109.06±2.04	1.87105
112	Cadusafos	Metalaxyl-d6	0.9984	0.25	50		93.76±3.42	3.64488	79.03±4.2	5.31941	99.08±5.58	5.62868
113	Desloratadine	Prometryne-d4	0.99715	0.25	25		105.01±7.06	6.72768	106.39±4.11	3.86156	93.55±1.98	2.11501
114	Medroxyprogesterone acetate	Coumaphos-d10-3	0.99964	0.25	50		102.64±7.99	7.78329	87.25±2.19	2.51498	99.6±1.51	1.51622
115	Nifedipine	Propazine-d14	0.99903	0.25	100		109.99±4.58	4.16069	111.06±4.01	3.6127	105.21±6.33	6.01942
116	Tebufenozide	Clenbuterol-d9	0.9998	0.25	25		106.43±5.1	4.79038	113.23±1.62	1.42748	107.08±14.47	13.5137
117	Terbucarb	Myclobutanil-d9-2	0.99673	0.25	50		102.74±6.33	6.16611	88.55±8.5	9.59784	89.75±17.6	19.6131
118	Testosterone	Prometryne-d4	0.99939	0.25	100		104.78±7.23	6.90001	97.71±2.86	2.92339	98.86±1.94	1.95866
119	Mebendazole-amine	Prometryne-d4	0.99367	0.25	50		103.02±6.37	6.17853	117.49±5.75	4.89817	103.02±2.78	2.69693
120	Simeconazole	Metalaxyl-d6	0.99717	0.25	50		97.5±3.77	3.86678	88.3±2.91	3.29387	101.38±1.21	1.19543
121	Sulfoaildenafil	Prometryne-d4	0.99995	0.25	100		106.09±5.69	5.36279	111.33±5.52	4.95814	105.06±5.61	5.34258
122	2-Hydroxy-4-methoxybenzophenone-5-sulfonic acid	2,4-D-D3	0.99484	0.5	100		91.06±39.58	4.34701	107.23±8.54	7.96564	108.73±7.43	6.83584
123	3-Chloro-7-hydroxy-4-methylcoumarin	Perfluorooctanoic acid-1,2,3,4-13C4	0.9971	0.5	100		108.66±5.29	4.86828	99.55±3.21	3.22599	98.24±3.53	3.59592
124	Bisphenol AF	Perfluorooctanoic acid-1,2,3,4-13C4	0.99847	0.5	100		119.44±2.61	2.18781	92.95±1.14	1.22752	97.53±1.43	1.4669
125	Dinoterb	Triclosan-13C12	0.99855	0.5	100		102.02±7.38	7.23334	91.36±3.18	3.48216	101.53±2.37	2.33149
126	Genistein	Sodium Perfluorohexanesulfonate-18O2	0.99858	0.5	50		98.57±8.19	8.30963	105.56±8.67	8.21076	93.39±4.44	4.75146
127	Mecoprop	Sodium Perfluorooctanesulfonate-1,2,3,4-13C4	0.99842	0.5	10		107.41±9.64	8.97216	100.8±2.43	2.41376	118.39±3.21	2.70954
128	Dazomet	Propazine-d14	0.9995	0.5	10		90.96±3.51	3.86416	87.61±4.05	4.62523	110.79±3.32	2.99633
129	Mevinphos	Metalaxyl-d6	0.99591	0.5	25		105.4±4.03	3.82465	83.75±5.13	6.11995	81.18±12.46	15.3475
130	Nicotine	Prometryne-d4	0.99932	0.5	50		93.21±7.91	8.48349	76.92±2.69	3.49856	84.64±4.3	5.07796
131	2-Hydroxy-methoxybenzophenone-sulfonic acid	Prometryne-d4	0.99616	0.5	25		109.4±4.22	3.85758	91.27±5.43	5.94976	112.99±5.55	4.91583
132	Metformin	Prometryne-d4	0.99767	0.5	50		107.62±10.4	9.65997	92.84±2.25	2.42215	107.84±6.27	5.81429
133	Norfloxacin	Prometryne-d4	0.99884	0.5	100		124.84±25.25	20.228	115.38±3.41	2.95882	103.14±9.12	8.84402
134	Ketorolac	Myclobutanil-d9-2	0.99605	0.5	50		102.23±6.82	6.67267	88.13±2.92	3.31812	95.44±2.96	3.09816
135	Amlodipine besylate	Clenbuterol-d9	0.99921	0.5	50		120.07±7.49	6.23671	104.25±6.84	6.55942	104.86±2.97	2.82796
136	Methicillin	Metalaxyl-d6	0.99875	0.5	10		109.07±5.72	5.24237	90.57±1.82	2.01387	83.26±6.06	7.27401
137	Monoethyl phthalate	Metalaxyl-d6	0.99946	0.5	50		103.6±11.25	10.8636	84.72±3.4	4.00997	83.69±2.29	2.73777
138	3,5-Di-tert-butyl-4-hydroxybenzyl alcohol	Triclosan-13C12	0.99484	1	100		-	-	89.72±6.92	7.70833	96.15±3.07	3.19631
139	3-Methyl-4-nitrophenol	Fipronil-13C2-15N2	0.99693	1	100		-	-	100.9±4.83	4.78928	94.62±2.63	2.77728
140	Chlorothalonil	Perfluorononanoic acid-13C5	0.99364	1	50		-	-	90.49±6.24	6.89137	96.58±1.12	1.15621
141	Moxifloxacin	Prometryne-d4	0.99625	1	50		-	-	88.57±1.66	1.8706	98.54±4.48	4.54352
142	Nitrendipine	Clenbuterol-d9	0.99658	1	100		-	-	104.74±9.55	9.11654	94.35±7.01	7.43246
143	Perfluorooctanesulfonate (PFOS)	Sodium Perfluorooctanesulfonate-1,2,3,4-13C4	0.99718	2.5	100		-	-	106.92±8.32	7.78389	101.03±2.29	2.2637
144	Cycluron	Coumaphos-d10-3	0.99939	2.5	100		-	-	93.93±5.45	5.80751	92.23±2.91	3.15863
145	Prednisolone	Coumaphos-d10-3	0.99191	2.5	50		-	-	107.91±8.73	8.0881	99.96±6.78	6.7836

## Sheet: Supplementary Data 8
Supplementary Data 8. Total of 756 annotated compounds in 2DLC-HRMS-based metabolomics.
ID	Name	Metabolites classes	Formula	Isotope labeled internal standard	HMDB ID	INCHIKEY	Retention time	ESI mode (ESI+/ESI-)	Adduct iion type	m/z	RSD in QCs (%)	Qualitative grade
1	1-Palmitoyl-2-azelaoylphosphatidylcholine	Amine	C33H64NO10P	LPE 13:0	-	GHQQYDSARXURNG-SSEXGKCCSA-N	19.822	ESI+	[M+H]+	666.435	5.06884	Level 2
2	3-Aminopiperidin-2-one	Amine	C5H10N2O	CA-d4	HMDB0000323	YCCMTCQQDULIFE-UHFFFAOYSA-N	8.602	ESI+	[M+H]+	115.087	2.40686	Level 1
3	Allantoin	Amine	C4H6N4O3	Phe-Trp-13C9,15N	HMDB0000462	POJWUDADGALRAB-UHFFFAOYSA-N	4.203	ESI-	M-H	157.036	2.98013	Level 1
4	Cyclohexylamine	Amine	C6H13N	Taurine-d4	HMDB0031404	PAFZNILMFXTMIY-UHFFFAOYSA-N	3.671	ESI+	[M+H]+	100.113	19.4393	Level 1
5	N-Acetyl-D-mannosamine hydrate	Amine	C8H15NO6	PE(15:0/15:0)	-	KVWIBLJBIFTKIZ-XNJRRJNCSA-N	4.833	ESI+	[M+H]+	222.098	11.9229	Level 1
6	Phosphocholine	Amine	C5H14NO4P	PE(15:0/15:0)	HMDB0001565	JGULOZKZZMBGFX-UHFFFAOYSA-L	8.456	ESI+	[M+H]+	184.074	5.88628	Level 1
7	Serotonin	Amine	C10H12N2O	Glutamic acid-d3	HMDB0000259	QZAYGJVTTNCVMB-UHFFFAOYSA-N	4.091	ESI+	[M+H]+	177.103	11.2862	Level 1
8	1-Methyl-L-histidine	Amino Acid	C7H11N3O2	NT-methylhistidine-d3	HMDB0000001	BRMWTNUJHUMWMS-LURJTMIESA-N	7.86	ESI+	[M+H]+	170.093	1.69328	Level 1
9	2-Acetamidooctanoic acid	Amino Acid	C10H19NO3	Phe-Trp-13C9,15N	HMDB0059745	JJGNMSOJTSABGA-UHFFFAOYSA-N	12.591	ESI-	[M-H]-	200.129	3.63723	Level 2
10	2-Amino-6-phosphonohexanoic acid	Amino Acid	C6H14NO5P	Guanosine-13C,15N2	-	QIOXWRQXHFVNLV-UHFFFAOYSA-N	12.965	ESI+	[M+H]+	212.069	3.82823	Level 2
11	3-Aminoglutarimide	Amino Acid	C5H8N2O2	CA-d4	HMDB0242134	NPWMTBZSRRLQNJ-UHFFFAOYSA-N	7.339	ESI+	[M+H]+	129.066	1.80578	Level 2
12	3-Methylhistidine	Amino Acid	C7H11N3O2	Lysine-d4	HMDB0000479	JDHILDINMRGULE-LURJTMIESA-N	8.405	ESI+	[M+H]+	170.093	7.31197	Level 1
13	4-Hydroxy-L-isoleucine	Amino Acid	C6H13NO3	Ornithine-13C5	-	OSCCDBFHNMXNME-DSDZBIDZSA-N	6.436	ESI-	[M-H]-	146.082	12.4421	Level 2
14	5-Hydroxy-DL-lysine	Amino Acid	C6H14N2O3	Lysine-d4	HMDB0245508	MJXVOTKVFFAZQJ-UHFFFAOYSA-N	8.741	ESI+	[M+H]+	163.108	3.14567	Level 1
15	Acetyl-L-threonine	Amino Acid	C6H11NO4	Phe-Trp-13C9,15N	HMDB0062557	PEDXUVCGOLSNLQ-WUJLRWPWSA-N	4.574	ESI-	[M-H]-	160.061	5.46514	Level 2
16	Alanine	Amino Acid	C3H7NO2	Leucine-d3	HMDB0000161	QNAYBMKLOCPYGJ-REOHCLBHSA-N	7.14	ESI+	[M+H]+	90.0555	1.92754	Level 1
17	Allothreonine	Amino Acid	C4H9NO3	4-Hydroxyproline-d3	HMDB0004041	AYFVYJQAPQTCCC-HRFVKAFMSA-N	7.384	ESI-	M-H	118.05	6.32466	Level 1
18	Asparagine	Amino Acid	C4H8N2O3	Phe-Trp-13C9,15N	HMDB0000168	RBMGJIZCEWRQES-DKWTVANSSA-N	7.909	ESI-	M-H	131.046	3.95534	Level 1
19	Aspartic acid	Amino Acid	C4H7NO4	CA-d4	HMDB0000191	CKLJMWTZIZZHCS-UHFFFAOYSA-N	8.308	ESI+	[M+H]+	134.045	3.59432	Level 1
20	beta-Hydroxyleucine	Amino Acid	C6H13NO3	Lysine-d4	-	ZAYJDMWJYCTABM-ROLXFIACSA-N	4.855	ESI+	[M+H]+	148.097	2.52891	Level 2
21	Carnosine	Amino Acid	C9H14N4O3	Phenylalanine-d5	HMDB0000033	CQOVPNPJLQNMDC-ZETCQYMHSA-N	8.342	ESI+	[M+H]+	227.114	11.1299	Level 1
22	Cinnamoylglycine	Amino Acid	C11H11NO3	Phe-Trp-13C9,15N	HMDB0011621	YAADMLWHGMUGQL-VOTSOKGWSA-N	12.048	ESI-	[M-H]-	204.066	22.5352	Level 2
23	Citrulline	Amino Acid	C6H13N3O3	CA-d4	HMDB0000904	RHGKLRLOHDJJDR-BYPYZUCNSA-N	7.967	ESI+	[M+H]+	176.104	2.55059	Level 1
24	Creatine	Amino Acid	C4H9N3O2	Guanosine-13C,15N2	HMDB0000064	CVSVTCORWBXHQV-UHFFFAOYSA-N	7.144	ESI+	[M+H]+	132.077	10.7923	Level 1
25	Cycloleucine	Amino Acid	C6H11NO2	NT-methylhistidine-d3	HMDB0062225	NILQLFBWTXNUOE-UHFFFAOYSA-N	6.392	ESI+	[M+H]+	130.087	3.58641	Level 1
26	Cysteine	Amino Acid	C3H7NO2S	Glutamic acid-d3	HMDB0000574	XUJNEKJLAYXESH-REOHCLBHSA-N	8.75	ESI+	[M+H]+	122.028	13.2849	Level 2
27	Cystine	Amino Acid	C6H12N2O4S2	Glutamic acid-d3	HMDB0000192	LEVWYRKDKASIDU-IMJSIDKUSA-N	8.843	ESI+	[M+H]+	241.032	2.21015	Level 1
28	E-N-Deoxyfructosyllysine	Amino Acid	C12H24N2O7	CDCA-d4	HMDB0034879	BFSYFTQDGRDJNV-AYHFEMFVSA-N	8.828	ESI+	[M+H]+	309.166	5.50068	Level 2
29	Ergothioneine	Amino Acid	C9H15N3O2S	LPC 19:0	HMDB0003045	SSISHJJTAXXQAX-ZETCQYMHSA-N	6.897	ESI+	[M+H]+	230.096	2.98306	Level 2
30	Ethionine	Amino Acid	C6H13NO2S	Phenylalanine-d5	HMDB0251518	GGLZPLKKBSSKCX-UHFFFAOYSA-N	4.673	ESI+	[M+H]+	164.075	7.66127	Level 2
31	Glu-ol	Amino Acid	C5H11NO3	4-Hydroxyproline-d3	-	JPYGFLFUDLRNKX-BYPYZUCNSA-N	7.126	ESI-	[M-H]-	132.066	6.55039	Level 2
32	Glutamic acid	Amino Acid	C5H9NO4	Glutamic acid-d3	HMDB0000148	WHUUTDBJXJRKMK-VKHMYHEASA-N	8.061	ESI-	M-H	146.045	2.21649	Level 1
33	Glutamine	Amino Acid	C5H10N2O3	Taurine-d4	HMDB0000641	ZDXPYRJPNDTMRX-UHFFFAOYSA-N	7.789	ESI-	M-H	145.061	2.97817	Level 1
34	Glutamylalanine	Amino Acid	C8H14N2O5	4-Aminobutyric acid-d6	HMDB0003764	JZDHUJAFXGNDSB-WHFBIAKZSA-N	8.226	ESI+	[M+H]+	219.098	2.62661	Level 1
35	Guanidineacetic acid	Amino Acid	C3H7N3O2	Lysine-d4	HMDB0000128	BPMFZUMJYQTVII-UHFFFAOYSA-N	7.324	ESI+	[M+H]+	118.062	2.55706	Level 1
36	Histidine	Amino Acid	C6H9N3O2	Leucine-d3	HMDB0000177	HNDVDQJCIGZPNO-YFKPBYRVSA-N	8.346	ESI+	[M+H]+	156.077	1.38303	Level 1
37	Homoarginine	Amino Acid	C7H16N4O2	Glutamic acid-d3	HMDB0000670	QUOGESRFPZDMMT-YFKPBYRVSA-N	8.407	ESI+	[M+H]+	189.135	2.71233	Level 1
38	Homocitrulline	Amino Acid	C7H15N3O3	Glutamic acid-d3	HMDB0000679	XIGSAGMEBXLVJJ-UHFFFAOYSA-N	7.857	ESI-	[M-H]-	188.104	4.18805	Level 2
39	Leucine	Amino Acid	C6H13NO2	CA-d4	HMDB0000687	ROHFNLRQFUQHCH-YFKPBYRVSA-N	4.724	ESI+	[M+H]+	132.102	1.06462	Level 1
40	Linoleoylglycine	Amino Acid	C20H35NO3	SM d18:1/12:0	-	YCRHZEHWEYAHCO-HZJYTTRNSA-N	17.7	ESI+	[M+H-H2O]+	320.259	4.2905	Level 2
41	Lysine	Amino Acid	C6H14N2O2	CA-d4	HMDB0000182	KDXKERNSBIXSRK-YFKPBYRVSA-N	8.565	ESI+	[M+H]+	147.113	1.79638	Level 1
42	Methionine sulfoxide	Amino Acid	C5H11NO3S	Leucine-d3	HMDB0250776	QEFRNWWLZKMPFJ-UHFFFAOYSA-N	7.656	ESI+	[M+H]+	166.054	3.38272	Level 1
43	Methyl O-(tert-butyl)-L-serinate	Amino Acid	C8H17NO3	NT-methylhistidine-d3	-	MMJPLCPGTJXFNH-LURJTMIESA-N	6.891	ESI+	[M+H]+	176.129	4.02396	Level 2
44	N(6)-acetimidoyl-L-lysine	Amino Acid	C8H17N3O2	4-Aminobutyric acid-d6	HMDB0249982	ONYFNWIHJBLQKE-UHFFFAOYSA-N	8.256	ESI+	[M+H]+	188.14	7.14346	Level 2
45	N,N,N-trimethyllysine	Amino Acid	C9H20N2O2	CA-d4	-	ZKIJKCHCMFGMCM-QRPNPIFTSA-N	8.319	ESI+	[M+H]+	189.16	1.82287	Level 1
46	N,N-Dimethyl-arginine	Amino Acid	C8H18N4O2	Leucine-d3	HMDB0001539	UUOXQIUITFURPF-UHFFFAOYSA-N	8.045	ESI+	[M+H]+	203.151	1.47558	Level 1
47	N,N-Dimethyl-lysine	Amino Acid	C8H18N2O2	CA-d4	HMDB0013287	XXEWFEBMSGLYBY-ZETCQYMHSA-N	8.263	ESI+	[M+H]+	175.145	1.70878	Level 1
48	N.alpha.-Acetyl-L-lysine	Amino Acid	C8H16N2O3	4-Hydroxyproline-d3	HMDB0000446	VEYYWZRYIYDQJM-ZETCQYMHSA-N	7.235	ESI-	[M-H]-	187.108	6.67658	Level 2
49	N-3-Oxohexadec-11Z-enoyl-L-homoserine lactone	Amino Acid	C20H33NO4	CDCA-d4	-	NNIVINPZTHXZNK-ZEVQVBBLSA-N	13.831	ESI+	[M+H]+	352.249	7.53168	Level 2
50	N-Acetyl-arginine	Amino Acid	C8H16N4O3	NT-methylhistidine-d3	HMDB0004620	SNEIUMQYRCDYCH-LURJTMIESA-N	7.284	ESI+	[M+H]+	217.13	4.55478	Level 1
51	N-Acetyl-aspartic acid	Amino Acid	C6H9NO5	Lysine-d4	HMDB0000812	OTCCIMWXFLJLIA-BYPYZUCNSA-N	4.87	ESI-	M-H	174.04	25.8966	Level 1
52	N-Acetylglycine	Amino Acid	C4H7NO3	5-Hydroxy-L-tryptophan-d4	HMDB0000532	OKJIRPAQVSHGFK-UHFFFAOYSA-N	4.444	ESI-	M-H	116.035	8.30018	Level 1
53	N-Acetyl-L-carnosine	Amino Acid	C11H16N4O4	CA-d4	HMDB0012881	BKAYIFDRRZZKNF-VIFPVBQESA-N	7.617	ESI+	[M+H]+	269.125	5.45495	Level 2
54	N-Acetyl-leucine	Amino Acid	C8H15NO3	Ornithine-13C5	HMDB0011756	WXNXCEHXYPACJF-ZETCQYMHSA-N	4.575	ESI+	[M+H]+	174.113	6.73249	Level 2
55	N-Acetyl-L-glutamic acid	Amino Acid	C7H11NO5	4-Hydroxyproline-d3	HMDB0001138	RFMMMVDNIPUKGG-YFKPBYRVSA-N	4.701	ESI-	M-H	188.056	8.2484	Level 1
56	N-Acetyl-L-glutamine	Amino Acid	C7H12N2O4	Tyrosine-d4	HMDB0006029	KSMRODHGGIIXDV-YFKPBYRVSA-N	4.888	ESI-	M-H	187.072	5.8466	Level 1
57	N-Acetyl-L-histidine	Amino Acid	C8H11N3O3	4-Hydroxyproline-d3	HMDB0032055	KBOJOGQFRVVWBH-ZETCQYMHSA-N	7.228	ESI-	M-H	196.072	8.61758	Level 1
58	N-Acetyl-L-methionine	Amino Acid	C7H13NO3S	Homocystine-d8	HMDB0011745	XUYPXLNMDZIRQH-UHFFFAOYSA-N	3.553	ESI-	M-H	190.054	6.60487	Level 1
59	N-Acetyl-L-phenylalanine	Amino Acid	C11H13NO3	4-Hydroxyproline-d3	HMDB0000512	CBQJSKKFNMDLON-JTQLQIEISA-N	12.423	ESI+	[M+H]+	208.097	6.08023	Level 1
60	N-Acetyl-tryptophan	Amino Acid	C13H14N2O3	4-Aminobutyric acid-d6	HMDB0255052	DZTHIGRZJZPRDV-UHFFFAOYSA-N	12.379	ESI+	[M+H]+	247.108	5.46937	Level 1
61	N-Acetyl-valine	Amino Acid	C7H13NO3	Lysine-d4	HMDB0011757	IHYJTAOFMMMOPX-UHFFFAOYSA-N	8.665	ESI+	[M+H]+	160.097	8.56692	Level 2
62	NAGly 14:0	Amino Acid	C16H31NO3	FFA 16:0-d3	HMDB0013250	DYUGTPXLDJQBRB-UHFFFAOYSA-N	17.845	ESI-	[M-H]-	284.223	3.85061	Level 2
63	NAGly 22:2	Amino Acid	C24H43NO3	5-Hydroxy-L-tryptophan-d4	-	YCNDVBBSWKGJDF-UHFFFAOYSA-N	19.51	ESI-	[M-H]-	392.316	27.5655	Level 2
64	NAGly 24:3;O	Amino Acid	C26H43NO5	Phenylalanine-d5	-	CIQVHMWGMVNFPS-UHFFFAOYSA-N	16.272	ESI-	[M-H]-	448.306	6.89609	Level 2
65	NAGly 24:5	Amino Acid	C26H41NO3	CDCA-d4	-	MQKNSVIKVUVJHT-UHFFFAOYSA-N	16.014	ESI+	[M+H]+	416.316	3.56015	Level 2
66	N-alpha-Acetyl-L-lysine	Amino Acid	C7H14N2O3	Glutamic acid-d3	HMDB0003357	JRLGPAXAGHMNOL-LURJTMIESA-N	7.495	ESI-	M-H	173.093	7.56378	Level 1
67	N-Benzoyl(carboxymethyl)cysteine	Amino Acid	C12H13NO5S	Phe-Trp-13C9,15N	-	ZNPRRHVZHMGIKB-UHFFFAOYSA-N	4.747	ESI-	[M-H]-	282.044	4.49363	Level 2
68	N-cis-Octadec-9-enoyl-L-homoserine lactone	Amino Acid	C22H39NO3	5-Hydroxy-L-tryptophan-d4	-	PYEKBLYUYSJMKS-QJRAZLAKSA-N	18.242	ESI+	[M+H]+	366.301	4.74478	Level 2
69	N-cis-Tetradec-9Z-enoyl-L-homoserine lactone	Amino Acid	C18H31NO3	Lysine-d4	-	CNVCBUGVTPVVJB-KJPDOMRESA-N	15.963	ESI+	[M+H]+	310.238	2.31623	Level 2
70	N-epsilon-Acetyllysine	Amino Acid	C8H16N2O3	Leucine-d3	HMDB0000206	DTERQYGMUDWYAZ-ZETCQYMHSA-N	7.21	ESI+	[M+H]+	189.124	2.39098	Level 1
71	N-epsilon-Formyl-L-lysine	Amino Acid	C7H14N2O3	4-Hydroxyproline-d3	-	KLPJXDPPMSJWKI-LURJTMIESA-N	7.42	ESI+	[M+H]+	175.108	9.62643	Level 2
72	N-Formyl-L-methionine	Amino Acid	C6H11NO3S	FFA 16:0-d3	HMDB0001015	PYUSHNKNPOHWEZ-YFKPBYRVSA-N	3.672	ESI-	M-H	176.038	8.53579	Level 1
73	N-Fructosyl isoleucine	Amino Acid	C12H23NO7	Phe-Trp-13C9,15N	-	VYGRYVGDPYFVCA-UHFFFAOYSA-N	6.75	ESI-	[M-H]-	292.14	15.0374	Level 2
74	N-methyllysine	Amino Acid	C7H16N2O2	Leucine-d3	-	PQNASZJZHFPQLE-UHFFFAOYSA-N	8.378	ESI+	[M+H]+	161.129	1.98793	Level 2
75	N-Methylthreonine	Amino Acid	C5H11NO3	CA-d4	-	CCAIIPMIAFGKSI-DMTCNVIQSA-N	7.48	ESI+	[M+H]+	134.082	1.86868	Level 2
76	Norvaline	Amino Acid	C5H11NO2	Lysine-d4	HMDB0013716	SNDPXSYFESPGGJ-BYPYZUCNSA-N	6.193	ESI-	[M-H]-	116.071	22.4625	Level 2
77	N-succinyl-glycine	Amino Acid	C6H7NO4	Lysine-d4	-	ZQBWYXZRSMMISZ-UHFFFAOYSA-N	4.861	ESI-	[M-H]-	156.03	17.487	Level 2
78	Ornithine	Amino Acid	C5H12N2O2	Ornithine-13C5	HMDB0000214	GGTYBZJRPHEQDG-WCCKRBBISA-N	8.607	ESI+	[M+H]+	133.098	1.67838	Level 1
79	Phenylacetylglutamine	Amino Acid	C13H16N2O4	Ornithine-13C5	HMDB0006344	JFLIEFSWGNOPJJ-JTQLQIEISA-N	3.989	ESI+	[M+H]+	265.119	1.14241	Level 1
80	Phenylalanine	Amino Acid	C9H11NO2	Phenylalanine-d5	HMDB0000159	COLNVLDHVKWLRT-QMMMGPOBSA-N	4.707	ESI+	[M+H]+	166.087	3.51772	Level 1
81	Proline	Amino Acid	C5H9NO2	NT-methylhistidine-d3	HMDB0000162	ONIBWKKTOPOVIA-BYPYZUCNSA-N	6.278	ESI+	[M+H]+	116.071	2.16718	Level 1
82	Putrescine	Amino Acid	C4H12N2	Tryptophan-d5	HMDB0001414	KIDHWZJUCRJVML-UHFFFAOYSA-N	8.232	ESI+	[M+H]+	89.1079	12.9303	Level 1
83	Pyroglutamic acid	Amino Acid	C5H7NO3	Phe-Trp-13C9,15N	HMDB0000267	ODHCTXKNWHHXJC-GSVOUGTGSA-N	4.741	ESI-	[M-H]-	128.035	7.83579	Level 2
84	Serine	Amino Acid	C3H7NO3	Phe-Trp-13C9,15N	HMDB0000187	MTCFGRXMJLQNBG-REOHCLBHSA-N	7.848	ESI-	M-H	104.035	3.46584	Level 1
85	S-Sulfocysteine	Amino Acid	C3H7NO5S2	Tyrosine-d4	HMDB0000731	NOKPBJYHPHHWAN-REOHCLBHSA-N	7.143	ESI-	[M-H]-	199.969	4.32455	Level 2
86	Symmetric dimethylarginine	Amino Acid	C8H18N4O2	Taurine-d4	HMDB0003334	HVPFXCBJHIIJGS-LURJTMIESA-N	8.155	ESI-	[M-H]-	201.135	4.6576	Level 2
87	trans-4-Hydroxy-L-proline	Amino Acid	C5H9NO3	5-Hydroxy-L-tryptophan-d4	HMDB0000725	PMMYEEVYMWASQN-DMTCNVIQSA-N	7.188	ESI-	[M-H]-	130.05	10.8308	Level 2
88	Tryptophan	Amino Acid	C11H12N2O2	Phenylalanine-d5	HMDB0000929	QIVBCDIJIAJPQS-VIFPVBQESA-N	4.715	ESI+	[M+H]+	205.098	3.99789	Level 1
89	Tryptophan betaine	Amino Acid	C14H18N2O2	Lysine-d4	HMDB0061115	AOHCBEAZXHZMOR-ZDUSSCGKSA-N	3.889	ESI+	[M+H]+	247.145	8.1857	Level 1
90	Tyrosine	Amino Acid	C9H11NO3	NT-methylhistidine-d3	HMDB0000158	OUYCCCASQSFEME-QMMMGPOBSA-N	6.411	ESI+	[M+H]+	182.082	3.8282	Level 1
91	Valine	Amino Acid	C5H11NO2	Glutamic acid-d3	HMDB0000883	KZSNJWFQEVHDMF-BYPYZUCNSA-N	4.884	ESI+	[M+H]+	118.087	3.02487	Level 1
92	3-Dehydrocholic acid	Bile acid	C24H38O5	Homocystine-d8	HMDB0000502	OEKUSRBIIZNLHZ-YXRVOZSUSA-N	20.514	ESI-	[M-H]-	405.264	2.9528	Level 2
93	4-cholesten-7alpha,24S-diol-3-one	Bile acid	C27H44O3	5-Hydroxy-L-tryptophan-d4	-	LFFHZNXDGBQZCO-GXKBHXPCSA-N	18.311	ESI+	[M+H]+	417.337	2.99068	Level 2
94	7.alpha.-Hydroxy-3-oxo-4-cholestenoic acid	Bile acid	C27H42O4	CDCA-d4	-	SATGKQGFUDXGAX-SLTBQWEQSA-N	16.599	ESI-	[M-H]-	429.3	3.02486	Level 2
95	7-Ketolithocholic acid	Bile acid	C24H38O4	Phenylalanine-d5	HMDB0000467	DXOCDBGWDZAYRQ-AURDAFMXSA-N	18.909	ESI-	[M-H]-	389.269	25.7673	Level 2
96	Chenodeoxycholic acid	Bile acid	C24H40O4	CDCA-d4	HMDB0000518	RUDATBOHQWOJDD-BSWAIDMHSA-N	14.849	ESI-	[M-H]-	391.285	2.69368	Level 2
97	Cholic acid	Bile acid	C24H40O5	CA-d4	HMDB0000619	BHQCQFFYRZLCQQ-OELDTZBJSA-N	15.357	ESI-	M-H	407.28	2.41338	Level 1
98	Glycochenodeoxycholic acid	Bile acid	C26H43NO5	4-Aminobutyric acid-d6	HMDB0000637	GHCZAUBVMUEKKP-GYPHWSFCSA-N	16.856	ESI+	[M+H]+	450.322	10.7698	Level 1
99	Glycocholic acid	Bile acid	C26H43NO6	Tryptophan-d5	HMDB0000138	RFDAIACWWDREDC-FRVQLJSFSA-N	4.006	ESI+	[M+H]+	466.317	5.82547	Level 1
100	Glycohyodeoxycholic acid	Bile acid	C26H43NO5	Guanosine-13C,15N2	HMDB0304944	SPOIYSFQOFYOFZ-BRDORRHWSA-N	14.493	ESI-	[M-H]-	448.306	4.91223	Level 2
101	Glycoursodeoxycholic acid	Bile acid	C26H43NO5	PE(15:0/15:0)	HMDB0000708	GHCZAUBVMUEKKP-XROMFQGDSA-N	15.102	ESI+	[M+H]+	450.322	4.82467	Level 1
102	ST 24:2;O3;S	Bile acid	C24H38O7S	5-Hydroxy-L-tryptophan-d4	-	WYQAWCKJZZTWLZ-UHFFFAOYSA-N	12.552	ESI-	[M-H]-	469.226	12.4781	Level 2
103	Sulfoglycolithocholic acid	Bile acid	C26H43NO7S	CDCA-d4	HMDB0062801	FHXBAFXQVZOILS-UHFFFAOYSA-N	14.756	ESI-	[M-H]-	512.268	2.59103	Level 2
104	Taurochenodeoxycholic acid	Bile acid	C26H45NO6S	Tryptophan-d5	HMDB0000951	BHTRKEVKTKCXOH-BJLOMENOSA-N	16.211	ESI-	[M-H]-	498.289	6.62385	Level 2
105	Taurocholic acid	Bile acid	C26H45NO7S	Lysine-d4	HMDB0000036	WBWWGRHZICKQGZ-HZAMXZRMSA-N	4.336	ESI-	[M-H]-	514.284	9.48796	Level 2
106	Ursodeoxycholic acid	Bile acid	C24H40O4	CDCA-d4	HMDB0000946	RUDATBOHQWOJDD-UZVSRGJWSA-N	13.83	ESI-	[M-H]-	391.285	2.01465	Level 2
107	(S)-2-hydroxy-3-(1H-imidazol-4-yl)propanoic acid	Carboxylic acid	C6H8N2O3	Lysine-d4	-	ACZFBYCNAVEFLC-YFKPBYRVSA-N	7.551	ESI-	M-H	155.046	28.3454	Level 1
108	12-Hydroxyjasmonic acid	Carboxylic acid	C12H18O4	Hippuric acid-d5	-	RZGFUGXQKMEMOO-BSANDHCLSA-N	12.828	ESI+	[M+H]+	227.128	28.6144	Level 2
109	2,2-Dimethylsuccinic acid	Carboxylic acid	C6H10O4	FFA 16:0-d3	HMDB0002074	GOHPTLYPQCTZSE-UHFFFAOYSA-N	3.613	ESI-	[M-H]-	145.05	8.98694	Level 2
110	2,3-Dihydroxy-2-methylbutanoic acid	Carboxylic acid	C5H10O4	Tryptophan-d5	HMDB0029576	AOWPAWLEXIYETE-UHFFFAOYSA-N	4.067	ESI-	[M-H]-	133.05	25.8169	Level 2
111	20-Hydroxyarachidonic acid	Carboxylic acid	C20H32O3	Homocystine-d8	HMDB0005998	NNDIXBJHNLFJJP-DTLRTWKJSA-N	18.335	ESI+	[M+H]+	321.243	18.8834	Level 2
112	2-Aminoadipic acid	Carboxylic acid	C6H11NO4	Phe-Trp-13C9,15N	HMDB0302754	OYIFNHCXNCRBQI-UHFFFAOYSA-N	7.768	ESI-	M-H	160.061	4.68057	Level 1
113	2-Hydroxy-6-methylnicotinic acid	Carboxylic acid	C7H7NO3	Carnitine C6:0-d3	-	XRIHTJYXIHOBDQ-UHFFFAOYSA-N	3.815	ESI+	[M+H]+	154.05	11.2308	Level 1
114	2-Hydroxyglutaric acid	Carboxylic acid	C5H8O5	Phe-Trp-13C9,15N	HMDB0000694	HWXBTNAVRSUOJR-VKHMYHEASA-N	4.677	ESI-	[M-H]-	147.029	8.18517	Level 2
115	2-keto-3-deoxy-nononic acid	Carboxylic acid	C9H16O9	Ornithine-13C5	-	CLRLHXKNIYJWAW-YOQZMRDMSA-N	8.496	ESI-	[M-H]-	267.072	17.1339	Level 2
116	2-Methylcitric acid	Carboxylic acid	C7H10O7	FFA 18:0-d3	HMDB0000379	YNOXCRMFGMSKIJ-UHFFFAOYSA-N	7.797	ESI-	[M-H]-	205.035	15.7632	Level 2
117	2-Methyllactic acid	Carboxylic acid	C4H8O3	Glutamic acid-d3	HMDB0000729	BWLBGMIXKSTLSX-UHFFFAOYSA-N	3.444	ESI-	M-H	103.04	6.15737	Level 1
118	2-Phenylpropionic acid	Carboxylic acid	C9H10O2	Glutamic acid-d3	HMDB0011743	YPGCWEMNNLXISK-UHFFFAOYSA-N	11.952	ESI-	[M-H]-	149.06	5.57614	Level 2
119	3-(1H-imidazol-4-yl)propanoic acid	Carboxylic acid	C6H8N2O2	Leucine-d3	HMDB0002271	ZCKYOWGFRHAZIQ-UHFFFAOYSA-N	4.703	ESI+	[M+H]+	141.066	4.29003	Level 1
120	3-(3,4-dimethoxyphenyl) propionic acid	Carboxylic acid	C11H14O4	CA-d4	-	LHHKQWQTBCTDQM-UHFFFAOYSA-N	12.791	ESI+	[M+H]+	211.097	11.1526	Level 1
121	3-Amino-5-hydroxybenzoic acid	Carboxylic acid	C7H7NO3	Glutamic acid-d3	HMDB0304942	QPEJHSFTZVMSJH-UHFFFAOYSA-N	3.881	ESI-	[M-H]-	152.035	9.62672	Level 2
122	3-Aminobutanoic acid	Carboxylic acid	C4H9NO2	Phenylalanine-d5	HMDB0031654	OQEBBZSWEGYTPG-UHFFFAOYSA-N	4.863	ESI-	[M-H]-	102.056	19.4997	Level 2
123	3-Furoic acid	Carboxylic acid	C5H4O3	Guanosine-13C,15N2	HMDB0000444	IHCCAYCGZOLTEU-UHFFFAOYSA-N	9.473	ESI-	[M-H]-	111.008	11.7119	Level 2
124	3-Hydroxy-2-octylpentanedioic acid	Carboxylic acid	C13H24O5	Taurine-d4	-	ROYIOVVKJBERGN-UHFFFAOYSA-N	11.811	ESI-	[M-H]-	259.155	7.7026	Level 2
125	3-Oxopentanoic acid	Carboxylic acid	C5H8O3	LPE 13:0	HMDB0245963	FHSUFDYFOHSYHI-UHFFFAOYSA-N	3.58	ESI-	[M-H]-	115.04	14.8372	Level 2
126	4-COUMARATE	Carboxylic acid	C9H8O3	NT-methylhistidine-d3	HMDB0002035	NGSWKAQJJWESNS-ZZXKWVIFSA-N	6.411	ESI+	[M+NH4]+	182.082	3.14686	Level 1
127	4-Hydroxybenzoic acid	Carboxylic acid	C7H6O3	Guanosine-13C,15N2	HMDB0000500	FJKROLUGYXJWQN-UHFFFAOYSA-N	13.921	ESI+	[M+H]+	139.04	5.3572	Level 2
128	4-Oxononanoic acid	Carboxylic acid	C9H16O3	Phenylalanine-d5	-	PRDIIROHTWNJDB-UHFFFAOYSA-N	13.001	ESI+	[M+H]+	173.118	9.49695	Level 1
129	4-Pyridoxic acid	Carboxylic acid	C8H9NO4	Glutamic acid-d3	HMDB0000017	HXACOUQIXZGNBF-UHFFFAOYSA-N	3.53	ESI-	M-H	182.045	6.72159	Level 1
130	5-Hete lactone	Carboxylic acid	C20H30O2	Leucine-d3	-	QZMAEYDIHWEEAF-XTDASVJISA-N	18.239	ESI+	[M+H-H2O]+	285.222	3.5849	Level 2
131	6-[(2,4-Dinitrophenyl)amino]hexanoic acid	Carboxylic acid	C12H15N3O6	SM d18:1/12:0	-	ZYUWUKIAUDIXCQ-UHFFFAOYSA-N	8.619	ESI+	[M+H]+	298.104	15.1002	Level 2
132	9,10-Dihydrojasmonic acid	Carboxylic acid	C12H20O3	Phe-Trp-13C9,15N	-	PQEYTAGBXNEUQL-NXEZZACHSA-N	13.956	ESI-	[M-H]-	211.133	2.82928	Level 2
133	9-Methoxycarbonyldec-9-enoic acid	Carboxylic acid	C12H20O4	Carnitine C16:0-d3	-	ZUNJWEGRDSXKIO-UHFFFAOYSA-N	13.201	ESI+	[M+H]+	229.144	3.0388	Level 2
134	Aconitic acid	Carboxylic acid	C6H6O6	Phenylalanine-d5	HMDB0000072	GTZCVFVGUGFEME-IWQZZHSRSA-N	3.985	ESI-	M-H	173.009	22.3226	Level 1
135	alpha Amino 3 hydroxy 5 methyl 4 isoxazolepropionic Acid	Carboxylic acid	C7H10N2O4	Tyrosine-d4	HMDB0248356	UUDAMDVQRQNNHZ-UHFFFAOYSA-N	4.896	ESI-	[M-H]-	185.056	7.85762	Level 2
136	Aminolevulinic Acid	Carboxylic acid	C5H9NO3	Homocystine-d8	HMDB0001149	ZGXJTSGNIOSYLO-UHFFFAOYSA-N	3.923	ESI-	M-H	130.05	3.8532	Level 1
137	Anthranilic acid	Carboxylic acid	C7H7NO2	Phenylalanine-d5	HMDB0001123	RWZYAGGXGHYGMB-UHFFFAOYSA-N	5.544	ESI+	[M+H]+	138.056	11.3063	Level 1
138	Azelaic acid	Carboxylic acid	C9H16O4	Taurine-d4	HMDB0000784	BDJRBEYXGGNYIS-UHFFFAOYSA-N	10.331	ESI-	M-H	187.097	2.73385	Level 1
139	Calcium pantothenate	Carboxylic acid	C9H17NO5	4-Hydroxyproline-d3	HMDB0303373	FAPWYRCQGJNNSJ-UBKPKTQASA-L	3.528	ESI-	M-H	218.103	9.57685	Level 1
140	Cinnamic acid	Carboxylic acid	C9H8O2	Phenylalanine-d5	HMDB0000930	WBYWAXJHAXSJNI-VOTSOKGWSA-N	4.705	ESI+	[M+NH4]+	166.087	3.46642	Level 1
141	Citramalic acid	Carboxylic acid	C5H8O5	Ornithine-13C5	HMDB0000426	XFTRTWQBIOMVPK-UHFFFAOYSA-N	8.479	ESI-	[M-H]-	147.029	8.85974	Level 2
142	Citric Acid	Carboxylic acid	C6H8O7	FFA 16:0-d3	HMDB0000094	KRKNYBCHXYNGOX-UHFFFAOYSA-N	7.801	ESI-	[M-H]-	191.019	8.18634	Level 2
143	CMPF	Carboxylic acid	C12H16O5	CA-d4	HMDB0061112	WMCQWXZMVIETAO-UHFFFAOYSA-N	14.584	ESI+	[M+H]+	241.108	1.12574	Level 2
144	Creatinine	Carboxylic acid	C4H7N3O	Homocystine-d8	HMDB0000562	DDRJAANPRJIHGJ-UHFFFAOYSA-N	3.922	ESI+	[M+H]+	114.067	3.28187	Level 1
145	Curvulin	Carboxylic acid	C12H14O5	SM d18:1/12:0	-	TURXCFUGBPBPRS-UHFFFAOYSA-N	12.631	ESI+	[M+H]+	239.092	4.90986	Level 2
146	D-2-Aminobutyric acid	Carboxylic acid	C4H9NO2	CDCA-d4	HMDB0000650	QWCKQJZIFLGMSD-GSVOUGTGSA-N	6.717	ESI+	[M+H]+	104.071	12.5183	Level 1
147	Daidzein	Carboxylic acid	C15H10O4	Tryptophan-d5	HMDB0003312	ZQSIJRDFPHDXIC-UHFFFAOYSA-N	8.604	ESI-	[M-H]-	253.05	9.47627	Level 2
148	Ecgonine	Carboxylic acid	C9H15NO3	Tryptophan-d5	HMDB0006548	PHMBVCPLDPDESM-UHFFFAOYSA-N	4.818	ESI+	[M+H]+	186.113	6.59938	Level 2
149	Ectoine	Carboxylic acid	C6H10N2O2	Tyrosine-d4	HMDB0240650	WQXNXVUDBPYKBA-YFKPBYRVSA-N	4.898	ESI-	[M-H]-	141.066	7.04724	Level 2
150	Ethyl 3,4-dihydroxybenzoate	Carboxylic acid	C9H10O4	Leucine-d3	HMDB0252031	KBPUBCVJHFXPOC-UHFFFAOYSA-N	15.298	ESI+	[M+H]+	183.066	2.45828	Level 1
151	Fumaric acid	Carboxylic acid	C4H4O4	FFA 18:0-d3	HMDB0249450	VZCYOOQTPOCHFL-UHFFFAOYSA-N	4.797	ESI-	[M-H]-	115.003	16.5993	Level 2
152	Gamma-Aminobutyric Acid	Carboxylic acid	C4H9NO2	Lysine-d4	HMDB0000112	BTCSSZJGUNDROE-UHFFFAOYSA-N	6.749	ESI-	[M-H]-	102.056	10.2305	Level 2
153	Gluconic acid	Carboxylic acid	C6H12O7	Glutamic acid-d3	HMDB0000625	RGHNJXZEOKUKBD-SQOUGZDYSA-N	7.704	ESI-	M-H	195.05	14.1333	Level 1
154	Glucuronic acid	Carboxylic acid	C6H10O7	Homocystine-d8	HMDB0000127	IAJILQKETJEXLJ-QTBDOELSSA-N	8.307	ESI-	M-H	193.035	5.24732	Level 1
155	Glyceric acid	Carboxylic acid	C3H6O4	Ornithine-13C5	HMDB0000139	RBNPOMFGQQGHHO-UWTATZPHSA-N	4.861	ESI-	[M-H]-	105.019	9.29837	Level 2
156	Hippuric acid	Carboxylic acid	C9H9NO3	Homocystine-d8	HMDB0000714	QIAFMBKCNZACKA-UHFFFAOYSA-N	11.137	ESI-	M-H	178.05	7.79545	Level 1
157	Homovanillic Acid	Carboxylic acid	C9H10O4	Phenylalanine-d5	HMDB0000118	QRMZSPFSDQBLIX-UHFFFAOYSA-N	3.516	ESI-	M-H	181.05	21.8044	Level 1
158	Hydantoin-5-propionic acid	Carboxylic acid	C6H8N2O4	Tryptophan-d5	HMDB0001212	VWFWNXQAMGDPGG-UHFFFAOYSA-N	3.686	ESI-	M-H	171.041	14.191	Level 1
159	Hymeglusin	Carboxylic acid	C18H28O5	Homocystine-d8	-	ODCZJZWSXPVLAW-KXCGKLMDSA-N	12.584	ESI-	[M-H]-	323.186	7.1247	Level 2
160	Hypotaurine	Carboxylic acid	C2H7NO2S	FFA 16:0-d3	HMDB0000965	VVIUBCNYACGLLV-UHFFFAOYSA-N	7.148	ESI-	[M-H]-	108.012	8.95664	Level 2
161	Indoxyl glucuronide	Carboxylic acid	C14H15NO7	Tryptophan-d5	HMDB0010319	KUYNOZVWCFXSNE-BYNIDDHOSA-N	4.682	ESI-	[M-H]-	308.077	13.394	Level 2
162	Kynurenic acid	Carboxylic acid	C10H7NO3	Phenylalanine-d5	HMDB0000715	HCZHHEIFKROPDY-UHFFFAOYSA-N	4.542	ESI+	[M+H]+	190.05	4.6684	Level 2
163	Kynurenine	Carboxylic acid	C10H12N2O3	Taurine-d4	HMDB0000684	YGPSJZOEDVAXAB-QMMMGPOBSA-N	4.749	ESI+	[M+H]+	209.093	6.26252	Level 1
164	Lichesterinic acid	Carboxylic acid	C19H32O4	Glutamic acid-d3	-	SLQVVNFTCYVCPB-INIZCTEOSA-N	14.195	ESI-	[M-H]-	323.222	13.3767	Level 2
165	L-Malic acid	Carboxylic acid	C4H6O5	Phe-Trp-13C9,15N	HMDB0000156	BJEPYKJPYRNKOW-REOHCLBHSA-N	8.467	ESI-	[M-H]-	133.014	6.94721	Level 2
166	Meglutol	Carboxylic acid	C6H10O5	Homocystine-d8	HMDB0000355	NPOAOTPXWNWTSH-UHFFFAOYSA-N	3.951	ESI-	M-H	161.045	9.60575	Level 1
167	Methyl arachidonate	Carboxylic acid	C21H34O2	Hippuric acid-d5	HMDB0062594	OFIDNKMQBYGNIW-ZKWNWVNESA-N	20.611	ESI+	[M+NH4]+	336.29	16.5703	Level 1
168	Methylimidazoleacetic acid	Carboxylic acid	C6H8N2O2	Leucine-d3	HMDB0002820	ZHCKPJGJQOPTLB-UHFFFAOYSA-N	6.808	ESI+	[M+H]+	141.066	2.42253	Level 2
169	Mevalonic acid 5-pyrophosphate	Carboxylic acid	C6H14O10P2	Phe-Trp-13C9,15N	HMDB0001981	SIGQQUBJQXSAMW-LURJTMIESA-N	9.121	ESI-	[M-H]-	306.998	5.74015	Level 2
170	Monoethyl fumarate	Carboxylic acid	C6H8O4	FFA 16:0-d3	HMDB0246416	XLYMOEINVGRTEX-UHFFFAOYSA-N	5.765	ESI-	[M-H]-	143.034	8.32567	Level 2
171	N-Acetylneuraminic acid	Carboxylic acid	C11H19NO9	Taurine-d4	HMDB0000230	SQVRNKJHWKZAKO-PFQGKNLYSA-N	8.115	ESI-	M-H	308.098	4.48318	Level 1
172	Nipecotic acid	Carboxylic acid	C6H11NO2	CA-d4	HMDB0255618	XJLSEXAGTJCILF-UHFFFAOYSA-N	8.564	ESI+	[M+H]+	130.087	1.56704	Level 1
173	Nonactinic acid	Carboxylic acid	C10H18O4	Hippuric acid-d5	-	IVOODSRSVJPWLY-UHFFFAOYSA-N	13.671	ESI+	[M+H-H2O]+	185.118	16.7937	Level 2
174	p-Cresol sulfate	Carboxylic acid	C7H8O4S	Ornithine-13C5	HMDB0011635	WGNAKZGUSRVWRH-UHFFFAOYSA-N	11.977	ESI-	[M-H]-	187.007	10.0477	Level 2
175	Pertusaric acid	Carboxylic acid	C21H34O5	CA-d4	-	SKQHRBRVCRUFSX-UHFFFAOYSA-N	19.345	ESI-	[M-H]-	365.233	7.69159	Level 2
176	p-Hydroxyphenyllactic acid	Carboxylic acid	C9H10O4	Ornithine-13C5	HMDB0000755	JVGVDSSUAVXRDY-UHFFFAOYSA-N	10.332	ESI-	[M-H]-	181.05	24.3327	Level 2
177	Pipecolic acid	Carboxylic acid	C6H11NO2	Lysine-d4	HMDB0000070	HXEACLLIILLPRG-UHFFFAOYSA-N	4.842	ESI+	[M+H]+	130.087	2.50645	Level 2
178	Quercetin	Carboxylic acid	C15H10O7	Cer(d18:1/17:0)	HMDB0005794	REFJWTPEDVJJIY-UHFFFAOYSA-N	6.492	ESI+	[M+H]+	303.05	20.3859	Level 2
179	Sebacic acid	Carboxylic acid	C10H18O4	Ornithine-13C5	HMDB0000792	CXMXRPHRNRROMY-UHFFFAOYSA-N	12.347	ESI-	[M-H]-	201.113	23.4524	Level 2
180	Succinic Acid	Carboxylic acid	C4H6O4	Tryptophan-d5	HMDB0000254	KDYFGRWQOYBRFD-UHFFFAOYSA-N	3.551	ESI-	[M-H]-	117.019	7.37169	Level 2
181	Taurine	Carboxylic acid	C2H7NO3S	Taurine-d4	HMDB0000251	XOAAWQZATWQOTB-UHFFFAOYSA-N	6.478	ESI-	M-H	124.007	1.17001	Level 1
182	tert-Butyl (2S)-2-hydroxybutanoate	Carboxylic acid	C8H16O3	PE(15:0/15:0)	-	UPRLOYNUXQZAPJ-LURJTMIESA-N	13.427	ESI+	[M+H]+	161.118	11.4297	Level 1
183	Threonic acid	Carboxylic acid	C4H8O5	Homocystine-d8	HMDB0000943	JPIJQSOTBSSVTP-STHAYSLISA-N	6.821	ESI-	M-H	135.029	4.8597	Level 1
184	Uric Acid	Carboxylic acid	C5H4N4O3	4-Hydroxyproline-d3	HMDB0000289	LEHOTFFKMJEONL-UHFFFAOYSA-N	5.784	ESI-	M-H	167.021	13.7376	Level 1
185	CAR 10:0	Carnitine	C17H33NO4	Carnitine C10:0-d3	HMDB0062631	LZOSYCMHQXPBFU-UHFFFAOYSA-N	14.966	ESI+	[M+H]+	316.249	1.33704	Level 1
186	CAR 11:0	Carnitine	C18H35NO4	Lysine-d4	HMDB0013321	FPUYBGZEWPJSDX-UHFFFAOYSA-N	15.487	ESI+	[M+H]+	330.264	2.93515	Level 2
187	CAR 12:0	Carnitine	C19H37NO4	Carnitine C12:0-d3	HMDB0002250	FUJLYHJROOYKRA-QGZVFWFLSA-N	16.615	ESI+	[M+H]+	344.28	1.23502	Level 1
188	CAR 13:0	Carnitine	C20H39NO4	Guanosine-13C,15N2	HMDB0241308	OLAOWMDKXPIITQ-UHFFFAOYSA-N	17.092	ESI+	[M+H]+	358.296	3.85653	Level 2
189	CAR 13:1	Carnitine	C20H37NO4	Carnitine C16:0-d3	HMDB0241316	HPQYHPXAWCGFCS-UHFFFAOYSA-N	16.536	ESI+	[M+H]+	356.28	3.84414	Level 2
190	CAR 14:0	Carnitine	C21H41NO4	Carnitine C12:0-d3	HMDB0005066	PSHXNVGSVNEJBD-LJQANCHMSA-N	17.971	ESI+	[M+H]+	372.311	2.62073	Level 1
191	CAR 14:1	Carnitine	C21H39NO4	Carnitine C12:0-d3	-	ABVVZYXTZLEOHP-UHFFFAOYSA-N	17.263	ESI+	[M+H]+	370.296	3.14427	Level 2
192	CAR 15:2	Carnitine	C22H39NO4	Guanosine-13C,15N2	-	DPVOVCRNFWGEFP-UHFFFAOYSA-N	16.674	ESI+	[M+H]+	382.296	13.7386	Level 2
193	CAR 16:0	Carnitine	C23H45NO4	Carnitine C16:0-d3	HMDB0240783	XOMRRQXKHMYMOC-UHFFFAOYSA-N	19.011	ESI+	[M+H]+	400.343	3.28156	Level 1
194	CAR 16:1	Carnitine	C23H43NO4	Carnitine C12:0-d3	-	JFAGPSOZZSTLRF-UHFFFAOYSA-N	18.305	ESI+	[M+H]+	398.327	2.95294	Level 2
195	CAR 16:2	Carnitine	C23H41NO4	Carnitine C12:0-d3	-	CMVGCHSJDXKPBB-UHFFFAOYSA-N	17.641	ESI+	[M+H]+	396.311	2.61244	Level 2
196	CAR 16:4	Carnitine	C23H37NO4	LPE 13:0	-	VANBVBKSJLSPOC-UHFFFAOYSA-N	16.523	ESI+	[M+H]+	392.28	5.0757	Level 2
197	CAR 18:0	Carnitine	C25H49NO4	Carnitine C16:0-d3	HMDB0000848	FNPHNLNTJNMAEE-HSZRJFAPSA-N	19.817	ESI+	[M+H]+	428.374	4.38109	Level 1
198	CAR 18:1	Carnitine	C25H47NO4	Carnitine C10:0-d3	HMDB0006464	IPOLTUVFXFHAHI-SEYXRHQNSA-N	19.206	ESI+	[M+H]+	426.358	3.72578	Level 1
199	CAR 18:2	Carnitine	C25H45NO4	Carnitine C16:0-d3	-	MJLXQSQYKZWZCB-UHFFFAOYSA-N	18.64	ESI+	[M+H]+	424.343	2.28984	Level 2
200	CAR 18:3	Carnitine	C25H43NO4	Carnitine C6:0-d3	-	WJCRATGUUISKDG-UHFFFAOYSA-N	18.101	ESI+	[M+H]+	422.327	2.74301	Level 2
201	CAR 2:0	Carnitine	C9H17NO4	Carnitine C2:0-d3	HMDB0000201	RDHQFKQIGNGIED-MRVPVSSYSA-N	4.669	ESI+	[M+H]+	204.124	2.46845	Level 1
202	CAR 20:3	Carnitine	C27H47NO4	Guanosine-13C,15N2	HMDB0241582	SRNPFTYGRLBDNK-UHFFFAOYSA-N	19.011	ESI+	[M+H]+	450.358	16.2831	Level 2
203	CAR 20:4	Carnitine	C27H45NO4	Carnitine C6:0-d3	HMDB0241588	VPEBWBVNBKLXSR-UHFFFAOYSA-N	18.629	ESI+	[M+H]+	448.343	3.52372	Level 2
204	CAR 22:6	Carnitine	C29H45NO4	LPE 13:0	HMDB0241612	WLLMYDQRCSWAST-UHFFFAOYSA-N	18.6	ESI+	[M+H]+	472.343	9.6099	Level 2
205	CAR 24:0	Carnitine	C31H61NO4	Ornithine-13C5	-	YDUFZFUYBBPVLJ-UHFFFAOYSA-N	21.54	ESI+	[M+H]+	512.468	3.67278	Level 2
206	CAR 26:0	Carnitine	C33H65NO4	NT-methylhistidine-d3	HMDB0006347	KOCKWDDTAHPJSX-UHFFFAOYSA-N	22.125	ESI+	[M+H]+	540.499	5.05218	Level 2
207	CAR 26:1	Carnitine	C33H63NO4	SM d18:1/12:0	-	GERIQWUDUKIXEZ-UHFFFAOYSA-N	21.594	ESI+	[M+H]+	538.484	3.15347	Level 2
208	CAR 3:0	Carnitine	C10H19NO4	LPE 13:0	HMDB0062514	UFAHZIUFPNSHSL-UHFFFAOYSA-N	4.421	ESI+	[M+H]+	218.139	1.91042	Level 1
209	CAR 4:0	Carnitine	C11H21NO4	LPC 19:0	HMDB0002013	QWYFHHGCZUCMBN-SECBINFHSA-N	4.058	ESI+	[M+H]+	232.155	3.28988	Level 1
210	CAR 6:0	Carnitine	C13H25NO4	Carnitine C6:0-d3	HMDB0000705	VVPRQWTYSNDTEA-UHFFFAOYSA-N	3.637	ESI+	[M+H]+	260.186	1.87006	Level 1
211	CAR 8:0	Carnitine	C15H29NO4	Carnitine C10:0-d3	-	CXTATJFJDMJMIY-UHFFFAOYSA-N	13.359	ESI+	[M+H]+	288.217	2.51444	Level 1
212	CAR 8:1	Carnitine	C15H27NO4	Carnitine C6:0-d3	HMDB0013324	LOSHAHDSFZXVCT-LXKVQUBZSA-N	3.496	ESI+	[M+H]+	286.202	8.38045	Level 2
213	Carnitine	Carnitine	C7H15NO3	Leucine-d3	HMDB0062496	PHIQHXFUZVPYII-UHFFFAOYSA-N	4.934	ESI+	[M+H]+	162.113	2.6361	Level 1
214	Cer 34:1;O2	Ceramide	C34H67NO3	Tyrosine-d4	HMDB0249508	YDNKGFDKKRUKPY-UHFFFAOYSA-N	22.86	ESI+	[M+H]+	538.52	19.681	Level 2
215	CerP 30:1;O2	Ceramide	C30H60NO6P	Phe-Trp-13C9,15N	HMDB0010699	KXEMZGPJXBKYJP-VARSQMIESA-N	23.15	ESI-	[M-H]-	560.408	8.85245	Level 2
216	CerP 32:4;O2	Ceramide	C32H58NO6P	Phe-Trp-13C9,15N	-	DCYXXJMDFXEQEK-UHFFFAOYSA-N	23.158	ESI-	[M-H]-	582.392	18.7953	Level 2
217	Hex2Cer 34:1;O2|Hex2Cer 18:1;O2/16:0	Ceramide	C46H87NO13	Carnitine C4:0-d3	-	HLIJNIKSBCIDGO-UHFFFAOYSA-N	22.388	ESI+	[M+H]+	862.626	5.52887	Level 2
218	4-O-.beta.-Galactopyranosyl-D-mannopyranose	Energy	C12H22O11	Phenylalanine-d5	-	GUBGYTABKSRVRQ-GAQSDDIXSA-N	7.996	ESI-	[M-H]-	341.108	6.64551	Level 2
219	D-Lyxose	Energy	C5H10O5	Phenylalanine-d5	-	SRBFZHDQGSBBOR-AGQMPKSLSA-N	4.585	ESI-	[M-H]-	149.045	7.00233	Level 2
220	D-Quinovose	Energy	C6H12O5	Tyrosine-d4	HMDB0247051	SHZGCJCMOBCMKK-DVKNGEFBSA-N	4.419	ESI-	[M-H]-	163.061	6.05851	Level 2
221	D-RIBOSE	Energy	C5H10O5	Guanosine-13C,15N2	HMDB0000283	HMFHBZSHGGEWLO-SOOFDHNKSA-N	6.377	ESI-	[M-H]-	149.045	19.0838	Level 2
222	Glucose	Energy	C6H12O6	Phe-Trp-13C9,15N	HMDB0304632	GZCGUPFRVQAUEE-SLPGGIOYSA-N	4.884	ESI-	[M-H]-	179.056	12.7943	Level 2
223	N-Acetyl-D-galactosaminitol	Energy	C8H17NO6	Ornithine-13C5	-	DWAICOVNOFPYLS-OSMVPFSASA-N	7.475	ESI+	[M+H]+	224.113	2.53738	Level 2
224	Trehalose	Energy	C12H22O11	Homocystine-d8	HMDB0000975	HDTRYLNUVZCQOY-LIZSDCNHSA-N	7.584	ESI-	[M+HCOO]-	387.114	5.60971	Level 1
225	FA 10:1	Fatty acid	C10H18O2	Phe-Trp-13C9,15N	HMDB0242157	WXBXVVIUZANZAU-HJWRWDBZSA-N	14.011	ESI-	[M-H]-	169.123	3.46835	Level 2
226	FA 11:0	Fatty acid	C11H22O2	FFA 16:0-d3	HMDB0000947	ZDPHROOEEOARMN-UHFFFAOYSA-N	15.684	ESI-	M-H	185.154	12.0566	Level 1
227	FA 11:0;O	Fatty acid	C11H22O3	Phe-Trp-13C9,15N	-	KNRCBASNXNXUQQ-UHFFFAOYSA-N	12.655	ESI-	[M-H]-	201.149	3.6054	Level 2
228	FA 11:1	Fatty acid	C11H20O2	CA-d4	HMDB0033724	FRPZMMHWLSIFAZ-UHFFFAOYSA-N	14.72	ESI-	M-H	183.139	3.31401	Level 1
229	FA 12:0;O	Fatty acid	C12H24O3	CDCA-d4	-	MUCMKTPAZLSKTL-UHFFFAOYSA-N	15.313	ESI-	[M-H]-	215.165	4.24286	Level 2
230	FA 12:1	Fatty acid	C12H22O2	Tryptophan-d5	HMDB0000529	IJBFSOLHRKELLR-FPLPWBNLSA-N	15.662	ESI-	[M-H]-	197.154	5.53455	Level 2
231	FA 13:0	Fatty acid	C13H26O2	Ornithine-13C5	HMDB0000910	SZHOJFHSIKHZHA-UHFFFAOYSA-N	17.31	ESI-	M-H	213.185	17.4843	Level 1
232	FA 13:1	Fatty acid	C13H24O2	Guanosine-13C,15N2	-	KIWIPIAOWPKUNM-UHFFFAOYSA-N	16.509	ESI-	[M-H]-	211.17	5.74923	Level 2
233	FA 14:0	Fatty acid	C14H28O2	Phe-Trp-13C9,15N	HMDB0000806	TUNFSRHWOTWDNC-UHFFFAOYSA-N	17.98	ESI-	M-H	227.201	2.96733	Level 1
234	FA 14:1	Fatty acid	C14H26O2	CA-d4	HMDB0258881	YWWVWXASSLXJHU-UHFFFAOYSA-N	17.269	ESI-	[M-H]-	225.185	5.90861	Level 1
235	FA 14:2	Fatty acid	C14H24O2	CDCA-d4	-	RHOQRBVFJSAQTR-UHFFFAOYSA-N	16.46	ESI-	[M-H]-	223.17	3.67034	Level 2
236	FA 15:0	Fatty acid	C15H30O2	CDCA-d4	HMDB0000826	WQEPLUUGTLDZJY-UHFFFAOYSA-N	18.398	ESI-	[M-H]-	241.217	5.20794	Level 1
237	FA 15:1	Fatty acid	C15H28O2	CA-d4	-	DJCQJZKZUCHHAL-UHFFFAOYSA-N	17.913	ESI-	[M-H]-	239.201	6.36126	Level 2
238	FA 16:0	Fatty acid	C16H32O2	FFA 16:0-d3	HMDB0000220	IPCSVZSSVZVIGE-UHFFFAOYSA-N	19.1	ESI-	M-H	255.232	2.52423	Level 1
239	FA 16:0;O	Fatty acid	C16H32O3	Homocystine-d8	-	JGHSBPIZNUXPLA-UHFFFAOYSA-N	18.544	ESI-	[M-H]-	271.227	4.40227	Level 2
240	FA 16:1	Fatty acid	C16H30O2	CA-d4	HMDB0003229	SECPZKHBENQXJG-FPLPWBNLSA-N	18.323	ESI-	M-H	253.217	2.82372	Level 1
241	FA 16:3	Fatty acid	C16H26O2	Phe-Trp-13C9,15N	HMDB0302990	KBGYPXOSNDMZRV-UHFFFAOYSA-N	17.311	ESI-	[M-H]-	249.185	2.48099	Level 2
242	FA 16:4	Fatty acid	C16H24O2	Phe-Trp-13C9,15N	HMDB0253125	IVTCJQZAGWTMBZ-UHFFFAOYSA-N	16.6	ESI-	[M-H]-	247.17	3.9743	Level 2
243	FA 17:0	Fatty acid	C17H34O2	FFA 16:0-d3	HMDB0002259	KEMQGTRYUADPNZ-UHFFFAOYSA-N	19.631	ESI-	[M-H]-	269.248	7.65156	Level 2
244	FA 17:1	Fatty acid	C17H32O2	Homocystine-d8	-	QSBYPNXLFMSGKH-UHFFFAOYSA-N	18.891	ESI-	[M-H]-	267.232	3.83131	Level 2
245	FA 17:1;O2	Fatty acid	C17H32O4	CA-d4	-	AZANSJCEQIAFGI-UHFFFAOYSA-N	13.997	ESI-	[M-H]-	299.222	6.25885	Level 2
246	FA 17:2	Fatty acid	C17H30O2	CA-d4	HMDB0250290	LEIXEEFBKOMCEQ-UHFFFAOYSA-N	18.235	ESI-	[M-H]-	265.217	3.97873	Level 2
247	FA 17:3	Fatty acid	C17H28O2	CDCA-d4	-	FAFSAZIEJFMBBY-UHFFFAOYSA-N	17.604	ESI-	[M-H]-	263.201	7.79139	Level 2
248	FA 17:3;O	Fatty acid	C17H28O3	CDCA-d4	-	RRGVHYPZQAHGKF-UHFFFAOYSA-N	15.429	ESI-	[M-H]-	279.196	1.91223	Level 2
249	FA 18:0	Fatty acid	C18H36O2	CDCA-d4	HMDB0000827	QIQXTHQIDYTFRH-UHFFFAOYSA-N	20.404	ESI-	[M-H]-	283.264	4.92597	Level 1
250	FA 18:0;O	Fatty acid	C18H36O3	Taurine-d4	HMDB0061661	RKHXDCVAPIMDMG-UHFFFAOYSA-N	17.747	ESI-	[M-H]-	299.259	4.63108	Level 2
251	FA 18:0;O2	Fatty acid	C18H36O4	Phe-Trp-13C9,15N	HMDB0302281	VACHUYIREGFMSP-UHFFFAOYSA-N	16.242	ESI-	[M-H]-	315.254	5.53221	Level 2
252	FA 18:1	Fatty acid	C18H34O2	FFA 16:0-d3	HMDB0240219	UWHZIFQPPBDJPM-FPLPWBNLSA-N	20.908	ESI-	[M-H]-	281.248	8.66701	Level 2
253	FA 18:1;O	Fatty acid	C18H34O3	Tyrosine-d4	-	WBHHMMIMDMUBKC-QJWNTBNXSA-N	16.83	ESI-	[M-H]-	297.243	15.3772	Level 2
254	FA 18:1;O2	Fatty acid	C18H34O4	CDCA-d4	HMDB0000782	BNJOQKFENDDGSC-UHFFFAOYSA-N	14.851	ESI-	[M-H]-	313.238	4.01201	Level 2
255	FA 18:2	Fatty acid	C18H32O2	CDCA-d4	HMDB0247706	OYHQOLUKZRVURQ-UHFFFAOYSA-N	18.702	ESI-	[M-H]-	279.232	2.10951	Level 1
256	FA 18:2;O	Fatty acid	C18H32O3	Lysine-d4	-	UKRXAPMQXXXXTD-UHFFFAOYSA-N	16.477	ESI-	[M-H]-	295.227	7.72521	Level 2
257	FA 18:2;O2	Fatty acid	C18H32O4	Homocystine-d8	-	NMONGVDUESEHOK-UHFFFAOYSA-N	14.149	ESI-	[M-H]-	311.222	5.49043	Level 2
258	FA 18:3	Fatty acid	C18H30O2	Phe-Trp-13C9,15N	HMDB0030964	DTOSIQBPPRVQHS-UHFFFAOYSA-N	18.16	ESI-	[M-H]-	277.217	2.76664	Level 1
259	FA 18:3;O	Fatty acid	C18H30O3	CDCA-d4	-	HKSDVVJONLXYKL-UHFFFAOYSA-N	15.786	ESI-	[M-H]-	293.212	7.06377	Level 2
260	FA 18:3;O2	Fatty acid	C18H30O4	Phe-Trp-13C9,15N	-	VWKNCZXDXPBMJN-UHFFFAOYSA-N	13.61	ESI-	[M-H]-	309.207	7.16886	Level 2
261	FA 18:4	Fatty acid	C18H28O2	Phe-Trp-13C9,15N	HMDB0247114	JIWBIWFOSCKQMA-UHFFFAOYSA-N	17.649	ESI-	[M-H]-	275.201	2.60761	Level 2
262	FA 18:4;O	Fatty acid	C18H28O3	Lysine-d4	-	IYEHRWJNUWAXAD-UHFFFAOYSA-N	18.285	ESI-	[M-H]-	291.196	15.1828	Level 2
263	FA 19:0	Fatty acid	C19H38O2	Phe-Trp-13C9,15N	HMDB0000772	ISYWECDDZWTKFF-UHFFFAOYSA-N	20.453	ESI-	[M-H]-	297.279	7.9471	Level 1
264	FA 19:0;O2	Fatty acid	C19H38O4	FFA 18:0-d3	-	VIQDMENBCDLKMA-UHFFFAOYSA-N	20.057	ESI-	[M-H]-	329.269	9.24549	Level 2
265	FA 19:1	Fatty acid	C19H36O2	CDCA-d4	-	YOKHLRHWEXTWJR-UHFFFAOYSA-N	19.826	ESI-	[M-H]-	295.264	4.58222	Level 2
266	FA 19:1;O2	Fatty acid	C19H36O4	FFA 16:0-d3	-	YJUJLYFUPHRQKT-UHFFFAOYSA-N	15.267	ESI-	[M-H]-	327.254	6.83246	Level 2
267	FA 19:3	Fatty acid	C19H32O2	Guanosine-13C,15N2	-	CNIDZCYLBMSLGW-UHFFFAOYSA-N	18.424	ESI-	[M-H]-	291.232	5.89192	Level 2
268	FA 20:1	Fatty acid	C20H38O2	CDCA-d4	-	BITHHVVYSMSWAG-UHFFFAOYSA-N	20.217	ESI-	[M-H]-	309.279	4.65311	Level 1
269	FA 20:2	Fatty acid	C20H36O2	CDCA-d4	HMDB0244372	XSXIVVZCUAHUJO-UHFFFAOYSA-N	19.683	ESI-	[M-H]-	307.264	4.00052	Level 2
270	FA 20:3	Fatty acid	C20H34O2	CDCA-d4	HMDB0244373	AHANXAKGNAKFSK-UHFFFAOYSA-N	19.179	ESI-	[M-H]-	305.248	1.96023	Level 1
271	FA 20:4	Fatty acid	C20H32O2	Phe-Trp-13C9,15N	HMDB0001043	YZXBAPSDXZZRGB-DOFZRALJSA-N	18.783	ESI-	[M-H]-	303.232	2.81442	Level 2
272	FA 20:4;O	Fatty acid	C20H32O3	CA-d4	HMDB0011134	KGIJOOYOSFUGPC-XTDASVJISA-N	17.524	ESI-	[M-H]-	319.227	7.95886	Level 2
273	FA 20:4;O2	Fatty acid	C20H32O4	FFA 16:0-d3	-	WTTRVKVOOJHCSN-UHFFFAOYSA-N	14.233	ESI-	[M-H]-	335.222	10.7243	Level 2
274	FA 20:5	Fatty acid	C20H30O2	Phe-Trp-13C9,15N	HMDB0001999	JAZBEHYOTPTENJ-JLNKQSITSA-N	18.222	ESI-	[M-H]-	301.217	2.56171	Level 2
275	FA 20:5;O2	Fatty acid	C20H30O4	CDCA-d4	-	RWHZIKMTLJOOEH-UHFFFAOYSA-N	18.7	ESI-	[M-H]-	333.207	6.96854	Level 2
276	FA 21:3	Fatty acid	C21H36O2	Tyrosine-d4	-	WHLKAPQFQWYTAL-UHFFFAOYSA-N	16.026	ESI-	[M-H]-	319.264	5.56963	Level 2
277	FA 21:3;O	Fatty acid	C21H36O3	CDCA-d4	-	CRDFNKIUQSIOBS-UHFFFAOYSA-N	19.348	ESI-	[M-H]-	335.259	9.29229	Level 2
278	FA 21:5	Fatty acid	C21H32O2	CDCA-d4	-	OQOCQFSPEWCSDO-UHFFFAOYSA-N	18.646	ESI-	[M-H]-	315.232	11.5625	Level 2
279	FA 22:0	Fatty acid	C22H44O2	FFA 16:0-d3	HMDB0000944	UKMSUNONTOPOIO-UHFFFAOYSA-N	21.575	ESI-	M-H	339.326	6.97777	Level 1
280	FA 22:1	Fatty acid	C22H42O2	FFA 16:0-d3	HMDB0249369	DPUOLQHDNGRHBS-UHFFFAOYSA-N	20.95	ESI-	[M-H]-	337.311	4.573	Level 1
281	FA 22:1;O2	Fatty acid	C22H42O4	Homocystine-d8	-	UBHSEJBILMDXFU-UHFFFAOYSA-N	17.275	ESI-	[M-H]-	369.3	4.78314	Level 2
282	FA 22:2	Fatty acid	C22H40O2	5-Hydroxy-L-tryptophan-d4	HMDB0244521	HVGRZDASOHMCSK-UHFFFAOYSA-N	20.454	ESI-	[M-H]-	335.295	5.21504	Level 2
283	FA 22:2;O2	Fatty acid	C22H40O4	Phe-Trp-13C9,15N	-	KXGWEHMGNWPQBJ-UHFFFAOYSA-N	16.324	ESI-	[M-H]-	367.285	14.5137	Level 2
284	FA 22:3	Fatty acid	C22H38O2	Tryptophan-d5	-	RILVNGKQIULBOQ-UHFFFAOYSA-N	19.995	ESI-	[M-H]-	333.279	13.6071	Level 2
285	FA 22:5	Fatty acid	C22H34O2	CA-d4	HMDB0247288	YUFFSWGQGVEMMI-UHFFFAOYSA-N	19.279	ESI-	[M-H]-	329.248	6.85551	Level 2
286	FA 22:6	Fatty acid	C22H32O2	Phe-Trp-13C9,15N	HMDB0251558	MBMBGCFOFBJSGT-UHFFFAOYSA-N	18.786	ESI-	[M-H]-	327.232	3.00298	Level 2
287	FA 22:6;O	Fatty acid	C22H32O3	Tyrosine-d4	HMDB10213	ZHBVYDMSPDDAKE-UHFFFAOYSA-N	16.997	ESI-	[M-H]-	343.227	6.25454	Level 2
288	FA 23:0	Fatty acid	C23H46O2	Guanosine-13C,15N2	HMDB0001160	XEZVDURJDFGERA-UHFFFAOYSA-N	22.34	ESI-	[M-H]-	353.342	19.5885	Level 2
289	FA 23:1	Fatty acid	C23H44O2	Phe-Trp-13C9,15N	-	FDQDIODRWMXTEH-UHFFFAOYSA-N	21.105	ESI-	[M-H]-	351.326	6.7385	Level 2
290	FA 24:1	Fatty acid	C24H46O2	Homocystine-d8	HMDB0002368	GWHCXVQVJPWHRF-KTKRTIGZSA-N	21.667	ESI-	M-H	365.342	2.65805	Level 1
291	FA 24:2	Fatty acid	C24H44O2	FFA 16:0-d3	-	SVGHINSTYCDBLY-UHFFFAOYSA-N	21.169	ESI-	[M-H]-	363.326	5.28699	Level 2
292	FA 24:4	Fatty acid	C24H40O2	5-Hydroxy-L-tryptophan-d4	-	IWSADGAQVYYXMM-UHFFFAOYSA-N	20.268	ESI-	[M-H]-	359.295	7.04935	Level 2
293	FA 24:5	Fatty acid	C24H38O2	CDCA-d4	HMDB0247624	NPTIBOCVSPURCS-UHFFFAOYSA-N	19.867	ESI-	[M-H]-	357.279	5.15926	Level 2
294	FA 24:6	Fatty acid	C24H36O2	FFA 16:0-d3	HMDB0013025	YHGJECVSSKXFCJ-UHFFFAOYSA-N	19.498	ESI-	[M-H]-	355.264	7.2666	Level 2
295	FA 25:1	Fatty acid	C25H48O2	Phe-Trp-13C9,15N	-	DZLXTCFDFPGICK-UHFFFAOYSA-N	21.863	ESI-	[M-H]-	379.358	9.38951	Level 2
296	FA 26:3	Fatty acid	C26H46O2	Homocystine-d8	-	PPWULRMBSAZFCH-UHFFFAOYSA-N	21.323	ESI-	[M-H]-	389.342	3.63756	Level 2
297	FA 26:4	Fatty acid	C26H44O2	Homocystine-d8	-	QTHRQKVBXAEHTC-UHFFFAOYSA-N	20.931	ESI-	[M-H]-	387.326	8.87966	Level 2
298	FAHFA 22:1;O2	Fatty acid	C22H42O5	Homocystine-d8	-	ZQEUMOKDJCSNHB-IHRHECOVSA-N	17.153	ESI-	[M-H]-	385.295	7.3565	Level 2
299	Arachidonoyl-N,N-dimethylamide	Fatty acidtty amide	C22H37NO	Phenylalanine-d5	-	FCHAVFLICKAOOF-GKFVBPDJSA-N	20.526	ESI+	[M+H]+	332.295	6.11937	Level 2
300	Docosanamide	Fatty acidtty amide	C22H45NO	CA-d4	HMDB0000583	ORAWFNKFUWGRJG-UHFFFAOYSA-N	21.668	ESI+	[M+H]+	340.358	2.98218	Level 2
301	Dodeca-2(E),4(E)-dienoic acid	Fatty acidtty amide	C12H20O2	CDCA-d4	-	HQSBWLQFLLMPKC-BNFZFUHLSA-N	20.676	ESI+	[M+H-H2O]+	179.144	8.9519	Level 2
302	Erucamide	Fatty acidtty amide	C22H43NO	Leucine-d3	-	UAUDZVJPLUQNMU-KTKRTIGZSA-N	21.112	ESI+	[M+H]+	338.342	2.61924	Level 1
303	Heptadecanoyl Ethanolamide	Fatty acidtty amide	C19H39NO2	Lysine-d4	-	GCCFMSAXQJECNH-UHFFFAOYSA-N	20.073	ESI+	[M+H]+	314.306	4.83097	Level 2
304	Linoleoyl ethanolamide	Fatty acidtty amide	C20H37NO2	Leucine-d3	HMDB0012252	KQXDGUVSAAQARU-HZJYTTRNSA-N	20.275	ESI+	[M+H]+	324.29	2.56611	Level 2
305	N-(2-hydroxyethyl)icosanamide	Fatty acidtty amide	C22H45NO2	Lysine-d4	HMDB0248559	AUJVQJHODMISJP-UHFFFAOYSA-N	18.904	ESI+	[M+H]+	356.353	7.66881	Level 2
306	NAE 15:3	Fatty acidtty amide	C17H29NO2	CA-d4	-	WOLLMRPSNJLQHR-UHFFFAOYSA-N	18.147	ESI+	[M+H]+	280.228	2.16815	Level 2
307	NAE 18:1	Fatty acidtty amide	C20H39NO2	Hippuric acid-d5	HMDB0247608	BOWVQLFMWHZBEF-UHFFFAOYSA-N	21.016	ESI+	[M+H]+	326.306	22.8166	Level 2
308	NAE 18:5	Fatty acidtty amide	C20H31NO2	Lysine-d4	-	WBNPIPVSMREONW-UHFFFAOYSA-N	17.08	ESI+	[M+H]+	318.243	8.20533	Level 2
309	NAE 20:1	Fatty acidtty amide	C22H43NO2	CA-d4	-	YDKRGMXLBRWZJR-UHFFFAOYSA-N	19.747	ESI+	[M+H]+	354.337	2.38824	Level 2
310	NAE 20:2	Fatty acidtty amide	C22H41NO2	Guanosine-13C,15N2	-	MWQCBVWCBTUPDQ-UHFFFAOYSA-N	20.871	ESI+	[M+H]+	352.322	26.8144	Level 2
311	NAE 20:3	Fatty acidtty amide	C22H39NO2	Ornithine-13C5	-	IGERBKTWMBMXMC-UHFFFAOYSA-N	20.493	ESI+	[M+H]+	350.306	2.22146	Level 2
312	NAE 21:2	Fatty acidtty amide	C23H43NO2	Phenylalanine-d5	-	MEOHGYOFYYJDPV-UHFFFAOYSA-N	20.919	ESI+	[M+H]+	366.337	17.5303	Level 2
313	NAE 21:4	Fatty acidtty amide	C23H39NO2	Hippuric acid-d5	-	JNVIWOANMZPACT-UHFFFAOYSA-N	20.765	ESI+	[M+H]+	362.306	18.6811	Level 2
314	NAE 22:4	Fatty acidtty amide	C24H41NO2	Lysine-d4	-	NCECEOHSWNHORM-UHFFFAOYSA-N	19.747	ESI+	[M+H]+	376.322	4.9151	Level 2
315	NAE 5:0	Fatty acidtty amide	C7H15NO2	Phenylalanine-d5	-	NURPOXDFZKXLRW-UHFFFAOYSA-N	6.751	ESI+	[M+H]+	146.118	10.1773	Level 2
316	NAE 6:0	Fatty acidtty amide	C8H17NO2	CDCA-d4	-	HVVJCLNYMSTOMR-UHFFFAOYSA-N	4.482	ESI+	[M+H]+	160.134	1.6094	Level 2
317	N-Methylacetoacetamide	Fatty acidtty amide	C5H9NO2	CA-d4	-	ATWLCPHWYPSRBQ-UHFFFAOYSA-N	8.6	ESI+	[M+NH4]+	133.098	1.77289	Level 1
318	Oleamide	Fatty acidtty amide	C18H35NO	CA-d4	HMDB0002117	FATBGEAMYMYZAF-KTKRTIGZSA-N	19.856	ESI+	[M+H]+	282.28	1.28783	Level 1
319	Oleoyl ethylamide	Fatty acidtty amide	C20H39NO	CDCA-d4	-	JZJYYCFYGXPUMF-QXMHVHEDSA-N	20.522	ESI+	[M+H]+	310.311	1.8488	Level 2
320	2-(1-(3-dimethylaminopropyl)-5-methoxyindol-3-yl)-3-(1h-indol-3-yl)maleimide	Indoles	C26H26N4O3	Tryptophan-d5	HMDB0252906	LLJJDLHGZUOMQP-UHFFFAOYSA-N	18.054	ESI+	[M+H]+	443.208	7.84731	Level 2
321	3-Indolepropionic acid	Indoles	C11H11NO2	Glutamic acid-d3	HMDB0029738	KTHADMDGDNYQRX-UHFFFAOYSA-N	12.965	ESI+	[M+H]+	190.087	2.18485	Level 1
322	Indole-3-acetaldehyde	Indoles	C10H9NO	5-Hydroxy-L-tryptophan-d4	HMDB0001190	WYKPCRCESPDDQX-UHFFFAOYSA-M	4.099	ESI+	[M+H]+	160.076	4.48177	Level 1
323	Indole-3-acetic acid	Indoles	C10H9NO2	Phenylalanine-d5	HMDB0000197	SEOVTRFCIGRIMH-UHFFFAOYSA-N	12.667	ESI+	[M+H]+	176.071	8.12387	Level 1
324	Indole-3-acetonitrile	Indoles	C10H8N2	Hippuric acid-d5	HMDB0006524	DMCPFOBLJMLSNX-UHFFFAOYSA-N	4.75	ESI+	[M+H]+	157.077	11.6382	Level 2
325	Indole-3-acetyl-L-valine	Indoles	C15H18N2O3	Carnitine C10:0-d3	-	AZEGJHGXTSUPPG-AWEZNQCLSA-N	3.777	ESI+	[M+H]+	275.14	5.34335	Level 2
326	Indole-3-lactic acid	Indoles	C11H11NO3	Leucine-d3	-	XGILAAMKEQUXLS-UHFFFAOYSA-N	12.425	ESI+	[M+H]+	206.082	3.51114	Level 1
327	Indoline	Indoles	C8H9N	Phenylalanine-d5	HMDB0253472	LPAGFVYQRIESJQ-UHFFFAOYSA-N	4.677	ESI+	[M+H]+	120.081	5.62712	Level 1
328	LPA 12:0	Lysophosphatidic acid	C15H31O7P	LPE 13:0	HMDB0062319	STTKJLVEXMKLNA-UHFFFAOYSA-N	17.607	ESI-	[M-H]-	353.173	18.386	Level 2
329	LPA 14:0	Lysophosphatidic acid	C17H35O7P	LPE 13:0	HMDB0062321	FAZBDRGXCKPVJU-UHFFFAOYSA-N	19.019	ESI-	[M-H]-	381.204	24.9675	Level 1
330	LPA 15:0	Lysophosphatidic acid	C18H37O7P	FFA 18:0-d3	-	RZDCKQARKXMIQI-UHFFFAOYSA-N	19.597	ESI-	[M-H]-	395.22	11.7852	Level 2
331	LPA 16:0	Lysophosphatidic acid	C19H39O7P	FFA 16:0-d3	HMDB07853	YNDYKPRNFWPPFU-GOSISDBHSA-N	18.995	ESI-	M-H	409.236	6.30651	Level 1
332	LPA 16:1	Lysophosphatidic acid	C19H37O7P	LPE 13:0	-	GLGQZYWTNAOWHT-UHFFFAOYSA-N	19.339	ESI-	[M-H]-	407.22	11.6993	Level 2
333	LPA 17:0	Lysophosphatidic acid	C20H41O7P	Guanosine-13C,15N2	-	LGXQWPKTTPPJES-JQDLGSOUSA-L	20.567	ESI-	M-H	423.251	6.11539	Level 1
334	LPA 18:0	Lysophosphatidic acid	C21H43O7P	FFA 16:0-d3	HMDB0007854	LAYXSTYJRSVXIH-UHFFFAOYSA-N	21.011	ESI-	[M-H]-	437.267	5.70352	Level 2
335	LPA 18:1	Lysophosphatidic acid	C21H41O7P	4-Hydroxyproline-d3	HMDB07855	XGRLSUFHELJJAB-JGSYTFBMSA-M	19.246	ESI-	M-H	435.251	13.599	Level 1
336	LPA 18:2	Lysophosphatidic acid	C21H39O7P	FFA 16:0-d3	-	ZQTAMPRZFOOEEP-UHFFFAOYSA-N	19.711	ESI-	[M-H]-	433.236	6.99585	Level 2
337	LPA 18:3	Lysophosphatidic acid	C21H37O7P	Guanosine-13C,15N2	-	DVNZKWQUAXJYGB-UHFFFAOYSA-N	19.875	ESI-	[M-H]-	431.22	8.24713	Level 2
338	LPA 19:0	Lysophosphatidic acid	C22H45O7P	Guanosine-13C,15N2	HMDB0114746	YAERNOYIELLICR-UHFFFAOYSA-N	20.4	ESI-	[M-H]-	451.282	19.2052	Level 2
339	LPA 20:3	Lysophosphatidic acid	C23H41O7P	5-Hydroxy-L-tryptophan-d4	-	DMZXKNSNIJKINA-UHFFFAOYSA-N	21.012	ESI-	[M-H]-	459.251	7.70503	Level 2
340	LPA 20:4	Lysophosphatidic acid	C23H39O7P	Guanosine-13C,15N2	-	QYCYIZLSHFMZKV-UHFFFAOYSA-N	20.118	ESI-	[M-H]-	457.236	14.9347	Level 2
341	LPA 20:5	Lysophosphatidic acid	C23H37O7P	Guanosine-13C,15N2	-	DKFJPTBTSHHMCQ-UHFFFAOYSA-N	19.714	ESI-	[M-H]-	455.22	6.98304	Level 2
342	LPA 21:1	Lysophosphatidic acid	C24H47O7P	Guanosine-13C,15N2	-	FEELSAATTLTEKN-UHFFFAOYSA-N	21.435	ESI-	[M-H]-	477.298	4.67032	Level 2
343	LPA 21:3	Lysophosphatidic acid	C24H43O7P	5-Hydroxy-L-tryptophan-d4	-	PJAXDOOAEJYUCI-UHFFFAOYSA-N	21.436	ESI-	[M-H]-	473.267	7.72656	Level 2
344	LPA 21:5	Lysophosphatidic acid	C24H39O7P	Guanosine-13C,15N2	-	RMQZJIYXSCCZSC-UHFFFAOYSA-N	19.716	ESI-	[M-H]-	469.236	6.77184	Level 2
345	LPA 22:6	Lysophosphatidic acid	C25H39O7P	Guanosine-13C,15N2	-	UWHSPTWBPTXYMF-UHFFFAOYSA-N	19.691	ESI-	[M-H]-	481.236	5.6237	Level 2
346	LPA O-16:0	Lysophosphatidic acid	C19H41O6P	CDCA-d4	HMDB0062325	XLVRFPVHQPHXAA-LJQANCHMSA-N	20.63	ESI-	[M-H]-	395.256	9.32815	Level 2
347	LPC 14:0	Lysophosphatidyl choline	C22H46NO7P	LPE 13:0	HMDB0010379	VXUOFDJKYGDUJI-OAQYLSRUSA-N	18.432	ESI+	[M+H]+	468.309	2.82976	Level 2
348	LPC 15:1	Lysophosphatidyl choline	C23H46NO7P	Carnitine C4:0-d3	-	SUCJIOBGMPMVBJ-UHFFFAOYSA-N	3.649	ESI+	[M+H]+	480.309	3.6206	Level 2
349	LPC 16:0	Lysophosphatidyl choline	C24H50NO7P	Cer(d18:1/17:0)	HMDB0010382	ASWBNKHCZGQVJV-HSZRJFAPSA-N	3.386	ESI+	[M+H]+	496.34	19.3047	Level 1
350	LPC 16:1	Lysophosphatidyl choline	C24H48NO7P	LPE 13:0	HMDB0256155	LFUDDCMNKWEORN-UHFFFAOYSA-N	18.711	ESI+	[M+H]+	494.325	3.36226	Level 2
351	LPC 16:2	Lysophosphatidyl choline	C24H46NO7P	LPE 13:0	-	RBYFRQAINZHANG-UHFFFAOYSA-N	18.081	ESI+	[M+H]+	492.309	4.95698	Level 2
352	LPC 16:3	Lysophosphatidyl choline	C24H44NO7P	Cer(d18:1/17:0)	-	MXMRHTIUADTCDH-UHFFFAOYSA-N	3.572	ESI+	[M+H]+	490.293	11.5169	Level 2
353	LPC 17:0	Lysophosphatidyl choline	C25H52NO7P	Carnitine C16:0-d3	-	SRRQPVVYXBTRQK-UHFFFAOYSA-N	19.802	ESI+	[M+H]+	510.356	2.95581	Level 2
354	LPC 17:1	Lysophosphatidyl choline	C25H50NO7P	Carnitine C4:0-d3	-	LPMGFNAQZPADDZ-UHFFFAOYSA-N	19.172	ESI+	[M+H]+	508.34	4.12537	Level 2
355	LPC 17:3	Lysophosphatidyl choline	C25H46NO7P	Carnitine C4:0-d3	-	QUMZFQKSZUXYML-UHFFFAOYSA-N	18.936	ESI+	[M+H]+	504.309	5.26312	Level 2
356	LPC 18:0	Lysophosphatidyl choline	C26H54NO7P	CA-d4	HMDB0010384	IHNKQIMGVNPMTC-RUZDIDTESA-N	20.161	ESI+	[M+H]+	524.372	3.03208	Level 1
357	LPC 18:1	Lysophosphatidyl choline	C26H52NO7P	Carnitine C10:0-d3	HMDB0002815	YAMUFBLWGFFICM-PTGWMXDISA-N	19.576	ESI+	[M+H]+	522.356	3.41218	Level 2
358	LPC 18:2	Lysophosphatidyl choline	C26H50NO7P	FFA 16:0-d3	-	SPJFYYJXNPEZDW-UHFFFAOYSA-N	19.712	ESI-	[M+HCOO]-	564.33	8.75045	Level 2
359	LPC 18:3	Lysophosphatidyl choline	C26H48NO7P	LPE 13:0	-	MRTUWVDDQVMUCR-UHFFFAOYSA-N	18.525	ESI+	[M+H]+	518.325	5.18274	Level 2
360	LPC 19:1	Lysophosphatidyl choline	C27H54NO7P	NT-methylhistidine-d3	-	VRVDEVSSPPTZQJ-UHFFFAOYSA-N	19.939	ESI+	[M+H]+	536.372	5.48665	Level 2
361	LPC 20:0	Lysophosphatidyl choline	C28H58NO7P	NT-methylhistidine-d3	-	UATOAILWGVYRQS-UHFFFAOYSA-N	20.774	ESI+	[M+H]+	552.403	3.47573	Level 2
362	LPC 20:1	Lysophosphatidyl choline	C28H56NO7P	CA-d4	-	YYSFWGQAKJTHRE-UHFFFAOYSA-N	20.267	ESI+	[M+H]+	550.387	1.99998	Level 2
363	LPC 20:4	Lysophosphatidyl choline	C28H50NO7P	NT-methylhistidine-d3	-	GOMVPVRDBLLHQC-UHFFFAOYSA-N	3.383	ESI+	[M+H]+	544.34	22.5767	Level 2
364	LPC 20:5	Lysophosphatidyl choline	C28H48NO7P	4-Hydroxyproline-d3	-	PDIGSOAOQOXRDU-UHFFFAOYSA-N	3.534	ESI+	[M+H]+	542.325	20.1353	Level 2
365	LPC 21:0	Lysophosphatidyl choline	C29H60NO7P	LPE 13:0	-	XZZSYDYWLNENCT-UHFFFAOYSA-N	21.064	ESI+	[M+H]+	566.419	15.9412	Level 2
366	LPC 22:0	Lysophosphatidyl choline	C30H62NO7P	SM d18:1/12:0	-	UIINDYGXBHJQHX-UHFFFAOYSA-N	21.336	ESI+	[M+H]+	580.434	5.26577	Level 2
367	LPC 22:4	Lysophosphatidyl choline	C30H54NO7P	Guanosine-13C,15N2	HMDB0010401	GXEIJYZRCDTJTE-UHFFFAOYSA-N	19.661	ESI+	[M+H]+	572.372	3.96511	Level 2
368	LPC 22:5	Lysophosphatidyl choline	C30H52NO7P	Carnitine C16:0-d3	-	BIEOSECQPGGZMF-UHFFFAOYSA-N	19.241	ESI+	[M+H]+	570.356	7.71494	Level 2
369	LPC 22:6	Lysophosphatidyl choline	C30H50NO7P	Leucine-d3	-	LSOWKZULVQWMLY-UHFFFAOYSA-N	19.345	ESI+	[M+H]+	568.34	3.1101	Level 2
370	LPC 24:0	Lysophosphatidyl choline	C32H66NO7P	SM d18:1/12:0	-	SKJMUADLQLZAGH-UHFFFAOYSA-N	21.932	ESI+	[M+H]+	608.466	2.73463	Level 2
371	LPC O-14:0	Lysophosphatidyl choline	C22H48NO6P	CDCA-d4	-	NJGCXCOQLSTJQC-UHFFFAOYSA-N	18.987	ESI+	[M+H]+	454.33	8.45042	Level 2
372	LPC O-16:0	Lysophosphatidyl choline	C24H52NO6P	CDCA-d4	-	VLBPIWYTPAXCFJ-XMMPIXPASA-N	19.862	ESI+	[M+H]+	482.361	8.65461	Level 1
373	LPC O-17:1	Lysophosphatidyl choline	C25H52NO6P	Tryptophan-d5	-	GUDAIUDDGSMOKK-UHFFFAOYSA-N	19.998	ESI+	[M+H]+	494.361	17.4786	Level 2
374	LPC O-18:0	Lysophosphatidyl choline	C26H56NO6P	CDCA-d4	-	XKBJVQHMEXMFDZ-UHFFFAOYSA-N	20.539	ESI+	[M+H]+	510.392	4.11792	Level 1
375	LPC O-18:1	Lysophosphatidyl choline	C26H54NO6P	Leucine-d3	HMDB0013122	WBOMIOWRFSPZMC-AYICAFKVSA-N	20.432	ESI+	[M+H]+	508.377	5.26152	Level 2
376	LPC O-20:1	Lysophosphatidyl choline	C28H58NO6P	Hippuric acid-d5	-	DTAIPULZERDYCU-UHFFFAOYSA-N	20.619	ESI+	[M+H]+	536.408	21.2793	Level 2
377	LPC O-22:0	Lysophosphatidyl choline	C30H64NO6P	CA-d4	-	MHIOPLSAMAVLPQ-UHFFFAOYSA-N	21.709	ESI+	[M+H]+	566.455	3.44695	Level 2
378	LPC O-22:1	Lysophosphatidyl choline	C30H62NO6P	Leucine-d3	-	XHOAZNLNPVEHPB-UHFFFAOYSA-N	21.176	ESI+	[M+H]+	564.439	14.0408	Level 2
379	LPC O-22:2	Lysophosphatidyl choline	C30H60NO6P	Carnitine C12:0-d3	-	DMANOWMGRBXFCQ-UHFFFAOYSA-N	20.78	ESI+	[M+H]+	562.424	12.5656	Level 2
380	LPC O-24:0	Lysophosphatidyl choline	C32H68NO6P	5-Hydroxy-L-tryptophan-d4	-	YWBUJPLAZHBWTG-UHFFFAOYSA-N	22.324	ESI+	[M+H]+	594.486	4.72918	Level 2
381	LPC O-24:1	Lysophosphatidyl choline	C32H66NO6P	Phenylalanine-d5	-	RBLLXUQXTBAKQS-UHFFFAOYSA-N	21.771	ESI+	[M+H]+	592.471	4.39021	Level 2
382	LPC O-24:3	Lysophosphatidyl choline	C32H62NO6P	Lysine-d4	-	OAONEUBZBPPAOL-UHFFFAOYSA-N	21.2	ESI+	[M+H]+	588.439	13.8876	Level 2
383	LPC O-26:1	Lysophosphatidyl choline	C34H70NO6P	Phenylalanine-d5	-	WSPWCOIMDWODQM-UHFFFAOYSA-N	22.378	ESI+	[M+H]+	620.502	5.99576	Level 2
384	LPE 15:0	Lysophosphatidyl ethanolamine	C20H42NO7P	Tryptophan-d5	-	FGHPDPYCRTXYNZ-UHFFFAOYSA-N	19.399	ESI-	[M-H]-	438.262	12.638	Level 2
385	LPE 16:0	Lysophosphatidyl ethanolamine	C21H44NO7P	LPC 19:0	HMDB0256030	YVYMBNSKXOXSKW-UHFFFAOYSA-N	19.432	ESI+	[M+H]+	454.293	4.53376	Level 2
386	LPE 16:1	Lysophosphatidyl ethanolamine	C21H42NO7P	FFA 18:0-d3	-	DSOWUEHXZJUNID-UHFFFAOYSA-N	19.116	ESI-	[M-H]-	450.262	20.7883	Level 2
387	LPE 18:0	Lysophosphatidyl ethanolamine	C23H48NO7P	Homocystine-d8	HMDB0011130	BBYWOYAFBUOUFP-JOCHJYFZSA-N	20.754	ESI-	[M-H]-	480.309	4.59293	Level 2
388	LPE 18:1	Lysophosphatidyl ethanolamine	C23H46NO7P	FFA 18:0-d3	-	PYVRVRFVLRNJLY-UHFFFAOYSA-N	20.099	ESI-	[M-H]-	478.293	8.03649	Level 2
389	LPE 18:2	Lysophosphatidyl ethanolamine	C23H44NO7P	FFA 18:0-d3	-	DBHKHNGBVGWQJE-UHFFFAOYSA-N	19.503	ESI-	[M-H]-	476.278	7.07235	Level 2
390	LPE 20:3	Lysophosphatidyl ethanolamine	C25H46NO7P	FFA 18:0-d3	-	UEONHLLDVDPRRN-UHFFFAOYSA-N	19.867	ESI-	[M-H]-	502.293	5.67979	Level 2
391	LPE 20:4	Lysophosphatidyl ethanolamine	C25H44NO7P	FFA 18:0-d3	-	JPNPIRVRGLGTRE-UHFFFAOYSA-N	19.47	ESI-	[M-H]-	500.278	9.29235	Level 2
392	LPE 22:5	Lysophosphatidyl ethanolamine	C27H46NO7P	FFA 18:0-d3	-	OSRWIBSZJTWIKA-UHFFFAOYSA-N	19.739	ESI-	[M-H]-	526.293	10.4639	Level 2
393	LPE 22:6	Lysophosphatidyl ethanolamine	C27H44NO7P	LPE 13:0	-	XEVRBOQZSXWGQO-UHFFFAOYSA-N	19.446	ESI-	[M-H]-	524.278	9.38816	Level 2
394	LPE O-16:1	Lysophosphatidyl ethanolamine	C21H44NO6P	4-Hydroxyproline-d3	-	RRTPYUGIBQLEDN-UHFFFAOYSA-N	3.42	ESI+	[M+H]+	438.298	15.4171	Level 2
395	LPE O-18:1	Lysophosphatidyl ethanolamine	C23H48NO6P	Guanosine-13C,15N2	-	CDONWGCJDDHTLP-UHFFFAOYSA-N	3.414	ESI+	[M+H]+	466.33	12.9976	Level 2
396	LPE O-18:2	Lysophosphatidyl ethanolamine	C23H46NO6P	Ornithine-13C5	-	DBVHWKABURKXNY-UHFFFAOYSA-N	20.447	ESI-	[M-H]-	462.298	10.0224	Level 2
397	LPE O-19:1	Lysophosphatidyl ethanolamine	C24H50NO6P	Ornithine-13C5	-	PRBDCEFQVCQKGS-UHFFFAOYSA-N	20.495	ESI-	[M-H]-	478.33	10.0629	Level 2
398	(E)-.alpha.-Santalic acid	Natural Products	C15H22O2	Phe-Trp-13C9,15N	-	NZSCHTYUGUVLHG-WEVVVXLNSA-N	16.599	ESI-	[M-H]-	233.154	4.88941	Level 2
399	1,2,3,19-Tetrahydroxy-12-ursen-28-oic acid	Natural Products	C30H48O6	Hippuric acid-d5	-	VULLSLYDWNGNKZ-WSUAMRMCSA-N	18.481	ESI+	[M+H]+	505.353	11.8211	Level 2
400	11-Keto-beta-boswellic acid	Natural Products	C30H46O4	Homocystine-d8	HMDB0036671	YIMHGPSYDOGBPI-YZCVQEKWSA-N	18.607	ESI+	[M+H]+	471.347	12.2513	Level 2
401	1-Acetylimidazole	Natural Products	C5H6N2O	PE(15:0/15:0)	HMDB0243814	VIHYIVKEECZGOU-UHFFFAOYSA-N	8.366	ESI+	[M+H]+	111.056	4.56639	Level 2
402	1-Methylpiperidine-3-carboxylic acid	Natural Products	C7H13NO2	5-Hydroxy-L-tryptophan-d4	-	AYIXGVABNMIOLK-UHFFFAOYSA-N	6.502	ESI+	[M+H]+	144.102	3.30414	Level 2
403	1-Nitrosopyrrolidine	Natural Products	C4H8N2O	NT-methylhistidine-d3	HMDB0031642	WNYADZVDBIBLJJ-UHFFFAOYSA-N	7.699	ESI+	[M+H]+	101.071	3.36235	Level 2
404	2,6-Di(butan-2-yl)phenol	Natural Products	C14H22O	CA-d4	-	FHTGJZOULSYEOB-UHFFFAOYSA-N	18.296	ESI-	[M-H]-	205.159	3.29005	Level 2
405	2-Methylpyrrolidine	Natural Products	C5H11N	Hippuric acid-d5	-	RGHPCLZJAFCTIK-UHFFFAOYSA-N	4.843	ESI+	[M+H]+	86.097	11.1695	Level 2
406	3',4'-Dimethoxy-.alpha.-naphthoflavone	Natural Products	C21H16O4	Tryptophan-d5	-	QDZQDIUUJDAORK-UHFFFAOYSA-N	7.554	ESI+	[M+H]+	333.113	10.9619	Level 2
407	3-Hydroxy-2',4,4',6'-tetramethoxychalcone	Natural Products	C19H20O6	Homocystine-d8	-	YZUGNKFMDOBYCA-FNORWQNLSA-N	16.371	ESI+	[M+H]+	345.134	4.25255	Level 2
408	4-(4-Hydroxyphenyl)-2-butanone	Natural Products	C10H12O2	CA-d4	HMDB0033723	NJGBTKGETPDVIK-UHFFFAOYSA-N	13.044	ESI-	[M-H]-	163.076	3.80253	Level 2
409	4',5,7-Trihydroxy 3,3',6,8-tetramethoxyflavone	Natural Products	C19H18O9	CDCA-d4	-	DEQJJTUOVGHXHW-UHFFFAOYSA-N	11.742	ESI-	[M-H]-	389.087	6.40234	Level 2
410	4-Isopropenylcyclohexene-1-carboxylic acid	Natural Products	C10H14O2	Glutamic acid-d3	-	CDSMSBUVCWHORP-MRVPVSSYSA-N	12.925	ESI-	[M-H]-	165.092	3.40684	Level 2
411	5-Methoxypsoralen	Natural Products	C12H8O4	Phe-Trp-13C9,15N	HMDB0030637	BGEBZHIAGXMEMV-UHFFFAOYSA-N	4.877	ESI-	[M-H]-	215.034	6.14692	Level 2
412	6-Prenylpinocembrin	Natural Products	C20H20O4	CA-d4	-	UOWOIGNEFLTNAW-KRWDZBQOSA-N	16.081	ESI+	[M+H]+	325.144	2.36943	Level 2
413	aldehydo-D-allose	Natural Products	C6H12O6	5-Hydroxy-L-tryptophan-d4	-	WQZGKKKJIJFFOK-IVMDWMLBSA-N	5.772	ESI-	M-H	179.056	6.15299	Level 1
414	Alloxanthin	Natural Products	C40H52O2	Hippuric acid-d5	HMDB0036874	DVICWXUADSCSLL-DDEWRDOISA-N	20.748	ESI+	[M+H]+	565.405	26.6006	Level 2
415	beta-Ionone	Natural Products	C13H20O	Phenylalanine-d5	HMDB0036565	PSQYTAPXSHCGMF-BQYQJAHWSA-N	14.441	ESI+	[M+H]+	193.159	9.10994	Level 1
416	Bis(2-ethylhexyl) adipate	Natural Products	C22H42O4	SM d18:1/12:0	HMDB0040270	SAOKZLXYCUGLFA-UHFFFAOYSA-N	20.898	ESI+	[M+H]+	371.316	12.6241	Level 2
417	Cannabidiol dimethyl ether	Natural Products	C23H34O2	Hippuric acid-d5	-	UYBGHBAVRNATET-VQTJNVASSA-N	20.921	ESI+	[M+H]+	343.264	17.235	Level 2
418	Cardoltriene	Natural Products	C21H30O2	Hippuric acid-d5	HMDB0038533	OOXBEOHCOCMKAC-UTOQUPLUSA-N	20.289	ESI+	[M+H]+	315.232	18.2759	Level 2
419	Chrysanthemic Acid	Natural Products	C10H16O2	Phe-Trp-13C9,15N	-	XLOPRKKSAJMMEW-UHFFFAOYSA-N	13.236	ESI-	[M-H]-	167.107	3.02329	Level 2
420	Dehydrocurvularin	Natural Products	C16H18O5	Homocystine-d8	-	AVIRMQMUBGNCKS-GQCTYLIASA-N	12.624	ESI-	[M-H]-	289.108	11.5479	Level 2
421	Dihydroplumericinic acid	Natural Products	C14H14O6	SM d18:1/12:0	-	GRJLGDWPUYQSHL-LOJYNRMOSA-N	12.629	ESI+	[M+H]+	279.087	5.22047	Level 2
422	Diosgenin	Natural Products	C27H42O3	Leucine-d3	HMDB0242671	WQLVFSAGQJTQCK-VKROHFNGSA-N	16.959	ESI+	[M+H]+	415.321	6.29099	Level 2
423	Diuron-desdimethyl	Natural Products	C7H6Cl2N2O	CDCA-d4	-	CYESCLHCWJKRKM-UHFFFAOYSA-N	3.382	ESI-	[M-H]-	202.978	6.41137	Level 2
424	Echinenone	Natural Products	C40H54O	Carnitine C4:0-d3	-	QXNWZXMBUKUYMD-QQGJMDNJSA-N	20.748	ESI+	[M+H]+	551.425	5.16563	Level 2
425	epsilon-Decalactone	Natural Products	C10H18O2	NT-methylhistidine-d3	HMDB0033203	YKVIWISPFDZYOW-UHFFFAOYSA-N	20.363	ESI+	[M+H]+	171.139	5.92812	Level 2
426	Euscaphic acid	Natural Products	C30H48O5	Phenylalanine-d5	HMDB0036651	OXVUXGFZHDKYLS-YFIQRXMRSA-N	19.559	ESI+	[M+H]+	489.358	6.34927	Level 2
427	Falcarindiol	Natural Products	C17H24O2	Hippuric acid-d5	HMDB0033941	QWCNQXNAFCBLLV-RCQSYPNMSA-N	20.521	ESI+	[M+H]+	261.185	16.5025	Level 2
428	Foetidin	Natural Products	C20H28O4	Phenylalanine-d5	HMDB0033271	ZAGGYKLVUQTZDW-HIBPSGHXSA-N	16.414	ESI+	[M+H]+	333.207	6.23787	Level 2
429	Friedelin	Natural Products	C30H50O	4-Hydroxyproline-d3	HMDB0252487	OFMXGFHWLZPCFL-OIGNPPFMSA-N	23.029	ESI+	[M+H]+	427.394	25.5545	Level 2
430	Glyceryl palmitate	Natural Products	C19H38O4	5-Hydroxy-L-tryptophan-d4	HMDB0011533	BBNYCLAREVXOSG-UHFFFAOYSA-N	19.938	ESI+	[M+H]+	331.285	3.44199	Level 1
431	Hautriwaic acid	Natural Products	C20H28O4	CDCA-d4	-	PHKSUFCCGLWIMC-UHFFFAOYSA-N	13.617	ESI-	[M-H]-	331.191	4.2347	Level 2
432	HC Toxin	Natural Products	C21H32N4O6	Glutamic acid-d3	-	GNYCTMYOHGBSBI-MKFYTORXSA-N	5.429	ESI+	[M+H]+	437.24	7.90192	Level 2
433	Hirsuteine	Natural Products	C22H26N2O3	Glutamic acid-d3	-	TZUGIFAYWNNSAO-AZQGJTAVSA-N	19.888	ESI+	[M+H]+	367.202	2.98307	Level 2
434	Ilicicolin B	Natural Products	C23H32O3	Hippuric acid-d5	-	QAPOXOGEDXIOHD-VZRGJMDUSA-N	18.904	ESI+	[M+H]+	357.243	14.4871	Level 2
435	Intermedine N-oxide	Natural Products	C15H25NO6	Carnitine C4:0-d3	-	DNAWGBOKUFFVMB-JXSDSIQZSA-N	4.602	ESI+	[M+H]+	316.176	4.69219	Level 2
436	Jasmonic acid	Natural Products	C12H18O3	Carnitine C4:0-d3	HMDB0032797	ZNJFBWYDHIGLCU-HWKXXFMVSA-N	16.112	ESI+	[M+H]+	211.133	11.2673	Level 2
437	Kobusone	Natural Products	C14H22O2	Phenylalanine-d5	HMDB0036790	UETZJEZFLKASPR-UZWIWUQPSA-N	15.628	ESI-	[M-H]-	221.154	9.2454	Level 2
438	Lauryldimethylamine Oxide	Natural Products	C14H31NO	Leucine-d3	-	SYELZBGXAIXKHU-UHFFFAOYSA-N	16.297	ESI+	[M+H]+	230.248	2.65475	Level 2
439	Laurylsulfuric acid	Natural Products	C12H26O4S	FFA 16:0-d3	-	MOTZDAYCYVMXPC-UHFFFAOYSA-N	17.162	ESI-	[M-H]-	265.147	8.46358	Level 2
440	Methyl jasmonate	Natural Products	C13H20O3	4-Hydroxyproline-d3	HMDB0036583	GEWDNTWNSAZUDX-WQMVXFAESA-N	17.172	ESI+	[M+H]+	225.149	10.1076	Level 2
441	Methylxanthoxylin	Natural Products	C11H14O4	Lysine-d4	HMDB0034047	AAOFJKLTRKOQTQ-UHFFFAOYSA-N	13.222	ESI+	[M+H]+	211.097	2.23624	Level 2
442	MG 15:2	Natural Products	C18H32O4	Lysine-d4	-	TYFFWOFQFFPWLL-UHFFFAOYSA-N	18.094	ESI+	[M+NH4]+	330.264	4.64076	Level 2
443	MG 15:3	Natural Products	C18H30O4	Guanosine-13C,15N2	-	PEFPNPOKTMPRRP-UHFFFAOYSA-N	17.59	ESI+	[M+NH4]+	328.249	8.9848	Level 2
444	MG 15:4	Natural Products	C18H28O4	Lysine-d4	-	IYXUSDNWQHIASW-UHFFFAOYSA-N	17.025	ESI+	[M+NH4]+	326.233	15.8695	Level 2
445	MG 16:1	Natural Products	C19H36O4	Carnitine C6:0-d3	HMDB0243951	KVYUBFKSKZWZSV-UHFFFAOYSA-N	19.289	ESI+	[M+NH4]+	346.296	8.13771	Level 2
446	MG 18:1	Natural Products	C21H40O4	Carnitine C16:0-d3	-	RZRNAYUHWVFMIP-KTKRTIGZSA-N	20.059	ESI+	[M+NH4]+	374.327	2.4057	Level 1
447	MG 18:2	Natural Products	C21H38O4	Carnitine C16:0-d3	HMDB0011538	IEPGNWMPIFDNSD-HZJYTTRNSA-N	19.577	ESI+	[M+H]+	355.285	3.78789	Level 2
448	MG 19:3	Natural Products	C22H38O4	Glutamic acid-d3	-	MQEKZCPILDUGKH-UHFFFAOYSA-N	19.131	ESI+	[M+NH4]+	384.311	3.509	Level 2
449	MG 19:4	Natural Products	C22H36O4	Phenylalanine-d5	-	ZBOFXVZANAOQDN-UHFFFAOYSA-N	18.786	ESI+	[M+NH4]+	382.296	4.90862	Level 2
450	MG 20:4	Natural Products	C23H38O4	Glutamic acid-d3	-	LWXLRBPWKGXXED-UHFFFAOYSA-N	19.52	ESI+	[M+NH4]+	396.311	13.6184	Level 2
451	MG 21:4	Natural Products	C24H40O4	Guanosine-13C,15N2	-	ZZQURSDGDMMUNR-UHFFFAOYSA-N	19.623	ESI+	[M+NH4]+	410.327	13.2345	Level 2
452	MG O-20:4	Natural Products	C23H40O3	Hippuric acid-d5	HMDB0013657	CUJUUWXZAQHCNC-DOFZRALJSA-N	21.348	ESI+	[M+H]+	365.306	15.7066	Level 2
453	Monogynol	Natural Products	C20H32O	Hippuric acid-d5	-	CIGQQQTZOIDQQR-SGWMQEFOSA-N	20.923	ESI+	[M+H]+	289.253	17.1895	Level 2
454	Morphine	Natural Products	C17H19NO3	SM d18:1/12:0	HMDB0014440	BQJCRHHNABKAKU-KBQPJGBKSA-N	12.259	ESI+	[M+H]+	286.144	7.15944	Level 2
455	Neogrifolin	Natural Products	C22H32O2	CDCA-d4	HMDB0030053	JWDIUXFSIWOGDP-VZRGJMDUSA-N	20.292	ESI+	[M+H]+	329.248	8.54969	Level 2
456	Phomalone	Natural Products	C13H18O5	Homocystine-d8	-	PTBQWWHUOMDVFS-UHFFFAOYSA-N	14.584	ESI+	[M+H]+	255.123	5.41855	Level 2
457	Quinolactacin B	Natural Products	C15H16N2O2	Ornithine-13C5	-	YCGFIOZHNUQYSK-UHFFFAOYSA-N	12.235	ESI-	[M-H]-	255.113	26.9108	Level 2
458	Roquefortine C	Natural Products	C22H23N5O2	CDCA-d4	-	SPWSUFUPTSJWNG-JJUKSXGLSA-N	13.483	ESI+	[M+H]+	390.193	6.35007	Level 2
459	Scorpion	Natural Products	C7H14N4O3	CDCA-d4	HMDB0244741	YKBZOVFACRVRJN-UHFFFAOYSA-N	7.479	ESI+	[M+H]+	203.114	4.04538	Level 2
460	Senkirkine	Natural Products	C19H27NO6	5-Hydroxy-L-tryptophan-d4	-	HPDHKHMHQGCNPE-QLJRNOHWSA-N	4.33	ESI+	[M+H]+	366.192	2.91463	Level 2
461	Soyasapogenol A	Natural Products	C30H50O4	Leucine-d3	HMDB0034505	CDDWAYFUFNQLRZ-KJVHGCRFSA-N	20.668	ESI+	[M+H]+	475.379	3.65708	Level 2
462	Termitomycamide B	Natural Products	C28H40N2O2	4-Aminobutyric acid-d6	-	KDZGHQVBEWMXHZ-HZJYTTRNSA-N	16.737	ESI+	[M+H]+	437.317	3.22748	Level 2
463	terpestacin	Natural Products	C25H38O4	LPC 19:0	-	UTGBBPSEQPITLF-IXRUDUFRSA-N	19.86	ESI+	[M+H]+	403.285	7.00592	Level 2
464	Tiapride	Natural Products	C15H24N2O4S	Carnitine C16:0-d3	HMDB0042039	JTVPZMFULRWINT-UHFFFAOYSA-N	19.666	ESI+	[M+H]+	329.154	17.7719	Level 2
465	Trihexyphenidyl	Natural Products	C20H31NO	Leucine-d3	HMDB0014520	HWHLPVGTWGOCJO-UHFFFAOYSA-N	19.3	ESI+	[M+H]+	302.248	5.80713	Level 2
466	Valerophenone	Natural Products	C11H14O	CDCA-d4	HMDB0031208	XKGLSKVNOSHTAD-UHFFFAOYSA-N	14.038	ESI+	[M+H]+	163.112	8.13738	Level 2
467	Violaceol-II	Natural Products	C14H14O5	Glutamic acid-d3	-	SXPZFHCIUAADLD-UHFFFAOYSA-N	11.817	ESI-	[M-H]-	261.076	2.84954	Level 2
468	Yohimbic Acid	Natural Products	C20H24N2O3	5-Hydroxy-L-tryptophan-d4	-	AADVZSXPNRLYLV-UHFFFAOYNA-N	20.006	ESI+	[M+H]+	341.187	4.8223	Level 2
469	2-Amino-6-methoxypurine	Nucleotide	C6H7N5O	Leucine-d3	HMDB0245002	BXJHWYVXLGLDMZ-UHFFFAOYSA-N	4.009	ESI+	[M+H]+	166.073	4.42601	Level 2
470	2'-Deoxyuridine 5'-monophosphate	Nucleotide	C9H13N2O8P	CDCA-d4	-	JSRLJPSBLDHEIO-BBVRLYRLSA-N	3.748	ESI-	[M-H]-	307.033	6.69895	Level 2
471	2-Methylguanosine	Nucleotide	C11H15N5O5	NT-methylhistidine-d3	HMDB0005862	SLEHROROQDYRAW-KQYNXXCUSA-N	4.545	ESI+	[M+H]+	298.115	8.27693	Level 1
472	4,6-Diamino-5-formamidopyrimidine	Nucleotide	C5H7N5O	CDCA-d4	HMDB0004816	MVYUVUOSXNYQLL-UHFFFAOYSA-N	4.962	ESI+	[M+H]+	154.073	13.3806	Level 2
473	5-Hydroxymethyl-6-methyluracil	Nucleotide	C6H8N2O3	Lysine-d4	HMDB0000544	XBAVGYMDOXCWQU-UHFFFAOYSA-N	7.25	ESI+	[M+H]+	157.061	12.8958	Level 2
474	5-Methylcytidine	Nucleotide	C10H15N3O5	FFA 16:0-d3	HMDB0000982	ZAYHVCMSTBRABG-JXOAFFINSA-N	7.088	ESI-	[M-H]-	256.093	9.43441	Level 2
475	5-Methylcytosine hydrochloride	Nucleotide	C5H7N3O	Leucine-d3	HMDB0002894	LRSASMSXMSNRBT-UHFFFAOYSA-N	4.323	ESI+	[M+H]+	126.067	3.23867	Level 1
476	Allopurinol	Nucleotide	C5H4N4O	Leucine-d3	HMDB0014581	OFCNXPDARWKPPY-UHFFFAOYSA-N	4.543	ESI+	[M+H]+	137.046	4.69866	Level 2
477	Cytidine	Nucleotide	C9H13N3O5	Phenylalanine-d5	HMDB0000089	UHDGCWIWMRVCDJ-XVFCMESISA-N	4.698	ESI+	[M+H]+	244.093	10.8443	Level 1
478	Guanine	Nucleotide	C5H5N5O	5-Hydroxy-L-tryptophan-d4	HMDB0000132	UYTPUPDQBNUYGX-UHFFFAOYSA-N	4.574	ESI+	[M+H]+	152.057	10.2465	Level 1
479	Guanosine	Nucleotide	C10H13N5O5	Guanosine-13C,15N2	HMDB0000133	NYHBQMYGNKIUIF-UUOKFMHZSA-N	4.866	ESI-	M-H	282.084	6.33521	Level 1
480	Hypoxanthine	Nucleotide	C5H4N4O	Ornithine-13C5	HMDB0000157	FDGQSTZJBFJUBT-UHFFFAOYSA-N	3.865	ESI+	[M+H]+	137.046	1.95643	Level 1
481	Inosine	Nucleotide	C10H12N4O5	Leucine-d3	HMDB0000195	UGQMRVRMYYASKQ-KQYNXXCUSA-N	4.535	ESI+	[M+H]+	269.089	7.0826	Level 1
482	N6-2-(4-Aminophenyl)ethyladenosine	Nucleotide	C18H22N6O4	Leucine-d3	-	XTPOZVLRZZIEBW-SCFUHWHPSA-N	14.703	ESI+	[M+H]+	387.178	2.16659	Level 2
483	Pseudouridine	Nucleotide	C9H12N2O6	Tryptophan-d5	HMDB0000767	PTJWIQPHWPFNBW-GBNDHIKLSA-N	4.698	ESI-	M-H	243.062	7.65712	Level 1
484	Uracil	Nucleotide	C4H4N2O2	CDCA-d4	HMDB0000300	ISAKRJDGNUQOIC-UHFFFAOYSA-N	7.91	ESI-	[M-H]-	111.019	9.9375	Level 2
485	Uridine	Nucleotide	C9H12N2O6	Phe-Trp-13C9,15N	HMDB0000296	DRTQHJPVMGBUCF-XVFCMESISA-N	3.986	ESI-	M-H	243.062	2.9754	Level 1
486	Xanthine	Nucleotide	C5H4N4O2	CDCA-d4	HMDB0000292	LRFVTYWOQMYALW-UHFFFAOYSA-N	4.104	ESI-	M-H	151.026	10.1324	Level 1
487	Xanthosine	Nucleotide	C10H12N4O6	Tryptophan-d5	HMDB0000299	UBORTCNDUKBEOP-UUOKFMHZSA-N	4.68	ESI-	[M-H]-	283.068	12.0137	Level 2
488	Avocadyne 4-acetate	Others	C19H34O4	SM d18:1/12:0	HMDB0031049	FHGZOCAZNHYWAL-UHFFFAOYSA-N	17.621	ESI+	[M+H]+	327.254	5.02867	Level 2
489	Biliverdin	Others	C33H34N4O6	Carnitine C6:0-d3	HMDB0001008	RCNSAJSGRJSBKK-NSQVQWHSSA-N	15.764	ESI+	[M+H]+	583.256	12.0341	Level 1
490	Compound NP-021570	Others	C23H43O7P	Guanosine-13C,15N2	-	RRBISTZDGPMZFF-MURFETPASA-N	20.315	ESI-	[M-H]-	461.267	6.90882	Level 2
491	Dodecalactone	Others	C12H22O2	4-Hydroxyproline-d3	HMDB0037742	QRPLZGZHJABGRS-UHFFFAOYSA-N	20.912	ESI+	[M+H]+	199.17	16.334	Level 2
492	Glycerophosphoric acid	Others	C3H9O6P	Lysine-d4	HMDB0000126	AWUCVROLDVIAJX-GSVOUGTGSA-N	8.173	ESI-	M-H	171.006	19.9429	Level 1
493	Glyceryl Monostearate	Others	C21H42O4	Glutamic acid-d3	HMDB0031075	VBICKXHEKHSIBG-UHFFFAOYSA-N	20.608	ESI+	[M+H]+	359.316	7.03673	Level 2
494	L-Fucose	Others	C6H12O5	Tyrosine-d4	HMDB0000174	SHZGCJCMOBCMKK-DHVFOXMCSA-N	4.879	ESI-	[M-H]-	163.061	5.75518	Level 2
495	LPI 20:4	Others	C29H49O12P	Guanosine-13C,15N2	-	BAWAZBRKENFJED-UHFFFAOYSA-N	18.605	ESI-	[M-H]-	619.288	7.40815	Level 2
496	Methylenediphosphonic acid	Others	CH6O6P2	LPE 13:0	HMDB0254641	MBKDYNNUVRNNRF-UHFFFAOYSA-N	9.307	ESI-	[M-H]-	174.956	23.3272	Level 2
497	Ortophosphate	Others	H3O4P	Glutamic acid-d3	HMDB0001429	NBIIXXVUZAFLBC-UHFFFAOYSA-N	8.512	ESI-	[M-H]-	96.9691	9.54959	Level 2
498	PA 36:2	Others	C39H73O8P	CA-d4	HMDB0007865	MHUWZNTUIIFHAS-DSSVUWSHSA-N	23.89	ESI-	[M-H]-	699.496	4.17176	Level 2
499	PI 28:0	Others	C34H66NO10P	Carnitine C10:0-d3	HMDB0012330	WKJDWDLHIOUPPL-JSOSNVBQSA-N	20.323	ESI+	[M+H]+	680.45	4.8749	Level 2
500	PI 36:2	Others	C45H83O13P	4-Aminobutyric acid-d6	-	MTZOYTZXXAANDJ-UHFFFAOYSA-N	22.702	ESI+	[M+NH4]+	880.591	6.22066	Level 2
501	PI 38:4	Others	C47H83O13P	PE(15:0/15:0)	-	DLTKHZSJDRZTDM-UHFFFAOYSA-N	22.639	ESI+	[M+NH4]+	904.591	6.59803	Level 2
502	Sclerketide D	Others	C17H26O5	Phenylalanine-d5	-	RIQJTEDKQNLJJQ-JXMROGBWSA-N	15.291	ESI+	[M+H]+	311.186	11.6301	Level 2
503	SL 39:7;O2	Others	C39H65NO6S	4-Hydroxyproline-d3	-	XOMNWHCNUIXNDQ-UHFFFAOYSA-N	20.014	ESI+	[M+H]+	676.461	11.398	Level 2
504	SPBP 18:1;O2	Others	C18H38NO5P	5-Hydroxy-L-tryptophan-d4	HMDB0000277	DUYSYHSSBDVJSM-KRWOKUGFSA-N	4.349	ESI+	[M+H]+	380.257	2.67785	Level 2
505	PC 16:0	Phosphatidylcholine	C24H48NO8P	PE(15:0/15:0)	-	YHIXRNNWDBPKPW-UHFFFAOYSA-N	16.874	ESI+	[M+H]+	510.32	9.31257	Level 2
506	PC 18:0	Phosphatidylcholine	C26H52NO8P	LPC 12:0	-	CKGVBFQDYSPMSY-UHFFFAOYSA-N	17.016	ESI+	[M+H]+	538.351	11.6625	Level 2
507	PC 21:1;O	Phosphatidylcholine	C29H56NO9P	LPC 12:0	-	RKIDALSACBQVTN-HHHXNRCGSA-N	19.468	ESI+	[M+H]+	594.377	16.9115	Level 2
508	PC 22:2	Phosphatidylcholine	C30H56NO8P	Guanosine-13C,15N2	-	TZWBLCUXCGLTAJ-UHFFFAOYSA-N	19.843	ESI+	[M+H]+	590.382	6.60143	Level 2
509	PC 30:0	Phosphatidylcholine	C38H76NO8P	Carnitine C16:0-d3	HMDB0007965	UIXXHROAQSBBOV-PSXMRANNSA-N	22.679	ESI+	[M+H]+	706.539	3.00222	Level 2
510	PC 31:0	Phosphatidylcholine	C39H78NO8P	Carnitine C12:0-d3	-	SVEJXXWBDRNQQS-UHFFFAOYSA-N	23.038	ESI+	[M+H]+	720.554	4.2895	Level 2
511	PC 32:0	Phosphatidylcholine	C40H80NO8P	Carnitine C10:0-d3	HMDB0007973	JLPULHDHAOZNQI-ZTIMHPMXSA-N	23.421	ESI+	[M+H]+	734.57	2.75641	Level 1
512	PC 32:1	Phosphatidylcholine	C40H78NO8P	NT-methylhistidine-d3	-	QIBZFHLFHCIUOT-UHFFFAOYSA-N	22.779	ESI+	[M+H]+	732.554	1.87435	Level 2
513	PC 32:2	Phosphatidylcholine	C40H76NO8P	SM d18:1/12:0	-	GPWHCUUIQMGELX-UHFFFAOYSA-N	22.331	ESI+	[M+H]+	730.539	4.31085	Level 2
514	PC 33:0	Phosphatidylcholine	C41H82NO8P	SM d18:1/12:0	-	QPFRMMAJWAWKMU-UHFFFAOYSA-N	23.636	ESI+	[M+H]+	748.586	6.65021	Level 2
515	PC 33:1	Phosphatidylcholine	C41H80NO8P	SM d18:1/12:0	-	RJCXCRUUOOPKIQ-UHFFFAOYSA-N	23.109	ESI+	[M+H]+	746.57	3.7502	Level 2
516	PC 33:2	Phosphatidylcholine	C41H78NO8P	SM d18:1/12:0	-	AIIVRGFXFCHAQG-UHFFFAOYSA-N	22.623	ESI+	[M+H]+	744.554	2.64921	Level 2
517	PC 34:1	Phosphatidylcholine	C42H82NO8P	SM d18:1/12:0	HMDB0007972	WTJKGGKOPKCXLL-VYOBOKEXSA-N	23.505	ESI+	[M+H]+	760.586	2.02987	Level 2
518	PC 34:3	Phosphatidylcholine	C42H78NO8P	Carnitine C16:0-d3	-	QJWDAOSZZYVBJZ-UHFFFAOYSA-N	22.482	ESI+	[M+H]+	756.554	14.3649	Level 2
519	PC 35:1	Phosphatidylcholine	C43H84NO8P	Carnitine C6:0-d3	-	AOWOAAVZHZVSDY-UHFFFAOYSA-N	23.92	ESI+	[M+H]+	774.601	5.62637	Level 2
520	PC 35:4	Phosphatidylcholine	C43H78NO8P	SM d18:1/12:0	-	JSXZJOMDSXRJMT-UHFFFAOYSA-N	22.53	ESI+	[M+H]+	768.554	4.76292	Level 2
521	PC 35:6	Phosphatidylcholine	C43H74NO8P	Carnitine C16:0-d3	-	JMDPPRZTSAKSPB-UHFFFAOYSA-N	22.722	ESI+	[M+H]+	764.523	3.38345	Level 2
522	PC 36:1	Phosphatidylcholine	C44H86NO8P	Phenylalanine-d5	-	MLFOVSVAMJXCMF-UHFFFAOYSA-N	20.068	ESI+	[M+H]+	788.617	20.7176	Level 2
523	PC 36:2	Phosphatidylcholine	C44H84NO8P	4-Aminobutyric acid-d6	-	SNKAWJBJQDLSFF-UHFFFAOYSA-N	3.729	ESI+	[M+H]+	786.601	13.0091	Level 2
524	PC 36:4	Phosphatidylcholine	C44H80NO8P	4-Hydroxyproline-d3	HMDB0244099	FVXDQWZBHIXIEJ-UHFFFAOYSA-N	3.408	ESI+	[M+H]+	782.57	19.5624	Level 2
525	PC 36:6	Phosphatidylcholine	C44H76NO8P	PE(15:0/15:0)	HMDB0008206	XXKFQTJOJZELMD-JICBSJGISA-N	22.151	ESI+	[M+H]+	778.539	8.54821	Level 2
526	PC 36:7	Phosphatidylcholine	C44H74NO8P	LPC 19:0	-	KUUJZWJIEPLPJU-UHFFFAOYSA-N	22.243	ESI+	[M+H]+	776.523	13.8034	Level 2
527	PC 37:1	Phosphatidylcholine	C45H88NO8P	5-Hydroxy-L-tryptophan-d4	-	CGIRUFIVWGLJOM-UHFFFAOYSA-N	21.605	ESI+	[M+H]+	802.633	4.44597	Level 2
528	PC 37:6	Phosphatidylcholine	C45H78NO8P	LPC 19:0	-	SUDSYBFAKREWFT-UHFFFAOYSA-N	22.429	ESI+	[M+H]+	792.554	4.73746	Level 2
529	PC 38:1	Phosphatidylcholine	C46H90NO8P	CA-d4	-	IYLWUQYRLCMSQZ-UHFFFAOYSA-N	22.461	ESI+	[M+H]+	816.648	5.49811	Level 2
530	PC 38:2	Phosphatidylcholine	C46H88NO8P	Guanosine-13C,15N2	-	HJYITXYOCDILBF-UHFFFAOYSA-N	20.953	ESI+	[M+H]+	814.633	19.2598	Level 2
531	PC 38:3	Phosphatidylcholine	C46H86NO8P	SM d18:1/12:0	-	ZDCCXTFOQDDLSE-UHFFFAOYSA-N	23.957	ESI+	[M+H]+	812.617	1.96457	Level 2
532	PC 38:4	Phosphatidylcholine	C46H84NO8P	Carnitine C12:0-d3	-	PSVRFUPOQYJOOZ-RYIOQAQXSA-N	23.589	ESI+	[M+H]+	810.601	13.7477	Level 2
533	PC 38:5	Phosphatidylcholine	C46H82NO8P	CA-d4	-	SWOKEJBWARJLGN-UHFFFAOYSA-N	22.919	ESI+	[M+H]+	808.586	4.82927	Level 2
534	PC 38:6	Phosphatidylcholine	C46H80NO8P	Carnitine C16:0-d3	HMDB0007991	IESVDEZGAHUQJU-ZLBXKVHBSA-N	22.711	ESI+	[M+H]+	806.57	3.06812	Level 2
535	PC 38:7	Phosphatidylcholine	C46H78NO8P	CDCA-d4	-	HRBNRYBXXRPMKP-UHFFFAOYSA-N	22.562	ESI+	[M+H]+	804.554	10.656	Level 2
536	PC 39:4	Phosphatidylcholine	C47H86NO8P	SM d18:1/12:0	-	ZLTVVCQUMDBMTQ-UHFFFAOYSA-N	23.142	ESI+	[M+H]+	824.617	11.985	Level 2
537	PC 39:5	Phosphatidylcholine	C47H84NO8P	SM d18:1/12:0	-	GPGSUKHQCYPANR-UHFFFAOYSA-N	22.702	ESI+	[M+H]+	822.601	4.14374	Level 2
538	PC 39:6	Phosphatidylcholine	C47H82NO8P	Ornithine-13C5	-	IDPNMQGEQTYXLJ-UHFFFAOYSA-N	23.046	ESI+	[M+H]+	820.586	3.22312	Level 2
539	PC 40:4	Phosphatidylcholine	C48H88NO8P	Leucine-d3	-	AAYOXXRTLLISDA-UHFFFAOYSA-N	20.606	ESI+	[M+H]+	838.633	9.44886	Level 2
540	PC 40:5	Phosphatidylcholine	C48H86NO8P	4-Hydroxyproline-d3	-	MNLODOXUTCKZPS-UHFFFAOYSA-N	23.69	ESI+	[M+H]+	836.617	11.1201	Level 2
541	PC 40:6	Phosphatidylcholine	C48H84NO8P	PE(15:0/15:0)	HMDB0008057	FAUYAENFVCNTAL-PFFNLMTBSA-N	23.05	ESI+	[M+H]+	834.601	10.1762	Level 2
542	PC 40:8	Phosphatidylcholine	C48H80NO8P	Carnitine C10:0-d3	-	BFCSBEFTXQRIOJ-UHFFFAOYSA-N	22.37	ESI+	[M+H]+	830.57	5.215	Level 2
543	PC 40:9	Phosphatidylcholine	C48H78NO8P	CA-d4	-	NUTLWPWRGPVRPB-UHFFFAOYSA-N	22.054	ESI+	[M+H]+	828.554	19.0009	Level 2
544	PC 42:10	Phosphatidylcholine	C50H80NO8P	LPC 19:0	-	OBNXHNMPWZNZOE-UHFFFAOYSA-N	22.27	ESI+	[M+H]+	854.57	5.12233	Level 2
545	PC 42:11	Phosphatidylcholine	C50H78NO8P	Carnitine C6:0-d3	-	FXDQJBSGJDJBNI-UHFFFAOYSA-N	22.37	ESI+	[M+H]+	852.554	19.037	Level 2
546	PC 42:7	Phosphatidylcholine	C50H86NO8P	Carnitine C16:0-d3	-	GRJUORGBTABXCX-UHFFFAOYSA-N	23.154	ESI+	[M+H]+	860.617	23.5032	Level 2
547	PC 42:8	Phosphatidylcholine	C50H84NO8P	Carnitine C4:0-d3	-	CBZKQAMOIDIGQS-UHFFFAOYSA-N	22.872	ESI+	[M+H]+	858.601	12.3241	Level 2
548	PC 42:9	Phosphatidylcholine	C50H82NO8P	Tryptophan-d5	-	LDYGTUXBIPSXMN-UHFFFAOYSA-N	22.486	ESI+	[M+H]+	856.586	10.7254	Level 2
549	PC 44:12	Phosphatidylcholine	C52H80NO8P	LPE 13:0	HMDB0008748	XLKQWAMTMYIQMG-SVUPRYTISA-N	22.208	ESI+	[M+H]+	878.57	27.8426	Level 2
550	PC O-30:0	Phosphatidylcholine	C38H78NO7P	PE(15:0/15:0)	-	QWXGXDFYLSOKRF-UHFFFAOYSA-N	23.111	ESI+	[M+H]+	692.559	6.35692	Level 2
551	PC O-32:0	Phosphatidylcholine	C40H82NO7P	Carnitine C16:0-d3	-	AXEPEEXNGOBZFB-UHFFFAOYSA-N	23.949	ESI+	[M+H]+	720.591	2.98213	Level 2
552	PC O-32:1	Phosphatidylcholine	C40H80NO7P	Carnitine C16:0-d3	-	BXQUYBIIGCTQFV-UHFFFAOYSA-N	23.795	ESI+	[M+H]+	718.575	2.70298	Level 2
553	PC O-32:2	Phosphatidylcholine	C40H78NO7P	LPC 19:0	-	WSADSIWKXDGULT-UHFFFAOYSA-N	22.688	ESI+	[M+H]+	716.559	9.58543	Level 2
554	PC O-32:4	Phosphatidylcholine	C40H74NO7P	Tryptophan-d5	-	NVKREVMRJDOZFL-UHFFFAOYSA-N	22.952	ESI+	[M+H]+	712.528	8.71451	Level 2
555	PC O-34:0	Phosphatidylcholine	C42H86NO7P	CDCA-d4	-	BNIFFRNYMGLGIV-UHFFFAOYSA-N	21.693	ESI+	[M+H]+	748.622	2.64027	Level 2
556	PC O-34:2	Phosphatidylcholine	C42H82NO7P	SM d18:1/12:0	-	WDQJCKHLEYAETE-UHFFFAOYSA-N	23.87	ESI+	[M+H]+	744.591	2.24599	Level 2
557	PC O-34:3	Phosphatidylcholine	C42H80NO7P	Carnitine C16:0-d3	-	AXCLECQLCBWNLZ-UHFFFAOYSA-N	23.249	ESI+	[M+H]+	742.575	3.66656	Level 2
558	PC O-34:4	Phosphatidylcholine	C42H78NO7P	SM d18:1/12:0	-	KNHXCLGABLNNRN-UHFFFAOYSA-N	22.624	ESI+	[M+H]+	740.559	3.23262	Level 2
559	PC O-35:4	Phosphatidylcholine	C43H80NO7P	5-Hydroxy-L-tryptophan-d4	-	XVLYBECFLHBCTE-UHFFFAOYSA-N	22.947	ESI+	[M+H]+	754.575	1.76531	Level 2
560	PC O-35:8	Phosphatidylcholine	C43H72NO7P	SM d18:1/12:0	-	VKADWDKHGSYFGT-UHFFFAOYSA-N	23.144	ESI+	[M+H]+	746.512	5.11354	Level 2
561	PC O-36:1	Phosphatidylcholine	C44H88NO7P	Leucine-d3	-	NNHLCCQIVVAXQH-UHFFFAOYSA-N	21.899	ESI+	[M+H]+	774.638	3.47355	Level 2
562	PC O-36:2	Phosphatidylcholine	C44H86NO7P	NT-methylhistidine-d3	HMDB0011243	DSWOVBIRJNAJAF-NVJOKYTBSA-N	21.495	ESI+	[M+H]+	772.622	3.0118	Level 2
563	PC O-36:3	Phosphatidylcholine	C44H84NO7P	NT-methylhistidine-d3	-	VYKSGWCIVDQIQR-GBDFTIALSA-N	23.489	ESI+	[M+H]+	770.606	8.95383	Level 2
564	PC O-36:4	Phosphatidylcholine	C44H82NO7P	SM d18:1/12:0	-	SOUZQPFUXRVDGK-UHFFFAOYSA-N	23.289	ESI+	[M+H]+	768.591	10.0535	Level 2
565	PC O-36:5	Phosphatidylcholine	C44H80NO7P	4-Aminobutyric acid-d6	-	UIGATZALONHOIA-UHFFFAOYSA-N	22.837	ESI+	[M+H]+	766.575	4.13723	Level 2
566	PC O-37:8	Phosphatidylcholine	C45H76NO7P	Carnitine C10:0-d3	-	VGUMSKASUULNIF-UHFFFAOYSA-N	23.946	ESI+	[M+H]+	774.544	8.1451	Level 2
567	PC O-38:2	Phosphatidylcholine	C46H90NO7P	CA-d4	-	JWRYETUBUQGCJU-UHFFFAOYSA-N	22.311	ESI+	[M+H]+	800.653	2.5731	Level 2
568	PC O-38:3	Phosphatidylcholine	C46H88NO7P	Leucine-d3	-	JQEOVXRIBKQIGX-UHFFFAOYSA-N	20.907	ESI+	[M+H]+	798.638	5.22951	Level 2
569	PC O-38:5	Phosphatidylcholine	C46H84NO7P	Lysine-d4	-	FIXXHFHMLLXEGQ-UHFFFAOYSA-N	23.371	ESI+	[M+H]+	794.606	10.6199	Level 2
570	PC O-38:6	Phosphatidylcholine	C46H82NO7P	Tryptophan-d5	-	LYVCXQZOQYYLAM-UHFFFAOYSA-N	23.174	ESI+	[M+H]+	792.591	14.5793	Level 2
571	PC O-38:7	Phosphatidylcholine	C46H80NO7P	4-Aminobutyric acid-d6	-	JCCNGTCWHNMGQR-UHFFFAOYSA-N	22.998	ESI+	[M+H]+	790.575	9.36429	Level 2
572	PC O-38:8	Phosphatidylcholine	C46H78NO7P	CA-d4	-	FCNCLGVQZFEHST-UHFFFAOYSA-N	23.124	ESI+	[M+H]+	788.559	2.3978	Level 2
573	PC O-39:7	Phosphatidylcholine	C47H82NO7P	Lysine-d4	-	UGYDPWVJBQSUKJ-UHFFFAOYSA-N	22.922	ESI+	[M+H]+	804.591	7.5497	Level 2
574	PC O-40:3	Phosphatidylcholine	C48H92NO7P	SM d18:1/12:0	-	ODBXEJFUFNZVOB-UHFFFAOYSA-N	22.424	ESI+	[M+H]+	826.669	4.17259	Level 2
575	PC O-40:4	Phosphatidylcholine	C48H90NO7P	CDCA-d4	-	PCRPQEYUJVWWPG-UHFFFAOYSA-N	21.658	ESI+	[M+H]+	824.653	5.09735	Level 2
576	PC O-40:5	Phosphatidylcholine	C48H88NO7P	Tryptophan-d5	-	GZYCUOIGRDDFMV-UHFFFAOYSA-N	3.436	ESI+	[M+H]+	822.638	12.7887	Level 2
577	PC O-40:6	Phosphatidylcholine	C48H86NO7P	4-Aminobutyric acid-d6	-	WKQRDJBOIJKXHO-UHFFFAOYSA-N	23.935	ESI+	[M+H]+	820.622	8.11364	Level 2
578	PC O-40:7	Phosphatidylcholine	C48H84NO7P	NT-methylhistidine-d3	-	MWJZGUPJPKCTCF-UHFFFAOYSA-N	23.746	ESI+	[M+H]+	818.606	5.5937	Level 2
579	PC O-40:8	Phosphatidylcholine	C48H82NO7P	Phenylalanine-d5	-	DOVXXELSLKWDHQ-UHFFFAOYSA-N	23.926	ESI+	[M+H]+	816.591	11.4377	Level 2
580	PC O-41:11	Phosphatidylcholine	C49H78NO7P	Taurine-d4	-	POUGFOMGZOSCQV-UHFFFAOYSA-N	23.73	ESI+	[M+H]+	824.559	9.49168	Level 2
581	PC O-41:5	Phosphatidylcholine	C49H90NO7P	Carnitine C6:0-d3	-	WPWKOMFMJBCINR-UHFFFAOYSA-N	4.791	ESI+	[M+H]+	836.653	15.938	Level 2
582	PC O-42:10	Phosphatidylcholine	C50H82NO7P	Lysine-d4	-	XCKJHMYCWZRGKW-UHFFFAOYSA-N	23.198	ESI+	[M+H]+	840.591	12.7052	Level 2
583	PC O-42:4	Phosphatidylcholine	C50H94NO7P	PE(15:0/15:0)	-	XDZZLVDLFBXEDN-UHFFFAOYSA-N	22.711	ESI+	[M+H]+	852.685	3.50326	Level 2
584	PC O-42:5	Phosphatidylcholine	C50H92NO7P	Tryptophan-d5	-	FOEMWXLFCHTQNO-UHFFFAOYSA-N	22.184	ESI+	[M+H]+	850.669	12.3981	Level 2
585	PC O-42:6	Phosphatidylcholine	C50H90NO7P	CDCA-d4	-	WXFQFAJYOCYNEF-UHFFFAOYSA-N	21.75	ESI+	[M+H]+	848.653	2.64027	Level 2
586	PC O-42:8	Phosphatidylcholine	C50H86NO7P	SM d18:1/12:0	-	MDZQMESSHROBQA-UHFFFAOYSA-N	23.362	ESI+	[M+H]+	844.622	4.87119	Level 2
587	PC O-42:9	Phosphatidylcholine	C50H84NO7P	4-Hydroxyproline-d3	-	CIKLTOCCZGXOIB-UHFFFAOYSA-N	23.935	ESI+	[M+H]+	842.606	11.3223	Level 2
588	PC O-44:5	Phosphatidylcholine	C52H96NO7P	CDCA-d4	-	JODINCHYVSXVOQ-UHFFFAOYSA-N	23.807	ESI+	[M+H]+	878.7	7.15546	Level 2
589	PC O-44:6	Phosphatidylcholine	C52H94NO7P	CA-d4	-	CLYDZGGLHUPGKJ-UHFFFAOYSA-N	22.48	ESI+	[M+H]+	876.685	6.60894	Level 2
590	PC O-44:7	Phosphatidylcholine	C52H92NO7P	CDCA-d4	-	MSSPRGTZNMIKFE-UHFFFAOYSA-N	21.812	ESI+	[M+H]+	874.669	2.87472	Level 2
591	PC O-46:7	Phosphatidylcholine	C54H96NO7P	Glutamic acid-d3	-	MBAJFQTZPXJMMK-UHFFFAOYSA-N	23.432	ESI+	[M+H]+	902.7	4.18044	Level 2
592	PC O-46:8	Phosphatidylcholine	C54H94NO7P	Lysine-d4	-	GMGNPKXMWFEKLG-UHFFFAOYSA-N	22.147	ESI+	[M+H]+	900.685	3.05757	Level 2
593	PE 34:1	Phosphatidylethanolamine	C39H76NO8P	Carnitine C16:0-d3	-	FHQVHHIBKUMWTI-UHFFFAOYSA-N	23.516	ESI+	[M+H]+	718.539	13.5215	Level 2
594	PE 34:2	Phosphatidylethanolamine	C39H74NO8P	Carnitine C4:0-d3	-	HBZNVZIRJWODIB-UHFFFAOYSA-N	22.962	ESI+	[M+H]+	716.523	12.6133	Level 2
595	PE 36:2	Phosphatidylethanolamine	C41H78NO8P	4-Hydroxyproline-d3	-	YDTWOEYVDRKKCR-UHFFFAOYSA-N	23.733	ESI+	[M+H]+	744.554	10.5578	Level 2
596	PE 36:3	Phosphatidylethanolamine	C41H76NO8P	Guanosine-13C,15N2	-	GKAFCSRKMWFPSJ-UHFFFAOYSA-N	23.017	ESI+	[M+H]+	742.539	9.98875	Level 2
597	PE 36:4	Phosphatidylethanolamine	C41H74NO8P	NT-methylhistidine-d3	-	NQIMLWFRWGTTOZ-UHFFFAOYSA-N	22.844	ESI+	[M+H]+	740.523	4.34416	Level 2
598	PE 38:4	Phosphatidylethanolamine	C43H78NO8P	Carnitine C16:0-d3	-	WQJMXPBPUFDDJK-UHFFFAOYSA-N	23.601	ESI+	[M+H]+	768.554	10.9051	Level 2
599	PE O-34:2	Phosphatidylethanolamine	C39H76NO7P	PE(15:0/15:0)	-	ZVVYJAAMWXATNY-UHFFFAOYSA-N	23.892	ESI+	[M+H]+	702.544	10.8348	Level 2
600	PE O-34:3	Phosphatidylethanolamine	C39H74NO7P	CA-d4	-	LJVXDBWIBQQKFU-UHFFFAOYSA-N	23.271	ESI+	[M+H]+	700.528	6.76368	Level 2
601	PE O-36:4	Phosphatidylethanolamine	C41H76NO7P	Carnitine C16:0-d3	-	ULUBTSXVFBWWEF-UHFFFAOYSA-N	23.349	ESI+	[M+H]+	726.544	7.94766	Level 2
602	PE O-37:5	Phosphatidylethanolamine	C42H76NO7P	Taurine-d4	-	SUCZWPZZJOWHRI-UHFFFAOYSA-N	23.541	ESI+	[M+H]+	738.544	15.6821	Level 2
603	PE O-38:6	Phosphatidylethanolamine	C43H76NO7P	Carnitine C10:0-d3	-	UIOPUEZHKHUYIV-UHFFFAOYSA-N	23.217	ESI+	[M+H]+	750.544	7.92752	Level 2
604	PE O-38:7	Phosphatidylethanolamine	C43H74NO7P	CDCA-d4	-	WVGALBKSWOUIEZ-UHFFFAOYSA-N	23.011	ESI+	[M+H]+	748.528	13.9831	Level 2
605	PE O-40:7	Phosphatidylethanolamine	C45H78NO7P	Carnitine C16:0-d3	-	FIJFPUAJUDAZEY-UHFFFAOYSA-N	23.773	ESI+	[M+H]+	776.559	3.19046	Level 2
606	PE O-40:8	Phosphatidylethanolamine	C45H76NO7P	SM d18:1/12:0	-	UKPNUUDYLNCIOE-UHFFFAOYSA-N	23.089	ESI+	[M+H]+	774.544	6.21046	Level 2
607	Arg-Glu	Peptide	C11H21N5O5	CDCA-d4	HMDB0028708	HFKJBCPRWWGPEY-RQJHMYQMSA-N	8.954	ESI-	[M-H]-	302.146	4.35665	Level 2
608	Arg-Lys	Peptide	C12H26N6O3	Ornithine-13C5	HMDB0028714	JQFZHHSQMKZLRU-RKDXNWHRSA-N	15.633	ESI+	[M+H]+	303.214	2.28241	Level 2
609	Asn-Arg	Peptide	C10H20N6O4	Guanosine-13C,15N2	HMDB0028725	NPDLYUOYAGBHFB-RITPCOANSA-N	8.763	ESI+	[M+H]+	289.162	4.65963	Level 2
610	Asn-Val-Arg	Peptide	C15H29N7O5	Glutamic acid-d3	-	XLDMSQYOYXINSZ-UHFFFAOYSA-N	8.425	ESI+	[M+H]+	388.231	4.76234	Level 2
611	Asp-Gln	Peptide	C9H15N3O6	FFA 16:0-d3	HMDB0028751	GSMPSRPMQQDRIB-CRCLSJGQSA-N	8.561	ESI-	[M-H]-	260.088	13.0852	Level 2
612	Asp-Leu	Peptide	C10H18N2O5	4-Hydroxyproline-d3	HMDB0028757	ZVDPYSVOZFINEE-RQJHMYQMSA-N	7.767	ESI-	[M-H]-	245.114	5.8407	Level 2
613	Asp-Phe	Peptide	C13H16N2O5	CA-d4	HMDB0000706	YZQCXOFQZKCETR-UWVGGRQHSA-N	7.476	ESI+	[M+H]+	281.114	2.47205	Level 1
614	gamma-Glutamylglutamine	Peptide	C10H17N3O6	Carnitine C16:0-d3	HMDB0011738	JBFYFLXEJFQWMU-WDSKDSINSA-N	8.62	ESI+	[M+H]+	276.12	9.22633	Level 2
615	Glu-Arg	Peptide	C11H21N5O5	Glutamic acid-d3	HMDB0028813	MPZWMIIOPAPAKE-RQJHMYQMSA-N	8.765	ESI+	[M+H]+	304.162	2.99506	Level 2
616	Glu-Asp	Peptide	C9H14N2O7	Lysine-d4	HMDB0028815	FYYSIASRLDJUNP-WHFBIAKZSA-N	14.585	ESI+	[M+H]+	263.088	2.537	Level 2
617	Glu-Gln	Peptide	C10H17N3O6	Homocystine-d8	HMDB0028817	MGHKSHCBDXNTHX-UHFFFAOYSA-N	8.775	ESI-	[M-H]-	274.104	6.12973	Level 2
618	Glu-Glu	Peptide	C10H16N2O7	Phe-Trp-13C9,15N	HMDB0028818	KOSRFJWDECSPRO-WDSKDSINSA-N	8.542	ESI-	M-H	275.088	5.71875	Level 1
619	Glu-Gly	Peptide	C7H12N2O5	Homocystine-d8	HMDB0028819	LSPKYLAFTPBWIL-BYPYZUCNSA-N	8.459	ESI-	[M-H]-	203.067	4.23095	Level 2
620	Glu-Leu	Peptide	C11H20N2O5	4-Hydroxyproline-d3	HMDB0011171	MYFMARDICOWMQP-YUMQZZPRSA-N	7.335	ESI+	[M+H]+	261.145	6.88189	Level 1
621	Glu-Thr	Peptide	C9H16N2O6	Tryptophan-d5	HMDB0028829	JSIQVRIXMINMTA-ZDLURKLDSA-N	8.62	ESI-	M-H	247.093	8.84049	Level 1
622	Glu-Tyr	Peptide	C14H18N2O6	FFA 16:0-d3	HMDB0028831	YSWHPLCDIMUKFE-UHFFFAOYSA-N	7.738	ESI-	[M-H]-	309.109	19.457	Level 2
623	Gly-Gly-Val	Peptide	C9H17N3O4	FFA 16:0-d3	-	OLPPXYMMIARYAL-QMMMGPOBSA-N	7.505	ESI-	[M-H]-	230.114	11.3665	Level 2
624	Gly-Lys	Peptide	C8H17N3O3	CDCA-d4	HMDB0028846	IKAIKUBBJHFNBZ-LURJTMIESA-N	8.8	ESI-	[M-H]-	202.119	3.35384	Level 2
625	Gly-Phe	Peptide	C11H14N2O3	Tryptophan-d5	HMDB0028848	JBCLFWXMTIKCCB-VIFPVBQESA-N	6.567	ESI-	M-H	221.093	7.56072	Level 1
626	Gly-Val	Peptide	C7H14N2O3	Glutamic acid-d3	HMDB0028854	STKYPAFSDFAEPH-LURJTMIESA-N	6.975	ESI-	M-H	173.093	11.7075	Level 1
627	His-Gly	Peptide	C8H12N4O3	Ornithine-13C5	HMDB0028885	LYCVKHSJGDMDLM-LURJTMIESA-N	8.704	ESI-	[M-H]-	211.083	17.2207	Level 2
628	His-Phe	Peptide	C15H18N4O3	Lysine-d4	HMDB0028892	XMAUFHMAAVTODF-STQMWFEESA-N	7.161	ESI+	[M+H]+	303.146	3.72448	Level 2
629	Ile-Ile	Peptide	C12H24N2O3	CA-d4	HMDB0028910	BCVIOZZGJNOEQS-AXTSPUMRSA-N	4.055	ESI-	[M-H]-	243.171	3.57488	Level 2
630	Ile-Val	Peptide	C11H22N2O3	Homocystine-d8	HMDB0028920	BCXBIONYYJCSDF-CIUDSAMLSA-N	4.439	ESI-	[M-H]-	229.155	7.21591	Level 2
631	Leu-Ala	Peptide	C9H18N2O3	Leucine-d3	HMDB0028922	HSQGMTRYSIHDAC-BQBZGAKWSA-N	4.856	ESI+	[M+H]+	203.14	2.86356	Level 2
632	Lys-Gln	Peptide	C11H22N4O4	Leucine-d3	HMDB0028949	OAPNERBWQWUPTI-YUMQZZPRSA-N	8.77	ESI+	[M+H]+	275.172	5.82329	Level 2
633	Lys-Ile	Peptide	C12H25N3O3	Lysine-d4	HMDB0028954	FMIIKPHLJKUXGE-GUBZILKMSA-N	8.165	ESI+	[M+H]+	260.197	3.7174	Level 2
634	Phe-Leu	Peptide	C15H22N2O3	5-Hydroxy-L-tryptophan-d4	HMDB0253025	RFCVXVPWSPOMFJ-STQMWFEESA-N	3.948	ESI-	[M-H]-	277.155	4.80725	Level 2
635	Phe-Phe	Peptide	C18H20N2O3	Guanosine-13C,15N2	HMDB0013302	GKZIWHRNKRBEOH-HOTGVXAUSA-N	4.033	ESI+	[M+H]+	313.155	5.02876	Level 1
636	Phe-Ser	Peptide	C12H16N2O4	4-Aminobutyric acid-d6	HMDB0029004	ROHDXJUFQVRDAV-UWVGGRQHSA-N	6.88	ESI+	[M+H]+	253.119	2.46386	Level 2
637	Phe-Trp	Peptide	C20H21N3O3	5-Hydroxy-L-tryptophan-d4	HMDB0029006	JMCOUWKXLXDERB-WMZOPIPTSA-N	4.029	ESI+	[M+H]+	352.166	3.18109	Level 1
638	Pro-Hyp	Peptide	C10H16N2O4	Carnitine C10:0-d3	HMDB0006695	ONPXCLZMBSJLSP-CSMHCCOUSA-N	7.665	ESI+	[M+H]+	229.119	2.67443	Level 2
639	Pro-Leu	Peptide	C11H20N2O3	CA-d4	HMDB0253028	ZKQOUHVVXABNDG-IUCAKERBSA-N	4.928	ESI+	[M+H]+	229.155	2.45893	Level 2
640	Pro-Leu-Lys	Peptide	C17H32N4O4	CDCA-d4	-	MRYUJHGPZQNOAD-UHFFFAOYSA-N	8.28	ESI+	[M+H]+	357.25	2.29507	Level 2
641	Ser-Ala	Peptide	C6H12N2O4	CA-d4	HMDB0029032	SSJMZMUVNKEENT-IMJSIDKUSA-N	7.962	ESI+	[M+H]+	177.088	2.15564	Level 2
642	Ser-Asn	Peptide	C7H13N3O5	CDCA-d4	HMDB0029034	LTFSLKWFMWZEBD-DMTCNVIQSA-N	8.685	ESI-	[M-H]-	218.078	4.21728	Level 2
643	Ser-Glu	Peptide	C8H14N2O6	Phenylalanine-d5	HMDB0029038	LAFKUZYWNCHOHT-UHNVWZDZSA-N	8.768	ESI-	[M-H]-	233.077	6.13797	Level 2
644	Ser-His	Peptide	C9H14N4O4	Phe-Trp-13C9,15N	HMDB0029041	YZMPDHTZJJCGEI-RNFRBKRXSA-N	8.672	ESI-	[M-H]-	241.094	7.77854	Level 2
645	tert-butyl 2-(5-chloro-2,2'-dioxospiro[indole-3,3'-pyrrolidine]-1-yl)acetate	Peptide	C17H19ClN2O4	PE(15:0/15:0)	-	FXDFCQKNBUKFLH-UHFFFAOYSA-N	4.067	ESI+	[M+H]+	351.111	18.9922	Level 2
646	Thr-Phe	Peptide	C13H18N2O4	Tryptophan-d5	HMDB0029068	IQHUITKNHOKGFC-IEBDPFPHSA-N	4.888	ESI-	[M-H]-	265.119	15.5801	Level 2
647	Thr-Ser	Peptide	C7H14N2O5	Glutamic acid-d3	HMDB0029070	GXDLGHLJTHMDII-WISUUJSJSA-N	8.359	ESI-	[M-H]-	205.082	5.42367	Level 2
648	Val-Arg	Peptide	C11H23N5O3	Ornithine-13C5	HMDB0029121	IBIDRSSEHFLGSD-JGVFFNPUSA-N	8.317	ESI+	[M+H]+	274.188	2.75172	Level 2
649	Val-Glu	Peptide	C10H18N2O5	Carnitine C10:0-d3	HMDB0029126	UPJONISHZRADBH-POYBYMJQSA-N	7.693	ESI+	[M+H]+	247.129	2.55441	Level 2
650	LSM 18:1;O2	Sphingomyelin	C23H49N2O5P	Glutamic acid-d3	-	JLVSPVFPBBFMBE-HXSWCURESA-N	4.554	ESI+	[M+H]+	465.346	9.17611	Level 2
651	SM 20:0;O2	Sphingomyelin	C25H53N2O6P	Phenylalanine-d5	-	UGGZHKANHUYCLX-UHFFFAOYSA-N	17.9	ESI+	[M+H]+	509.372	14.5918	Level 2
652	SM 32:0;O2	Sphingomyelin	C37H77N2O6P	Carnitine C12:0-d3	-	MCCRWVNDSLPCEX-UHFFFAOYSA-N	22.319	ESI+	[M+H]+	677.56	3.64559	Level 2
653	SM 32:1;O2	Sphingomyelin	C37H75N2O6P	Carnitine C16:0-d3	-	PNAFCZHSFGCPBV-UHFFFAOYSA-N	22.079	ESI+	[M+H]+	675.544	2.66817	Level 2
654	SM 32:2;O2	Sphingomyelin	C37H73N2O6P	CA-d4	-	AZMHJTIGIHIMFP-UHFFFAOYSA-N	21.586	ESI+	[M+H]+	673.528	2.43966	Level 2
655	SM 33:0;O2	Sphingomyelin	C38H79N2O6P	Tyrosine-d4	-	XURYNFSMVPDSFV-UHFFFAOYSA-N	22.629	ESI+	[M+H]+	691.575	7.62324	Level 2
656	SM 33:1;O2	Sphingomyelin	C38H77N2O6P	Carnitine C12:0-d3	-	REEYJRIAQSUMNO-UHFFFAOYSA-N	22.376	ESI+	[M+H]+	689.56	3.60741	Level 2
657	SM 34:0;O2	Sphingomyelin	C39H81N2O6P	Carnitine C6:0-d3	-	JIOJUELCHJZSCJ-UHFFFAOYSA-N	22.987	ESI+	[M+H]+	705.591	9.14675	Level 2
658	SM 34:1;O2	Sphingomyelin	C39H79N2O6P	Carnitine C6:0-d3	-	RWKUXQNLWDTSLO-UHFFFAOYSA-N	22.678	ESI+	[M+H]+	703.575	2.55787	Level 2
659	SM 34:2;O2	Sphingomyelin	C39H77N2O7P	Carnitine C6:0-d3	-	SZEJSYWBKCTVOG-UHFFFAOYSA-N	21.956	ESI+	[M+H]+	717.555	23.7018	Level 2
660	SM 34:3;O2	Sphingomyelin	C39H75N2O6P	Carnitine C6:0-d3	-	QKWVPBJYICKMMJ-UHFFFAOYSA-N	22.32	ESI+	[M+H]+	699.544	9.9267	Level 2
661	SM 35:1;O2	Sphingomyelin	C40H81N2O6P	SM d18:1/12:0	-	ASVIEZNRHGUMIU-UHFFFAOYSA-N	23.035	ESI+	[M+H]+	717.591	4.66154	Level 2
662	SM 35:2;O2	Sphingomyelin	C40H79N2O6P	Carnitine C4:0-d3	-	WZMKFWKRGIXMGA-UHFFFAOYSA-N	22.472	ESI+	[M+H]+	715.575	12.2041	Level 2
663	SM 36:0;O2	Sphingomyelin	C41H85N2O6P	Carnitine C12:0-d3	-	HHUPDMAQIBSEGQ-UHFFFAOYSA-N	23.787	ESI+	[M+H]+	733.622	7.29896	Level 2
664	SM 36:1;O2	Sphingomyelin	C41H83N2O6P	Carnitine C6:0-d3	-	LKQLRGMMMAHREN-UHFFFAOYSA-N	23.422	ESI+	[M+H]+	731.607	2.66354	Level 2
665	SM 36:3;O2	Sphingomyelin	C41H79N2O6P	SM d18:1/12:0	-	ILHBQLFXSXKKHW-UHFFFAOYSA-N	22.316	ESI+	[M+H]+	727.575	3.73716	Level 2
666	SM 38:2;O2	Sphingomyelin	C43H85N2O6P	5-Hydroxy-L-tryptophan-d4	-	LCCGGRXCXDWGPP-UHFFFAOYSA-N	23.527	ESI+	[M+H]+	757.622	2.29537	Level 2
667	SM 38:3;O2	Sphingomyelin	C43H83N2O6P	Guanosine-13C,15N2	-	MIRYBJRBVJWQBP-UHFFFAOYSA-N	22.868	ESI+	[M+H]+	755.607	9.64928	Level 2
668	SM 40:2;O2	Sphingomyelin	C45H89N2O6P	SM d18:1/12:0	-	UCLWWTCDZKLHGY-UHFFFAOYSA-N	20.368	ESI+	[M+H]+	785.654	5.51597	Level 2
669	SM 42:3;O2	Sphingomyelin	C47H91N2O6P	Phenylalanine-d5	-	QQXLDLHFVPBZNC-UHFFFAOYSA-N	20.529	ESI+	[M+H]+	811.669	6.20196	Level 2
670	SPB 17:0;O2	Sphingomyelin	C17H37NO2	CDCA-d4	-	KFQUQCFJDMSIJF-DLBZAZTESA-N	16.439	ESI+	[M+H]+	288.29	2.13687	Level 2
671	SPBP 18:0;O2	Sphingomyelin	C18H40NO5P	5-Hydroxy-L-tryptophan-d4	HMDB0001383	YHEDRJPUIRMZMP-ZWKOTPCHSA-N	4.429	ESI+	[M+H]+	382.272	5.90385	Level 2
672	(25S)-7-Dafachronic acid	Steroids	C27H42O3	CDCA-d4	-	SQTAVUCHOVVOFD-OBRBSRNPSA-N	18.262	ESI+	[M+H-H2O]+	397.311	5.66723	Level 2
673	(2R)-3-Hydroxyisovaleroylcarnitine	Steroids	C12H23NO5	LPC 19:0	HMDB0061189	IGLHHSKNBDXCEY-SECBINFHSA-N	4.689	ESI+	[M+H]+	262.165	4.12756	Level 2
674	(3beta)-26,27-Dinorcholest-5-en-24-yne-3,20-diol	Steroids	C25H38O2	4-Hydroxyproline-d3	-	SCMAJJQBADBBSM-PRQSBNOCSA-N	20.85	ESI+	[M+H]+	371.295	10.535	Level 2
675	1,α-Methyl-5,α-androstan-3,α,17β-diol glucuronide	Steroids	C26H42O8	CA-d4	-	BACAOLFQQOFQSW-ODZHPKQNSA-N	16.29	ESI-	[M-H]-	481.28	4.24585	Level 2
676	11,15-Dioxo-9S-hydroxy-5Z-prostenoic acid	Steroids	C20H32O5	PE(15:0/15:0)	HMDB0060042	VSRXYLYXIXYEST-KZTWKYQFSA-N	17.625	ESI+	[M+H]+	353.233	12.9753	Level 2
677	17beta-Estradiol hemisuccinate	Steroids	C22H28O5	CDCA-d4	-	YJPIDPAGJSWWBE-MCIJPOSHSA-N	14.055	ESI-	[M-H]-	371.186	3.512	Level 2
678	17α-Methyltestosterone	Steroids	C20H30O2	Guanosine-13C,15N2	HMDB0015655	GCKMFJBGXUYNAG-HLXURNFRSA-N	19.999	ESI+	[M+H]+	303.232	13.9545	Level 2
679	2-(3-hydroxyoctyl)-5-oxo-1-pyrrolidineheptanoic acid	Steroids	C19H35NO4	LPC 19:0	-	CBWGHEDGUILASE-UHFFFAOYSA-N	15.764	ESI+	[M+H]+	342.264	4.41514	Level 2
680	20.beta.-Hydroxyprednisolone	Steroids	C21H30O5	CDCA-d4	-	LCOVYWIXMAJCDS-LCGKLAOVSA-N	13.037	ESI+	[M+H]+	363.217	3.21417	Level 2
681	3b-Hydroxy-5-cholenoic acid	Steroids	C24H38O3	Phe-Trp-13C9,15N	HMDB0000308	HIAJCGFYHIANNA-QIZZZRFXSA-N	15.699	ESI-	M-H	373.274	5.01699	Level 1
682	3-Dehydroepiandrosterone sulfate	Steroids	C19H28O5S	Phe-Trp-13C9,15N	HMDB0001032	CZWCKYRVOZZJNM-USOAJAOKSA-N	13.647	ESI-	[M-H]-	367.158	2.46258	Level 2
683	3β-Allopregnanolone sulfate	Steroids	C21H34O5S	CDCA-d4	-	MENQCIVHHONJLU-FZCSVUEKSA-N	14.36	ESI-	[M-H]-	397.205	2.98599	Level 2
684	5.alpha.-Pregnan-3.alpha.,17-diol-20-one 3-sulfate	Steroids	C21H34O6S	CDCA-d4	-	MSAPJYZRJQHMSM-JRRMKBMNSA-N	13.649	ESI-	[M-H]-	413.2	2.24902	Level 2
685	5beta-Androstan-3alpha-ol-17-one sulfate	Steroids	C19H30O5S	Phe-Trp-13C9,15N	-	ZMITXKRGXGRMKS-BNSUEQOYSA-N	13.899	ESI-	[M-H]-	369.174	2.08187	Level 2
686	6beta-Hydroxy-17alpha-boldenone	Steroids	C19H26O3	NT-methylhistidine-d3	-	VLTNWNUPWHBSQY-HXEWTNOOSA-N	13.772	ESI+	[M+H]+	303.196	6.14645	Level 2
687	Alisol B acetate	Steroids	C32H50O5	Taurine-d4	-	NLOAQXKIIGTTRE-JSWHPQHOSA-N	20.015	ESI+	[M+H]+	515.374	8.10216	Level 2
688	Androstenediol sulfate	Steroids	C19H30O5S	CDCA-d4	-	HXJFCUUBVWOORF-LOVVWNRFSA-N	13.2	ESI-	[M-H]-	369.174	2.33324	Level 2
689	Bicyclo-prostaglandin E1	Steroids	C20H32O4	Ornithine-13C5	-	SMKXBJMWSIFUAU-YKNYVSNTSA-N	18.568	ESI+	[M+H]+	337.238	13.3458	Level 2
690	Bufalin	Steroids	C24H34O4	5-Hydroxy-L-tryptophan-d4	HMDB0249428	QEEBRPGZBVVINN-ZXRSHIDQSA-N	15.458	ESI+	[M+H]+	387.254	2.79384	Level 2
691	Corticosterone	Steroids	C21H30O4	NT-methylhistidine-d3	HMDB0001547	OMFXVFTZEKFJBZ-HJTSIMOOSA-N	14.068	ESI+	[M+H]+	347.222	2.46359	Level 1
692	CORTISOL	Steroids	C21H30O5	Ornithine-13C5	HMDB0000063	JYGXADMDTFJGBT-VWUMJDOOSA-N	13.477	ESI+	[M+H]+	363.217	1.56163	Level 1
693	Cortisone	Steroids	C21H28O5	Ornithine-13C5	HMDB0002802	MFYSYFVPBJMHGN-ZPOLXVRWSA-N	13.221	ESI+	[M+H]+	361.201	2.19429	Level 1
694	Desogestrel	Steroids	C22H30O	Hippuric acid-d5	HMDB0014449	RPLCPCMSCLEKRS-BPIQYHPVSA-N	20.522	ESI+	[M+H-H2O]+	293.227	17.364	Level 2
695	Levothyroxine	Steroids	C15H11I4NO4	CA-d4	HMDB0000248	XUIIKFGFIJCVMT-LBPRGKRZSA-N	3.721	ESI-	[M-H]-	775.679	22.4943	Level 2
696	Nandrolone	Steroids	C18H26O2	Carnitine C12:0-d3	HMDB0002725	NPAGDVCDWIYMMC-IZPLOLCNSA-N	17.934	ESI+	[M+H]+	275.201	20.4404	Level 2
697	Oxandrolone	Steroids	C19H30O3	Lysine-d4	HMDB0014759	QSLJIVKCVHQPLV-PEMPUTJUSA-N	18.012	ESI+	[M+H]+	307.227	15.236	Level 2
698	Pregnenolone sulfate	Steroids	C21H32O5S	CDCA-d4	HMDB0000774	DIJBBUIOWGGQOP-UHFFFAOYSA-N	14.822	ESI-	[M-H]-	395.189	2.6604	Level 2
699	Testosterone	Steroids	C19H28O2	CA-d4	HMDB0000234	MUMGGOZAMZWBJJ-DYKIIFRCSA-N	14.973	ESI+	[M+H]+	289.217	6.747	Level 1
700	testosterone benzoate	Steroids	C26H32O3	5-Hydroxy-L-tryptophan-d4	-	RZJSCADWIWNGKI-IXKNJLPQSA-N	19.602	ESI+	[M+H]+	393.243	4.79905	Level 2
701	testosterone cypionate	Steroids	C27H40O3	Phenylalanine-d5	-	HPFVBGJFAYZEBE-ZLQWOROUSA-N	19.481	ESI+	[M+H]+	413.306	5.09956	Level 2
702	Trenbolone acetate	Steroids	C20H24O3	Carnitine C16:0-d3	HMDB0259120	CMRJPMODSSEAPL-FYQPLNBISA-N	19.272	ESI+	[M+H]+	313.18	7.01932	Level 2
703	Ascorbic Acid	Vitamins	C6H8O6	Homocystine-d8	HMDB0000044	CIWBSHSKHKDKBQ-JLAZNSOCSA-N	4.907	ESI-	[M-H]-	175.024	11.4072	Level 2
704	Calcifediol monohydrate	Vitamins	C27H44O2	Guanosine-13C,15N2	-	JWUBBDSIWDLEOM-ZCJKAFFOSA-N	19.329	ESI+	[M+H]+	401.342	11.0208	Level 1
705	D-Gulono-1,4-lactone	Vitamins	C6H10O6	Lysine-d4	HMDB0243497	SXZYCXMUPBBULW-LECHCGJUSA-N	6.288	ESI-	[M-H]-	177.04	27.1649	Level 2
706	Gamma-CEHC	Vitamins	C15H20O4	NT-methylhistidine-d3	HMDB0001931	VMJQLPNCUPGMNQ-UHFFFAOYSA-N	13.801	ESI+	[M+H]+	265.144	1.53629	Level 2
707	Inositol	Vitamins	C6H12O6	Taurine-d4	HMDB0000211	CDAISMWEOUEBRE-GPIVLXJGSA-N	7.934	ESI-	[M-H]-	179.056	7.13677	Level 2
708	Neovitamin A	Vitamins	C20H30O	Carnitine C16:0-d3	HMDB0006221	FPIPGXGPPPQFEQ-HWCYFHEPSA-N	19.748	ESI+	[M+H-H2O]+	269.227	2.44092	Level 2
709	S-Methyl-methionine	Vitamins	C6H13NO2S	CA-d4	HMDB0257404	YDBYJHTYSHBBAU-UHFFFAOYSA-N	8.413	ESI+	[M+H]+	164.075	2.88493	Level 2
710	Vitamin E	Vitamins	C29H50O2	Homocystine-d8	HMDB0001893	GVJHHUAWPYXKBD-IEOSBIPESA-N	21.732	ESI-	[M-H]-	429.373	7.85872	Level 2
711	4,6-Dinitro-O-cresol	a Xenobiotics	C7H6N2O5	-	-	ZXVONLUNISGICL-UHFFFAOYSA-N	12.2403	ESI-	[M-H]-	197.02	-	Level 1
712	Amlodipine besylate	a Xenobiotics	C20H25ClN2O5	-	-	ZPBWCRDSRKPIDG-UHFFFAOYSA-N	14.0845	ESI+	[M+H]+	409.153	-	Level 1
713	Androstenedione	a Xenobiotics	C19H26O2	-	-	AEMFNILZOJDQLW-UHFFFAOYSA-N	14.4796	ESI+	[M+H]+	287.201	-	Level 1
714	Bis(2-butoxyethyl) phthalate	a Xenobiotics	C20H30O6	-	-	CMCJNODIWQEOAI-UHFFFAOYSA-N	17.0835	ESI+	[M+H]+	367.212	-	Level 1
715	Butyl methoxydibenzoylmethane	a Xenobiotics	C20H22O3	-	-	XNEFYCZVKIDDMS-UHFFFAOYSA-N	19.0925	ESI+	[M+H]+	311.165	-	Level 1
716	Cetirizine hydrochloride	a Xenobiotics	C21H25ClN2O3	-	-	PGLIUCLTXOYQMV-UHFFFAOYSA-N	14.1944	ESI+	[M+H]+	389.163	-	Level 1
717	Chloro-3-oxa-perfluorononanesulfonic acid	a Xenobiotics	C8HClF16O4S	-	-	OWQCHLFKOGVODW-UHFFFAOYSA-M	16.7129	ESI-	[M-H]-	530.895	-	Level 1
718	Chlorpheniramine maleate	a Xenobiotics	C16H19ClN2	-	-	DBAKFASWICGISY-UHFFFAOYSA-N	12.7032	ESI+	[M+H]+	275.132	-	Level 1
719	Cortisol	a Xenobiotics	C21H30O5	-	-	JYGXADMDTFJGBT-UHFFFAOYSA-N	13.3715	ESI+	[M+H]+	363.217	-	Level 1
720	Cyclamic acid	a Xenobiotics	C6H13NO3S	-	-	HCAJEUSONLESMK-UHFFFAOYSA-N	3.35204	ESI-	[M-H]-	178.054	-	Level 1
721	Cyromazine	a Xenobiotics	C6H10N6	-	-	LVQDKIWDGQRHTE-UHFFFAOYSA-N	3.32593	ESI+	[M+H]+	167.105	-	Level 1
722	Diclofenac Acid	a Xenobiotics	C14H11Cl2NO2	-	-	DCOPUUMXTXDBNB-UHFFFAOYSA-N	15.9045	ESI+	[M+H]+	296.025	-	Level 1
723	Diethyltoluamide	a Xenobiotics	C12H17NO	-	-	MMOXZBCLCQITDF-UHFFFAOYSA-N	13.8471	ESI+	[M+H]+	192.139	-	Level 1
724	Dinoseb	a Xenobiotics	C10H12N2O5	-	-	OWZPCEFYPSAJFR-UHFFFAOYSA-N	13.6589	ESI-	[M-H]-	239.067	-	Level 1
725	Dinoterb	a Xenobiotics	C10H12N2O5	-	-	IIPZYDQGBIWLBU-UHFFFAOYSA-N	13.6591	ESI-	[M-H]-	239.067	-	Level 1
726	Fipronil sulfone	a Xenobiotics	C12H4Cl2F6N4O2S	-	-	LGHZJDKSVUTELU-UHFFFAOYSA-N	16.8393	ESI-	[M-H]-	450.926	-	Level 1
727	Ganciclovir	a Xenobiotics	C9H13N5O4	-	-	IRSCQMHQWWYFCW-UHFFFAOYSA-N	4.72488	ESI+	[M+H]+	256.105	-	Level 1
728	Genistein	a Xenobiotics	C15H10O5	-	-	TZBJGXHYKVUXJN-UHFFFAOYSA-N	12.5459	ESI-	[M-H]-	269.045	-	Level 1
729	Hydroxyprogesterone	a Xenobiotics	C21H30O3	-	-	DBPWSSGDRRHUNT-UHFFFAOYSA-N	15.011	ESI+	[M+H]+	331.227	-	Level 1
730	Hydroxyprogesterone caproate	a Xenobiotics	C27H40O4	-	-	DOMWKUIIPQCAJU-UHFFFAOYSA-N	17.7916	ESI+	[M+H]+	429.3	-	Level 1
731	Irbesartan	a Xenobiotics	C25H28N6O	-	-	YOSHYTLCDANDAN-UHFFFAOYSA-N	14.5573	ESI+	[M+H]+	429.24	-	Level 1
732	Loratadine	a Xenobiotics	C22H23ClN2O2	-	-	JCCNYMKQOSZNPW-UHFFFAOYSA-N	16.3167	ESI+	[M+H]+	383.153	-	Level 1
733	Matrine	a Xenobiotics	C15H24N2O	-	-	ZSBXGIUJOOQZMP-UHFFFAOYSA-N	4.22468	ESI+	[M+H]+	249.197	-	Level 1
734	Metformin	a Xenobiotics	C4H11N5	-	-	XZWYZXLIPXDOLR-UHFFFAOYSA-N	4.089	ESI+	[M+H]+	130.109	-	Level 1
735	Monoethyl phthalate	a Xenobiotics	C10H10O4	-	-	YWWHKOHZGJFMIE-UHFFFAOYSA-N	12.7086	ESI+	[M+H]+	195.066	-	Level 1
736	Myclobutanil	a Xenobiotics	C15H17ClN4	-	-	HZJKXKUJVSEEFU-UHFFFAOYSA-N	15.0299	ESI+	[M+H]+	289.122	-	Level 1
737	Nicotine	a Xenobiotics	C10H14N2	-	-	SNICXCGAKADSCV-UHFFFAOYSA-N	3.99841	ESI+	[M+H]+	163.124	-	Level 1
738	Nifedipine	a Xenobiotics	C17H18N2O6	-	-	HYIMSNHJOBLJNT-UHFFFAOYSA-N	13.8079	ESI+	[M+H]+	347.124	-	Level 1
739	Norfloxacin	a Xenobiotics	C16H18FN3O3	-	-	OGJPXUAPXNRGGI-UHFFFAOYSA-N	3.79352	ESI+	[M+H]+	320.141	-	Level 1
740	Perfluorodecanoic acid	a Xenobiotics	C10HF19O2	-	-	PCIUEQPBYFRTEM-UHFFFAOYSA-N	17.0308	ESI-	[M-H]-	512.959	-	Level 1
741	Perfluoroheptanesulfonic acid	a Xenobiotics	C7HF15O3S	-	-	OYGQVDSRYXATEL-UHFFFAOYSA-N	15.5012	ESI-	[M-H]-	448.933	-	Level 1
742	Perfluoroheptanoic acid	a Xenobiotics	C7HF13O2	-	-	ZWBAMYVPMDSJGQ-UHFFFAOYSA-N	14.5237	ESI-	[M-H]-	362.969	-	Level 1
743	Perfluorohexanesulfonate (PFHxS)	a Xenobiotics	C6HF13O3S	-	-	QZHDEAJFRJCDMF-UHFFFAOYSA-N	14.597	ESI-	[M-H]-	398.936	-	Level 1
744	Perfluorononanoic acid	a Xenobiotics	C9HF17O2	-	-	UZUFPBIDKMEQEQ-UHFFFAOYSA-N	16.285	ESI-	[M-H]-	462.963	-	Level 1
745	Perfluorooctanesulfonate (PFOS)	a Xenobiotics	C8HF17O3S	-	-	YFSUTJLHUFNCNZ-UHFFFAOYSA-N	16.3197	ESI-	[M-H]-	498.93	-	Level 1
746	Perfluorooctanoic acid	a Xenobiotics	C8HF15O2	-	-	SNGREZUHAYWORS-UHFFFAOYSA-N	15.45	ESI-	[M-H]-	412.966	-	Level 1
747	Perfluoroundecanoic acid	a Xenobiotics	C11HF21O2	-	-	SIDINRCMMRKXGQ-UHFFFAOYSA-N	17.6802	ESI-	[M-H]-	562.956	-	Level 1
748	Phenylbutazone	a Xenobiotics	C19H20N2O2	-	-	VYMDGNCVAMGZFE-UHFFFAOYSA-N	15.2487	ESI+	[M+H]+	309.16	-	Level 1
749	Prednisolone	a Xenobiotics	C21H28O5	-	-	OIGNJSKKLXVSLS-UHFFFAOYSA-N	13.3725	ESI+	[M+H]+	361.201	-	Level 1
750	Progesterone	a Xenobiotics	C21H30O2	-	-	RJKFOVLPORLFTN-UHFFFAOYSA-N	16.1317	ESI+	[M+H]+	315.232	-	Level 1
751	RhodamineB	a Xenobiotics	C28H31N2O3+	-	-	PYWVYCXTNDRMGF-UHFFFAOYSA-N	14.9346	ESI+	[M+H]+	444.241	-	Level 1
752	Roxithromycin	a Xenobiotics	C41H76N2O15	-	-	RXZBMPWDPOLZGW-UHFFFAOYSA-N	14.7076	ESI+	[M+H]+	837.532	-	Level 1
753	Tadalafil	a Xenobiotics	C22H19N3O4	-	-	WOXKDUGGOYFFRN-UHFFFAOYSA-N	13.7598	ESI+	[M+H]+	390.145	-	Level 1
754	Tebuconazole	a Xenobiotics	C16H22ClN3O	-	-	PXMNMQRDXWABCY-UHFFFAOYSA-N	16.1292	ESI+	[M+H]+	308.153	-	Level 1
755	Testosterone	a Xenobiotics	C19H28O2	-	-	MUMGGOZAMZWBJJ-UHFFFAOYSA-N	14.8608	ESI+	[M+H]+	289.217	-	Level 1
756	Trimethoprim	a Xenobiotics	C14H18N4O3	-	-	IEDVJHCEMCRBQM-UHFFFAOYSA-N	11.7637	ESI+	[M+H]+	291.146	-	Level 1
a Xenobiotics were only extracted in every serum sample but in QCs.

## Sheet: Supplementary Data 9
Supplementary Data 9. The detection and quantitative frequency and distribution characteristic of the dectected exogenous chemical residues in human serum.
ID	Name	Chemical classes	Detection frequency (%)	Quantitative frequency (%)	Mean (ng/mL)	SD	Range(ng/mL)
1	BHT alcohol	Pollutants-UV Absorbers	100	97.4684	1.54345	0.331765	<LOD-2.446
2	Chlorferone	Pesticides-Insecticides	100	88.6076	0.61479	0.0640146	<LOD-0.778
3	4-Nitro-3-cresol	Pesticides-Insecticides	100	100	1.80435	0.436376	1.061-3.203
4	DNOC	Pollutants-Phenols	100	98.7342	0.954527	0.311675	<LOD-1.843
5	Androstenedione	Drugs-Hormones	100	100	0.926209	0.388803	0.149-2.097
6	BADP	Pollutants-Organic Flame Retardants	100	5.06329	0.148755	0.032062	<LOD-0.172
7	Bisphenol AF	Pollutants-Phenols	100	-	NA	NA	NA
8	9Cl-PF3ONS	Pollutants-PFASs	100	100	1.2239	1.58973	0.008-10.06
9	Cortisol	Drugs-Hormones	100	-	NA	NA	NA
10	Cyclamic acid	Drugs-Additives	100	100	11.5967	31.1245	0.099-200.1
11	Dazomet	Pesticides-Fungicides	100	100	1.73801	2.31839	0.509-12.85
12	Fipronil	Pesticides-Insecticides	100	100	0.0113939	0.00283717	0.007-0.019
13	Isopyrazam	Pesticides-Fungicides	100	100	0.631985	0.110044	0.38-0.946
14	Nicotine	Drugs-Others	100	100	1.61988	2.02624	<LOD-10.78
15	PFDoA	Pollutants-PFASs	100	82.2785	0.102403	0.044572	<LOD-0.225
16	PFHpA	Pollutants-PFASs	100	100	0.131713	0.0958229	0.051-0.709
17	PFHxS	Pollutants-PFASs	100	100	4.88966	2.59079	0.246-12.44
18	PFNA	Pollutants-PFASs	100	98.7342	2.34461	2.13884	<LOD-8.24
19	PFOA	Pollutants-PFASs	100	100	15.3156	14.1107	0.428-65.01
20	PFUdA	Pollutants-PFASs	100	100	1.81597	1.65968	0.019-6.442
21	RhodamineB	Pollutants-Dyes	100	58.2278	0.210963	0.434021	<LOD-2.868
22	Terbucarb	Pesticides-Herbicides	100	50.6329	0.341651	0.0602477	<LOD-0.462
23	tBPDP	Pollutants-Organic Flame Retardants	100	68.3544	0.0542114	0.00300586	<LOD-0.062
24	6:2 diPAP	Pollutants-PFASs	98.7342	98.7342	0.0316388	0.0139732	<LOD-0.093
25	Fipronil sulfone	Pesticides-Insecticides	98.7342	98.7342	0.105777	0.0886848	<LOD-0.589
26	Isonoruron	Pesticides-Herbicides	98.7342	98.7342	44.5063	49.7342	<LOD-271
27	Thiacloprid	Pesticides-Insecticides	98.7342	98.7342	0.00238039	0.000844325	<LOD-0.006
28	PFDA	Pollutants-PFASs	97.4684	91.1392	1.76559	1.30439	<LOD-5.539
29	Avobenzone	Pollutants-UV Absorbers	96.2025	31.6456	0.639368	0.733012	<LOD-2.864
30	PFTrDA	Pollutants-PFASs	96.2025	92.4051	0.244323	0.209623	<LOD-0.782
31	17-OHP	Drugs-Hormones	93.6709	93.6709	0.33077	0.11748	<LOD-0.683
32	Lufenuron	Pesticides-Insecticides	93.6709	93.6709	0.0555482	0.0359456	<LOD-0.193
33	Chlorbenzuron	Pesticides-Herbicides	91.1392	8.86076	0.039156	0.0162163	<LOD-0.064
34	Testosterone	Drugs-Hormones	88.6076	82.2785	4.1436	3.09895	<LOD-10.22
35	Rabenzazole	Pesticides-Fungicides	84.8101	48.1013	0.0779912	0.0252612	<LOD-0.131
36	Ketorolac	Drugs-Anti-inflammatory drugs	83.5443	70.8861	1.41754	1.00877	<LOD-5.087
37	17-OHPC	Drugs-Hormones	79.7468	77.2152	0.681855	0.418472	<LOD-2.419
38	Bisphenol S	Pollutants-Phenols	75.9494	-	NA	NA	NA
39	Fipronil-sulfide	Pesticides-Insecticides	75.9494	59.4937	0.00427602	0.00386588	<LOD-0.024
40	Mevinphos	Pesticides-Insecticides	74.6835	24.0506	1.3639	0.670886	<LOD-3.088
41	Mesulfenfos	Pesticides-Insecticides	69.6203	45.5696	0.00511833	0.00494707	<LOD-0.033
42	Tebufenozide	Pesticides-Insecticides	65.8228	65.8228	0.567712	0.22025	<LOD-1.128
43	PFHps	Pollutants-PFASs	64.557	62.0253	0.308045	0.214097	<LOD-1.007
44	PFOS	Pollutants-PFASs	64.557	54.4304	16.304	10.3989	<LOD-46.02
45	Diethyltoluamide	Pollutants-Others	60.7595	55.6962	0.12241	0.0935711	<LOD-0.484
46	DETX	Pollutants-Others	55.6962	35.443	0.0396522	0.0117689	<LOD-0.068
47	5-Oxo-MEHP	Pollutants-Others	55.6962	55.6962	1.01417	0.305398	<LOD-1.803
48	Quinoxyfen	Pesticides-Fungicides	55.6962	55.6962	0.0148579	0.0165415	<LOD-0.085
49	Fipronil Desulfinyl	Pesticides-Insecticides	44.3038	40.5063	0.0186177	0.00591424	<LOD-0.034
50	Dinoseb	Pollutants-Phenols	43.038	1.26582	0.260198	NA	<LOD-0.26
51	Butylparaben	Drugs-Additives	41.7722	40.5063	0.143834	0.0223606	<LOD-0.207
52	Fluacrypyrim	Pesticides-Insecticides	31.6456	-	NA	NA	NA
53	Progesterone	Drugs-Hormones	31.6456	13.9241	4.97828	7.35133	<LOD-19.43
54	Isobutylparaben	Drugs-Additives	29.1139	16.4557	0.297123	0.0264652	<LOD-0.34
55	Dinoterb	Pesticides-Herbicides	27.8481	-	NA	NA	NA
56	Halosulfuron-methyl	Pesticides-Herbicides	24.0506	22.7848	0.0288377	0.00906352	<LOD-0.056
57	Monoethyl phthalate	Pollutants-Others	22.7848	21.519	6.38907	8.37155	<LOD-32.66
58	Chlorothalonil	Pesticides-Fungicides	21.519	21.519	12.2643	8.35245	<LOD-30.86
59	Flunixin	Drugs-Anti-inflammatory drugs	21.519	18.9873	0.713662	0.922658	<LOD-2.673
60	Difenoconazole	Pesticides-Fungicides	18.9873	18.9873	0.0220076	0.0223024	<LOD-0.085
61	Medroxyprogesterone acetate	Drugs-Hormones	18.9873	-	NA	NA	NA
62	Diclofenac Acid	Drugs-Anti-inflammatory drugs	17.7215	15.1899	18.5161	62.049	<LOD-215.5
63	Genistein	Drugs-Hormones	17.7215	16.4557	4.12213	3.03912	<LOD-12.54
64	Chlorpheniramine	Drugs-Antihistamines	16.4557	12.6582	2.39532	3.79847	<LOD-11.46
65	Diphenamid	Pesticides-Herbicides	15.1899	15.1899	0.00674772	0.00576184	<LOD-0.025
66	Pioglitazone	Drugs-Others	15.1899	10.1266	0.00321711	0.000547143	<LOD-0.004
67	Cadusafos	Pesticides-Insecticides	13.9241	-	NA	NA	NA
68	Quinocetone	Drugs-Antimicrobial Agents	13.9241	3.79747	0.117605	0.0156588	<LOD-0.131
69	Salmeterol	Drugs-Adrenal receptor drugs	13.9241	1.26582	0.241264	NA	<LOD-0.241
70	Michler's ethyl ketone	Pollutants-Others	11.3924	3.79747	0.076843	0.0194657	<LOD-0.099
71	Bis(2-butoxyethyl) phthalate	Pollutants-Others	11.3924	3.79747	0.208006	0.051119	<LOD-0.261
72	Betaxolol	Drugs-Adrenal receptor drugs	10.1266	3.79747	0.105127	0.00312899	<LOD-0.108
73	Fluazuron	Pesticides-Insecticides	10.1266	10.1266	0.0817767	0.0559011	<LOD-0.172
74	Pyraclostrobin	Pesticides-Fungicides	10.1266	3.79747	0.02268	0.0117781	<LOD-0.035
75	Roxithromycin	Drugs-Antimicrobial Agents	10.1266	10.1266	37.4138	104.464	<LOD-295.9
76	Crufomate	Pesticides-Insecticides	8.86076	5.06329	0.0109955	0.000682606	<LOD-0.012
77	Isofenphos oxon	Pesticides-Insecticides	7.59494	7.59494	0.015333	0.00575915	<LOD-0.027
78	Siduron	Pesticides-Herbicides	7.59494	1.26582	0.218713	NA	<LOD-0.219
79	Cyromazine	Pesticides-Herbicides	6.32911	-	NA	NA	NA
80	Imibenconazole	Pesticides-Fungicides	6.32911	-	NA	NA	NA
81	Tebuconazole	Pesticides-Fungicides	6.32911	2.53165	0.486233	0.541621	<LOD-0.869
82	Acetamiprid	Pesticides-Insecticides	5.06329	1.26582	0.518631	NA	<LOD-0.519
83	Azithromycin	Drugs-Antimicrobial Agents	5.06329	5.06329	2.53225	1.06464	<LOD-3.422
84	Bromacil	Pesticides-Herbicides	5.06329	5.06329	7.91503	6.93922	<LOD-16.84
85	Norfloxacin	Drugs-Antimicrobial Agents	5.06329	5.06329	4.27783	4.62038	<LOD-11.16
86	Prochloraz-desimidazole-amino	Pesticides-Fungicides	5.06329	2.53165	0.0399238	0.0206466	<LOD-0.055
87	Sulfoxaflor	Pesticides-Insecticides	5.06329	5.06329	0.119291	0.0454404	<LOD-0.179
88	Desloratadine	Drugs-Antihistamines	3.79747	1.26582	0.308132	NA	<LOD-0.308
89	Diphenhydramine	Drugs-Antihistamines	3.79747	3.79747	0.179836	0.137605	<LOD-0.32
90	Ganciclovir	Drugs-Others	3.79747	3.79747	175.456	252.03	<LOD-465.1
91	Loratadine	Drugs-Antihistamines	3.79747	3.79747	0.256754	0.404156	<LOD-0.723
92	Matrine	Pesticides-Insecticides	3.79747	3.79747	22.7242	29.9157	<LOD-56.84
93	Methicillin	Drugs-Antimicrobial Agents	3.79747	2.53165	1.23603	0.869253	<LOD-1.851
94	Nicarbazin	Drugs-Antimicrobial Agents	3.79747	3.79747	0.0241909	0.0110629	<LOD-0.037
95	Prochloraz desimidazole-formylamino	Pesticides-Fungicides	3.79747	2.53165	0.0746602	0.0666849	<LOD-0.122
96	Trioxone	Pesticides-Fungicides	2.53165	2.53165	0.659634	0.0197354	<LOD-0.674
97	Sulisobenzone	Pollutants-UV Absorbers	2.53165	2.53165	3.66192	2.75495	<LOD-5.61
98	Boscalid	Pesticides-Fungicides	2.53165	1.26582	0.181908	NA	<LOD-0.182
99	Cetirizine	Drugs-Antihistamines	2.53165	2.53165	67.3924	95.2222	<LOD-134.7
100	Chlorantraniliprole	Pesticides-Fungicides	2.53165	-	NA	NA	NA
101	Dimefuron	Pesticides-Herbicides	2.53165	2.53165	5.23024	6.84671	<LOD-10.07
102	Erythromycin	Drugs-Antimicrobial Agents	2.53165	2.53165	0.275676	0.0507384	<LOD-0.312
103	Ethylparaben	Drugs-Additives	2.53165	-	NA	NA	NA
104	Fensulfothion-Sulfone	Pesticides-Insecticides	2.53165	2.53165	0.336612	0.406959	<LOD-0.624
105	Irbesartan	Drugs-Others	2.53165	2.53165	5.14471	7.19609	<LOD-10.23
106	Metformin	Drugs-Others	2.53165	2.53165	138.992	117.521	<LOD-222.1
107	Myclobutanil	Pesticides-Fungicides	2.53165	2.53165	0.463946	0.240087	<LOD-0.634
108	Nifedipine	Drugs-Others	2.53165	2.53165	34.2937	29.7119	<LOD-55.3
109	Noscapine	Drugs-Others	2.53165	2.53165	1.56601	1.57993	<LOD-2.683
110	Phenylbutazone	Drugs-Anti-inflammatory drugs	2.53165	2.53165	51.0318	71.9786	<LOD-101.9
111	Spirotetramat-enol	Pesticides-Insecticides	2.53165	1.26582	0.0121661	NA	<LOD-0.012
112	2-Ethylhexyl 4-(dimethylamino)benzoate	Pollutants-UV Absorbers	1.26582	-	NA	NA	NA
113	CCIM	Pesticides-Fungicides	1.26582	1.26582	0.0366843	NA	<LOD-0.037
114	Amlodipine besylate	Drugs-Others	1.26582	1.26582	9.76766	NA	<LOD-9.768
115	Brombuterol	Drugs-Adrenal receptor drugs	1.26582	1.26582	0.330686	NA	<LOD-0.331
116	Carbamazepine	Drugs-Others	1.26582	1.26582	0.193984	NA	<LOD-0.194
117	Cycluron	Pesticides-Herbicides	1.26582	1.26582	8.84067	NA	<LOD-8.841
118	Estrone	Drugs-Hormones	1.26582	1.26582	0.341045	NA	<LOD-0.341
119	Flufenoxuron	Pesticides-Insecticides	1.26582	1.26582	0.00822292	NA	<LOD-0.008
120	Flumequine	Drugs-Antimicrobial Agents	1.26582	-	NA	NA	NA
121	Fluopyram	Pesticides-Fungicides	1.26582	1.26582	0.00723352	NA	<LOD-0.007
122	Fluxapyroxad	Pesticides-Fungicides	1.26582	1.26582	0.0224427	NA	<LOD-0.022
123	Glyburide	Drugs-Others	1.26582	1.26582	0.446359	NA	<LOD-0.446
124	Hexestrol	Drugs-Hormones	1.26582	1.26582	0.672191	NA	<LOD-0.672
125	Isocarbophos	Pesticides-Insecticides	1.26582	1.26582	0.0359323	NA	<LOD-0.036
126	Isoxaflutole	Pesticides-Herbicides	1.26582	1.26582	0.595627	NA	<LOD-0.596
127	Mebendazole-amine	Drugs-Antimicrobial Agents	1.26582	1.26582	0.530349	NA	<LOD-0.53
128	Mecoprop	Pesticides-Fungicides	1.26582	1.26582	1.1439	NA	<LOD-1.144
129	Minoxidil	Drugs-Others	1.26582	-	NA	NA	NA
130	Moxifloxacin	Drugs-Antimicrobial Agents	1.26582	1.26582	1.58455	NA	<LOD-1.585
131	Naphthol Yellow S	Pollutants-Dyes	1.26582	-	NA	NA	NA
132	Nitrendipine	Drugs-Others	1.26582	1.26582	2.21761	NA	<LOD-2.218
133	Paclobutrazol	Pesticides-Others	1.26582	1.26582	0.134308	NA	<LOD-0.134
134	Prednisolone	Drugs-Hormones	1.26582	1.26582	39.0961	NA	<LOD-39.1
135	Promethazine	Drugs-Antihistamines	1.26582	1.26582	0.199125	NA	<LOD-0.199
136	Pyrazophos	Pesticides-Insecticides	1.26582	-	NA	NA	NA
137	Resmethrin	Pesticides-Insecticides	1.26582	1.26582	0.0428347	NA	<LOD-0.043
138	Secbumeton	Pesticides-Herbicides	1.26582	-	NA	NA	NA
139	Sethoxydim	Pesticides-Herbicides	1.26582	1.26582	0.0562852	NA	<LOD-0.056
140	Simeconazole	Pesticides-Fungicides	1.26582	1.26582	0.877087	NA	<LOD-0.877
141	Sulfanitran	Drugs-Antimicrobial Agents	1.26582	1.26582	0.0407314	NA	<LOD-0.041
142	Sulfoaildenafil	Drugs-Others	1.26582	1.26582	3.05279	NA	<LOD-3.053
143	Tadalafil	Drugs-Hormones	1.26582	1.26582	23.0003	NA	<LOD-23
144	Thiobencarb	Pesticides-Insecticides	1.26582	1.26582	0.260171	NA	<LOD-0.26
145	Tolbutamide	Drugs-Others	1.26582	1.26582	0.113856	NA	<LOD-0.114
146	Trimethoprim	Drugs-Antimicrobial Agents	1.26582	1.26582	1.31565	NA	<LOD-1.316

## Sheet: Supplementary Data 10
Supplementary Data 10. p value and fold change of differential metabolites of hypelipidemia and adjusted OR (95% confidence intervals) of diseases markers related to hypelipidemia.
Name	Metabolites classes	Differential metabolites			Diseases markers
		p value of non-parametric test	Fold change (Hyperlipidemia/control)		p value of binary logistic regression	β	Lower 95% CI	Upper 95% CI
4-Hydroxy-L-isoleucine	Amino Acid	0.00568872	1.2668		0.379573	2.0924	0.520391	27.0646
Carnosine	Amino Acid	0.0226662	0.355102		0.0453821	0.000404604	3.5886e-08	0.172895
Ergothioneine	Amino Acid	0.0226662	0.508705		0.0352815	0.331798	0.09961	0.788657
Fructoselysine	Amino Acid	0.00141968	1.41339		0.0101912	4.07477	1.60982	14.3305
N,N-Dimethyl-lysine	Amino Acid	0.0245362	1.33433		0.0534615	2.09597	1.04648	4.917
Serine	Amino Acid	0.0265384	0.822058		0.0479886	0.164184	0.0203866	0.695035
7-Ketolithocholic acid	Bile acid	0.0449061	1.12895		0.751783	1.38067	0.158936	21.9465
Gluconic acid	Carboxylic acid	0.0163699	1.20599		0.0647122	17.6263	1.14582	584.636
Indoxyl glucuronide	Carboxylic acid	0.0156964	0.649105		0.0649166	0.149843	0.0145245	0.929293
Monoethyl fumarate	Carboxylic acid	0.0177797	1.23966		0.0182556	3.54875	1.36419	11.7665
CAR 16:0	Carnitine	0.0138421	1.14733		0.0319723	3.8467	1.28043	15.9514
CAR 26:0	Carnitine	0.0334134	2.7507		0.10478	37.0128	1.06795	4705.59
CAR 26:1	Carnitine	0.0417585	1.25656		0.0306883	4.01432	1.31114	17.1056
FA 10:1	FA	0.0360208	0.705105		0.0365562	0.413316	0.156876	0.860952
FA 18:1	FA	0.00471366	1.69775		0.0488975	2.96081	1.14233	10.4929
FA 18:3;O2	FA	0.0286803	0.638613		0.0827484	0.328273	0.076559	0.916983
FA 20:4	FA	0.0482516	0.768433		0.0707343	0.341547	0.0933732	0.913955
FA 20:4;O	FA	0.00237613	0.575694		0.0123158	5.31075e-05	5.98599e-09	0.0401962
FA 20:4;O2	FA	0.0286803	0.690142		0.049601	0.0113228	5.55915e-05	0.506615
FA 22:2;O2	FA	0.00428523	0.616391		0.0335956	0.0629459	0.0033013	0.486888
Heptadecanoyl Ethanolamide	Fatty amide	0.0138421	1.12245		0.0256961	7.16333	1.60847	52.0864
NAE 6:0	Fatty amide	0.0286803	1.40984		0.0531317	2.69571	1.11267	8.62188
LPA 18:1	LPA	0.0334134	0.634609		0.0817989	0.0276406	0.000207368	0.620322
LPE 15:0	LPE	0.0417585	0.827015		0.102113	0.461225	0.167205	1.10919
LPE O-16:1	LPE	0.0334134	1.24938		0.485685	1.30633	0.644516	3.65739
LPE O-18:2	LPE	0.0192947	0.779363		0.230405	0.212619	0.0094152	1.90304
LPI 20:4	LPI	0.0177797	1.36395		0.0259522	2.87861	1.24982	8.21853
PC 32:2	PC	0.0417585	1.39876		0.0349924	2.58603	1.18886	7.25134
PC 36:6	PC	0.00353259	1.72315		0.0118196	2.76495	1.35307	6.80429
PC 36:7	PC	0.0360208	1.39695		0.0342223	2.4425	1.1569	6.32485
PC 38:3	PC	0.0150594	1.36546		0.0181894	3.28678	1.35653	10.1057
PC O-30:0	PC	0.0482516	1.39662		0.0463129	2.22915	1.0859	5.39707
PC O-32:4	PC	0.0360208	1.41787		0.0527629	3.67218	1.06062	15.4852
PE 36:2	PE	0.0417585	1.72163		0.155759	2.44075	0.980439	10.1613
Asn-Val-Arg	Peptide	0.0209213	1.61329		0.060861	2.11512	1.05782	5.22697
Pro-Leu-Lys	Peptide	0.0192947	1.30116		0.0183912	3.08645	1.33199	8.95784
Ser-Ala	Peptide	0.0334134	1.12679		0.0364977	2.46599	1.12963	6.35346
PI 38:4	PI	0.0051805	1.45299		0.0335465	2.51118	1.21069	6.83789
SM 35:1;O2	SM	0.0265384	1.15713		0.0503673	2.77576	1.1056	8.98687

[truncated: 3 more sheets: Supplementary Data 11, Supplementary Data 12, Supplementary Data 13]
