# Supplementary material for: A column-switching two-dimensional liquid chromatography - high resolution/triple quadrupole dual mass spectrometry system for simultaneously untargeted metabolome and targeted exposome analyses
Source: Research Square preprint supplement (doi:10.21203/rs.3.rs-5820559/v1), 2025-02-03
Supplement: Supplementary file 2 [file 2a4f56e2346353b74151e75b.xlsx]

## Sheet: Summary
Fig. 1. Workflow of this study. (Source data is not involved)
Fig. 2. Optimization of the column-switching 2DLC system.
Fig. 3. Chromatograms of the 2DLC-HRMS/TQMS method in positive and negative ion mode.
Fig. 4. Evaluation of the annotation coverage and sensitivity of the 2DLC-HRMS/TQMS method.
Fig. 5. Untargeted metabolome and targeted exposome analysis results in serum samples based on 2DLC-HRMS/TQMS method.
Fig. 6. Metabolome-exposome wide association study and risk analysis of hyperlipidemia.
Supplementary Figure 1(Fig. S1). Flow scheme of the column switching 2DLC method. (Source data is not involved)
Fig. S2. Chromatographic separations of different log P compounds on different columns.
Fig. S3. Separationss on developed 2DLC system and 1DLC.
Fig. S4. Method validation results of 2DLC-HR/TQMS method.
Fig. S5. Comparison of the numbers of compounds annotated from tissue and urine on three LC systems (2DLC, RPLC and HILIC).
Fig. S6. Metabolome profiling of hyperlipidemia samples.
Fig. S7. Metabolome profiling of UC and CD samples.
Fig. S8. Unique metabolome profiling of UC and CD samples.
Fig. S9. Concentration levels of serum chemical exposures in Ctrl, UC and CD groups.

## Sheet: Fig.2
Fugure 2a						Fugure 2b																		Fugure 2e and f
tR-RPLC	tR-HILIC	log P	Name			RPLC	HILIC	log P	Name	Water %	tR-3%	Water %	tR-5%	Water %	tR-7%	Water %	tR-10%	Water %	tR-12%	Water %	tR-15%			Name	log P	tR-PFP	tR-C18	tR-T3	tR-C8
0.831	9.74	-5.9	Cystine					7.0696	Erucamide	3	1.62	5	1.584	7	1.581	10	1.547	12	1.514	15	1.483			Pefloxacin	1.6105	3.708	3.31	3.93	4.04
0.903	9.164	-5.3	Homocystine					6.587	Ethyl oleate	3	1.62	5	1.6	7	1.549	10	1.526	12	1.514	15	1.475			5-Nitrobenzimidazole	1.4711	2.184	2.065	1.988	2.098
0.825	6.856	-4.67	Mannitol					6.4396	Fluazuron	3	1.616	5	1.585	7	1.55	10	1.519	12	1.48	15	1.451			Sulfachlorpyridazine	1.513	2.42	2.057	1.945
0.854	8.164	-4.6	Methionine sulfoxide					6.1969	Methyl oleate	3	1.62	5	1.6	7	1.573	10	1.526	12	1.514	15	1.481			Chlorimuron-ethyl	1.8257	0.908	0.406	0.225	0.544
1.895	6.264	-4.5	Betaine					5.8845	Linoleic acid	3	1.668	5	1.624	7	1.596	10	1.55	12	1.538	15	1.498			Tolbutamide	1.783	2.637	2.065	1.884	2.029
0.781	9.313	-4.22	Ornithine					5.8775	Spinosyn D	3	2.799	5	2.489	7	2.35	10	2.277	12	2.245	15	2.18			Gliclazide	1.6298	2.706	2.135	1.884	2.063
2.937	7.937	-4	Glutamine					5.8422	Lasalocid	3	1.651	5	1.585	7	1.585	10	1.554	12	1.515	15	1.486			Carbofuran-3-keto	1.7585	4.822	3.485	2.259	2.09
0.905	8.547	-4	Glutamic acid					5.6605	Calendic acid	3	1.668	5	1.624	7	1.596	10	1.526	12	1.538	15	1.504			Ethirimol	1.8527	3.186	2.475	2.085	2.195
0.837	8.477	-3.9	Citrulline					5.4874	Spinosyn A	3	2.834	5	2.489	7	2.35	10	2.277	12	2.245	15	2.18			Metolcarb	1.7132	4.926	2.683	1.98	2.542
0.797	8.32	-3.8718	N-acetylneuramic acid					5.1791	Etoxazole	3	1.618	5	1.599	7	1.587	10	1.55	12	1.517	15	1.494			Neotame	1.756	3.82	3.144	2.649	2.585
0.915	4.732	-3.77	Pseudouridine					5.0268	Fenpyroximate	3	1.58	5	1.549	7	1.549	10	1.511	12	1.479	15	1.484			Sulfathiazole	1.5261	3.012	2.336	2.085	2.195
1.999	7.402	-3.5	O-Acetyl-L-serine					5.0059	Car C18:0	3	4.198	5	3.151	7	2.591	10	2.313	12	2.28	15	2.215			Prazosin hydrochloride	1.7846	3.576	2.9	2.266	2.411
无	6.16	-3.2954	D-glucosamine-6-phosphate					4.9608	SudanI	3	1.651	5	1.62	7	1.585	10	1.554	12	1.55	15	1.521			Simetryn	1.4571	2.49	7.619	3.825	2.578
无	8.25	-3.255	Glucosamine					4.9023	Penthiopyrad	3	1.618	5	1.599	7	1.587	10	1.55	12	1.517	15	1.494			Saflufenacil	1.6623	1.883	0.65	0.468	0.648
无	8.111	-3.2214	D-Glucose					4.7819	Car C18:1	3	4.268	5	3.186	7	2.626	10	2.313	12	2.28	15	2.215			Nitenpyram	1.8519	3.812	3.031	2.293	2.507
无	9.174	-3.2	Arginine					4.7449	Flutolanil	3	1.615	5	1.584	7	1.549	10	1.511	12	1.514	15	1.484			Sulfapyridine	1.4646	2.072
0.776	9.278	-3.2	Lysine					4.7381	Fluridone	3	1.65	5	1.618	7	1.584	10	1.581	12	1.549	15	1.519			Clonidine hydrochloride	1.59	4.481	2.935	2.266	2.272
0.912	7.855	-3.2	N-Acetyl-L-lysine					4.673	Tralkoxydim	3	1.615	5	1.549	7	1.549	10	1.511	12	1.514	15	1.484			Triforine	1.4886	3.995
1.417	7.723	-3.17	trans-4-Hydroxy-L-proline					4.4779	Ursodeoxycholic acid	3	1.882	5	1.838	7	1.834	10	1.764	12	1.705	15	1.669			Metronidazole	0.092	3.75	2.518	2.122	2.487
无	6.195	-3.0776	N-Acetyl-D-glucosamine					4.3791	Pyrimidifen	3	1.65	5	1.967	7	1.584	10	1.581	12	1.549	15	1.519			Triamiphos	1.6067	4.578	3.205	2.362	2.229
0.849	7.885	-2.94	Threonine					4.2257	Car C16:0	3	4.455	5	3.325	7	2.696	10	2.313	12	2.28	15	2.215			Oxadixyl	1.65	2.789	1.625	0.608	0.3
3.014	7.768	-2.88	Asp-Leu					4.2062	Methoxyfenozide	3	1.615	5	1.584	7	1.549	10	1.546	12	1.514	15	1.519			Succinylsulfathiazole	1.7472	7.512	4.084	2.963	4.222
3.132	7.28	-2.7	Gly-Phe					4.2	1-(Tert-butylamino)-3-(2-cyclopentylphenoxy)propan-2-ol	3	3.324	5	2.782	7	2.492	10	2.281	12	2.248	15	2.191			Carbendazim	1.7412	4.822	3.345	2.363	2.09
0.993	5.951	-2.563	Cytidine					4.1455	Thenylchlor	3	1.65	5	1.584	7	1.584	10	1.546	12	1.549	15	1.519			Gatifloxacin	1.9804	6.222	3.596	3.136	4.465
1.716	6.23	-2.5398	1,5-Anhydro-glucitol					4.1338	Enilconazole	3	1.929	5	1.897	7	1.863	10	1.79	12	1.757	15	1.693			Dicyclanil	0.087	2.356	2.134		2.138
1.554	5.324	-2.2689	inosine					4.0082	Zoxamide	3	1.615	5	1.584	7	1.549	10	1.546	12	1.514	15	1.484			Fleroxacin	1.6992	6.249	5.538	3.546	3.517
2.702	7.206	-2.2224	N6-succinyl-Adenosine					3.9919	Lauric Acid	3	1.691	5	1.647	7	1.62	10	1.573	12	1.562	15	1.526			2-Amino-3-chloro-1,4-naphthoquinone	1.4747	3.464	1.987	1.91	1.985
3.185	1.586	-2.2131	Dyphylline					3.9591	Androsterone	3	1.69	5	1.688	7	1.651	10	1.616	12	1.618	15	1.588			Dapson	1.6838	5.519	3.623	2.328	2.333
1.162	7.048	-2.2	Methionine					3.8315	Fosthiazate	3	1.685	5	1.62	7	1.619	10	1.616	12	1.583	15	1.588			Ipronidazole	1.4517	2.427	1.89	1.778	1.923
2.919	7.28	-2.13	Ala-Leu					3.6842	4-Aminoazobenzene	3	1.755	5	1.758	7	1.619	10	1.581	12	1.583	15	1.554			Hexazinone	0.5132	9.427	8.714	7.954	7.328
0.904	8.877	-1.8713	l-glutamyl-l-threonine					3.4755	Napropamide	3	1.65	5	1.618	7	1.584	10	1.581	12	1.549	15	1.554			Lomefloxacin	1.7959	8.975	6.069	4.008	4.396
0.825	6.926	-1.8065	Carnitine					3.4487	Cholic acid	3	3.187	5	2.629	7	2.417	10	2.313	12	2.28	15	2.215			Spirotetramat-enol-glucoside	0.2886	7.985	7.133	6.339	2.682
1.019	7.716	-1.7	N-Acetyl-L-arginine					3.4455	Car C14:0	3	4.755	5	3.499	7	2.8	10	2.348	12	2.28	15	2.215			Brompyrazon	1.5772	7.852	7.096	3.337	2.125
0.831	8.007	-1.6094	Serine					3.3872	Clenpenterol hydrochloride	3	3.882	5	3.131	7	2.666	10	2.351	12	2.283	15	2.191			Cloransulam-methyl	1.9029	7.887	7.201	3.338	2.16
1.475	8.146	-1.4371	S-adenosyl-L-homocysteine					3.0022	4,4-Thiodianiline	3	1.859	5	1.688	7	1.654	10	1.651	12	1.618	15	1.588			Imidacloprid	0.6879	7.197	4.236	2.609	3.357
无	6.867	-1.432	N-Acetyl-serine					2.9067	Diphenamid	3	1.685	5	1.688	7	1.619	10	1.581	12	1.583	15	1.554			6-Benzylaminopurine	1.965	8.827	7.758	3.999	3.308
3.938	6.496	-1.4	Phe-Pro					2.6433	4,4-Oxydianiline	3	1.824	5	1.758	7	1.723	10	1.72	12	1.688	15	1.658			Ofloxacin	1.544	10.43	9.673	8.975	4.005
0.877	4.893	-1.3818	Melamine					2.5754	Metominostrobin	3	1.859	5	1.793	7	1.619	10	1.581	12	1.549	15	1.554			Methicillin	0.9491	21.826	20.313	18.996	18.509
3.586	5.677	-1.38	Phenylacetyl-L-Glutamine					2.5352	3,3-Dimethoxybenzidine	3	1.72	5	1.688	7	1.688	10	1.651	12	1.618	15	1.623			Iodosulfuron-methyl-sodium	1.0902	9.03	7.9	6.792	7.177
0.904	5.035	-1.2438	Metformin hydrochloride					2.518	Benzidine	3	1.789	5	1.827	7	1.723	10	1.685	12	1.723	15	1.693			Bromacil	1.5785	9.002	8.036	5.462	2.612
0.909	6.264	-1.2357	Car C2:0					2.4817	Dimethametryn	3	1.963	5	1.758	7	1.619	10	1.581	12	1.549	15	1.554			Flucetosulfuron	0.9879	7.044	6.402	3.571	2.264
0.932	8.494	-1.2322	Glutamylalanine					2.2499	Dormin	3	1.858	5	1.814	7	1.787	10	1.716	12	1.681	15	1.645			Oxamyl-oxime	0.2253	7.428	6.75	6.06	1.359
1.021	3.408	-1.2269	Creatinine					2.2341	Prometryn	3	1.685	5	1.618	7	1.619	10	1.581	12	1.583	15	1.554			Imidacloprid-olefin	1.5834	9.421	2.196	2.05
0.825	6.961	-1.1671	Taurine					2.1907	Ofurace	3	1.685	5	1.897	7	1.619	10	1.616	12	1.583	15	1.554			Oxydemeton-methyl	1.8891	9.595	8.524	7.582	2.891
0.865	6.508	-1.1254	Trigonelline					2.1825	3-Hydroxydecanoic acid	3	1.858	5	1.79	7	1.763	10	1.692	12	1.657	15	1.621			Metazosulfuron	0.488	7.776	7.029	6.095	3.204
0.887	4.558	-1.0605	Xanthine					2.0876	Mexacarbate	3	1.65	5	1.618	7	1.619	10	1.581	12	1.583	15	1.554			Marbofloxacin	0.5083	9.574	8.061	4.706	2.565
2.972	6.491	-1.06	Tryptophan					2.0663	Acetamiprid	3	1.789	5	1.758	7	1.723	10	1.685	12	1.688	15	1.658			Triasulfuron	1.3166	8.055	7.029	6.304	6.444
0.856	7.542	-1	Pyridoxamine					1.8891	Oxydemeton-methyl	3	1.963	5	2.106	7	1.863	10	2.034	12	1.792	15	1.763			Atenolol	0.4521	12.501	11.405	10.506	10.263
0.854	1.549	-0.9869	AMOZ					1.8527	Ethirimol	3	1.929	5	1.897	7	1.863	10	1.825	12	1.792	15	1.728			Monocrotophos	1.0537	10.097	9.245	8.311	5.142
3.611	5.522	-0.857	Lincomycin					1.7132	Metolcarb	3	1.615	5	1.584	7	1.549	10	1.546	12	1.514	15	1.484			Dimethoate	0.9829	9.818	8.304	7.544	7.615
1.694	5.568	-0.8456	Car C3:0					1.5772	Brompyrazon	3	1.859	5	1.793	7	1.758	10	1.72	12	1.688	15	1.658			2,4-Diaminoanisole	0.8596	10.854	9.759	8.755	6.632
3.729	4.338	-0.83	Phenformin hydrochloride					1.4571	Simetryn	3	1.72	5	1.688	7	1.654	10	1.651	12	1.618	15	1.588			Thiamphenicol	0.4043	10.34	9.454	8.416	8.172
0.842	6.29	-0.7929	N-Acetylglycine					1.4517	Ipronidazole	3	1.721	5	1.69	7	1.654	10	1.658	12	1.62	15	1.625			Oxycarboxin	1.3016	10.367	9.446	8.303	9.002
1.23	1.479	-0.7691	Sulfaguanidine					1.3176	Desethylsebutylazine	3	1.721	5	1.69	7	1.689	10	1.658	12	1.62	15	1.59			Cyanazine	1.6709	9.455	2.161	1.876	1.916
1.302	3.304	-0.7612	1-Methylguanine					1.2583	Sulfaethoxypyridazine	3	1.894	5	1.827	7	1.793	10	1.72	12	1.688	15	1.658			Aminopyralid	1.6688	11.275	4.155	3.974	4.049
1.432	4.805	-0.75	Amprolium			RPLC	HILIC	log P	Name	Water %	tR-3%	Water %	tR-5%	Water %	tR-7%	Water %	tR-10%	Water %	tR-12%	Water %	tR-15%			Fluconazole	0.7358	10.994	9.794	8.686	8.722
0.82	7.937	-0.6504	L-pyroglutamic acid					-4	Glutamine	3	18.06	5	17.746	7	17.254	10	16.106	12	14.75	15	11.411			Oryzalin	1.7768	10.682	6.199	2.963	2.342
0.876	4.767	-0.6479	Cytosine					-4.5	Betaine	3	3.12	5	2.886	7	2.716	10	2.479	12	2.347	15	2.216			Imidaclothiz	0.7494	10.819	9.793	8.686	8.512
0.814	8.738	-0.6359	Histidine					1.9804	Gatifloxacin	3	5.761	5	4.267	7	3.465	10	2.807	12	2.56	15	2.321			5-Chloro-1-methyl-4-nitroimidazole	0.9817	10.827	9.627	8.554	8.729
0.814	8.285	-0.6255	1-Methyl-L-histidine					1.965	6-Benzylaminopurine	3	2.346	5	2.315	7	2.28	10	2.242	12	2.21	15	2.146			Phenamacril	1.4431	9.169	7.83
2.575	4.443	-0.6254	Buformin hydrochloride					1.8498	Phe-Trp	3	10.92	5	7.958	7	5.9	10	4.229	12	3.569	15	2.981			Sulfadiazine	0.8596	11.133	10.002	8.86	9.071
1.47	2.631	-0.556	Daminozide					1.7959	Lomefloxacin	3	6.154	5	4.616	7	3.71	10	2.982	12	2.664	15	2.426			Flusilazole	1.9885	11.092	10.127	8.8	2.264
0.758	3.606	-0.5482	Lactic Acid					1.7063	1-Phenethylamine	3	5.336	5	4.336	7	3.637	10	3.044	12	2.767	15	2.528			1H-Imidazole-2-methanol, alpha,alpha,1-trimethyl-5-nitro-	0.5557	11.036	4.696	2.652	2.111
0.893	7.415	-0.4585	N-Acetyl-L-histidine					1.6546	Indoline	3	1.725	5	1.723	7	1.686	10	1.651	12	1.653	15	1.623			Diaveridine	1.249	12.317	10.177	9.382	9.522
2.697	4.941	-0.4555	Car C4:0					1.3793	Imazapic	3	2.172	5	2.106	7	2.071	10	2.034	12	2.001	15	1.971			Bensulfuron methyl	0.9319	9.587	8.387	7.209	7.246
1.919	2.942	-0.3897	Cyromazine					1.3747	Serotonin	3	10.816	5	8.097	7	6.179	10	4.543	12	3.918	15	3.329			Furaltadone	0.6747	9.914	2.552	2.052	2.104
0.816	6.615	-0.3824	1,4-Diazabicyclo[2.2.2]octane					1.3703	Gabapentin	3	4.787	5	3.863	7	3.327	10	2.768	12	2.561	15	2.365			Imazapic	1.3793	11.865	10.805	9.348	9.803
1.145	3.618	-0.3538	Hypoxanthine					1.3641	Indole-3-pyruvic acid	3	10.816	5	8.097	7	6.214	10	4.543	12	3.918	15	3.294			Halosulfuron-methyl	0.1777	9.239	5.497	2.177	0.488
0.932	8.007	-0.34	Pyruvic acid					1.2997	N-Acetyl-L-tryptophan	3	3.258	5	2.886	7	2.621	10	2.359	12	2.252	15	2.192			Sulfamethizole	1.2295	12.004	10.561	9.173	8.897
0.719	9.922	-0.3363	Spermidine					1.2173	Imazamox	3	2.277	5	2.21	7	2.141	10	2.103	12	2.071	15	2.006			Nalidixic acid	1.423	12.22	10.743	9.285	9.601
0.881	6.891	-0.177	Proline					1.1559	Indole-3-lactic acid	3	7.214	5	5.052	7	3.977	10	3.05	12	2.705	15	2.383			2-Methyl-5-nitroimidazole	0.6263	11.455	3.082	2.304	2.077
2.932	7.136	-0.1581	3-Hydroxybutyric acid					1.0743	Propamocarb	3	4.787	5	3.863	7	3.327	10	2.768	12	2.561	15	2.365			Albendazole-2-aminosulfone	1.3288	13.118	12.755	11.368	9.872
0.909	7.345	-0.0891	Histamine					0.902	3-Methoxytyramine hydrochloride, 99%	3	8.41	5	6.161	7	4.88	10	3.779	12	3.327	15	2.887			Florasulam	1.351	9.81	2.448	1.948
3.331	4.93	-0.0808	Pipemidic acid					0.8433	Cinoxacin	3	2.034	5	2.003	7	1.968	10	1.937	12	1.933	15	1.938			Vamidothion	1.9882	10.639	2.405	2.049	2.02
2.658	1.865	-0.0678	Olaquindox					0.8184	N-Acetyl-L-phenylalanine	3	3.122	5	2.815	7	2.621	10	2.382	12	2.276	15	2.216			Clindamycin phosphate	0.5065	11.412	4.084	3.027	2.87
3.554	4.454	-0.0654	Car C5:0					0.7968	Biotin	3	4.268	5	3.36	7	2.87	10	2.487	12	2.349	15	2.215			Dicrotophos	1.3959	12.493	11.78	10.185	9.559
1.072	3.025	-0.0649	Adenine					0.641	Phenylalanine	3	5.208	5	3.849	7	3.148	10	2.557	12	2.349	15	2.215			Clindamycin	0.3895	13.257	5.49	4.002	3.532
无	2.889	-0.0642	Succinic acid					0.6218	N-Acetyl-L-leucine	3	4.268	5	3.325	7	2.765	10	2.383	12	2.28	15	2.215			Enoxacin	0.6633	14.548	5.513	4.421	4.09
2.692	1.166	0.087	Dicyclanil					0.5702	Phthalimide	3	10.742	5	7.888	7	5.972	10	4.368	12	3.708	15	3.155			Sulfacetamide	0.0936	12.632	8.575	7.815	2.208
无	1.599	0.0879	2-Hydroxy-3-methylbutyric acid					0.4521	Atenolol	3	10.493	5	7.576	7	5.711	10	4.202	12	3.606	15	3.053			Nitrofurazone	0.19	10.994	2.796	2.227	2.104
3.331	2.05	0.2317	N-Acetyl-L-valine					0.4444	L-leucine	3	15.796	5	13.983	7	10.673	10	7.12	12	5.693	15	4.41			Sulfadoxin	0.8768	14.964	7.913	3.862	2.138
2.215	6.16	0.2535	L-kynurenine					0.4354	Leucylproline	3	16.075	5	14.994	7	11.23	10	7.712	12	6.042	15	4.584			Levofloxacin	1.544	12.457	9.124	5.156	3.386
4.395	4.036	0.3247	Car C6:0					0.2535	L-kynurenine	3	15.935	5	14.646	7	11.16	10	7.503	12	5.937	15	4.584			Foramsulfuron	0.2743	11.516	3.213	2.122	1.79
3.331	3.897	0.3466	L-tyrosine					0.2317	N-Acetyl-L-valine	3	3.12	5	2.886	7	2.716	10	2.479	12	2.347	15	2.216			Cinoxacin	0.8433	13.823	8.931	8.067	3.017
3.324	6.262	0.4354	Leucylproline					0.087	Dicyclanil	3	2.242	5	2.001	7	1.897	10	2.103	12	2.106	15	2.111			Sulfamethoxazole	1.366	14.651	9.027	8.128	4.994
无	2.418	0.4402	2-Oxovaleric acid			RPLC	HILIC	log P	Name	Water %	tR-3%	Water %	tR-5%	Water %	tR-7%	Water %	tR-10%	Water %	tR-12%	Water %	tR-15%			Chloridazon	1.4681	8.862	2.196	1.945
1.71	6.16	0.4444	L-leucine					0.524	N-Acetyl-L-tyrosine	3	4.954	5	4.17	7	3.62	10	3.002	12	2.729	15	2.454			Methylthiouracil	0.7409	13.906	6.925	6.06	1.01
2.731	5.209	0.4521	Atenolol					0.3466	L-tyrosine	3	16.91	5	16.212	7	15.026	10	11.021	12	8.898	15	6.325			Desethylsebutylazine	1.3176	15.8	8.261	7.432	2.556
1.704	3.897	0.524	N-Acetyl-L-tyrosine					-0.0649	Adenine	3	5.763	5	4.857	7	4.168	10	3.55	12	3.277	15	2.978			Flonicamid	1.3538	14.882	6.82	5.956	1.393
2.143	5.345	0.5702	Phthalimide					-0.0891	Histamine	3	17.117	5	16.506	7	15.728	10	13.636	12	11.792	15	10.062			4-Acetamidophenol	1.3506	16.506	8.514	7.719	2.878
4.372	1.702	0.6218	N-Acetyl-L-leucine					-0.0891	Histamine	3	17.117	5	16.506	7	15.728	10	13.636	12	11.792	15	10.062			Trimethoprim	1.2576	18.169	9.933	9.174
2.45	6.09	0.641	Phenylalanine					-0.177	Proline	3	19.349	5	19.278	7	19.136	10	18.719	12	18.302	15	17.226			Sulfabenzamide	1.3875	17.368	9.202	8.268	3.81
2.529	3.304	0.7798	Nicotinic acid					-0.3363	Spermidine	3	20.01	5	19.869	7	19.971	10	19.728	12	19.66	15	19.421			Saccharin sodium dihydrate	0.91	15.962	7.064	6.165	1.115
4.688	0.924	0.7816	Dimetilan					-0.34	Pyruvic acid	3	18.13	5	17.78	7	17.324	10	16.176	12	14.82	15	11.55			Tebuthiuron	1.6112	4.578	2.683	2.049
3.818	1.981	0.7968	Biotin					-0.3538	Hypoxanthine	3	7.143	5	5.589	7	4.682	10	3.811	12	3.498	15	3.12			Methiocarb sulfone	1.4251	17.076	7.795	6.757	6.374
4.451	2.05	0.8184	N-Acetyl-L-phenylalanine					-0.3824	1,4-Diazabicyclo[2.2.2]octane	3	15.585	5	14.208	7	11.479	10	8.655	12	7.09	15	5.604			Phthalimide	0.5702	13.851	11.327	10.637
无	2.004	0.8303	2-Oxohexanoic acid					-0.4585	N-Acetyl-L-histidine	3	17.502	5	17.083	7	16.488	10	14.574	12	12.248	15	9.251			Dimetridazole	0.6367		5.092	2.582	2.077
4.608	1.099	0.8433	Cinoxacin					-0.6255	1-Methyl-L-histidine	3	18.652	5	18.477	7	17.952	10	17.185	12	16.386	15	14.371			Chloramphenicol	0.909		6.386	2.818	2.138
2.155	4.909	0.902	3-Methoxytyramine hydrochloride, 99%					-0.6359	Histidine	3	19.105	5	18.929	7	18.579	10	17.953	12	17.292	15	15.799			Sulfamerazine	1.168		7.531	3.201	2.243
1.216	6.921	0.94	Phenylglycine					-0.6479	Cytosine	3	10.118	5	7.61	7	6.109	10	4.856	12	4.301	15	3.783			Sulfaethoxypyridazine	1.2583		8.331		2.626
3.154	2.806	0.95	N-Acetyl-L-methionine					-0.6504	L-pyroglutamic acid	3	18.06	5	17.746	7	17.254	10	16.106	12	14.75	15	11.411			Oxolinic acid	1.4483		8.004	6.931	7.001
3.024	2.784	1.0743	Propamocarb					-0.7929	N-Acetylglycine	3	9.929	5	8.124	7	11.118	10	5.074	12	4.276	15	3.501			Imazamox	1.2173			3.723
6.569	3.165	1.1049	Car C8:0					-1.0605	Xanthine	3	8.358	5	6.504	7	5.359	10	4.311	12	3.872	15	3.383			Simazine	1.3886		8.025	7.405
3.364	5.606	1.1559	Indole-3-lactic acid					-1.1254	Trigonelline	3	16.005	5	14.75	7	12.135	10	8.861	12	7.192	15	5.628			Gabapentin	1.3703		12.19	11.326
4.168	6.809	1.2	Acetanilide					-1.1671	Taurine	3	17.004	5	16.066	7	14.51	10	10.785	12	8.819	15	6.479			Bentazone	1.2075		8.966	8.101
4.715	1.375	1.2173	Imazamox					-1.2269	Creatinine	3	6.426	5	5.38	7	4.682	10	3.916	12	3.639	15	3.224			Norfloxacin	1.2683		11.048	10.115
4.472	0.992	1.2583	Sulfaethoxypyridazine					-1.2322	Glutamylalanine	3	18.687	5	18.512	7	18.265	10	17.674	12	17.048	15	15.277			Vydate	0.1071
4.417	2.155	1.2997	N-Acetyl-L-tryptophan					-1.2357	Car C2:0	3	15.657	5	13.426	7	10.567	10	7.015	12	5.589	15	4.235			Thifensulfuron-methyl	0.5471
5.869	0.957	1.3176	Desethylsebutylazine					-1.2438	Metformin hydrochloride	3	9.419	5	7.309	7	5.963	10	4.584	12	4.023	15	3.47			Propylthiouracil	1.385
5.51	4.941	1.3641	Indole-3-pyruvic acid					-1.3818	Melamine	3	8.059	5	6.564	7	5.555	10	4.611	12	4.266	15	3.818			Ciprofloxacin	1.5833
3.454	5.766	1.3703	Gabapentin					-1.6094	Serine	3	18.122	5	17.757	7	17.301	10	16.16	12	14.808	15	11.541			Famphur	1.833
1.868	4.941	1.3747	Serotonin					-1.8065	Carnitine	3	17.05	5	16.212	7	14.817	10	10.952	12	8.863	15	6.359			Betamethasone	1.8957
4.822	1.27	1.3793	Imazapic					-1.8713	l-glutamyl-l-threonine	3	19.07	5	18.964	7	18.753	10	18.301	12	17.815	15	16.635			N-Acetyl-L-leucine		3.412	3.122	2.673	2.674
4.317	1.061	1.3875	Sulfabenzamide					-2.5398	1,5-Anhydro-glucitol	3	8.191	5	7.099	7	6.216	10	5.145	12	4.586	15	3.979			N-Acetyl-L-tryptophan		4.768	3.479	2.769	2.888
1.296	无	1.4094	3-(4-Hydroxyphenyl) propionic acid					-2.563	Cytidine	3	14.543	5	11.197	7	9	10	6.423	12	5.415	15	4.479			Car C10:0		13.021	9.991	8.945	3.51
4.662	0.89	1.4517	Ipronidazole					-3.0776	N-Acetyl-D-glucosamine	3	15.135	5	11.894	7	10.358	10	6.841	12	5.728	15	4.723			2-Oxovaleric acid		3.293	3.075	3.007
6.519	0.922	1.4571	Simetryn					-3.2214	D-Glucose	3	18.122	5	17.733	7	17.181	10	15.916	12	14.519	15	11.66			Indole-3-lactic acid			3.763	3.379	3.446
4.613	1.259	1.4962	Suberic acid					-3.255	Glucosamine	3	18.374	5	18.059	7	17.638	10	16.698	12	15.725	15	13.221			N-Acetyl-L-phenylalanine		3.887	3.24	2.696	2.697
4.592	0.992	1.5772	Brompyrazon					-3.2954	D-glucosamine-6-phosphate	3	15.135	5	11.545	7	10.01	10	7.469	12	6.32	15	4.723			Phe-Trp		12.151	6.16	4.837	4.799
4.456	2.043	1.6546	Indoline					-3.77	Pseudouridine	3	10.118	5	7.575	7	6.144	10	4.856	12	4.301	15	3.783			2-Oxohexanoic acid		3.365	2.885	2.722	2.746
5.745	0.922	1.6709	Cyanazine					-3.8718	N-acetylneuramic acid	3	18.513	5	18.268	7	17.952	10	17.29	12	16.491	15	14.65			L-kynurenine		8.112	7.798	7.693	7.76
2.927	3.095	1.7063	1-Phenethylamine					-4.67	Mannitol	3	15.861	5	13.959	7	11.309	10	8.624	12	7.143	15	6.025			Car C8:0		12.324	9.398	5.88	3.197
11.221	0.852	1.7132	Metolcarb					-5.9	Cystine	3	19.741	5	19.71	7	19.658	10	19.5	12	19.336	15	18.744			Indole-3-pyruvic acid		11.489	8.216	5.742	6.68
3.942	4.269	1.7959	Lomefloxacin			RPLC	HILIC	log P	Name	Water %	tR-3%	Water %	tR-5%	Water %	tR-7%	Water %	tR-10%	Water %	tR-12%	Water %	tR-15%			2-Hydroxy-3-methylbutyric acid		2.84	2.646	2.53	2.578
4.563	4.906	1.8498	Phe-Trp					-0.4555	Car C4:0	3	11.721	5	9.003	7	6.492	10	4.562	12	3.744	15	3.12			Indoline		3.13	1.946	1.876	1.908
5.5	1.131	1.8527	Ethirimol					-0.0654	Car C5:0	3	10.362	5	7.262	7	5.343	10	3.811	12	3.29	15	2.772			Serotonin		6.718	4.803	4.768	4.87
8.894	2.747	1.8851	Car C10:0					0.3247	Car C6:0	3	8.76	5	6.112	7	4.577	10	3.357	12	2.941	15	2.528			N-Acetyl-L-tyrosine		3.531	3.313	3.174	3.293
3.516	1.026	1.8891	Oxydemeton-methyl					1.1049	Car C8:0	3	6.774	5	4.823	7	3.741	10	2.87	12	2.524	15	2.249			Biotin		3.34	3.13	2.781	2.779
4.521	1.167	1.94	2-Hydroxyquinoline					1.8851	Car C10:0	3	5.8	5	4.162	7	3.253	10	2.557	12	2.349	15	2.215			Nicotinic acid		3.77	3.63	3.56	3.592
5.152	1.305	1.965	6-Benzylaminopurine					2.6653	Car C12:0	3	5.173	5	3.779	7	2.974	10	2.417	12	2.28	15	2.215			L-tyrosine		11.386	11.386	11.28	11.313
4.205	4.13	1.9804	Gatifloxacin																					1-Phenethylamine		8.598	3.374	3.269	3.301
6.163	1.003	2	6-Hydroxytestosterone																					L-leucine		7.578	7.859	7.41	7.411
4.429	0.957	2.0663	Acetamiprid																					Phenylalanine		4.036	3.409	2.886	2.884
5.074	0.887	2.0876	Mexacarbate																					Leucylproline			8.047	7.931	7.932
7.004	0.979	2.1825	3-Hydroxydecanoic acid																					Car C6:0		11.384	4.662	3.756	3.614
6.279	0.887	2.1907	Ofurace																					N-Acetyl-L-valine		3.032	2.838	2.698	2.722
8.884	0.887	2.2341	Prometryn
5.913	1.11	2.2499	Dormin
4.872	1.308	2.2588	Albendazole sulfoxide
9.292	5.498	2.3681	Taurocholic acid
2.866	无	2.4418	4,4-Methylenedianiline
9.73	0.887	2.4817	Dimethametryn
2.334	0.957	2.518	Benzidine
3.88	0.922	2.5352	3,3-Dimethoxybenzidine
9.981	5.568	2.5649	Glycocholic acid
7.87	0.887	2.5754	Metominostrobin
8.111	无	2.64	Clomazone
9.63	无	2.6432	Simeconazole
2.401	0.957	2.6433	4,4-Oxydianiline
10.67	2.538	2.6653	Car C12:0
7.517	无	2.6668	Propachlor
7.45	0.887	2.8254	Buturon
9.472	无	2.873	Butafenacil
7.931	0.887	2.9067	Diphenamid
4.654	0.922	3.0022	4,4-Thiodianiline
9.184	0.933	3.17	17-Hydroxyprogesterone
4.857	2.561	3.3872	Clenpenterol hydrochloride
11.998	2.364	3.4455	Car C14:0
11.013	1.633	3.4487	Cholic acid
7.948	无	3.4572	Methfuroxam
8.312	1.935	3.472	Penbutolol
9.641	0.887	3.4755	Napropamide
8.043	无	3.4966	Fenthion oxon
7.164	无	3.5435	Benodanil
9.199	无	3.5833	Myclobutanil
9.174	3.792	3.5941	Glycoursodeoxycholic acid
8.29	0.887	3.6842	4-Aminoazobenzene
11.919	无	3.7177	Piperonyl butoxide
6.99	0.922	3.8315	Fosthiazate
9.588	无	3.8475	Bromobutide
8.909	0.968	3.87	Testosterone
10.767	无	3.9311	Butamifos
10.536	0.901	3.9591	Androsterone
10.663	2.553	3.9919	Lauric Acid
8.67	5.428	4	L-Thyroxine
11.277	无	4.0005	Dibenzylamine
10.453	0.852	4.0082	Zoxamide
9.691	无	4.1048	Monalide
8.504	4.338	4.1074	Salmeterol
7.258	1.061	4.1338	Enilconazole
9.547	0.887	4.1455	Thenylchlor
11.159	0.852	4.1983	Piperophos
8.446	1.969	4.2	1-(Tert-butylamino)-3-(2-cyclopentylphenoxy)propan-2-ol
9.058	0.887	4.2062	Methoxyfenozide
12.945	2.259	4.2257	Car C16:0
9.898	无	4.2458	Naproanilide
13.366	无	4.2729	Monensin
11.68	0.887	4.3791	Pyrimidifen
11.436	无	4.382	Tridecanoic acid
11.775	无	4.4062	Esprocarb
8.657	0.984	4.4779	Ursodeoxycholic acid
11.206	3.374	4.5481	Myristoleic acid
12.588	无	4.6656	Dicyclohexyl phthalate
12.169	0.852	4.673	Tralkoxydim
8.083	0.887	4.7381	Fluridone
8.974	0.852	4.7449	Flutolanil
12.091	无	4.7721	Myristic Acid
13.147	2.155	4.7819	Car C18:1
11.377	无	4.8444	Clethodim
10.39	0.855	4.9023	Penthiopyrad
12.498	0.89	4.9608	SudanI
13.707	2.155	5.0059	Car C18:0
12.624	0.852	5.0268	Fenpyroximate
13.102	0.865	5.1671	Acitretin
12.456	0.852	5.1791	Etoxazole
11.075	无	5.1944	Cadusafos
10.896	1.514	5.4874	Spinosyn A
12.287	0.878	5.6605	Calendic acid
13.492	0.89	5.8422	Lasalocid
11.394	1.514	5.8775	Spinosyn D
12.825	0.883	5.8845	Linoleic acid
13.693	0.867	6.1969	Methyl oleate
13.133	2.256	6.26	Palmitic acid
14.221	无	6.434	Narasin
12.284	0.855	6.4396	Fluazuron
14.153	0.861	6.587	Ethyl oleate
13.851	0.92	6.6	Oleamide
13.445	无	6.78	Oleic Acid
15.881	0.866	7.0696	Erucamide
14.808	0.861	7.5028	Heneicosanoic acid

## Sheet: Fig.3
Figure 3a and b
ID	Name	Chemical classes	Mass	Retention Time	ESI mode	First MRM transition			Second MRM transition
						MRM transition (m/z →m/z)	DP (V)	CE (V)	MRM transition (m/z →m/z)	DP (V)	CE (V)
1	(E)-Dimethomorph	Pesticides-Fungicides	387.124	14.9069	ESI+	388.1→301.1	40	30	388.1→165.1	30	45
2	2,4,5-Trichlorophenoxyacetic acid	Pesticides-Fungicides	253.93	13.5086	ESI-	252.9→194.9	-20	-20	252.9→158.9	-20	-40
3	2,4-Dichlorophenoxyacetic acid	Pesticides-Fungicides	219.969	12.7971	ESI-	219→161	-20	-20	219→125	-20	-35
4	4-Chloro-5-(p-tolyl)-1H-imidazole-2-carbonitrile	Pesticides-Fungicides	217.041	15.0525	ESI+	218→183.1	60	30	218→139	50	35
5	Acetochlor	Pesticides-Fungicides	269.118	15.4981	ESI+	270.1→148.1	30	30	270.1→133.1	20	45
6	Alachlor	Pesticides-Fungicides	269.118	15.4932	ESI+	270.1→162.1	20	30	270.1→147.1	30	45
7	Ametoctradin	Pesticides-Fungicides	275.211	16.7985	ESI+	276.2→176	120	51	276.2→149	120	51
8	Azoxystrobin	Pesticides-Fungicides	403.117	14.3246	ESI+	404.1→372.1	40	15	404.1→344.1	20	35
9	Benalaxyl	Pesticides-Fungicides	325.168	16.1839	ESI+	326.2→148.1	30	30	326.2→208.1	40	20
10	Benodanil	Pesticides-Fungicides	322.981	13.6127	ESI+	324→230.9	50	35	324→202.9	50	50
11	Benzovindiflupyr	Pesticides-Fungicides	397.056	16.7652	ESI-	396→368	-60	-30	396→131	-60	-35
12	Boscalid	Pesticides-Fungicides	342.033	14.6911	ESI+	343→307.1	90	30	343→271.1	50	45
13	Bromuconazole	Pesticides-Fungicides	374.954	15.0855	ESI+	376→159	50	35	376→173	20	35
14	Bupirimate	Pesticides-Fungicides	316.157	15.3632	ESI+	317.2→166.1	50	35	317.2→210.2	70	30
15	Carboxin	Pesticides-Fungicides	235.067	13.279	ESI+	236.1→143	30	20	236.1→124	30	30
16	Chlorantraniliprole	Pesticides-Fungicides	480.971	14.3944	ESI-	480→202	-40	-20	480→144.9	-40	-35
17	Cloquintocet - mexyl	Pesticides-Fungicides	335.129	17.6592	ESI+	336.1→238	30	20	336.1→192	40	40
18	Cyantraniliprole	Pesticides-Fungicides	472.005	13.467	ESI-	471→202	-50	-20	471→144.9	-50	-40
19	Cyflufenamid	Pesticides-Fungicides	412.121	16.5392	ESI+	413.1→295.1	40	20	413.1→241	30	35
20	Cyproconazole	Pesticides-Fungicides	291.114	15.2352	ESI+	292.1→125	50	50	292.1→139	40	35
21	Cyprodinil	Pesticides-Fungicides	225.127	15.6264	ESI+	226.1→108.1	60	35	226.1→119.1	60	40
22	Dazomet	Pesticides-Fungicides	162.029	4.00565	ESI+	163→117.1	20	40	163→120	20	25
23	Diaveridine	Pesticides-Fungicides	260.127	3.32775	ESI+	261.1→245.1	80	35	261.1→123.1	70	30
24	Difenoconazole	Pesticides-Fungicides	405.065	16.8202	ESI+	406.1→251	50	35	406.1→188	50	60
25	Dimethachlor	Pesticides-Fungicides	255.103	14.0771	ESI+	256.1→224.1	20	20	256.1→148.1	30	35
26	Dimethenamid	Pesticides-Fungicides	275.075	14.6301	ESI+	276.1→244.1	20	20	276.1→168.1	30	35
27	Dimethirimol	Pesticides-Fungicides	209.153	12.9535	ESI+	210.2→140.1	40	30	210.2→165.1	60	30
28	Dimoxystrobin	Pesticides-Fungicides	326.163	15.8876	ESI+	327.2→116	20	50	327.2→223.1	30	30
29	Diniconazole	Pesticides-Fungicides	325.075	16.7429	ESI+	326.1→159	70	45	326.1→173	40	40
30	Enestroburin	Pesticides-Fungicides	399.124	17.4735	ESI+	400.1→178	20	20	400.1→137	40	40
31	Enilconazole	Pesticides-Fungicides	296.048	13.6284	ESI+	297.1→159	50	35	297.1→255	20	25
32	Epoxiconazole	Pesticides-Fungicides	329.073	15.4134	ESI+	330.1→121	70	32	330.1→101	70	71
33	Etaconazole	Pesticides-Fungicides	327.054	15.4787	ESI+	328.1→159	40	35	328.1→187	30	30
34	Ethofumesate	Pesticides-Fungicides	286.087	14.448	ESI+	287.1→121.1	30	20	287.1→161.1	30	30
35	Fenamidone	Pesticides-Fungicides	311.109	14.6005	ESI+	312.1→236.1	20	20	312.1→103.1	20	25
36	Fenaminostrobin	Pesticides-Fungicides	433.096	17.1594	ESI+	434.1→171	30	35	434.1→212	30	20
37	Fenarimol	Pesticides-Fungicides	330.033	15.366	ESI+	331→268.1	20	35	331→139	90	50
38	Fenbuconazole	Pesticides-Fungicides	336.114	15.6295	ESI+	337.1→125	30	60	337.1→163	60	35
39	Fenhexamid	Pesticides-Fungicides	301.064	15.3116	ESI+	302.1→97.1	100	30	302.1→55.1	70	60
40	Fenoxanil	Pesticides-Fungicides	328.075	15.7791	ESI+	329.1→189	50	40	329.1→141.1	50	30
41	Fenpropidin	Pesticides-Fungicides	273.246	14.2354	ESI+	274.3→147.1	60	40	274.3→132.1	70	55
42	Fenpropimorph	Pesticides-Fungicides	303.256	14.4748	ESI+	304.3→147.1	80	40	304.3→130.1	90	35
43	Fenpyrazamine	Pesticides-Fungicides	331.135	15.0272	ESI+	332.1→230.1	30	25	332.1→216.1	40	35
44	Fluazifop-butyl	Pesticides-Fungicides	383.134	17.4205	ESI+	384.1→282.1	50	30	384.1→254.1	60	40
45	Flumorph	Pesticides-Fungicides	371.153	14.009	ESI+	372.2→285.1	140	25	372.2→165.1	50	45
46	Fluopicolide	Pesticides-Fungicides	381.965	14.8649	ESI+	383→173	30	30	383→145	30	75
47	Fluopyram	Pesticides-Fungicides	396.046	15.2268	ESI+	397.1→173	30	35	397.1→208	20	30
48	Flusilazole	Pesticides-Fungicides	315.1	15.7547	ESI+	316.1→165.1	30	35	316.1→219	30	45
49	Flusulfamide	Pesticides-Fungicides	413.946	15.8208	ESI-	412.9→171	-20	-50	412.9→349	-20	-35
50	Flutolanil	Pesticides-Fungicides	323.113	14.8063	ESI+	324.1→242.1	30	35	324.1→262.1	40	25
51	Flutriafol	Pesticides-Fungicides	301.103	13.673	ESI+	302.1→123	50	35	302.1→109	50	45
52	Fluxapyroxad	Pesticides-Fungicides	381.09	15.3044	ESI-	380.1→248	-50	-30	380.1→131	-50	-30
53	Furalaxyl	Pesticides-Fungicides	301.131	14.4172	ESI+	302.1→242.1	20	20	302.1→215.1	20	30
54	Furmecyclox	Pesticides-Fungicides	251.152	16.0859	ESI+	252.2→170.1	30	20	252.2→110.1	30	30
55	Griseofulvin	Pesticides-Fungicides	352.071	13.5738	ESI+	353.1→165.1	40	30	353.1→215	60	30
56	Haloxyfop-P-methyl	Pesticides-Fungicides	375.049	16.8805	ESI+	376.1→316	80	25	376.1→288	50	35
57	Hexaconazole	Pesticides-Fungicides	313.075	16.4537	ESI+	314.1→159	30	40	314.1→125	30	50
58	Imibenconazole	Pesticides-Fungicides	409.993	17.771	ESI+	411→125	20	55	411→171	90	25
59	Ipconazole	Pesticides-Fungicides	333.161	17.0739	ESI+	334.2→125	40	60	334.2→191.1	50	30
60	Isopyrazam	Pesticides-Fungicides	359.181	16.854	ESI+	360.2→244.1	70	35	360.2→320.2	40	30
61	Mandipropamid	Pesticides-Fungicides	411.124	14.695	ESI+	412.1→328.1	40	20	412.1→125	50	50
62	Mepanipyrim	Pesticides-Fungicides	223.111	15.1714	ESI+	224.1→106.1	30	35	224.1→131.1	40	35
63	Mepronil	Pesticides-Fungicides	269.142	14.8474	ESI+	270.1→119	50	35	270.1→136	50	25
64	Metalaxyl	Pesticides-Fungicides	279.147	13.8225	ESI+	280.2→160.1	30	35	280.2→192.1	30	25
65	Metconazole	Pesticides-Fungicides	319.145	16.4571	ESI+	320.2→125	60	60	320.2→177	30	30
66	Methfuroxam	Pesticides-Fungicides	229.11	14.1056	ESI+	230.1→137.1	40	30	230.1→111.1	40	20
67	Metominostrobin	Pesticides-Fungicides	284.116	13.9904	ESI+	285.1→194.1	50	30	285.1→166.1	30	45
68	Metrafenone	Pesticides-Fungicides	408.057	16.5851	ESI+	409.1→209.1	30	20	409.1→227	40	30
69	Moroxydine	Pesticides-Fungicides	171.112	4.2277	ESI+	172.1→60.1	50	20	172.1→113.1	30	30
70	Myclobutanil	Pesticides-Fungicides	288.114	15.0299	ESI+	289.1→125	60	45	289.1→151	40	35
71	Ofurace	Pesticides-Fungicides	281.082	13.0609	ESI+	282.1→160.1	30	35	282.1→148.1	40	35
72	Oxadixyl	Pesticides-Fungicides	278.127	12.7407	ESI+	279.1→132.1	30	40	279.1→117.1	20	70
73	Penconazole	Pesticides-Fungicides	283.064	16.1056	ESI+	284.1→159	30	45	284.1→123	30	70
74	Penflufen	Pesticides-Fungicides	317.19	16.0016	ESI+	318.2→141	40	35	318.2→234.1	110	20
75	Penthiopyrad	Pesticides-Fungicides	359.128	16.1373	ESI+	360.1→177	30	50	360.1→256	60	30
76	Phenamacril	Pesticides-Fungicides	216.09	12.8756	ESI+	217.1→104	30	35	217.1→146.1	20	25
77	Pretilachlor	Pesticides-Fungicides	311.165	17.0966	ESI+	312.2→252.1	20	25	312.2→176.1	30	40
78	Prochloraz desimidazole-formylamino	Pesticides-Fungicides	352.015	16.3699	ESI+	353→308	30	20	353→222.9	30	35
79	Prochloraz-desimidazole-amino	Pesticides-Fungicides	324.02	16.4978	ESI+	325→282	30	25	325→129.1	40	25
80	Propiconazole	Pesticides-Fungicides	341.07	16.3142	ESI+	342.1→159	50	35	342.1→187	60	30
81	Propisochlor	Pesticides-Fungicides	283.134	15.5796	ESI+	284.1→133.1	30	50	284.1→119.1	30	55
82	Proquinazid	Pesticides-Fungicides	372.033	18.5557	ESI+	373→288.9	20	35	373→331	20	20
83	Pyraclostrobin	Pesticides-Fungicides	387.099	16.3989	ESI+	388.1→163.1	30	40	388.1→133.1	20	50
84	Pyridaben	Pesticides-Fungicides	364.138	18.8701	ESI+	365.1→309.1	30	20	365.1→147.1	40	40
85	Pyrimethanil	Pesticides-Fungicides	199.111	14.324	ESI+	200.1→107.1	90	35	200.1→183.1	60	35
86	Pyrimorph	Pesticides-Fungicides	384.16	16.3603	ESI+	385.2→242	20	35	385.2→272.1	120	45
87	Pyrisoxazole	Pesticides-Fungicides	288.103	14.0389	ESI+	289.1→151.1	40	20	289.1→120	30	30
88	Pyroquilon	Pesticides-Fungicides	173.084	13.0779	ESI+	174.1→117.1	70	45	174.1→132.1	40	30
89	Quinoxyfen	Pesticides-Fungicides	306.997	17.8997	ESI+	308→197	50	45	308→214	30	50
90	Quizalofop-ethyl	Pesticides-Fungicides	372.088	17.2877	ESI+	373.1→299.1	30	25	373.1→271.1	30	35
91	Rabenzazole	Pesticides-Fungicides	212.106	13.7507	ESI+	213.1→172.1	40	30	213.1→145.1	30	40
92	Sedaxane	Pesticides-Fungicides	331.15	15.1156	ESI+	332.2→159	50	30	332.2→263.1	60	35
93	Silthiofam	Pesticides-Fungicides	267.111	15.9131	ESI+	268.1→139	50	30	268.1→194	20	40
94	Simeconazole	Pesticides-Fungicides	293.136	15.4354	ESI+	294.1→135.1	60	30	294.1→115.1	40	60
95	S-Metolachlor	Pesticides-Fungicides	283.134	15.583	ESI+	284.1→176.1	20	35	284.1→252.1	60	15
96	Tebuconazole	Pesticides-Fungicides	307.145	16.1292	ESI+	308.2→125	60	50	308.2→151	80	35
97	Tebufenpyrad	Pesticides-Fungicides	333.161	17.5453	ESI+	334.2→145.1	120	35	334.2→117	40	60
98	Thifluzamide	Pesticides-Fungicides	525.842	15.9556	ESI-	524.8→125	-30	-70	524.8→166	-30	-30
99	Tolfenpyrad	Pesticides-Fungicides	383.14	17.6768	ESI+	384.1→197.1	70	35	384.1→145.1	70	35
100	Triadimefon	Pesticides-Fungicides	293.093	14.9774	ESI+	294.1→141	40	30	294.1→129	30	30
101	Trifloxystrobin	Pesticides-Fungicides	408.13	17.0241	ESI+	409.1→145	30	65	409.1→116	30	40
102	Triflumizole-amino	Pesticides-Fungicides	294.075	12.9777	ESI+	295.1→215	50	35	295.1→195	50	40
103	(4-Chloro-2-methylphenoxy)acetic acid	Pesticides-Fungicides	200.024	12.7921	ESI-	199→141	-20	-20	-	-	-
104	2,6-Dichlorobenzamide	Pesticides-Fungicides	188.975	12.6482	ESI+	190→109	40	50	-	-	-
105	Carbendazim	Pesticides-Fungicides	191.069	13.8336	ESI+	192.1→160.1	100	20	-	-	-
106	Chlorothalonil	Pesticides-Fungicides	263.882	14.7519	ESI-	262.9→34.9	-60	-52	-	-	-
107	Dodine	Pesticides-Fungicides	227.236	16.7999	ESI+	228.2→186.2	60	25	-	-	-
108	Fenfuram	Pesticides-Fungicides	201.079	13.3333	ESI+	202.1→109	40	35	-	-	-
109	Fenoprop	Pesticides-Fungicides	267.946	14.0579	ESI-	266.9→194.9	-20	-20	-	-	-
110	Fluconazole	Pesticides-Fungicides	306.104	12.3743	ESI-	305.1→191.1	-30	-15	-	-	-
111	MCPB	Pesticides-Fungicides	228.055	13.7377	ESI-	227→141	-40	-25	-	-	-
112	Mecoprop	Pesticides-Fungicides	214.04	13.1713	ESI-	213→141	-20	-20	-	-	-
113	Monalide	Pesticides-Fungicides	239.108	15.9956	ESI-	238.1→126	-50	-30	-	-	-
114	N,N-Dimethyl-N'-p-tolylsulphamide	Pesticides-Fungicides	214.078	13.1841	ESI+	215.1→106.1	30	20	-	-	-
115	Propanil	Pesticides-Fungicides	217.006	14.5783	ESI+	218→127	140	25	-	-	-
116	Triclosan	Pesticides-Fungicides	287.951	17.7031	ESI-	286.9→35	-20	-38	-	-	-
117	Fludioxonil	Pesticides-Fungicides	248.04	15.0911	ESI-	247→126	-40	-40	-	-	-
118	Acifluorfen	Pesticides-Herbicides	360.996	14.3615	ESI-	360→195	-40	-40	360→222	-30	-35
119	Alloxydim sodium	Pesticides-Herbicides	345.155	15.748	ESI+	346.2→246.1	20	30	346.2→274.1	40	30
120	Amidosulfuron	Pesticides-Herbicides	369.041	13.2694	ESI+	370→218	20	35	370→139	40	50
121	Atraton	Pesticides-Herbicides	211.143	13.1124	ESI+	212.2→68	97	57	212.2→100.1	97	39
122	Atrazine	Pesticides-Herbicides	215.094	13.7889	ESI+	216.1→174	70	26	216.1→104	70	41
123	Aziprotryne	Pesticides-Herbicides	225.08	14.8711	ESI+	226.1→156	30	20	226.1→114	30	30
124	Bensulfuron methyl	Pesticides-Herbicides	410.09	14.0907	ESI+	411.1→149.1	30	30	411.1→182.1	50	25
125	Bentazone	Pesticides-Herbicides	240.057	11.9906	ESI-	239→132	-30	-35	239→197	-20	-25
126	Benzofenap	Pesticides-Herbicides	430.085	17.1762	ESI+	431.1→105.1	60	60	431.1→119	40	30
127	Butralin	Pesticides-Herbicides	295.153	18.3159	ESI+	296.2→240.1	20	20	296.2→222.1	20	30
128	Buturon	Pesticides-Herbicides	236.072	13.8094	ESI+	237.1→126	30	40	237.1→167	20	30
129	Chlorbenzuron	Pesticides-Herbicides	308.012	15.9828	ESI+	309→156	30	20	309→139	30	45
130	Chlorbromuron	Pesticides-Herbicides	291.961	14.6769	ESI+	293→203.9	30	25	293→125	40	50
131	Chlorimuron-ethyl	Pesticides-Herbicides	414.04	14.7215	ESI+	415→186	40	30	415→121	50	55
132	Chlorotoluron	Pesticides-Herbicides	212.072	13.6097	ESI+	213.1→140	30	35	213.1→104	40	45
133	Chloroxuron	Pesticides-Herbicides	290.082	15.6179	ESI-	289.1→134	-70	-40	289.1→120	-50	-45
134	Chlorsulfuron	Pesticides-Herbicides	357.03	13.1623	ESI+	358→141.1	30	30	358→167.1	50	25
135	Cinosulfuron	Pesticides-Herbicides	413.101	12.6791	ESI+	414.1→183.1	50	25	414.1→157.1	50	30
136	Clethodim	Pesticides-Herbicides	359.132	17.107	ESI+	360.1→164.1	50	25	360.1→136.1	40	45
137	Clethodim Sulfone	Pesticides-Herbicides	391.122	13.9968	ESI+	392.1→164.1	30	35	392.1→208.1	40	30
138	Clethodim Sulfoxide	Pesticides-Herbicides	375.127	14.0859	ESI+	376.1→206.1	50	25	376.1→164.1	20	30
139	Clomeprop	Pesticides-Herbicides	323.048	18.1571	ESI-	322→175	-20	-25	322→139	-20	-50
140	Cloransulam-methyl	Pesticides-Herbicides	429.031	13.1574	ESI+	430→370	40	30	430→306	30	40
141	Cumyluron	Pesticides-Herbicides	302.119	15.0448	ESI+	303.1→185	20	20	303.1→125	20	50
142	Cyanazine	Pesticides-Herbicides	240.089	12.8591	ESI+	241.1→214.1	20	25	241.1→104	60	40
143	Cycloxydim	Pesticides-Herbicides	325.171	16.9768	ESI+	326.2→180.1	30	30	326.2→101	40	25
144	Cyprazine	Pesticides-Herbicides	227.094	13.8318	ESI+	228.1→186.1	60	25	228.1→108.1	60	35
145	Cyromazine	Pesticides-Herbicides	166.097	3.32593	ESI+	167.1→85.1	30	25	167.1→125.1	70	25
146	Desethylsebutylazine	Pesticides-Herbicides	201.078	13.0764	ESI+	202.1→146	50	25	202.1→104	20	40
147	Desmethyl Norflurazon	Pesticides-Herbicides	289.023	13.5532	ESI+	290→270	90	35	290→179.1	90	45
148	Desmetryn	Pesticides-Herbicides	213.105	13.4082	ESI+	214.1→172.1	110	20	214.1→124.1	50	30
149	Dichlorprop	Pesticides-Herbicides	233.985	13.2251	ESI-	233→161	-20	-15	233→125	-20	-40
150	Diflufenican	Pesticides-Herbicides	394.074	16.9716	ESI+	395.1→266	60	35	395.1→238	30	55
151	Dimefuron	Pesticides-Herbicides	338.115	14.4948	ESI-	337.1→165	-50	-30	337.1→166	-50	-30
152	Dimethametryn	Pesticides-Herbicides	255.152	15.4974	ESI+	256.2→186.1	110	35	256.2→116	80	40
153	Dinoterb	Pesticides-Herbicides	240.075	13.6591	ESI-	239.1→207	-60	-35	239.1→176	-70	-50
154	Diphenamid	Pesticides-Herbicides	239.131	14.0644	ESI+	240.1→134.1	80	30	240.1→167.1	50	35
155	Diuron	Pesticides-Herbicides	232.017	13.9344	ESI+	233→72	60	25	233→160.2	60	29
156	Ethametsulfuron-methyl	Pesticides-Herbicides	410.101	13.2375	ESI+	411.1→196.1	30	20	411.1→168.1	50	45
157	Etobenzanid	Pesticides-Herbicides	339.043	16.1334	ESI+	340.1→179.1	70	25	340.1→149.1	30	30
158	Florasulam	Pesticides-Herbicides	359.03	12.5166	ESI+	360→129	50	30	360→144	50	35
159	Fluometuron	Pesticides-Herbicides	232.082	13.7404	ESI-	231.1→186	-20	-25	231.1→166	-40	-30
160	Fluridone	Pesticides-Herbicides	329.103	14.1323	ESI+	330.1→310.1	80	40	330.1→290.1	20	45
161	Flurprimidol	Pesticides-Herbicides	312.109	14.9355	ESI+	313.1→270.1	30	35	313.1→189	60	70
162	Flurtamone	Pesticides-Herbicides	333.098	14.4541	ESI+	334.1→247.1	50	35	334.1→178.1	60	65
163	Fluthiacet-methyl	Pesticides-Herbicides	403.023	14.302	ESI+	404→273	30	55	404→344	40	35
164	Foramsulfuron	Pesticides-Herbicides	452.111	13.1499	ESI+	453.1→182.1	40	30	453.1→139.1	40	65
165	Halosulfuron-methyl	Pesticides-Herbicides	434.041	12.514	ESI-	433→252	-50	-25	433→154.1	-20	-40
166	Hexazinone	Pesticides-Herbicides	252.159	13.1711	ESI+	253.2→171.1	60	20	253.2→101	40	40
167	Indoxacarb	Pesticides-Herbicides	527.071	16.9664	ESI+	528.1→203	40	65	528.1→218	50	35
168	Isonoruron	Pesticides-Herbicides	222.173	14.4878	ESI+	223.2→135.1	70	30	223.2→107.1	30	35
169	Isoproturon	Pesticides-Herbicides	206.142	13.8479	ESI+	207.1→134.1	30	30	207.1→119.1	40	40
170	Isoxaben	Pesticides-Herbicides	332.174	14.7661	ESI+	333.2→165.1	30	30	333.2→107	20	80
171	Isoxaflutole	Pesticides-Herbicides	359.044	12.6189	ESI-	358→108	-30	-45	358→159	-50	-45
172	Linuron	Pesticides-Herbicides	248.012	14.4688	ESI+	249→160	20	25	249→133	20	45
173	Mefenacet	Pesticides-Herbicides	298.078	15.0406	ESI+	299.1→148.1	30	20	299.1→120.1	30	35
174	Mesosulfuron-methyl	Pesticides-Herbicides	503.078	13.5	ESI+	504.1→182.1	40	30	504.1→139.1	20	75
175	Metazosulfuron	Pesticides-Herbicides	475.068	14.2866	ESI+	476.1→182.1	50	25	476.1→295	50	25
176	Methabenzthiazuron	Pesticides-Herbicides	221.062	13.7198	ESI+	222.1→165	50	20	222.1→150	30	50
177	Methoprotryne	Pesticides-Herbicides	271.147	14.0241	ESI+	272.2→170	50	40	272.2→198.1	120	30
178	Metobromuron	Pesticides-Herbicides	258	13.6474	ESI+	259→170	30	30	259→148.1	20	20
179	Metosulam	Pesticides-Herbicides	417.007	13.0086	ESI+	418→175	50	40	418→140	30	75
180	Metoxuron	Pesticides-Herbicides	228.067	12.7053	ESI+	229.1→156	30	35	229.1→106	20	45
181	Metribuzin	Pesticides-Herbicides	214.089	13.2092	ESI+	215.1→84	65	30	215.1→187.1	65	26
182	Metsulfuron-methyl	Pesticides-Herbicides	381.074	12.8987	ESI+	382.1→167.1	50	25	382.1→199	20	30
183	Monolinuron	Pesticides-Herbicides	214.051	13.4231	ESI+	215.1→126	20	25	215.1→148.1	40	20
184	Naproanilide	Pesticides-Herbicides	291.126	15.6577	ESI+	292.1→171.1	50	20	292.1→120.1	40	35
185	Napropamide	Pesticides-Herbicides	271.157	15.4157	ESI+	272.2→171.1	50	30	272.2→129.1	40	20
186	Neburon	Pesticides-Herbicides	274.064	16.3346	ESI-	273.1→160	-40	-30	273.1→186	-50	-25
187	Norflurazon	Pesticides-Herbicides	303.039	13.9086	ESI+	304→284	100	35	304→160	40	40
188	Oryzalin	Pesticides-Herbicides	346.095	15.9782	ESI-	345.1→147	-80	-35	345.1→174.1	-70	-35
189	Oxadiazon	Pesticides-Herbicides	344.069	17.7318	ESI+	345.1→220	30	30	345.1→177	50	40
190	Pencycuron	Pesticides-Herbicides	328.134	16.705	ESI+	329.1→125	40	60	329.1→106.1	40	30
191	Penoxsulam	Pesticides-Herbicides	483.064	13.2	ESI+	484.1→195.1	90	40	484.1→444.1	70	35
192	Picolinafen	Pesticides-Herbicides	376.083	17.602	ESI+	377.1→238	60	40	377.1→359.1	30	30
193	Prometryn	Pesticides-Herbicides	241.136	14.836	ESI+	242.1→158	90	35	242.1→200.1	90	25
194	Propazine	Pesticides-Herbicides	229.109	14.5463	ESI+	230.1→103.8	120	46	230.1→146.1	120	31
195	Propyrisulfuron	Pesticides-Herbicides	455.078	14.8803	ESI+	456.1→261	50	25	456.1→196.1	40	25
196	Pyrazoxyfen	Pesticides-Herbicides	402.054	16.1513	ESI+	403.1→105	80	25	403.1→139.1	80	35
197	Pyributicarb	Pesticides-Herbicides	330.14	17.8129	ESI+	331.1→181	30	25	331.1→108	30	40
198	Pyriftalid	Pesticides-Herbicides	318.067	14.1969	ESI+	319.1→139.1	30	40	319.1→220	60	35
199	Pyriminobac-methyl	Pesticides-Herbicides	361.127	14.7048	ESI+	362.1→330.1	50	15	362.1→256.1	30	35
200	Sebuthylazine	Pesticides-Herbicides	229.109	15.3368	ESI+	230.1→202.1	20	30	230.1→132	30	30
201	Secbumeton	Pesticides-Herbicides	225.159	13.6684	ESI+	226.2→142.1	80	35	226.2→170.1	130	25
202	Sethoxydim	Pesticides-Herbicides	327.187	17.4391	ESI+	328.2→178.1	30	30	328.2→150.1	30	40
203	Siduron	Pesticides-Herbicides	232.158	14.5373	ESI+	233.2→137.1	50	25	233.2→120	50	35
204	Simazine	Pesticides-Herbicides	201.078	13.2056	ESI+	202.1→132	70	28	202.1→124	70	26
205	Simetryn	Pesticides-Herbicides	213.105	13.3961	ESI+	214.1→124.1	50	30	214.1→144.1	40	30
206	Sulfentrazone	Pesticides-Herbicides	385.982	13.1807	ESI+	387→307	60	30	387→273	40	40
207	Tebutam	Pesticides-Herbicides	233.178	15.5677	ESI+	234.2→192.1	40	20	234.2→142.1	30	20
208	Tebuthiuron	Pesticides-Herbicides	228.104	13.2493	ESI+	229.1→116	40	35	229.1→172.1	70	20
209	Terbumeton	Pesticides-Herbicides	225.159	13.7226	ESI+	226.2→170.1	130	35	226.2→114.1	60	35
210	Terbuthylazine	Pesticides-Herbicides	229.109	14.4668	ESI+	230.1→174.1	30	25	230.1→104	30	45
211	Terbutryn	Pesticides-Herbicides	241.136	14.9238	ESI+	242.1→186.1	120	20	242.1→138.1	60	35
212	Thiazafluron	Pesticides-Herbicides	240.029	13.3159	ESI+	241→184	20	20	241→164	20	35
213	Thiazopyr	Pesticides-Herbicides	396.093	16.0522	ESI+	397.1→377.1	60	35	397.1→335	40	40
214	Thifensulfuron-methyl	Pesticides-Herbicides	387.031	12.8133	ESI+	388→167.1	40	20	388→205	20	35
215	Tralkoxidym	Pesticides-Herbicides	329.199	17.9486	ESI+	330.2→138.1	20	30	330.2→122.1	20	25
216	Triasulfuron	Pesticides-Herbicides	401.056	12.7943	ESI+	402.1→167.1	30	25	402.1→141.1	20	30
217	Triclocarban	Pesticides-Herbicides	313.978	16.9881	ESI+	315→127	60	45	315→162	20	25
218	Triflumuron	Pesticides-Herbicides	358.033	16.4954	ESI+	359→156	35	24	359→139	35	51
219	Triflusulfuron	Pesticides-Herbicides	492.104	13.2013	ESI-	491.1→236	-90	-25	491.1→196	-90	-48
220	Aminocyclopyrachlor	Pesticides-Herbicides	213.031	3.9145	ESI+	214→68	30	35	-	-	-
221	Benzoylprop-ethyl	Pesticides-Herbicides	365.059	16.344	ESI+	366.1→105	30	20	-	-	-
222	Bromacil	Pesticides-Herbicides	260.016	13.2918	ESI-	259→202.9	-50	-25	-	-	-
223	Clodinafop	Pesticides-Herbicides	311.036	13.417	ESI-	310→218	-20	-30	-	-	-
224	Cycluron	Pesticides-Herbicides	198.173	14.0295	ESI+	199.2→111.1	30	20	-	-	-
225	Flamprop-isopropyl	Pesticides-Herbicides	363.104	16.2261	ESI+	364.1→105	30	30	-	-	-
226	Flumetsulam	Pesticides-Herbicides	325.045	12.1905	ESI+	326.1→129	40	35	-	-	-
227	Forchlorfenuron	Pesticides-Herbicides	247.051	14.1212	ESI-	246→127	-30	-18	-	-	-
228	Lenacil	Pesticides-Herbicides	234.137	14.0623	ESI-	233.1→151.1	-40	-30	-	-	-
229	Terbucarb	Pesticides-Herbicides	277.204	16.9665	ESI+	278.2→109.1	20	30	-	-	-
230	Thidiazuron	Pesticides-Herbicides	220.042	13.1393	ESI-	219→100	-20	-10	-	-	-
231	3,4,5-Trimethylphenyl methylcarbamate	Pesticides-Insecticides	193.11	13.9696	ESI+	194.1→137.1	20	15	194.1→107	20	55
232	3-Chloro-7-hydroxy-4-methylcoumarin	Pesticides-Insecticides	210.008	12.8915	ESI-	209→145	-95	-28	209→117.2	-95	-42
233	Acetamiprid	Pesticides-Insecticides	222.067	12.3332	ESI+	223.1→126	40	30	223.1→90.1	40	50
234	Anilofos	Pesticides-Insecticides	367.023	16.1335	ESI+	368→125	20	45	368→171	20	30
235	Aspon	Pesticides-Insecticides	378.085	18.3824	ESI+	379.1→115	30	50	379.1→210.9	30	25
236	Brodifacoum	Pesticides-Insecticides	522.083	19.1837	ESI+	523.1→335	30	30	523.1→178.1	20	45
237	Bromfenvinphos	Pesticides-Insecticides	401.919	16.4576	ESI+	402.9→155	30	20	402.9→170	20	65
238	Buprofezin	Pesticides-Insecticides	305.156	17.4952	ESI+	306.2→116.1	30	25	306.2→106.1	40	40
239	Cadusafos	Pesticides-Insecticides	270.088	16.7928	ESI+	271.1→159	30	20	271.1→130.9	30	30
240	Carbofuran	Pesticides-Insecticides	221.105	13.112	ESI+	222.1→123	20	30	222.1→137.1	30	30
241	Chlorfenvinphos	Pesticides-Insecticides	357.97	16.2866	ESI+	359→170	20	50	359→204.9	40	30
242	Chlorthiophos	Pesticides-Insecticides	359.958	18.2149	ESI+	361→304.9	40	25	361→332.9	20	20
243	Chromafenozide	Pesticides-Insecticides	394.226	15.6832	ESI-	393.2→149.1	-80	-30	393.2→105.1	-40	-45
244	Clenpenterol hydrochloride	Pesticides-Insecticides	290.095	12.3874	ESI+	291.1→203	40	20	291.1→168	40	45
245	Coumaphos	Pesticides-Insecticides	362.014	16.1312	ESI+	363→227	40	35	363→307	70	25
246	Cyanofenphos	Pesticides-Insecticides	303.048	16.0682	ESI+	304.1→276	30	20	304.1→157	30	30
247	Demeton-S-methyl	Pesticides-Insecticides	230.02	14.8249	ESI+	231→89	70	40	231→61	50	30
248	Diazinon	Pesticides-Insecticides	304.101	16.209	ESI+	305.1→169.1	20	35	305.1→153.1	60	30
249	Diethyl phosphate	Pesticides-Insecticides	154.039	4.13074	ESI-	153→125	-30	-15	153→79	-30	-20
250	Dinitramine	Pesticides-Insecticides	322.089	16.5075	ESI+	323.1→289.1	40	25	323.1→247	50	25
251	Disulfoton sulfone	Pesticides-Insecticides	306.018	13.5987	ESI+	307→125	50	20	307→115	30	35
252	Disulfoton-sulfoxide	Pesticides-Insecticides	290.023	13.5193	ESI+	291→185	20	20	291→213	20	15
253	Emamectin benzoate	Pesticides-Insecticides	885.524	18.0311	ESI+	886.5→158.1	50	50	886.5→302.2	30	45
254	Ethiprole	Pesticides-Insecticides	395.983	15.0247	ESI-	395→330	-20	-20	395→262	-20	-40
255	Ethoprophos	Pesticides-Insecticides	242.056	15.435	ESI+	243.1→130.9	40	30	243.1→173	30	20
256	Etoxazole	Pesticides-Insecticides	359.17	18.2385	ESI+	360.2→141	70	40	360.2→304.1	20	25
257	Etrimfos	Pesticides-Insecticides	292.065	16.0296	ESI+	293.1→125	50	35	293.1→143	40	35
258	Famphur	Pesticides-Insecticides	325.021	13.518	ESI+	326→217	40	30	326→185	30	35
259	Fenamiphos	Pesticides-Insecticides	303.106	15.7033	ESI+	304.1→202	50	45	304.1→217	120	25
260	Fenamiphos sulfone	Pesticides-Insecticides	335.096	13.083	ESI+	336.1→266	50	30	336.1→188	40	40
261	Fenamiphos sulfoxide	Pesticides-Insecticides	319.101	13.0099	ESI+	320.1→233	70	35	320.1→171	60	30
262	Fenazaquin	Pesticides-Insecticides	306.173	18.7729	ESI+	307.2→161.1	20	25	307.2→131.1	30	60
263	Fenobucarb	Pesticides-Insecticides	207.126	16.1751	ESI+	208.1→121.1	110	25	208.1→148.1	120	20
264	Fenoxycarb	Pesticides-Insecticides	301.131	15.8024	ESI+	302.1→116.1	20	15	302.1→256.1	20	20
265	Fenpyroximate	Pesticides-Insecticides	421.2	18.4287	ESI+	422.2→366.1	20	25	422.2→135	60	45
266	Fensulfothion	Pesticides-Insecticides	308.031	13.7622	ESI+	309→157	40	35	309→173	40	30
267	Fensulfothion-oxon	Pesticides-Insecticides	292.053	12.5468	ESI+	293.1→237	60	25	293.1→157	30	35
268	Fensulfothion-oxon-sulfone	Pesticides-Insecticides	308.048	12.5639	ESI+	309.1→175	30	35	309.1→253	20	20
269	Fensulfothion-Sulfone	Pesticides-Insecticides	324.026	13.9	ESI+	325→269	40	25	325→191	30	35
270	Fenthion oxon	Pesticides-Insecticides	262.043	14.1559	ESI+	263.1→216	40	35	263.1→122	40	45
271	Fenthion sulfone	Pesticides-Insecticides	310.01	13.263	ESI+	311→125	40	25	311→109	40	40
272	Fipronil	Pesticides-Insecticides	435.939	16.3281	ESI-	434.9→250	-35	-37	434.9→330	-35	-23
273	Fipronil Desulfinyl	Pesticides-Insecticides	387.972	16.0972	ESI-	387→351	-30	-20	387→282	-30	-40
274	Fipronil sulfone	Pesticides-Insecticides	451.934	16.8379	ESI-	450.9→282	-30	-35	450.9→414.9	-30	-25
275	Fipronil-sulfide	Pesticides-Insecticides	419.944	16.522	ESI-	418.9→262	-20	-40	418.9→314	-20	-25
276	Fluacrypyrim	Pesticides-Insecticides	426.14	16.901	ESI+	427.1→145.1	70	35	427.1→117.1	20	65
277	Fluazuron	Pesticides-Insecticides	505.002	18.0765	ESI+	506→349	40	30	506→141	40	75
278	Flubendiamide	Pesticides-Insecticides	682.023	16.4916	ESI-	681→254	-40	-35	681→271.9	-40	-25
279	Flufenoxuron	Pesticides-Insecticides	488.036	18.3335	ESI+	489→158	60	25	489→141	40	70
280	Heptenophos	Pesticides-Insecticides	250.016	13.9535	ESI+	251→127	20	20	251→109	20	45
281	Hexythiazox	Pesticides-Insecticides	352.101	17.9639	ESI+	353.1→228	20	25	353.1→168.1	20	35
282	Isazofos	Pesticides-Insecticides	313.042	15.0977	ESI+	314→162	50	25	314→120	50	35
283	Isocarbophos	Pesticides-Insecticides	289.054	12.1731	ESI-	334.1→227.1	-70	-40	334.1→180.1	-80	-45
284	Isofenphos oxon	Pesticides-Insecticides	329.139	15.1527	ESI+	330.1→201	20	35	330.1→121	30	60
285	Isopropalin	Pesticides-Insecticides	309.169	18.69	ESI+	310.2→222.1	40	25	310.2→208.1	20	35
286	Isouron	Pesticides-Insecticides	211.132	13.2665	ESI+	212.1→167.1	30	25	212.1→128.1	50	25
287	Isoxathion	Pesticides-Insecticides	313.054	16.421	ESI+	314.1→105	20	20	314.1→114	30	40
288	Legurame	Pesticides-Insecticides	236.116	12.9001	ESI+	237.1→118.1	30	20	237.1→120	30	25
289	Lufenuron	Pesticides-Insecticides	509.978	18.5057	ESI-	509→175	-20	-50	509→326	-20	-25
290	Malachite green cation	Pesticides-Insecticides	328.194	13.7929	ESI+	329.2→313.2	140	55	329.2→208.1	120	60
291	Matrine	Pesticides-Insecticides	248.189	4.22468	ESI+	249.2→148.1	130	45	249.2→247.2	100	35
292	Mephosfolan	Pesticides-Insecticides	269.031	12.9767	ESI+	270→140	30	40	270→168	30	25
293	Mesulfenfos	Pesticides-Insecticides	294.015	13.1229	ESI+	295→280	30	25	295→109	50	45
294	Metaflumizone	Pesticides-Insecticides	506.118	18.41	ESI-	505.1→302.1	-60	-25	505.1→328.1	-60	-19
295	Methoxyfenozide	Pesticides-Insecticides	368.21	15.3267	ESI-	367.2→149.1	-40	-25	367.2→105.1	-40	-45
296	Metolcarb	Pesticides-Insecticides	165.079	16.9411	ESI+	166.1→109.1	20	20	166.1→107	20	35
297	Mevinphos	Pesticides-Insecticides	224.045	12.5665	ESI+	225.1→109	30	45	225.1→127	20	20
298	Paraoxon	Pesticides-Insecticides	275.056	13.6075	ESI+	276.1→220	20	25	276.1→174	30	35
299	Phorate sulfoxide	Pesticides-Insecticides	276.008	13.5641	ESI+	277→199	40	15	277→143	40	29
300	Phosfolan	Pesticides-Insecticides	255.015	12.6725	ESI+	256→140	50	35	256→168	30	25
301	Phosmet-oxon	Pesticides-Insecticides	301.017	13.463	ESI+	302→130	70	65	302→105	40	60
302	Phosphamidon	Pesticides-Insecticides	299.069	12.7579	ESI+	300.1→127	30	25	300.1→100.1	40	30
303	Piperophos	Pesticides-Insecticides	353.125	16.8965	ESI+	354.1→170.9	40	30	354.1→142.9	30	45
304	Pirimicarb	Pesticides-Insecticides	238.143	13.1731	ESI+	239.2→182.1	30	25	239.2→195.2	30	20
305	Pirimiphos-ethyl	Pesticides-Insecticides	333.128	17.548	ESI+	334.1→198.1	70	25	334.1→182.1	30	30
306	Pirimiphos-methyl	Pesticides-Insecticides	305.096	16.4377	ESI+	306.1→164.1	40	30	306.1→108.1	50	45
307	Propaphos	Pesticides-Insecticides	304.09	16.0976	ESI+	305.1→221	30	20	305.1→141	30	35
308	Propetamphos	Pesticides-Insecticides	281.085	15.1086	ESI+	282.1→138	50	30	282.1→110	20	50
309	Pyrazophos	Pesticides-Insecticides	373.086	16.4698	ESI+	374.1→222.1	60	30	374.1→194.1	50	50
310	Pyridaphenthion	Pesticides-Insecticides	340.065	15.0493	ESI+	341.1→189.1	30	30	341.1→205	20	30
311	Pyrimidifen	Pesticides-Insecticides	377.187	17.3759	ESI+	378.2→184.1	110	25	378.2→150.1	90	50
312	Pyriproxyfen	Pesticides-Insecticides	321.136	17.7919	ESI+	322.1→185.1	20	30	322.1→129.1	20	45
313	Quinalphos	Pesticides-Insecticides	298.054	15.8521	ESI+	299.1→163	40	35	299.1→129	40	55
314	Resmethrin	Pesticides-Insecticides	338.188	19.1297	ESI+	339.2→171.1	30	25	339.2→128.1	20	60
315	Spinetoram	Pesticides-Insecticides	747.492	17.3127	ESI+	748.5→142.1	100	45	748.5→203.1	50	40
316	Spinosyn A	Pesticides-Insecticides	731.461	16.7609	ESI+	732.5→142.1	20	40	732.5→189.1	20	45
317	Spinosyn D	Pesticides-Insecticides	745.476	17.2748	ESI+	746.5→142.1	50	35	746.5→189.1	60	45
318	Spirotetramat ketohydroxy	Pesticides-Insecticides	317.163	13.9207	ESI+	318.2→268.1	20	25	318.2→214.1	50	40
319	Spirotetramat-enol	Pesticides-Insecticides	301.168	13.4529	ESI+	302.2→216.1	50	35	302.2→270.1	30	30
320	Spirotetramat-mono-hydroxy	Pesticides-Insecticides	303.183	12.9769	ESI+	304.2→211.1	60	25	304.2→169.1	20	35
321	Sulfoxaflor	Pesticides-Insecticides	277.05	12.4813	ESI-	276→213.1	-30	-20	276→212	-20	-20
322	Tebufenozide	Pesticides-Insecticides	352.215	15.8225	ESI+	353.2→133.1	20	40	353.2→105.1	60	55
323	Tebupirimfos	Pesticides-Insecticides	318.117	17.6031	ESI+	319.1→277.1	30	20	319.1→153.1	20	45
324	Tetrachlorvinphos	Pesticides-Insecticides	363.899	15.9007	ESI+	364.9→127	40	20	364.9→203.9	50	60
325	Triazophos	Pesticides-Insecticides	313.065	15.1351	ESI+	314.1→162.1	20	25	314.1→119.1	40	50
326	Tribufos	Pesticides-Insecticides	314.096	18.8762	ESI+	315.1→169	50	20	315.1→112.9	30	30
327	3-Methyl-4-nitrophenol	Pesticides-Insecticides	153.043	12.364	ESI-	152→122.1	-76	-25	-	-	-
328	Chlorpyrifos	Pesticides-Insecticides	348.926	17.92	ESI+	349.9→197.9	20	25	-	-	-
329	Crufomate	Pesticides-Insecticides	291.079	14.4112	ESI+	292.1→236	50	25	-	-	-
330	Flonicamid	Pesticides-Insecticides	229.046	14.6403	ESI+	230.1→174	60	25	-	-	-
331	Fosthiazate	Pesticides-Insecticides	283.047	13.46	ESI+	284.1→104	20	30	-	-	-
332	Propamocarb	Pesticides-Insecticides	188.152	3.47221	ESI+	189.2→102.1	100	30	-	-	-
333	Prosulfocarb	Pesticides-Insecticides	251.134	17.1996	ESI+	252.1→91.1	20	45	-	-	-
334	Thiacloprid	Pesticides-Insecticides	252.024	12.4569	ESI+	253→126	20	25	-	-	-
335	Thiobencarb	Pesticides-Insecticides	257.064	16.6443	ESI+	258.1→125	30	30	-	-	-
336	Triamiphos	Pesticides-Insecticides	294.136	13.7615	ESI+	295.1→135.1	110	40	-	-	-
337	6-Benzylaminopurine	Pesticides-Others	225.101	13.0511	ESI-	224.1→133	-40	-30	224.1→106	-40	-45
338	alpha-Zearalenol	Pesticides-Others	320.162	14.7774	ESI-	319.2→160	-100	-40	319.2→174	-40	-35
339	Paclobutrazol	Pesticides-Others	293.129	14.816	ESI+	294.1→125	30	50	294.1→165	50	30
340	Pyridalyl	Pesticides-Others	488.968	20.0648	ESI+	490→109	60	60	490→183	30	25
341	Chlormequat chloride	Pesticides-Others	122.073	3.34418	ESI+	122.1→106	60	25	-	-	-
342	Ethoxyquin	Drugs-Additives	217.147	14.2304	ESI+	218.2→174.1	70	40	218.2→160.1	70	45
343	Ethylparaben	Drugs-Additives	166.063	13.1814	ESI-	165.1→137	-20	-20	165.1→136	-20	-20
344	Isobutyl 4-hydroxybenzoate	Drugs-Additives	194.094	14.8923	ESI-	193.1→137	-30	-20	193.1→136	-50	-25
345	Neotame	Drugs-Additives	378.215	14.0123	ESI+	379.2→172.1	30	30	379.2→259.2	30	35
346	Butylparaben	Drugs-Additives	194.094	14.8793	ESI-	193.1→136	-50	-20	-	-	-
347	Cyclamic acid	Drugs-Additives	179.062	3.35204	ESI-	178.1→80	-75	-37	-	-	-
348	3-O-methyl-Colterol	Drugs-Adrenal receptor drugs	239.152	11.4418	ESI+	240.2→134.1	20	35	240.2→149.1	20	30
349	Acebutolol	Drugs-Adrenal receptor drugs	336.205	12.1612	ESI+	337.2→116.1	80	30	337.2→260.1	60	30
350	Alprenolol	Drugs-Adrenal receptor drugs	249.173	12.9708	ESI+	250.2→116.1	30	25	250.2→107	30	45
351	Arformoterol Tartrate	Drugs-Adrenal receptor drugs	344.174	3.26478	ESI+	345.2→121.1	50	50	345.2→149.1	50	30
352	Atenolol	Drugs-Adrenal receptor drugs	266.163	3.93731	ESI+	267.2→145.1	30	35	267.2→190.1	30	25
353	Bambuterol	Drugs-Adrenal receptor drugs	367.211	12.3428	ESI+	368.2→294.1	140	20	368.2→249.1	30	35
354	Betaxolol	Drugs-Adrenal receptor drugs	307.215	12.9752	ESI+	308.2→116.1	70	30	308.2→121.1	70	35
355	Bisoprolol	Drugs-Adrenal receptor drugs	325.225	12.651	ESI+	326.2→116.1	50	25	326.2→107	20	65
356	Brombuterol	Drugs-Adrenal receptor drugs	363.979	12.3354	ESI+	365→290.9	30	25	365→212	30	40
357	Carazolol	Drugs-Adrenal receptor drugs	298.168	12.3266	ESI+	299.2→116.1	60	30	299.2→222.1	30	30
358	Cimaterol	Drugs-Adrenal receptor drugs	219.137	3.29223	ESI+	220.1→160.1	20	25	220.1→143.1	20	35
359	Clenbuterol	Drugs-Adrenal receptor drugs	276.08	12.1755	ESI+	277.1→259	40	17	277.1→203	40	25
360	Clenproperol	Drugs-Adrenal receptor drugs	262.064	12.0173	ESI+	263.1→203	30	25	263.1→132.1	20	40
361	Clorprenaline	Drugs-Adrenal receptor drugs	213.092	12.1979	ESI+	214.1→154	20	25	214.1→119.1	30	40
362	Isoxsuprine	Drugs-Adrenal receptor drugs	301.168	12.3328	ESI+	302.2→107	20	40	302.2→150.1	50	30
363	Mapenterol Hydrochloride	Drugs-Adrenal receptor drugs	324.122	12.5555	ESI+	325.1→237	30	20	325.1→217	30	35
364	Metoprolol	Drugs-Adrenal receptor drugs	267.183	3.92559	ESI+	268.2→116.1	70	25	268.2→133.1	60	35
365	Penbutolol	Drugs-Adrenal receptor drugs	291.22	14.4776	ESI+	292.2→201.1	50	30	292.2→133.1	50	35
366	Propranolol hydrochloride	Drugs-Adrenal receptor drugs	259.157	12.8662	ESI+	260.2→116.1	30	25	260.2→183.1	70	25
367	Ractopamine	Drugs-Adrenal receptor drugs	301.168	11.8907	ESI+	302.2→164.1	30	25	302.2→107	30	55
368	Salbutamol	Drugs-Adrenal receptor drugs	239.152	3.89195	ESI+	240.2→148.1	40	25	240.2→121.1	30	40
369	Salmeterol	Drugs-Adrenal receptor drugs	415.272	14.4946	ESI+	416.3→398.3	90	23	416.3→380.1	90	28
370	Timolol	Drugs-Adrenal receptor drugs	316.157	12.2287	ESI+	317.2→261.1	30	25	317.2→244.1	50	30
371	Tulobuterol	Drugs-Adrenal receptor drugs	227.108	12.3644	ESI+	228.1→154	30	25	228.1→119.1	30	40
372	Zilpaterol	Drugs-Adrenal receptor drugs	261.148	4.26197	ESI+	262.2→185.1	40	35	262.2→202.1	30	25
373	Ritodrine	Drugs-Adrenal receptor drugs	287.152	3.38098	ESI+	288.2→103.1	20	55	-	-	-
374	Brompheniramine	Drugs-Antihistamines	318.073	12.8348	ESI+	319.1→167.1	20	60	319.1→274	40	25
375	Cetirizine hydrochloride	Drugs-Antihistamines	388.155	14.1944	ESI+	389.2→201	40	25	389.2→165.1	40	80
376	Chlorpheniramine maleate	Drugs-Antihistamines	274.124	12.7032	ESI+	275.1→230.1	80	20	275.1→167.1	20	60
377	Cyproheptadine	Drugs-Antihistamines	287.167	13.6044	ESI+	288.2→191.1	70	40	288.2→215.1	40	65
378	Diphenhydramine hydrochloride	Drugs-Antihistamines	255.162	12.913	ESI+	256.2→167.1	20	25	256.2→152.1	40	50
379	Hydroxyzine dihydrochloride	Drugs-Antihistamines	374.176	13.8648	ESI+	375.2→201	40	30	375.2→166.1	20	55
380	Loratadine	Drugs-Antihistamines	382.145	16.3167	ESI+	383.2→337.1	130	35	383.2→267.1	90	50
381	Promethazine	Drugs-Antihistamines	284.135	13.3986	ESI+	285.1→198	30	35	285.1→240.1	30	25
382	Terfenadine	Drugs-Antihistamines	471.314	15.3374	ESI+	472.3→436.3	30	35	472.3→262.2	40	45
383	Tripelennamine hydrochloride	Drugs-Antihistamines	255.174	12.5424	ESI+	256.2→211.1	90	20	256.2→119.1	40	50
384	Desloratadine	Drugs-Antihistamines	310.124	3.31219	ESI+	311.1→294.1	20	30	-	-	-
385	Acetil acid	Drugs-Anti-inflammatory drugs	356.148	14.3866	ESI+	357.2→329.1	80	35	357.2→285.1	60	40
386	Flunixin	Drugs-Anti-inflammatory drugs	296.077	14.0017	ESI-	295.1→209.1	-30	-40	295.1→209.1	-40	-40
387	Ketoprofen	Drugs-Anti-inflammatory drugs	254.094	14.1391	ESI+	255.1→105	30	35	255.1→177.1	60	25
388	Ketorolac	Drugs-Anti-inflammatory drugs	255.09	13.5792	ESI+	256.1→105	70	25	256.1→178	40	35
389	Mefenamic Acid	Drugs-Anti-inflammatory drugs	241.11	17.0147	ESI+	242.1→224.1	20	25	242.1→209.1	30	40
390	Niflumic Acid	Drugs-Anti-inflammatory drugs	282.062	13.9783	ESI-	281.1→237.1	-20	-25	281.1→177	-20	-45
391	Phenylbutazone	Drugs-Anti-inflammatory drugs	308.152	15.2487	ESI+	309.2→120	60	25	309.2→160.1	50	30
392	Piroxicam	Drugs-Anti-inflammatory drugs	331.063	13.2081	ESI+	332.1→121	20	40	332.1→164.1	50	25
393	Sulindac	Drugs-Anti-inflammatory drugs	356.088	14.0604	ESI+	357.1→233.1	70	75	357.1→340.1	60	30
394	Carprofen	Drugs-Anti-inflammatory drugs	273.056	14.1621	ESI-	272→226	-20	-40	-	-	-
395	Diclofenac Acid	Drugs-Anti-inflammatory drugs	295.017	15.9045	ESI+	296→214	20	50	-	-	-
396	Diflunisal	Drugs-Anti-inflammatory drugs	250.044	13.43	ESI-	249→205	-40	-25	-	-	-
397	Flufenamic acid	Drugs-Anti-inflammatory drugs	281.066	14.7749	ESI-	280.1→215.1	-30	-40	-	-	-
398	Tolfenamic Acid	Drugs-Anti-inflammatory drugs	261.056	15.0419	ESI-	260→216.1	-30	-20	-	-	-
399	Albendazole	Drugs-Antimicrobial Agents	265.088	14.1612	ESI+	266.1→234.1	40	25	266.1→191	60	45
400	Arsanilic acid	Drugs-Antimicrobial Agents	216.972	4.59762	ESI+	218→109.1	30	25	218→108	30	30
401	Azithromycin	Drugs-Antimicrobial Agents	748.509	4.14774	ESI+	749.5→591.4	20	45	749.5→158.1	20	50
402	Ciprofloxacin	Drugs-Antimicrobial Agents	331.133	3.58633	ESI+	332.1→314.1	60	30	332.1→231.1	70	55
403	clinafoxacin,HCl	Drugs-Antimicrobial Agents	365.094	3.48321	ESI+	366.1→348.1	30	25	366.1→272.1	40	40
404	Clindamycin	Drugs-Antimicrobial Agents	424.18	3.40373	ESI+	425.2→126.1	116	37	425.2→377.2	140	27
405	Danofloxacin	Drugs-Antimicrobial Agents	357.149	3.44621	ESI+	358.2→340.1	70	30	358.2→255.1	40	55
406	Difloxacin hydrochloride	Drugs-Antimicrobial Agents	399.139	12.0378	ESI+	400.1→382.1	20	35	400.1→356.2	20	30
407	Enrofloxacin	Drugs-Antimicrobial Agents	359.165	3.42348	ESI+	360.2→342.2	50	30	360.2→316.2	60	30
408	Erythromycin	Drugs-Antimicrobial Agents	733.461	13.6208	ESI+	734.5→158.1	30	35	734.5→576.4	20	25
409	Ethopabate	Drugs-Antimicrobial Agents	237.1	12.8384	ESI+	238.1→136	20	40	238.1→164.1	20	30
410	Fenbendazole	Drugs-Antimicrobial Agents	299.073	14.9714	ESI+	300.1→268.1	130	25	300.1→159	80	45
411	Fleroxacin	Drugs-Antimicrobial Agents	369.13	3.3605	ESI+	370.1→326.1	80	30	370.1→352.1	30	30
412	Flumequine	Drugs-Antimicrobial Agents	261.08	13.1402	ESI+	262.1→244.1	110	20	262.1→202	30	50
413	Gatifloxacin	Drugs-Antimicrobial Agents	375.159	3.41173	ESI+	376.2→358.2	80	30	376.2→261.1	40	45
414	Josamycin	Drugs-Antimicrobial Agents	827.467	14.2388	ESI+	828.5→174.1	20	40	828.5→109.1	30	80
415	Ketoconazole	Drugs-Antimicrobial Agents	530.149	13.8091	ESI+	531.2→489.1	60	45	531.2→244	140	45
416	Mebendazole	Drugs-Antimicrobial Agents	295.096	13.4857	ESI+	296.1→264.1	70	30	296.1→105	30	45
417	Mebendazole-amine	Drugs-Antimicrobial Agents	237.09	12.4699	ESI+	238.1→105	90	35	238.1→133.1	70	45
418	Methicillin	Drugs-Antimicrobial Agents	380.104	6.68539	ESI+	381.1→222.1	40	35	381.1→128.1	20	40
419	Moxifloxacin	Drugs-Antimicrobial Agents	401.175	3.41356	ESI+	402.2→384.2	20	30	402.2→364.2	70	40
420	N4-phthalylsulfathiazole	Drugs-Antimicrobial Agents	403.03	12.145	ESI+	404→156	40	30	404→149	40	50
421	Nadifloxacin	Drugs-Antimicrobial Agents	360.149	13.339	ESI+	361.2→343.1	150	45	361.2→283.1	50	50
422	Naftifine hydrochloride	Drugs-Antimicrobial Agents	287.167	13.4541	ESI+	288.2→117.1	30	20	288.2→141.1	20	40
423	Nalidixic acid	Drugs-Antimicrobial Agents	232.085	12.9874	ESI+	233.1→187.1	20	35	233.1→215.1	20	20
424	Nicarbazin	Drugs-Antimicrobial Agents	302.065	15.4439	ESI-	301.1→137	-40	-26	301.1→107	-40	-50
425	Norfloxacin	Drugs-Antimicrobial Agents	319.133	3.79352	ESI+	320.1→302.1	30	30	320.1→282.1	40	45
426	Orbifloxacin	Drugs-Antimicrobial Agents	395.146	11.9915	ESI+	396.2→352.2	40	25	396.2→378.1	50	30
427	Oxfendazole	Drugs-Antimicrobial Agents	315.068	12.7592	ESI+	316.1→159	70	50	316.1→191.1	60	30
428	Oxfendazole-Sulfone	Drugs-Antimicrobial Agents	331.063	12.7799	ESI+	332.1→300	80	30	332.1→159	70	50
429	Oxilinic acid	Drugs-Antimicrobial Agents	261.064	12.5271	ESI+	262.1→244.1	70	20	262.1→216	30	40
430	Pazufloxacin mesilate	Drugs-Antimicrobial Agents	318.102	3.523	ESI+	319.1→301.1	30	25	319.1→281.1	30	35
431	Pipemidic acid	Drugs-Antimicrobial Agents	303.133	3.82805	ESI+	304.1→286.1	50	25	304.1→215.1	50	45
432	Quinocetone	Drugs-Antimicrobial Agents	306.1	13.3599	ESI+	307.1→103.1	30	55	307.1→131	40	35
433	Roxithromycin	Drugs-Antimicrobial Agents	836.525	14.7076	ESI+	837.5→679.4	40	35	837.5→158.1	60	35
434	Sarafloxacin	Drugs-Antimicrobial Agents	385.124	3.48	ESI+	386.1→342.1	50	25	386.1→299.1	80	40
435	Sparfloxacin	Drugs-Antimicrobial Agents	392.166	3.7	ESI+	393.2→349.2	40	30	393.2→292.1	30	35
436	Sulfachinoxalin	Drugs-Antimicrobial Agents	300.068	12.4783	ESI+	301.1→156	50	25	301.1→108	30	35
437	Sulfadimethoxine	Drugs-Antimicrobial Agents	310.074	12.4108	ESI+	311.1→156	60	30	311.1→92	60	47
438	Sulfanitran	Drugs-Antimicrobial Agents	335.058	12.1633	ESI-	334.1→227.1	-70	-40	334.1→180.1	-50	-45
439	Sulfaphenazole	Drugs-Antimicrobial Agents	314.084	12.2797	ESI+	315.1→158.1	50	45	315.1→160.1	40	30
440	Sulfapyrazole	Drugs-Antimicrobial Agents	328.099	12.433	ESI+	329.1→172.1	70	40	329.1→173.1	20	30
441	Sulfasalazine	Drugs-Antimicrobial Agents	398.068	13.0457	ESI+	399.1→381.1	20	30	399.1→223.1	50	40
442	Tetraconazole	Drugs-Antimicrobial Agents	371.022	15.4708	ESI+	372→159	50	40	372→150	20	40
443	Triclabendazole	Drugs-Antimicrobial Agents	357.95	17.596	ESI-	356.9→197	-40	-45	356.9→341.9	-70	-35
444	Trimethoprim	Drugs-Antimicrobial Agents	290.138	11.7637	ESI+	291.1→230.1	40	35	291.1→261.1	30	35
445	Validamycin	Drugs-Antimicrobial Agents	497.211	8.78044	ESI+	498.2→142.1	130	45	498.2→178.1	60	40
446	2-Aminoflubendazole	Drugs-Antimicrobial Agents	255.081	12.5941	ESI+	256.1→123	90	35	-	-	-
447	Chloramphenicol	Drugs-Antimicrobial Agents	322.012	12.6374	ESI-	321→121	-30	-40	-	-	-
448	Flubendazole	Drugs-Antimicrobial Agents	313.086	14.1325	ESI-	312.1→280.1	-50	-30	-	-	-
449	Lincomycin	Drugs-Antimicrobial Agents	406.214	4.43534	ESI+	407.2→126.1	40	35	-	-	-
450	Thiabendazole	Drugs-Antimicrobial Agents	201.036	12.1764	ESI+	202→175	110	35	-	-	-
451	Androstenedione	Drugs-Hormones	286.193	14.4796	ESI+	287.2→109.1	30	35	287.2→123.1	60	35
452	Chlormadinone Acetate	Drugs-Hormones	404.175	15.9058	ESI+	405.2→301.1	90	30	405.2→267.2	30	35
453	Cortisol	Drugs-Hormones	362.209	13.3715	ESI+	363.2→121.1	40	35	363.2→327.2	60	25
454	Finasteride	Drugs-Hormones	372.278	15.0502	ESI+	373.3→317.2	90	30	373.3→305.3	130	40
455	Genistein	Drugs-Hormones	270.053	12.5407	ESI-	269→133	-140	-40	269→159	-140	-40
456	Gestrinone	Drugs-Hormones	308.178	14.689	ESI+	309.2→241.2	40	35	309.2→199.1	20	45
457	Hydroxyprogesterone	Drugs-Hormones	330.219	15.011	ESI+	331.2→109.1	40	40	331.2→163.1	70	30
458	Hydroxyprogesterone caproate	Drugs-Hormones	428.293	17.7916	ESI+	429.3→271.2	50	25	429.3→253.2	80	30
459	Medroxyprogesterone acetate	Drugs-Hormones	386.246	15.961	ESI+	387.3→285.2	80	25	387.3→123.1	80	40
460	Megestrol	Drugs-Hormones	342.219	15.4103	ESI+	343.2→267.2	70	30	343.2→187.1	50	30
461	Megestrol acetate	Drugs-Hormones	384.23	15.7993	ESI+	385.2→267.2	30	25	385.2→224.2	30	35
462	Methyltestosterone	Drugs-Hormones	302.225	15.2664	ESI+	303.2→109.1	30	40	303.2→123.1	80	50
463	Norethindrone	Drugs-Hormones	298.193	14.4581	ESI+	299.2→109.1	80	35	299.2→145.1	70	30
464	Prednisolone	Drugs-Hormones	360.194	13.3725	ESI+	361.2→173.1	20	35	361.2→147.1	40	50
465	Procaterol	Drugs-Hormones	290.163	4.43088	ESI+	291.2→231.1	20	30	291.2→162.1	40	35
466	Progesterone	Drugs-Hormones	314.225	16.1317	ESI+	315.2→109.1	30	35	315.2→123.1	40	40
467	Tadalafil	Drugs-Hormones	389.138	13.7598	ESI+	390.1→268.1	20	25	390.1→135	70	30
468	Testosterone	Drugs-Hormones	288.209	14.8608	ESI+	289.2→109.1	80	35	289.2→123.1	60	35
469	Testosterone propionate	Drugs-Hormones	344.235	17.7273	ESI+	345.2→109.1	80	40	345.2→175.1	40	30
470	Estrone	Drugs-Hormones	270.162	14.9402	ESI-	269.2→145.1	-100	-53	-	-	-
471	Hexestrol	Drugs-Hormones	270.162	15.5284	ESI-	269.2→119.1	-30	-50	-	-	-
472	7-Aminoflunitrazepam	Drugs-Others	283.112	12.3746	ESI+	284.1→135.1	20	35	284.1→227.1	70	35
473	Acepromazine	Drugs-Others	326.145	13.3439	ESI+	327.2→254.1	60	35	327.2→222.1	20	55
474	Aildenafil	Drugs-Others	488.221	13.2918	ESI+	489.2→283.1	40	55	489.2→311.2	130	45
475	Amitriptyline	Drugs-Others	277.183	13.8647	ESI+	278.2→105.1	60	30	278.2→191.1	40	35
476	Amlodipine besylate	Drugs-Others	408.145	14.0845	ESI+	409.2→206	50	40	409.2→220.1	30	35
477	Benzydamine	Drugs-Others	309.184	13.3435	ESI+	310.2→265.1	40	25	310.2→174.1	40	35
478	Bromperidol	Drugs-Others	419.09	13.1519	ESI+	420.1→165.1	40	35	420.1→123	80	75
479	Buformin hydrochloride	Drugs-Others	157.133	3.51219	ESI+	158.1→116.1	20	25	158.1→141.1	40	20
480	Carbamazepine	Drugs-Others	236.095	13.3281	ESI+	237.1→194.1	100	20	237.1→179.1	60	50
481	Chlorpromazine	Drugs-Others	318.096	14.3364	ESI+	319.1→214	40	60	319.1→246	30	35
482	Clonazepam	Drugs-Others	315.041	13.3969	ESI+	316→270.1	70	35	316→214	90	50
483	Codeine	Drugs-Others	299.152	3.47493	ESI+	300.2→215.1	80	35	300.2→199.1	80	40
484	Diazepam	Drugs-Others	284.072	14.7326	ESI+	285.1→193	85	46	285.1→154.1	85	39
485	Droperidol	Drugs-Others	379.17	12.5077	ESI+	380.2→165.1	50	35	380.2→194.1	20	25
486	Fluphenazine	Drugs-Others	437.175	15.2783	ESI+	438.2→171.1	110	30	438.2→143.1	50	40
487	Gabapentin	Drugs-Others	171.126	4.2674	ESI+	172.1→137.1	20	20	172.1→119.1	20	25
488	Ganciclovir	Drugs-Others	255.097	4.65139	ESI+	256.1→152.1	20	25	256.1→135	20	45
489	Glibornuride	Drugs-Others	366.161	14.0829	ESI-	365.2→170	-20	-35	365.2→106.1	-40	-60
490	Gliclazide	Drugs-Others	323.13	14.1278	ESI+	324.1→127.1	40	25	324.1→110.1	30	30
491	Glimepiride	Drugs-Others	490.225	14.9516	ESI-	489.2→225	-50	-45	489.2→364.1	-20	-35
492	Haloperidol	Drugs-Others	375.14	13.0028	ESI+	376.1→165.1	130	35	376.1→123	40	70
493	Hydroquinidine	Drugs-Others	326.199	12.28	ESI+	327.2→309.2	60	35	327.2→160.1	90	45
494	Hydroxyhomosildenafil	Drugs-Others	504.215	14.4427	ESI-	503.2→282.1	-30	-60	503.2→475.2	-40	-40
495	Imipramine hydrochloride	Drugs-Others	280.194	13.6457	ESI+	281.2→86	65	24	281.2→58	65	65
496	Irbesartan	Drugs-Others	428.232	14.5518	ESI+	429.2→195.1	80	30	429.2→207.1	80	30
497	Metformin	Drugs-Others	129.101	4.089	ESI+	130.1→60.1	40	20	130.1→71.1	10	30
498	Minoxidil	Drugs-Others	209.128	3.2774	ESI+	210.1→164.1	30	35	210.1→110.1	20	35
499	Nicotine	Drugs-Others	162.116	3.99835	ESI+	163.1→130.1	30	30	163.1→132.1	50	20
500	Nifedipine	Drugs-Others	346.116	13.8079	ESI+	347.1→254.1	30	30	347.1→195.1	30	55
501	Nitrendipine	Drugs-Others	360.132	14.9384	ESI+	361.1→315.1	40	20	361.1→255.1	40	35
502	Norfludiazepam	Drugs-Others	288.047	14.0164	ESI+	289.1→140	70	40	289.1→226.1	50	40
503	Norharman	Drugs-Others	168.069	12.0638	ESI+	169.1→115.1	30	45	169.1→142.1	40	40
504	Noscapine	Drugs-Others	413.147	12.3188	ESI+	414.2→220.1	40	30	414.2→353.1	40	35
505	Oseltamivir	Drugs-Others	312.205	13.0396	ESI+	313.2→166.1	20	30	313.2→208.1	30	20
506	Oxarbazepine	Drugs-Others	252.09	12.8216	ESI+	253.1→180.1	40	45	253.1→208.1	40	30
507	Papaverine	Drugs-Others	339.147	12.2781	ESI+	340.2→324.1	40	40	340.2→202.1	50	40
508	Penfluridol	Drugs-Others	523.17	15.5912	ESI+	524.2→109	30	80	524.2→506.2	40	35
509	Perphenazine	Drugs-Others	403.149	14.9517	ESI+	404.2→171.1	30	30	404.2→143.1	30	40
510	Phenformin	Drugs-Others	205.133	11.99	ESI+	206.1→60.1	60	20	206.1→105.1	30	35
511	Pioglitazone hydrochloride	Drugs-Others	356.119	12.9891	ESI+	357.1→134.1	40	35	357.1→135.1	60	35
512	Prazosin hydrochloride	Drugs-Others	383.159	12.2848	ESI+	384.2→247.1	60	40	384.2→138.1	20	40
513	Pseudovardenafil	Drugs-Others	459.194	15.6455	ESI+	460.2→151.1	100	70	460.2→312.2	90	50
514	Repaglinide	Drugs-Others	452.268	16.5287	ESI+	453.3→230.2	130	50	453.3→162.1	20	30
515	Rosiglitazone maleate	Drugs-Others	357.115	12.225	ESI+	358.1→135.1	80	35	358.1→107.1	60	55
516	Sulfoaildenafil	Drugs-Others	504.198	15.1712	ESI+	505.2→299.1	40	50	505.2→327.1	90	40
517	Thebaine	Drugs-Others	311.152	12.0677	ESI+	312.2→251.1	30	40	312.2→249.1	40	25
518	Tolbutamide	Drugs-Others	270.104	12.6914	ESI-	269.1→170	-20	-28	269.1→106.1	-20	-47
519	Vardenafil	Drugs-Others	488.221	13.1577	ESI+	489.2→151.1	20	70	489.2→312.2	30	55
520	Vildagliptin	Drugs-Others	303.195	3.73124	ESI+	304.2→97.1	30	40	304.2→154.1	30	25
521	Voglibose	Drugs-Others	267.132	8.02061	ESI+	268.1→92.1	80	30	268.1→250.1	50	25
522	Dyphylline	Drugs-Others	254.102	14.6078	ESI+	255.1→181.1	50	25	-	-	-
523	Glyburide	Drugs-Others	493.144	14.617	ESI-	492.1→170	-50	-35	-	-	-
524	N-Desmethylsildenafil	Drugs-Others	460.189	14.2134	ESI-	459.2→282.1	-40	-55	-	-	-
525	Nimodipine	Drugs-Others	418.174	15.7644	ESI-	417.2→224.1	-40	-30	-	-	-
526	4,4'-Methylenebis(2-chloroaniline)	Pollutants-Dyes	266.038	14.5	ESI+	267→231.1	20	30	267→195.1	60	45
527	Acridine orange	Pollutants-Dyes	265.158	12.9566	ESI+	266.2→250.1	90	35	266.2→234.1	90	75
528	Auramine O	Pollutants-Dyes	267.174	13.0837	ESI+	268.2→147.1	50	35	268.2→252.1	70	45
529	Diphenylamine	Pollutants-Dyes	169.089	15.1599	ESI+	170.1→93.1	20	35	170.1→92	70	25
530	Ethyl 4-dimethylaminobenzoate	Pollutants-Dyes	193.11	14.8365	ESI+	194.1→134.1	20	40	194.1→151.1	20	30
531	Leucocrystal violet	Pollutants-Dyes	373.252	16.0685	ESI+	374.3→358.2	60	45	374.3→238.1	80	40
532	Michler's ketone	Pollutants-Dyes	268.158	15.4987	ESI+	269.2→148.1	140	30	269.2→120.1	60	45
533	o-Aminoazotoluene	Pollutants-Dyes	225.127	16.1651	ESI+	226.1→106.1	40	25	226.1→121.1	70	35
534	RhodamineB	Pollutants-Dyes	443.233	14.9346	ESI+	443.2→399.2	30	75	443.2→413.2	90	55
535	SudanI	Pollutants-Dyes	248.095	18.3991	ESI+	249.1→156	20	20	249.1→128	30	40
536	3,5-Dichloroaniline	Pollutants-Dyes	160.98	14.5661	ESI+	162→127	50	35	-	-	-
537	4,4'-Dichlorobenzophenone	Pollutants-Dyes	249.995	16.945	ESI+	251→139	20	25	-	-	-
538	Naphthol Yellow S	Pollutants-Dyes	313.984	3.48092	ESI-	313→233	-70	-30	-	-	-
539	Bisphenol A bis(diphenyl phosphate)	Pollutants-Organic Flame Retardants	692.173	19.5687	ESI+	710.2→693.2	30	35	710.2→367.1	20	60
540	Dibutyl phosphate	Pollutants-Organic Flame Retardants	210.102	13.1425	ESI-	209.1→153	-50	-19	209.1→79	-50	-45
541	Diphenyl phosphate	Pollutants-Organic Flame Retardants	250.039	12.8465	ESI-	249→93	-80	-45	249→155	-80	-30
542	tert-Butylphenyl diphenyl phosphate	Pollutants-Organic Flame Retardants	382.133	18.3877	ESI+	383.1→327.1	150	40	383.1→215	60	50
543	Tris(2-isopropylphenyl) phosphate	Pollutants-Organic Flame Retardants	452.212	19.6932	ESI+	453.2→327.1	60	45	453.2→369.1	100	30
544	(2-nitro-phenyl)-[1,4]benzoquinone	Pollutants-Others	344.174	12.7226	ESI+	345.2→150.1	30	30	345.2→118.1	20	45
545	2,4-Diethyl-9H-thioxanthen-9-one	Pollutants-Others	268.092	18.8121	ESI+	269.1→241.1	50	35	269.1→213	40	40
546	4,4'-Bis(diethylamino)benzophenone	Pollutants-Others	324.22	17.7086	ESI+	325.2→176.1	150	50	325.2→133.1	60	60
547	4,4'-Thiodianiline	Pollutants-Others	216.072	12.4234	ESI+	217.1→124	30	30	217.1→199	60	35
548	4-Benzoylbiphenyl	Pollutants-Others	258.104	17.3183	ESI+	259.1→105	40	30	259.1→181.1	40	30
549	Diethyltoluamide	Pollutants-Others	191.131	13.8471	ESI+	192.1→119	70	25	192.1→91.1	50	45
550	Iminoctadinetris	Pollutants-Others	355.342	7.29062	ESI+	356.3→297.3	30	40	356.3→314.3	10	30
551	Leucomalachite green	Pollutants-Others	330.21	17.3038	ESI+	331.2→239.2	60	45	331.2→316.2	40	30
552	Mono(2-ethyl-5-oxohexyl)phthalate	Pollutants-Others	292.131	12.5461	ESI-	291.1→77.1	-98	-40	291.1→121.1	-98	-22
553	Monoethyl phthalate	Pollutants-Others	194.058	12.7086	ESI+	195.1→149	40	25	195.1→121	20	40
554	morpholinopropiophenone	Pollutants-Others	279.129	14.1892	ESI+	280.1→165.1	40	30	280.1→117.1	30	50
555	MQCA	Pollutants-Others	188.059	3.76597	ESI+	189.1→143.1	20	25	189.1→102	20	45
556	Benzyl 4-hydroxybenzoate	Pollutants-Others	228.079	14.8589	ESI-	227.1→136	-30	-20	-	-	-
557	Bis(2-butoxyethyl) phthalate	Pollutants-Others	366.204	17.0835	ESI+	367.2→101.1	50	20	-	-	-
558	Blasticidine S	Pollutants-Others	422.203	8.78692	ESI+	423.2→312.2	60	25	-	-	-
559	1H,1H,2H,2H-Perfluorodecanesulfonic acid	Pollutants-PFASs	527.969	17.0478	ESI-	527→507	-50	-35	527→486.9	-50	-45
560	1H,1H,2H,2H-Perfluorohexanesulfonic acid	Pollutants-PFASs	327.982	13.5993	ESI-	327→307	-50	-25	327→287	-40	-35
561	Bis[2-(perfluorohexyl)ethyl] phosphate	Pollutants-PFASs	789.982	19.0959	ESI-	789→443	-20	-31	789→97	-20	-76
562	Chloro-3-oxa-perfluorononanesulfonic acid	Pollutants-PFASs	531.903	16.7129	ESI-	530.9→350.9	-60	-37	530.9→35	-60	-90
563	Fenpiclonil	Pollutants-PFASs	235.991	14.2217	ESI+	237→202	70	30	237→201	40	25
564	Pentacosafluorotridecanoic acid	Pollutants-PFASs	663.958	18.748	ESI-	663→169	-50	-30	663→219	-30	-30
565	Perfluorobutanesulfonic acid	Pollutants-PFASs	299.95	12.9701	ESI-	298.9→169	-60	-30	298.9→119	-70	-30
566	Perfluorodecanoic acid	Pollutants-PFASs	513.967	17.0308	ESI-	513→219	-20	-25	513→269	-30	-25
567	Perfluorododecanoic acid	Pollutants-PFASs	613.961	18.2526	ESI-	613→269	-30	-30	613→169	-30	-40
568	Perfluoroheptanesulfonic acid	Pollutants-PFASs	449.941	15.5012	ESI-	448.9→169	-120	-45	448.9→119	-100	-45
569	Perfluoroheptanoic acid	Pollutants-PFASs	363.977	14.5237	ESI-	363→169	-30	-25	363→119	-20	-40
570	Perfluorohexanesulfonate (PFHxS)	Pollutants-PFASs	399.944	14.5986	ESI-	398.9→80	-50	-85	398.9→99	-50	-65
571	Perfluorononanesulfonic acid sodium	Pollutants-PFASs	549.934	17.0412	ESI-	548.9→80	-110	-115	548.9→99	-110	-100
572	Perfluorononanoic acid	Pollutants-PFASs	463.971	16.285	ESI-	463→219	-60	-25	463→169	-20	-30
573	Perfluorooctanesulfonate (PFOS)	Pollutants-PFASs	499.937	16.3197	ESI-	498.9→80.1	-100	-100	498.9→99	-100	-80
574	Perfluorooctanoic acid	Pollutants-PFASs	413.974	15.45	ESI-	413→169	-20	-25	413→219	-40	-20
575	Perfluorotetradecanoic acid	Pollutants-PFASs	713.955	19.1864	ESI-	712.9→219	-20	-35	712.9→319	-30	-30
576	Perfluoroundecanoic acid	Pollutants-PFASs	563.964	17.6802	ESI-	563→269	-20	-25	563→169	-40	-30
577	PFHxA	Pollutants-PFASs	313.98	13.646	ESI-	313→269	-50	-13	313→119	-50	-28
578	perfluoro-n-pentanoic acid-1 (PFPeA)	Pollutants-PFASs	263.983	12.9541	ESI-	263→219	-50	-12	-	-	-
579	Bisphenol AF	Pollutants-Phenols	336.058	15.4059	ESI-	335.1→265	-60	-30	335.1→197	-60	-50
580	Bisphenol M	Pollutants-Phenols	346.193	17.7247	ESI-	345.2→330	-140	-37	345.2→133	-140	-50
581	Bisphenol S	Pollutants-Phenols	250.03	11.996	ESI-	249→108	-100	-37	249→156	-100	-37
582	4,6-Dinitro-O-cresol	Pollutants-Phenols	198.028	12.2403	ESI-	197→109	-30	-30	-	-	-
583	Bis(4-hydroxyphenyl)methane	Pollutants-Phenols	200.084	13.2246	ESI-	199.1→93	-80	-29	-	-	-
584	Bisphenol AP	Pollutants-Phenols	290.131	15.4758	ESI-	289.1→274.1	-90	-30	-	-	-
585	Dinoseb	Pollutants-Phenols	240.075	13.6589	ESI-	239.1→207	-50	-35	-	-	-
586	2,2’,4,4’-Tetrahydroxybenzophenone	Pollutants-UV Absorbers	246.053	12.2981	ESI-	245→135	-20	-20	245→109	-20	-30
587	2,2'-Dihydroxy-4,4'-dimethoxybenzophenone	Pollutants-UV Absorbers	274.084	15.242	ESI+	275.1→151	20	25	275.1→108	40	60
588	2-Ethylhexyl 4-(dimethylamino)benzoate	Pollutants-UV Absorbers	277.204	19.002	ESI+	278.2→166.1	60	30	278.2→151.1	60	40
589	2-Hydroxy-4-methoxybenzophenone	Pollutants-UV Absorbers	228.079	15.6364	ESI+	229.1→151	30	25	229.1→105	40	25
590	2-Hydroxy-4-methoxybenzophenone-5-sulfonic acid	Pollutants-UV Absorbers	308.035	12.4761	ESI-	307→211	-80	-50	307→227.1	-90	-30
591	3-(4-Methylbenzylidene)camphor	Pollutants-UV Absorbers	254.167	17.8174	ESI+	255.2→212.1	30	30	255.2→105.1	30	40
592	4-Isopropylthioxanthone	Pollutants-UV Absorbers	254.077	17.9756	ESI+	255.1→213	30	30	255.1→184	40	55
593	Benzophenone	Pollutants-UV Absorbers	182.073	14.6806	ESI+	183.1→105	20	20	183.1→77	30	40
594	Butyl methoxydibenzoylmethane	Pollutants-UV Absorbers	310.157	19.0925	ESI+	311.2→161.1	40	35	311.2→135	40	35
595	Heptyl 4-hydroxybenzoate	Pollutants-UV Absorbers	236.141	17.7383	ESI-	235.1→136	-30	-25	235.1→137	-30	-25
596	2,4-Dihydroxybenzophenone	Pollutants-UV Absorbers	214.063	13.2788	ESI-	213.1→135	-40	-25	-	-	-
597	3,5-Di-tert-butyl-4-hydroxybenzyl alcohol	Pollutants-UV Absorbers	236.178	16.1642	ESI-	235.2→160.1	-50	-35	-	-	-
598	Dioxybenzone	Pollutants-UV Absorbers	244.074	14.8672	ESI-	243.1→108	-30	-45	-	-	-

## Sheet: Fig.4
Figure 4a																	Figure 4b						Figure 4c						Figure 4d and 4e				Figure 4f
Serum					Tissue					Urine							Name	tR-2DLC	tR-RPLC	tR-HILIC			RPLC lost		HILIC lost				S/N average	log P			Exposure-TQMS				Exposure-HRMS				Metabolite-HRMS
Name	tR-2DLC	tR-RPLC	tR-HILIC	Anatation Level	Name	tR-2DLC	tR-RPLC	tR-HILIC	Anatation Level	Name	tR-2DLC	tR-RPLC	tR-HILIC	Anatation Level			(S)-2-hydroxy-3-(1H-imidazol-4-yl)propanoic acid	8.01184		8.89662			tR-2DLC	log P	tR-2DLC	log P				-2.1226			Exposure	LOD-TQMS	log LOD-TQMS	Comulative percent	Exposure	LOD-HRMS	log LOD-HRMS	Comulative percent	Metabolite	log LOD-HRMS	log LOD-HRMS	Comulative percent
3-Chlorobenzoic acid	12.07	5.39	1.30015	level1	Quinic acid	4.73855	2.1	6.8462	level1	(S)-2-hydroxy-3-(1H-imidazol-4-yl)propanoic acid	8.096	0.824722	8.92709	level1			L-Cysteinesulfinic acid monohydrate	8.26768		9.2245			7.73837	-15.2057	12.932	-4.2719				-1.7464			Metalaxyl	1e-06	-6	0.161031	Diethyltoluamide	0.0001	-4	0.161031	Creatinine	4.51955e-05	-4.3449	0.328947
1-HYDROXY-2-NAPHTHOATE	3.80968		1.38217	level1	(S)-2-hydroxy-3-(1H-imidazol-4-yl)propanoic acid	8.14254		9.02591	level1	D-glucosamine-6-phosphate	8.71606		9.54	level1			glucuronic acid	8.11371		9.14674			9.32826	-8.5989	8.00446	-4.1322				-1.5205			Phosfolan	1e-06	-6	0.322061	Tralkoxidym	0.0001	-4	0.322061	tricarballylic acid (1,2,3-Propanetricarboxylic acid)	0.0001	-4	0.657895
3-Hydroxydecanoic acid	13.7	10.84	1.3907	level1	L-Cysteinesulfinic acid monohydrate	8.25457		9.23	level1	1-Methylhistamine dihydrochloride	5.92208	0.674591	7.28974	level1			Isoleucine	4.69086	1.40067	7.13323			8.11371	-8.4419	4.522	-2.5823				-1.4222			Pirimicarb	1e-06	-6	0.483092	Atrazine	0.0001	-4	0.483092	carnitine C4:0	0.000231004	-3.63638	0.986842
sebacic acid	10.42	3.04	1.40348	level1	D-glucosamine-6-phosphate	9.02134		9.51832	level1	2-Aminooctanoic acid	4.08918	6.01147	6.14927	level1			PYRUVIC ALDEHYDE	6.87849		8.24283			8.66438	-8.1377	6.41711	-1.9266			118.35	-1.1656			Azoxystrobin	1e-06	-6	0.644122	Carbofuran	0.0001	-4	0.644122	O-acetyl-L-serine	0.000249501	-3.60293	1.31579
azelaic acid	10.1658	1.38	1.43521	level1	glucuronic acid	8.10539	0.93358	9.15	level1	Tryptophan betaine	3.94499	3.777	5.55287	level1			2-Aminooctanoic acid	4.25044		6.07196			7.96803	-5.3972	4.333	-1.736			686.87	-1.1254			Benalaxyl	1e-06	-6	0.805153	Desethylsebutylazine	0.0001	-4	0.805153	Trigonelline	0.000249501	-3.60293	1.64474
Biliverdin	13.8179	11.68	2.10421	level1	Phytosphingosine	20.2389	17.59		level1	tryptamine		4.16749		level1			Tryptophan betaine	3.90968	3.76615	5.55078			7.38456	-5.3956	4.788	-1.6579			198.11	-1.0342			Coumaphos	1e-06	-6	0.966184	Desmetryn	0.0001	-4	0.966184	Arginine	0.000278579	-3.55505	1.97368
Indole-3-lactic acid	11.614	4.23	2.18022	level1	p-aminobenzoic acid	5.24767		7.37057	level1	1-Hexadecanoyl-sn-glycero-3-phosphocholine	19.4678	16.7303		level1			1-Hexadecanoyl-sn-glycero-3-phosphocholine	19.4989	16.7755	5.7537			7.80678	-5.3956	4.8	-1.5758			127.39	-0.7313			Dimethenamid	1e-06	-6	1.12721	Dimethirimol	0.0001	-4	1.12721	carnitine C12:0	0.00034306	-3.46463	2.30263
3-Hydroxyglutaric Acid	4.34136	0.7	2.27075	level1	Tryptophan betaine	3.92616	3.72289	5.59749	level1	Spermidine	9.12		10.1315	level1			Spermidine	9.07424		10.0617			12.932	-4.2719	8.881	-1.3676			154.22	-0.5802			Enestroburin	1e-06	-6	1.28824	Fenfuram	0.0001	-4	1.28824	carnitine C16:0	0.000399087	-3.39893	2.63158
Cholic acid	15.7266	13.71	2.34107	level1	1-Hexadecanoyl-sn-glycero-3-phosphocholine	19.3603	16.7026	5.55611	level1	N-Methylacetoacetamide	8.68959		9.49861	level1			3-Hydroxymyristic Acid	17.4681	14.8				8.00446	-4.1322	8.5	-1.3589			178.85	-0.3251			Fenamiphos sulfone	1e-06	-6	1.44928	Metalaxyl	0.0001	-4	1.44928	Carnitine-C2:0	0.000406232	-3.39123	2.96053
cinnamoylglycine	12.1992	6.48	2.44709	level1	Spermidine	9.11606	0.629135	10.0641	level1	Riboflavin	4.22187	5.82288	6.09227	level1			N-Methylacetoacetamide	8.68688		9.54795			7.728	-3.8346	7.904	-1.3259			126.1	-0.0101			Fenamiphos	1e-06	-6	1.61031	Phosfolan	0.0001	-4	1.61031	D-glucosamine-6-phosphate	0.000499002	-3.3019	3.28947
3-hydroxyhippuric acid	10.39	4.32	2.44719	level1	N-Methylacetoacetamide	8.55936	0.67442	9.48815	level1	3-METHOXYTYRAMINE			5.25161	level1			Desmosterol	21.4848	17.7738				5.25876	-3.5854	3.705	-1.2934			66.68	0.1217			Fenpyroximate	1e-06	-6	1.77134	Pyraclostrobin	0.0001	-4	1.77134	Car C10:0	0.000499002	-3.3019	3.61842
2-hydroxyisobutyric acid	10.35	0.85	2.63226	level1	Riboflavin	4.1777	5.83431	6.08918	level1	ALLOTHREONINE	7.47211	0.902972	8.17006	level1			Glycerophosphoric acid	8.07534		8.95612			7.63982	-3.5201	8.88	-1.2644			78.21	0.232			Flumorph	1e-06	-6	1.93237	Pyriproxyfen	0.0001	-4	1.93237	Car C3:0	0.000499002	-3.3019	3.94737
4-Pyridoxic acid			2.73978	level1	Desmosterol	21.4864	17.4058		level1	prostaglandin D2	13.7661	11.6164		level1			ALLOTHREONINE	7.3022		8.19745			7.55372	-3.5171	3.919	-1.2636			307.61	0.2861			Fluopyram	1e-06	-6	2.0934	Simazine	0.0001	-4	2.0934	Car C5:0	0.000499002	-3.3019	4.27632
hippuric acid	11.4802	3.76596	3.1198	level1	Glycerophosphoric acid	8.19502	0.696407	9.20349	level1	Cholic acid	16.9705	14.3779		level1			D(+)-Melibiose monohydrate, 99+%	7.96803		8.94399			7.66273	-3.4931	9.502	-1.2485			136.99	0.3259			Fluphenazine	1e-06	-6	2.25443	Simetryn	0.0001	-4	2.25443	N-oleoylethanolamine	0.0005	-3.30103	4.60526
Car C18:1	19.2215	16.5676	3.30153	level1	ALLOTHREONINE	7.56879	0.930292	8.39177	level1	D-sorbose	4.75679		7.78921	level1			azelaic acid	10.1658	1.38	1.43521			8.11371	-3.2865	4.753	-1.0934			197.45	0.3445			Fluridone	1e-06	-6	2.41546	3,4,5-Trimethylphenyl methylcarbamate	0.0005	-3.30103	2.41546	sebacic acid	0.0005	-3.30103	4.93421
20-Hydroxycholesterol	19.1095	16.4046	3.35844	level1	Nadide	8.71383	0.801779	9.63621	level1	Benzocaine	13.117	9.81915		level1			prostaglandin D2	13.7516					8.854	-3.1977	13.357	-1.0054			76.44	0.3457			Flurtamone	1e-06	-6	2.57649	Moroxydine	0.0005	-3.30103	2.57649	Carnitine-C6:0	0.000647946	-3.18846	5.26316
Epoxycholesterol	19.1095	16.4046	3.35844	level1	Imipramine hydrochloride		10.7131		level1	S-Glutathionyl-L-cysteine	8.95856		9.97	level1			Cholic acid	15.7266	13.71	2.34107			7.958	-3.1889	4.91579	-1.0007				0.3815			Flusilazole	1e-06	-6	2.73752	Pirimicarb	0.0005	-3.30103	2.73752	(-)-Anabasine	0.000648061	-3.18838	5.59211
Car C16:0	18.9865	16.3823	3.47194	level1	Cholic acid	16.9526	14.3221		level1	guanidineacetic acid（晓琳姐母液）	7.00796	0.740833	8.33731	level1			TCDCA	16.5011	14.46	5.5315			7.04697	-3.1537	10.4327	-0.9792			286.17	0.394			Imipramine hydrochloride	1e-06	-6	2.89855	(E)-Dimethomorph	0.0005	-3.30103	2.89855	FFA 13:0	0.000856242	-3.0674	5.92105
Calcium pantothenate	10.4594	1.8	3.56744	level1	Tauroursodeoxycholic acid	3.64705	11.8	5.29059	level1	1-Methyl-L-histidine	8.02789	0.786812	8.83694	level1			D-sorbose	4.7473	1.0158	7.85155			8.11371	-3.1291	7.409	-0.9602			119.28	0.4938			Mephosfolan	1e-06	-6	3.05958	2-Ethylhexyl 4-(dimethylamino)benzoate	0.0005	-3.30103	3.05958	Pro-Leu	0.000912024	-3.03999	6.25
Urocanic acid			3.63561	level1	trans-11-Eicosenoic acid	20.4332	18.1767		level1	Benzylideneacetone	13.4947	9.74943		level1			Benzocaine	12.7571	7.6036				7.914	-3.0315	4.65517	-0.9496				0.5075			Penthiopyrad	1e-06	-6	3.22061	3-(4-Methylbenzylidene)camphor	0.0005	-3.30103	3.22061	Tryptophan betaine	0.000923013	-3.03479	6.57895
HOMOVANILLATE	10.38	1.59879	3.74734	level1	Benzocaine	12.7508	9.74293		level1	1-Dodecanoyl-sn-glycero-3-phosphocholine	17.008	14.6055	5.71941	level1			guanidineacetic acid（晓琳姐母液）	7.3234		8.15128			4.72288	-2.9756	14.552	-0.9371			147.02	0.5664			Phosphamidon	1e-06	-6	3.38164	4,4'-Bis(diethylamino)benzophenone	0.0005	-3.30103	3.38164	3-Hydroxymyristic Acid	0.00097621	-3.01046	6.90789
N-Formylmethionine	3.73821	2	4.01791	level1	S-Glutathionyl-L-cysteine	8.99206	0.714626	9.92094	level1	2-hydroxyisobutyric acid	3.67	0.674029		level1			1-Methyl-L-histidine	8.00995		8.80706			5.02271	-2.9463	5.59238	-0.7763			84.19	0.575			Tebuthiuron	1e-06	-6	3.54267	4-Isopropylthioxanthone	0.0005	-3.30103	3.54267	Car C18:1	0.000998004	-3.00087	7.23684
Car C10:0	14.9164	12.3899	4.1348	level1	n-Oleoylethanolamine	20.9993	18.3444		level1	N-Acetyl-L-tyrosine	3.70602	2.7455	4.92414	level1			1-Dodecanoyl-sn-glycero-3-phosphocholine	3.88166	14.5831	5.68878			8.022	-2.7576	8.038	-0.7355			332.56	0.6862			Thiacloprid	1e-06	-6	3.7037	7-Aminoflunitrazepam	0.0005	-3.30103	3.7037	azelaic acid	0.001	-3	7.56579
1,3-Dimethyluric acid		4.19	4.26831	level1	guanidineacetic acid（晓琳姐母液）	7.29332	0.794428	8.18001	level1	N-Acetyl-L-phenylalanine	11.8413	5.06919	2.66703	level1			2-hydroxyisobutyric acid	10.35		2.63226			6.142	-2.7397	4.685	-0.7033			150.94	0.6893			Triazophos	1e-06	-6	3.86473	Acetamiprid	0.0005	-3.30103	3.86473	2-oxoadipic acid	0.001	-3	7.89474
Car C8:0	13.2174	9.84827	4.53684	level1	Thr-Leu	5.05	3.47886	7.71	level1	Vanillylmandelic acid	3.66397	0.875655	4.63548	level1			1,2-Dimyristoyl-sn-glycero-3-phosphocholine	22.0828	18.9963				8.31198	-2.7212	4.01	-0.5996				0.7034			Droperidol	1e-06	-6	4.02576	Albendazole	0.0005	-3.30103	4.02576	urocanic acid	0.001	-3	8.22368
2-(2-Benzylphenoxy)-N,N,N-trimethylethan-1-aminium iodide	13.2174	9.91	4.53684	level1	1-Methyl-L-histidine	7.89533		8.91907	level1	Asp-Glu	8.49784	0.799006	9.43715	level1			Aspartic acid	8.26404		9.11233			4.84	-2.6867	3.79	-0.5482			100.02	0.738			Ethametsulfuron-methyl	1e-06	-6	4.1868	Alprenolol	0.0005	-3.30103	4.1868	1-methylguanine	0.001	-3	8.55263
DIPALMITOYL-PHOSPHATIDYLCHOLINE	23.4864	19.6309	4.72835	level1	2-hydroxyisobutyric acid		0.824847	2.46556	level1	Aspartic acid	8.25342		9.1309	level1			Phenylalanine	4.70563	2.50259	7.10485			4.673	-2.6013	16.873	-0.4767			285.25	0.796			Fosthiazate	1e-06	-6	4.34783	Ametoctradin	0.0005	-3.30103	4.34783	dodecanedioic acid	0.001	-3	8.88158
Car C6:0	3.76	6.59	4.76285	level1	ETHYL 3-UREIDOPROPIONATE	7.22575		8.48801	level1	Naproxen	14.547			level1			Carnosine	8.37721		9.26002			6.142	-2.5823	3.93604	-0.4433			60	0.8152			Metsulfuron-methyl	1e-06	-6	4.50886	Amitriptyline	0.0005	-3.30103	4.50886	16-dehydroprogesterone	0.001	-3	9.21053
Concanavalin A	3.9269	1.76999	4.77891	level1	1,2-Dimyristoyl-sn-glycero-3-phosphocholine	22.1558	19.0181		level1	Phenylalanine	4.83633	3.34696	6.87857	level1			CREATINE	7.04439		7.98302			4.522	-2.5823	4.64	-0.4035			2334.09	0.8682			Spinetoram	1e-06	-6	4.66989	Anilofos	0.0005	-3.30103	4.66989	phenyl-glucuronide	0.001	-3	9.53947
Creatinine	3.90741	0.828486	4.8	level1	Asp-Glu	8.53955	0.64971	9.42323	level1	Carnosine	8.64988		9.43903	level1			Alanylglycine	7.55372		8.72708			7.75587	-2.551	4.891	-0.357			186.82	0.8736			Spinosyn A	1e-06	-6	4.83092	Atraton	0.0005	-3.30103	4.83092	daldzein	0.001	-3	9.86842
5-Aminolevulinic acid hydrochloride	3.88	0.86	4.85268	level1	Aspartic acid	8.18634	0.716367	9.11113	level1	CREATINE	7.22894	0.850107	8.10304	level1			sebacic acid	10.42	3.04	1.40348			4.91413	-2.4386	4.821	-0.3114			707.35	0.8768			Spinosyn D	1e-06	-6	4.99195	Aziprotryne	0.0005	-3.30103	4.99195	Lysine	0.00116812	-2.93251	10.1974
GCDCA	16.9175	14.2764	4.8557	level1	Phenylalanine	4.98004	3.34881	6.8186	level1	Neochlorogenic acid	4.42514	3.37545	6.8192	level1			Car C8:0	13.2174	9.84827	4.53684			7.468	-2.3392	8.365	-0.212			92.46	0.962			Flufenoxuron	1e-06	-6	5.15298	Azoxystrobin	0.0005	-3.30103	5.15298	N-Methyl-D-aspartic acid	0.0011757	-2.9297	10.5263
GDCA	16.8638	14.2764	4.8557	level1	Carnosine	8.58159		9.43839	level1	Alanylglycine	7.78659		8.67514	level1			Sucrose	7.38456		8.43996			4.36199	-2.2689	10.36	-0.203			106.61	0.965			Flubendiamide	1e-06	-6	5.31401	Benalaxyl	0.0005	-3.30103	5.31401	N-Acetyl-DL-serine	0.0011757	-2.9297	10.8553
Adenosine	3.9269	1.76999	4.90519	level1	CREATINE	6.99708	0.748533	8.09976	level1	Car C8:0	13.323	9.92704	4.59216	level1			L-Theanine	6.44745		7.84759			4.20996	-2.2272	12.769	-0.0274			210.45	1.0069			Bisphenol C	1e-06	-6	5.47504	Benzydamine	0.0005	-3.30103	5.47504	Glutamic acid	0.0011757	-2.9297	11.1842
Uridine	3.92342	1.9	4.99	level1	sebacic acid	10.3295		1.36	level1	Sucrose	7.40846		8.44805	level1			Creatinine	3.90741		4.8			6.56316	-2.2149	4.85571	-0.017			53.18	1.0248			Carbofuran	5e-06	-5.30103	5.63607	Betaxolol	0.0005	-3.30103	5.63607	Hypoxanthine	0.0012475	-2.90396	11.5132
Hydroxyproline	3.9	0.86	5.10909	level1	NICOTINAMIDE MONONUCLEOTIDE	8.39751	0.802846	9.36537	level1	GLYCEROL-MYRISTATE	19.5	16.947		level1			beta-Glycerophosphate disodium salt hydrate	8.07534		9.01			8.774	-2.1985	6.087	-0.0143			63.74	1.2047			Desethylsebutylazine	5e-06	-5.30103	5.7971	Bisoprolol	0.0005	-3.30103	5.7971	Proline	0.0012475	-2.90396	11.8421
Hypoxanthine	4.04598	1.03822	5.17124	level1	Creatinine	3.94638	0.77	4.70583	level1	Creatinine	4.11602	0.810114	5.16043	level1			PREGNENOLONE SULFATE	15.2662	12.94				4.08288	-2.1798	6.839	0.0174			153.24	1.2598			Desmetryn	5e-06	-5.30103	5.95813	Buformin hydrochloride	0.0005	-3.30103	5.95813	Phenylalanine	0.00131981	-2.87949	12.1711
N-(dodecanoyl)-sphing-4-enine-1-phosphocholine	21.5376	18.6238	5.25662	level1	D-alanyl-D-alanine	7.41631	0.893251	8.28053	level1	D-alanyl-D-alanine	7.43515		8.3467	level1			Erucic acid	21.6325	18.55				5.73334	-2.1392	4.72	0.1298				1.3306			Dimethirimol	5e-06	-5.30103	6.11916	Bupirimate	0.0005	-3.30103	6.11916	Cytosine	0.00138527	-2.85847	12.5
Car C5:0	3.86	4.62	5.30654	level1	Disodium uridine-5'-monophosphate	8.17239	0.799686	9.05994	level1	beta-Glycerophosphate disodium salt hydrate	8.10716		8.98591	level1			Calendic acid	18.741	16.12				6.659	-2.1232	12.071	0.1697			425.09	1.3749			Fenfuram	5e-06	-5.30103	6.28019	Buprofezin	0.0005	-3.30103	6.28019	Testosterone	0.00144015	-2.84159	12.8289
1-Nonadecanoyl-sn-glycero-3-phosphocholine	20.4846	17.819	5.34734	level1	Glycyl-L-leucine	4.94098	3.18828	7.81654	level1	Glycyl-L-leucine		3.26568		level1			Uridine	3.92342	1.9	4.99			8.836	-2.0712	3.84	0.2066			321.53	1.3848			Pyraclostrobin	5e-06	-5.30103	6.44122	Buturon	0.0005	-3.30103	6.44122	Sphingosine	0.00149548	-2.82522	13.1579
1-Octadecanoyl-sn-glycero-3-phosphocholine	20.1264	17.5721	5.41737	level1	Erucic acid	21.5748	18.4278		level1	6-O-(alpha-D-Galactopyranosyl)-D-glucopyranose	8.18228		8.93038	level1			N6-Acetyl-L-lysine	7.07668		8.02635			4.22	-2.0326	11.21	0.2213			134.83	1.442			Pyriproxyfen	5e-06	-5.30103	6.60225	Cadusafos	0.0005	-3.30103	6.60225	Leucine	0.00196642	-2.70632	13.4868
1-O-Octadecyl-SN-glycero-3-phosphocholine	20.5967	17.8564	5.47527	level1	Calendic acid	18.6718	16.1292		level1	N6-Acetyl-L-lysine	7.14849	0.926532	8.13713	level1			5-Hydroxyindole-3-acetic acid	4.71	2.16857	6.8			4.68887	-1.9582	4.436	0.2574			90.37	1.4761			Ametoctradin	5e-06	-5.30103	6.76329	Carbamazepine	0.0005	-3.30103	6.76329	Pseudouridine	0.00199601	-2.69984	13.8158
TCDCA	16.5011	14.46	5.5315	level1	Uridine	3.88945	1.90638	4.8566	level1	phenylacetaldehyde苯乙醛	3.94		5.6153	level1			Lanthionine	8.85		9.76609			8.35938	-1.8713	20	0.3675			84.19	1.4854			Anilofos	5e-06	-5.30103	6.92432	Chlorotoluron	0.0005	-3.30103	6.92432	Leucylproline	0.00199601	-2.69984	14.1447
Tryptophan betaine	3.90968	3.76615	5.55078	level1	N6-Acetyl-L-lysine	7.19719	1.12078	8.23	level1	Lanthionine	8.78342		9.76214	level1			Calcium pantothenate	10.4594	1.8	3.56744			7.90788	-1.8123	8.038	0.3738			456.68	1.4962			Bisoprolol	5e-06	-5.30103	7.08535	Chloroxuron	0.0005	-3.30103	7.08535	Symmetric dimethylarginine	0.00202143	-2.69434	14.4737
1-O-Hexadecyl-sn-glycero-3-phosphocholine	19.8844	17.1457	5.63362	level1	5-Hydroxyindole-3-acetic acid	4.73		6.81496	level1	N-Acetyl-D-tryptophan	11.7937	5.3576	2.82822	level1			Tetradecanoic acid, (2R)-2-hydroxy-3-(phosphonooxy)propyl ester, sodium salt	3.72727		5.81672			4.99567	-1.8065	6.743	0.4196				1.5281			Bupirimate	5e-06	-5.30103	7.24638	Chlorpromazine	0.0005	-3.30103	7.24638	Calendic acid	0.00208252	-2.68141	14.8026
Phe-Trp	3.99159	7.1848	5.67431	level1	Methyl linolenate	20.4251	17.5724		level1	Calcium pantothenate	10.3685	1.86791	3.56938	level1			Mannitol	5.25876		7.85438			4.333	-1.736	4.479	0.6315			52.23	1.5451			Buprofezin	5e-06	-5.30103	7.40741	Coumaphos	0.0005	-3.30103	7.40741	Linoleic acid	0.00209761	-2.67828	15.1316
xanthine	4.01283		5.68591	level1	Lanthionine	8.80429		9.79268	level1	Mannitol	5.04294	0.807162	7.83265	level1			Hypoxanthine	4.04598	1.03822	5.17124			8.44	-1.6684	12.674	0.6916			128.89	1.7022			Carbamazepine	5e-06	-5.30103	7.56844	Cyflufenamid	0.0005	-3.30103	7.56844	carnitine C18:0	0.00213551	-2.6705	15.4605
1-Dodecanoyl-sn-glycero-3-phosphocholine	3.88166	14.5831	5.68878	level1	N-Acetyl-D-tryptophan	11.8426	5.32158	2.73181	level1	Methyl gallate		5.11784		level1			TARTRATE			9.29242			4.788	-1.6579	3.67	0.7115			89.1	2.1641			Cyproheptadine	5e-06	-5.30103	7.72947	Cyprodinil	0.0005	-3.30103	7.72947	1-Methyladenosine	0.00224751	-2.6483	15.7895
Car C4:0	4.02	3.17739	5.69886	level1	Calcium pantothenate	10.3853	1.9313	3.45308	level1	XANTHURENATE	4.29784	3.83222	6.59129	level1			Methionine	5.00209		7.41201			4.52185	-1.6558	11.43	0.7144			118.07	2.2774			Dimethachlor	5e-06	-5.30103	7.8905	Cyproheptadine	0.0005	-3.30103	7.8905	Myristoleic acid	0.00225742	-2.64639	16.1184
ALLANTOIN	4.08288		5.72734	level1	Mannitol	5.02921	0.803287	7.77735	level1	Hypoxanthine	3.76691	1.07017	5.09426	level1			Orotidine	7.04697		8.12916			7.3234	-1.6556	3.886	0.7599			190.58	2.3472			Dimethametryn	5e-06	-5.30103	8.05153	Cyromazine	0.0005	-3.30103	8.05153	inosine	0.00243014	-2.61437	16.4474
LPE 18:1	19.6087	16.9394	5.74862	level1	Hypoxanthine	4.05291	0.891955	4.98171	level1	TARTRATE	8.1661		9.24801	level1			Car C18:0	19.8556	17.1516				7.69831	-1.6094	3.84	0.7814				2.3681			Diphenamid	5e-06	-5.30103	8.21256	Diazepam	0.0005	-3.30103	8.21256	17α-Hydroxyprogesterone	0.00247665	-2.60614	16.7763
1-Hexadecanoyl-sn-glycero-3-phosphocholine	19.4989	16.7755	5.7537	level1	N,N-dimethylglycine	5.98406	0.79	7.7322	level1	Methionine	5.02675	0.956307	7.33695	level1			Sarcosine	6.87849	1.43512	7.998			4.8	-1.5758	12.827	0.7853				2.3681			Disulfoton-sulfoxide	5e-06	-5.30103	8.37359	Diazinon	0.0005	-3.30103	8.37359	12-Hydroxyeicosatetraenoic acid	0.00249501	-2.60293	17.1053
1-Palmitoyl-2-hydroxy-SN-glycero-3-phosphate(sodium salt)	3.70884	16.78	5.75862	level1	Methionine	5.04301	0.95964	7.48892	level1	OXOADIPATE	4.53586	0.857988		level1			Car C12:0	16.6019	14.0365				4.871	-1.5575	4.824	0.7894			244.91	2.558			Diuron	5e-06	-5.30103	8.53462	Dimethachlor	0.0005	-3.30103	8.53462	Taurodeoxycholic acid	0.00249501	-2.60293	17.4342
Phe-Phe	3.99559	7.29058	5.78833	level1	1-Methylhistamine dihydrochloride	6.16992	0.678446	7.29971	level1	Orotidine	7.01622	0.771154	8.08485	level1			3-Hydroxydecanoic acid	13.7	10.84	1.3907			8.07534	-1.5511	4.857	0.8215			76.22	2.5886			Epoxiconazole	5e-06	-5.30103	8.69565	Dimethametryn	0.0005	-3.30103	8.69565	Adenine	0.00249501	-2.60293	17.7632
Tetradecanoic acid, (2R)-2-hydroxy-3-(phosphonooxy)propyl ester, sodium salt	3.72727		5.81672	level1	Orotidine	6.98122		8.12783	level1	D-Ribose 5-phosphate disodium salt dihydrate	8.15688		9.18045	level1			METHYL JASMONATE	14.8671	11.6278				8.07534	-1.5511	4.908	0.9192			124.27	2.6083			Etoxazole	5e-06	-5.30103	8.85668	Dimethenamid	0.0005	-3.30103	8.85668	Betaine	0.00249501	-2.60293	18.0921
2'-O-Methylguanosine	4.22		5.821	level1	Ethyl linoleate	21.0578	18.1794		level1	N-Heptanoyl-DL-homoserine lactone	13.3557	10.3109		level1			1-Methyladenosine	5.73334		7.31087			4.69685	-1.4847	4.42	0.9721			238.37	2.8125			Fenamidone	5e-06	-5.30103	9.01771	Dimoxystrobin	0.0005	-3.30103	9.01771	L-Malic acid	0.00267508	-2.57266	18.4211
Serotonin	4.13967	1.69919	5.86076	level1	Car C18:0	19.8379	17.2034		level1	Naringetol	12.3014	8.58656	1.1164	level1			Ornithine	8.70363		9.54795			8.85	-1.4566	14.017	1.1618			136.38	2.8326			Fenaminostrobin	5e-06	-5.30103	9.17874	Diniconazole	0.0005	-3.30103	9.17874	Propylparaben	0.00270118	-2.56845	18.75
5-methylcytosine	4.24505		5.93	level1	D-Ribose 5-phosphate disodium salt dihydrate	8.38102	0.637576	9.08914	level1	Liquiritigenin	12.2475	8.30337		level1			GCDCA	16.9175	14.2764	4.8557			7.756	-1.4526	17.23	1.1714			246.14	2.8614			Fenamiphos sulfoxide	5e-06	-5.30103	9.33977	Diphenamid	0.0005	-3.30103	9.33977	Gly-Leu	0.00282174	-2.54948	19.0789
phenylacetylglutamine	3.89131	4.55127	5.9723	level1	2(3H)-Furanone, dihydro-4-hydroxy-	5		7.73258	level1	S-CARBOXYMETHYLCYSTEINE	8.03518		8.97371	level1			Phe-Phe	3.99559	7.29058	5.78833			7.9	-1.4371	12.07	1.1766			598.79	3.0209			Fenbuconazole	5e-06	-5.30103	9.50081	Disulfoton-sulfoxide	0.0005	-3.30103	9.50081	N-Acetyl-L-histidine	0.0029503	-2.53013	19.4079
2-Aminooctanoic acid	4.25044	0.79	6.07196	level1	Car C12:0	16.5618	13.9965		level1	METHYL JASMONATE	14.3626	11.453		level1			DEOXYCARNITINE	4.91413		7.75346			8.885	-1.4195	12.723	1.1784			640.56	3.113			Fenoxycarb	5e-06	-5.30103	9.66184	Diuron	0.0005	-3.30103	9.66184	Ala-Leu	0.00303198	-2.51827	19.7368
Glycocholic acid sodium salt hydrate	3.98213	13.3396	6.16744	level1	1-Methyladenosine	5.91273		7.36217	level1	Adenine	3.77449	4.25	4.59282	level1			cis-Aconitic acid	3.93604					8.38865	-1.3873	5.319	1.1983			128.4	3.1482			Fenpropidin	5e-06	-5.30103	9.82287	Dodine	0.0005	-3.30103	9.82287	3-Hydroxydecanoic acid	0.00311876	-2.50602	20.0658
kynurenic acid	4.41	4.21496	6.22	level1	GCDCA	16.9788	14.2405	4.84616	level1	1-Methyladenosine	5.9544	0.922652	7.38147	level1			Concanavalin A	3.9269	1.76999	4.77891			8.26768	-1.38	15.316	1.2745			56.77	3.2102			Flamprop-isopropyl	5e-06	-5.30103	9.9839	Enestroburin	0.0005	-3.30103	9.9839	1-Methylhistidine	0.00338907	-2.46992	20.3947
Car C3:0	4.35	1.6	6.24494	level1	DEOXYCARNITINE	4.8808	0.79	7.79007	level1	GUDCA	14.7628	12.7176	4.90073	level1			kynurenic acid	4.41	4.21496	6.22			8.881	-1.3676	6.33	1.3495			93.4	3.2211			Flumequine	5e-06	-5.30103	10.1449	Enilconazole	0.0005	-3.30103	10.1449	Hydrocortisone	0.00361985	-2.44131	20.7237
Inosine	4.36199	1.33373	6.33016	level1	Inosinic Acid	8.32038	0.817069	9.18399	level1	2,6-Diaminopimelic acid	8.80147		9.73013	level1			Trehalose	7.96803		8.94399			8.5	-1.3589	12.1533	1.366			88.18	3.4503			Furalaxyl	5e-06	-5.30103	10.306	Epoxiconazole	0.0005	-3.30103	10.306	1,3-Dimethyluric acid	0.00392119	-2.40658	21.0526
2-Methylguanosine	4.20996		6.45202	level1	cis-Aconitic acid	3.94999	0.577598	8.13352	level1	3-Methylxanthine	10.3882	3.22976		level1			Xylitol	5.02271		7.575			3.72	-1.3487	12.658	1.406			85.12	3.6877			Hexazinone	5e-06	-5.30103	10.467	Ethopabate	0.0005	-3.30103	10.467	UDCA	0.00392293	-2.40639	21.3816
N-methyl-D-leucine	4.52185		6.48496	level1	N1-Acetylspermine trihydrochloride	8.94012		9.74411	level1	N-Acetyl-L-proline	3.93285	2.85096	1.14913	level1			Histidine	8.40817		9.33466			8.529	-1.3474	19.5065	1.4093			101.27	3.9076			Hexythiazox	5e-06	-5.30103	10.628	Ethoprophos	0.0005	-3.30103	10.628	delta-Valerolactam	0.00396028	-2.40227	21.7105
P-cresyl glucuronide	4.30922	4.5	6.62586	level1	(2R,3R,4R,5R)-2,3,4,5,6-pentahydroxyhexanal	4.94978	0.801739	7.83	level1	DEOXYCARNITINE	4.69275		7.68494	level1			Dihomo-gamma-linolenic acid	19.4455	17.04				8.68919	-1.3384	12.912	1.4157			109.52	4.0501			Isazofos	5e-06	-5.30103	10.789	Etoxazole	0.0005	-3.30103	10.789	Gly-Val	0.00435251	-2.36126	22.0395
Tryptophan	4.89127	3.60527	6.73913	level1	Stigmasterol	20.6766			level1	cis-Aconitic acid	3.92752	0.70355	7.92	level1			4-Pyridoxic acid			2.73978			7.82276	-1.3309	12.7571	1.4455			129.76	4.3641			Isopyrazam	5e-06	-5.30103	10.9501	Etrimfos	0.0005	-3.30103	10.9501	Asymmetric dimethylarginine	0.00454822	-2.34216	22.3684
5-Hydroxyindole-3-acetic acid	4.71	2.16857	6.8	level1	Trehalose	7.81907		8.92731	level1	lactose	7.8752		8.88532	level1			PIPECOLATE	6.58031		9.43513			7.904	-1.3259	3.816	1.4505			217.02	4.6963			Mandipropamid	5e-06	-5.30103	11.1111	Fenamidone	0.0005	-3.30103	11.1111	Valine	0.00468026	-2.32973	22.6974
SPERMINE			6.80997	level1	Histidine	8.3551	0.726617	9.29838	level1	kynurenic acid	4.27853	4.23551	6.26522	level1			N6-(DELTA2-ISOPENTENYL)-ADENINE	4.47399		7.33761			3.705	-1.2934	14.998	1.4545			458.14	4.8553			Mefenacet	5e-06	-5.30103	11.2721	Fenaminostrobin	0.0005	-3.30103	11.2721	Indoline	0.00475999	-2.32239	23.0263
Phe-Pro	4.67763	5.64618	6.90406	level1	Pyridoxamine	7.00037		7.97255	level1	Xylitol	4.92635	1.04944	7.52748	level1			N-(dodecanoyl)-sphing-4-enine-1-phosphocholine	21.5376	18.6238	5.25662			6.79761	-1.2655	6.36963	1.49			401.47	5.2128			Mesulfenfos	5e-06	-5.30103	11.4332	Fenamiphos sulfone	0.0005	-3.30103	11.4332	LPC 15:0	0.00481317	-2.31757	23.3553
3-Methoxy-1,2-propanediol	4.60643	0.836168	6.97218	level1	4-Pyridoxic acid	3.76			level1	D(+)-Melibiose monohydrate, 99+%	7.93981		8.94635	level1			(2S,3S,4S,5R)-2,3,4,5-tetrahydroxy-6-oxohexanoic acid	8.11371		9.14674			8.88	-1.2644	4.919	1.5966			470.68	5.3			Methabenzthiazuron	5e-06	-5.30103	11.5942	Fenamiphos sulfoxide	0.0005	-3.30103	11.5942	Cytidine	0.00485201	-2.31408	23.6842
cinnamic acid	4.7111	2.41863	6.97432	level1	PIPECOLATE	8.59246		9.5034	level1	Histidine	8.57036	0.676241	9.32652	level1			GLUCURONATE	8.11371		9.14674			3.919	-1.2636	4.954	1.6312			168.14	5.4365			Methfuroxam	5e-06	-5.30103	11.7552	Fenamiphos	0.0005	-3.30103	11.7552	N,N-dimethylglycine	0.00499002	-2.3019	24.0132
Pseudouridine	4.68887		7.00682	level1	URIDINE DIPHOSPHATE-N-ACETYLGLUCOSAMINE	8.93335	0.724248	9.73429	level1	Amlodipine	14.121	11.4383		level1			N-Heptadecanoylsphingosine	23.3241	19.6622				9.502	-1.2485	13.131	1.6332			258.1	5.7139			Methoprotryne	5e-06	-5.30103	11.9163	Fenazaquin	0.0005	-3.30103	11.9163	Glutamylalanine	0.00499002	-2.3019	24.3421
3-hydroxy-3-methylglutarate	3.90497	0.663472	7.01087	level1	N-(dodecanoyl)-sphing-4-enine-1-phosphocholine	21.4032	18.6686	5.35274	level1	ETHYL 3-INDOLEACETATE	13.8	10.4721		level1			1-Octadecanoyl-sn-glycero-3-phosphocholine	20.1264	17.5721	5.41737			4.72996	-1.2357	14.596	1.6435			708.73	5.8016			Metominostrobin	5e-06	-5.30103	12.0773	Fenbendazole	0.0005	-3.30103	12.0773	Homocystine	0.00499002	-2.3019	24.6711
phenyl-glucuronide	4.57231	2.79	7.02663	level1	Cytidine-5'-monophosphate	8.58641	0.809363	9.45048	level1	4-PYRIDOXATE	3.70851	1.51206		level1			Cystathionine	8.81		9.70247			8.19838	-1.2322	4.59624	1.6546			119.54	5.9002			Michler's ketone	5e-06	-5.30103	12.2383	Fenbuconazole	0.0005	-3.30103	12.2383	p-aminobenzoic acid	0.005	-2.30103	25
indoxyl glucuronide	4.7212		7.04297	level1	3-Furoic acid	4.195	0.723671		level1	PIPECOLATE	6.59778		9.48078	level1			Car C18:1	19.2215	16.5676	3.30153			7.3022	-1.2209	13.642	1.673			100.76	6.6			Naftifine hydrochloride	5e-06	-5.30103	12.3994	Fenoxanil	0.0005	-3.30103	12.3994	cholic acid	0.005	-2.30103	25.3289
Car C2:0	4.72996	0.942637	7.09038	level1	1-Octadecanoyl-sn-glycero-3-phosphocholine	20.2631	17.4174	5.53516	level1	N-ACETYLASPARAGINE	4.88113	1.08106		level1			gamma-Caprolactone	4.69086	1.5103	7.13323			7.652	-1.2152	12.78	1.7038			569.87	6.9969			Napropamide	5e-06	-5.30103	12.5604	Fenoxycarb	0.0005	-3.30103	12.5604	4-aminobutyric acid	0.005	-2.30103	25.6579
Phenylalanine	4.70563	2.50259	7.10485	level1	Ethylene glycol dipalmitate	19.74	17.0678		level1	(2S,3S,4S,5R)-2,3,4,5-tetrahydroxy-6-oxohexanoic acid	8.01952		9.13885	level1			Lactulose	7.80678		8.85505			3.9	-1.2062	12.5046	1.721			108.72	7.2			Oxadixyl	5e-06	-5.30103	12.7214	Fenpropidin	0.0005	-3.30103	12.7214	N-acetyl-L-phenylalaine	0.005	-2.30103	25.9868
Isoleucine	4.69086	1.40067	7.13323	level1	Cystathionine	8.84754	0.701152	9.71275	level1	N-Heptadecanoylsphingosine		19.6176		level1			3-Methyl-L-histidine	8.39675		9.30684			8.543	-1.1705	5.459	1.7526			13797.1	7.2877			Penconazole	5e-06	-5.30103	12.8824	Fenpyroximate	0.0005	-3.30103	12.8824	phenylacetaldehyde	0.005	-2.30103	26.3158
delta-Hexalactone	4.69086	1.40067	7.13323	level1	PALMITATE	16.1052	13.4633		level1	1-Octadecanoyl-sn-glycero-3-phosphocholine		17.4541		level1			phenylacetylglutamine	3.89131	4.55127	5.9723			6.10031	-1.1671	13.4478	1.7816			150.64	7.3291			Pencycuron	5e-06	-5.30103	13.0435	Finasteride	0.0005	-3.30103	13.0435	tyramine	0.005	-2.30103	26.6447
gamma-Caprolactone	4.69086	1.5103	7.13323	level1	Car C18:1	19.3315	16.6015		level1	N-Acetyl-L-valine		4.01384		level1			PHOSPHORYLCHOLINE	8.66438		9.56053			8.26404	-1.127	12.547	1.7921			4982	8.0565			Penflufen	5e-06	-5.30103	13.2045	Flamprop-isopropyl	0.0005	-3.30103	13.2045	3-nitrotyrosine	0.005	-2.30103	26.9737
Leucine	4.69086	1.51985	7.13323	level1	Cyclic AMP	6.668		8.44	level1	Cystathionine	8.82922		9.7518	level1			2-Acetamido-3-hydroxypropanoic acid	4.70038		8.76			7.04439	-1.1037	12.369	1.7924			5845.31	8.3887			Phenamacril	5e-06	-5.30103	13.3655	Flumequine	0.0005	-3.30103	13.3655	indole-3-propionic acid	0.005	-2.30103	27.3026
Norleucine	4.69086	1.51985	7.13323	level1	Gly-Phe	4.98612	3.65329	7.63428	level1	Octopine	8.67427	1.05191	9.5281	level1			DIPALMITOYL-PHOSPHATIDYLCHOLINE	23.4864	19.6309	4.72835			4.753	-1.0934	12.64	1.795			1472.04	8.4491			Picolinafen	5e-06	-5.30103	13.5266	Flumorph	0.0005	-3.30103	13.5266	kynurenic acid	0.005	-2.30103	27.6316
Guanosine	4.84		7.1449	level1	Ophthalmic acid	8.01603	0.89088	8.98401	level1	PALMITATE	15.9822	13.5149		level1			Phe-Trp	3.99159	7.1848	5.67431			8.69582	-1.0801	4.525	1.8287			1100.93	8.9449			Pioglitazone hydrochloride	5e-06	-5.30103	13.6876	Fluometuron	0.0005	-3.30103	13.6876	phenylacetylglutamine	0.005	-2.30103	27.9605
NORVALINE	4.94135		7.20402	level1	Lactulose	7.77482	0.77	8.88579	level1	Cyclic AMP	6.59507	1.63745	7.79979	level1			P-cresyl glucuronide	4.30922	4.5	6.62586			8.81	-1.0665	14.236	1.8342			232.13	9.1689			Pirimiphos-ethyl	5e-06	-5.30103	13.8486	Fluopyram	0.0005	-3.30103	13.8486	shikimic acid	0.005	-2.30103	28.2895
Aminocaproic acid	4.43246	1.38602	7.25425	level1	3-Methyl-L-histidine	8.41057		9.31286	level1	5-Methoxysalicylic acid			1.45654	level1			Calcium L-Threonate	6.56316		8.48906			6.968	-1.0657	3.762	1.856			519.52	9.3305			Pirimiphos-methyl	5e-06	-5.30103	14.0097	Fluphenazine	0.0005	-3.30103	14.0097	indoxyl glucuronide	0.005	-2.30103	28.6184
Pro-leu	4.81242	0.88	7.26415	level1	phenylacetylglutamine	3.84204	4.54231	5.96527	level1	3-Methyl-L-histidine	8.4191		9.36947	level1			N-Acetyl-L-ornithine	7.36396		8.1867			8.319	-1.0599	13.0873	1.8834			435.36	10.2768			Prometon	5e-06	-5.30103	14.1707	Fluridone	0.0005	-3.30103	14.1707	deoxycholic acid	0.005	-2.30103	28.9474
Xanthosine dihydrate	4.72288		7.2653	level1	PHOSPHORYLCHOLINE	8.74163	0.828968	9.38568	level1	N-Acetyl-L-isoleucine	12.3849	6.08796	2.19045	level1			l-glutamyl-l-threonine	8.35938		9.31013			4.60643	-1.014	13.962	1.959			785	10.6118			Propaphos	5e-06	-5.30103	14.3317	Flurtamone	0.0005	-3.30103	14.3317	xanthine	0.005	-2.30103	29.2763
1-Methyladenosine	5.73334	0.943576	7.31087	level1	DIPALMITOYL-PHOSPHATIDYLCHOLINE	23.5515	19.6165	4.86123	level1	phenylacetylglutamine	4.11754	4.51358	6.02609	level1			Calcifediol monohydrate	19.4556	16.7178				7.96487	-1.0013	12.912	1.9747			213.86	10.6669			Propranolol hydrochloride	5e-06	-5.30103	14.4928	Flusilazole	0.0005	-3.30103	14.4928	5-methylcytosine	0.005	-2.30103	29.6053
N6-(DELTA2-ISOPENTENYL)-ADENINE	4.47399	0.8028	7.33761	level1	Calcium L-Threonate			8.33531	level1	PHOSPHORYLCHOLINE	8.79483		9.53766	level1			CORTISOL	13.4478	10.0935				7.409	-0.9602	13.2399	1.9898			2451.5	10.8455			Pyrazophos	5e-06	-5.30103	14.6538	Flutolanil	0.0005	-3.30103	14.6538	pyridoxine	0.005	-2.30103	29.9342
Trigonelline			7.34793	level1	N-Acetyl-L-ornithine	7.33921		8.3352	level1	Dormin	12.8709	9.02223		level1			3-Amino-3-(4-hydroxyphenyl)propanoic acid	6.36963	1.24857	7.71634			4.65517	-0.9496	18.924	2			226.38	11.6495			Pyridaben	5e-06	-5.30103	14.8148	Flutriafol	0.0005	-3.30103	14.8148	cortisone	0.005	-2.30103	30.2632
Methionine	5.00209	0.978687	7.41201	level1	l-glutamyl-l-threonine	8.46869		9.29707	level1	P-cresyl glucuronide	4.36513	4.58228	6.67895	level1			Glutamylalanine	8.19838		8.98719			8.46274	-0.9483	13.3566	2.0006			3576.51	11.9409			Pyridaphenthion	5e-06	-5.30103	14.9758	Fluxapyroxad	0.0005	-3.30103	14.9758	N-methyltryptamine	0.005	-2.30103	30.5921
N-Acetyl-L-glutamic acid	4.77781	0.7	7.43	level1	CORTISOL	13.504	10.0899		level1	Calcium L-Threonate	6.91975	0.967877	8.28829	level1			2-azaniumylethyl [(2R)-2-hydroxy-3-[(Z)-octadec-1-enoxy]propyl] phosphate	21.5934	18.64				8.601	-0.8628	19.09	2.0243			762.16	12.3561			Pyriftalid	5e-06	-5.30103	15.1369	Furalaxyl	0.0005	-3.30103	15.1369	3-hydroxy-3-methylglutarate	0.005	-2.30103	30.9211
4-GUANIDINOBUTANOATE	4.75817		7.50274	level1	Lactobionic acid	8.54753		9.52	level1	N-Acetyl-L-ornithine	7.33667		8.4106	level1			N-Acetyl-L-histidine	7.22237		8.06995			6.97398	-0.8332	12.912	2.0631			2496.97	12.3934			Pyrimidifen	5e-06	-5.30103	15.2979	Furmecyclox	0.0005	-3.30103	15.2979	Adenosine	0.005	-2.30103	31.25
Xylitol	5.02271	0.955901	7.575	level1	Glutamylalanine	8.16928		9.04193	level1	l-glutamyl-l-threonine	8.35929	0.800701	9.29677	level1			Ethyl 3,4-dihydroxybenzoate	15.316	12.6275				7.62163	-0.8331	14.0707	2.094			373.49	13.2315			Pyriminobac-methyl	5e-06	-5.30103	15.4589	Gabapentin	0.0005	-3.30103	15.4589	corticosterone	0.005	-2.30103	31.5789
Ala-Leu	4.76328	0.8	7.59321	level1	2-azaniumylethyl [(2R)-2-hydroxy-3-[(Z)-octadec-1-enoxy]propyl] phosphate	21.5106	18.65		level1	UREIDOPROPIONATE	3.83434			level1			Lysine	8.75516		9.44369			8.86455	-0.8084	13.2223	2.1034			221.57	13.2894			Quinoxyfen	5e-06	-5.30103	15.62	Gestrinone	0.0005	-3.30103	15.62	nicotinic acid	0.005	-2.30103	31.9079
3-(1-Pyrazolyl)-L-alanine	5.73813	0.95636	7.62236	level1	N-Acetyl-L-histidine	6.97522		8.12845	level1	CORTISOL	13.4337	10.0782	1.41422	level1			3-Guanidinopropionic acid	6.79761		7.98302			8.443	-0.7804	6.33813	2.1362			205.79	17.2			Rabenzazole	5e-06	-5.30103	15.781	Haloxyfop-P-methyl	0.0005	-3.30103	15.781	3,4-dihydroxymandelic acid	0.005	-2.30103	32.2368
L-tyrosine	6.24612	1.12771	7.71634	level1	Lysine	8.51869	0.665318	9.40355	level1	Lactobionic acid	8.52738		9.49	level1			Glu-glu	8.38865		9.29056			4.681	-0.7773	11.938	2.1851			353.94	3.6927			Repaglinide	5e-06	-5.30103	15.942	Hexazinone	0.0005	-3.30103	15.942	gluconic acid	0.005	-2.30103	32.5658
3-Amino-3-(4-hydroxyphenyl)propanoic acid	6.36963	1.24857	7.71634	level1	Glu-glu	8.47283	0.925567	9.30856	level1	Glutamylalanine	8.22371		9.28137	level1			Linoleoyl ethanolamide	20.3515	17.6052				5.59238	-0.7763	13.304	2.2305			333.14	3.0429			Rosiglitazone maleate	5e-06	-5.30103	16.1031	Hexythiazox	0.0005	-3.30103	16.1031	N-acetylcadaverine	0.005	-2.30103	32.8947
DEOXYCARNITINE	4.91413		7.75346	level1	tricarballylic acid (1,2,3-Propanetricarboxylic acid)	4.39546	0.72	8.64646	level1	N-Acetyl-L-histidine	7.1333	0.816707	8.07464	level1			3-Indolepropionic acid	13.0873	9.1217				8.06824	-0.7391	15.459	2.239			109.1	13.6			Sedaxane	5e-06	-5.30103	16.2641	Imipramine hydrochloride	0.0005	-3.30103	16.2641	Xanthosine	0.005	-2.30103	33.2237
Carnitine	4.99567	0.742358	7.77102	level1	Linoleoyl ethanolamide	20.7464	16.1559		level1	Lysine	8.54589	0.677891	9.41524	level1			indoxyl glucuronide	4.7212		7.04297			7.90114	-0.7369	19.705	2.2483							Sethoxydim	5e-06	-5.30103	16.4251	Isazofos	0.0005	-3.30103	16.4251	4-O-methylgallic acid	0.005	-2.30103	33.5526
Proline	5.95012	0.818917	7.7716	level1	Glycyl-L-proline	7.68206	0.8	8.50146	level1	Putrescine	8.43426		9.01325	level1			Gluceptate sodium dihydrate	8.00446					8.038	-0.7355	12.554	2.2524							S-Metolachlor	5e-06	-5.30103	16.5862	Isonoruron	0.0005	-3.30103	16.5862	3-indolelactic acid	0.005	-2.30103	33.8816
Uric Acid	5.54215	0.84	7.82947	level1	Uric Acid	5.44992	0.847153	7.6535	level1	CYCLIC GMP	7.54482	2.87276	8.33738	level1			Sodium deoxycholate	16.7707	14.9				5.73813	-0.705	12.977	2.2626							Spirotetramat-enol	5e-06	-5.30103	16.7472	Isoproturon	0.0005	-3.30103	16.7472	3-methoxybenzoic acid	0.005	-2.30103	34.2105
Glycyl-L-valine	6.8591	1.55894	7.84759	level1	Cystine	8.85738	0.71	9.76001	level1	3-Guanidinopropionic acid	6.93132		8.04543	level1			Uric Acid	5.54215		7.82947			8.564	-0.7033	11.7358	2.2657							Sulfadimethoxine	5e-06	-5.30103	16.9082	Isopyrazam	0.0005	-3.30103	16.9082	N-acetylhistamine	0.005	-2.30103	34.5395
L-Theanine	6.44745	0.88	7.84759	level1	3-Hydroxynorvaline	6.6858	0.77	8.12656	level1	3-hydroxy-3-methylglutarate	3.7827	0.684984	7.10049	level1			Cystine	8.86455		9.74568			4.685	-0.7033	14.0567	2.2723							Terbuthylazine	5e-06	-5.30103	17.0692	Isouron	0.0005	-3.30103	17.0692	cinnamoylglycine	0.005	-2.30103	34.8684
D-sorbose	4.7473	1.0158	7.85155	level1	3'-Adenylic acid	7.85719	1.36446	8.68591	level1	tricarballylic acid (1,2,3-Propanetricarboxylic acid)	4.45217		8.74	level1			3-(3,4-dimethoxyphenyl) propionic acid	12.5046	8.31748				4.34136	-0.7033	8.852	2.291							Terbutryn	5e-06	-5.30103	17.2303	Isoxaben	0.0005	-3.30103	17.2303	phenylpropionylglycine	0.005	-2.30103	35.1974
Taurine	6.10031		7.85318	level1	Indoline	4.71058	2.36263	6.83	level1	N-Acetyl-L-glutamine	4.87004	0.920361	7.85114	level1			2-Hydroxyquinoline		6.553				9.133	-0.7007	14.913	2.3006							Timolol	5e-06	-5.30103	17.3913	Isoxathion	0.0005	-3.30103	17.3913	2-phenylpropionic acid	0.005	-2.30103	35.5263
Mannitol	5.25876	0.791876	7.85438	level1	xanthine	4.01548	1.13502	5.65258	level1	3-Indolepropionic acid	12.97	9.09447		level1			Urocanic acid			3.63561			6.44745	-0.6854	13.348	2.3218							Triamiphos	5e-06	-5.30103	17.5523	Isoxsuprine	0.0005	-3.30103	17.5523	imidazole propionate	0.005	-2.30103	35.8553
3-Hydroxybutyric acid	6.86		7.89499	level1	ADENOSINE DIPHOSPHATE RIBOSE	8.79227		9.69343	level1	indoxyl glucuronide	4.65241	3.32547	7.01611	level1			Indoline	4.59624	2.39206				8.521	-0.6794	19.065	2.3565							Trifloxystrobin	5e-06	-5.30103	17.7134	Linuron	0.0005	-3.30103	17.7134	4-hydroxyhippuric acid	0.005	-2.30103	36.1842
CREATINE	7.04439	0.762834	7.98302	level1	Car C10:0	14.9	12.27		level1	Glycyl-L-proline	7.58094	0.797862	8.57347	level1			xanthine	4.01283		5.68591			7.771	-0.6763	13.374	2.3648							4-Chloro-5-(p-tolyl)-1H-imidazole-2-carbonitrile	5e-06	-5.30103	17.8744	Mandipropamid	0.0005	-3.30103	17.8744	Pyroglutamic acid	0.00515851	-2.28748	36.5132
3-Guanidinopropionic acid	6.79761	0.762834	7.98302	level1	N-Acetyl-D-glucosamine	4.66587	0.8	7.36042	level1	Uric Acid	5.55176	0.893378	7.85965	level1			Norleucine	4.69086	1.51985	7.13323			4.75817	-0.6657	13.082	2.3736							Acebutolol	5e-06	-5.30103	18.0354	Matrine	0.0005	-3.30103	18.0354	LPC 18:0	0.00523364	-2.2812	36.8421
Glu-Leu	7.18209	4.40225	7.98569	level1	Docosahexaenoic acid	19.0259	16.6109		level1	Cystine	8.92643	0.741933	9.81483	level1			5-methylcytosine	4.24505		5.93			8.40817	-0.6359	11.686	2.3917							Benodanil	5e-06	-5.30103	18.1965	Mefenacet	0.0005	-3.30103	18.1965	trans-4-Hydroxy-L-proline	0.00523908	-2.28074	37.1711
Sarcosine	6.87849	1.43512	7.998	level1	S-ADENOSYLMETHIONINE	8.78468	0.756848	9.70329	level1	3-Hydroxynorvaline	6.65639		7.75404	level1			2-phenylacetamide	11.43	3.75711				8.00995	-0.6255	13.732	2.3979							Bensulfuron methyl	5e-06	-5.30103	18.3575	Mepanipyrim	0.0005	-3.30103	18.3575	N-methyl-D-leucine	0.00544164	-2.26427	37.5
Hypotaurine	6.97398		8.02228	level1	5-Hydroxy-DL-lysine	8.83936		9.75135	level1	3-(3,4-dimethoxyphenyl) propionic acid	12.5988	8.59038		level1			3-Chlorobenzoic acid	12.07	5.39	1.30015			8.39675	-0.6255	3.826	2.4283							Benzoylprop-ethyl	5e-06	-5.30103	18.5185	Mephosfolan	0.0005	-3.30103	18.5185	FANH2 18:1	0.00562195	-2.25011	37.8289
N6-Acetyl-L-lysine	7.07668	0.863804	8.02635	level1	Phenylpyruvic acid	6.21667	1.15	7.64552	level1	Biopterin	4.60952	1.22341	6.70899	level1			Car C10:0	14.9164	12.3899	4.1348			3.88	-0.621	20.41	2.4723							Bromfenvinphos	5e-06	-5.30103	18.6795	Mepronil	0.0005	-3.30103	18.6795	3-Hydroxyglutaric Acid	0.00591782	-2.22784	38.1579
N-Acetyl-L-arginine	7.23393	0.946814	8.0533	level1	Glucosamine	8.00264		8.88934	level1	N-Phenylacetylphenylalanine	12.9397	9.88642		level1			Docosahexaenoic acid	19.1993	16.69				8.508	-0.6132	12.418	2.4914							Carazolol	5e-06	-5.30103	18.8406	Mesulfenfos	0.0005	-3.30103	18.8406	Phenylglycine	0.00603879	-2.21905	38.4868
N-Acetyl-L-histidine	7.22237	0.77	8.06995	level1	Serine	7.6988	0.772837	8.73535	level1	2-Hydroxyquinoline	12.68	6.50827		level1			20-Hydroxycholesterol	19.1095	16.4046	3.35844			8.01184	-0.6023	14.8671	2.5011							Cinosulfuron	5e-06	-5.30103	19.0016	Methabenzthiazuron	0.0005	-3.30103	19.0016	Methyl oleate	0.00623752	-2.20499	38.8158
AMINOADIPATE	7.73103	0.85346	8.0799	level1	Methyl L-tyrosinate		3.18157		level1	Urocanic acid	3.86645	1.1251	3.69524	level1			Cortisone	13.2399	9.75465				4.70038	-0.5917	8.745	2.5349							Clethodim Sulfoxide	5e-06	-5.30103	19.1626	Methfuroxam	0.0005	-3.30103	19.1626	N-Acetyl-DL-aspartic acid	0.00699758	-2.15505	39.1447
Orotidine	7.04697		8.12916	level1	Glu-Leu	6.74765	4.35272	8.04171	level1	Indoline	4.67925	2.39754	6.80847	level1			5-Hydroxy-DL-lysine	8.69582		9.62311			7.26009	-0.5818	20.071	2.5587							Cloquintocet - mexyl	5e-06	-5.30103	19.3237	Methoprotryne	0.0005	-3.30103	19.3237	Proline betaine	0.00715473	-2.14541	39.4737
L-Aspartyl-L-phenylalanine	7.34222	3.90835	8.13268	level1	4-COUMARATE	6.38555	1.23938		level1	xanthine	4.04755	1.31379	5.69159	level1			Serine	7.69831		8.61454			4.7212	-0.5611	8.583	2.5599							Cyanazine	5e-06	-5.30103	19.4847	Metominostrobin	0.0005	-3.30103	19.4847	N-Acetyl-L-glutamine	0.00751853	-2.12387	39.8026
Asp-Leu	7.46142	3.55776	8.14846	level1	AICA ribonucleotide	8.27772			level1	5-methylcytosine	4.29723		5.57708	level1			Testosterone	14.927	12.2224				3.79	-0.5482	5.005	2.568							Desmethyl Norflurazon	5e-06	-5.30103	19.6457	Metoprolol	0.0005	-3.30103	19.6457	N-Acetyl-L-glutamic acid	0.00755786	-2.1216	40.1316
guanidineacetic acid（晓琳姐母液）	7.3234		8.15128	level1	3-hydroxy-3-methylglutarate	3.87258	0.79	7.07037	level1	2-phenylacetamide	11.5823	3.88106	3.36098	level1			Glu-Leu	7.18209	4.40225	7.98569			5.54215	-0.5303	16.233	2.5778							Difenoconazole	5e-06	-5.30103	19.8068	Metoxuron	0.0005	-3.30103	19.8068	6β-Hydroxytestosterone	0.0076051	-2.1189	40.4605
N-ALPHA-ACETYLLYSINE	7.37467	0.863804	8.17344	level1	PENTANOATE	4.51754		5.61818	level1	Car C10:0	14.8785	12.2761	4.15787	level1			4-COUMARATE	6.36963	1.24857				7.54392	-0.4762	14.913	2.5943							Diflufenican	5e-06	-5.30103	19.9678	Metribuzin	0.0005	-3.30103	19.9678	Norepinephrine	0.00844846	-2.07322	40.7895
N-Acetyl-L-ornithine	7.36396	0.8	8.1867	level1	Histamine	7.23164		8.31672	level1	N-Acetyl-D-glucosamine	4.82382		7.3018	level1			3-hydroxy-3-methylglutarate	3.90497		7.01087			8.75516	-0.4727	14.77	2.6							Fenhexamid	5e-06	-5.30103	20.1288	Michler's ketone	0.0005	-3.30103	20.1288	N-Acetyl-L-arginine	0.00863953	-2.06351	41.1184
ALLOTHREONINE	7.3022	0.792187	8.19745	level1	Guanosine	4.82473	1.34551	7.15917	level1	S-ADENOSYLMETHIONINE	8.67628		9.63404	level1			Histamine	7.1499		8.31797			7.22237	-0.4585	9.124	2.6084							Fensulfothion-oxon	5e-06	-5.30103	20.2899	Monalide	0.0005	-3.30103	20.2899	Homoarginine	0.00940637	-2.02658	41.4474
L-homoserine	7.69228	1.04091	8.21419	level1	L-pyroglutamic acid	4.8521	1.03746	7.84	level1	Cortisone	13.42	11.4063		level1			GLUTARYLCARNITINE	4.91579	1.22879				8.614	-0.446	14.312	2.645							Hydroxyzine dihydrochloride	5e-06	-5.30103	20.4509	Monolinuron	0.0005	-3.30103	20.4509	Uridine	0.00975673	-2.0107	41.7763
Valylserine	7.63982	0.941834	8.22009	level1	Arginine	8.69612	0.692917	9.50328	level1	5-Hydroxy-DL-lysine	8.83006		9.66334	level1			Guanosine	4.84		7.1449			8.614	-0.446	16.6019	2.6653							Indoxacarb	5e-06	-5.30103	20.6119	morpholinopropiophenone	0.0005	-3.30103	20.6119	Phe-Pro	0.00982994	-2.00745	42.1053
PYRUVIC ALDEHYDE	6.87849	0.935199	8.24283	level1	Methyl arachidonate	20.385	17.8274		level1	Glucosamine	7.89645	3.12961	8.91796	level1			Gamma-nonalactone	14.0567	10.5674				4.89	-0.4446	14.1013	2.6667							Minoxidil	5e-06	-5.30103	20.7729	N,N-Dimethyl-N'-p-tolylsulphamide	0.0005	-3.30103	20.7729	N-Acetyl-D-tryptophan	0.00983792	-2.0071	42.4342
Alanine	7.26009		8.24283	level1	Adenosine	3.91679	1.78332	4.90866	level1	Serine	7.72785	0.808205	8.64364	level1			Arginine	8.68919		9.31309			3.93604	-0.4433	18.539	2.7808							Norflurazon	5e-06	-5.30103	20.934	Naftifine hydrochloride	0.0005	-3.30103	20.934	l-glutamyl-l-threonine	0.00998004	-2.00087	42.7632
Histamine	7.1499	0.682066	8.31797	level1	ANSERINE	8.51787		9.29983	level1	4-IMIDAZOLEACETATE	6.71948		7.90814	level1			Methyl arachidonate	20.8403	17.9257				8.70363	-0.441	12.31	2.8787							Paraoxon	5e-06	-5.30103	21.095	Nalidixic acid	0.0005	-3.30103	21.095	equol	0.01	-2	43.0921
Sucrose	7.38456		8.43996	level1	Proline	5.82032	0.822008	7.79095	level1	N,N,N-TRIMETHYLLYSINE	8.38318	0.673575	9.2306	level1			Adenosine	3.9269	1.76999	4.90519			7.87	-0.4377	14.914	2.8988							Proquinazid	5e-06	-5.30103	21.256	Napropamide	0.0005	-3.30103	21.256	ornithine	0.01	-2	43.4211
L-methionine sulfoxide	7.62163		8.45316	level1	N-ACETYLASPARTATE	4.78824	0.653698	7.78375	level1	Glu-Leu	6.81133	4.12041	8.06283	level1			corticosterone（肾上腺）皮质脂酮	14.1013	11.0636				8.379	-0.4094	17.936	2.9207							Ractopamine	5e-06	-5.30103	21.4171	o-Aminoazotoluene	0.0005	-3.30103	21.4171	glycochenodeoxycholic acid	0.01	-2	43.75
OXALOMALATE	7.73837		8.47	level1	Sphinganine	18.8131	16.1655		level1	Dihydrothymine	3.52773	2.69932	4.79706	level1			Proline	5.95012		7.7716			4.64	-0.4035	4.726	2.9217							Triasulfuron	5e-06	-5.30103	21.5781	Oxadixyl	0.0005	-3.30103	21.5781	histidine	0.01	-2	44.0789
Calcium L-Threonate	6.56316	0.714404	8.48906	level1	L-tyrosine	6.3		7.76057	level1	N4-Acetylcytidine	3.83466	2.68555	5.13207	level1			N-ACETYLASPARTATE	4.65517					8.143	-0.3919	4.896	2.9228							Bromperidol	5e-06	-5.30103	21.7391	Paclobutrazol	0.0005	-3.30103	21.7391	4-pyridoxic acid	0.01	-2	44.4079
N-METHYLGLUTAMATE	7.54392	0.85346	8.60688	level1	2-Aminoadipic acid	7.60967		8.4902	level1	Cycloleucine	5.94196		8.01414	level1			1,3-Dimethyluric acid		4.19	4.26831			8.259	-0.3573	14.016	2.9303							Chlorsulfuron	5e-06	-5.30103	21.9002	Penbutolol	0.0005	-3.30103	21.9002	p-cresol	0.01	-2	44.7368
Serine	7.69831		8.61454	level1	1-AMINOCYCLOPROPANECARBOXYLATE	7.82989		8.7705	level1	Phenylglycine			7.97867	level1			L-tyrosine	6.24612	1.12771	7.71634			4.891	-0.357	17.174	2.9377							Clindamycin	5e-06	-5.30103	22.0612	Penconazole	0.0005	-3.30103	22.0612	glutaric acid	0.01	-2	45.0658
Asparagine	7.75587		8.67542	level1	23537-25-9	8.06		9.0363	level1	PENTANOATE	4.51999		5.84901	level1			2'-O-Methylguanosine	4.22		5.821			7.73103	-0.3468	12.543	2.9575							Diaveridine	5e-06	-5.30103	22.2222	Pencycuron	0.0005	-3.30103	22.2222	docosahexaenoic acid	0.01	-2	45.3947
1-AMINOCYCLOPROPANECARBOXYLATE	7.87		8.69517	level1	Carnitine	5.05183	0.730217	7.91564	level1	Histamine	7.25054	0.665185	8.30858	level1			AMINOADIPATE	7.73103		8.0799			4	-0.34	15.757	2.9811							Emamectin benzoate	5e-06	-5.30103	22.3833	Penflufen	0.0005	-3.30103	22.3833	1-Boc-D-prolyl-glycine	0.01	-2	45.7237
Glutamic acid	7.90114	0.79	8.7104	level1	Gluconolactone	3.96472	1.14217		level1	Allantoic acid	7.64788		8.66787	level1			1-AMINOCYCLOPROPANECARBOXYLATE	7.87		8.69517			4.24505	-0.3395	20.487	2.9851							Ethiprole	5e-06	-5.30103	22.5443	Penthiopyrad	0.0005	-3.30103	22.5443	3-indoleacrylic acid	0.01	-2	46.0526
S-adenosyl-L-homocysteine	7.9		8.71526	level1	URIDINE DIPHOSPHATE GLUCOSE	9.03803	0.708862	9.91626	level1	GLUTARYLCARNITINE	5.3804	1.46105	7.80871	level1			Carnitine	4.99567		7.77102			9.07424	-0.3363	15.426	2.9874							Fensulfothion-oxon-sulfone	5e-06	-5.30103	22.7053	Phenamacril	0.0005	-3.30103	22.7053	TLCA	0.01	-2	46.3816
Glutamine	7.79454	0.850598	8.72708	level1	3-Indoleacrylic acid		5.10114		level1	Guanosine	4.99615	2.82268	7.3327	level1			3-(1-Pyrazolyl)-L-alanine	5.73813		7.62236			7.9	-0.3342	14.28	2.9877							Fensulfothion-Sulfone	5e-06	-5.30103	22.8663	Phorate sulfoxide	0.0005	-3.30103	22.8663	indole	0.01	-2	46.7105
Alanylglycine	7.55372	0.850598	8.72708	level1	Epoxycholesterol	18.9843	16.3396		level1	L-pyroglutamic acid	4.80314	0.92369	7.7701	level1			3-Indoleacrylic acid	11.7358	5.1026				7.23393	-0.3207	15.217	2.9972							Florasulam	5e-06	-5.30103	23.0274	Phosphamidon	0.0005	-3.30103	23.0274	lithocholic acid	0.01	-2	47.0395
AMINOISOBUTANOATE	7.9	0.707889	8.74504	level1	Car C14:0	18.0027	15.3457		level1	Arginine	8.51765	0.722664	9.34601	level1			Hydroxyproline	3.9		5.10909			3.90497	-0.3132	14.379	3.0209							Fluthiacet-methyl	5e-06	-5.30103	23.1884	Picolinafen	0.0005	-3.30103	23.1884	Glycodeoxycholic acid	0.01	-2	47.3684
DIHYDROOROTATE	7.82276	0.86	8.74549	level1	3-Methoxy-1,2-propanediol	4.74278	0.8	7.06507	level1	malonic acid	3.73789	0.69		level1			ALLANTOIN	4.08288		5.72734			4.821	-0.3114	13.474	3.0209							Haloperidol	5e-06	-5.30103	23.3494	Pioglitazone hydrochloride	0.0005	-3.30103	23.3494	2-Methylsuccinic acid	0.01	-2	47.6974
2-Acetamido-3-hydroxypropanoic acid	4.70038		8.76	level1	N-acetyl cysteine	3.89648	1.18276	5.33655	level1	Adenosine	3.96922	1.74164	4.96342	level1			4-Oxononanoic acid	13.3566	9.23434				7.37467	-0.2953	14.022	3.0209							Halosulfuron-methyl	5e-06	-5.30103	23.5105	Piperophos	0.0005	-3.30103	23.5105	Pipecolinic acid	0.0103199	-1.98632	48.0263
Citrulline	8.06824	0.907787	8.76954	level1	LPE 18:1	20.318	17.8779	5.74066	level1	N-Acetylglycine	4.5081	0.87	7.48	level1			Epoxycholesterol	19.1095	16.4046	3.35844			8.336	-0.2909	14.042	3.0276							Lincomycin	5e-06	-5.30103	23.6715	Pirimiphos-ethyl	0.0005	-3.30103	23.6715	N-propionylglycine	0.0104782	-1.97971	48.3553
Guanidinosuccinic acid	7.90788	0.7	8.77	level1	AMINOISOBUTANOATE	8.01003		8.72715	level1	3-Hydroxymandelic acid	3.73	0.83	5.29952	level1			Car C14:0	17.913	15.367				8.37721	-0.2893	13.771	3.0477							Mesosulfuron-methyl	5e-06	-5.30103	23.8325	Pirimiphos-methyl	0.0005	-3.30103	23.8325	N-phenylacetylglycine	0.0108604	-1.96415	48.6842
GLUCONATE	7.66273	0.728673	8.78247	level1	L-methionine sulfoxide	7.54664	1.02062	8.47335	level1	ANSERINE	8.5558	1.19325	9.2863	level1			3-Methoxy-1,2-propanediol	4.60643		6.97218			8.68688	-0.2885	13.388	3.0536							Oxadiazon	5e-06	-5.30103	23.9936	Pretilachlor	0.0005	-3.30103	23.9936	Monoethylhexyl phthalate	0.0111192	-1.95393	49.0132
Agmatine sulfate	7.96487		8.79	level1	Glyceryl palmitate	20.39	17.7089		level1	Proline	6.11		7.79107	level1			Pseudouridine	4.68887		7.00682			7.79454	-0.2862	14.7139	3.0566							Pseudovardenafil	5e-06	-5.30103	24.1546	Prometon	0.0005	-3.30103	24.1546	α-Ketoglutaric acid	0.0116817	-1.93249	49.3421
N-acetylneuramic acid	7.914		8.79719	level1	Tryptophan	4.76559	3.42949	6.75721	level1	Cytosine	4.44469		5.84722	level1			N-Formylmethionine	3.73821	2	4.01791			8.762	-0.2828	20.6866	3.0602							Thifensulfuron-methyl	5e-06	-5.30103	24.3156	Prometryn	0.0005	-3.30103	24.3156	5-Aminovaleric acid	0.0117334	-1.93058	49.6711
1-Methyl-L-histidine	8.00995	0.699908	8.80706	level1	Alanine	7.3225	0.672577	8.26551	level1	N-ACETYLASPARTATE	4.6457	0.65378	7.82613	level1			LPE 18:1	19.6087	16.9394	5.74862			8.762	-0.2828	15.633	3.0841							Tris(2-isopropylphenyl) phosphate	5e-06	-5.30103	24.4767	Propaphos	0.0005	-3.30103	24.4767	1-Phenethylamine	0.0120847	-1.91776	50
Lactulose	7.80678		8.85505	level1	HOMOVANILLATE	10.3938	1.61	3.86881	level1	1,3-Dimethyluric acid	3.57359	2.86059	4.15005	level1			AMINOISOBUTANOATE	7.9		8.74504			4.01283	-0.2359	4.984	3.0943							Fenobucarb	5e-06	-5.30103	24.6377	Propazine	0.0005	-3.30103	24.6377	3-(1-Pyrazolyl)-L-alanine	0.0123979	-1.90665	50.3289
3-Hexenedioic acid	8.02717	2.84205	8.85863	level1	Homoarginine	8.428		9.30304	level1	L-tyrosine	6.23936	1.13908	7.60519	level1			L-methionine sulfoxide	7.62163		8.45316			4.25	-0.2347	18.079	3.0984							Crufomate	5e-06	-5.30103	24.7987	Propisochlor	0.0005	-3.30103	24.7987	Uric Acid	0.012475	-1.90396	50.6579
(S)-2-hydroxy-3-(1H-imidazol-4-yl)propanoic acid	8.01184	0.848202	8.89662	level1	Dihydroxyacetone phosphate	7.6448	0.635926	8.82328	level1	2'-O-Methylguanosine	4.06538	2.39092	5.8598	level1			hippuric acid	11.4802	3.76596	3.1198			6.87849	-0.2257	12.822	3.1073							Flonicamid	5e-06	-5.30103	24.9597	Propranolol hydrochloride	0.0005	-3.30103	24.9597	L-kynurenine	0.012475	-1.90396	50.9868
N,N-DIMETHYL-ARGININE	7.99088	1.10252	8.90262	level1	Car C4:0	3.96	3.16949	5.57596	level1	Glycerophosphoric acid	8.05027	0.708029	8.99047	level1			Tryptophan	4.89127	3.60527	6.73913			7.011	-0.2255	14.042	3.1291							Fipronil	5e-06	-5.30103	25.1208	Prosulfocarb	0.0005	-3.30103	25.1208	Phe-Phe	0.0124782	-1.90385	51.3158
D(+)-Melibiose monohydrate, 99+%	7.96803		8.94399	level1	Agmatine sulfate	8.10299		8.86157	level1	2-Hydroxy-5-sulfobenzoic acid dihydrate	5.3917	0.80597	7.51803	level1			2-Methylindole-3-acetic acid	13.2223	9.1217				8.365	-0.212	12.77	3.1539							Fipronil-sulfide	5e-06	-5.30103	25.2818	Pyrazophos	0.0005	-3.30103	25.2818	5-Hydroxydopamine	0.0126805	-1.89686	51.6447
Trehalose	7.96803		8.94399	level1	Asparagine	7.74825	0.716281	8.76924	level1	7-Methylxanthine	3.6	1.69196		level1			Alanine	7.26009		8.24283			8.913	-0.2105	14.011	3.1656							Penthiopyrad	5e-06	-5.30103	25.4428	Pyributicarb	0.0005	-3.30103	25.4428	2-Aminoadipic acid	0.0128775	-1.89017	51.9737
Glycerophosphoric acid	8.07534	0.674811	8.95612	level1	Biliverdin	15.8709	13.2756		level1	Carnitine	4.99175	0.74914	7.80316	level1			Hexadecanedioic acid	13.6	11.4				7.96803	-0.1963	20.539	3.1828							Chloro-3-oxa-perfluorononanesulfonic acid	5e-06	-5.30103	25.6039	Pyridaben	0.0005	-3.30103	25.6039	13-cis-acitretin	0.0130394	-1.88474	52.3026
Glutamylalanine	8.19838	0.925637	8.98719	level1	Car C2:0	4.7464		7.16248	level1	GLUCONOLACTONE	3.92919	0.795858	5.10559	level1			HOMOVANILLATE	10.38	1.59879	3.74734			7.9	-0.1901	12.086	3.2227							Fipronil Desulfinyl	5e-06	-5.30103	25.7649	Pyridaphenthion	0.0005	-3.30103	25.7649	Indole-3-acetic acid	0.0131297	-1.88174	52.6316
beta-Glycerophosphate disodium salt hydrate	8.07534	0.674811	9.01	level1	Ala-Leu	4.7481	3.19156	7.5534	level1	3-(1-Pyrazolyl)-L-alanine	5.69474		7.50979	level1			Homoarginine	8.46274		9.2732			5.95012	-0.177	13.7516	3.2511							Fipronil sulfone	5e-06	-5.30103	25.9259	Pyriftalid	0.0005	-3.30103	25.9259	Dormin	0.0131804	-1.88007	52.9605
H-Lys(me)2-oh hcl	8.26578	0.706708	9.1107	level1	Glycocholic acid sodium salt hydrate	3.86311	13.5402	6.18627	level1	3-Indoleacrylic acid		5.07936		level1			Dihydroxyacetone phosphate	9.32826		10.1645			3.90741	-0.1769	17.579	3.2938							Flunixin	5e-06	-5.30103	26.087	Pyrimethanil	0.0005	-3.30103	26.087	N-Acetyl-L-ornithine	0.0139194	-1.85638	53.2895
Aspartic acid	8.26404		9.11233	level1	N-Acetyl-L-glutamic acid	4.74113	0.709731		level1	Isoamyl salicylate	12.7314	7.71081		level1			Car C4:0	4.02	3.17739	5.69886			10.33	-0.1581	13.14	3.3055							Fluxapyroxad	5e-06	-5.30103	26.248	Pyrimidifen	0.0005	-3.30103	26.248	Spermidine	0.0144868	-1.83903	53.6184
glucuronic acid	8.11371	0.67498	9.14674	level1	GLUCONATE	7.62798	0.781563	8.63251	level1	Hydroxyproline	3.85261	0.84	5.40039	level1			Agmatine sulfate	7.96487		8.79			10.35	-0.1581	15.096	3.3207							Forchlorfenuron	5e-06	-5.30103	26.409	Pyriminobac-methyl	0.0005	-3.30103	26.409	Heneicosanoic acid	0.0162834	-1.78826	53.9474
(2S,3S,4S,5R)-2,3,4,5-tetrahydroxy-6-oxohexanoic acid	8.11371	0.67498	9.14674	level1	Citrulline	8.04088	0.76	8.8538	level1	ALLANTOIN	4.1243	0.809859	5.69551	level1			Serotonin	4.13967	1.69919	5.86076			6.86	-0.1581	14.015	3.3215							Isopyrazam	5e-06	-5.30103	26.57	Pyroquilon	0.0005	-3.30103	26.57	Gly-Phe	0.0166575	-1.77839	54.2763
GLUCURONATE	8.11371	0.67498	9.14674	level1	Hyoscyamine	12.0822	5.68119		level1	Epoxycholesterol	18.9744	16.4855	3.44798	level1			Asparagine	7.75587		8.67542			6.286	-0.1317	13.127	3.4103							Nitrendipine	5e-06	-5.30103	26.7311	Quinalphos	0.0005	-3.30103	26.7311	Ala-Gly	0.0182586	-1.73853	54.6053
N,N,N-TRIMETHYLLYSINE	8.31198	0.71	9.15701	level1	Guanosine 5'-monophosphate disodium salt	8.55551	0.804357	9.46775	level1	3-Methoxy-1,2-propanediol	4.82217	0.846072	7.10844	level1			Biliverdin	13.8179	11.68	2.10421			8.585	-0.0963	17.913	3.4455							1H,1H,2H,2H-Perfluorodecanesulfonic acid	5e-06	-5.30103	26.8921	Quinoxyfen	0.0005	-3.30103	26.8921	N-Acetyl-proline	0.0196342	-1.70699	54.9342
L-Cysteinesulfinic acid monohydrate	8.26768		9.2245	level1	1,2-Diheptadecanoyl-sn-glycero-3-phosphocholine	20.3304	20.014		level1	Pseudouridine	4.75501	1.10826	7.13757	level1			Car C2:0	4.72996		7.09038			8.589	-0.0963	16.006	3.4623							2,2’,4,4’-Tetrahydroxybenzophenone	5e-06	-5.30103	27.0531	Quizalofop-ethyl	0.0005	-3.30103	27.0531	Tryptophan	0.020409	-1.69018	55.2632
Carnosine	8.37721		9.26002	level1	CDCA	16.6882	14.6053		level1	P-OCTOPAMINE	4.29619		6.20468	level1			Ala-Leu	4.76328		7.59321			7.1499	-0.0891	12.623	3.4908							Bentazone	5e-06	-5.30103	27.2142	Rabenzazole	0.0005	-3.30103	27.2142	Histamine	0.0222643	-1.65239	55.5921
Homoarginine	8.46274		9.2732	level1	GLUTATHIONE REDUCED	8.02826	0.966239	9.11727	level1	N-acetyl cysteine	3.86507		5.4115	level1			Glycocholic acid sodium salt hydrate	3.98213	13.3396	6.16744			4.759	-0.0854	14.149	3.4981							Bisphenol S	5e-06	-5.30103	27.3752	Repaglinide	0.0005	-3.30103	27.3752	Carnosine	0.0226599	-1.64474	55.9211
Glu-glu	8.38865		9.29056	level1	OLEOYL-GLYCEROL	20.0084	17.4015		level1	N-Formylmethionine	3.71303	1.92068	4.00199	level1			N-Acetyl-L-glutamic acid	4.77781		7.43			3.492	-0.0642	19.966	3.5036							Ethiprole	5e-06	-5.30103	27.5362	Resmethrin	0.0005	-3.30103	27.5362	Mannitol	0.0227145	-1.6437	56.25
TARTRATE			9.29242	level1	delta-Hexalactone	4.80356	1.43507	7.15634	level1	AMINOISOBUTANOATE	8.07343		8.77	level1			GLUCONATE	7.66273		8.78247			4.76328	-0.0509	17.213	3.5537							Irbesartan	5e-06	-5.30103	27.6973	RhodamineB	0.0005	-3.30103	27.6973	Acetanilide	0.023637	-1.62641	56.5789
3-Methyl-L-histidine	8.39675	0.699908	9.30684	level1	2-Methylguanosine			6.46855	level1	L-methionine sulfoxide	7.49207		8.50601	level1			Citrulline	8.06824		8.76954			12.769	-0.0274	13.381	3.5918							Chlorantraniliprole	5e-06	-5.30103	27.8583	Rosiglitazone maleate	0.0005	-3.30103	27.8583	LPE 18:1	0.0239651	-1.62042	56.9079
l-glutamyl-l-threonine	8.35938	0.78	9.31013	level1	NORVALINE	4.86258	0.82	7.21239	level1	Glyceryl palmitate	17.7452	17.7452		level1			alpha-Guanidinoglutaric acid		1.00459				6.087	-0.0143	17.191	3.6385							Cyantraniliprole	5e-06	-5.30103	28.0193	Sedaxane	0.0005	-3.30103	28.0193	Taurochenodeoxycholic acid	0.024915	-1.60354	57.2368
Arginine	8.68919	0.701836	9.31309	level1	N-Acetyl-L-arginine	7.27264		8.05885	level1	hippuric acid	11.887	4.3038	3.1082	level1			Leucine	4.69086	1.51985	7.13323			6.839	0.0174	15.343	3.6569							Hydroxyhomosildenafil	5e-06	-5.30103	28.1804	Sethoxydim	0.0005	-3.30103	28.1804	N-Acetyl-L-valine	0.0249501	-1.60293	57.5658
Histidine	8.40817	0.696624	9.33466	level1	N-acetylneuramic acid	7.90039	0.718813	8.96136	level1	Tryptophan	4.77466	4.29322	6.85075	level1			1,2-Diheptadecanoyl-sn-glycero-3-phosphocholine	20.44	20.1791				3.907	0.0538	7.634	3.6629							Tralkoxidym	1e-05	-5	28.3414	Siduron	0.0005	-3.30103	28.3414	Phe-Trp	0.0249501	-1.60293	57.8947
PIPECOLATE	6.58031	0.82	9.43513	level1	Glycyl-L-valine	6.9314	1.37006	7.92519	level1	2-Methylindole-3-acetic acid	13.2405	8.4		level1			CDCA	16.7707	14.9				5.981	0.0543	16.972	3.6833							Atrazine	1e-05	-5	28.5024	Silthiofam	0.0005	-3.30103	28.5024	Serine	0.0249501	-1.60293	58.2237
Lysine	8.75516	0.670659	9.44369	level1	Valylserine	7.48375	1.44745	8.33861	level1	Alanine	7.09		8.33619	level1			OLEOYL-GLYCEROL	20.0342	17.2929				8.26578	0.1302	13.872	3.7063							Simazine	1e-05	-5	28.6634	S-Metolachlor	0.0005	-3.30103	28.6634	Alanine	0.0249501	-1.60293	58.5526
N-Methylacetoacetamide	8.68688	0.88055	9.54795	level1	4-GUANIDINOBUTANOATE	4.73		7.63798	level1	HOMOVANILLATE	10.4335	1.50163	3.7291	level1			delta-Hexalactone	4.69086	1.40067	7.13323			5.00209	0.1514	15.321	3.7117							Simetryn	1e-05	-5	28.8245	Spirotetramat-enol	0.0005	-3.30103	28.8245	D-Glucose	0.0249501	-1.60293	58.8816
Ornithine	8.70363	0.88055	9.54795	level1	Erucamide	21.2245	18.4592	1.06879	level1	Homoarginine	8.51973	0.754355	9.2845	level1			INDOLE-3-ACETATE	12.64	7.13403				7.36396	0.1549	14.203	3.7266							Moroxydine	1e-05	-5	28.9855	Sulfadimethoxine	0.0005	-3.30103	28.9855	Taurine	0.0250574	-1.60106	59.2105
PHOSPHORYLCHOLINE	8.66438		9.56053	level1	Xanthosine	4.6853	1.07104	7.37	level1	Dihydroxyacetone phosphate	8.06807		8.95	level1			1-HYDROXY-2-NAPHTHOATE	3.80968		1.38217			7.371	0.1549	17.64	3.7267							(E)-Dimethomorph	1e-05	-5	29.1465	Tebufenpyrad	0.0005	-3.30103	29.1465	D-2-Aminobutyric acid	0.0257144	-1.58982	59.5395
5-Hydroxy-DL-lysine	8.69582		9.62311	level1	Adenosine monophosphate	8.11751	0.890127	9.07724	level1	Car C4:0	3.91873	3.07337	5.59664	level1			2-Methylguanosine	4.20996		6.45202			12.071	0.1697	3.805	3.7415							2-Ethylhexyl 4-(dimethylamino)benzoate	1e-05	-5	29.3076	Tebutam	0.0005	-3.30103	29.3076	N-Acetyl-alanine	0.0262116	-1.58151	59.8684
Cystathionine	8.81		9.70247	level1	Car C3:0	4.54371	1.49698	6.25785	level1	Agmatine sulfate	8.00544		8.86835	level1			Aminocaproic acid	4.43246	1.38602	7.25425			4.94135	0.1984	16.843	3.7429							4,4'-Bis(diethylamino)benzophenone	1e-05	-5	29.4686	Tebuthiuron	0.0005	-3.30103	29.4686	Asparagine	0.0264682	-1.57727	60.1974
Cystine	8.86455		9.74568	level1	DIHYDROOROTATE	7.78761		8.77757	level1	Serotonin	4.13571		5.86564	level1			NORVALINE	4.94135		7.20402			6.58031	0.2131	17.428	3.7429							4-Isopropylthioxanthone	1e-05	-5	29.6296	Terbumeton	0.0005	-3.30103	29.6296	N-Acetyl-L-tyrosine	0.0278299	-1.55549	60.5263
Lanthionine	8.85		9.76609	level1	Inosine	4.22501	1.30073	6.31269	level1	Asparagine	7.74744		8.78923	level1			N-Acetyl-L-arginine	7.23393		8.0533			4.436	0.2574	17.4681	3.7429							7-Aminoflunitrazepam	1e-05	-5	29.7907	Terbuthylazine	0.0005	-3.30103	29.7907	Methionine	0.0298102	-1.52563	60.8553
Spermidine	9.07424	0.681359	10.0617	level1	Cytidine	4.60097		6.9239	level1	Car C2:0	4.69046	0.933355	7.14049	level1			N-acetylneuramic acid	7.914		8.79719			4.77781	0.2808	18.2	3.7433							Albendazole	1e-05	-5	29.9517	Terbutryn	0.0005	-3.30103	29.9517	N-Acetyl-methionine	0.0334358	-1.47579	61.1842
Dihydroxyacetone phosphate	9.32826		10.1645	level1	Cytidine 3'-monophosphate	8.31173		9.17401	level1	2'-O-Methylcytidine	4.01369	2.92742	5.17034	level1			Glycyl-L-valine	6.8591	1.55894	7.84759			4.81242	0.3539	16.091	3.7581							Alprenolol	1e-05	-5	30.1127	Testosterone	0.0005	-3.30103	30.1127	Serotonin	0.0351487	-1.45409	61.5132
N-Heptadecanoylsphingosine	23.3241	19.6622	1.02637	level1	1-Methylguanosine	4.14157	3.87	5.75834	level1	Glycocholic acid sodium salt hydrate	3.88114	13.3415	6.16329	level1			Valylserine	7.63982		8.22009			8.038	0.3738	16.017	3.7679							Amitriptyline	1e-05	-5	30.2738	Thiacloprid	0.0005	-3.30103	30.2738	PC(16:0/16:0)	0.0366781	-1.43559	61.8421
Hexadecanedioic acid	13.6	11.4	1.19478	level1	N,N-DIMETHYL-ARGININE	8.10873	1.3736	8.89316	level1	1-Methylguanine	4.14665	1.39145	4.62251	level1			4-GUANIDINOBUTANOATE	4.75817		7.50274			6.743	0.4196	17.613	3.7777							Atraton	1e-05	-5	30.4348	Thidiazuron	0.0005	-3.30103	30.4348	Methionine sulfoxide	0.0412615	-1.38446	62.1711
3-Hydroxymyristic Acid	17.4681	14.8	1.22381	level1	GUANINE	4.48992	1.49864	6.44823	level1	N-Acetyl-L-glutamic acid	4.73613	0.624811	7.46	level1			Dodecanedioic acid	14.7139	12.09				4.41	0.5039	16.483	3.7997							Buturon	1e-05	-5	30.5958	Thiobencarb	0.0005	-3.30103	30.5958	SM (d18:1/18:0)	0.0438359	-1.35817	62.5
alpha-Guanidinoglutaric acid		1.00459		level1	Glyceryl monostearate	21.145	18.9903		level1	GLUCONATE	7.68273	0.749566	8.58561	level1			FANH2 22:1	21.1687	18.6148				4.631	0.5415	12.765	3.8013							Cadusafos	1e-05	-5	30.7568	Timolol	0.0005	-3.30103	30.7568	N-Acetylneuraminic acid	0.0463659	-1.3338	62.8289
GLUTARYLCARNITINE	4.91579	1.22879		level1	N-ALPHA-ACETYLLYSINE	7.33401		8.20758	level1	Citrulline	7.91549		8.85195	level1			Xanthosine dihydrate	4.72288		7.2653			7.07668	0.545	14.675	3.8098							Chlorotoluron	1e-05	-5	30.9179	Triadimefon	0.0005	-3.30103	30.9179	Threonine	0.0475938	-1.32245	63.1579
4-COUMARATE	6.36963	1.24857		level1	Glucose 6-phosphate	8.64736	0.685805	9.55718	level1	N-acetylcadaverine	4.53235	1.08433	6.51816	level1			Car C3:0	4.35	1.6	6.24494			4.854	0.5455	20.908	3.8231							Chlorpromazine	1e-05	-5	31.0789	Triamiphos	0.0005	-3.30103	31.0789	N6-succinyl-Adenosine	0.0477929	-1.32064	63.4868
Indoline	4.59624	2.39206		level1	Phloretin	12.7329	9.77948		level1	Leucine	4.72022		6.95977	level1			DIHYDROOROTATE	7.82276		8.74549			4.479	0.6315	14.42	3.8261							Cyflufenamid	1e-05	-5	31.2399	Triazophos	0.0005	-3.30103	31.2399	DiFA 14:0	0.0484093	-1.31507	63.8158
2-Hydroxy-6-methylnicotinic acid		2.86947		level1	2'-Deoxyinosine	3.97363	3.15537	5.2816	level1	Monoisobutyl phthalate	12.63	8.63845		level1			Inosine	4.36199	1.33373	6.33016			7.956	0.6814	14.927	3.8792							Cyprodinil	1e-05	-5	31.401	Tribufos	0.0005	-3.30103	31.401	Aspartic Acid	0.0499002	-1.3019	64.1447
N6-Methyladenosine		3.25475		level1	N6-succinyl-Adenosine	5.10285	1.0513	7.81	level1	delta-Hexalactone	4.8479		7.16952	level1			L-homoserine	7.69228	1.04091	8.21419			7.489	0.7284	19.541	3.8856							Diazepam	1e-05	-5	31.562	Trifloxystrobin	0.0005	-3.30103	31.562	5'-Cytidylic acid	0.0499002	-1.3019	64.4737
2-phenylacetamide	11.43	3.75711		level1	1-O-Hexadecyl-sn-glycero-3-phosphocholine	19.9326	17.2112	5.63602	level1	1-Methyladenine	4.59262		6.03484	level1			N,N-DIMETHYL-ARGININE	7.99088	1.10252	8.90262			4.9634	0.7353	19.883	3.9145							Diazinon	1e-05	-5	31.723	Triflumizole-amino	0.0005	-3.30103	31.723	S-adenosyl-L-homocysteine	0.0499002	-1.3019	64.8026
trans-Zeatin		4.16877		level1	N6-Methyladenosine	3.7	3.21948		level1	INDOLE-3-ACETATE	12.5634	7.11016	1.1279	level1			trans-Zeatin		4.16877				8.368	0.7408	19.174	3.9343							Dimoxystrobin	1e-05	-5	31.8841	Crufomate	0.0005	-3.30103	31.8841	P-cresyl glucuronide	0.049969	-1.3013	65.1316
3-Indoleacrylic acid	11.7358	5.1026		level1	Car C5:0	3.89	4.77	5.24448	level1	2-Methylguanosine	4.47823	2.6381	6.56238	level1			N-ALPHA-ACETYLLYSINE	7.37467		8.17344			3.886	0.7599	3.774	3.9655							Enilconazole	1e-05	-5	32.0451	Chloramphenicol	0.0005	-3.30103	32.0451	quinic acid	0.05	-1.30103	65.4605
2-Hydroxyquinoline		6.553		level1	Guanidinosuccinic acid	7.94736		8.80464	level1	QUINOLINE	13.907	10.51		level1			1-O-Hexadecyl-sn-glycero-3-phosphocholine	19.8844	17.1457	5.63362			4.824	0.7894	11.883	3.9706							Ethopabate	1e-05	-5	32.2061	Fipronil	0.0005	-3.30103	32.2061	glucuronic acid	0.05	-1.30103	65.7895
INDOLE-3-ACETATE	12.64	7.13403		level1	Hypotaurine	6.82496		8.0655	level1	NORVALINE	4.93064		7.26619	level1			N6-Methyladenosine		3.25475				4.857	0.8215	18.608	3.9872							Ethoprophos	1e-05	-5	32.3671	Fipronil-sulfide	0.0005	-3.30103	32.3671	tryptamine	0.05	-1.30103	66.1184
Benzocaine	12.7571	7.6036		level1	Car C6:0	3.73297	6.50395	4.99103	level1	N-Acetyl-L-arginine	7.19664	1.17312	8.09585	level1			Car C5:0	3.86	4.62	5.30654			4.759	0.8621	16.855	3.9953							Fenazaquin	1e-05	-5	32.5282	Fludioxonil	0.0005	-3.30103	32.5282	guanidineacetic acid	0.05	-1.30103	66.4474
3-phenylpropionic acid	12.78	8.10668		level1	maleic acid	5.06186	0.950339	1.76	level1	N-acetylneuramic acid	7.94713	0.804607	8.89373	level1			Guanidinosuccinic acid	7.90788		8.77			3.675	0.8809	17.136	4.0005							Fenbendazole	1e-05	-5	32.6892	Penthiopyrad	0.0005	-3.30103	32.6892	3,4-dihydroxyphenylacetic acid	0.05	-1.30103	66.7763
3-(3,4-dimethoxyphenyl) propionic acid	12.5046	8.31748		level1	Taurocholic acid	4.37116	13.5		level1	Valylserine	7.4243	1.08296	8.23415	level1			Hypotaurine	6.97398		8.02228			4.908	0.9192	20.368	4.0286							Finasteride	1e-05	-5	32.8502	Perfluorobutanesulfonic acid	0.0005	-3.30103	32.8502	Deoxycytidine	0.05	-1.30103	67.1053
3-Indolepropionic acid	13.0873	9.1217		level1	cinnamic acid	4.89348	2.59145	7.17872	level1	4-GUANIDINOBUTANOATE	4.71076	0.831517	7.57857	level1			Car C6:0	3.76	6.59	4.76285			13.89	1.0514	19.18	4.0313							Flutolanil	1e-05	-5	33.0113	Perfluoroheptanesulfonic acid	0.0005	-3.30103	33.0113	sarcosine	0.05	-1.30103	67.4342
2-Methylindole-3-acetic acid	13.2223	9.1217		level1	Phe-Pro	4.74882	6.79879	6.79	level1	Dodecanedioic acid	11.9453	6.52978	1.36059	level1			GAMMA-LINOLENATE	18.741	16.12				3.907	1.0522	16.537	4.039							Flutriafol	1e-05	-5	33.1723	Perfluorohexanesulfonate (PFHxS)	0.0005	-3.30103	33.1723	N-carbamoyl-DL-aspartic acid	0.05	-1.30103	67.7632
4-Oxononanoic acid	13.3566	9.23434		level1	Glutamic acid	7.83674	0.702592	8.73371	level1	Genistein	13.24	9.57042		level1			Taurocholic acid		12.6206				24.15	1.083	18.639	4.0501							Fluxapyroxad	1e-05	-5	33.3333	Perfluorononanoic acid	0.0005	-3.30103	33.3333	Ophthalmic acid	0.05	-1.30103	68.0921
Cortisone	13.2399	9.75465		level1	5'-methylthioadenosine		4.46784		level1	Erucamide	23.0147	19.7909		level1			cinnamic acid	4.7111	2.41863	6.97432			4.681	1.1254	19.748	4.074							Furmecyclox	1e-05	-5	33.4944	Ethyl 4-dimethylaminobenzoate	0.001	-3	33.4944	4-hydroxy-3,5-dimethoxybenzoic acid(syringic acid)	0.05	-1.30103	68.4211
CORTISOL	13.4478	10.0935		level1	CDP-ETHANOLAMINE	8.85196		9.76426	level1	Xanthosine	4.62499	1.10436	7.29618	level1			Phe-Pro	4.67763	5.64618	6.90406			5.319	1.1983	19.977	4.091							Haloxyfop-P-methyl	1e-05	-5	33.6554	Hydroxyprogesterone caproate	0.001	-3	33.6554	erythronic acid	0.05	-1.30103	68.75
Gamma-nonalactone	14.0567	10.5674		level1	GDCA	17.226	14.4882		level1	L-Methionine sulfone	6.67033		7.8	level1			3-Hydroxybutyric acid	6.86		7.89499			11.883	1.2472	16.688	4.2178							Isoxaben	1e-05	-5	33.8164	(2-nitro-phenyl)-[1,4]benzoquinone	0.001	-3	33.8164	4-hydroxyphenyllactic acid	0.05	-1.30103	69.0789
corticosterone（肾上腺）皮质脂酮	14.1013	11.0636		level1	Sphingosine	20.5208	17.9635		level1	Adenosine monophosphate	8.05946		9.03476	level1			Glutamic acid	7.90114		8.7104			12.273	1.2662	16.582	4.2376							Isoxathion	1e-05	-5	33.9775	2,4-Diethyl-9H-thioxanthen-9-one	0.001	-3	33.9775	thiamine	0.05	-1.30103	69.4079
METHYL JASMONATE	14.8671	11.6278		level1	1-Nonadecanoyl-sn-glycero-3-phosphocholine	20.5366	17.7594	5.37526	level1	Car C3:0	4.39	1.6	6.32033	level1			OXALOMALATE	7.73837		8.47			8.319	1.2787	19.467	4.2401							Isoxsuprine	1e-05	-5	34.1385	2-Hydroxy-4-methoxybenzophenone	0.001	-3	34.1385	purine	0.05	-1.30103	69.7368
Dodecanedioic acid	14.7139	12.09		level1	Glycyl-L-tyrosine	7.24373	1.70754	8.1195	level1	Inosine	4.41207	1.47938	6.27695	level1			phenyl-glucuronide	4.57231	2.79	7.02663			7.87	1.3046	15.464	4.2419							Linuron	1e-05	-5	34.2995	4-Chloro-5-(p-tolyl)-1H-imidazole-2-carbonitrile	0.001	-3	34.2995	succinate	0.05	-1.30103	70.0658
Testosterone	14.927	12.2224		level1	Indole-3-lactic acid	11.6454			level1	Cytidine	4.62392		6.92496	level1			GDCA	16.8638	14.2764	4.8557			12.21	1.3687	20.066	4.2693							Matrine	1e-05	-5	34.4605	Acebutolol	0.001	-3	34.4605	indole-3-carboxylic acid	0.05	-1.30103	70.3947
Taurocholic acid		12.6206		level1	Oleoyl-lysophosphatidic acid	19.8566	16.9534		level1	PHENYLETHANOLAMINE	3.9		5.72502	level1			Trigonelline			7.34793			4.25044	1.3687	16.64	4.2727							Mepanipyrim	1e-05	-5	34.6216	Acepromazine	0.001	-3	34.6216	5-hydroxy-tryptophan	0.05	-1.30103	70.7237
tauro-beta-muricholic acid (晓琳姐母液)		12.6206		level1	1-O-Octadecyl-SN-glycero-3-phosphocholine	20.6025	17.7821	5.44434	level1	Cytidine 3'-monophosphate	8.35269		9.27645	level1			1-Nonadecanoyl-sn-glycero-3-phosphocholine	20.4846	17.819	5.34734			12.658	1.406	19.01	4.2728							Mepronil	1e-05	-5	34.7826	Acetochlor	0.001	-3	34.7826	3-(3,4-dimethoxyphenyl) propionic acid	0.05	-1.30103	71.0526
Ethyl 3,4-dihydroxybenzoate	15.316	12.6275		level1	N-METHYLGLUTAMATE	7.6009		8.43851	level1	Nicotinamide N-oxide	3.94408		4.45993	level1			3-hydroxyhippuric acid	10.39	4.32	2.44719			7.307	1.4153	13.84	4.2747							Metoprolol	1e-05	-5	34.9436	Acridine orange	0.001	-3	34.9436	gallic acid	0.05	-1.30103	71.3816
PREGNENOLONE SULFATE	15.2662	12.94		level1	SPERMINE	7.08951		6.90358	level1	1-Methylguanosine	4.10736	3.84453	5.76901	level1			Indole-3-lactic acid	11.614	4.23	2.18022			3.816	1.4505	15.747	4.2896							Metoxuron	1e-05	-5	35.1047	Aildenafil	0.001	-3	35.1047	deoxyuridine	0.05	-1.30103	71.7105
Car C12:0	16.6019	14.0365		level1	Diminazene aceturate		3.75601		level1	Phenylacetylglycine	11.6571	4.36445	2.79065	level1			Oleoyl-lysophosphatidic acid	19.5065	17.02				10.34	1.4554	19.5	4.2977							Monolinuron	1e-05	-5	35.2657	Alachlor	0.001	-3	35.2657	N6,N6,N6-trimethyl-lysine	0.05	-1.30103	72.0395
Sodium deoxycholate	16.7707	14.9		level1	Taurine	6.46027	0.766078	7.93569	level1	N,N-DIMETHYL-ARGININE	8.12246	1.17584	8.91118	level1			N-methyl-D-leucine	4.52185		6.48496			10.4	1.4591	14.538	4.3319							morpholinopropiophenone	1e-05	-5	35.4267	Androstenedione	0.001	-3	35.4267	phenyllactic acid	0.05	-1.30103	72.3684
CDCA	16.7707	14.9		level1	Car C16:0	19.1874	16.3699		level1	GUANINE	4.64398		6.48512	level1			1-O-Octadecyl-SN-glycero-3-phosphocholine	20.5967	17.8564	5.47527			4.38559	1.5155	13.7	4.342							N,N-Dimethyl-N'-p-tolylsulphamide	1e-05	-5	35.5878	Aspon	0.001	-3	35.5878	malonic acid	0.05	-1.30103	72.6974
12-Hydroxyeicosatetraenoic acid	17.557	15.04		level1	tauro-beta-muricholic acid (晓琳姐母液)	4.15391	12.5345	6.16303	level1	N-ALPHA-ACETYLLYSINE	7.4098	0.896292	8.2822	level1			N-METHYLGLUTAMATE	7.54392		8.60688			4.919	1.5966	15.2662	4.3424							Penbutolol	1e-05	-5	35.7488	Auramine O	0.001	-3	35.7488	indole-3-carboxaldehyde	0.05	-1.30103	73.0263
Car C14:0	17.913	15.367		level1	Adenosine-5'-diphosphate	9.44822		9.85	level1	2'-Deoxyinosine	3.7884	3.26886	5.2906	level1			SPERMINE			6.80997			4.954	1.6312	14.643	4.4223							Piperophos	1e-05	-5	35.9098	Bambuterol	0.001	-3	35.9098	N-acetyl glucosamine	0.05	-1.30103	73.3553
Calendic acid	18.741	16.12		level1	N-Acetyl-L-methionine	10.3002	2.87349		level1	Normetanephrine hydrochloride	4.25331	6.15339	6.10185	level1			3-phenylpropionic acid	12.78	8.10668				5.58	1.6324	15.617	4.4451							Pretilachlor	1e-05	-5	36.0709	Benodanil	0.001	-3	36.0709	3-methylcrotonylglycine	0.05	-1.30103	73.6842
GAMMA-LINOLENATE	18.741	16.12		level1	Sclareol	19.8754	17.0672		level1	N6-succinyl-Adenosine	5.00616	3.16172	7.76	level1			Taurine	6.10031		7.85318			14.596	1.6435	13.34	4.4597							Prometryn	1e-05	-5	36.2319	Bensulfuron methyl	0.001	-3	36.2319	3-hydroxy-4-methoxymandelic acid	0.05	-1.30103	74.0132
Docosahexaenoic acid	19.1993	16.69		level1	H-Lys(me)2-oh hcl	8.31292		9.164	level1	Sepiapterin	3.99113	4.51689	5.63056	level1			Car C16:0	18.9865	16.3823	3.47194			8.271	1.6483	19.58	4.4604							Propazine	1e-05	-5	36.3929	Benzoylprop-ethyl	0.001	-3	36.3929	orotic acid	0.05	-1.30103	74.3421
Calcifediol monohydrate	19.4556	16.7178		level1	BIOTIN	7.69762		8.6	level1	N6-Methyladenosine	3.6427	3.21535	3.47643	level1			2-Hydroxy-6-methylnicotinic acid		2.86947				4.47399	1.731	16.996	4.4779							Propisochlor	1e-05	-5	36.5539	Bromfenvinphos	0.001	-3	36.5539	hippuric acid	0.05	-1.30103	74.6711
Oleoyl-lysophosphatidic acid	19.5065	17.02		level1	3-Aminopiperidin-2-one		0.7	7.24688	level1	Maltitol	7.78118	0.842605	8.77523	level1			tauro-beta-muricholic acid (晓琳姐母液)		12.6206				7.87	1.7497	16.7707	4.4779							Prosulfocarb	1e-05	-5	36.715	Brompheniramine	0.001	-3	36.715	glyceric acid	0.05	-1.30103	75
Dihomo-gamma-linolenic acid	19.4455	17.04		level1	L-kynurenine	4.78768	2.12785	6.86	level1	Car C5:0	3.9	4.46	5.32376	level1			H-Lys(me)2-oh hcl	8.26578		9.1107			5.459	1.7526	16.7707	4.4779							Pyributicarb	1e-05	-5	36.876	Butralin	0.001	-3	36.876	citrulline	0.05	-1.30103	75.3289
Car C18:0	19.8556	17.1516		level1	3-Hexenedioic acid	7.88252		8.94202	level1	Guanidinosuccinic acid	7.81037	0.762141	8.77091	level1			cinnamoylglycine	12.1992	6.48	2.44709			6.398	1.7663	16.21	4.4815							Pyrimethanil	1e-05	-5	37.037	Carazolol	0.001	-3	37.037	3,4,5-trimethoxybenzoic acid	0.05	-1.30103	75.6579
OLEOYL-GLYCEROL	20.0342	17.2929		level1	1-Palmitoyl-2-hydroxy-SN-glycero-3-phosphate(sodium salt)	19.5078	16.706	5.59683	level1	Car C6:0	3.74605	6.5464	5.02518	level1			2-(2-Benzylphenoxy)-N,N,N-trimethylethan-1-aminium iodide	13.2174	9.91	4.53684			4.525	1.8287	20.769	4.5153							Quinalphos	1e-05	-5	37.1981	Chlormequat chloride	0.001	-3	37.1981	homoserine	0.05	-1.30103	75.9868
Linoleoyl ethanolamide	20.3515	17.6052		level1	3,4,5-Trimethoxycinnamic acid	12.7394			level1	Hydantoin-5-propionic acid	3.69199	0.838341	4.87165	level1			3-Aminopiperidin-2-one	5.59238					3.762	1.856	17.9	4.5231							Quizalofop-ethyl	1e-05	-5	37.3591	Chlorpheniramine maleate	0.001	-3	37.3591	cinnamic acid	0.05	-1.30103	76.3158
Desmosterol	21.4848	17.7738		level1	CITICOLINE	8.80731	0.730617	9.69745	level1	cinnamic acid	4.68989	2.51601	6.94851	level1			3-Hexenedioic acid	8.02717	2.84205	8.85863			4.782	1.8595	19.09	4.5247							Resmethrin	1e-05	-5	37.5201	Chlorpyrifos	0.001	-3	37.5201	5'-methylthioadenosine	0.05	-1.30103	76.6447
Methyl arachidonate	20.8403	17.9257		level1	L-Aspartyl-L-phenylalanine	7.35327	3.87734	8.1642	level1	Phe-Pro	4.68697	5.54948	6.88276	level1			1-Palmitoyl-2-hydroxy-SN-glycero-3-phosphate(sodium salt)	3.70884	16.78	5.75862			13.962	1.959	20.539	4.5286							RhodamineB	1e-05	-5	37.6812	Cinosulfuron	0.001	-3	37.6812	indoleacetylglycine	0.05	-1.30103	76.9737
Erucic acid	21.6325	18.55		level1	L-Saccharopine	8.79		9.6816	level1	3-Hydroxybutyric acid	6.79883		7.90826	level1			L-Aspartyl-L-phenylalanine	7.34222	3.90835	8.13268			3.72885	2.1154	17.659	4.5481							Tebufenpyrad	1e-05	-5	37.8422	Clenpenterol hydrochloride	0.001	-3	37.8422	2-hydroxybenzoic acid	0.05	-1.30103	77.3026
FANH2 22:1	21.1687	18.6148		level1	Glutamine	7.8031	0.861018	8.70262	level1	Glutamic acid	8.10476	0.701785	8.75936	level1			Glutamine	7.79454		8.72708			3.834	2.2031	16.568	4.5817							Terbumeton	1e-05	-5	38.0032	Clethodim Sulfoxide	0.001	-3	38.0032	5-(4-hydroxyphenyl) valeric acid	0.05	-1.30103	77.6316
2-azaniumylethyl [(2R)-2-hydroxy-3-[(Z)-octadec-1-enoxy]propyl] phosphate	21.5934	18.64		level1	5-Aminolevulinic acid hydrochloride	3.88		4.88411	level1	FRUCTOSE 6-PHOSPHATE	8.7905	0.677523	9.67807	level1			5-Aminolevulinic acid hydrochloride	3.88		4.85268			3.856	2.2295	17.623	4.5944							Thidiazuron	1e-05	-5	38.1643	Cloquintocet - mexyl	0.001	-3	38.1643	glutamine	0.05	-1.30103	77.9605
1,2-Dimyristoyl-sn-glycero-3-phosphocholine	22.0828	18.9963		level1	S-adenosyl-L-homocysteine	8.00781	3.68093	8.76524	level1	Tiglylglycine	11.8114	3.56755	3.13988	level1			S-adenosyl-L-homocysteine	7.9		8.71526			3.80968	2.2436	15.525	4.6063							Tribufos	1e-05	-5	38.3253	Cumyluron	0.001	-3	38.3253	N-isovalerylglycine	0.05	-1.30103	78.2895
1,2-Diheptadecanoyl-sn-glycero-3-phosphocholine	20.44	20.1791		level1	N,N,N-TRIMETHYLLYSINE	8.31418	0.708461	9.39063	level1	5'-methylthioadenosine	11.8787	4.43503		level1			N,N,N-TRIMETHYLLYSINE	8.31198		9.15701			12.554	2.2524	13.6	4.617							(2-nitro-phenyl)-[1,4]benzoquinone	1e-05	-5	38.4863	Cyanazine	0.001	-3	38.4863	2-Hydroxyquinoline	0.0579852	-1.23668	78.6184
cis-Aconitic acid	3.93604	0.596585		level1	Pro-leu	4.74608	5.54941	7.17	level1	phenyl-glucuronide	4.51629	2.8246	7.00434	level1			Pro-leu	4.81242		7.26415			8.852	2.291	19.41	4.6629							2,4-Diethyl-9H-thioxanthen-9-one	1e-05	-5	38.6473	Cycloxydim	0.001	-3	38.6473	Asp-Leu	0.0615304	-1.21091	78.9474
N-ACETYLASPARTATE	4.65517	0.667716		level1	ANILINE-2-SULFONATE	3.86912	0.95678	5.7024	level1	GDCA			4.90073	level1			12-Hydroxyeicosatetraenoic acid	17.557	15.04				14.913	2.3006	16.298	4.6829							Acepromazine	1e-05	-5	38.8084	Cyprazine	0.001	-3	38.8084	N-Acetyl-isoleucine	0.0649144	-1.18766	79.2763
Gluceptate sodium dihydrate	8.00446	0.806866		level1	12-Hydroxyeicosatetraenoic acid	17.462	15.2274		level1	Trigonelline	5.37517	0.755906	7.48963	level1			3-Hydroxyglutaric Acid	4.34136		2.27075			13.348	2.3218	19.8278	4.7135							Acridine orange	1e-05	-5	38.9694	Cyproconazole	0.001	-3	38.9694	Asp-Glu	0.06552	-1.18363	79.6053
3-Aminopiperidin-2-one	5.59238	0.925749		level1	URIDINE 5'-DIPHOSPHATE	8.96197		9.892	level1	1-Nonadecanoyl-sn-glycero-3-phosphocholine	20.5011	17.8419	5.36284	level1			Asp-Leu	7.46142	3.55776	8.14846			12.67	2.3979	19.207	4.7457							Aspon	1e-05	-5	39.1304	Desmethyl Norflurazon	0.001	-3	39.1304	5-Formylsalicylic acid	0.0663695	-1.17803	79.9342
prostaglandin D2	13.7516			level1	Asp-Leu	7.16397	3.54076	8.05096	level1	N-ACETYLPUTRESCINE	4.78027	0.889632	6.80276	level1			(+)-Diethyl L-tartrate			1.95			13.732	2.3979	14.708	4.7774							Auramine O	1e-05	-5	39.2915	Difenoconazole	0.001	-3	39.2915	N-Acetyl-L-leucine	0.0691992	-1.1599	80.2632
9Cl-PF3ONS (9-chlorohexadecafluoro-3-oxanonane-1-sulfonate) (major component of F-53B)	16.922	14.61	0.798	level2	Adenylosuccinic acid	8.597	0.601	9.526	level2	3-hydroxyhippuric acid	3.69525	4.26894		level1			Metformin			5.512			3.826	2.4283	3.711	4.8133							Butralin	1e-05	-5	39.4525	Difloxacin hydrochloride	0.001	-3	39.4525	cis-Aconitic acid	0.0695634	-1.15762	80.5921
PFSA-perfluoroalkyl_branched_C3; C8HF17O3S	16.55	14.15	0.803	level2	D-Fructose 1,6-bisphosphate	9.113	0.601	10.115	level2	Indole-3-lactic acid	12.3515	6.19436		level1			1,3,8-Trimethyl-3,9-dihydro-1H-purine-2,6-dione		4.842				3.777	2.4611	19.778	4.829							Chlorpheniramine maleate	1e-05	-5	39.6135	Diflufenican	0.001	-3	39.6135	2-Isopropylmalic acid	0.0703838	-1.15253	80.9211
PFSA-perfluoroalkyl_branched_C3; C6HF13O3S	14.77	12.358	0.815	level2	alpha-D-Glucose-1,6-diphosphate potassium salt hydrate	9.457	0.601	10.115	level2	3-methoxybenzoic acid	11.65	3.86959	1.6483	level1			beta-Alanine; AIF; CE0; MS2Dec			8.053			20.41	2.4723	16.376	4.8303							Clenpenterol hydrochloride	1e-05	-5	39.7746	Diphenhydramine hydrochloride	0.001	-3	39.7746	Androsterone	0.0724113	-1.14019	81.25
Acetyl tributyl citrate	18.079	15.482	0.945	level2	Dihydroxyacetone phosphate	7.914	0.611	8.757	level2	N-methyl-D-leucine	4.55261		6.06363	level1			Tetraethylene glycol monomethyl ether			1.397			4.804	2.5267	16.55	4.8411							Cumyluron	1e-05	-5	39.9356	Disulfoton sulfone	0.001	-3	39.9356	5-Hydroxyindole-3-acetic acid	0.0763759	-1.11704	81.5789
Perfluorooctanoic acid (PFOA)	15.617	13.041	0.949	level2	2-METHYLCITRATE	4.027	0.618	8.374	level2	N-Acetylhistamine	4.39346	0.891286	5.96617	level1			Dihydroaspyrone			1.397			8.745	2.5349	16.516	4.8411							Cyprazine	1e-05	-5	40.0966	Droperidol	0.001	-3	40.0966	D-Glucose 1-phosphate	0.0780089	-1.10786	81.9079
Perfluoroheptanoic acid	14.675	12.248	0.965	level2	CITRIC ACID	8.512	0.618	9.386	level2	N-METHYLGLUTAMATE	7.48912	0.819922	8.40095	level1			Acesulfame		2.022				8.776	2.537	16.803	4.849							Cyproconazole	1e-05	-5	40.2576	Ethametsulfuron-methyl	0.001	-3	40.2576	Fumaric acid	0.0927513	-1.03268	82.2368
Tri(butoxyethyl) phosphate	17.623	15.063	0.967	level2	6-Phosphogluconic acid	9.468	0.618	9.933	level2	Taurine	6.11923	0.797315	7.86128	level1			DL-2-Hydroxyvaleric acid sodium salt hydrate		1.199	1.931			8.583	2.5599	19.208	4.8624							Diphenhydramine hydrochloride	1e-05	-5	40.4187	Fenhexamid	0.001	-3	40.4187	Cystine	0.0959501	-1.01795	82.5658
2,2'-Methylene-bis(6-tert-butyl-4 methylphenol)	20.586	18.272	0.975	level2	D-2-Phosphoglyceric acid	8.626	0.625	9.488	level2	H-Lys(me)2-oh hcl	8.29923	0.704425	9.13883	level1			GLUTARIC ACID			2.987			5.005	2.568	17.936	4.871							Fenpropimorph	1e-05	-5	40.5797	Fenpropimorph	0.001	-3	40.5797	Glu-glu	0.0998004	-1.00087	82.8947
FA 26:0;O	21.076	18.381	1.007	level2	3-PHOSPHOGLYCERIC ACID	8.626	0.625	9.67	level2	cinnamoylglycine		6.50753		level1			2,5-dihydroxybenzenesulfonate		3.031	1.399			16.233	2.5778	20.987	4.8712							Flunixin	1e-05	-5	40.7407	Fensulfothion	0.001	-3	40.7407	uridine 5‘-monosphosphate UMP	0.1	-1	83.2237
Bilirubin; LC-tDDA; CE30	14.201	17.766	1.009	level2	2,4-Thiazolidinedione, 5-[[3-(trifluoromethyl)phenyl]methylene]-, (5Z)-	9.055	0.632	2.515	level2	3-Aminopiperidin-2-one	5.54859	1.05619	7.22564	level1			trans-3'-Hydroxycotinine			1.898			14.913	2.5943	17.758	4.8803							Fluopicolide	1e-05	-5	40.9018	Fensulfothion-oxon	0.001	-3	40.9018	2,6-diaminopimelic acid	0.1	-1	83.5526
FA 25:0;O	20.714	18.108	1.009	level2	Phospho(enol)pyruvic acid	8.091	0.632	9.099	level2	indoleacetylglycine	11.791	5.10943		level1			Trifluoromethanesulfonic acid		1.261				9.124	2.6084	16.32	4.8811							Griseofulvin	1e-05	-5	41.0628	Fenthion sulfone	0.001	-3	41.0628	indolin-2-one	0.1	-1	83.8816
4-tert-Butyl-N-(4-nitrophenyl)benzamide	20.539		1.013	level2	Citraconic Acid	3.89	0.638	8.38	level2	L-kynurenine	4.73	2.05097	6.84547	level1			Kifunensine	12.932					14.312	2.645	20.3515	4.9084							Irbesartan	1e-05	-5	41.2238	Fluazifop-butyl	0.001	-3	41.2238	3-hydroxycinnamic acid	0.1	-1	84.2105
3-Hydroxy-3',4'-Dimethoxyflavone	20.539		1.013	level2	[4-Bromo-5-methyl-3-(trifluoromethyl)-1H-pyrazol-1-yl]acetic acid	8.662	0.64	9.717	level2	N-Ethylglycine	6.00899		7.76172	level1			Myo-Inositol	7.728		8.882			9.132	2.6465	19.078	4.9118							Leucomalachite green	1e-05	-5	41.3849	Flunixin	0.001	-3	41.3849	5-hydroxyindole	0.1	-1	84.5395
N-Palmitoyl-D-sphingosine	22.94	19.427	1.017	level2	SPERMINE	7.079	0.641	6.902	level2	L-Aspartyl-L-phenylalanine	7.48275	2.08922	8.17868	level1			3-(2-Pyrimidinyl)propanoic acid		2.918				8.05	2.7113	20.0342	4.9203							Loratadine	1e-05	-5	41.5459	Fluopicolide	0.001	-3	41.5459	itaconic acid	0.1	-1	84.8684
FA 20:4	19.245	16.851	1.018	level2	Uridine-5???-diphosphoglucuronic acid trisodium salt	9.117	0.649	10.134	level2	5-Methylcytidine	4.73701	1.00968	6.52488	level1			E-N-Deoxyfructosyllysine	8.854		9.787			18.539	2.7808	20.087	4.9215							Mapenterol Hydrochloride	1e-05	-5	41.7069	Fosthiazate	0.001	-3	41.7069	Guanosine	0.1	-1	85.1974
Arachidonic acid	19.245	16.851	1.018	level2	D-myo-Inositol-1,5-diphosphate	9.103	0.678		level2	Nicotinuric acid	4.71609	1.71131		level1			N-Acetylneuraminic acid	7.958		8.969			7.127	2.7999	21.061	4.9545							Megestrol acetate	1e-05	-5	41.868	Griseofulvin	0.001	-3	41.868	Arabinose	0.1	-1	85.5263
Trans-Vaccenic acid	19.799	17.343	1.023	level2	NEPSILON,NEPSILON,NEPSILON-TRIMETHYLLYSINE	8.36	0.682		level2	imidazole propionate	4.61041	0.91368	7.68364	level1			Muramic acid	8.022		8.971			6.204	2.8032	16.739	4.9635							Methyltestosterone	1e-05	-5	42.029	Hexaconazole	0.001	-3	42.029	adenosine 5‘-monosphosphate AMP	0.1	-1	85.8553
FA 18:1	19.799	17.343	1.023	level2	.alpha.-D-Galactose 1-phosphate	8.967	0.687	9.57	level2	L-Saccharopine	8.83779		9.66555	level1			D-Ribose	6.142		7.875			6.142	2.898	17.252	4.9635							Metobromuron	1e-05	-5	42.19	Hydroquinidine	0.001	-3	42.19	Indole-3-pyruvic acid	0.101326	-0.994277	86.1842
FA 18:2	19.604	18.292	1.023	level2	MANNOSE 6-PHOSPHATE	8.672	0.687	9.693	level2	Glutamine	7.6697	0.806991	8.58877	level1			N-Acetyl-D-galactosaminitol	4.673		8.345			17.936	2.9207	17.252	4.9635							Metolcarb	1e-05	-5	42.351	Hydroxyzine dihydrochloride	0.001	-3	42.351	5-Methyluridine	0.10317	-0.986446	86.5132
NAE 20:1	19.819	17.104	1.027	level2	D-(+)-Malic acid	4.681	0.691	8.076	level2	5-Aminolevulinic acid hydrochloride	5.02509		7.85228	level1			2-Hydroxybenzoic acid sulfate			2.316			4.726	2.9217	18.155	4.9728							Metrafenone	1e-05	-5	42.5121	Indoxacarb	0.001	-3	42.5121	Glu-Leu	0.10399	-0.983007	86.8421
Gliclazide	14.236	11.359	1.035	level2	D-Ribose-5-phosphate disodium salt hydrate	8.254	0.694	9.203	level2	Geranic acid	13.229	10.3977		level1			5-Methoxysalicylic acid sulfate			2.708			4.896	2.9228	19.8556	5.0059							Naproanilide	1e-05	-5	42.6731	Ipconazole	0.001	-3	42.6731	1,4-Diaminobutane	0.109905	-0.958982	87.1711
Piroxicam	13.304	9.484	1.055	level2	D-Ribose 1-phosphate	8.254	0.694	9.203	level2	S-adenosyl-L-homocysteine	7.92113	1.36681	8.75365	level1			D-RIBOSE	6.142		7.875			14.016	2.9303	18.137	5.0167							Ofurace	1e-05	-5	42.8341	Irbesartan	0.001	-3	42.8341	FFA 19:0	0.111858	-0.951334	87.5
Laurylsulfuric acid	17.64	15.111	1.063	level2	N-Acetyl-D-galactosamine-6-phosphate	8.462	0.699	9.359	level2	Pro-leu	4.7248	4.30283	6.98516	level1			ARABINOSE	4.522					4.24835	2.9477	16.922	5.042							Perphenazine	1e-05	-5	42.9952	Legurame	0.001	-3	42.9952	Asp-Phe	0.111973	-0.950887	87.8289
12-HEPE	16.739	14.709	1.077	level2	O-Phosphorylethanolamine	8.33	0.711	9.216	level2	3-Hydroxyglutaric Acid	4.23226	0.705235		level1			Tris(hydroxymethyl)aminomethane	7.468		7.886			7.669	2.9598	3.737	5.053							Prazosin hydrochloride	1e-05	-5	43.1562	Leucomalachite green	0.001	-3	43.1562	Uracil	0.112027	-0.950676	88.1579
FA 20:5;O	17.252	14.951	1.077	level2	Glu-Gly	8.441	0.711	9.335	level2	Daidzein	12.9187	8.72397		level1			Allopurinol riboside	4.36199		6.274			15.757	2.9811	19.127	5.0793							Prochloraz-desimidazole-amino	1e-05	-5	43.3172	Loratadine	0.001	-3	43.3172	Glycocholic acid	0.12475	-0.903958	88.4868
8-HETE	17.391	15.178	1.077	level2	URIDINE 5'-DIPHOSPHO-N-ACETYLGLUCOSAMINE	8.832	0.716	9.769	level2	N-Isovaleroylglycine		3.6641		level1			N-Fructosyl tyrosine	7.31	1.195	8.223			14.379	3.0209	18.17	5.1043							Propanil	1e-05	-5	43.4783	Mapenterol Hydrochloride	0.001	-3	43.4783	Taurocholic acid	0.12475	-0.903958	88.8158
FA 20:4;O	17.956	15.593	1.077	level2	LACTIC ACID	3.785	0.758		level2	Homocystine	8.66393		9.49106	level1			Glu-Arg	8.774		9.658			13.474	3.0209	20.694	5.1455							Pyrisoxazole	1e-05	-5	43.6393	Medroxyprogesterone acetate	0.001	-3	43.6393	L-tyrosine	0.135534	-0.867951	89.1447
5S-Hydroxy-6E,8Z,11Z,14Z-eicosatetraenoic acid	17.956	15.593	1.077	level2	Benzylacetate	7.873	0.763	8.744	level2	Asp-Leu	7.40881	1.60964	8.16223	level1			Ketoleucine		3.513	2.707			14.022	3.0209	20.113	5.1516							Sebuthylazine	1e-05	-5	43.8003	Megestrol acetate	0.001	-3	43.8003	N-Acetylglycine	0.146011	-0.835614	89.4737
FA 18:3	18.629	17.857	1.077	level2	Cytidine 5'-diphosphocholine	8.811	0.774	9.707	level2	Vanillin-4-sulfate		6.011	0.968	level2			Vanillin-4-sulfate		5.967				4.134	3.0769	16.163	5.1625							SudanI	1e-05	-5	43.9614	Metconazole	0.001	-3	43.9614	3,4-Dihydroxy-D-phenylalanine	0.147507	-0.831189	89.8026
Pinolenic acid	20.561	17.857	1.077	level2	Ser-Glu	8.434	0.776	9.223	level2	PFSM-carboxylic_acid; C5H6F5NO4S	13.691	10.932	0.975	level2			N-Fructosyl isoleucine	6.659		7.834			4.984	3.0943	19.778	5.1766							Tebuconazole	1e-05	-5	44.1224	Metformin	0.001	-3	44.1224	PC(14:0/14:0)	0.169375	-0.771151	90.1316
8-(3-Octyl-2-oxiranyl)octanoic acid	17.515	18.259	1.091	level2	Glu-Ser	8.591	0.776	9.5	level2	Diethyl-phthalate	17.072	10.962	0.981	level2			Ethylenediaminetetraacetic acid	8.836		9.923			12.822	3.1073	17.391	5.1875							Tetraconazole	1e-05	-5	44.2834	Methyltestosterone	0.001	-3	44.2834	Hypotaurine	0.174432	-0.758375	90.4605
6-[(E)-2,8-Dihydroxy-5,7-dimethylnon-5-enyl]-4-hydroxy-3-methylpyran-2-one	14.913		1.091	level2	Ergothioneine; LC-tDDA; CE10	6.792	0.782	7.746	level2	Tri(butoxyethyl) phosphate	17.609	15.064	0.982	level2			N-Fructosyl phenylalanine	6.41711	2.784				6.747	3.1133	17.956	5.1875							Thiazafluron	1e-05	-5	44.4444	Metobromuron	0.001	-3	44.4444	PE(16:0/18:1)	0.179383	-0.746219	90.7895
FA 18:1;O	19.127	15.339	1.093	level2	N,N-Dimethylarginine	8.085	0.782	8.919	level2	Oleoyl ethylamide	20.586	17.842	1.008	level2			1,3,7-Trimethyluric acid; LC-tDDA; CE10	4.333					4.89	3.1159	17.956	5.1875							Thiazopyr	1e-05	-5	44.6055	Metolcarb	0.001	-3	44.6055	2-Hydroxyisobutyric Acid	0.182083	-0.739731	91.1184
FA 18:1;O3	14.379		1.098	level2	Cysteine	6.597	0.782		level2	Phencyclidine	14.534	11.556	1.01	level2			S-Methyl-methionine; LC-tDDA; CE10	8.44		9.267			12.77	3.1539	17.557	5.1875							Tolfenpyrad	1e-05	-5	44.7665	Metrafenone	0.001	-3	44.7665	Biotin	0.19515	-0.709632	91.4474
Sulfamethoxazole	12.1533	5.557	1.112	level2	D-Fructose	5.683	0.784	7.824	level2	Laurylsulfuric acid	17.488	14.979	1.06	level2			(2E)-2-(Propan-2-yl)but-2-enedioic acid			1.348			20.539	3.1828	20.08	5.2191							Triflumuron	1e-05	-5	44.9275	Metsulfuron-methyl	0.001	-3	44.9275	1,7-Dimethyluric Acid	0.19606	-0.707612	91.7763
FA 22:3;O2	16.163	14.396	1.118	level2	Galactose	9.674	0.784	8.852	level2	Oroxylin A	12.98	9.101	1.09	level2			Triciribine	4.788					12.086	3.2227	20.207	5.2406							Tripelennamine hydrochloride	1e-05	-5	45.0886	Minoxidil	0.001	-3	45.0886	D-Glucose 6-phosphate	0.207895	-0.682156	92.1053
FA 14:0(2OH)	16.843	14.425	1.118	level2	His-Gly	8.538	0.79	7.9	level2	1,10a-dihydroxy-4,4,7,11b-tetramethyl-1,2,3,4a,5,6,6a,7,11,11a-decahydronaphtho[2,1-f][1]benzofuran-9-one	14.558	12.965	1.1	level2			GLYCERIC ACID	4.8					13.5518	3.236	17.104	5.2844							Tulobuterol	1e-05	-5	45.2496	Myclobutanil	0.001	-3	45.2496	L-Thyroxine	0.233006	-0.632633	92.4342
FA 14:0;O	17.428	14.425	1.118	level2	Volemitol	6.507	0.79	7.9	level2	Piperanine	13.864	8.763	1.112	level2			BETAINE	4.871		7.151			13.7516	3.2511	19.129	5.3033							Vardenafil	1e-05	-5	45.4106	Naproanilide	0.001	-3	45.4106	Inosinic Acid	0.249501	-0.602928	92.7632
Irbesartan	14.708	12.634	1.132	level2	2,4-DIHYDROXYBUTANOIC ACID	6.096	0.797	7.567	level2	6-Methylsulfinylhexanenitrile		3.285	1.129	level2			3-Hydroxybutyrylcarnitine	4.69685		7.518			16.006	3.4623	19.872	5.3033							2,2'-Dihydroxy-4,4'-dimethoxybenzophenone	1e-05	-5	45.5717	Neburon	0.001	-3	45.5717	Glucosamine	0.249501	-0.602928	93.0921
1-Docosahexaenoyl-2-stearoyl-sn-glycero-3-phosphocholine	23.193	19.68	1.139	level2	myo-Inositol	7.738	0.797	8.86	level2	Rosuvastatin	13.878	11.091	1.129	level2			SN-GLYCERO-3-PHOSPHOCHOLINE	7.756		8.572			8.738	3.4694	19.129	5.3033							2-Aminoflubendazole	1e-05	-5	45.7327	Norethindrone	0.001	-3	45.7327	Inositol	0.359408	-0.444412	93.4211
2,4-Thiazolidinedione, 5-[[4-[2-[5-(1-hydroxyethyl)-2-pyridinyl]ethoxy]phenyl]methyl]-	12.623	7.825	1.161	level2	Glutathione (oxidized)	9.036	0.798	10.002	level2	Piperlongumine	13.554	10.421	1.132	level2			Glu-Ser	8.885		9.303			8.597	3.5333	19.495	5.3033							Arformoterol Tartrate	1e-05	-5	45.8937	Norflurazon	0.001	-3	45.8937	4-Hydroxyphenylacetic acid	0.364914	-0.43781	93.75
Dehydroisoandrosterone sulfate	13.872	11.682	1.161	level2	3-Hydroxybutyric acid		0.818	1.912	level2	8-Methoxyloxapine	12.771	8.724	1.136	level2			Piperazine-2-carboxylic acid	8.881					13.381	3.5918	20.087	5.3116							Boscalid	1e-05	-5	46.0548	Ofurace	0.001	-3	46.0548	PC(18:0/18:2)	0.392797	-0.405832	94.0789
INDOXYL SULFATE	6.33	3.971	1.17	level2	3-(.beta.-D-Glucopyranosyloxy)-2-methylbutanenitrile		0.822	8.258	level2	Acenocoumarol	12.793	8.781	1.136	level2			2,6-Dihydroxybenzoic acid		4.658				7.634	3.6629	17.515	5.3197							Brodifacoum	1e-05	-5	46.2158	Oxilinic acid	0.001	-3	46.2158	lactose	0.5	-0.30103	94.4079
Acetyl-sulfamethoxazole	11.686	6.861	1.235	level2	.gamma.-Glu-Cys	8.169	0.822	9.065	level2	rac-4-Sulfoxypropranolol	12.634	9.414	1.137	level2			Asn-Ser	8.5					16.972	3.6833	18.82	5.3283							Brombuterol	1e-05	-5	46.3768	Paraoxon	0.001	-3	46.3768	aminomalonic acid	0.5	-0.30103	94.7368
N,N-Dimethylaniline	5.459		1.247	level2	Glucaric acid	8.476	0.839	9.451	level2	Raspberry ketone sulfate	12.609	8.351	1.142	level2			2-Amino-N-(2-oxo-2,3-dihydro-1H-benzimidazol-5-yl)acetamide			2.287			3.72727	3.7009	19.313	5.3283							Bromuconazole	1e-05	-5	46.5378	Perphenazine	0.001	-3	46.5378	N-acetyl cysteine	0.5	-0.30103	95.0658
FA 19:2;O2	16.688	12.79	1.272	level2	ALPHA-HYDROXYGLUTARIC ACID	4.661	0.839		level2	Dehydroisoandrosterone sulfate	13.818	11.615	1.153	level2			N-Methyl-L-serine	3.72		2.956			7.249	3.7126	20.223	5.3525							Cetirizine hydrochloride	1e-05	-5	46.6989	Prazosin hydrochloride	0.001	-3	46.6989	isoferulic acid	0.5	-0.30103	95.3947
FA 20:2;O2	15.525	13.331	1.272	level2	Ala-Lys	8.761	0.859	9.616	level2	2-Oxindole; LC-tDDA; CE10	4.63	3.531	1.156	level2			Arg-Pro	8.529		9.4			7.898	3.7232	21.471	5.3695							Chlorbenzuron	1e-05	-5	46.8599	Prochloraz-desimidazole-amino	0.001	-3	46.8599	GMP	0.5	-0.30103	95.7237
(R)-2-hydroxystearic acid	19.129	16.621	1.277	level2	RAFFINOSE	8.545	0.864	9.517	level2	5-Methyl-1-(2-methylpropyl)pyrimidine-2,4(1H,3H)-dione	3.797		1.229	level2			2'-O-Methyladenosine	7.904					14.203	3.7266	19.946	5.3852							Chlorfenvinphos	1e-05	-5	47.0209	Progesterone	0.001	-3	47.0209	p-cresyl sulfate	0.5	-0.30103	96.0526
3-Hydroxyoctadecanoic acid	19.872	16.621	1.277	level2	Erlose	8.57	0.864		level2	N-Cyclohexyl-N'-[3-(4-morpholinyl)propyl]urea	13.81	10.906	1.24	level2			2'-Deoxyuridine 5'-monophosphate	3.705					8.158	3.7351	20.594	5.4067							Chlorimuron-ethyl	1e-05	-5	47.182	Propanil	0.001	-3	47.182	adipic acid	0.5	-0.30103	96.3816
FA 16:0(2OH)	17.9	15.471	1.288	level2	Maltotriose	8.57	0.864		level2	Nonioside N	13.351	11.038	1.266	level2			Phenol sulfate		3.583				3.805	3.7415	17.9	5.4115							Chlorthiophos	1e-05	-5	47.343	Propiconazole	0.001	-3	47.343	saccharopine	0.5	-0.30103	96.7105
1,10a-dihydroxy-4,4,7,11b-tetramethyl-1,2,3,4a,5,6,6a,7,11,11a-decahydronaphtho[2,1-f][1]benzofuran-9-one	14.042	13.114	1.293	level2	2-Hydroxy-2-(2-methoxy-2-oxoethyl)butanedioic acid	4.027	0.866	2.699	level2	5-(4-methyl-5-oxo-2H-furan-3-yl)pentanoic acid	12.919	8.313	1.291	level2			N1-(2,4-Dinitrophenyl)ethane-1,2-diamine		3.444				16.091	3.7581	20.14	5.4431							Clenbuterol	1e-05	-5	47.504	Proquinazid	0.001	-3	47.504	indole-3-acetamide	0.5	-0.30103	97.0395
2-[4-(4-Chlorobenzoyl)phenoxy]-2-methylpropanoic acid	14.397	13.154	1.3	level2	Ethylenediaminetetraacetic acid	8.658	0.868	9.24	level2	6,10a-dihydroxy-4-(hydroxymethyl)-4,7,11b-trimethyl-1,2,3,4a,5,6,6a,7,11,11a-decahydronaphtho[2,1-f][1]benzofuran-9-one	12.899		1.335	level2			2-Methoxyphenol sulfate		4.965				16.017	3.7679	19.777	5.4607							Cyanofenphos	1e-05	-5	47.6651	Pyrimorph	0.001	-3	47.6651	Biliverdin	0.581887	-0.235161	97.3684
FA 14:1;O2			1.302	level2	Maltotetraose	8.862	0.868		level2	Indoxyl sulfate	11.512	4.011	1.342	level2			Ser-Ala	8.88					14.022	3.7688	20.566	5.4646							Enrofloxacin	1e-05	-5	47.8261	Pyrisoxazole	0.001	-3	47.8261	PC(16:0/20:4)	0.781562	-0.107036	97.6974
9-Hydroxynonanoic acid	12.369	6.978	1.307	level2	STACHYOSE	8.897	0.868		level2	2-[5-(2-hydroxypropyl)oxolan-2-yl]propanoic acid	12.906	6.686	1.362	level2			Moroxydine	3.919					12.765	3.8013	20.056	5.4777							Ethofumesate	1e-05	-5	47.9871	Ractopamine	0.001	-3	47.9871	PC(18:0/18:0)	0.789625	-0.102579	98.0263
PC 34:7	18.45		1.307	level2	NADH	8.613	0.886	9.528	level2	(.+/-.)7-epi-Jasmonic acid			1.362	level2			CITRIC ACID	9.502					19.541	3.8856	19.504	5.4997							Etobenzanid	1e-05	-5	48.1481	Salmeterol	0.001	-3	48.1481	Car C17:0	0.898204	-0.0466252	98.3553
1,4-Cyclohexanedicarboxylic acid			1.307	level2	7-Deaza-dX	9.027	0.988	9.077	level2	(9E)-11a-hydroxy-3,6,10-trimethyl-6,7,8,11-tetrahydro-4H-cyclodeca[b]furan-2,5-dione	12.512	10.634	1.373	level2			Proline-hydroxyproline	7.652		8.618			3.774	3.9655	20.9	5.5019							Famphur	1e-05	-5	48.3092	Sebuthylazine	0.001	-3	48.3092	Homocysteine	1.01074	0.00464118	98.6842
4-hydroxybenzaldehyde			1.307	level2	4-(4-Methyl-1-piperazinyl)butanoic acid	3.911	1.127	5.553	level2	Spiculisporic acid			1.377	level2			1,4-Cyclohexanedicarboxylic acid			1.307			18.608	3.9872	18.292	5.5197							Fenarimol	1e-05	-5	48.4702	Simeconazole	0.001	-3	48.4702	Phenylpyruvic acid	1.31238	0.118059	99.0132
ascr#17	12.558	9.325	1.315	level2	Val-Gly	6.953	1.127	7.946	level2	SEBACATE	10.387	5.362	1.378	level2			Niacinamide		1.268				20.368	4.0286	18.292	5.5197							Fenpiclonil	1e-05	-5	48.6312	Spinetoram	0.001	-3	48.6312	Lactic acid	4.50158	0.653365	99.3421
1,11-Undecanedicarboxylic acid	12.304	8.161	1.316	level2	URACIL	10.375	1.127		level2	3-(1,2-dihydroxypropyl)-1,6,8-trihydroxyanthracene-9,10-dione	11.682	5.505	1.379	level2			.alpha.-Asp-Gly	8.543		9.432			16.537	4.039	18.292	5.5197							Flubendazole	1e-05	-5	48.7923	Spinosyn A	0.001	-3	48.7923	O-Phospho-DL-serine	249.501	2.39707	99.6711
Tafluprost (free acid)	12.473	9.239	1.328	level2	N-Acryloyl-DL-aspartic acid		1.134		level2	3-Sulfopropanoic acid			1.384	level2			3-Acetoxypyridine			5.936			8.56	4.1254	19.994	5.5259							Flumetsulam	1e-05	-5	48.9533	Spinosyn D	0.001	-3	48.9533	Guanosine-5'-triphosphate	249.501	2.39707	100
Valsartan	14.919	10.245	1.329	level2	3-Hydroxybutyrylcarnitine	4.798	1.141	7.546	level2	2-Hydroxyphenylacetic acid	11.65	3.696	1.389	level2			Frequentin			1.393			7.778	4.2361	18.381	5.5385							Gliclazide	1e-05	-5	49.1143	SudanI	0.001	-3	49.1143
Pestalotin	12.832	8.331	1.334	level2	Val-Asp	7.463	1.148	8.726	level2	Sodium 4-hydroxy-benzoate			1.395	level2			D-(+)-Malic acid	4.753					20.066	4.2693	19.55	5.5523							Ketoconazole	1e-05	-5	49.2754	Sulfachinoxalin	0.001	-3	49.2754
Carbaryl			1.334	level2	Ethyl 4-(1-hydroxy-1-methylethyl)-2-propyl-1H-imidazole-5-carboxylate	6.4	1.177	7.335	level2	Pyridoxal hydrochrolide	12.83		1.402	level2			L-Cysteine S-sulfate	6.968		8.003			8.661	4.2842	19.399	5.5762							Malachite green cation	1e-05	-5	49.4364	Tebuconazole	0.001	-3	49.4364
1H-Indazole-1-pentanoic acid, 3-[[[1-(aminocarbonyl)-2,2-dimethylpropyl]amino]carbonyl]-	12.294	8.766	1.343	level2	Ile-Glu	5.053	1.196	7.985	level2	Olivetolcarboxylic acid	10.387		1.405	level2			NEPSILON,NEPSILON,NEPSILON-TRIMETHYLLYSINE	8.319		9.15			15.747	4.2896	3.683	5.6092							Mebendazole	1e-05	-5	49.5974	Testosterone propionate	0.001	-3	49.5974
Undecanedioic acid	11.546	4.74	1.344	level2	Niacinamide	8.755	1.257	1.672	level2	(3S)-3-(2-methylpyrimidin-5-yl)-9-(5,6,7,8-tetrahydro-1,8-naphthyridin-2-yl)nonanoic acid	19.43	8.387	1.407	level2			Theophylline	3.776	5.228	1.46			14.538	4.3319	17.7	5.6105							Metosulam	1e-05	-5	49.7585	Tetraconazole	0.001	-3	49.7585
(2E)-2-(Propan-2-yl)but-2-enedioic acid			1.348	level2	Trifluoromethanesulfonic acid		1.302	0.865	level2	Prostaglandin I3			1.41	level2			[(2S,3R,4S,5S,6R)-3,4,5-trihydroxy-6-(hydroxymethyl)oxan-2-yl] (2E,6E)-8-hydroxy-2,6-dimethylocta-2,6-dienoate	13.357	10.173				7.915	4.3866	18.155	5.6324							Neotame	1e-05	-5	49.9195	Thiazafluron	0.001	-3	49.9195
1H-Indazole-1-pentanoic acid, 3-[[[1-(aminocarbonyl)-2-methylpropyl]amino]carbonyl]-	12.106	7.141	1.357	level2	Allopurinol	3.76984	1.459		level2	4-[2-(6,7-dihydroxy-1,2,4a-trimethylspiro[3,4,6,7,8,8a-hexahydro-2H-naphthalene-5,2'-oxirane]-1-yl)ethyl]-2-hydroxy-2H-furan-5-one			1.417	level2			Tetraethylene glycol	10.4327	3.25				20.769	4.5153	21.23	5.6467							Norfludiazepam	1e-05	-5	50.0805	Thiazopyr	0.001	-3	50.0805
2-(4-Morpholinyl)-1-phenylethanol	3.907		1.373	level2	L-Glutarylcarnitine	4.821	1.472		level2	(2E,4E)-12-hydroxy-13-(hydroxymethyl)-3,5,7-trimethyltetradeca-2,4-dienedioic acid			1.417	level2			N-Methyl-L-threonine	7.409					20.539	4.5286	21.962	5.6514							Oxarbazepine	1e-05	-5	50.2415	Tolfenpyrad	0.001	-3	50.2415
6,10a-dihydroxy-4-(hydroxymethyl)-4,7,11b-trimethyl-1,2,3,4a,5,6,6a,7,11,11a-decahydronaphtho[2,1-f][1]benzofuran-9-one	12.69	9.851	1.379	level2	NAE 4:0	4.728	1.491	6.991	level2	4-(N-Boc-amino)piperidine	4.218	4.454	1.419	level2			Glu-Asp	14.552	11.755				8.794	4.6709	18.629	5.6605							Oxfendazole-Sulfone	1e-05	-5	50.4026	Triasulfuron	0.001	-3	50.4026
FA 20:3;O3			1.379	level2	IS_LEUCINE-5,5,5-D3	4.714	1.729	7.004	level2	17,20,21-Trihydroxypregn-1-ene-3,11-dione	13.048	9.378	1.429	level2			Arg-Lys	15.633	13.377	1.4			16.298	4.6829	20.561	5.6605							Papaverine	1e-05	-5	50.5636	Triflumuron	0.001	-3	50.5636
trans-Traumatic acid			1.379	level2	Lamivudine	3.684	1.76	3.593	level2	7-Keto-3.alpha.,12-.alpha.-dihydroxycholanic acid	14.049	13.068	1.44	level2			DL-Ornithine	8.601		8.816			12.31	4.7765	21.007	5.6605							Penfluridol	1e-05	-5	50.7246	Tripelennamine hydrochloride	0.001	-3	50.7246
FA 13:3+1O			1.379	level2	Pantothenate	10.3853	1.767	3.518	level2	2-Decyl-3-hydroxypentanedioic acid	12.405	8.44	1.443	level2			Glu-Gly	8.443		9.337			20.987	4.8712	18.741	5.6605							Penoxsulam	1e-05	-5	50.8857	Tulobuterol	0.001	-3	50.8857
(Z)-9,12,13-Trihydroxyoctadec-15-enoic acid			1.386	level2	S-Allyl-L-Cysteine	3.884	1.819	4.132	level2	Thromboxane B3	12.807	9.936	1.445	level2			DEOXYCARNITINE	4.681		7.67			20.113	5.1516	18.741	5.6605							Procaterol	1e-05	-5	51.0467	Vardenafil	0.001	-3	51.0467
Frequentin			1.393	level2	Gly-Ile	5.012	1.966	7.77	level2	Ethyl sulfate	11.394	0.77	1.448	level2			NG,NG-Dimethyl-L-arginine	8.038					20.087	5.3116	19.865	5.692							Propyrisulfuron	1e-05	-5	51.2077	Triadimenol	0.001	-3	51.2077
Dihydroaspyrone			1.397	level2	Phe-Gln	7.048	2.344	7.926	level2	ISETHIONIC ACID	11.394	0.77	1.448	level2			Citramalic acid	8.564		8.597			18.381	5.5385	19.4	5.7184							Spirotetramat ketohydroxy	1e-05	-5	51.3688	4,6-Dinitro-O-cresol	0.001	-3	51.3688
Tetraethylene glycol monomethyl ether			1.397	level2	5-(4-Fluorophenyl)-5-methylimidazolidine-2,4-dione		2.37		level2	3-Dehydrocholic acid	14.016	12.041	1.451	level2			ALPHA-HYDROXYGLUTARIC ACID	4.685					3.683	5.6092	19.957	5.7968							Sulfaphenazole	1e-05	-5	51.5298	4-Chloro-5-(p-tolyl)-1H-imidazole-2-carbonitrile	0.001	-3	51.5298
2,5-dihydroxybenzenesulfonate		3.031	1.399	level2	Val-Glu	7.478	2.417	8.295	level2	5.alpha.-Pregnan-3.alpha.,17-diol-20-one 3-sulfate			1.456	level2			Methylenediphosphonic acid	9.133		10.106			21.007	5.6605	16.648	5.8							Sulfapyrazole	1e-05	-5	51.6908	Butylparaben	0.001	-3	51.6908
CMPF	11.906	5.553	1.4	level2	Glu-Val	7.478	2.417	8.419	level2	4-Formylaminoantipyrine			1.467	level2			His-Gly	8.521		9.443			19.957	5.7968	19.475	5.8002							Tebupirimfos	1e-05	-5	51.8519	Chloro-3-oxa-perfluorononanesulfonic acid	0.001	-3	51.8519
4-Pregnen-17.alpha., 20.beta.-diol-3-one-20-sulfate	13.178	10.975	1.4	level2	Phe-Thr	5.005	2.419	7.633	level2	5?-CHOLANIC ACID-3?-OL-6_7-DIONE	15.063	12.509	1.472	level2			ASPARAGINE	7.771		8.684			21.471	5.8175	21.471	5.8175							Terfenadine	1e-05	-5	52.0129	Diflunisal	0.001	-3	52.0129
5.beta.-Androstan-3.alpha.-ol-17-one sulfate	14.715	12.028	1.4	level2	Adenosine 2'-monophosphate	7.747	2.445	8.628	level2	Cortisol 21-sulfate	12.976	10.331	1.478	level2			4-hydroxybenzaldehyde			1.307			21.962	6.2076	20.5967	5.8332							Tetrachlorvinphos	1e-05	-5	52.1739	Diphenyl phosphate	0.001	-3	52.1739
Arg-Lys	15.633	13.377	1.4	level2	Val-Thr	7.013	2.456	8.039	level2	Pentamethylene bisacetamide	4.434		1.505	level2			Ureidoglutaric acid	8.508		9.406			19.719	6.2746	21.5934	5.8413							Trimethoprim	1e-05	-5	52.3349	Fenoxanil	0.001	-3	52.3349
FA 16:1;O3	14.022		1.4	level2	Atrazine-desethyl		2.458		level2	(2E)-2-(Propan-2-yl)but-2-enedioic acid	3.68		1.532	level2			Isobutyryl-carnitine; LC-tDDA; CE10	4.01	3.15				20.062	6.4109	19.949	5.8569							Fluazuron	1e-05	-5	52.496	Fipronil Desulfinyl	0.001	-3	52.496
(E)-3,10-Dihydroxy-4,9-dimethyldodec-6-enedioic acid	12.273		1.4	level2	COENZYME A	8.644	2.517	9.54	level2	3-HYDROXYPHENYLACETIC ACID	11.65		1.537	level2			5-Hydroxyvalproic acid		4.417				9.063	6.4548	20.715	5.8575							Foramsulfuron	1e-05	-5	52.657	Fipronil sulfone	0.001	-3	52.657
Cotinine			1.427	level2	2-Piperidone		2.535	1.452	level2	(+)-Camphanic acid	10.829	1.585	1.558	level2			LACTIC ACID	3.79					20.988	6.5291	17.129	5.8787							Noscapine	1e-05	-5	52.818	Flunixin	0.001	-3	52.818
PC 34:2	23.046		1.442	level2	Tyr-Gly	7.192	2.615	8.031	level2	4,8-Dihydroxy-3,7,8-trimethyl-5,7-dihydropyrano[4,3-b]pyran-2-one	10.387	2.123	1.6	level2			Arg-Tyr-Arg	16.873	14.29				19.901	6.6674	19.604	5.8845							Validamycin	1e-05	-5	52.9791	Fluometuron	0.001	-3	52.9791
PC O-38:6|PC O-19:2_19:4			1.449	level2	Midafotel	3.691	2.723	3.898	level2	4-Pregnen-11,17,20,21-tetrol-3-one	13.232	10.099	1.64	level2			His-Glu	8.614		9.484			22.05	7.2158	16.376	5.8892							Fludioxonil	1e-05	-5	53.1401	Flurtamone	0.001	-3	53.1401
PC 33:1	23.215	19.537	1.45	level2	3-Methylglutarylcarnitine	4.738	2.918	5.591	level2	THE	13.232	10.308	1.64	level2			Glu-His	8.614		9.661			20.894	7.2243	20.586	5.9004							Perfluorononanoic acid	1e-05	-5	53.3011	Flusulfamide	0.001	-3	53.3011
1-Stearoyl-2-myristoyl-sn-glycero-3-phosphocholine			1.456	level2	4-Bromo-2,6-di-tert-butylphenol	4.338	3.046	6.155	level2	2-Acetamidooctanoic acid	13.624	10.129	1.726	level2			(3-Aminopropyl)(hydroxymethyl)phosphinic acid	4.89		7.199			18.45	7.6	19.819	5.9126							4,6-Dinitro-O-cresol	1e-05	-5	53.4622	Fluxapyroxad	0.001	-3	53.4622
Theophylline	3.776	5.228	1.46	level2	Methyl 3-(4-hydroxyphenyl)-2-[(4-hydroxyphenyl)methyl]-4-methoxy-5-oxofuran-2-carboxylate	8.02	3.108	8.901	level2	Lumichrome	13.064	9.941	1.74	level2			3-Aminopiperidine-2,6-dione	8.379		7.878			22.206	8.3887	20.323	5.916							Fluometuron	1e-05	-5	53.6232	Forchlorfenuron	0.001	-3	53.6232
3-Oxo-1,8-octanedicarboxylic acid	10.34		1.615	level2	3'-Dephosphocoenzyme A	7.975	3.124	8.796	level2	SUBERIC ACID	3.69		1.758	level2			4-Morpholinopropanesulfonic acid	4.64					22.717	8.8062	20.13	5.9424							Flurtamone	1e-05	-5	53.7842	Isobutyl 4-hydroxybenzoate	0.001	-3	53.7842
SUBERIC ACID		0.804	1.64	level2	Gln-Leu	6.66	3.133		level2	MALEIC ACID	4.7		1.768	level2			.gamma.-L-Glutamyl-L-alanine	8.143		9.049			22.123	8.9983	19.805	5.9912							Flusulfamide	1e-05	-5	53.9452	Isopyrazam	0.001	-3	53.9452
Tolcapone	12.946	19.875	1.663	level2	Phe-Ala	4.778	3.228	7.294	level2	etheno-dA	8.603	7.064	1.783	level2			Monocrotaline N-oxide	7.242	2.977	8.051			23.94	9.06	18.693	5.9927							Perfluoroheptanoic acid	1e-05	-5	54.1063	Isoxaflutole	0.001	-3	54.1063
Gabapentin Related Compound E	12.77	5.405	1.677	level2	Ala-Phe	4.778	3.228	7.471	level2	4-[5-(7-Hydroxy-5,5,8a-trimethyl-2-methylidene-3,4,4a,6,7,8-hexahydro-1H-naphthalen-1-yl)-3-methylpentoxy]-4-oxobutanoic acid	15.592	9.02	1.784	level2			Cotinine			1.427			21.954	9.1644	19.253	6.0208							Sulfanitran	1e-05	-5	54.2673	Monalide	0.001	-3	54.2673
cis-10,11-Dihydroxy-10,11-dihydrocarbamazepine	12.67		1.678	level2	Methopterine		3.508		level2	Decanoic acid, 3,5-dihydroxy-	12.392	6.239	1.81	level2			Val-Arg	8.259		9.16			22.69	9.1689	19.713	6.0242							Sulfoxaflor	1e-05	-5	54.4283	Nicarbazin	0.001	-3	54.4283
Ethanone, 1-[5-ethyl-2-hydroxy-4-[[6-methyl-6-(2H-tetrazol-5-yl)heptyl]oxy]phenyl]-	13.388	8.027	1.689	level2	Phenol sulfate		3.631		level2	2-Aminonicotinic acid	15.8582		1.81	level2			Benzoic acid		2.305				21.819	9.3305	22.441	6.0517							Tebufenozide	1e-05	-5	54.5894	Nitrendipine	0.001	-3	54.5894
Pimelic acid	4.746	5.117	1.86	level2	(6S)-5-Methyltetrahydrofolic acid		3.648		level2	DL-2-Hydroxyvaleric acid sodium salt hydrate		1.087	1.831	level2			4-Isoxazolepropanoic acid, .alpha.-amino-2,3-dihydro-5-methyl-3-oxo-	4.891					3.767	9.5545	20.992	6.066							1H,1H,2H,2H-Perfluorohexanesulfonic acid	1e-05	-5	54.7504	Perfluoroheptanoic acid	0.001	-3	54.7504
Phthalic acid	24.15		1.888	level2	Glu-Ile-Arg	6.7553	3.824		level2	1,3-Cyclohexanedicarboxylic acid	3.7		1.847	level2			PYRUVIC ACID	4		5.342			22.8598	9.8316	21.2034	6.1078							Benzovindiflupyr	1e-05	-5	54.9114	perfluoro-n-pentanoic acid-1 (PFPeA)	0.001	-3	54.9114
trans-3'-Hydroxycotinine			1.898	level2	Leu-His	7.895	3.87	8.807	level2	2-(Formylamino)benzoic acid	3.702	3.912	1.852	level2			Glufosinate	4.821					23.061	10.6621	19.799	6.1085							Bisphenol AF	1e-05	-5	55.0725	Perfluorooctanesulfonate (PFOS)	0.001	-3	55.0725
N-(2-Hydroxy-3-methylbutanoyl)leucine	10.4		1.906	level2	Phe-Asn		4.21		level2	1,3,7-Trimethyluric acid	6.754	3.92	1.98	level2			His-Ala	8.336		9.249			23.04	10.8428	19.799	6.1085							Chromafenozide	1e-05	-5	55.2335	Perfluorooctanoic acid	0.001	-3	55.2335
DL-2-Hydroxyvaleric acid sodium salt hydrate		1.199	1.931	level2	His-Leu	7.276	4.238	8.15	level2	Hydroxydehydronifedipinecarboxylic acid			1.98	level2			.gamma.-Glu-.epsilon.-Lys	8.762		9.677			23.907	10.8612	20.829	6.14							Clodinafop	1e-05	-5	55.3945	PFHxA	0.001	-3	55.3945
Hydroxydehydronifedipinecarboxylic acid	12.314	6.436	1.942	level2	Intermedine N-oxide	4.569	4.265	7.258	level2	1,4-Cyclohexanedicarboxylic acid	3.7		1.983	level2			N,N'-(Ethylenedioxy)diphthalimide		6.067				22.934	10.9943	20.269	6.1654							Diflufenican	1e-05	-5	55.5556	Sulfanitran	0.001	-3	55.5556
Homovanillic acid sulfate	4.41		1.948	level2	Phe-Ser	6.845	4.315	7.784	level2	[3-(Acetylamino)phenoxy]acetic acid	3.799		1.987	level2			Glu-Lys	8.762		9.694			23.098	11.0089	20.323	6.18							Diuron	1e-05	-5	55.7166	Sulfoxaflor	0.001	-3	55.7166
(+)-Diethyl L-tartrate			1.95	level2	Tyr-Lys	3.859	4.546	6.001	level2	3-(3-Hydroxyphenyl)propionic acid sulfate		1.353	1.996	level2			N5-(1-Iminoethyl)-L-ornithine	4.25		6.098			23.368	11.0197	21.962	6.2076							Lufenuron	1e-05	-5	55.8776	Tebufenozide	0.001	-3	55.8776
(3-Amino-6-phenylthieno[2,3-b]pyridin-2-yl)(phenyl)methanone	12.31		2.067	level2	(4R)-3-methylidene-4-[(E)-3-methyl-4-(4-methyl-5-oxooxolan-2-yl)but-2-enyl]oxolan-2-one	3.923	4.555	6.009	level2	4-Pregnen-6.beta.,11.beta.,17,21-tetrol-3,20-dione	12.894	5.455	2.071	level2			9-Methylxanthine; LC-tDDA; CE10	7.011		2.84			23.631	11.1149	14.201	6.2118							Metaflumizone	1e-05	-5	56.0386	Blasticidine S	0.005	-2.30103	56.0386
Zeranol	12.456	8.671	2.127	level2	Glutamylphenylalanine (isomer of 1503)	7.387	4.593	8.115	level2	Glucaric acid	8.497	0.684	2.072	level2			N.epsilon.-Methyl-L-lysine	8.365					22.356	11.1777	19.245	6.2167							Perfluorodecanoic acid	1e-05	-5	56.1997	Benzophenone	0.005	-2.30103	56.1997
5.alpha.-Pregnan-3.alpha.,17-diol-20-one 3-sulfate	13.866	12.009	2.268	level2	Glu-Phe	7.387	4.593	8.115	level2	4-Amino-5-(4-fluorophenyl)-2,4-dihydro-3H-1,2,4-triazole-3-thione	9.483		2.072	level2			3-Ureidoisobutyric acid [M+H-H2O]+; AIF; CE0; CorrDec	8.913		7.878			23.637	11.2231	19.245	6.2167							Perfluorododecanoic acid	1e-05	-5	56.3607	Carboxin	0.005	-2.30103	56.3607
2-Amino-N-(2-oxo-2,3-dihydro-1H-benzimidazol-5-yl)acetamide			2.287	level2	Phe-Gly-Gly	6.948	4.64	7.857	level2	tras-4-Hydroxycinnamic acid sulfate			2.169	level2			4-Acetamidophenol sulfate		3.185				20.073	11.3389	19.719	6.2746							Perfluoroundecanoic acid	1e-05	-5	56.5217	Diphenylamine	0.005	-2.30103	56.5217
2-Hydroxybenzoic acid sulfate			2.316	level2	N-(3-Methoxyphenyl)-4-piperidinamine	12.042	4.896	4.035	level2	NCGC00381248-01!4-oxododecanedioic acid	12.964	3.53	2.251	level2			2-Methyl-4-nitroaniline		1.44				22.657	11.3844	14.815	6.2823							Repaglinide	1e-05	-5	56.6828	2,2'-Dihydroxy-4,4'-dimethoxybenzophenone	0.005	-2.30103	56.6828
2-HYDROXYBUTYRIC ACID	10.33	0.818	2.555	level2	Norlidocaine	12.042	4.896	4.035	level2	4-AMINOBUTANOATE	3.763		2.254	level2			Pantothenic acid	10.36	1.748				23.511	11.399	20.566	6.3049							Sedaxane	1e-05	-5	56.8438	2-Aminoflubendazole	0.005	-2.30103	56.8438
PC 40:4	20.06	20.117	2.565	level2	3-[5-(2-Methylpropyl)-3,6-dioxopiperazin-2-yl]propanoic acid	3.827	5.128	5.786	level2	Methyl morpholine-3-carboxylate			2.254	level2			SUBERIC ACID			1.64			21.969	11.4017	20.8403	6.3051							Thidiazuron	1e-05	-5	57.0048	3-O-methyl-Colterol	0.005	-2.30103	57.0048
Hydroxysebacic acid	11.883	0.856	2.695	level2	Sulfanitran	3.776	5.196	5.527	level2	4-ACETAMIDOBUTANOIC ACID	3.68	0.863	2.258	level2			4-AMINOBUTANOIC ACID	7.9		8.768			23.046	11.4174	20.65	6.3207							Thifluzamide	1e-05	-5	57.1659	4,4'-Methylenebis(2-chloroaniline)	0.005	-2.30103	57.1659
Ketoleucine		3.513	2.707	level2	DescladinoseAzithromycin		5.5	6.272	level2	2-Aminoadenosine	12.338	6.519	2.327	level2			2-HYDROXYBUTYRIC ACID	10.33		2.555			21.072	11.4929	17.2	6.3725							Tolbutamide	1e-05	-5	57.3269	4,4'-Thiodianiline	0.005	-2.30103	57.3269
5-Methoxysalicylic acid sulfate			2.708	level2	Lidocaine	12.17	5.591	2.126	level2	Methoxyphenamine	12.27	6.147	2.365	level2			3-Amino-1,1,1-trifluoro-2-propanol	6.286		7.809			22.833	11.4929	20.68	6.3894							6-Benzylaminopurine	1e-05	-5	57.4879	4-Benzoylbiphenyl	0.005	-2.30103	57.4879
Phytosphingosine 1-phosphate	13.5518		2.758	level2	Cefuroxime	3.782	5.754	5.555	level2	3-METHYLGLUTACONIC ACID	3.7		2.368	level2			(E)-2-Phenylethenesulfonic acid		5.274				23.8183	11.6087	19.497	6.4005							Flubendazole	1e-05	-5	57.649	Amidosulfuron	0.005	-2.30103	57.649
6,8-Dimethyl-4-hydroxycoumarin	3.72885		2.783	level2	Diethyl L-glutamate	12.56	6.806		level2	2,4-Dimethoxybenzoic acid	10.39		2.384	level2			Glu-Gln	8.585		9.458			23.288	11.6087	20.062	6.4109							Glibornuride	1e-05	-5	57.81	Arformoterol Tartrate	0.005	-2.30103	57.81
Clopidogrel carboxylic acid	12.527	7.402	2.836	level2	DL-Laudanosine	12	6.889		level2	O-HYDROXYHIPPURIC ACID	11.569	4.31	2.416	level2			gamma-Glutamylglutamine	8.589		9.458			23.7691	11.6711	20.615	6.4212							Glyburide	1e-05	-5	57.971	Arsanilic acid	0.005	-2.30103	57.971
9-Methylxanthine; LC-tDDA; CE10	7.011		2.84	level2	Echimidine N-oxide	12.338	7.032		level2	DEXCHLORPHENIRAMINE	12.781	8.543	2.421	level2			Ecgonine	4.759		7.104			21.4395	11.729	19.633	6.4407							Halosulfuron-methyl	1e-05	-5	58.132	Atenolol	0.005	-2.30103	58.132
ST 24:1;O4;S	13.525	11.515	2.849	level2	Nalidixic acid	12.286	7.172		level2	Heptadecasphinganine	16.778	13.939	2.436	level2			Succinis acid	3.492		4.314			21.511	11.729	19.4455	6.4407							Triasulfuron	1e-05	-5	58.2931	Benzofenap	0.005	-2.30103	58.2931
CAR 18:2	18.652	16.057	2.858	level2	1H-Indole-3-ethanamine, 6-methoxy-N,N-bis(1-methylethyl)-	12.55	7.37	2.076	level2	Ethylmalonic acid	10.35	0.703	2.462	level2			Ethyl (4-amino-1-piperidinyl)acetate	12.769					23.4511	11.7496	9.063	6.4548							Triflusulfuron	1e-05	-5	58.4541	Boscalid	0.005	-2.30103	58.4541
4-(1-Amino-2-carboxyethyl)benzoic acid	11.68	4.762	2.878	level2	Ropivacaine	12.55	7.37	2.076	level2	Val-Glu			2.539	level2			Pro-Thr-Lys	4.85571	5.837				23.051	11.8324	20.32	6.4986							Isocarbophos	1e-05	-5	58.6151	Brodifacoum	0.005	-2.30103	58.6151
Morphine	12.264	6.44	2.927	level2	MMV688469	3.771	7.518	5.428	level2	Triciribine	4.771	4.865	2.669	level2			(sec-Butylamino)(oxo)acetic acid	6.087					23.109	11.8578	20.988	6.5291							Diethyltoluamide	5e-05	-4.30103	58.7762	Brombuterol	0.005	-2.30103	58.7762
N-Methyl-L-serine	3.72		2.956	level2	Ambroxol		7.966		level2	N-Acryloyl-DL-aspartic acid		1.122	2.677	level2			Ergothioneine; LC-tDDA; CE10	6.839					21.871	11.8654	21.08	6.5301							Betaxolol	5e-05	-4.30103	58.9372	Bromperidol	0.005	-2.30103	58.9372
GLUTARIC ACID		0.654	2.987	level2	Labetalol	12.55	8.129	4.906	level2	Ketoleucine			2.677	level2			4-Formylaminoantipyrine		3.372				20.127	11.8951	19.1993	6.5489							Cyromazine	5e-05	-4.30103	59.0982	Bromuconazole	0.005	-2.30103	59.0982
Arachidonoyl-1-thioglycerol	14.351	11.728	3.13	level2	N-(3-Acetylphenyl)-N'-(1-methyl-1H-pyrazol-3-yl)thiourea	12.4736	8.141	1.02	level2	3-(1-Hydroxy-3-methylbutyl)-6-[2-hydroxy-4-methyl-6-[(E)-3-oxobut-1-enyl]phenoxy]-2-methoxybenzoic acid	14.105	12.041	2.685	level2			Phenylalanine betaine	3.907		5.362			21.5079	11.9157	21.012	6.5677							Diniconazole	5e-05	-4.30103	59.2593	Butyl methoxydibenzoylmethane	0.005	-2.30103	59.2593
alpha,beta-Dihydroresveratrol			3.159	level2	3-Cyclohexyl-1,1-dimethylurea	12.838	8.171	1.101	level2	N.delta.-Benzyloxycarbonyl-D-ornithine	12.02		2.687	level2			L-Valine	5.981		7.803			22.462	11.9406	20.16	6.6647							Etrimfos	5e-05	-4.30103	59.4203	Cetirizine hydrochloride	0.005	-2.30103	59.4203
Arachidonoyl-carnitine; LC-tDDA; CE20	18.648	16.046	3.26	level2	Lumichrome	12.908	8.256		level2	SCDCA - Sulfochenodeoxycholic acid	12.652		2.689	level2			3-Hydroxy-2-methyl-4-pyrone sulfate	4.72	2.372				22.462	11.9406	19.901	6.6674							Fenoxanil	5e-05	-4.30103	59.5813	Chlorantraniliprole	0.005	-2.30103	59.5813
CAR 20:4	18.648	16.046	3.26	level2	Octenoyl-carnitine; LC-tDDA; CE10	3.691	8.328	4.464	level2	5-Oxo-1-propyl-2-pyrrolidineacetic acid	12.039	5.538	2.697	level2			N-epsilon-Formyl-L-lysine	7.371		8.213			23.7002	11.9409	21.01	6.7226							Fluometuron	5e-05	-4.30103	59.7424	Chlorbenzuron	0.005	-2.30103	59.7424
1-Pyrrolidineheptanoic acid, 2-(3-hydroxyoctyl)-5-oxo-	15.71	13.594	3.331	level2	Leu-Enkephalin		8.446	6.406	level2	Ecgonine	4.273	6.223	2.697	level2			Tripropylene glycol	12.071					23.74	11.9409	19.4556	6.7339							Gestrinone	5e-05	-4.30103	59.9034	Chlorbromuron	0.005	-2.30103	59.9034
CAR 18:3	18.111	15.529	3.462	level2	Citalopram	12.838	9.11	1.143	level2	5-Chloro-7-nitroquinolin-8-ol	3.7		2.698	level2			Pyroglutamic acid (not validated, isomer of 89)	7.656	1.057	8.542			23.135	12.0899	17.121	6.7402							Isoproturon	5e-05	-4.30103	60.0644	Chlorfenvinphos	0.005	-2.30103	60.0644
CAR 16:1	18.298	15.74	3.464	level2	Desmethylcitalopram	12.874	9.184	2.943	level2	3-Hydroxy-6-methylheptyl 2-O-.beta.-D-glucopyranosyl-.beta.-D-glucopyranoside	12.584	9.95	2.701	level2			4-Hydroxyhippuric acid	3.84	1.912				23.678	12.1478	19.497	6.7729							Isouron	5e-05	-4.30103	60.2254	Chlorimuron-ethyl	0.005	-2.30103	60.2254
CAR 13:0	17.067	14.557	3.57	level2	Ile-Phe	4.259	9.222	6.26	level2	Diclofop	12.481	8.196	2.705	level2			DEHYDROACETIC ACID	11.21	3.071				23.336	12.19	20.73	6.8887							Nalidixic acid	5e-05	-4.30103	60.3865	Chlormadinone Acetate	0.005	-2.30103	60.3865
CAR 14:1	17.233	14.578	3.614	level2	FA 18:2+4O	12.527	9.362		level2	2-((3aR,4S,7R,7aS)-1,3-Dioxohexahydro-1H-4,7-methanoisoindol-2(3H)-yl)propanoic acid	12.239	2.976	2.714	level2			4-Hydroxyhippuric acid sulfate	4.436					24.1173	12.2057	21.362	6.9202							o-Aminoazotoluene	5e-05	-4.30103	60.5475	Chlorsulfuron	0.005	-2.30103	60.5475
N-Oleoyl-L-serine	17.233	14.721	3.614	level2	Midazolam	13.162	9.398	1.17	level2	N-Acetyl-O-methyltyrosine	12.483	5.55	2.714	level2			dG-C8-2,4-DMA	20	17.351				22.496	12.2273	20.851	6.9456							Paclobutrazol	5e-05	-4.30103	60.7085	Chlorthiophos	0.005	-2.30103	60.7085
PC O-38:5	23.521	19.659	3.673	level2	Pinoxaden-TP NOA 407854	19.631	9.553		level2	Chlordiazepoxide	11.892	5.169	2.753	level2			3-Amino-5,6-dimethyl-2-pyrazinecarboxylic acid	8.038					23.579	12.2731	20.585	7.0003							Phorate sulfoxide	5e-05	-4.30103	60.8696	Cimaterol	0.005	-2.30103	60.8696
p-Hydroxyphenyllactic acid	10.392	1.535	3.755	level2	Phe-Leu	3.964	9.582	5.737	level2	2-Chloro-1-(5-chloro-2-methyl-1H-indol-3-yl)ethanone	8.197		2.768	level2			p-Hydroxyphenyllactic acid	10.392	1.535	3.755			22.14	12.2731	21.391	7.1127							Pyroquilon	5e-05	-4.30103	61.0306	Clenbuterol	0.005	-2.30103	61.0306
PC 38:5	23.051		3.793	level2	9-Hydroxyjasmesoside	13.017	10.596		level2	Castanospermine			2.772	level2			1-[(4-Fluorophenyl)sulfonyl]piperazine	6.743					21.792	12.2852	21.224	7.1696							Siduron	5e-05	-4.30103	61.1916	Clenproperol	0.005	-2.30103	61.1916
Trimethoprim	11.9195	5.09	3.957	level2	FA 18:2;O3	13.042	10.608		level2	Mevalonic acid	3.73	0.857	2.777	level2			Homovanillic acid sulfate	4.41		1.948			23.5475	12.3886	22.05	7.2158							Silthiofam	5e-05	-4.30103	61.3527	Clethodim Sulfone	0.005	-2.30103	61.3527
PC O-34:3|PC O-16:1_18:2	23.384	19.603	3.975	level2	14,15-Dehydro-16-epi-vincamine	13.65	10.643		level2	3-Hydroxy-4-methoxybenzoic acid	3.73		2.777	level2			DL-Ethionine	4.631		9.267			23.558	12.3886	20.894	7.2243							Thiobencarb	5e-05	-4.30103	61.5137	Clethodim	0.005	-2.30103	61.5137
Palmitoyleicosapentaenoyl phosphatidylcholine	22.555	19.189	3.996	level2	Propofol .beta.-D-glucuronide	13.395	10.746		level2	Orcinol	3.72		2.777	level2			N5-(1-Iminobutyl)-L-ornithine	4.854		7.006			21.871	12.3934	20.957	7.3008							Triadimefon	5e-05	-4.30103	61.6747	Clindamycin	0.005	-2.30103	61.6747
Succinis acid	3.492		4.314	level2	Dehydroisoandrosterone sulfate	13.802	11.585	1.146	level2	CMPF	11.888	5.535	2.783	level2			3-Sulfobenzoic acid	4.479					23.511	12.414	21.4848	7.3088							Triflumizole-amino	5e-05	-4.30103	61.8357	Clodinafop	0.005	-2.30103	61.8357
PC O-38:7	23.427	19.455	4.386	level2	[1,3-dihydroxy-1-(7-methoxy-2-oxochromen-6-yl)-3-methylbutan-2-yl] 3-methylbut-2-enoate	14.487	11.682		level2	3-Furancarboxylic acid, tetrahydro-4-methylene-2-octyl-5-oxo-, (2R,3S)-rel-	13.266	11.21	2.786	level2			N8-Acetylspermidine	7.956		8.768			21.1833	12.4513	21.55	7.3465							2-Hydroxy-4-methoxybenzophenone	5e-05	-4.30103	61.9968	Clonazepam	0.005	-2.30103	61.9968
1,2-Dipalmitoleoyl-sn-glycero-3-phosphocholine	22.403	19.116	4.408	level2	Methanesulfonamide, N-[3-(9H-carbazol-9-yl)-2-hydroxypropyl]-N-(2-furanylmethyl)-	14.4909	11.684		level2	1-Methylxanthine	10.393	2.866	2.798	level2			Ala-Tyr	12.674	7.83				24.0132	12.5379	20.65	7.3755							Acetochlor	5e-05	-4.30103	62.1578	Clorprenaline	0.005	-2.30103	62.1578
PC 32:1	22.865	19.352	4.408	level2	Terbinafine	14.376	11.712	2.008	level2	Glutaric acid	4.542		2.827	level2			Cyclamate	3.67	4.48				23.331	12.6174	21.731	7.3936							Alachlor	5e-05	-4.30103	62.3188	Codeine	0.005	-2.30103	62.3188
1-(1Z-Octadecenyl)-2-(4Z,7Z,10Z,13Z,16Z,19Z-docosahexaenoyl)-sn-glycero-3-phosphocholine	23.363		4.408	level2	Litracen	14.52	11.879	2.378	level2	2-[(4-Aminobenzoyl)amino]acetic acid	11.195	3.18	2.837	level2			N-Acetyl-L-carnosine	7.489		8.337			23.9	12.638	20.7942	7.4124							Bambuterol	5e-05	-4.30103	62.4799	Cyanofenphos	0.005	-2.30103	62.4799
PC O-37:5|PC O-15:1_22:4	21.5079		4.414	level2	piperettine	14.683	11.891		level2	3-Methoxy-4-hydroxyphenylglycol sulfate	10.379	1.671	2.842	level2			NAE 4:0	4.9634		6.969			23.236	12.6461	20.957	7.4449							Brompheniramine	5e-05	-4.30103	62.6409	Danofloxacin	0.005	-2.30103	62.6409
1-(1Z-Octadecenyl)-2-(5Z,8Z,11Z,14Z-eicosatetraenoyl)-sn-glycero-3-phosphocholine	23.521		4.451	level2	N-[2-(3,4-Dihydroxyphenyl)ethyl]-1-adamantanecarboxamide	14.683	11.891		level2	Acetyl-.beta.-alanine	4.704		2.857	level2			2-Amino-5,5,5-trifluoropentanoic acid	8.368		9.267			23.521	12.6534	21.426	7.4764							Chlorpyrifos	5e-05	-4.30103	62.8019	Desloratadine	0.005	-2.30103	62.8019
PC 40:8	22.462		4.465	level2	Irbesartan	20.93	12.051		level2	1-(2-Furanylmethyl)-5-oxo-3-pyrrolidinecarboxylic acid	11.6448		2.862	level2			2-Methylpyrrolidine	4.717	22.962	7.137			23.363	12.7462	20.334	7.5531							Cycloxydim	5e-05	-4.30103	62.963	Diaveridine	0.005	-2.30103	62.963
1,2-Diarachidonoyl-sn-glycero-3-phosphocholine	22.462		4.465	level2	BA 24:1;O4;G;S	3.948	12.196		level2	N-Methyl-L-serine	3.74837		2.96	level2			Piperidine	3.886					23.673	12.862	22.402	7.5969							Difloxacin hydrochloride	5e-05	-4.30103	63.124	Dimefuron	0.005	-2.30103	63.124
PC 40:6	23.5475		4.472	level2	5.beta.-Androstan-3.alpha.-ol-17-one sulfate	14.614	12.64	1.389	level2	Indole-3-acetyl-L-alanine	12.4		3.092	level2			O-HYDROXYHIPPURIC ACID	3.84	4.312				23.417	12.9524	22.402	7.5969							Disulfoton sulfone	5e-05	-4.30103	63.285	Dinitramine	0.005	-2.30103	63.285
3-Bromo-5-chloropyridin-2-ol	3.834		4.48	level2	BA 24:1;O3;G;S	14.975	12.891		level2	Arachidonoyl-1-thioglycerol	14.351	11.729	3.116	level2			Triethylene glycol methyl ether methacrylate	12.827	8.331				23.363	12.9856	21.6325	7.6689							Fensulfothion	5e-05	-4.30103	63.4461	Dioxybenzone	0.005	-2.30103	63.4461
PC O-36:4	23.4511		4.515	level2	1-Pyrrolidineheptanoic acid, 2-(3-hydroxyoctyl)-5-oxo-	15.716	13.176	3.94	level2	Mandelic acid sulfate	4.58		3.17	level2			Leu-Ala	4.824					22.342	13.31	22.73	7.8929							Fluazifop-butyl	5e-05	-4.30103	63.6071	Emamectin benzoate	0.005	-2.30103	63.6071
PC 38:7	22.657		4.522	level2	(9Z)-5,8,11-Trihydroxyoctadec-9-enoic acid	16.582	13.36	1.397	level2	3,4-Dihydroxycinnamic acid (L-alanine methyl ester) amide	12.296	6.671	3.182	level2			Tyr-Lys	3.867	4.558	5.979			22.679	13.534	21.608	7.9027							Hexaconazole	5e-05	-4.30103	63.7681	Enrofloxacin	0.005	-2.30103	63.7681
PC 36:4|PC 18:2_18:2	22.668	19.237	4.536	level2	FA 18:1;O3	16.582	13.36	1.397	level2	Picolinuric acid	10.409	3.686	3.217	level2			pGlu-Glu-Pro-amide	4.857					12.139	-2.7978	21.798	7.9498							Hydroquinidine	5e-05	-4.30103	63.9291	Etaconazole	0.005	-2.30103	63.9291
PC O-34:3	23.065	19.986	4.557	level2	NAGly 24:5	16.074	13.416	5.305	level2	1-Benzhydrylazetidine	12.161	5.841	3.24	level2			4-(1-Amino-2-carboxyethyl)benzoic acid	11.68	4.762	2.878					20.714	8.034							Ipconazole	5e-05	-4.30103	64.0902	Ethiprole	0.005	-2.30103	64.0902
PC O-34:2	23.532	19.688	4.599	level2	Lauryldiethanolamine	15.999	13.511	2.876	level2	3-AMINO-5-HYDROXYBENZOIC ACID	3.72		3.311	level2			5-Oxo-1-propyl-2-pyrrolidineacetic acid	4.759		5.936					21.671	8.059							Legurame	5e-05	-4.30103	64.2512	Ethofumesate	0.005	-2.30103	64.2512
PC 36:2	23.851	19.847	4.599	level2	FA 20:3;O2	16.159	13.784		level2	Hexylamine	10.38		3.386	level2			Octenoyl-carnitine; LC-tDDA; CE10	3.675		4.798					17.945	8.0679							Medroxyprogesterone acetate	5e-05	-4.30103	64.4122	Etobenzanid	0.005	-2.30103	64.4122
PE 30:0|PE 15:0_15:0	22.778	19.315	4.62	level2	[6]-Shogaol	16.55	13.942		level2	DL-2-Methylglutamic acid	3.749		3.396	level2			4-(Trifluoromethyl)benzylamine			8.737					21.1687	8.1196							Metconazole	5e-05	-4.30103	64.5733	Famphur	0.005	-2.30103	64.5733
PC O-32:1	23.347	19.598	4.62	level2	5-(8Z-Heptadecenyl)resorcinol	16.563	14.036	1.498	level2	N-Isobutyrylglycine	3.696	1.667	3.411	level2			Trimethoprim	11.9195	5.09	3.957					22.138	8.1267							Myclobutanil	5e-05	-4.30103	64.7343	Fenarimol	0.005	-2.30103	64.7343
1-(1Z-Octadecenyl)-2-(5Z,8Z,11Z,14Z-eicosatetraenoyl)-sn-glycero-3-phosphoethanolamine	24.0132		4.642	level2	Arg-Tyr-Arg	16.876	14.26		level2	Pantothenic acid	10.504	3.084	3.51	level2			3,4-Difluoro-L-phenylalanine	4.908							21.748	8.2251							Neburon	5e-05	-4.30103	64.8953	Fenpiclonil	0.005	-2.30103	64.8953
1-Oleoyl-2-myristoyl-sn-glycero-3-phosphocholine	22.865	19.352	4.663	level2	NAGly 24:4;O	16.359	14.409	5.218	level2	3-Methoxyamphetamine	12.252	5.982	3.524	level2			NCGC00381364-01!3-propan-2-yl-2,3,6,7,8,8a-hexahydropyrrolo[1,2-a]pyrazine-1,4-dione	4.42	4.77						23.3	8.283							Oxilinic acid	5e-05	-4.30103	65.0564	Fensulfothion-oxon-sulfone	0.005	-2.30103	65.0564
PE P-38:6|PE P-16:0_22:6	23.135		4.663	level2	BA 24:1;O3;T	16.471	14.423	5.499	level2	Metoprolol	12.35	6.896	3.651	level2			Metoprolol acid	13.89		5.619					21.67	8.3436							Progesterone	5e-05	-4.30103	65.2174	Fensulfothion-Sulfone	0.005	-2.30103	65.2174
PE P-36:4|PE P-16:0_20:4	23.278	19.548	4.685	level2	9Cl-PF3ONS (9-chlorohexadecafluoro-3-oxanonane-1-sulfonate) (major component of F-53B)	16.802	14.473	0.798	level2	5-(8Z-Heptadecenyl)resorcinol		14.089	3.659	level2			2-(4-Morpholinyl)-1-phenylethanol	3.907		1.373					22.206	8.3887							Propiconazole	5e-05	-4.30103	65.3784	Fenthion oxon	0.005	-2.30103	65.3784
PC O-32:0	24.1482	19.986	4.685	level2	NAGly 24:3;O	14.693	14.481	3.982	level2	Sitagliptin	12.376	7.065	3.801	level2			Phthalic acid	24.15		1.888					21.076	8.4241							Pyrimorph	5e-05	-4.30103	65.5395	Fleroxacin	0.005	-2.30103	65.5395
PE P-38:5|PE P-18:1_20:4	23.384	19.861	4.686	level2	glycohyodeoxycholic acid	14.693	14.481	3.982	level2	RIBOSE	4.534		3.94	level2			Pimelic acid	4.746	5.117	1.86					21.92	8.506							Salmeterol	5e-05	-4.30103	65.7005	Florasulam	0.005	-2.30103	65.7005
PC 30:0	22.8598		4.707	level2	1(3H)-Isobenzofuranone, 3-hydroxy-7-methoxy-	17.232	14.49		level2	3,4-Dihydro-3-oxo-2H-(1,4)-benzoxazin-2-ylacetic acid	10.382	2.794	3.943	level2			NAE 5:0	4.681		7.67					22.563	8.5318							Sulfachinoxalin	5e-05	-4.30103	65.8615	Flubendazole	0.005	-2.30103	65.8615
PE P-36:2|PE P-18:0_18:2	24.1173		4.728	level2	NAGly 24:3;O	17.1067	14.504		level2	HOMOVANILLIC ACID SULFATE	4.34	0.86	3.96	level2			3-(5,6-Dihydroxyheptyl)-4-methyl-2H-furan-5-one	14.017	10.855						21.81	8.6082							Carboxin	5e-05	-4.30103	66.0225	Flufenoxuron	0.005	-2.30103	66.0225
PE 38:4	23.7002		4.752	level2	5-Tetradecynoic acid	16.714	14.561		level2	Sinapic acid sulfate		4.155	3.995	level2			Monomethyl phthalate	17.23	14.666						23.91	8.6731							3-O-methyl-Colterol	5e-05	-4.30103	66.1836	Flumetsulam	0.005	-2.30103	66.1836
PE P-34:2|PE P-16:0_18:2	23.405	19.619	4.765	level2	Murocholic acid	23.792	14.627		level2	3-(2-Amino-4-methyl-6-oxo-1,6-dihydro-5-pyrimidinyl)propanoic acid	7.2		4.103	level2			(4-Methylphenyl)oxidanesulfonic acid	12.07	5.59						22.38	8.73							4,4'-Thiodianiline	5e-05	-4.30103	66.3446	Flurprimidol	0.005	-2.30103	66.3446
PE 38:6|PE 16:0_22:6	21.072		4.765	level2	CAR 16:3	17.197	14.65		level2	Ephedrine	11.782	4.319	4.105	level2			2-(Ethylsulfonyl)benzoic acid	12.723	8.21						21.6	8.7743							4-Benzoylbiphenyl	5e-05	-4.30103	66.5056	Fluthiacet-methyl	0.005	-2.30103	66.5056
PE 38:6	22.833		4.765	level2	CAR 14:1	17.225	14.683	3.632	level2	Pholedrine	11.782	4.319	4.105	level2			Morphine	12.264	6.44	2.927					22.717	8.8062							Amidosulfuron	5e-05	-4.30103	66.6667	Gatifloxacin	0.005	-2.30103	66.6667
PE 36:4|PE 18:2_18:2	23.805	19.395	4.787	level2	N-Oleoyl-L-serine	17.225	14.683	3.632	level2	Naltrexone	11.732	11.093	4.176	level2			[(4-Chlorophenyl)sulfonyl]acetic acid	5.319							22.833	8.8367							Arsanilic acid	5e-05	-4.30103	66.8277	Gliclazide	0.005	-2.30103	66.8277
PE 38:4|PE 18:0_20:4		20.73	4.796	level2	1H-Indazole-3-carboxamide, N-[1-(aminocarbonyl)-2,2-dimethylpropyl]-1-(5-hydroxypentyl)-	17.309	14.833		level2	4-Dimethylamino-2',4',6'-trimethoxychalcone	11.732	11.093	4.176	level2			Hydroxysebacic acid	11.883		2.695					22.532	8.8392							Benzofenap	5e-05	-4.30103	66.9887	Haloperidol	0.005	-2.30103	66.9887
Octenoyl-carnitine; LC-tDDA; CE10	3.675		4.798	level2	Tetradecyldiethanolamine	17.6155	14.963		level2	2-(2,6-Dimethylmorpholin-4-yl)ethanol	3.793		4.19	level2			(E)-3,10-Dihydroxy-4,9-dimethyldodec-6-enedioic acid	12.273		1.4					22.584	8.8403							Chlorantraniliprole	5e-05	-4.30103	67.1498	Halosulfuron-methyl	0.005	-2.30103	67.1498
PE 36:2|PE 18:1_18:1	23.8183		4.824	level2	FA 14:1	17.368	14.973		level2	1,7-DIMETHYLURIC ACID	3.589	2.593	4.241	level2			Propamocarb	8.319		9.15					22.682	8.8998							Chlorbromuron	5e-05	-4.30103	67.3108	Heptenophos	0.005	-2.30103	67.3108
2-Arachidonoyl-1-palmitoyl-sn-glycero-3-phosphoethanolamine	22.945	19.395	4.828	level2	11-HETE	17.017	15.005	1.074	level2	Nadolol	13.005	9.571	4.257	level2			Methyl 5-bromo-2-(methylamino)benzoate			6.83					22.258	8.9733							Chlormadinone Acetate	5e-05	-4.30103	67.4718	Hydroxyhomosildenafil	0.005	-2.30103	67.4718
PE 36:4|PE 16:0_20:4	21.755	22.92	4.828	level2	Tri(butoxyethyl) phosphate	17.64	15.032		level2	O-PHOSPHO-L-SERINE	4.948		4.309	level2			N-[3-(Dimethylamino)propyl]propanamide	7.87		8.672					22.123	8.9983							Cimaterol	5e-05	-4.30103	67.6329	Hydroxyprogesterone	0.005	-2.30103	67.6329
PE 34:2|PE 16:0_18:2	23.056	19.459	4.861	level2	NAE 18:4	17.655	15.113		level2	4-(2,5-Diethoxy-4-nitrophenyl)morpholine	12.73	4.742	4.324	level2			INDOXYL SULFATE	6.33	3.971						23.15	9.0053							Clenproperol	5e-05	-4.30103	67.7939	Isopropalin	0.005	-2.30103	67.7939
PE 36:3|PE 18:1_18:2	23.167	19.496	4.869	level2	13-Keto-9Z,11E-octadecadienoic acid	18.818	15.156		level2	TIGLIC ACID	3.87		4.35	level2			Sulfamethoxazole	12.1533	5.557						22.0828	9.0514							Clethodim Sulfone	5e-05	-4.30103	67.9549	Ketoconazole	0.005	-2.30103	67.9549
PE 36:2|PE 18:0_18:2	23.288		4.873	level2	FA 16:3	17.593	15.212		level2	5-Butyl-1H-pyrazole-3-carboxylic acid	3.743	1.254	4.371	level2			Daidzein 4'-sulfate		7.898						23.94	9.06							Clorprenaline	5e-05	-4.30103	68.1159	Ketoprofen	0.005	-2.30103	68.1159
NAGly 24:3;O	16.633	14.657	4.914	level2	9-Oxo-10E,12Z-octadecadienoic acid	17.913	15.284	1.047	level2	Aniline	3.94		4.397	level2			D-3-Cyclohexylalanine	12.21		7.268					24	9.0632							Desloratadine	5e-05	-4.30103	68.277	Ketorolac	0.005	-2.30103	68.277
glycohyodeoxycholic acid	16.633	14.657	4.914	level2	LPC 16:2		15.287		level2	Bis(p-nitrophenyl)phosphate	3.835		4.459	level2			Pestalotin	12.832	8.331	1.334					21.9827	9.1644							Dimefuron	5e-05	-4.30103	68.438	Leucocrystal violet	0.005	-2.30103	68.438
Gramine	3.856		4.952	level2	NAE 17:3	17.7	15.35		level2	Cyclamate	3.696	4.573	4.537	level2			Curvulin	12.658							21.954	9.1644							Etaconazole	5e-05	-4.30103	68.599	Lincomycin	0.005	-2.30103	68.599
SM 42:3;O2	21.1833		5.038	level2	1,3-Benzenediol, 5-(10-nonadecenyl)-, (Z)-	17.9717	15.364		level2	Octenoyl-carnitine; LC-tDDA; CE10	12.733	8.078	4.551	level2			His-Trp	7.242	2.977	8.051					23.04	9.2293							Fenthion oxon	5e-05	-4.30103	68.7601	Malachite green cation	0.005	-2.30103	68.7601
N-[2-(1H-Indol-3-yl)ethyl]propanamide	4.134		5.093	level2	CAR 15:1	18.013	15.435		level2	5-Methyl-8-quinolinol	11.8507	4.764	4.575	level2			Voriconazole N-oxide	7.307		8.223					21.819	9.3305							Flurprimidol	5e-05	-4.30103	68.9211	Mebendazole	0.005	-2.30103	68.9211
SM 41:2;O2	21.792		5.221	level2	7.alpha.-Hydroxy-3-oxo-4-cholestenoic acid	18.151	15.49		level2	2-[(3-Ethoxy-3-oxopropanoyl)amino]benzoic acid	3.653	3.704	4.611	level2			(2R)-2-[(2R,5S)-5-[(2S)-2-hydroxybutyl]oxolan-2-yl]propanoic acid	12.912	8.458						22.563	9.3375							Heptenophos	5e-05	-4.30103	69.0821	Mebendazole-amine	0.005	-2.30103	69.0821
SM 40:3;O2|SM 18:1;O2/22:2	23.7691		5.234	level2	C12-AE1S (TENTATIVE)	18.032	15.491		level2	N-Cyclopentyl-2-(1-piperazinyl)-4-quinazolinamine	12.8491		4.652	level2			5-Butyl-1H-pyrazole-3-carboxylic acid	3.816							23.95	9.4533							Ketorolac	5e-05	-4.30103	69.2432	Mefenamic Acid	0.005	-2.30103	69.2432
SM 40:2;O2	20.6586	20.22	5.235	level2	CAR 20:5	18.104	15.506	3.354	level2	Dimethachlor-TP CGA 369873	11.635	4.798	4.676	level2			NCGC00380688-01_C13H16O4_1-[3-Hydroxy-2-(2-hydroxy-2-propanyl)-2,3-dihydro-1-benzofuran-5-yl]ethanone	14.998	14.665						23.258	9.456							Leucocrystal violet	5e-05	-4.30103	69.4042	Megestrol	0.005	-2.30103	69.4042
SM 39:1;O2	21.4395		5.242	level2	LPC 14:0	18.171	15.529	5.645	level2	N-(4-Chlorophenyl)-2-hydroxy-9H-carbazole-3-carboxamide	3.787		4.694	level2			3-Oxo-1,8-octanedicarboxylic acid	10.34		1.615					22.717	9.8316							Mebendazole-amine	5e-05	-4.30103	69.5652	Mesosulfuron-methyl	0.005	-2.30103	69.5652
SM 38:2;O2	23.631		5.242	level2	3-Hydroxyhexadecanoylcarnitine	18.212	15.615	4.936	level2	Succinis acid	4.8	0.691	4.74	level2			N-(2-Hydroxy-3-methylbutanoyl)leucine	10.4		1.906					22.049	9.9398							Mefenamic Acid	5e-05	-4.30103	69.7262	Metazosulfuron	0.005	-2.30103	69.7262
1-(1Z-Octadecenyl)-sn-glycero-3-phosphocholine	20.48	17.732	5.252	level2	17alpha-Methyltestosterone	20.088	15.625		level2	1-Aminocyclopropane-1-carboxylic acid	3.71		4.771	level2			Gabapentin Related Compound E	12.77	5.405	1.677					22.364	10.0626							Metazosulfuron	5e-05	-4.30103	69.8873	Metosulam	0.005	-2.30103	69.8873
N-Oleoyl-D-erythro-sphingosylphosphorylcholine	22.865	19.357	5.264	level2	CAR 16:1	18.29	15.656	3.486	level2	N-(2-Hydroxy-3-methylbutanoyl)valine	12.37	7.319	4.789	level2			NAE 6:0	4.38559		6.454					22.3621	10.1107							Nadifloxacin	5e-05	-4.30103	70.0483	Mevinphos	0.005	-2.30103	70.0483
LPC 24:0/0:0	21.958	18.895	5.272	level2	Dipentyl phthalate		15.66		level2	(2R)-2,4-Dihydroxy-3,3-dimethylbutanoic acid	3.722	1.163	4.792	level2			Metribuzin-desamino	4.919							19.769	10.2395							Niflumic Acid	5e-05	-4.30103	70.2093	Moxifloxacin	0.005	-2.30103	70.2093
NAGly 24:5	16.05	13.435	5.274	level2	LPC 20:5	18.324	15.66		level2	4-Morpholinopropanesulfonic acid	3.722	3.717	4.834	level2			2,3-Quinolinedicarboxylic acid	4.954							23.199	10.305							Oseltamivir	5e-05	-4.30103	70.3704	Nadifloxacin	0.005	-2.30103	70.3704
SM 35:2;O2	22.544	19.187	5.278	level2	LPE 20:5	18.368	15.705	5.697	level2	Tyr-Thr	4.606		4.834	level2			Ethyl 3-amino-4-(methylsulfonyl)-5-(methylthio)thiophene-2-carboxylate	5.58		7.78					22.33	10.3299							Oxfendazole	5e-05	-4.30103	70.5314	Neotame	0.005	-2.30103	70.5314
SM 35:1;O2	23.192	19.496	5.278	level2	N-Oleoylglycine	17.93	15.786		level2	N-ACETYL-L-ALANINE	4.704		4.891	level2			2H-Pyran-2-one, tetrahydro-4-hydroxy-6-pentyl-	13.131	7.689						22.233	10.3948							Phenformin	5e-05	-4.30103	70.6924	Nifedipine	0.005	-2.30103	70.6924
SM 34:1;O2|SM 18:1;O2/16:0	22.8746	19.31	5.285	level2	CAR 17:2	18.386	15.786		level2	ETHOSUXIMIDE	3.927		4.935	level2			Carbaryl			1.334					22.94	10.4033							Phenylbutazone	5e-05	-4.30103	70.8535	Niflumic Acid	0.005	-2.30103	70.8535
SM 34:2;O2	3.767		5.292	level2	LPC 16:1	18.499	15.814		level2	1-(4-Piperidinyl)-2-pyrrolidinone	4.321		4.948	level2			2-{2-[2-(Acryloyloxy)-1-methylethoxy]-1-methylethoxy}-1-methylethyl acrylate	14.596							22.673	10.4527							Piroxicam	5e-05	-4.30103	71.0145	Nitrendipine	0.005	-2.30103	71.0145
SM 33:1;O2|SM 17:1;O2/16:0	22.424	19.138	5.3	level2	LPE 16:1	19.396	15.859	5.655	level2	N-Benzyloxycarbonylglycine	3.799		4.974	level2			Pro-Leu-Lys	8.271		9.084					18.829	10.4635							Pyrazoxyfen	5e-05	-4.30103	71.1755	Norfludiazepam	0.005	-2.30103	71.1755
BA 24:1;O3;G;S	15.107	13.053	5.327	level2	LPC 15:0	18.534	15.864	5.762	level2	Uridine	4.642		5.001	level2			Dimethyl suberate	13.642	6.861						22.844	10.496							Quinocetone	5e-05	-4.30103	71.3366	Norharman	0.005	-2.30103	71.3366
LPC O-24:0	22.359	19.116	5.329	level2	NAE 16:0	18.46	15.875	1.076	level2	N2-(1-Oxo-4-phenylbutyl)-L-glutamine	12.862	7.874	5.184	level2			Benzylacetate	7.87		8.722					22.304	10.6042							Sparfloxacin	5e-05	-4.30103	71.4976	Orbifloxacin	0.005	-2.30103	71.4976
PYRUVIC ACID	4		5.342	level2	NAE 18:3	18.453	15.875		level2	N-3-Hydroxydecanoyl-L-homoserine lactone	12.426	6.423	5.263	level2			N,N-Dimethylaniline	5.459							23.511	10.6118							Spirotetramat-mono-hydroxy	5e-05	-4.30103	71.6586	Oseltamivir	0.005	-2.30103	71.6586
LPC O-24:2	21.365	18.512	5.358	level2	LPG 16:1	18.449	15.892	5.576	level2	Norfloxacin	3.795	5.403	5.308	level2			alpha,beta-Dihydroresveratrol			3.159					20.242	10.6372							Sulfamoxole	5e-05	-4.30103	71.8196	Oxadiazon	0.005	-2.30103	71.8196
Phenylalanine betaine	3.907		5.362	level2	CAR 15:0	18.514	15.902	3.334	level2	2-Methylbutyryl-L-carnitine	3.885		5.328	level2			Ethyl 4-(1-hydroxy-1-methylethyl)-2-propyl-1H-imidazole-5-carboxylate	6.398		7.583					23.061	10.6621							Sulfisoxazole	5e-05	-4.30103	71.9807	Oxarbazepine	0.005	-2.30103	71.9807
Cyclohexyl(phenyl)[3-(piperidin-1-yl)propyl]silanol	13.5	10.463	5.379	level2	3-Hydroxyoleylcarnitine	18.538	15.912	4.844	level2	Myriocin	14.343	10.031	5.331	level2			6-hydroxynaphthalene-2-sulfonate	12.547	7.959						23.511	10.72							Sulindac	5e-05	-4.30103	72.1417	Oxfendazole	0.005	-2.30103	72.1417
LPC 20:4/0:0	19.041	17.692	5.392	level2	CAR 22:6	18.614	15.975	1.128	level2	Pyroglutamyl-Isoleucine	4.669	5.303	5.34	level2			Ethyl 3-(2,2,2-Trifluoroacetyl)benzoate			6.944					23.9496	10.7285							Tolbutamide	5e-05	-4.30103	72.3027	Oxfendazole-Sulfone	0.005	-2.30103	72.3027
MMV688469	3.777		5.393	level2	Arachidonoyl-carnitine; LC-tDDA; CE20	18.642	16.012	2.804	level2	Pirimicarb-desamido	4.09		5.34	level2			FA 9:0+1O	12.369	6.456						23.3241	10.7934							Vildagliptin	5e-05	-4.30103	72.4638	Papaverine	0.005	-2.30103	72.4638
LysoPC(0:0/18:0)	20.204	17.492	5.399	level2	NAE 21:2	18.669	16.073	1.668	level2	Thr-Tyr	12.003	6.125	5.364	level2			9-Hydroxynonanoic acid	12.369	6.978	1.307					23.04	10.8428							Zilpaterol	5e-05	-4.30103	72.6248	Penfluridol	0.005	-2.30103	72.6248
1-Oleoyl-sn-glycero-3-phosphocholine	20.708	16.744	5.42	level2	FA 17:2	18.554	16.119		level2	Buspirone	13.276	10.148	5.37	level2			Chenodeoxycholic acid 24-acyl-.beta.-D-glucuronide	4.525							23.907	10.8612							Acetil acid	5e-05	-4.30103	72.7858	Penoxsulam	0.005	-2.30103	72.7858
LPC 20:5/0:0	3.692	15.691	5.427	level2	LPC 22:6	18.846	16.151		level2	6-Amino-1-hexanol	3.865		5.375	level2			Gliclazide	14.236	11.359						21.403	10.9525							Diclofenac Acid	5e-05	-4.30103	72.9469	Phenformin	0.005	-2.30103	72.9469
Urobilin	12.884	9.839	5.434	level2	LPS 18:2	18.69	16.157		level2	N-(3-Piperidinyl)acetamide	4.25398		5.396	level2			4-[(Phenylcarbonyl)amino]butanoic acid	3.762							22.728	10.9694							Ganciclovir	5e-05	-4.30103	73.1079	Phenylbutazone	0.005	-2.30103	73.1079
LPC 17:0/0:0	3.656	16.832	5.434	level2	Choline chloride	20.208	16.161	8.591	level2	7-Methylguanine; LC-tDDA; CE10	4.018	3.137	5.438	level2			3-{[(5-Chloro-2-pyridinyl)amino]carbonyl}-2-pyrazinecarboxylic acid	4.782		6.838					22.934	10.9943							Josamycin	5e-05	-4.30103	73.2689	Piroxicam	0.005	-2.30103	73.2689
LPC 18:2/0:0	19.078	16.209	5.469	level2	LPC 20:4	18.863	16.168	5.409	level2	Cyclohexyl(phenyl)[3-(piperidin-1-yl)propyl]silanol	12.56	10.471	5.491	level2			Hydroxydehydronifedipinecarboxylic acid	12.314	6.436	1.942					23.098	11.0089							Pyridalyl	5e-05	-4.30103	73.43	Procaterol	0.005	-2.30103	73.43
LPC 16:1/0:0	18.754	15.857	5.496	level2	LPI 18:2	18.757	16.174		level2	2,3-Dihydroxy-2-methylbutanoic acid	4.044		5.492	level2			PROPYLPARABEN	13.962							23.368	11.0197							Ritodrine	5e-05	-4.30103	73.591	Promethazine	0.005	-2.30103	73.591
LPC O-20:0	21.156	18.352	5.496	level2	cis-7-Hexadecenoic acid	19.153	16.175	1.041	level2	3-Hydroxy-3',4'-Dimethoxyflavone	8.672		5.515	level2			Methyl hydrogen azelate	12.912	8.096						23.13	11.0273							Sulfentrazone	5e-05	-4.30103	73.752	Propyrisulfuron	0.005	-2.30103	73.752
LPC 18:3/0:0	3.719	15.693	5.509	level2	LPC 18:2	18.871	16.175	5.454	level2	L-Fucitol	4.133	0.863	5.536	level2			6,10a-dihydroxy-4-(hydroxymethyl)-4,7,11b-trimethyl-1,2,3,4a,5,6,6a,7,11,11a-decahydronaphtho[2,1-f][1]benzofuran-9-one	12.69	9.851	1.379					17.393	11.0525							Aminocyclopyrachlor	5e-05	-4.30103	73.913	Pseudovardenafil	0.005	-2.30103	73.913
LPC 18:3	18.557	15.905	5.509	level2	LPE 22:6	18.886	16.187	5.534	level2	8-Acetamido-2-methyl-7-oxononanoic acid	3.92883		5.55	level2			1-Ethyl-6,11-dihydroxy-3-methyl-10-methylenedodecahydro-3,6a,12-(epiethane[1,1,2]triyl)-9,11a-methanoazuleno[2,1-b]azocin-8(9H)-one	18.924	16.186						23.626	11.168							Chloramphenicol	5e-05	-4.30103	74.0741	Pyrazoxyfen	0.005	-2.30103	74.0741
Metformin			5.512	level2	LPE 20:4	3.7	16.206	5.547	level2	5-Acetylamino-6-amino-3-methyluracil	4.111		5.586	level2			2-Methyl-3-oxo-5,6-diphenyl-2,3-dihydro-4-pyridazinecarboxylic acid			8.019					22.356	11.1777							Perfluoroheptanesulfonic acid	5e-05	-4.30103	74.2351	Quinocetone	0.005	-2.30103	74.2351
LPC 15:0/0:0	18.971	16.314	5.607	level2	LPE 18:2	3.755	16.213	5.72	level2	trans-Epoxysuccinyl-L-leucylamido(4-guanidino)butane	3.845		5.61	level2			trans-Traumatic acid			1.379					22.517	11.2183							Perfluorohexanesulfonate (PFHxS)	5e-05	-4.30103	74.3961	Salbutamol	0.005	-2.30103	74.3961
LPA 18:1	20.517	17.261	5.611	level2	LPI 20:4	18.757	16.219		level2	2-Amino-2-methyl-1-propanol	4.24		5.614	level2			5-(2-Methyl-4-nitrophenyl)-2-furoic acid		7.334						23.637	11.2231							4-Chloro-5-(p-tolyl)-1H-imidazole-2-carbonitrile	5e-05	-4.30103	74.5572	Sarafloxacin	0.005	-2.30103	74.5572
LPC 14:0	18.174	15.56	5.614	level2	LPS 22:6	18.713	16.228	6.408	level2	Valproic acid .beta.-D-glucuronide	3.72	9.366	5.616	level2			LPI 18:2	19.09	16.542						24.088	11.2847							Diphenyl phosphate	5e-05	-4.30103	74.7182	Sparfloxacin	0.005	-2.30103	74.7182
Buprenorphine	18.433	15.814	5.614	level2	LPI 22:6	18.757	16.237		level2	Trachelanthine	12.451	6.97	5.62	level2			Dimethyl azelate	12.912	8.458						24.1111	11.2847							Isoxaflutole	5e-05	-4.30103	74.8792	Spirotetramat ketohydroxy	0.005	-2.30103	74.8792
Metoprolol acid	13.89		5.619	level2	NAE 20:0	18.86	16.277		level2	N2,N2-Dimethylguanosine	4.014	4.753	5.621	level2			Azasetron	14.0707	11.174						20.073	11.3389							Monalide	5e-05	-4.30103	75.0403	Spirotetramat-mono-hydroxy	0.005	-2.30103	75.0403
LPE O-18:1	20.5376	17.759	5.65	level2	LPG 18:2	18.856	16.277		level2	Metoprolol acid	11.772	4.903	5.648	level2			6,8-Dimethyl-4-hydroxycoumarin	3.72885		2.783					23.003	11.3595							Nicarbazin	5e-05	-4.30103	75.2013	Sulfamoxole	0.005	-2.30103	75.2013
LPE O-18:2	19.966	17.252	5.667	level2	LPC 17:1	18.996	16.293		level2	Isobutyryl-carnitine; LC-tDDA; CE10	4.034	3.023	5.673	level2			Gibberellin A4	6.33813	2.712						20.44	11.392							Perfluorooctanesulfonate (PFOS)	5e-05	-4.30103	75.3623	Sulfaphenazole	0.005	-2.30103	75.3623
LPA 18:0	21.471	18.765	5.67	level2	neoandrographolide	18.843	16.302		level2	1-Allylpiperazine	4.228		5.68	level2			INDOLEPROPIONIC ACID	11.938	8.4						23.511	11.399							Perfluorooctanoic acid	5e-05	-4.30103	75.5233	Sulfapyrazole	0.005	-2.30103	75.5233
LPE 16:0	19.453	16.789	5.68	level2	1-Ethyl-6,11-dihydroxy-3-methyl-10-methylenedodecahydro-3,6a,12-(epiethane[1,1,2]triyl)-9,11a-methanoazuleno[2,1-b]azocin-8(9H)-one	18.94	16.304		level2	Nonanohydrazide	4.02		5.716	level2			3-Bromo-5-chloropyridin-2-ol	3.834		4.48					21.969	11.4017							2,2'-Dihydroxy-4,4'-dimethoxybenzophenone	5e-05	-4.30103	75.6844	Sulfasalazine	0.005	-2.30103	75.6844
LPA 18:3	20.517	17.775	5.732	level2	LPG 22:6	18.858	16.339	5.334	level2	N-Demethylsambutoxin	17.103	14.553	5.719	level2			Gramine	3.856		4.952					23.109	11.4471							2,4-Dihydroxybenzophenone	5e-05	-4.30103	75.8454	Sulfisoxazole	0.005	-2.30103	75.8454
LPE 18:2	19.849	16.245	5.733	level2	CAR 18:2	18.649	16.344	2.905	level2	Cilostazol	12.684		5.719	level2			ascr#17	12.558	9.325	1.315					21.7534	11.5087							3-Chloro-7-hydroxy-4-methylcoumarin	5e-05	-4.30103	76.0064	Sulindac	0.005	-2.30103	76.0064
LPA 16:1	3.739	17.326	5.744	level2	3-Hydroxy-2-((9Z,12Z)-octadeca-9,12-dienoyloxy)propyl 2-(trimethylazaniumyl)ethyl phosphate	3.71713	16.377		level2	1-Hydroxy-1-(4-methoxyphenyl)propan-2-yl hexopyranoside	4.507		5.721	level2			Piroxicam	13.304	9.484						22.7569	11.5256							Acifluorfen	5e-05	-4.30103	76.1675	Tebupirimfos	0.005	-2.30103	76.1675
LPE 20:4	3.771	17.547	5.784	level2	LPC 22:5	19.313	16.403		level2	N-Acetyl-D-galactosamine 4-sulfate	4.646	0.789	5.737	level2			1-Decanoyl-2-hydroxy-sn-glycero-3-phosphocholine	15.459	12.829						22.833	11.5337							Benzyl 4-hydroxybenzoate	5e-05	-4.30103	76.3285	Terfenadine	0.005	-2.30103	76.3285
LPE 18:0	20.226	17.505	5.795	level2	CAR 17:1	19.051	16.409	3.335	level2	O6-MeG	4.011		5.772	level2			LPI 18:1	19.705	17.088						22.823	11.6084							Bis[2-(perfluorohexyl)ethyl] phosphate	5e-05	-4.30103	76.4895	Tetrachlorvinphos	0.005	-2.30103	76.4895
1-Stearoyl-2-arachidonoyl-sn-glycero-3-phospho-(1'-myo-inositol)	22.758	19.216	5.824	level2	5-(Tetradecyloxy)-2-furoic acid	19.103	16.414		level2	(+)-Lupanine	4.215		5.773	level2			Pesticide5_Tricyclazole_C9H7N3S_Beam	12.554							22.823	11.6084							Bisphenol M	5e-05	-4.30103	76.6506	Thifensulfuron-methyl	0.005	-2.30103	76.6506
PI 38:4	22.69		5.831	level2	Glycerol 1-myristate	19.107	16.414		level2	Matrine	4.215		5.773	level2			CMPF	11.906	5.553	1.4					23.877	11.623							Clomeprop	5e-05	-4.30103	76.8116	Tolbutamide	0.005	-2.30103	76.8116
2,3-bis-(4-Hydroxyphenyl)propionitrile	4.24835		5.834	level2	8-(3-Octyl-2-oxiranyl)octanoic acid	18.373	16.415	1.09	level2	1-(2-Naphthylsulfonyl)piperidine-3-carboxylic acid	4.161		5.791	level2			N-(2-Pyridinyl)-2-(1,3,5-trimethyl-1H-pyrazol-4-yl)acetamide	12.977	6.438						23.18	11.6338							Desmethyl Norflurazon	5e-05	-4.30103	76.9726	Triclabendazole	0.005	-2.30103	76.9726
PI 38:4|PI 18:0_20:4	3.79	20.99	5.874	level2	2,4-Di-tert-butylphenol	18.6	16.42		level2	Acamprosate	7.663		5.8	level2			isorhamnetin	8.852							3.672	11.6414							Dichlorprop	5e-05	-4.30103	77.1337	Trimethoprim	0.005	-2.30103	77.1337
PI 38:5|PI 18:1_20:4			5.879	level2	CAR 22:5	19.087	16.424	3.187	level2	Thymol blue	3.816		5.853	level2			6-[(E)-2,8-Dihydroxy-5,7-dimethylnon-5-enyl]-4-hydroxy-3-methylpyran-2-one	14.913							21.5693	11.729							Ethopabate	5e-05	-4.30103	77.2947	Tris(2-isopropylphenyl) phosphate	0.005	-2.30103	77.2947
PI 36:4|PI 16:0_20:4		20.136	5.904	level2	N-Nervonoyltaurine	19.087	16.424		level2	Cediranib	3.814	6.353	5.865	level2			Isophorone	13.348							21.511	11.729							Flufenamic acid	5e-05	-4.30103	77.4557	Vildagliptin	0.005	-2.30103	77.4557
5-Oxo-1-propyl-2-pyrrolidineacetic acid	4.759		5.936	level2	LPC 20:3	19.227	16.515	5.292	level2	1-(Cyclopropylcarbonyl)-3-piperidinamine	4.57321		5.866	level2			LPI 20:4	19.065	16.564						23.427	11.7496							Flutolanil	5e-05	-4.30103	77.6167	Voglibose	0.005	-2.30103	77.6167
3-Acetoxypyridine			5.936	level2	CAR 20:3	19.1284	16.524		level2	4-Hydroxyhippuric acid	3.808	1.96	5.876	level2			Sebacic acid monomethyl ester	13.374	9.857						19.134	11.7745							Heptyl 4-hydroxybenzoate	5e-05	-4.30103	77.7778	Zilpaterol	0.005	-2.30103	77.7778
PI 36:2|PI 18:0_18:2	3.827	21.05	5.937	level2	LPS 20:3	19.093	16.535		level2	1-Decanoyl-2-hydroxy-sn-glycero-3-phosphocholine	15.443	12.83	5.896	level2			(S)-(-)-Perillic acid	13.082	9.548						23.109	11.8578							Methoxyfenozide	5e-05	-4.30103	77.9388	MQCA	0.005	-2.30103	77.9388
PI 34:2|PI 16:0_18:2		20.158	5.954	level2	LPE 20:3	19.997	16.544		level2	His-Pro	4.36945		5.904	level2			(Z)-9,12,13-Trihydroxyoctadec-15-enoic acid			1.386					21.871	11.8654							Naproanilide	5e-05	-4.30103	78.0998	(4-Chloro-2-methylphenoxy)acetic acid	0.005	-2.30103	78.0998
(4R)-3-methylidene-4-[(E)-3-methyl-4-(4-methyl-5-oxooxolan-2-yl)but-2-enyl]oxolan-2-one	3.917	4.558	5.973	level2	NAE 22:4	19.254	16.549		level2	Mepirizole	4.36945		5.904	level2			Acetyl-sulfamethoxazole	11.686	6.861						21.7056	11.8903							Neburon	5e-05	-4.30103	78.2609	Mono(2-ethyl-5-oxohexyl)phthalate	0.005	-2.30103	78.2609
Tyr-Lys	3.867	4.558	5.979	level2	CAR 20:4	18.642	16.555	1.128	level2	2-Hydroxybenzamide	10.357	0.826	5.938	level2			(4R)-3-methylidene-4-[(E)-3-methyl-4-(4-methyl-5-oxooxolan-2-yl)but-2-enyl]oxolan-2-one	3.917	4.558	5.973					20.127	11.8951							Niflumic Acid	5e-05	-4.30103	78.4219	1H,1H,2H,2H-Perfluorodecanesulfonic acid	0.005	-2.30103	78.4219
N5-(1-Iminoethyl)-L-ornithine	4.25		6.098	level2	FA 19:3	19.222	16.556		level2	Asparagine methyl ester	4.50537		5.943	level2			cis-10,11-Dihydroxy-10,11-dihydrocarbamazepine	12.67		1.678					23.6244	11.9157							Oryzalin	5e-05	-4.30103	78.5829	1H,1H,2H,2H-Perfluorohexanesulfonic acid	0.005	-2.30103	78.5829
2-[(2-Ethylbutanoyl)amino]-4,5-dimethoxybenzoic acid	4.284	3.591	6.236	level2	LPG 16:0	19.446	16.56	5.43	level2	1-Methyluric acid	4.188	1.29	5.968	level2			8-Hydroxy-3-(7-hydroxyheptyl)-6-oxo-3,4-dihydroisochromene-7-carboxylic acid	13.732							23.74	11.9409							Pentacosafluorotridecanoic acid	5e-05	-4.30103	78.744	2,2’,4,4’-Tetrahydroxybenzophenone	0.005	-2.30103	78.744
Dothiepin	4.284	3.591	6.236	level2	FA 20:5	18.541	16.569	1.02	level2	Azithromycin	12.578	8.863	6.019	level2			3-(2-Chlorophenyl)-1H-pyrazole-5-carboxylic acid	3.826							20.611	11.9482							Propanil	5e-05	-4.30103	78.905	2,2'-Dihydroxy-4,4'-dimethoxybenzophenone	0.005	-2.30103	78.905
Allopurinol riboside	4.36199		6.274	level2	FA 20:5;O2	19.021	16.569		level2	Enterolactone	13.267	9.509	6.032	level2			MMV688469	3.777		5.393					23.637	11.9552							Triclabendazole	5e-05	-4.30103	79.066	2,4-Dichlorophenoxyacetic acid	0.005	-2.30103	79.066
D-erythro-Sphingosine-1-phosphate	4.454	16.046	6.323	level2	NAE 22:6	20.798	16.596		level2	L-.beta.-Homoglutamine	7.427		6.047	level2			LPI 18:0	20.41							22.473	12.0488							Cyclamic acid	5e-05	-4.30103	79.2271	2,4-Dihydroxybenzophenone	0.005	-2.30103	79.2271
BA 24:1;O4;G;S		10.622	6.338	level2	CAR 19:2	19.3132	16.596		level2	3-METHYLADENINE	4.475	3.463	6.088	level2			6-[3-(Trifluoromethyl)anilino]-3-pyridinesulfonamide	12.418	6.861						23.0694	12.0818							Estrone	5e-05	-4.30103	79.3881	3-Chloro-7-hydroxy-4-methylcoumarin	0.005	-2.30103	79.3881
NAE 6:0	4.38559		6.454	level2	NAE 21:1	19.238	16.613	1.645	level2	N6-Methyladenine	4.475		6.088	level2			3-Pyridinecarboxylic acid, 2-[(4-oxo-4H-1-benzopyran-3-yl)methylene]hydrazide	4.804		6.866					3.67	12.1143							Perfluorotetradecanoic acid	5e-05	-4.30103	79.5491	Acifluorfen	0.005	-2.30103	79.5491
Methyl 5-bromo-2-(methylamino)benzoate			6.83	level2	LPE 22:5	19.342	16.623		level2	5.alpha.-Androstan-3.beta.-ol-17-one glucosiduronate	14.367	12.251	6.095	level2			Praziquantel	8.745							23.857	12.1321							Tolfenpyrad	5e-05	-4.30103	79.7101	alpha-Zearalenol	0.005	-2.30103	79.7101
3-{[(5-Chloro-2-pyridinyl)amino]carbonyl}-2-pyrazinecarboxylic acid	4.782		6.838	level2	Arachidonic acid	19.094	16.641	1.018	level2	Oroxyloside	4.629	5.805	6.106	level2			2-(3-Carboxy-4-chlorophenyl)-1,3-dioxo-2,3-dihydro-1H-isoindole-5-carboxylic acid	8.776		8.624					23.853	12.1397							Chlorimuron-ethyl	5e-05	-4.30103	79.8712	Bentazone	0.005	-2.30103	79.8712
3-Pyridinecarboxylic acid, 2-[(4-oxo-4H-1-benzopyran-3-yl)methylene]hydrazide	4.804		6.866	level2	LPS 16:0	19.303	16.659	6.54	level2	oroxindin	4.629	6.374	6.106	level2			FA 13:3+1O			1.379					23.678	12.1478							Glimepiride	5e-05	-4.30103	80.0322	Benzovindiflupyr	0.005	-2.30103	80.0322
Ilicicolin B	19.206	16.496	6.868	level2	LPI 16:0	19.328	16.665		level2	1-O-((2E,4E)-9-Carboxy-8-hydroxy-2,7-dimethylnona-2,4-dienoyl)-.beta.-D-glucopyranose	4.679	6.716	6.123	level2			Tolcapone	12.946	19.875	1.663					19.9828	12.1792							N-Desmethylsildenafil	5e-05	-4.30103	80.1932	Benzyl 4-hydroxybenzoate	0.005	-2.30103	80.1932
3-(2-Hydroxy-4-methoxy-6-methylphenoxy)-5-methylpyrocatechol			6.875	level2	CAR 22:4	19.344	16.669		level2	Epitestosterone glucuronide	3.993	11.431	6.139	level2			Yohimbic Acid	20.071	17.351						23.336	12.19							Neotame	5e-05	-4.30103	80.3543	Bis[2-(perfluorohexyl)ethyl] phosphate	0.005	-2.30103	80.3543
Ethyl 3-(2,2,2-Trifluoroacetyl)benzoate			6.944	level2	Mifepristone	19.333	16.68		level2	7.alpha.,17.alpha.-Dimethyl-5.beta.-androstane-3.alpha.,17.beta.-diol glucuronide		13.636	6.161	level2			6-[(2,4-Dinitrophenyl)amino]hexanoic acid	8.583							24.0829	12.2057							Propyrisulfuron	5e-05	-4.30103	80.5153	Bisphenol AF	0.005	-2.30103	80.5153
NAE 4:0	4.9634		6.969	level2	FA 17:1	19.212	16.695		level2	Dihydroxy-Valerate	4.044	0.823	6.187	level2			Cetirizine		1.466						22.496	12.2273							Endosulfan sulfate	5e-05	-4.30103	80.6763	Bisphenol M	0.005	-2.30103	80.6763
N-(1,3-Benzothiazol-2-yl)-4-fluorobenzamide			6.983	level2	LPC 18:1	19.444	16.72		level2	6-Aminohexanamide	4.689		6.204	level2			1-(2,4-Difluorophenyl)-1H-pyrrole-2-carbaldehyde	5.005							22.37	12.2728							3-(4-Methylbenzylidene)camphor	0.0001	-4	80.8374	Bisphenol S	0.005	-2.30103	80.8374
N5-(1-Iminobutyl)-L-ornithine	4.854		7.006	level2	LPI 20:3	19.18	16.726		level2	OCP_295.0845_17.0	4.279	2.692	6.237	level2			Isosibiricin	16.233							23.579	12.2731							Acetamiprid	0.0001	-4	80.9984	Chloroxuron	0.005	-2.30103	80.9984
Ecgonine	4.759		7.104	level2	LPE 16:0	3.812	16.756		level2	PyroGlu-Val	7.684	3.734	6.24	level2			1H-Indazole-1-pentanoic acid, 3-[[[1-(aminocarbonyl)-2-methylpropyl]amino]carbonyl]-	12.106	7.141	1.357					22.14	12.2731							Aziprotryne	0.0001	-4	81.1594	Chromafenozide	0.005	-2.30103	81.1594
2-Methylpyrrolidine	4.717	22.962	7.137	level2	LPE 18:3	19.468	16.759		level2	2-(2-((Hexopyranosyloxy)methyl)-3-methylcyclopent-2-en-1-yl)-3-hydroxypropanoic acid	4.555	7.262	6.24	level2			1,2-Dihexanoyl-sn-glycerol	14.913							23.558	12.3886							Benzydamine	0.0001	-4	81.3205	Clodinafop	0.005	-2.30103	81.3205
BETAINE	4.871		7.151	level2	LPG 22:5	19.339	16.763	4.926	level2	(E)-8-(4-Hydroxy-6-methoxy-7-methyl-3-oxo-1H-2-benzofuran-5-yl)-2,6-dimethyloct-6-enoic acid			6.24	level2			Methanesulfonamide, N-[3-(9H-carbazol-9-yl)-2-hydroxypropyl]-N-(2-furanylmethyl)-			8.856					23.193	12.3886							Chloroxuron	0.0001	-4	81.4815	Clomeprop	0.005	-2.30103	81.4815
(3-Aminopropyl)(hydroxymethyl)phosphinic acid	4.89		7.199	level2	CAR 17:0	19.439	16.777	2.866	level2	2-[(2-Ethylbutanoyl)amino]-4,5-dimethoxybenzoic acid	4.276		6.248	level2			PFSA-perfluoroalkyl_branched_C3; C6HF13O3S	14.77	12.358						21.871	12.3934							Dodine	0.0001	-4	81.6425	Desmethyl Norflurazon	0.005	-2.30103	81.6425
D-3-Cyclohexylalanine	12.21		7.268	level2	2-(5-Oxovaleryl)phosphatidylcholine	19.511	16.782	4.958	level2	Dothiepin	4.276		6.248	level2			3-(2-Hydroxy-4-methoxy-6-methylphenoxy)-5-methylpyrocatechol			6.875					21.362	12.4032							Gabapentin	0.0001	-4	81.8035	Dichlorprop	0.005	-2.30103	81.8035
3-Hydroxybutyrylcarnitine	4.69685		7.518	level2	3-((Ethoxy(hydroxy)phosphoryl)oxy)-2-hydroxypropyl (9Z,12Z)-octadeca-9,12-dienoate	19.389	16.786		level2	DescladinoseAzithromycin	4.462	5.525	6.251	level2			(2E)-3-(4-Bromothiophen-2-yl)prop-2-enoic acid	9.124							23.511	12.414							Metribuzin	0.0001	-4	81.9646	Diflufenican	0.005	-2.30103	81.9646
Ethyl 4-(1-hydroxy-1-methylethyl)-2-propyl-1H-imidazole-5-carboxylate	6.398		7.583	level2	LPC 22:4	19.561	16.832		level2	N2-[2-(1H-Indol-3-yl)acetyl]-L-glutamine	3.9993	5.124	6.259	level2			N-Isobutyl-3-methylbutanamide	14.312							22.2145	12.4216							Monalide	0.0001	-4	82.1256	Dioxybenzone	0.005	-2.30103	82.1256
5,7-Dimethoxy-4'-hydroxyflavanone	4.89		7.636	level2	NATau 18:1	19.497	16.834		level2	1H-Imidazole-1-acetamide, N-[2-(cyclohexylamino)-1-(2-methylphenyl)-2-oxoethyl]-N-(3-fluorophenyl)-2-methyl-	12.833	9.929	6.273	level2			2-Propenoic acid, 3-(4-iodophenyl)-2-mercapto-, (2Z)-	9.132		10.118					20.7898	12.4513							Tebutam	0.0001	-4	82.2866	Diuron	0.005	-2.30103	82.2866
DEOXYCARNITINE	4.681		7.67	level2	5-[5-Hydroxy-3-(hydroxymethyl)pentyl]-8a-(hydroxymethyl)-5,6-dimethyl-3,4,4a,6,7,8-hexahydronaphthalene-1-carboxylic acid	19.403	16.848		level2	2-[7-Hydroxy-5-methoxy-3-oxo-6-[(2E,6Z)-3,7,11-trimethyldodeca-2,6,10-trienoxy]-1H-isoindol-2-yl]pentanedioic acid	12.916	12.236	6.278	level2			Undecanedioic acid	11.546	4.74	1.344					24.0132	12.5379							Aildenafil	0.0001	-4	82.4477	Ethiprole	0.005	-2.30103	82.4477
NAE 5:0	4.681		7.67	level2	LPE 22:4	20.333	16.855		level2	ALPHA-D-GLUCOSE	4.357		6.282	level2			Methapyrilene	8.05		8.988					24.0524	12.6126							Androstenedione	0.0001	-4	82.6087	Ethopabate	0.005	-2.30103	82.6087
Ethyl 3-amino-4-(methylsulfonyl)-5-(methylthio)thiophene-2-carboxylate	5.58		7.78	level2	Aspidocarpine	20.572	16.868		level2	2-[(1-Methyl-1H-pyrazolo[3,4-d]pyrimidin-4-yl)amino]ethanol	6.566	2.596	6.29	level2			Desoxymethasone	18.539							23.331	12.6174							Fenthion sulfone	0.0001	-4	82.7697	Ethylparaben	0.005	-2.30103	82.7697
L-Valine	5.981		7.803	level2	Methyl (1-(cyclohexylmethyl)-1H-indole-3-carbonyl)-L-valinate	20.572	16.868		level2	Lyso-sphingomyelin	17.984	15.502	6.316	level2			Ethyl 1-cyclopropyl-6,7-difluoro-8-methoxy-4-oxo-1,4-dihydroquinoline-3-carboxylate	7.127		8.076					23.9	12.638							Norethindrone	0.0001	-4	82.9308	Flubendiamide	0.005	-2.30103	82.9308
3-Amino-1,1,1-trifluoro-2-propanol	6.286		7.809	level2	FA 18:2	19.451	16.889	1.029	level2	Vaccinoside	4.29		6.371	level2			3-(Trifluoromethyl)cinnamic acid	6.204		8.882					23.236	12.6461							Simeconazole	0.0001	-4	83.0918	Flufenamic acid	0.005	-2.30103	83.0918
N-Fructosyl isoleucine	6.659		7.834	level2	NAE 16:2	19.63	16.899		level2	Naringenin-4'-O-.beta.-D-glucuronide	4.24	6.276	6.377	level2			1H-Indazole-3-carboxamide, N-[1-(aminocarbonyl)-2,2-dimethylpropyl]-1-(5-hydroxypentyl)-	12.31	8.491						22.5766	12.6753							Atenolol	0.0001	-4	83.2528	Flutolanil	0.005	-2.30103	83.2528
D-RIBOSE	6.142		7.875	level2	LPS 18:1	19.299	16.906		level2	4-(7-Hydroxy-4-oxo-3,4-dihydro-2H-chromen-2-yl)phenyl 2-O-(3,4-dihydroxy-4-(hydroxymethyl)tetrahydrofuran-2-yl)hexopyranoside	4.3		6.417	level2			9-Fluorenone	6.142		7.875					23.363	12.7462							Clethodim	0.0001	-4	83.4138	Genistein	0.005	-2.30103	83.4138
D-Ribose	6.142		7.875	level2	LPI 18:1	19.4672	16.906		level2	Fenetylline	4.263	6.432	6.436	level2			N-((2-Hydroxy-3-oxo-2-(pent-2-en-1-yl)cyclopentyl)acetyl)isoleucine	14.914	8.374						22.331	12.7933							Clodinafop	0.0001	-4	83.5749	Heptyl 4-hydroxybenzoate	0.005	-2.30103	83.5749
9-Fluorenone	6.142		7.875	level2	CAR 24:5	19.58	16.912		level2	Kaempferol	12.685		6.438	level2			LPA 12:0	17.936							23.7098	12.862							Clonazepam	0.0001	-4	83.7359	Irbesartan	0.005	-2.30103	83.7359
3-Aminopiperidine-2,6-dione	8.379		7.878	level2	MG 18:2	19.629	16.912		level2	3-(2-Hydroxyethyl)guanidine	4.592		6.45	level2			1-Phenyl-1,2,3,4-tetrahydroisoquinoline	4.726							23.8629	12.862							Codeine	0.0001	-4	83.8969	Lufenuron	0.005	-2.30103	83.8969
3-Ureidoisobutyric acid [M+H-H2O]+; AIF; CE0; CorrDec	8.913		7.878	level2	CAR 19:1	19.61	16.925	3.151	level2	Tuberonic acid glucoside	13.656	5.254	6.475	level2			[4-(2-Fluorobenzyl)piperazin-1-yl](2-fluorophenyl)methanone	4.896							23.673	12.862							Dioxybenzone	0.0001	-4	84.058	Mecoprop	0.005	-2.30103	84.058
Tris(hydroxymethyl)aminomethane	7.468		7.886	level2	FA 22:5	19.34	16.926	1.006	level2	Phenethyl rutinoside	3.975		6.486	level2			5-Benzyl-3-phenyl-2-thioxo-4-imidazolidinone	14.016							22.403	12.8869							Fleroxacin	0.0001	-4	84.219	Metaflumizone	0.005	-2.30103	84.219
L-Cysteine S-sulfate	6.968		8.003	level2	LPC 20:2	19.709	16.956		level2	5-Aminovaleric acid betaine	3.793		6.493	level2			N-Dodecanoyl-N-methylglycine		14.661						23.2601	12.8993							Hydroxyhomosildenafil	0.0001	-4	84.38	Methoxyfenozide	0.005	-2.30103	84.38
2-Methyl-3-oxo-5,6-diphenyl-2,3-dihydro-4-pyridazinecarboxylic acid			8.019	level2	PC 18:0	19.703	16.976		level2	6-[(Cyclohexylcarbamoyl)amino]hexanoic acid	4.395		6.499	level2			LPG O-13:1	17.174	15.415						24.0974	12.8993							Hydroxyprogesterone	0.0001	-4	84.5411	Naproanilide	0.005	-2.30103	84.5411
His-Trp	7.242	2.977	8.051	level2	LPG 18:1	19.468	16.981	5.382	level2	Methionine ethyl ester	4.366		6.549	level2			2,3-bis-(4-Hydroxyphenyl)propionitrile	4.24835		5.834					23.656	12.9448							Ketoprofen	0.0001	-4	84.7021	Neburon	0.005	-2.30103	84.7021
Monocrotaline N-oxide	7.242	2.977	8.051	level2	Fulvestrant 9-sulfone		16.982		level2	DL-Sulforaphane N-acetyl-L-cysteine	4.355	4.759	6.584	level2			2,7,8-Trimethyl-2-(.beta.-carboxyethyl)-6-hydroxychroman	12.543	10.639						24.0394	12.9524							Megestrol	0.0001	-4	84.8631	Niflumic Acid	0.005	-2.30103	84.8631
beta-Alanine; AIF; CE0; MS2Dec		0.772	8.053	level2	CAR 22:3	19.73	17.038		level2	Triethanolamine	4.658		6.599	level2			3-[(Ethylanilino)methyl]benzenesulfonic acid	7.669		8.598					23.417	12.9524							Mevinphos	0.0001	-4	85.0242	Nimodipine	0.005	-2.30103	85.0242
Ethyl 1-cyclopropyl-6,7-difluoro-8-methoxy-4-oxo-1,4-dihydroquinoline-3-carboxylate	7.127		8.076	level2	LPC O-16:1	19.8819	17.051		level2	4''-trans-Hydroxycilostazol	4.284	6.925	6.6	level2			1H-Indazole-1-pentanoic acid, 3-[[[1-(aminocarbonyl)-2,2-dimethylpropyl]amino]carbonyl]-	12.294	8.766	1.343					22.495	12.9594							Nifedipine	0.0001	-4	85.1852	Oryzalin	0.005	-2.30103	85.1852
4-(2-Thienyl)benzoic acid	6.747		8.091	level2	Incensole acetate	19.788	17.054	1.024	level2	tert-Butyl 4-(2-aminoethyl)-1-piperazinecarboxylate	4.52096		6.618	level2			[2-[4-Methyl-2-(2-methylpropanoyloxy)phenyl]oxiran-2-yl]methyl 2-methylpropanoate	15.757							22.4072	12.9778							Norharman	0.0001	-4	85.3462	Pentacosafluorotridecanoic acid	0.005	-2.30103	85.3462
N-epsilon-Formyl-L-lysine	7.371		8.213	level2	MG 20:3	19.9836	17.06		level2	(3E)-4-(1-Hydroxy-2,2,6-trimethyl-4-oxocyclohexyl)but-3-en-2-yl .beta.-D-glucopyranoside	4.244		6.66	level2			Polyporusterone A	20.487	17.738						24.03	13.0075							Orbifloxacin	0.0001	-4	85.5072	Perfluorodecanoic acid	0.005	-2.30103	85.5072
Diethyl 4-(4-fluorophenyl)-2,6-dimethyl-1,4-dihydropyridine-3,5-dicarboxylate	7.314	1.183	8.223	level2	13-cis-Retinol	19.7911	17.068		level2	Telmisartan	4.277	6.311	6.704	level2			1,6-Dioxacyclohexadecane-7,16-dione	15.426	12.743						23.485	13.0654							Promethazine	0.0001	-4	85.6683	Perfluorododecanoic acid	0.005	-2.30103	85.6683
N-Fructosyl tyrosine	7.31	1.195	8.223	level2	NAE 20:1	21.01	17.074	1.024	level2	Dihydrocaffeic_acid_3B_Glucuronide	4.47585	4.422	6.726	level2			cis-2-Decenoic acid	14.28	11.675						20.0448	13.086							Salbutamol	0.0001	-4	85.8293	Perfluoroundecanoic acid	0.005	-2.30103	85.8293
Voriconazole N-oxide	7.307		8.223	level2	LPC 19:1/0:0	19.997	17.075		level2	1,3,5-Trihydroxy-4-(((2E)-3-(3-hydroxy-4-methoxyphenyl)prop-2-enoyl)oxy)cyclohexanecarboxylic acid	4.475	5.407	6.734	level2			Piperine	15.217	12.594						21.871	13.1255							Sarafloxacin	0.0001	-4	85.9903	Propanil	0.005	-2.30103	85.9903
2-Chloro-4-phenylphenol	7.249		8.252	level2	n-Octadecylamine	19.737	17.079	2.665	level2	4-[3-(Trifluoromethyl)phenyl]-4-piperidinol	6.672		6.796	level2			FA 18:1;O3	14.379							23.182	13.1834							Triclabendazole	0.0001	-4	86.1514	Repaglinide	0.005	-2.30103	86.1514
N-Acetyl-L-carnosine	7.489		8.337	level2	2-Palmitoyl-rac-glycerol	18.9733	17.097		level2	Leukotriene D4 methyl ester	14.506	11.866	6.8	level2			(9Z)-5,8,11-Trihydroxyoctadec-9-enoic acid	13.474							22.21	13.31							Fenpyrazamine	0.0001	-4	86.3124	Sedaxane	0.005	-2.30103	86.3124
N-Acetyl-D-galactosaminitol	4.673		8.345	level2	LPC 17:0	19.497	17.117	5.552	level2	Kaempferol-3-Glucuronide	4.565	6.909	6.809	level2			(12Z)-9,10,11-Trihydroxyoctadec-12-enoic acid	14.022							22.342	13.31							Sulfoaildenafil	0.0001	-4	86.4734	Thidiazuron	0.005	-2.30103	86.4734
Pyroglutamic acid (not validated, isomer of 89)	7.656	1.057	8.542	level2	LPE 17:0	20.662	17.139		level2	(4E,6E)-8-(.beta.-D-Glucopyranosyloxy)-2,7-dimethylocta-4,6-dienoic acid	13.849	5.494	6.815	level2			1,10a-dihydroxy-4,4,7,11b-tetramethyl-1,2,3,4a,5,6,6a,7,11,11a-decahydronaphtho[2,1-f][1]benzofuran-9-one	14.042	13.114						24.05	13.4182							Thebaine	0.0001	-4	86.6345	Thifluzamide	0.005	-2.30103	86.6345
SN-GLYCERO-3-PHOSPHOCHOLINE	7.756		8.572	level2	1-Palmitoyl-2-azelaoylphosphatidylcholine	19.891	17.146		level2	3-(Benzoyloxy)-2-hydroxypropyl .beta.-D-glucopyranosiduronic acid	4.577	1.499	6.82	level2			1-Piperidinecarboxylic acid, 4-[[3-(4-pyridinyl)-1,2,4-oxadiazol-5-yl]methoxy]-, 1,1-dimethylethyl ester	13.771	10.915						22.625	13.5156							Alloxydim sodium	0.0001	-4	86.7955	Tolbutamide	0.005	-2.30103	86.7955
Citramalic acid	8.564		8.597	level2	11,14,17-Eicosatrienoic acid, (Z,Z,Z)-	19.15	17.16	1.012	level2	3-(4-(.beta.-D-Glucopyranosyloxy)-6-methoxy-1-benzofuran-5-yl)propanoic acid	4.534		6.821	level2			2-Decyl-3-hydroxypentanedioic acid	13.388	11.082						22.679	13.534							Midecamycin acetate	0.0001	-4	86.9565	Tolfenamic Acid	0.005	-2.30103	86.9565
3-[(Ethylanilino)methyl]benzenesulfonic acid	7.669		8.598	level2	LPC O-16:0	19.9326	17.167	5.531	level2	Guanidinobutyric acid methyl ester	4.455		6.856	level2			CAR 13:0	17.067	14.557	3.57					20.8798	13.6422							Pazufloxacin mesilate	0.0001	-4	87.1176	Triclabendazole	0.005	-2.30103	87.1176
Proline-hydroxyproline	7.652		8.618	level2	LPC O-18:2	19.942	17.186		level2	2-[(1,3-Thiazol-2-ylamino)carbonyl]cyclohexanecarboxylic acid	4.772		6.865	level2			N-(1,3-Benzothiazol-2-yl)-4-fluorobenzamide			6.983					23.807	13.7396							Triclocarban	0.0001	-4	87.2786	Triclosan	0.005	-2.30103	87.2786
2-(3-Carboxy-4-chlorophenyl)-1,3-dioxo-2,3-dihydro-1H-isoindole-5-carboxylic acid	8.776		8.624	level2	Hirsuteine	19.958	17.201		level2	N-ACETYLPUTRESCINE	4.689		6.875	level2			Biliverdin	20.6866	17.766						22.473	13.8662							3,5-Di-tert-butyl-4-hydroxybenzyl alcohol	0.0001	-4	87.4396	Endosulfan sulfate	0.005	-2.30103	87.4396
Phosalone	7.778		8.639	level2	PC 19:0	19.947	17.208		level2	7-[(3,3-Dimethyloxiran-2-yl)methoxy]-6-methoxychromen-2-one	6.98		6.976	level2			N-[2-(1H-Indol-3-yl)ethyl]propanamide	4.134		5.093					24.0163	14.0902							Perfluorobutanesulfonic acid	0.0001	-4	87.6006	Acetil acid	0.01	-2	87.6006
N-[3-(Dimethylamino)propyl]propanamide	7.87		8.672	level2	LPE O-18:2	19.976	17.212	5.643	level2	Glufosinate	4.846		7.016	level2			Hymeglusin	15.633	13.089						22.134	14.1984							Butylparaben	0.0001	-4	87.7617	Diclofenac Acid	0.01	-2	87.7617
ASPARAGINE	7.771		8.684	level2	Perindopril	19.946	17.234		level2	N-(1,3-Benzothiazol-2-yl)-4-fluorobenzamide	4.682		7.02	level2			1-(5-Chloro-2-hydroxyphenyl)-3-(2-furyl)-1,3-propanedione	4.984							22.785	14.4224							Diflunisal	0.0001	-4	87.9227	Ethoxyquin	0.01	-2	87.9227
Benzylacetate	7.87	0.697	8.722	level2	4-Imidazolidineheptanoic acid, 3-[(3R)-3-cyclohexyl-3-hydroxypropyl]-2,5-dioxo-, (4R)-rel-	20.393	17.234		level2	Alanine betaine	5.28		7.025	level2			Acetyl tributyl citrate	18.079	15.482						24.0271	14.6464							Fenoxanil	0.0001	-4	88.0837	Fenbufen	0.01	-2	88.0837
4-(Trifluoromethyl)benzylamine			8.737	level2	Ceratodictyol	19.98	17.241		level2	Ethyl 4-methyl-5-[(propan-2-yl)oxy]-9H-pyrido[3,4-b]indole-3-carboxylate	4.883		7.041	level2			Alpinetin	12.822							22.462	14.7546							Isobutyl 4-hydroxybenzoate	0.0001	-4	88.2448	Fenobucarb	0.01	-2	88.2448
4-AMINOBUTANOIC ACID	7.9	0.697	8.768	level2	CAR 20:1	19.956	17.251	2.73	level2	Bindarit	4.888		7.044	level2			4-(2-Thienyl)benzoic acid	6.747		8.091					23.787	14.9786							PFHxA	0.0001	-4	88.4058	Fenpyrazamine	0.01	-2	88.4058
N8-Acetylspermidine	7.956		8.768	level2	CAR 21:2	19.976	17.266	3.082	level2	6-Iodo-2-phenylimidazo[1,2-a]pyridine	4.77		7.044	level2			5,7-Dimethoxy-4'-hydroxyflavanone	4.89		7.636					12.139	-2.7978							Mono(2-ethyl-5-oxohexyl)phthalate	0.0001	-4	88.5668	Fluazuron	0.01	-2	88.5668
1-Piperazinecarboxamide, 4-(3-chloro-2-pyridinyl)-N-[4-(1,1-dimethylethyl)phenyl]-	7.915		8.773	level2	CAR 24:4	19.96	17.266		level2	8-oxo-Guo	4.505	4.758	7.09	level2			FA 20:4;O3	14.042	13.068														alpha-Zearalenol	0.0001	-4	88.7279	Foramsulfuron	0.01	-2	88.7279
Febuxostat	7.898		8.799	level2	LPC O-18:1	3.684	17.29		level2	3-hydroxy-C4-homoserine lactone	4.529		7.143	level2			L-Valine, N-[(1-pentyl-1H-indazol-3-yl)carbonyl]-, methyl ester	12.77															Chloroxuron	0.0001	-4	88.8889	Ganciclovir	0.01	-2	88.8889
DL-Ornithine	8.601	0.696	8.816	level2	Yohimbic Acid	19.587	17.316		level2	Diprotin B	4.609	3.193	7.146	level2			Primuletin	14.011	11.049														Dioxybenzone	0.0001	-4	89.0499	Josamycin	0.01	-2	89.0499
Methanesulfonamide, N-[3-(9H-carbazol-9-yl)-2-hydroxypropyl]-N-(2-furanylmethyl)-			8.856	level2	Palmitoleoyl Ethanolamide	18.956	17.325	1.076	level2	loganic acid	4.507		7.151	level2			3-Hydroxy-3',4'-Dimethoxyflavone	20.539															Ethylparaben	0.0001	-4	89.211	Noscapine	0.01	-2	89.211
3-(Trifluoromethyl)cinnamic acid	6.204	0.764	8.882	level2	LPG 18:0	20.318	17.392	5.5	level2	(2R)-3-Hydroxyisovaleroylcarnitine	4.71983		7.173	level2			Diethyl 4-(4-fluorophenyl)-2,6-dimethyl-1,4-dihydropyridine-3,5-dicarboxylate	7.314	1.183	8.223													Genistein	0.0001	-4	89.372	Propetamphos	0.01	-2	89.372
Myo-Inositol	7.728		8.882	level2	1-O-Hexadecyl-2-O-(2E-butenoyl)-sn-glyceryl-3-phosphocholine	20.324	17.398		level2	BETAINE	4.893		7.179	level2			CAR 14:1	17.233	14.578	3.614													Nimodipine	0.0001	-4	89.533	Pyridalyl	0.01	-2	89.533
1H-Indazole-3-carboxamide, N-[(1S)-1-(aminocarbonyl)-2-methylpropyl]-1-(5-chloropentyl)-	8.158		8.938	level2	LPC 20:1/0:0	20.324	17.398		level2	1-Amino-2-anthraquinonesulfonic acid	8.912		7.198	level2			2-Pentenedioic acid, 2-octyl-	12.086															Tolfenamic Acid	0.0001	-4	89.694	Ritodrine	0.01	-2	89.694
N-Acetylneuraminic acid	7.958		8.969	level2	CAR 22:2	20.166	17.433	2.685	level2	Prolinamide	5.546		7.228	level2			Phytosphingosine 1-phosphate	13.5518		2.758													Bromacil	0.0001	-4	89.8551	Sulfoaildenafil	0.01	-2	89.8551
Muramic acid	8.022		8.971	level2	FA 21:3	19.99	17.433		level2	5-(3,4-Dichloroanilino)-5-oxopentanoic acid	4.444	1.221	7.263	level2			Zeranol	12.456	8.671	2.127													Lenacil	0.0001	-4	90.0161	Thebaine	0.01	-2	90.0161
Methapyrilene	8.05		8.988	level2	LysoPC(0:0/18:0)	20.211	17.45	5.513	level2	4-Hydroxyhippuric acid sulfate	4.444	1.221	7.263	level2			LPE 13:0	17.579	15.279														Penoxsulam	0.0001	-4	90.1771	3,5-Di-tert-butyl-4-hydroxybenzyl alcohol	0.01	-2	90.1771
.gamma.-L-Glutamyl-L-alanine	8.143		9.049	level2	LPE 18:0	20.231	17.471	5.762	level2	D-Glucosamine-6-phosphate sodium salt	8.628	4.096	7.276	level2			3',4'-Dimethoxy-2'-hydroxychalcone	13.14	5.081														Bensulfuron methyl	0.0001	-4	90.3382	2,4,5-Trichlorophenoxyacetic acid	0.01	-2	90.3382
Pro-Leu-Lys	8.271		9.084	level2	LPC O-20:2		17.486		level2	Catechin(+)	4.657	7.981	7.277	level2			Octyl gallate	15.096	12.896														Bisphenol AP	0.0001	-4	90.4992	2-Hydroxy-4-methoxybenzophenone-5-sulfonic acid	0.01	-2	90.4992
NEPSILON,NEPSILON,NEPSILON-TRIMETHYLLYSINE	8.319		9.15	level2	PE 38:5|PE 18:1_20:4	21.832	17.493	1.509	level2	1H-Imidazole, 2-[(1-methylpropyl)dithio]-	4.669		7.277	level2			2-Propenamide, N-(4,5-dihydro-2-thiazolyl)-3-(4-ethylphenyl)-, (2E)-	14.015	11.049														Carprofen	0.0001	-4	90.6602	6-Benzylaminopurine	0.01	-2	90.6602
Propamocarb	8.319		9.15	level2	LPS 18:0	20.241	17.493		level2	DL-TMAP	6.251		7.287	level2			5,7-Dimethoxyflavanone	13.127	9.415														Gliclazide	0.0001	-4	90.8213	Bromacil	0.01	-2	90.8213
Val-Arg	8.259		9.16	level2	LPA 18:2	19.8732	17.511		level2	N-(2-Chlorobenzyl)-7H-purin-6-amine	4.66458		7.293	level2			2-[(2-Ethylbutanoyl)amino]-4,5-dimethoxybenzoic acid	4.284	3.591	6.236													Salmeterol	0.0001	-4	90.9823	Chlorantraniliprole	0.01	-2	90.9823
His-Ala	8.336		9.249	level2	FA 19:1	20.146	17.54		level2	1,5-ANHYDRO-GLUCITOL	4.055	0.863	7.302	level2			1,11-Undecanedicarboxylic acid	12.304	8.161	1.316													Buformin hydrochloride	0.0005	-3.30103	91.1433	Cyantraniliprole	0.01	-2	91.1433
DL-Ethionine	4.631		9.267	level2	Neogrifolin	20.369	17.567		level2	N-Acetyl-D-glucosamine	4.907		7.306	level2			4-Pregnen-17.alpha., 20.beta.-diol-3-one-20-sulfate	13.178	10.975	1.4													Isonoruron	0.0005	-3.30103	91.3043	Cyclamic acid	0.01	-2	91.3043
2-Amino-5,5,5-trifluoropentanoic acid	8.368		9.267	level2	LPE 20:1	21.241	17.571		level2	O-acetyl serine betaine	6.66		7.312	level2			Idebenone	16.006															Testosterone	0.0005	-3.30103	91.4654	Diclofenac acid	0.01	-2	91.4654
S-Methyl-methionine; LC-tDDA; CE10	8.44		9.267	level2	NAE 20:4	20.21	17.581	1.065	level2	Ketologanic acid	4.636	3.054	7.321	level2			N-Benzyl-6-fluoro-1,3-benzothiazol-2-amine	8.738		9.645													Hydroxyprogesterone caproate	0.0005	-3.30103	91.6264	Dimefuron	0.01	-2	91.6264
Glu-Ser	8.885		9.303	level2	Diethyl 5,5'-methylenebis(4-ethyl-3-methyl-1H-pyrrole-2-carboxylate)	20.367	17.596		level2	Phe-Thr	6.809		7.351	level2			2,4-Thiazolidinedione, 5-[[4-[2-[5-(1-hydroxyethyl)-2-pyridinyl]ethoxy]phenyl]methyl]-	12.623	7.825														Metformin	0.0005	-3.30103	91.7874	Estrone	0.01	-2	91.7874
Glu-Gly	8.443		9.337	level2	1-(1Z-Octadecenyl)-sn-glycero-3-phosphocholine	20.487	17.704		level2	N-Cyclopropyl-2-(1-piperazinyl)acetamide	6.021		7.375	level2			5-Androsten-3.beta.,17.beta.-diol-3-sulfate	14.149	12.759														Testosterone propionate	0.0005	-3.30103	91.9485	Fenoprop	0.01	-2	91.9485
Arg-Pro	8.529		9.4	level2	3-(Hexadecyloxy)-1,2-propanediol	20.486	17.726		level2	4-(2-Oxo-2,3-dihydro-1H-benzimidazol-1-yl)butanoic acid			7.419	level2			4-Imidazolidineheptanoic acid, 3-[(3R)-3-cyclohexyl-3-hydroxypropyl]-2,5-dioxo-, (4R)-rel-	19.966	17.271														Benzophenone	0.0005	-3.30103	92.1095	Flubendazole	0.01	-2	92.1095
Ureidoglutaric acid	8.508		9.406	level2	Bilirubin; LC-tDDA; CE40	20.536	17.733	1.021	level2	Orotic acid	4.911		7.424	level2			LPC 16:3/0:0		15.56														4,4'-Methylenebis(2-chloroaniline)	0.0005	-3.30103	92.2705	Glibornuride	0.01	-2	92.2705
.alpha.-Asp-Gly	8.543		9.432	level2	LPE O-18:1	20.51	17.733	5.512	level2	N-Acetyl-D-galactosaminitol	4.661	0.865	7.428	level2			1-(4-Fluorophenyl)-3-(5-phenyl-1,3,4-oxadiazol-2-yl)urea	8.597		9.466													Butyl methoxydibenzoylmethane	0.0005	-3.30103	92.4316	Lenacil	0.01	-2	92.4316
His-Gly	8.521		9.443	level2	CAR 20:0	20.482	17.751		level2	7-Methylguanosine	4.18	2.59	7.436	level2			5.alpha.-Pregnan-3.alpha.,17-diol-20-one 3-sulfate	13.866	12.009	2.268													Gatifloxacin	0.0005	-3.30103	92.5926	Penoxsulam	0.01	-2	92.5926
Glu-Gln	8.585	0.696	9.458	level2	CAR 21:1		17.755		level2	Myoseverin	6.54107	8.039	7.448	level2			CAR 16:3	17.213	14.691														Sulfasalazine	0.0005	-3.30103	92.7536	Perfluorotetradecanoic acid	0.01	-2	92.7536
gamma-Glutamylglutamine	8.589		9.458	level2	NAE 20:3	20.572	17.784	1.065	level2	Pro-Thr	4.56	1.17	7.469	level2			Clopidogrel carboxylic acid	12.527	7.402	2.836													Fenbufen	0.0005	-3.30103	92.9147	Tolfenpyrad	0.01	-2	92.9147
Fenoxaprop	8.56		9.458	level2	FA 22:3	20.368	17.789		level2	DL-threo-beta-Methylaspartic acid	4.477		7.499	level2			Ethanone, 1-[5-ethyl-2-hydroxy-4-[[6-methyl-6-(2H-tetrazol-5-yl)heptyl]oxy]phenyl]-	13.388	8.027	1.689													3,5-Dichloroaniline	0.0005	-3.30103	93.0757	Bisphenol C	0.01	-2	93.0757
1-(4-Fluorophenyl)-3-(5-phenyl-1,3,4-oxadiazol-2-yl)urea	8.597	0.793	9.466	level2	LPC O-18:0	20.595	17.8		level2	3-Hydroxybutyrylcarnitine	4.745		7.545	level2			Diethyl (4-fluorobenzyl)phosphonate	13.381															4,4'-Dichlorobenzophenone	0.0005	-3.30103	93.2367	Isocarbophos	0.01	-2	93.2367
2-(4-Bromophenyl)-8-methyl-4-quinolinecarboxylic acid	8.794		9.466	level2	Oleoyl ethylamide	20.588	17.805		level2	Glu-Pro	7.837		7.569	level2			9-(Benzylamino)-1,2,3,4-tetrahydroacridin-1-ol	17.191	14.628														Azithromycin	0.0005	-3.30103	93.3977	3,5-Dichloroaniline	0.05	-1.30103	93.3977
His-Glu	8.614		9.484	level2	Cer 27:2;O3|Cer 12:1;O2/15:1;O		17.809		level2	3-Cysteinylacetaminophen	6.449		7.59	level2			3-Dehydrocholic acid	15.343	13.307														Ciprofloxacin	0.0005	-3.30103	93.5588	4,4'-Dichlorobenzophenone	0.05	-1.30103	93.5588
2,5-Dichlorolichexanthone	8.661		9.553	level2	LPA 20:4	20.501	17.809		level2	Serine betaine	6.16		7.625	level2			Hexaconazole	7.634															Cloransulam-methyl	0.0005	-3.30103	93.7198	Alloxydim sodium	0.05	-1.30103	93.7198
N-Benzyl-6-fluoro-1,3-benzothiazol-2-amine	8.738		9.645	level2	2-Arachidonyl glycerol ether	20.605	17.819		level2	Acetaminophen-glucuronide; LC-tDDA; CE10	6.473	1.694	7.628	level2			15-Ketoprostaglandin E1	16.972															N4-phthalylsulfathiazole	0.0005	-3.30103	93.8808	Azithromycin	0.05	-1.30103	93.8808
Glu-Arg	8.774		9.658	level2	Docosahexaenoic acid methyl ester	20.5495	17.819		level2	PharmaGSID_48507		5.245	7.778	level2			Dehydroisoandrosterone sulfate	13.872	11.682														Thiabendazole	0.0005	-3.30103	94.0419	Ciprofloxacin	0.05	-1.30103	94.0419
Glu-His	8.614		9.661	level2	CAR 22:1	20.5446	17.82		level2	Val-Val	5.564		7.799	level2			1-Naphthalenepentanoic acid, 5-carboxy-1,2,3,4,4a,7,8,8a-octahydro-7-hydroxy-.beta.,1,2,4a-tetramethyl-	15.321	13.068														Fumonisin b1	0.0005	-3.30103	94.2029	clinafoxacin,HCl	0.05	-1.30103	94.2029
.gamma.-Glu-.epsilon.-Lys	8.762		9.677	level2	Epi(13)Torulosol	19.15	17.847		level2	Adipoyl-L-carnitine	4.688	2.697	7.812	level2			2-Chloro-4-phenylphenol	7.249		8.252													Triadimenol	0.0005	-3.30103	94.3639	Cloransulam-methyl	0.05	-1.30103	94.3639
Glu-Lys	8.762		9.694	level2	Tridemorph	20.645	17.862	0.984	level2	O-t-Butyl-L-serine, methyl ester	4.577		7.816	level2			Febuxostat	7.898		8.799													perfluoro-n-pentanoic acid-1 (PFPeA)	0.0005	-3.30103	94.525	Midecamycin acetate	0.05	-1.30103	94.525
E-N-Deoxyfructosyllysine	8.854		9.787	level2	7.alpha.-Hydroxy-4-cholesten-3-one	20.6494	17.862		level2	Pro-Val	6.215	3.833	7.819	level2			FA 18:1;O2		16.167														2,4-Dichlorophenoxyacetic acid	0.0005	-3.30103	94.686	N4-phthalylsulfathiazole	0.05	-1.30103	94.686
Ethylenediaminetetraacetic acid	8.836	0.689	9.923	level2	Bis(2-ethylhexyl) adipate	20.654	17.869		level2	Dimethylglycine	5.979		7.819	level2			Neopentyl glycol dibenzoate	14.203															Mecoprop	0.0005	-3.30103	94.847	Norfloxacin	0.05	-1.30103	94.847
Methylenediphosphonic acid	9.133		10.106	level2	1-Hexadecyl lysophosphatidic acid	20.669	17.89		level2	Val-Pro	5.014		7.819	level2			Laurylsulfuric acid	17.64	15.111														Triclosan	0.0005	-3.30103	95.0081	Pazufloxacin mesilate	0.05	-1.30103	95.0081
2-Propenoic acid, 3-(4-iodophenyl)-2-mercapto-, (2Z)-	9.132		10.118	level2	2Z-Eicosenoic acid	20.528	17.893		level2	(Diethylamino)(oxo)acetic acid	6.094		7.834	level2			1-Pyrrolidineheptanoic acid, 2-(3-hydroxyoctyl)-5-oxo-	15.71	13.594	3.331													2,4,5-Trichlorophenoxyacetic acid	0.0005	-3.30103	95.1691	Pipemidic acid	0.05	-1.30103	95.1691
D-(+)-Malic acid	4.753	0.647		level2	FA 26:6	20.479	17.899		level2	3-Amino-1,1,1-trifluoro-2-propanol	6.286		7.834	level2			1H-Indazole-3-carboxamide, N-[(1S)-1-(aminocarbonyl)-2-methylpropyl]-1-(5-chloropentyl)-	8.158		8.938													2-Hydroxy-4-methoxybenzophenone-5-sulfonic acid	0.0005	-3.30103	95.3301	Propamocarb	0.05	-1.30103	95.3301
GLYCERIC ACID	4.8	0.71		level2	.omega.-3 Arachidonic acid methyl ester	20.7724	17.904		level2	(2S,3S)-3-Hydroxyleucine	6.16		7.834	level2			LPC 15:2	3.805															Diclofenac acid	0.0005	-3.30103	95.4911	Sulfentrazone	0.05	-1.30103	95.4911
LACTIC ACID	3.79	0.757		level2	bilobol	20.685	17.904		level2	1-[(4-Fluorophenyl)sulfonyl]piperazine	6.089		7.839	level2			FA 14:0(2OH)	16.843	14.425														Dimefuron	0.0005	-3.30103	95.6522	Thiabendazole	0.05	-1.30103	95.6522
NG,NG-Dimethyl-L-arginine	8.038	0.793		level2	CAR 24:2	20.6822	17.963		level2	(1-Methyl-1H-imidazol-4-yl)acetic acid	4.978		7.849	level2			FA 14:0;O	17.428	14.425														Fenoprop	0.0005	-3.30103	95.8132	Triclocarban	0.05	-1.30103	95.8132
Piperidine	3.886	0.994		level2	Pipericine	20.776	17.975	1.065	level2	2,4-DIHYDROXYBUTANOIC ACID	4.441	0.784	7.872	level2			C12-AE1S (TENTATIVE)	18.2	15.658														Bis(4-hydroxyphenyl)methane	0.0005	-3.30103	95.9742	Validamycin	0.05	-1.30103	95.9742
Trifluoromethanesulfonic acid		1.261		level2	5-[(2Z,8Z)-Pentadeca-2,8-dienyl]benzene-1,3-diol	20.771	17.975		level2	ARABINOSE	6.104		7.872	level2			Heptadecasphinganine	16.091															Dibutyl phosphate	0.0005	-3.30103	96.1353	Bensulfuron methyl	0.05	-1.30103	96.1353
Niacinamide		1.268		level2	FA 24:4	20.596	17.977		level2	Lincomycin A	7.269		7.873	level2			cis-5-Dodecenoic acid	16.017															Diethyl phosphate	0.0005	-3.30103	96.2963	Bis(4-hydroxyphenyl)methane	0.05	-1.30103	96.2963
2-Methyl-4-nitroaniline		1.44		level2	LPE O-16:1	20.6475	17.984	5.672	level2	N-(tert-Butyl)-2-piperidinecarboxamide	7.13		7.883	level2			FA 16:1;O3	14.022		1.4													MCPB	0.0005	-3.30103	96.4573	Bisphenol AP	0.05	-1.30103	96.4573
Cetirizine		1.466		level2	Echinenone		18.015		level2	Diflubenzuron	4.998		7.886	level2			CAR 16:2	17.613	15.089														Blasticidine S	0.001	-3	96.6184	Carprofen	0.05	-1.30103	96.6184
Pantothenic acid	10.36	1.748		level2	1-Oleoyl-L-.alpha.-lysophosphatidic acid	20.501	18.02		level2	Tris(hydroxymethyl)aminomethane	6.688		7.895	level2			5.beta.-Androstan-3.alpha.-ol-17-one sulfate	14.715	12.028	1.4													Diphenylamine	0.001	-3	96.7794	Chlorimuron-ethyl	0.05	-1.30103	96.7794
4-Hydroxyhippuric acid	3.84	1.912		level2	LPC 20:0/0:0	20.832	18.029	5.472	level2	DL-Leu-DL-Val	5.845		7.899	level2			LPC 14:0	18.174	15.56	5.614													Danofloxacin	0.001	-3	96.9404	Dibutyl phosphate	0.05	-1.30103	96.9404
Acesulfame		2.022		level2	NAE 21:3	20.688	18.029		level2	(5Z)-5-(2-Hydroxybenzylidene)-1,3-thiazolidine-2,4-dione	6.395		7.904	level2			3,5-Di-tert-butyl-2-hydroxybenzaldehyde	16.483	13.909														Dinitramine	0.001	-3	97.1014	Diethyl phosphate	0.05	-1.30103	97.1014
Benzoic acid		2.305		level2	LPE 20:2	20.687	18.106		level2	4-Imidazoleacetic acid	5.798		7.908	level2			Carbamazepine	12.765															Moxifloxacin	0.001	-3	97.2625	Gliclazide	0.05	-1.30103	97.2625
3-Hydroxy-2-methyl-4-pyrone sulfate	4.72	2.372		level2	Arachidonic acid ethyl ester	20.922	18.115		level2	3-Aminopiperidine-2,6-dione	4.989		7.911	level2			Perfluoroheptanoic acid	14.675	12.248														Nitrendipine	0.001	-3	97.4235	Glimepiride	0.05	-1.30103	97.4235
Gibberellin A4	6.33813	2.712		level2	7,7-Dimethyl-(5Z,8Z)-eicosadienoic acid	20.787	18.127		level2	Mesaconic acid	3.956	0.653	7.929	level2			2-[4-(4-Chlorobenzoyl)phenoxy]-2-methylpropanoic acid	14.397	13.154	1.3													Voglibose	0.001	-3	97.5845	Glyburide	0.05	-1.30103	97.5845
N-Fructosyl phenylalanine	6.41711	2.784		level2	FA 22:2	20.787	18.127		level2	2-KETO-3-DEOXY-D-GLUCONIC ACID			7.934	level2			Tafluprost (free acid)	12.473	9.239	1.328													Propetamphos	0.001	-3	97.7456	Halosulfuron-methyl	0.05	-1.30103	97.7456
3-(2-Pyrimidinyl)propanoic acid		2.918		level2	PE 36:3|PE 18:1_18:2	23.181	18.146	4.845	level2	CITRAMALIC ACID	4.271		7.944	level2			9S,11R,15S-Trihydroxy-20a,20b-dihomo-5Z,13E-prostadienoic acid	20.908	17.931														clinafoxacin,HCl	0.001	-3	97.9066	Hydroxyhomosildenafil	0.05	-1.30103	97.9066
DEHYDROACETIC ACID	11.21	3.071		level2	FA 21:1	20.92	18.213		level2	N,N'-Dicarbobenzyloxy-L-ornithine	7.28		7.977	level2			(9Z,12E)-15,16-Dihydroxyoctadeca-9,12-dienoic acid	14.42	12.971														Propamocarb	0.001	-3	98.0676	MCPB	0.05	-1.30103	98.0676
Isobutyryl-carnitine; LC-tDDA; CE10	4.01	3.15		level2	FA 26:5	20.883	18.227		level2	Isoleucylglutamate	7.857	4.146	7.978	level2			FA 17:0;O2	19.541															MQCA	0.001	-3	98.2287	N-Desmethylsildenafil	0.05	-1.30103	98.2287
4-Acetamidophenol sulfate		3.185		level2	CAR 22:0	21.021	18.239	3.056	level2	Cysteine-S-sulfate; LC-tDDA; CE10	6.953		8.016	level2			N-3-Oxotetradec-7Z-enoyl-L-homoserine lactone	19.883	14.671														(4-Chloro-2-methylphenoxy)acetic acid	0.001	-3	98.3897	Neotame	0.05	-1.30103	98.3897
Tetraethylene glycol	10.4327	3.25		level2	FA 20:0;O4	21.133	18.27		level2	3-Methyluridine	6.718	0.853	8.017	level2			FA 20:5;O2	19.174	16.787														Perfluorononanesulfonic acid sodium	0.001	-3	98.5507	Perfluorononanesulfonic acid sodium	0.05	-1.30103	98.5507
4-Formylaminoantipyrine		3.372		level2	Batyl alcohol	21.092	18.282		level2	Methanone, [1-(4-hydroxypentyl)-1H-indol-3-yl](4-methyl-1-naphthalenyl)-	7.01		8.042	level2			LPC 15:1/0:0	3.774															Fluconazole	0.001	-3	98.7118	Propyrisulfuron	0.05	-1.30103	98.7118
N1-(2,4-Dinitrophenyl)ethane-1,2-diamine		3.444		level2	CAR 24:1	21.09	18.288		level2	1-Phenylbiguanide	6.971		8.072	level2			Chamazulene	11.883	4.739														3,4,5-Trimethylphenyl methylcarbamate	0.005	-2.30103	98.8728	Salmeterol	0.05	-1.30103	98.8728
Phenol sulfate		3.583		level2	cis-5,8,11-Eicosatrienoic acid	19.672	18.299		level2	Sarcosine	7.09		8.072	level2			MG 16:0		17.271														Ethyl 4-dimethylaminobenzoate	0.005	-2.30103	99.0338	Triasulfuron	0.05	-1.30103	99.0338
O-HYDROXYHIPPURIC ACID	3.84	4.312		level2	LPC O-20:0		18.32		level2	Encenicline	6.877		8.075	level2			2,4-Di-tert-butylphenol	18.608															Chlormequat chloride	0.005	-2.30103	99.1948	Triflusulfuron	0.05	-1.30103	99.1948
5-Hydroxyvalproic acid		4.417		level2	FA 24:3	21.068	18.341		level2	Myo-Inositol	7.749	0.79	8.097	level2			5-Tetradecynoic acid	16.855	14.543														Isopropalin	0.005	-2.30103	99.3559	Aminocyclopyrachlor	0.1	-1	99.3559
Cyclamate	3.67	4.48		level2	LPC O-22:1	21.223	18.375		level2	Glu-Phe	7.394	4.599	8.141	level2			Benzyl-butyl-phthalate	17.136	14.586														Ethoxyquin	0.005	-2.30103	99.5169	Flonicamid	0.1	-1	99.5169
2,6-Dihydroxybenzoic acid		4.658		level2	FA 20:0	21.203	18.405		level2	Alliin	4.658		8.164	level2			CAR 16:1	18.298	15.74	3.464													Norfloxacin	0.005	-2.30103	99.6779	Iminoctadinetris	0.5	-0.30103	99.6779
Chamazulene	11.883	4.739		level2	Vaccenic acid	19.638	18.463	1.027	level2	Gln-Pro	7.252		8.173	level2			Diethyl 5,5'-methylenebis(4-ethyl-3-methyl-1H-pyrrole-2-carboxylate)	20.368															Pipemidic acid	0.005	-2.30103	99.839	Fluconazole	0.5	-0.30103	99.839
NCGC00381364-01!3-propan-2-yl-2,3,6,7,8,8a-hexahydropyrrolo[1,2-a]pyrazine-1,4-dione	4.42	4.77		level2	FA 18:1	19.638	18.463	1.027	level2	Ac-Asp-Glu	6.736	0.638	8.174	level2			9-Oxo-11.alpha.,16R-dihydroxy-17-cyclobutyl-5Z,13E-dien-1-oic acid	19.18	16.494														Iminoctadinetris	0.005	-2.30103	100	Fumonisin b1	1	0	100
1,3,8-Trimethyl-3,9-dihydro-1H-purine-2,6-dione		4.842		level2	(Z)-6-Octadecenoic acid	19.638	18.463		level2	5-Amino-3-isoxazolol	7.281		8.177	level2			[6]-Shogaol	16.537
2-Methoxyphenol sulfate		4.965		level2	Vitamin E (Alpha-Tocopherol)	23.749	18.469		level2	N-epsilon-Formyl-L-lysine	7.382		8.237	level2			D-erythro-Sphingosine-1-phosphate	4.454	16.046	6.323
3',4'-Dimethoxy-2'-hydroxychalcone	13.14	5.081		level2	LPC O-24:2	21.371	18.485		level2	PyroGlu-Val-Lys	7.203		8.258	level2			Cyclohexyl(phenyl)[3-(piperidin-1-yl)propyl]silanol	13.5	10.463	5.379
(E)-2-Phenylethenesulfonic acid		5.274		level2	FA 26:4	21.291	18.511		level2	3-(.beta.-D-Glucopyranosyloxy)-2-methylbutanenitrile	6.44202		8.258	level2			9,10-Dihydroxy-12Z-octadecenoic acid	18.639	13.54
(4-Methylphenyl)oxidanesulfonic acid	12.07	5.59		level2	PE O-38:7|PE O-16:1_22:6	22.445	18.521	4.698	level2	Sulfoacetic acid	5.281	0.684	8.307	level2			LPE 15:0	19.748	17.157
Pro-Thr-Lys	4.85571	5.837		level2	LPC 24:1/0:0	21.432	18.54		level2	3-Aminopyridine	7.221		8.31	level2			LPA 15:0	19.977	17.535
Vanillin-4-sulfate		5.967		level2	NAE 26:2		18.546		level2	Buprofezin	7.549		8.352	level2			Fenoxaprop	8.56		9.458
N,N'-(Ethylenedioxy)diphthalimide		6.067		level2	BMP 36:4|BMP 18:2_18:2	21.6038	18.564		level2	1H-Indole-1-pentanoic acid, 3-[(4-ethyl-1-naphthalenyl)carbonyl]-	7.415		8.362	level2			Valsartan	14.919	10.245	1.329
N-(2-Pyridinyl)-2-(1,3,5-trimethyl-1H-pyrazol-4-yl)acetamide	12.977	6.438		level2	LPA 20:3	21.472	18.576		level2	2-Oxo-5-(3,3-dimethylguanidine-1-yl)pentanoic acid	8.128		8.365	level2			LPC 15:0/0:0	18.971	16.314	5.607
FA 9:0+1O	12.369	6.456		level2	LPA 18:0	21.472	18.576		level2	N-Acetyl-L-carnosine	7.489	1.286	8.372	level2			FA 19:2;O2	16.688	12.79
Dimethyl suberate	13.642	6.861		level2	FA 24:1(2OH)	21.62	18.576		level2	Daphnin	6.88		8.372	level2			Phosalone	7.778		8.639
6-[3-(Trifluoromethyl)anilino]-3-pyridinesulfonamide	12.418	6.861		level2	25-Hydroxycholesterol	21.451	18.588		level2	ESCULIN	6.88		8.372	level2			taurohyodeoxycholic acid	16.582	14.812
5-(2-Methyl-4-nitrophenyl)-2-furoic acid		7.334		level2	ST 27:1;O;S	21.829	18.59	1.268	level2	2-METHYLCITRATE	6.258		8.389	level2			LPE 16:1	19.467	17.198
2H-Pyran-2-one, tetrahydro-4-hydroxy-6-pentyl-	13.131	7.689		level2	CAR 24:0	21.548	18.649	2.973	level2	Dinitramine	7.374		8.4	level2			Bufalin	15.464	12.89
Ala-Tyr	12.674	7.83		level2	ST 29:2;O;S	21.82	18.661	1.084	level2	D(-)-Gulono-gamma-lactone	7.306		8.428	level2			LPA 16:1	3.739	17.326	5.744
Daidzein 4'-sulfate		7.898		level2	SM 32:2;O2|SM 18:2;O2/14:0	21.6	18.671		level2	Adenosine 2'-monophosphate	7.92		8.456	level2			17alpha-Methyltestosterone	20.066
6-hydroxynaphthalene-2-sulfonate	12.547	7.959		level2	CAR 26:1	21.58	18.68		level2	Pro-Glu	7.723		8.457	level2			3-Dodecyloxypropylamine	16.64	14.189
Methyl hydrogen azelate	12.912	8.096		level2	FA 24:2	21.538	18.683		level2	Dicumarol	7.61		8.474	level2			LPC O-14:0	19.01	16.352
2-(Ethylsulfonyl)benzoic acid	12.723	8.21		level2	BMP 40:7|BMP 18:1_22:6	21.76	18.687		level2	3-[(Ethylanilino)methyl]benzenesulfonic acid	6.964		8.477	level2			9-Oxo-11-(3-pentyl-2-oxiranyl)-10E-undecenoic acid	13.84	11.582
Triethylene glycol methyl ether methacrylate	12.827	8.331		level2	FA 20:2	20.031	18.697		level2	D-(+)-Trehalose	7.442	0.861	8.489	level2			2,5-Dichlorolichexanthone	8.661		9.553
N-((2-Hydroxy-3-oxo-2-(pent-2-en-1-yl)cyclopentyl)acetyl)isoleucine	14.914	8.374		level2	Docosanamide	21.694	18.723		level2	Melibiose	7.875		8.489	level2			(3S)-3-(2-methylpyrimidin-5-yl)-9-(5,6,7,8-tetrahydro-1,8-naphthyridin-2-yl)nonanoic acid	15.747
INDOLEPROPIONIC ACID	11.938	8.4		level2	ST 28:1;O;S	22.097	18.747		level2	Pyrazosulfuron-ethyl	7.689		8.539	level2			LPC 17:3	19.5	17.508
Dimethyl azelate	12.912	8.458		level2	LPC O-22:0	21.734	18.749	5.493	level2	Pro-Asp	7.697		8.56	level2			ST 24:1;O4;S	13.525	11.515	2.849
(2R)-2-[(2R,5S)-5-[(2S)-2-hydroxybutyl]oxolan-2-yl]propanoic acid	12.912	8.458		level2	BMP 36:3|BMP 18:1_18:2	21.8684	18.754		level2	SN-GLYCERO-3-PHOSPHOCHOLINE	7.744		8.598	level2			Phencyclidine	14.538
1H-Indazole-3-carboxamide, N-[1-(aminocarbonyl)-2,2-dimethylpropyl]-1-(5-hydroxypentyl)-	12.31	8.491		level2	FA 23:1	21.705	18.769		level2	2,2`,4,4`-Tetrahydroxybenzophenone	7.681		8.631	level2			CAR 18:3	18.111	15.529	3.462
5,7-Dimethoxyflavanone	13.127	9.415		level2	SM 31:1;O2	21.7708	18.783	5.371	level2	Proline-hydroxyproline	7.684	0.858	8.635	level2			(6E,10Z,14E)-6,14-Dimethyl-3-methylidene-2-oxo-3a,4,5,8,9,12,13,15a-octahydrocyclotetradeca[b]furan-10-carboxylic acid	13.7	11.914
(S)-(-)-Perillic acid	13.082	9.548		level2	LPC O-24:1	21.798	18.783	5.459	level2	L-Homocitrulline	7.756		8.636	level2			MG 18:2		16.947
Sebacic acid monomethyl ester	13.374	9.857		level2	PE 38:5|PE 16:0_22:5	23.03	18.795		level2	6-Methyl-2-[(2-oxo-2-phenylethyl)sulfanyl]-4(3H)-pyrimidinone	7.734		8.657	level2			LPC 16:1/0:0	18.754	15.857	5.496
[(2S,3R,4S,5S,6R)-3,4,5-trihydroxy-6-(hydroxymethyl)oxan-2-yl] (2E,6E)-8-hydroxy-2,6-dimethylocta-2,6-dienoate	13.357	10.173		level2	PE P-36:4|PE P-16:0_20:4	23.285	18.817	4.712	level2	Ethyl 4-amino-1-piperidinecarboxylate	7.74		8.679	level2			1-Piperazinecarboxamide, 4-(3-chloro-2-pyridinyl)-N-[4-(1,1-dimethylethyl)phenyl]-	7.915		8.773
2,7,8-Trimethyl-2-(.beta.-carboxyethyl)-6-hydroxychroman	12.543	10.639		level2	SM 33:2;O2		18.857		level2	Asp-Val	7.772		8.685	level2			Buprenorphine	18.433	15.814	5.614
3-(5,6-Dihydroxyheptyl)-4-methyl-2H-furan-5-one	14.017	10.855		level2	LPC O-26:2		18.864		level2	Glu-Leu	7.857	5.398	8.723	level2			(3.beta.)-Allopregnanolone sulfate	14.643	12.841
1-Piperidinecarboxylic acid, 4-[[3-(4-pyridinyl)-1,2,4-oxadiazol-5-yl]methoxy]-, 1,1-dimethylethyl ester	13.771	10.915		level2	LPC 24:0/0:0	22.0054	18.871		level2	D-Asparagine	7.783		8.731	level2			glycohyodeoxycholic acid	16.633	14.657	4.914
Primuletin	14.011	11.049		level2	LPA 21:3	21.966	18.897		level2	Benzylacetate	7.864		8.743	level2			Perfluorooctanoic acid (PFOA)	15.617	13.041
2-Propenamide, N-(4,5-dihydro-2-thiazolyl)-3-(4-ethylphenyl)-, (2E)-	14.015	11.049		level2	LPA 19:0	21.966	18.897		level2	Asp-Tyr	7.937		8.763	level2			(4E,8E)-10-(4-hydroxy-6-methoxy-7-methyl-3-oxo-1H-2-benzofuran-5-yl)-4,8-dimethyldeca-4,8-dienoic acid	13.34	11.178
2-Decyl-3-hydroxypentanedioic acid	13.388	11.082		level2	PI 32:1		18.902	5.939	level2	Glucoheptonic acid	7.767		8.889	level2			NAE 18:4	19.58	16.881
Azasetron	14.0707	11.174		level2	PC 32:0|PC 16:0_16:0	23.4465	18.947	2.495	level2	Valganciclovir	14.791	12.065	8.908	level2			LPE 16:0	19.453	16.789	5.68
(4E,8E)-10-(4-hydroxy-6-methoxy-7-methyl-3-oxo-1H-2-benzofuran-5-yl)-4,8-dimethyldeca-4,8-dienoic acid	13.34	11.178		level2	1-Palmitoyl-2-lauroyl-sn-glycero-3-phosphorylcholine	22.145	18.958	4.768	level2	N-Acetylneuraminic acid	7.922		8.912	level2			ST 24:1;O4	16.996	12.276
9-Oxo-11-(3-pentyl-2-oxiranyl)-10E-undecenoic acid	13.84	11.582		level2	PI 38:5	22.26	18.964		level2	Asn-Val	8.08		8.923	level2			N,N-Dimethyldodecylamine N-oxide	16.21	13.77
cis-2-Decenoic acid	14.28	11.675		level2	ST 29:1;O;S	22.379	18.981		level2	NG,NG-Dimethyl-L-arginine	8.043	1.135	8.929	level2			Calusterone	20.769
Glu-Asp	14.552	11.755		level2	1,2-Di-(9Z,12Z,15Z-octadecatrienoyl)-sn-glycero-3-phosphocholine	22.1472	18.985	4.559	level2	Clusiacyclol A	8.145		8.959	level2			FA 18:2;O		14.732
(6E,10Z,14E)-6,14-Dimethyl-3-methylidene-2-oxo-3a,4,5,8,9,12,13,15a-octahydrocyclotetradeca[b]furan-10-carboxylic acid	13.7	11.914		level2	PC 38:9	22.216	18.985		level2	3-(3,4,5-Trimethoxyphenyl)propanohydrazide	8.098		8.981	level2			FA 16:0(2OH)	17.9	15.471
ST 24:1;O4	16.996	12.276		level2	CAR 26:0	22.139	18.994		level2	Glycerol 3-phosphate; LC-tDDA; CE10	8.037		9	level2			16-Hydroxyhexadecanoic acid	19.09	16.456
Carebastine	14.815	12.412		level2	PS 40:7	22.364	18.999	5.738	level2	Decoyinine	8.135		9.005	level2			4-tert-Butyl-N-(4-nitrophenyl)benzamide	20.539
Piperine	15.217	12.594		level2	SM 34:2;O2|SM 18:2;O2/16:0	22.244	19.001		level2	Linustatin	8.153		9.035	level2			FA 14:1	17.659	15.346
1,6-Dioxacyclohexadecane-7,16-dione	15.426	12.743		level2	1-Palmitoyl-2-arachidonoyl-sn-glycero-3-phosphoserine	22.369	19.013	5.782	level2	Lys-Leu	8.135		9.041	level2			CAR 18:2	18.652	16.057	2.858
5-Androsten-3.beta.,17.beta.-diol-3-sulfate	14.149	12.759		level2	PE 30:1|PE 14:0_16:1		19.016		level2	Ala-Leu	6.489		9.099	level2			(1R,5R,9S,15S)-15-(acetyloxy)-5,9-dimethyl-14-methylidenetetracyclo[11.2.1.0??,?????.0???,???]hexadecane-5-carboxylic acid	16.568	14.361
1-Decanoyl-2-hydroxy-sn-glycero-3-phosphocholine	15.459	12.829		level2	FA 24:1	22.097	19.017	0.995	level2	Tetraazolo[1,5-a]pyridine-8-carboxylic acid	6.247		9.105	level2			LPA 18:3	20.517	17.775	5.732
(3.beta.)-Allopregnanolone sulfate	14.643	12.841		level2	Nervonic acid	22.097	19.017	0.995	level2	6-Formylpterin	6.89		9.105	level2			Tri(butoxyethyl) phosphate	17.623	15.063
Bufalin	15.464	12.89		level2	PC 40:10	22.315	19.028		level2	Secobarbital	8.049		9.118	level2			FA 20:2;O2	15.525	13.331
Octyl gallate	15.096	12.896		level2	PC 36:7	22.304	19.042		level2	N-[(5-Bromo-2-fluorophenyl)methyl]cyclopropanamine	8.182		9.133	level2			LPC O-15:0	19.41	16.806
(9Z,12E)-15,16-Dihydroxyoctadeca-9,12-dienoic acid	14.42	12.971		level2	PE 38:7|PE 16:1_22:6	22.336	19.042		level2	3-[(Dimethylcarbamothioyl)sulfanyl]propane-1-sulfonic acid	8.197		9.139	level2			2-(4-Bromophenyl)-8-methyl-4-quinolinecarboxylic acid	8.794		9.466
cis-4,10,13,16-Docosatetraenoic acid		12.979		level2	PC 42:10	22.369	19.048	4.342	level2	Pilocarpine	8.331	6.161	9.155	level2			Dothiepin	4.284	3.591	6.236
FA 20:4;O3	14.042	13.068		level2	PS 34:2	22.445	19.048	5.825	level2	N'-(4-Ethoxyphenyl)-N,N-dimethylurea	8.331		9.155	level2			Tris(1,3-dichlorisopropyl)phosphate (TDCPP)	16.298
1-Naphthalenepentanoic acid, 5-carboxy-1,2,3,4,4a,7,8,8a-octahydro-7-hydroxy-.beta.,1,2,4a-tetramethyl-	15.321	13.068		level2	Cer 32:1;O2|Cer 16:1;O2/16:0	22.293	19.051	1.024	level2	Muramic acid	8.16335		9.16	level2			LPC 18:3/0:0	3.719	15.693	5.509
Hymeglusin	15.633	13.089		level2	PA 36:4|PA 16:0_20:4	24.0711	19.058		level2	Ginkgolide C	8.315		9.161	level2			LPC 18:3	18.557	15.905	5.509
3-Dehydrocholic acid	15.343	13.307		level2	PE 32:2|PE 16:1_16:1	22.015	19.065	4.909	level2	N-(2-Hydroxyethyl)-2-methyl-5-nitrobenzenesulfonamide	8.27		9.182	level2			LPE O-16:1	19.8278	17.109
9,10-Dihydroxy-12Z-octadecenoic acid	18.639	13.54		level2	SM 36:3;O2|SM 18:2;O2/18:1	23.05	19.08		level2	Ortophosphate	8.25		9.207	level2			LPC 17:1/0:0	19.207	16.33
N,N-Dimethyldodecylamine N-oxide	16.21	13.77		level2	SM 32:0;O2	22.38	19.087		level2	N2-Isobutyryl-2'-deoxyguanosine	8.298	6.289	9.212	level2			(3-Amino-6-phenylthieno[2,3-b]pyridin-2-yl)(phenyl)methanone	12.31		2.067
Lauryl gallate	16.32	13.785		level2	LPC O-24:0	22.363	19.102	5.459	level2	N.epsilon.-Methyl-L-lysine	8.391		9.241	level2			Irbesartan	14.708	12.634
Perfluorooctanesulfonic acid	16.516	13.856		level2	PC 40:8	22.477	19.105		level2	Oxadiargyl	8.328		9.254	level2			LPE 18:2	19.849	16.245	5.733
3,5-Di-tert-butyl-2-hydroxybenzaldehyde	16.483	13.909		level2	1,2-Diarachidonoyl-sn-glycero-3-phosphocholine	22.477	19.105		level2	D-Ribose 1-phosphate	8.312		9.256	level2			LPA 18:2	3.711	17.473
5-(8Z-Heptadecenyl)resorcinol		14.081		level2	Cer 34:2;O2|Cer 18:2;O2/16:0	22.416	19.109	1.024	level2	S-Methyl-methionine; LC-tDDA; CE10	8.448		9.264	level2			LPC O-16:1	19.778	17.083
3-Dodecyloxypropylamine	16.64	14.189		level2	Hex2Cer 34:1;O2|Hex2Cer 18:1;O2/16:0	22.445	19.112	5.525	level2	3-Deoxy-D-glycero-D-galacto-2-nonulosonic acid	8.287		9.267	level2			FA 20:1;O2	16.376	14.197
Hexadecanedioic acid, 3,3,14,14-tetramethyl-	16.376	14.197		level2	1,2-Diarachidonoyl-sn-glycero-3-phosphoethanolamine	22.5	19.112		level2	Austalide D	8.438	3.358	9.276	level2			PFSA-perfluoroalkyl_branched_C3; C8HF17O3S	16.55	14.15
FA 20:1;O2	16.376	14.197		level2	SM 33:1;O2|SM 15:1;O2/18:0	22.4654	19.116		level2	4-Methylpyrimidine	7.221		9.293	level2			Perfluorooctanesulfonic acid	16.516	13.856
Agaric acid	16.803	14.266		level2	1,2-Dipalmitoyl-sn-glycero-3-phosphoethanolamine	22.434	19.123	4.747	level2	Glu-Asn	8.385		9.3	level2			Agaric acid	16.803	14.266
Arg-Tyr-Arg	16.873	14.29		level2	PC 29:0	22.434	19.123		level2	O-Phosphorylethanolamine	8.383		9.317	level2			MG 19:3	19.208	16.52
NAGly 24:3;O	17.129	14.292		level2	LPC O-26:1		19.123		level2	Val-Glu-Lys	8.51886		9.325	level2			(3S)-5-[(1R,2R,8aS)-2-hydroxy-2,5,5,8a-tetramethyl-3,4,4a,6,7,8-hexahydro-1H-naphthalen-1-yl]-3-methylpentanoic acid	17.936	16.912
(1R,5R,9S,15S)-15-(acetyloxy)-5,9-dimethyl-14-methylidenetetracyclo[11.2.1.0??,?????.0???,???]hexadecane-5-carboxylic acid	16.568	14.361		level2	PI 40:6	22.67	19.147		level2	3'-.alpha.-Sialyl-N-acetyllactosamine	8.649	0.847	9.358	level2			LPA 17:0	20.987
Diosgenin		14.411		level2	PE(18:2e/13-HODE)	23.785	19.171		level2	[DAla2] .alpha.-Neo-Endorphin (1-2), amide	8.534	4.111	9.358	level2			FA 16:3	17.758	15.387
5-Tetradecynoic acid	16.855	14.543		level2	SM 35:2;O2|SM 21:1;O2/14:1	22.53	19.173		level2	1-isothiocyanato-7-methanesulfinylheptane	8.25		9.37	level2			Lauryl gallate	16.32	13.785
N-Demethylsambutoxin	17.121	14.553		level2	PE 38:4	23.755	19.179		level2	Ala-Lys	8.558		9.413	level2			Arachidonoyl-carnitine; LC-tDDA; CE20	18.648	16.046	3.26
Octanediamide, N1-hydroxy-N8-[4-[4-[(1-oxo-5-hexyn-1-yl)amino]benzoyl]phenyl]-	17.104	14.557		level2	PG 44:12|PG 22:6_22:6	22.71	19.179		level2	.alpha.-Asp-Gly	8.534		9.419	level2			CAR 20:4	18.648	16.046	3.26
Benzyl-butyl-phthalate	17.136	14.586		level2	PA 34:2|PA 16:0_18:2	23.35	19.179		level2	ANSERINE	8.558		9.419	level2			LPC 18:2/0:0	19.078	16.209	5.469
1.alpha.-Methyl-5.alpha.-androstan-3.alpha.,17.beta.-diol glucuronide	16.648	14.605		level2	HexCer 34:1;O2|HexCer 18:1;O2/16:0	22.5248	19.188		level2	L-Homocarnosine	8.57694		9.426	level2			3-Hydroxy-2-((9Z,12Z)-octadeca-9,12-dienoyloxy)propyl 2-(trimethylazaniumyl)ethyl phosphate	19.078	16.416
6-oxopristimerol	17.2	14.614		level2	PG 34:1|PG 16:0_18:1	22.6944	19.194	2.804	level2	Asp-Thr	8.492		9.435	level2			LPA 20:5	20.087	17.692
9-(Benzylamino)-1,2,3,4-tetrahydroacridin-1-ol	17.191	14.628		level2	PI 38:4	22.776	19.194	5.846	level2	His-Gly	8.545		9.441	level2			1-Hexadecyl lysophosphatidic acid	21.061	18.483
N-Dodecanoyl-N-methylglycine		14.661		level2	Cer 36:3;O2|Cer 18:1;O2/18:2		19.195		level2	Tolcapone	8.569		9.478	level2			12-HEPE	16.739	14.709
NCGC00380688-01_C13H16O4_1-[3-Hydroxy-2-(2-hydroxy-2-propanyl)-2,3-dihydro-1-benzofuran-5-yl]ethanone	14.998	14.665		level2	4-Cholestenone	22.418	19.216		level2	4-(3-Aminophenoxy)phthalic acid	8.569		9.478	level2			NAGlySer 22:0;O		17.025
Monomethyl phthalate	17.23	14.666		level2	1,2-Dilinoleoyl-sn-glycero-3-phosphocholine	22.683	19.222	4.545	level2	N-(2,3-Dimethylphenyl)-4-methylbenzenesulfonamide	8.603		9.486	level2			FA 20:5;O	17.252	14.951
N-3-Oxotetradec-7Z-enoyl-L-homoserine lactone	19.883	14.671		level2	Cer 33:1;O2|Cer 17:1;O2/16:0	22.619	19.229	1.024	level2	2-Hydroxy-2-(2-methoxy-2-oxoethyl)butanedioic acid	4.29		9.488	level2			5-HEPE	17.252	14.951
CAR 16:3	17.213	14.691		level2	PS 40:6|PS 18:0_22:6	22.9086	19.242		level2	Topiramate	4.951		9.497	level2			LPC 17:0/0:0	3.656	16.832	5.434
FA 18:2;O		14.732		level2	PS 42:9	22.854	19.248		level2	N-Acetylglucosaminylasparagine	8.592		9.497	level2			Hecogenin	18.155	15.518
taurohyodeoxycholic acid	16.582	14.812		level2	PG 36:4	23.014	19.266		level2	Isofraxoside	8.631	1.35	9.511	level2			Butyl 2-ethylhexyl phthalate	18.137	16.65
5-HEPE	17.252	14.951		level2	PG 38:6	22.941	19.266		level2	6-Sialylgalactose	8.608		9.544	level2			LPC 20:5/0:0	3.692	15.691	5.427
CAR 16:2	17.613	15.089		level2	FA 25:1	22.506	19.286		level2	Gly-Lys	8.667		9.551	level2			LPA 18:1	20.517	17.261	5.611
FA 22:6;O	18.292	15.216		level2	1-Palmitoyl-2-myristoyl-sn-glycero-3-phosphocholine	22.755	19.288	1.167	level2	Asp-Asp	8.623	0.653	9.555	level2			9Cl-PF3ONS (9-chlorohexadecafluoro-3-oxanonane-1-sulfonate) (major component of F-53B)	16.922	14.61
LPE 13:0	17.579	15.279		level2	PC 30:0	22.755	19.288	1.472	level2	Asp-Gln	8.639		9.562	level2			MG 24:3		18.334
FA 14:1	17.659	15.346		level2	SM 34:1;O2|SM 18:1;O2/16:0	3.74897	19.288		level2	Asn-Glu	8.639		9.562	level2			LPC O-16:0	3.737	17.199
FA 16:3	17.758	15.387		level2	PC 39:5	23.421	19.294		level2	Arg-Glu	8.662		9.57	level2			FA 18:1;O	19.127	15.339
1,3-Benzenediol, 5-(10-nonadecenyl)-, (Z)-	17.945	15.402		level2	PC 38:6	3.74	19.296	4.008	level2	Asp-Ser	8.656		9.591	level2			FA 16:2	18.17	15.777
LPG O-13:1	17.174	15.415		level2	PC O-33:6	18.882	19.305		level2	Asp-Gly-Asp	8.669		9.61	level2			LPE 20:4	3.771	17.547	5.784
FA 20:3;O	17.9	15.445		level2	PE 32:1|PE 16:0_16:1	22.885	19.337		level2	1-(4-Bromophenyl)-4-methylpiperazine	8.725		9.628	level2			1-Oleoyl-sn-glycero-3-phosphocholine	20.708	16.744	5.42
Hecogenin	18.155	15.518		level2	PE 40:6|PE 18:1_22:5		19.365		level2	Asp-Asn	8.725		9.656	level2			LPA 20:4	20.694	18.201
7.alpha.-Hydroxy-3-oxo-4-cholestenoic acid	18.155	15.518		level2	PC O-38:6		19.365		level2	5-Hydroxylysine; LC-tDDA; CE10	8.807		9.681	level2			Radiclonic acid	20.113
LPC 16:3/0:0		15.56		level2	SM 35:1;O2|SM 21:1;O2/14:0	23.119	19.387		level2	Arg-Gly			9.692	level2			FA 22:3;O2	16.163	14.396
C12-AE1S (TENTATIVE)	18.2	15.658		level2	Cer 34:1;O2|Cer 18:1;O2/16:0	22.945	19.398	1.024	level2	.gamma.-Glu-.epsilon.-Lys	8.812		9.696	level2			1-(1Z-Hexadecenyl)-sn-glycero-3-phosphocholine	19.778	17.083
FA 22:1;O2	17.7	15.672		level2	1-Palmitoyl-3-oleoyl-sn-glycero-2-phosphoethanolamine	23.654	19.398	3.016	level2	Lys-Asp	8.808		9.707	level2			8-HETE	17.391	15.178
FA 16:2	18.17	15.777		level2	PC 38:5	23.056	19.398	3.944	level2	Asp-Lys	8.808		9.707	level2			FA 20:4;O	17.956	15.593
FA 18:4		15.778		level2	PC 35:5|PC 15:1_20:4	23.0911	19.401		level2	Asp-Arg	8.805		9.709	level2			5S-Hydroxy-6E,8Z,11Z,14Z-eicosatetraenoic acid	17.956	15.593
10-HDoHE	18.292	15.911		level2	PC 34:2	3.737	19.425	4.649	level2	Asp-His	8.808		9.714	level2			LPC O-17:1	20.08	17.314
4-Hydroxy-5E,7Z,10Z,13Z,16Z,19Z-docosahexaenoic acid	18.292	15.911		level2	PE 34:2|PE 16:0_18:2	23.072	19.437	4.904	level2	CITRIC ACID	8.575		9.717	level2			NAE 20:4	20.207	17.608
FA 18:1;O2		16.167		level2	SM 34:0;O2	23.051	19.452		level2	Asp-Gly-Arg	8.824		9.741	level2			LPC 20:4/0:0	19.041	17.692	5.392
1-Ethyl-6,11-dihydroxy-3-methyl-10-methylenedodecahydro-3,6a,12-(epiethane[1,1,2]triyl)-9,11a-methanoazuleno[2,1-b]azocin-8(9H)-one	18.924	16.186		level2	DG 30:1|DG 16:0_14:1	23.1173	19.459		level2	N-Methyl-2-oxo-N-phenyl-2H-chromene-3-carboxamide	8.878		9.83	level2			LPE 18:0	20.226	17.505	5.795
LPC 17:1/0:0	19.207	16.33		level2	N-Oleoyl-4-sphingenine	23.087	19.465	1.024	level2	3,5-Dihydroxy-2-(4-hydroxyphenyl)-3,4-dihydro-2H-chromen-7-yl pentofuranoside	8.883		9.842	level2			FA 18:4		15.778
FA 20:5	18.693	16.348		level2	Cer 36:2;O2|Cer 18:2;O2/18:0	23.087	19.465	1.024	level2	5-(Galactosylhydroxy)-L-lysine	8.941		9.881	level2			LPA 18:0	21.471	18.765	5.67
LPC 22:6/0:0	19.399	16.348		level2	PI 36:1		19.481		level2	Ser-Lys	9.082		10.023	level2			LPE O-18:2	19.966	17.252	5.667
LPC O-14:0	19.01	16.352		level2	DG 32:2|DG 16:1_16:1	23.177	19.496		level2	2-Propenoic acid, 3-(4-iodophenyl)-2-mercapto-, (2Z)-	9.122		10.087	level2			Octanediamide, N1-hydroxy-N8-[4-[4-[(1-oxo-5-hexyn-1-yl)amino]benzoyl]phenyl]-	17.104	14.557
cis-7-Hexadecenoic acid	18.82	16.378		level2	SM 36:1;O2|SM 18:1;O2/18:0	23.514	19.501	5.767	level2	Methylenediphosphonic acid	9.128		10.087	level2			BA 24:1;O3;G;S	15.107	13.053	5.327
GKK 1032B	19.805	16.416		level2	PC O-30:0	23.202	19.516		level2	CROTONIC ACID	3.956	0.667		level2			(R)-2-hydroxystearic acid	19.129	16.621
3-Hydroxy-2-((9Z,12Z)-octadeca-9,12-dienoyloxy)propyl 2-(trimethylazaniumyl)ethyl phosphate	19.078	16.416		level2	SM 37:2;O2	23.18	19.527		level2	3-HYDROXY-3-METHYLGLUTARATE	3.873	0.703		level2			3-Hydroxyoctadecanoic acid	19.872	16.621
16-Hydroxyhexadecanoic acid	19.09	16.456		level2	PG 40:7|PG 18:1_22:6	23.48	19.53		level2	Methylsuccinic acid	10.35	0.703		level2			FA 18:0(2OH)	19.129	16.621
9-Oxo-11.alpha.,16R-dihydroxy-17-cyclobutyl-5Z,13E-dien-1-oic acid	19.18	16.494		level2	Cer 34:0;O2|Cer 18:0;O2/16:0	23.2534	19.55		level2	5-Sulfosalicylic acid	5.285	0.79		level2			12-Hydroxyoctadecanoic acid	19.495	16.913
MG 19:3	19.208	16.52		level2	1-(1Z-Octadecenyl)-2-(4Z,7Z,10Z,13Z,16Z,19Z-docosahexaenoyl)-sn-glycero-3-phosphocholine	23.364	19.553	4.42	level2	6'-Sialyllactose	8.681	0.794		level2			LPA 21:5	20.087
LPI 18:2	19.09	16.542		level2	PS 40:4	23.535	19.56		level2	Acetyl-L-threonine	4.524	0.863		level2			8-(3-Octyl-2-oxiranyl)octanoic acid	17.515	18.259
LPI 20:4	19.065	16.564		level2	PE O-38:6|PE O-18:2_20:4	23.524	19.573		level2	5-Methyl-2-(methylsulfanyl)[1,2,4]triazolo[1,5-a]pyrimidin-7-ol		1.115		level2			cis-7-Hexadecenoic acid	18.82	16.378
NAE 22:4	19.253	16.581		level2	PG 38:5|PG 18:1_20:4	23.569	19.574		level2	Symmetric dimethylarginine; LC-tDDA; CE10	8.058	1.135		level2			FA 16:1	19.313	16.759
FA 18:0(2OH)	19.129	16.621		level2	PC O-32:1	23.353	19.575	4.642	level2	URACIL	10.371	1.24		level2			LPE 20:3	20.223	17.874
Butyl 2-ethylhexyl phthalate	18.137	16.65		level2	PE O-39:4	23.6588	19.599	4.027	level2	Hydroxysebacic acid	10.387	1.375		level2			LysoPC(0:0/18:0)	20.204	17.492	5.399
FA 16:1	19.313	16.759		level2	DG 34:3|DG 16:0_18:3	23.5591	19.602		level2	Methyl 4-hydroxy-3,5-dimethoxybenzoate		1.461		level2			LPA 20:3	21.471	18.762
LPC 22:5/0:0	19.475	16.785		level2	PS 36:1|PS 18:0_18:1	3.808	19.606	5.825	level2	2,5-dihydroxybenzenesulfonate	3.72	1.539		level2			LPC O-18:2	19.946	17.226
FA 20:5;O2	19.174	16.787		level2	FA 26:1	23.01	19.616		level2	Thr-Pro	4.56509	1.546		level2			NAE 21:5	20.594	17.844
testosterone cypionate	19.497	16.789		level2	PC O-31:0	23.5996	19.623		level2	2-Hydroxy-4-methoxybenzaldehyde		1.564		level2			FA 20:3;O	17.9	15.445
LPC O-15:0	19.41	16.806		level2	PE 35:2|PE 17:1_18:1	23.4775	19.625		level2	Benzoic acid		1.603		level2			N-Oleoyl-L-serine	17.233	14.721	3.614
2-(5-Oxovaleryl)phosphatidylcholine	19.504	16.812		level2	Dilauryl thiodipropionate		19.631		level2	HYDROXYPHENYLLACTIC ACID	10.387	1.61		level2			LPC O-17:0	20.14	17.538
NAE 18:4	19.58	16.881		level2	PC O-38:5	23.411	19.64	4.462	level2	5-Methoxysalicylic acid sulfate	10.363	1.657		level2			LPE 22:6	19.777	17.547
FA 17:1	19.4	16.9		level2	PC 40:6	23.561	19.652	1.134	level2	N-Butyrylglycine; LC-tDDA; CE10	3.696	1.667		level2			NAE 20:3	20.566	17.818
(3S)-5-[(1R,2R,8aS)-2-hydroxy-2,5,5,8a-tetramethyl-3,4,4a,6,7,8-hexahydro-1H-naphthalen-1-yl]-3-methylpentanoic acid	17.936	16.912		level2	1-Stearoyl-2-docosahexaenoyl-sn-glycero-3-phosphocholine	23.561	19.652	4.476	level2	2,5-DIHYDROXYBENZOATE	3.74	1.795		level2			LPA 22:6	20.056	17.678
12-Hydroxyoctadecanoic acid	19.495	16.913		level2	2-Oleoyl-1-palmitoyl-sn-glycero-3-phosphocholine	23.632	19.712	1.147	level2	N-(2-FUROYL)GLYCINE	3.712	1.986		level2			LPE O-18:1	20.5376	17.759	5.65
NAE 16:2		16.929		level2	PE 34:1|PE 16:0_18:1	23.654	19.723	3.016	level2	6-Methyl-1,2,3-oxathiazin-4(3H)-one 2,2-dioxide		2.096		level2			2-(5-Oxovaleryl)phosphatidylcholine	19.504	16.812
MG 18:2		16.947		level2	SM 38:2;O2|SM 18:2;O2/20:0	23.676	19.733		level2	(2E)-4-Anilino-4-oxo-2-butenoic acid		2.132		level2			Diosgenin		14.411
LPC 22:4/0:0	19.713	17.015		level2	PI 32:1|PI 16:0_16:1	24.06	19.739		level2	2-Hydroxypyridine sulfate		2.211		level2			2-Arachidonyl glycerol ether	20.9	18.138
NAGlySer 22:0;O		17.025		level2	PC 38:4	23.74	19.752	4.502	level2	Phloroglucinolcarboxylic acid		2.365		level2			FA 22:6;O	18.292	15.216
PC O-35:9	19.769	17.045		level2	PE 38:4	23.7704	19.759		level2	3-Hydroxy-2-methyl-4-pyrone sulfate	11.1647	2.457		level2			10-HDoHE	18.292	15.911
1-(1Z-Hexadecenyl)-sn-glycero-3-phosphocholine	19.778	17.083		level2	PG 38:4|PG 18:2_20:2	24.0288	19.816		level2	3-Methylhexahydropyrrolo[1,2-a]pyrazine-1,4-dione		2.582		level2			4-Hydroxy-5E,7Z,10Z,13Z,16Z,19Z-docosahexaenoic acid	18.292	15.911
LPC O-16:1	19.778	17.083		level2	PC 36:2	23.86	19.82	1.147	level2	Cytidine 5'-monophosphate		2.67		level2			LPC 19:1/0:0	19.994	17.268
LPI 18:1	19.705	17.088		level2	Cer 36:1;O2|Cer 18:1;O2/18:0	23.779	19.824		level2	PyroGlu-Pro	4.76157	2.701		level2			7.alpha.,24(S)-Dihydroxy-4-cholesten-3-one	18.381
LPE O-16:1	19.8278	17.109		level2	PE P-40:6|PE P-18:0_22:6	23.9109	19.84	4.702	level2	Paracetamol	3.83	2.73		level2			FA 21:3;O		17.343
LPC 20:2/0:0	19.865	17.146		level2	PG 40:6	23.771	19.86		level2	Alfa_hydroxy_hippuric_acid	3.77977	2.742		level2			FA 16:0	19.55	23.008
LPE 15:0	19.748	17.157		level2	PG 32:1|PG 16:0_16:1		19.86		level2	Phenylalanine betaine	3.96774	2.924		level2			LPC 22:6/0:0	19.399	16.348
LPE 16:1	19.467	17.198		level2	PC O-32:1|PC O-16:1_16:0	23.4146	19.868		level2	4.5-Dimethyl-3-hydroxy-2,5-dihydrofuran-2-one sulfate		2.988		level2			LPC O-18:1	3.683
LPC O-16:0	3.737	17.199		level2	SM 36:0;O2	23.9724	19.875	4.994	level2	1-Amino-3-hydroxyadamantane	4.49	3.028		level2			FA 22:1;O2	17.7	15.672
LPC O-18:2	19.946	17.226		level2	DG 32:1|DG 16:0_16:1	23.891	19.888		level2	3-Tetrahydro-2-furanylpropanoic acid		3.127		level2			7.alpha.-Hydroxy-3-oxo-4-cholestenoic acid	18.155	15.518
NAE 20:5	19.949	17.236		level2	PC O-34:2	23.535	19.902	4.601	level2	Acetaminophen sulfate		3.21		level2			Tetradecanamide, N-[(1R,2R)-2-hydroxy-1-(hydroxymethyl)-2-(4-nitrophenyl)ethyl]-	21.23	18.649
LPC 19:1/0:0	19.994	17.268		level2	PE 40:6|PE 18:0_22:6	21.339	19.904	4.773	level2	PHIP	11.178	3.248		level2			LPA 19:0	21.962	19.11
MG 16:0		17.271		level2	PE 36:2	3.726	19.915	4.859	level2	Isoxanthohumol	4.71	3.273		level2			FA 18:3	18.629	17.857
4-Imidazolidineheptanoic acid, 3-[(3R)-3-cyclohexyl-3-hydroxypropyl]-2,5-dioxo-, (4R)-rel-	19.966	17.271		level2	PC O-38:4	23.9828	19.921		level2	4-Nitroaniline		3.303		level2			Pinolenic acid	20.561	17.857
FA 22:5	19.497	17.294		level2	PC O-40:6	23.692	19.921		level2	Intermedine N-oxide	4.541	3.314		level2			9Z,11E,13E-Octadecatrienoic acid	21.007
LPC O-17:1	20.08	17.314		level2	PE P-34:1|PE P-16:0_18:1	23.9742	19.923	4.803	level2	Ile-Tyr	13.229	3.368		level2			NAE 16:2		16.929
FA 21:3;O		17.343		level2	PI 36:4|PI 16:0_20:4	19.9866	19.926		level2	Troxipide	13.229	3.368		level2			LPC 20:2/0:0	19.865	17.146
Yohimbic Acid	20.071	17.351		level2	PC 41:7	23.267	19.94		level2	N-Benzoylserine	11.69	3.441		level2			FA 17:1	19.4	16.9
dG-C8-2,4-DMA	20	17.351		level2	PC 42:6	24.028	19.941		level2	Saccharin		3.521		level2			Arachidonoyl-1-thioglycerol	14.351	11.728	3.13
FA 20:3	19.633	17.368		level2	PE P-38:4|PE P-18:0_20:4	24.0426	19.941		level2	Asp-Ile		3.551		level2			NAE 22:5	19.957
1-O-Hexadecyl-2-O-(2E-butenoyl)-sn-glyceryl-3-phosphocholine	20.323	17.424		level2	PE 35:1|PE 17:0_18:1	24.0039	19.945		level2	(5aR,10aR)-Octahydrodipyrrolo[1,2-a:1',2'-d]pyrazine-5,10-dione	4.52	3.609		level2			1.alpha.-Methyl-5.alpha.-androstan-3.alpha.,17.beta.-diol glucuronide	16.648	14.605
LPC 20:1/0:0	20.323	17.424		level2	PI 34:2|PI 16:0_18:2	3.90712	19.948		level2	Phenol sulfate	11.438	3.635		level2			LPC 22:5/0:0	19.475	16.785
LPA 18:2	3.711	17.473		level2	PC 35:3|PC 15:0_20:3	24.095	19.955		level2	5-(Amidinoamino)-2-amino-N-(2-naphthyl)pentanamide	12.566	3.713		level2			LPA 20:1	21.471
LPC 17:3	19.5	17.508		level2	PC O-32:0	3.704	19.967		level2	Lycopsamine	12.566	3.713		level2			LPC O-18:0	20.5967	17.844
FA 24:6		17.511		level2	PC O-36:4	24.0589	19.995	4.516	level2	AMINO(4-HYDROXYCYCLOHEXYL)ACETIC ACID	12.58	3.792		level2			NAE 20:5	19.949	17.236
LPC O-20:2	20.269	17.515		level2	PC O-34:1	3.682	19.995		level2	(2-oxo-2,3-dihydro-1H-indol-3-yl)acetic acid		3.833		level2			3-((Ethoxy(hydroxy)phosphoryl)oxy)-2-hydroxypropyl (9Z,12Z)-octadeca-9,12-dienoate	20.715	18.216
LPA 15:0	19.977	17.535		level2	1-Hexadecyl-2-(9Z-octadecenoyl)-sn-glycero-3-phosphocholine	3.682	19.995		level2	4-HYDROXYPHENYL ACETIC ACID	11.65	3.855		level2			NAGly 24:3;O	16.633	14.657	4.914
LPC O-17:0	20.14	17.538		level2	Cer 42:4;O2|Cer 18:2;O2/24:2	24.07	19.996		level2	5-HYDROXYINDOLE-3-ACETIC ACID		3.856		level2			NAGly 24:3;O	17.129	14.292
FA 17:0	20.13	17.539		level2	PG 36:2|PG 18:1_18:1	20.6912	20.014	2.745	level2	2,5-Dimethoxy-4-iso-propylthioamphetamine	3.9305	3.985		level2			FA 18:2	19.604	18.292
LPE 22:6	19.777	17.547		level2	PE P-36:2|PE P-18:0_18:2	24.1	20.039	4.76	level2	3-[(1E,3E)-Hepta-1,3-dienyl]pentanedioic acid	11.386	4.015		level2			Hexadecanedioic acid, 3,3,14,14-tetramethyl-	16.376	14.197
NAE 20:4	20.207	17.608		level2	1-(1Z-Octadecenyl)-2-(9Z-octadecenoyl)-sn-glycero-3-phosphocholine	24.1735	20.043		level2	Monocrotaline	4.13669	4.074		level2			2,2'-Methylene-bis(6-tert-butyl-4 methylphenol)	20.586	18.272
FA 20:2	20.16	17.645		level2	DG 36:3|DG 18:1_18:2	24.1754	20.053		level2	.beta.-Nicotinamide mononucleotide		4.095		level2			NAE 20:1	19.819	17.104
LPA 22:6	20.056	17.678		level2	1-Linoleoyl-2-oleoyl-rac-glycerol	23.2127	20.053		level2	Tyr-Pro	6.5	4.177		level2			LPC 20:1/0:0	20.323	17.424
LPA 20:5	20.087	17.692		level2	N-(Dodecanoyl)sphing-4-enine-1-phosphate	24.0491	20.058		level2	Cryptostrobin	4.27	4.189		level2			FA 17:0	20.13	17.539
Polyporusterone A	20.487	17.738		level2	PG 34:2	23.5052	20.072	1.441	level2	6a,9-Dihydroxy-2-(3-hydroxyprop-1-en-2-yl)-8-methoxy-1,2,12,12a-tetrahydrochromeno[3,4-b]furo[2,3-h]chromen-6(6aH)-one	12.317	4.202		level2			1-(1Z-Octadecenyl)-sn-glycero-3-phosphocholine	20.48	17.732	5.252
FA 19:1	20.32	17.753		level2	PC O-40:5|PC O-18:5_22:0	24.1	20.077		level2	Phenol	11.95	4.244		level2			GKK 1032B	19.805	16.416
Biliverdin	20.6866	17.766		level2	PC 40:4	20.441	20.098		level2	4-Hydroxyquinoline	4.47	4.246		level2			FA 20:5	18.693	16.348
FA 24:5	20.334	17.817		level2	1-Palmitoyl-2-stearoyl-sn-glycero-3-phosphocholine	20.171	20.139		level2	1-(3-Chlorophenyl)-3-(4-sulfamoylphenyl)urea		4.249		level2			NAE 22:4	19.253	16.581
NAE 20:3	20.566	17.818		level2	SM 38:1;O2|SM 16:1;O2/22:0	20.5729	20.139		level2	3-Hydroxybenzoic acid sulfate	5.1	4.289		level2			LPC 22:4/0:0	19.713	17.015
N-(8Z,11Z,14Z-Eicosatrienoyl)ethanolamine	20.566	17.818		level2	PC O-42:6	20.974	20.146	4.427	level2	4-Cyanophenol sulfate		4.317		level2			Hex2Cer 34:1;O2|Hex2Cer 18:1;O2/16:0	22.441	19.129
Oleoyl ethylamide	20.585	17.84		level2	PE 38:4|PE 18:0_20:4		20.146	4.795	level2	2-Methoxyphenol sulfate	3.72	4.418		level2			Bis(2-ethylhexyl) adipate	20.992	17.905
NAE 21:5	20.594	17.844		level2	PE 36:1	20.839	20.193		level2	DL-o-Tyrosine	11.6369	4.418		level2			LPE O-19:0	21.2034	18.504
LPC O-18:0	20.5967	17.844		level2	PG 36:3|PG 18:1_18:2	23.701	20.234		level2	4-Methylhippuric acid	12.424	4.44		level2			Trans-Vaccenic acid	19.799	17.343
Phenol, 2-(3,7-dimethyl-2,6-octadienyl)-3-methoxy-5-(2-phenylethyl)-, (E)-	20.615	17.844		level2	PG 38:3|PG 18:1_20:2		20.234		level2	Hexamethylene??bisacetamide	4.218	4.454		level2			FA 18:1	19.799	17.343
LPE 20:3	20.223	17.874		level2	FAHFA 36:3;O|FAHFA 19:1/17:2;O	19.05	20.256		level2	Chloranocryl		4.464		level2			LPC 20:0/0:0	20.829	18.053
PC 21:0	20.65	17.881		level2	PE 36:2|PE 18:0_18:2	23.876	20.3	2.797	level2	Ciprofibrate		4.494		level2			LPC O-20:2	20.269	17.515
1,2-Dilauroyl-sn-glycero-3-phosphoethanolamine	20.65	17.881		level2	PC 17:0-20:3-d5_ISTD	21.5422	20.314		level2	[(6-Chloro-3-pyridazinyl)sulfanyl]acetic acid	12.013	4.538		level2			1-O-Hexadecyl-2-O-(2E-butenoyl)-sn-glyceryl-3-phosphocholine	20.323	17.424
Bis(2-ethylhexyl) adipate	20.992	17.905		level2	PE P-40:4|PE P-18:0_22:4	21.679	20.328		level2	(4R)-3-methylidene-4-[(E)-3-methyl-4-(4-methyl-5-oxooxolan-2-yl)but-2-enyl]oxolan-2-one	11.932	4.548		level2			Ilicicolin B	19.206	16.496	6.868
LPC O-20:1	20.68	17.916		level2	DG 32:0|DG 16:0_16:0	21.1	20.36		level2	2-(2-Anilino-2-oxoethoxy)benzoic acid		4.659		level2			LPA 21:1	21.962
NAE 19:3		17.93		level2	PEtOH 32:1|PEtOH 16:0_16:1		20.388		level2	.alpha.-Hydroxymetoprolol	3.72	4.662		level2			Bilirubin; LC-tDDA; CE30	14.201	17.766
9S,11R,15S-Trihydroxy-20a,20b-dihomo-5Z,13E-prostadienoic acid	20.908	17.931		level2	PC O-42:5	22.504	20.394		level2	N6-Threonylcarbamoyladenosine	4.899	4.676		level2			FA 20:4	19.245	16.851
Pipericine	20.7942	18.01		level2	Cer 40:2;O2|Cer 18:2;O2/22:0	21.577	20.401		level2	2,6-DIHYDROXYBENZOIC ACID	3.74	4.705		level2			Arachidonic acid	19.245	16.851
LPC O-22:2	20.851	18.053		level2	SM 39:1;O2	21.587	20.408	5.286	level2	NCGC00381364-01!3-propan-2-yl-2,3,6,7,8,8a-hexahydropyrrolo[1,2-a]pyrazine-1,4-dione		4.764		level2			FA 19:2	19.719
LPC 20:0/0:0	20.829	18.053		level2	DG 34:1|DG 16:0_18:1	21.439	20.409	0.987	level2	Indole-3-carboxylic acid	4.67755	4.779		level2			Carebastine	14.815	12.412
FA 20:1	20.73	18.098		level2	1-Oleoyl-2-palmitoyl-rac-glycerol	21.427	20.409		level2	3-O-Feruloylquinic acid	4.48	4.806		level2			N-(8Z,11Z,14Z-Eicosatrienoyl)ethanolamine	20.566	17.818
2-Arachidonyl glycerol ether	20.9	18.138		level2	PI 38:4|PI 18:1_20:3	23.23	20.41		level2	4-(1-Amino-2-carboxyethyl)benzoic acid	11.664	4.814		level2			PC 21:0	20.65	17.881
LPA 20:4	20.694	18.201		level2	PI 36:3|PI 18:0_18:3	22.3256	20.41		level2	1,3,8-Trimethyl-3,9-dihydro-1H-purine-2,6-dione		4.836		level2			6-oxopristimerol	17.2	14.614
NAE 19:2		18.203		level2	Cer 42:3;O2|Cer 18:2;O2/24:1		20.43	1.007	level2	Sinapoylcholine	13.743	4.882		level2			Urobilin	12.884	9.839	5.434
3-((Ethoxy(hydroxy)phosphoryl)oxy)-2-hydroxypropyl (9Z,12Z)-octadeca-9,12-dienoate	20.715	18.216		level2	PE P-36:1|PE P-18:0_18:1		20.437		level2	N'-Benzoyl-5-methyl-1H-indole-2-carbohydrazide	13.96	4.895		level2			LPC O-20:1	20.68	17.916
7-Oxocholesterol	21.012	18.236		level2	SM 41:2;O2|SM 17:1;O2/24:1	21.7048	20.445		level2	4-(N-Methylacetamido)benzoic acid	12.02	4.924		level2			NAE 19:2		18.203
LPC 21:0/0:0	21.08	18.289		level2	PC O-37:5	21.604	20.453		level2	O6-CM-dG	3.99	4.94		level2			testosterone cypionate	19.497	16.789
FA 19:0	21.01	18.292		level2	DG 36:2|DG 18:1_18:1	21.6655	20.47		level2	4-Acetamidoantipyrine		4.95		level2			Alisol B acetate	20.062
7,7-Dimethyl-(5Z,8Z)-eicosadienoic acid	20.957	18.315		level2	PI 34:1|PI 18:0_16:1	22.5672	20.477		level2	Heliotrine		4.968		level2			Phenol, 2-(3,7-dimethyl-2,6-octadienyl)-3-methoxy-5-(2-phenylethyl)-, (E)-	20.615	17.844
FA 22:2	20.957	18.315		level2	PC 40:3	22.084	20.482		level2	PARAXANTHINE	4.98	4.975		level2			FA 20:3	19.633	17.368
MG 24:3		18.334		level2	FA 16:1	18.622	20.487	1.041	level2	N-(2,6-Diisopropylphenyl)-5-methyl-3-isoxazolecarboxamide	11.856	5.024		level2			Miconazole	9.063
LPC O-22:1	21.224	18.397		level2	PC O-34:0	21.9438	20.496		level2	2,5-Dimethoxy-2'-hydroxychalcone	4.64	5.085		level2			FA 19:1	20.32	17.753
PC 34:3	23.511	18.468		level2	PC 42:4	22.309	20.548		level2	2,10,11-Trimethoxy-6-methyl-5,6,6a,7-tetrahydro-4H-dibenzo[de,g]quinolin-1-ol	11.7869	5.12		level2			Dihomo-.gamma.-linolenic acid methyl ester	20.988
1-Hexadecyl lysophosphatidic acid	21.061	18.483		level2	PC O-36:1	22.1356	20.548		level2	7-Hydroxycoumarin sulfate		5.132		level2			LPC 21:0/0:0	21.08	18.289
LPE O-19:0	21.2034	18.504		level2	PC O-46:8		20.555		level2	Theophyline	4.98	5.142		level2			7-Oxocholesterol	21.012	18.236
LPC 22:0/0:0	21.362	18.516		level2	PC O-40:4		20.577		level2	Cefixime		5.151		level2			LPC O-20:0	21.156	18.352	5.496
LPC 24:1/0:0	21.426	18.555		level2	PA 38:4|PA 18:1_20:3		20.61		level2	3-Hydroxy-2-[(Z)-oct-2-enyl]pentanedioic acid	11.615	5.169		level2			FA 20:2	20.16	17.645
FA 20:0	21.391	18.597		level2	PG 36:1|PG 18:0_18:1		20.61		level2	[(2-Methoxybenzoyl)amino]acetic acid	12.133	5.19		level2			cis-4,10,13,16-Docosatetraenoic acid		12.979
Tetradecanamide, N-[(1R,2R)-2-hydroxy-1-(hydroxymethyl)-2-(4-nitrophenyl)ethyl]-	21.23	18.649		level2	PEtOH 34:2|PEtOH 16:0_18:2	22.7117	20.698	1.136	level2	1,2,3,4-Tetrakis(4-pyridyl)thiophene	4.738	5.243		level2			Arachidonoyl amide	19.901
CAR 24:0	21.55	18.682		level2	Cer 41:2;O2|Cer 18:2;O2/23:0	22.477	20.701	1.007	level2	Met-Met		5.283		level2			NAGly 24:5	16.05	13.435	5.274
SM 32:2;O2|SM 18:2;O2/14:0	21.6	18.69		level2	PC O-44:6		20.71		level2	Tenofovir		5.463		level2			FA 19:0	21.01	18.292
(+)-.alpha.-Tocopherol	22.584	18.696		level2	N-Docosanoyl-4-sphingenyl-1-O-phosphorylcholine	22.52	20.724	5.286	level2	5-Hydroxy-4-oxo-2-phenyl-4H-chromen-7-yl .beta.-D-glucopyranosiduronic acid	4.641	5.494		level2			NAE 19:3		17.93
CAR 26:1	21.608	18.711		level2	1-Stearoyl-2-arachidonoyl-sn-glycero-3-phospho-(1'-myo-inositol)	22.781	20.741	5.846	level2	Apigenin	13.256	5.499		level2			N-Demethylsambutoxin	17.121	14.553
Docosanamide	21.67	18.751		level2	N-Nervonoyl-D-erythro-sphingosylphosphorylcholine	22.633	20.745		level2	Heliotrine N-oxide	4.35288	5.53		level2			FA 22:5	19.497	17.294
LPC O-22:0	21.731	18.761		level2	PC 40:2	16.92	20.795		level2	Flunixine		5.56		level2			5-(8Z-Heptadecenyl)resorcinol		14.081
LPA 20:3	21.471	18.762		level2	PI 36:2|PI 18:0_18:2	23.3844	20.808		level2	Tebupirimfos	12.0922	5.575		level2			FA 20:1	20.73	18.098
FA 23:1	21.671	18.77		level2	SM 44:3;O2		20.832		level2	(4-Methylphenyl)oxidanesulfonic acid	12.056	5.629		level2			LPC 22:0/0:0	21.362	18.516
LPC O-24:1	21.798	18.799		level2	PE P-38:4|PE P-16:0_22:4	23.552	20.84		level2	Pro-Phe	5.02	5.648		level2			FA 24:6		17.511
SM 31:1;O2	21.81	18.803		level2	1-Stearoyl-2-arachidonoyl-sn-glycero-3-phosphoserine	22.958	20.844	5.772	level2	3-[5-(2-Methylpropyl)-3,6-dioxopiperazin-2-yl]propanoic acid	12.2016	5.649		level2			LPC O-22:2	20.851	18.053
SM 33:2;O2|SM 16:1;O2/17:1	21.9827	18.873		level2	1-Stearoyl-2-linoleoyl-sn-glycero-3-phospho-L-serine	3.764	20.888	5.803	level2	3-Methylhippuric acid	12.006	5.735		level2			Oleoyl ethylamide	20.585	17.84
FA 24:2	21.748	18.88		level2	1-Stearoyl-2-docosahexaenoyl-sn-glycerol		20.893		level2	2-METHYLHIPPURIC ACID	12.006	5.735		level2			FA 20:0	21.391	18.597
LPC O-26:2	21.92	18.887		level2	DG 34:0|DG 17:0_17:0		20.897		level2	1-Propanone, 1-[4-(5'-chloro-3,5-dimethyl[2,4'-bipyridin]-2'-yl)-1-piperazinyl]-3-(methylsulfonyl)-	4.72	5.786		level2			LPC O-22:1	21.224	18.397
CAR 26:0	22.138	19.007		level2	SM 41:1;O2	23.3484	20.924	5.782	level2	Auricalasin		5.789		level2			ST 27:1;O;S	22.05
SM 34:2;O2|SM 18:2;O2/16:0	22.233	19.029		level2	PG 38:4|PG 18:0_20:4	24.01	20.939		level2	Necrostatin-1		5.808		level2			N-Cyclohexanecarbonyltetradecylamine	20.894
PC 34:4	22.844	19.056		level2	SM 43:2;O2	23.483	20.948	5.265	level2	Liarozole	11.554	5.846		level2			7,7-Dimethyl-(5Z,8Z)-eicosadienoic acid	20.957	18.315
PC 36:7	22.304	19.06		level2	Cer 40:1;O2|Cer 18:1;O2/22:0		20.965		level2	Ethyl 4-oxo-3-piperidinecarboxylate	12.4	5.854		level2			CAR 24:0	21.55	18.682
PC 42:10	22.37	19.063		level2	N-Tetracosenoyl-4-sphingenine		20.987	1.007	level2	17.beta.-Carboxy-17.alpha.-formyloxydexamethasone	3.85	5.892		level2			1,2-Dilauroyl-sn-glycero-3-phosphoethanolamine	20.65	17.881
PC 33:3	22.33	19.073		level2	1-Stearoyl-2-linoleoyl-sn-glycero-3-phospho-(1'-rac-glycerol)	23.5732	20.99		level2	apigenin-7-O-glucuronide	4.464	5.939		level2			LPC O-22:0	21.731	18.761
SM 34:0;O2	22.258	19.073		level2	SM 40:0;O2		21.022		level2	3'-(Cyclohexylamino)-4'-methoxyacetanilide		5.97		level2			Pipericine	20.7942	18.01
PC 43:9	22.403	19.085		level2	SM 44:4;O2|SM 16:1;O2/28:3		21.049		level2	8-Methoxy-4-oxo-1,4-dihydroquinoline-2-carboxylic acid	3.89726	6.087		level2			FA 22:2	20.957	18.315
SM 36:3;O2	22.3621	19.095		level2	SM 43:2;O2|SM 18:1;O2/25:1		21.09		level2	Propachlor OXA	12.51	6.181		level2			LPC 24:1/0:0	21.426	18.555
SM 32:0;O2	22.364	19.106		level2	PI 38:3|PI 18:0_20:3	24.0616	21.182		level2	Morphine	12.266	6.45		level2			FA 24:5	20.334	17.817
SM 34:3;O2|SM 18:1;O2/16:2		19.106		level2	PC O-38:1		21.215		level2	9-(2,3-Dihydroxypropoxy)-9-oxononanoic acid	10.384	6.464		level2			Cholest-5-En-3-One	22.402	19.244
FA 23:0	23.3	19.106		level2	PC O-40:2	23.9699	21.274		level2	3-Formylindole	12.672	6.516		level2			4-Cholestenone	22.402	19.244
LPA 19:0	21.962	19.11		level2	PC O-42:4		21.274		level2	Daidzein 4'-sulfate		6.796		level2			PC 34:7	18.45		1.307
PC 42:11	22.473	19.129		level2	PC O-44:5	24.1028	21.306		level2	Diethyl L-glutamate	12.646	6.807		level2			PI 34:2|PI 16:0_18:2		20.158	5.954
Hex2Cer 34:1;O2|Hex2Cer 18:1;O2/16:0	22.441	19.129		level2	PS 38:3|PS 18:0_20:3	23.9551	21.316		level2	Streptochlorin		6.943		level2			LPC 24:0/0:0	21.958	18.895	5.272
LPC O-26:1	22.38	19.143		level2	PEtOH 34:1|PEtOH 16:0_18:1		21.427		level2	isopentyl_2_furoate	13.076	7.009		level2			LPC O-24:2	21.365	18.512	5.358
FA 22:0	22.73	19.149		level2	N-Tetracosanoyl-4-sphingenyl-1-O-phosphorylcholine	23.364	21.462		level2	N-3-Hydroxyoctanoyl-L-homoserine lactone	3.954	7.143		level2			FA 22:0	22.73	19.149
PC 37:6	22.517	19.162		level2	SM 44:2;O2		21.498		level2	2-(2-Methoxyanilino)nicotinic acid	12.292	7.243		level2			CAR 26:1	21.608	18.711
SM 38:4;O2		19.179		level2	PE 40:5		21.515		level2	4-{[4-(Acetyloxy)benzoyl]amino}benzoic acid	12.32	7.398		level2			LPC O-24:1	21.798	18.799
FA 26:2	23.15	19.199		level2	PE 34:3	22.735	21.516		level2	trans-Traumatic acid	11.684	7.426		level2			FA 25:0;O	20.714	18.108
PC 39:7	19.134	19.2		level2	PI 36:1|PI 18:0_18:1	3.83817	21.538		level2	Sweroside		7.496		level2			FA 23:1	21.671	18.77
FA 24:1		19.224		level2	PE 36:5|PE 16:0_20:5	23.096	21.715		level2	6.beta.-Naltrexol	13.085	7.603		level2			1,3-Benzenediol, 5-(10-nonadecenyl)-, (Z)-	17.945	15.402
Cholest-5-En-3-One	22.402	19.244		level2	N-(1,3-dihydroxyoctadec-4-en-2-yl)tetradecanamide	23.398	21.787	1.024	level2	2,8-Dimethyl-2-(.beta.-carboxyethyl)-6-hydroxychroman	12.276	7.613		level2			PI 36:4|PI 16:0_20:4		20.136	5.904
4-Cholestenone	22.402	19.244		level2	PE 38:6|PE 18:2_20:4	23.206	21.893		level2	Bentazon	12.469	7.689		level2			CAR 26:0	22.138	19.007
PI 36:2	22.833	19.259		level2	PE 34:3|PE 16:0_18:3	23.4112	21.915		level2	Ser-Lys-Arg	4.43	7.763		level2			LPC O-24:0	22.359	19.116	5.329
PC O-34:4	22.728	19.268		level2	PE 36:4|PE 18:2_18:2	23.469	21.982		level2	5-hydroxy-7-(hydroxymethyl)-2-methyl-2-(5-oxooxolan-2-yl)-3H-chromen-4-one	12.595	7.861		level2			FA 24:1		19.224
SM 33:0;O2	22.673	19.273		level2	PE 38:3|PE 18:0_20:3		22.026		level2	Glu-Asp	13.219	7.917		level2			FA 24:2	21.748	18.88
FA 25:1	22.532	19.29		level2	PE 38:6|PE 18:1_20:5	23.48	22.048		level2	Methyl 2-(2-hydroxypropanoylamino)-3-methylbutanoate	12.543	7.931		level2			FA 23:0	23.3	19.106
1-Palmitoyl-2-myristoyl-sn-glycero-3-phosphocholine	22.717	19.304		level2	PA 36:2|PA 18:0_18:2	23.5581	22.136		level2	Farnesylthiosalicylamide	12.568	7.976		level2			Docosanamide	21.67	18.751
PC 32:3	22.049	19.31		level2	PC O-42:2		22.152		level2	Dianix Yellow 6G SL-FS	12.306	7.978		level2			PI 36:4	22.206
1-Palmitoyl-2-docosahexaenoyl-sn-glycero-3-phosphocholine	22.823	19.323		level2	(+)-.gamma.-Tocopherol	22.583	22.349		level2	2-(1-Pyrrolidinylcarbonyl)benzoic acid	12.5527	7.986		level2			FA 26:0;O	21.076	18.381
PC 38:6	22.823	19.323		level2	FA 28:4	22.583	22.349		level2	Ambroxol	12.701	8.001		level2			LPC O-26:2	21.92	18.887
PE P-36:5|PE P-16:0_20:5	22.833	19.326		level2	2-Docosahexaenoyl-1-palmitoyl-sn-glycero-3-phosphoethanolamine	22.849	22.446	2.467	level2	isoliquiritigenin	12.733	8.187		level2			(+)-.gamma.-Tocopherol	22.563	22.421
FA 24:0	23.91	19.371		level2	2-Arachidonoyl-1-palmitoyl-sn-glycero-3-phosphoethanolamine	22.963	22.607		level2	Dihydrodaidzein	12.733	8.187		level2			SM 31:1;O2	21.81	18.803
PC O-36:5|PC O-16:2_20:3	22.7569	19.39		level2	PE 36:4|PE 16:0_20:4	21.074	22.611	2.775	level2	2-Amino-2'-deoxyadenosine	12.958	8.187		level2			FA 24:0	23.91	19.371
PC O-35:4	23.003	19.424		level2	PE 40:7	21.16	22.844		level2	1-Propanone, 1-(1,3-benzodioxol-5-yl)-2-(dimethylamino)-		8.24		level2			LPC O-26:1	22.38	19.143
SM 40:4;O2	23.109	19.471		level2	Phthalic acid	24.13	22.959		level2	2-(Ethylsulfonyl)benzoic acid	12.692	8.242		level2			SM 32:2;O2|SM 18:2;O2/14:0	21.6	18.69
PC O-33:2	23.13	19.495		level2	2-Methylpyrrolidine	4.728	22.965		level2	Amfonelic acid	12.835	8.254		level2			Tri-2-ethylhexyl trimellitate	22.717
SM 37:4;O2		19.496		level2	8,11-Eicosadiynoic acid	19.11	23.06		level2	{4-[(Cyclopropylcarbonyl)amino]phenyl}acetic acid	12.517	8.291		level2			PI 38:5|PI 18:1_20:4			5.879
PC O-32:2	20.242	19.516		level2	FA 24:5	20.188		1.002	level2	AZELAIC ACID	12.912	8.462		level2			PI 36:2|PI 18:0_18:2	3.827	21.05	5.937
PC O-38:8|PC O-18:3_20:5	23.18	19.533		level2	Cer 38:2;O2|Cer 18:2;O2/20:0	23.928		1.007	level2	Artesunate		8.49		level2			PI 36:2	22.833	19.259
PC O-30:0	23.199	19.537		level2	7-Oxocholesterol	21.018		1.024	level2	3-Deazaneplanocin A	12.813	8.595		level2			FA 25:1	22.532	19.29
PC O-35:8	18.829	19.548		level2	NAE 18:0	20.426		1.06	level2	Ecgonine-methyl-ester (EME)	13.116	8.737		level2			(+)-.alpha.-Tocopherol	22.584	18.696
1-O-Hexadecyl-2-O-(4Z,7Z,10Z,13Z,16Z,19Z-docosahexaenoyl)-sn-glyceryl-3-phosphorylcholine	23.0694	19.575		level2	PG 34:2|PG 16:1_18:1	23.392		1.136	level2	18-hydroxycortisol	12.894	8.775		level2			CerP 32:1;O2	22.682	21.326
FA 26:1	23.04	19.58		level2	1-Oleoyl-2-myristoyl-sn-glycero-3-phosphocholine	22.87		1.153	level2	N6-Py-THF-dAdo		8.78		level2			SM 34:0;O2	22.258	19.073
1-Hexadecyl-2-(5Z,8Z,11Z,14Z-eicosatetraenoyl)-sn-glycero-3-phosphocholine	23.427	19.624		level2	(3.beta.)-Allopregnanolone sulfate	14.561		1.256	level2	2-(3,4-Dichlorophenyl)-N-methyl-N-[(1R,2R)-2-pyrrolidinocyclohexyl]acetamide	14.361	8.85		level2			SM 32:1;O2|SM 16:1;O2/16:0	22.123
PC O-37:5	23.6244	19.659		level2	1,11-Undecanedicarboxylic acid	12.267		1.316	level2	2H-Pyran-2-one, tetrahydro-4-hydroxy-6-pentyl-	12.826	8.962		level2			FA 26:2	23.15	19.199
PA 34:2|PA 16:0_18:2		19.662		level2	Biliverdin	15.862		1.43	level2	2',4'-Dihydroxyflavone	12.384	9.011		level2			.alpha.-Tocopheryl acetate	23.94
FA 25:0	24	19.682		level2	PC 33:2	22.708		1.458	level2	Glycitein	12.98	9.101		level2			FA 25:0	24	19.682
PC 42:7	23.656	19.699		level2	PC 34:4|PC 17:2_17:2			1.465	level2	13,14-Dihydro-15-ketotetranorprostaglandin F1.beta.	12.533	9.136		level2			SM 33:2;O2|SM 16:1;O2/17:1	21.9827	18.873
PC 32:0	23.511	19.699		level2	PC 30:1	22.26		1.472	level2	(E)-2-(hydroxymethyl)-3-[3-(hydroxymethyl)-6-propan-2-ylcyclohex-2-en-1-yl]prop-2-enoic acid	12.658	9.215		level2			BA 24:1;O4;G;S		10.622	6.338
PC O-40:6	23.7098	19.722		level2	PC 37:5	22.733		1.487	level2	3-oxo-C12 homoserine lactone	12.933	9.22		level2			SM 33:2;O2	21.954
2-Oleoyl-1-palmitoyl-sn-glycero-3-phosphocholine	23.626	19.731		level2	DL-2-Hydroxyvaleric acid sodium salt hydrate			1.923	level2	Cyclopentanehexanoic acid, 2-[(2Z)-4-carboxy-2-buten-1-yl]-3,5-dihydroxy-.gamma.-oxo-, (1R,2R,3S,5S)-	10.387	9.225		level2			1-Stearoyl-2-arachidonoyl-sn-glycero-3-phospho-(1'-myo-inositol)	22.758	19.216	5.824
1-Palmitoyl-3-oleoyl-sn-glycero-2-phosphoethanolamine	17.393	19.748		level2	(3-Nitrophenyl)methanamine	10.36		2.01	level2	Triethylcitrate	13.17	9.358		level2			SM 34:3;O2|SM 18:1;O2/16:2		19.106
SM 38:2;O2|SM 18:2;O2/20:0	23.637	19.748		level2	2-Methyl-4-nitroaniline	10.36		2.171	level2	GLUCURONOLACTONE	12.84	9.372		level2			PI 38:4|PI 18:0_20:4	3.79	20.99	5.874
PC O-37:4	23.853	19.827		level2	Methyl morpholine-3-carboxylate			2.255	level2	Rivaroxaban	13.018	9.373		level2			PI 38:4	22.69		5.831
PC O-41:11	23.857	19.853		level2	L-beta-homomethionine-HCl	4.662		2.401	level2	4,4'-Sulfonyldiphenol	12.836	9.414		level2			FA 26:1	23.04	19.58
SM 36:0;O2	23.877	19.888		level2	1-Stearoyl-2-arachidonyl-sn-glycero-3-phosphocholine	23.396		2.473	level2	Quercetin-3,7,3',4'-tetramethyl ether	13.382	9.829		level2			SM 34:3;O2	21.819
PE P-34:1|PE P-16:0_18:1		19.943		level2	Docosan-1-amine	20.8696		2.526	level2	Urobilin	12.918	9.844		level2			FA 28:4	22.563	22.421
PC 40:5	24.0524	19.948		level2	2-HYDROXYBUTYRIC ACID	10.35		2.533	level2	Pestalotin	13.496	9.985		level2			SM 33:1;O2|SM 17:1;O2/16:0	22.424	19.138	5.3
PC O-40:6|PC O-22:6_18:0	23.8629	19.95		level2	PE 36:5	22.5318		2.568	level2	3-hydroxy-C12 homoserine lactone	13.095	10.116		level2			FA 26:0	23.95	20.66
PE P-38:4|PE P-18:0_20:4	24.0132	19.964		level2	Methyl 2-(2-hydroxypropanoylamino)-3-methylbutanoate	11.86		2.784	level2	Tolfenamic acid	13.772	10.163		level2			CerP 34:2;O2	23.258	21.66
PC O-42:7	24.05	19.977		level2	3-Hydroxylup-20(29)-ene-23,27,28-trioic acid	17.765		2.789	level2	Estrone glucuronide	12.872	10.25		level2			SM 34:2;O2	3.767		5.292
DG 34:2|DG 16:0_18:2	23.9496	19.986		level2	Vitamin C	5.202		2.861	level2	Corticosterone		10.308		level2			PE 30:0|PE 15:0_15:0	22.778	19.315	4.62
1-Linoleoyl-2-oleoyl-rac-glycerol	24.1111	20.018		level2	1-Stearoyl-2-myristoyl-sn-glycero-3-phosphocholine	23.8064		2.981	level2	ONONETIN	12.98	10.514		level2			PC 30:0	22.8598		4.707
1-Hexadecyl-2-(9Z-octadecenoyl)-sn-glycero-3-phosphocholine	3.672	20.018		level2	2-[(Dimethylamino)methyl]cyclohexanone	3.69		3.253	level2	Chenodeoxycholic acid 24-acyl-.beta.-D-glucuronide		10.555		level2			1-Palmitoyl-2-myristoyl-sn-glycero-3-phosphocholine	22.717	19.304
DG 36:3|DG 18:1_18:2	24.088	20.045		level2	CAR 20:2	19.497		3.267	level2	Bufexamac	13.103	10.568		level2			PC 32:3	22.049	19.31
PE P-36:2|PE P-18:1_18:1	24.0829	20.056		level2	CAR 18:3	18.125		3.447	level2	Phytosphingosine 1-phosphate	13.5032	10.592		level2			SM 35:2;O2	22.544	19.187	5.278
PC 37:2	3.67	20.074		level2	trans-Urocanic acid; LC-tDDA; CE10	3.68		3.586	level2	Phomalone	13.754	10.634		level2			SM 32:0;O2	22.364	19.106
PC O-40:5	20.0448	20.096		level2	D(-)-Fructose	8.4799		3.712	level2	2,7,8-Trimethyl-2-(.beta.-carboxyethyl)-6-hydroxychroman	12.512	10.634		level2			SM 36:3;O2	22.3621	19.095
SM 38:1;O2|SM 18:1;O2/20:0	19.9828	20.156		level2	PE O-39:5	23.4192		3.801	level2	Hirsutine	13.955	11.006		level2			SM 37:4;O2		19.496
PC O-42:6	20.8798	20.177		level2	2-Arachidonoyl-1-stearoyl-sn-glycero-3-phosphoethanolamine			4.289	level2	16.beta.-Hydroxyfurazabol	13.946	11.006		level2			1,2-Dipalmitoleoyl-sn-glycero-3-phosphocholine	22.403	19.116	4.408
1-Octadecanoyl-2-octadecenoyl-sn-glycero-3-phosphocholine	20.611	20.204		level2	SUCCINIC ACID	10.35		4.331	level2	Benzenehexanamide, .beta.-hydroxy-N-[1-(hydroxymethyl)-3-methylbutyl]-.delta.-oxo-	14.176	11.188		level2			SM 35:1;O2	23.192	19.496	5.278
PC O-41:10		20.204		level2	PC O-36:5	23.2403		4.441	level2	Dipivefrine	14.113	11.406		level2			PC O-35:9	19.769	17.045
SM 42:3;O2|SM 27:2;O2/15:1	20.7898	20.252		level2	1-O-Hexadecyl-2-O-(4Z,7Z,10Z,13Z,16Z,19Z-docosahexaenoyl)-sn-glyceryl-3-phosphorylcholine	23.322		4.469	level2	dA-ONE	14.581	11.554		level2			PC O-30:0	23.199	19.537
SM 44:4;O2|SM 20:1;O2/24:3	24.03	20.336		level2	PC 39:6	23.175		4.489	level2	Lys-Trp	13.702	11.738		level2			PC 33:3	22.33	19.073
SM 38:0;O2	21.362	20.383		level2	PC 35:3	22.843		4.581	level2	Triphenylphosphine oxide	14.454	11.764		level2			PC 32:1	22.865	19.352	4.408
SM 39:1;O2|SM 26:0;O2/13:1	21.5693	20.425		level2	1-(1Z-Octadecenyl)-2-(5Z,8Z,11Z,14Z-eicosatetraenoyl)-sn-glycero-3-phosphoethanolamine	24.0332		4.712	level2	1-(4-Isopropoxyphenyl)-3-(1-piperidinyl)-1-propanone	14.675	11.919		level2			1-Oleoyl-2-myristoyl-sn-glycero-3-phosphocholine	22.865	19.352	4.663
DG 34:1|DG 16:0_18:1	21.403	20.428		level2	1-Palmitoyl-2-thiopalmitoyl phosphatidylcholine			4.719	level2	FA 18:2+2O	14.233	11.952		level2			SM 34:2;O2|SM 18:2;O2/16:0	22.233	19.029
PC 17:0-20:3-d5_ISTD	21.7056	20.469		level2	PE 37:4	23.0586		4.796	level2	Diethyl 5,5'-methylenebis(4-ethyl-3-methyl-1H-pyrrole-2-carboxylate)	14.042	12.227		level2			N-Palmitoyl-D-sphingosine	22.94	19.427
PC O-44:7	22.134	20.485		level2	PE 36:5|PE 16:1_20:4	22.5		4.817	level2	5,9-dimethyltetracyclo[11.2.1.0??,?????.0???,???]hexadecane-5,14-dicarboxylic acid	14.6	12.495		level2			SM 33:0;O2	22.673	19.273
DG 36:2|DG 18:1_18:1	21.7534	20.49		level2	PE P-32:1|PE P-16:0_16:1	23.1897		4.831	level2	5.beta.-Androstan-3.alpha.-ol-17-one sulfate	14.602	12.533		level2			PC O-35:8	18.829	19.548
SM 43:5;O2		20.49		level2	PE 35:2|PE 17:0_18:2	23.442		4.882	level2	(-)-Nuciferine	15.105	12.583		level2			1-Stearoyl-2-myristoyl-sn-glycero-3-phosphocholine			1.456
SM 41:2;O2|SM 18:2;O2/23:0	21.871	20.49		level2	N-Acetyl-L-alanine	3.88		4.916	level2	N-(3-Hydroxyphenyl)-2-(4-isobutylphenyl)propanamide	15.115	12.775		level2			PC 34:4	22.844	19.056
PC O-36:1	22.2145	20.564		level2	NAGly 21:0;O	19.5		4.949	level2	Myricanol	15.397	12.821		level2			PC 36:7	22.304	19.06
PC O-46:8	22.462	20.582		level2	SM 42:4;O2	23.8118		4.994	level2	cis-4,10,13,16-Docosatetraenoic acid		12.988		level2			PC 32:0	23.511	19.699
PC O-40:4	22.21	20.603		level2	SM 42:3;O2	21.5388		4.994	level2	[2-[4-Methyl-2-(2-methylpropanoyloxy)phenyl]oxiran-2-yl]methyl 2-methylpropanoate	15.7679	13.063		level2			SM 38:4;O2		19.179
SM 42:2;O2	22.5766	20.625		level2	SM 38:2;O2	23.676		5.265	level2	1-Pyrrolidineheptanoic acid, 2-(3-hydroxyoctyl)-5-oxo-	15.816	13.225		level2			SM 34:1;O2|SM 18:1;O2/16:0	22.8746	19.31	5.285
PC O-42:5	22.473	20.634		level2	SM 41:2;O2	21.7048		5.265	level2	5-[2-(furan-3-yl)ethyl]-8a-(hydroxymethyl)-5,6-dimethyl-3,4,4a,6,7,8-hexahydronaphthalene-1-carboxylic acid	14.873	13.231		level2			PC O-32:2	20.242	19.516
FA 26:0	23.95	20.66		level2	SM 40:2;O2	20.801		5.265	level2	Lauryldiethanolamine	16.002	13.558		level2			PC 35:5|PC 15:1_20:4	23.061
SM 39:0;O2	22.331	20.678		level2	SM 38:1;O2	20.594		5.286	level2	Artemisinin	16.238	13.662		level2			PC 34:3	23.511	18.468
PC O-38:2	22.4072	20.709		level2	SM 36:2;O2|SM 18:1;O2/18:1	22.8264		5.286	level2	Lauryldimethylamine Oxide	16.22	13.779		level2			DG 34:2|DG 16:0_18:2	23.9496	19.986
PC O-44:6	22.785	20.731		level2	2-Methylbutyryl-L-carnitine	3.886		5.297	level2	3,5-Di-tert-butyl-2-hydroxybenzaldehyde	22.1994	13.904		level2			PC 33:1	23.215	19.537	1.45
N-Docosanoyl-4-sphingenyl-1-O-phosphorylcholine	22.495	20.753		level2	SM 35:1;O2			5.307	level2	[6]-Shogaol	16.532	13.969		level2			PA 34:2|PA 16:0_18:2		19.662
SM 42:2;O2|SM 18:1;O2/24:1	22.625	20.774		level2	SM 36:1;O2	23.5528		5.307	level2	Octanediamide, N1-hydroxy-N8-[4-[4-[(1-oxo-5-hexyn-1-yl)amino]benzoyl]phenyl]-	17.094	14.555		level2			PE 34:2|PE 16:0_18:2	23.056	19.459	4.861
PC O-42:4	24.0163	20.85		level2	SM 33:1;O2|SM 17:1;O2/16:0	22.4654		5.327	level2	Benzyl-butyl-phthalate	17.13	14.584		level2			SM 34:0;O2	23.04
SM 44:3;O2|SM 23:3;O2/21:0		20.855		level2	SM 32:1;O2|SM 16:1;O2/16:0	22.128		5.349	level2	2-(3-Hexyl-4-methyl-2,5-dioxopyrrol-1-yl)-3-methylpentanoic acid	17.214	14.648		level2			PC O-32:1	23.347	19.598	4.62
SM 40:0;O2	23.182	21.031		level2	SM 42:1;O2	21.907		5.415	level2	Monomethyl phthalate	17.22	14.668		level2			PC O-32:1|PC O-16:1_16:0	23.907
SM 42:1;O2|SM 25:1;O2/17:0	23.2601	21.069		level2	O6-MeG	3.958		5.423	level2	.beta.-Estradiol	17.366	14.79		level2			DG 34:1|DG 16:0_18:1	21.403	20.428
SM 43:2;O2	23.485	21.126		level2	1-Palmitoyl-2-glutaryl phosphatidylcholine	19.397		5.503	level2	zearalenol	16.519	14.794		level2			PC O-34:4	22.728	19.268
PC O-46:7	23.787	21.129		level2	8-Acetamido-2-methyl-7-oxononanoic acid	3.93		5.544	level2	1,3-Benzenediol, 5-(10-nonadecenyl)-, (Z)-		15.413		level2			PC 37:7|PC 15:1_22:6	22.934
SM 42:1;O2|SM 24:1;O2/18:0	24.0974	21.299		level2	N-Benzoyl-N'-(4-methylphenyl)thiourea	3.994		5.546	level2	Acetyl tributyl citrate	18.0558	15.486		level2			SM 35:1;O2|SM 18:1;O2/17:0	23.098
CerP 32:1;O2	22.682	21.326		level2	2-Amino-2-methyl-1-propanol	4.38		5.634	level2	1-Heptadecanoyl-sn-glycero-3-phosphocholine	19.835	17.15		level2			PC O-37:9|PC O-18:4_19:5	23.368
PC O-44:5	24.0271	21.327		level2	2-(4-Amino-1-piperidinyl)cyclopentanol	3.914		5.722	level2	Perindopril	12.657	17.274		level2			PC O-33:2	23.13	19.495
PC O-46:6		21.438		level2	LPE 18:3	19.048		5.737	level2	Abietic acid	18.413	17.637		level2			Palmitoyleicosapentaenoyl phosphatidylcholine	22.555	19.189	3.996
PC 38:0	24.0394	21.472		level2	5-AMINOIMIDAZOLE-4-CARBOXAMIDE-1-BETA-RIBOFURANOSIDE	4.15		5.74	level2	(2E,4E,12Z)-N-(2-methylpropyl)octadeca-2,4,12-trienamide	20.412	17.671		level2			1-Palmitoyl-3-oleoyl-sn-glycero-2-phosphoethanolamine	17.393	19.748
SM 42:1;O2|SM 18:1;O2/24:0	23.807	21.481		level2	PS 38:4	22.958		5.76	level2	9S,11R,15S-Trihydroxy-20a,20b-dihomo-5Z,13E-prostadienoic acid	20.412	17.76		level2			PC O-32:0	24.1482	19.986	4.685
CerP 34:2;O2	23.258	21.66		level2	PS 38:6	22.282		5.774	level2	2,3-Dihydroxypropyl octadecanoate	20.997	17.922		level2			SM 38:2;O2	23.631		5.242
SM 43:1;O2		21.73		level2	5-OHMe-Ur	4.491		5.799	level2	Pipericine	20.765	18.01		level2			PE 36:4|PE 18:2_18:2	23.805	19.395	4.787
(+)-.gamma.-Tocopherol	22.563	22.421		level2	PS 36:2	23.046		5.803	level2	N-Cyclohexanecarbonyltetradecylamine	20.881	18.119		level2			2-Arachidonoyl-1-palmitoyl-sn-glycero-3-phosphoethanolamine	22.945	19.395	4.828
FA 28:4	22.563	22.421		level2	PS 36:1	3.775		5.825	level2	Palmitoyl sphingomyelin	22.731	19.323		level2			PE 36:4|PE 16:0_20:4	21.755	22.92	4.828
FA 16:0	19.55	23.008		level2	2-Oleoyl-1-palmitoyl-sn-glycero-3-phosphoserine	22.8911		5.825	level2	1,2-Dipentadecanoyl-sn-glycero-3-phosphoethanolamine	22.751	19.333		level2			2-Oleoyl-1-palmitoyl-sn-glycero-3-phosphocholine	23.626	19.731
[4-(2-Fluorobenzyl)piperazin-1-yl](2-fluorophenyl)methanone	4.896			level2	5-Amino-N-(4-chlorophenyl)-3-methyl-4-isoxazolecarboxamide	3.839		5.854	level2	1-Palmitoyl-2-linoleoyl-sn-glycero-3-phosphocholine	23.031	19.46		level2			N-Oleoyl-D-erythro-sphingosylphosphorylcholine	22.865	19.357	5.264
SM 43:4;O2	23.331			level2	PI 34:2	22.26		5.925	level2	N-Docosanoyl-4-sphingenyl-1-O-phosphorylcholine	22.437	20.745		level2			PA 36:4|PA 18:2_18:2	22.356
Tris(1,3-dichlorisopropyl)phosphate (TDCPP)	16.298			level2	15-Ethenyl-2-hydroxy-9,11,12a,13-tetramethyl-2,3,8b,9,10,11,12,12a,12b,15,15a,15b-dodecahydro-1aH-2,16a-(epiminomethano)-4,7-ethenofluoreno[9,1-bc]oxireno[f]oxacyclotridecine-16,17(8aH)-dione	3.951		6.183	level2	4-Chloromethyl-2-(4-fluorophenyl)-5-methyloxazole	5.95			level2			PC O-34:3|PC O-16:1_18:2	23.384	19.603	3.975
SM 33:2;O2	21.954			level2	2-[7-Hydroxy-5-methoxy-3-oxo-6-[(2E,6Z)-3,7,11-trimethyldodeca-2,6,10-trienoxy]-1H-isoindol-2-yl]pentanedioic acid	3.947		6.283	level2	2-Methylthioadenosine; AIF; 0eV; MS2Dec	4.419			level2			PC O-34:3	23.065	19.986	4.557
LPA 17:0	20.987			level2	N-Methylhistidine	7.911		6.363	level2	(5-Oxooxolan-3-yl)methyl hexanoate	13.012			level2			PC 37:6	22.517	19.162
PC O-40:9	23.336			level2	LPS 20:4	18.6764		6.422	level2	Tris(1,3-dichlorisopropyl)phosphate (TDCPP)	16.286			level2			SM 40:5;O2	23.637
LPC 15:2	3.805			level2	3-(2-Hydroxyethyl)guanidine	4.7074		6.474	level2	Butyl 2-ethylhexyl phthalate	16.813			level2			PC 36:4|PC 18:2_18:2	22.668	19.237	4.536
FA 19:2	19.719			level2	5-Aminovaleric acid betaine	4.43		6.491	level2	4-tert-Butyl-N-(2-methyl-2H-tetraazol-5-yl)benzamide	4.481			level2			DG 36:3|DG 18:1_18:2	24.088	20.045
ST 27:1;O;S	22.05			level2	NAE 6:0	4.43		6.491	level2	[(3,4-Dichlorophenyl)sulfonyl]acetic acid	4.891			level2			1-Linoleoyl-2-oleoyl-rac-glycerol	24.1111	20.018
Arachidonoyl amide	19.901			level2	2-(Diethylamino)acetic acid	4.728		6.553	level2	2,2'-[(Phosphonomethyl)imino]diacetic acid	4.682			level2			SM 38:1;O2	20.073
PC O-34:0	21.871			level2	LPI 18:0	20.2116		6.578	level2	4-Bromo-3-(4-fluorophenyl)-1H-pyrazole	5.285			level2			PC O-35:4	23.003	19.424
4-[(Phenylcarbonyl)amino]butanoic acid	3.762			level2	Phe-Tyr	4.64		6.68	level2	.beta.-Glutamic acid	4.709			level2			PC 38:7	22.657		4.522
N-Isobutyl-3-methylbutanamide	14.312			level2	2-Oxopentanedioic acid	4.695		6.759	level2	E-N-Deoxyfructosyllysine	8.859			level2			PE 36:3|PE 18:1_18:2	23.167	19.496	4.869
1-(2,4-Difluorophenyl)-1H-pyrrole-2-carbaldehyde	5.005			level2	4-[3-(Trifluoromethyl)phenyl]-4-piperidinol	4.612		6.768	level2	2-(Methylamino)-1-(morpholin-4-yl)ethan-1-one	4.663			level2			SM 36:1;O2|SM 18:1;O2/18:0	23.511
SM 42:4;O2	22.496			level2	Tyr-Leu	4.659		6.777	level2	Malic acid	4.699			level2			PA 36:3|PA 18:1_18:2	21.969
Diethyl 5,5'-methylenebis(4-ethyl-3-methyl-1H-pyrrole-2-carboxylate)	20.368			level2	Dethiosecoemestrin	4.76		6.831	level2	2-(4-Nitrobenzoyl)-N-phenylhydrazinecarboxamide	4.625			level2			PC 34:2	23.046		1.442
PC O-32:1|PC O-16:1_16:0	23.907			level2	Methyl 5-bromo-2-(methylamino)benzoate	4.776		6.857	level2	N-Methyl-L-threonine	6.77			level2			PC O-34:2	23.532	19.688	4.599
Miconazole	9.063			level2	2,4-diacetylphloroglucinol	4.736		6.86	level2	2-(2,6-Dimethylphenoxy)-N-(2-isopropylphenyl)acetamide	14.411			level2			PE P-34:2|PE P-16:0_18:2	23.405	19.619	4.765
1,3,7-Trimethyluric acid; LC-tDDA; CE10	4.333			level2	3-(2-Hydroxy-4-methoxy-6-methylphenoxy)-5-methylpyrocatechol			6.918	level2	Methyl 5-ethoxy-3-formyl-1H-indole-2-carboxylate	11.905			level2			SM 40:4;O2	23.109	19.471
N-Methyl-L-threonine	7.409			level2	Triciribine	4.862		6.925	level2	Triethylene glycol monobutyl ether	12.92			level2			PE 38:6|PE 16:0_22:6	21.072		4.765
9Z,11E,13E-Octadecatrienoic acid	21.007			level2	Ilicicolin B	4.966		6.931	level2	Tricin methyl ether	11.88			level2			PE 38:6	22.833		4.765
PC O-40:8	23.511			level2	Piperidine	4.72		6.991	level2	1-O-(3-Hydroxy-4,5-dimethoxybenzoyl)hexopyranose	3.725			level2			DG 36:2|DG 18:1_18:1	21.7534	20.49
Pesticide5_Tricyclazole_C9H7N3S_Beam	12.554			level2	Glufosinate	4.885		7.025	level2	Midazolam	6.554			level2			PC O-36:5|PC O-16:2_20:3	22.7569	19.39
1,2-Dihexanoyl-sn-glycerol	14.913			level2	Cyclohexanamine	3.819		7.052	level2	4',5,7-Trihydroxy 3,3',6,8-tetramethoxyflavone	11.793			level2			PE P-36:5|PE P-16:0_20:5	22.833	19.326
4-Morpholinopropanesulfonic acid	4.64			level2	D-(+)-Arabitol	4.654		7.165	level2	Tri(2-furyl)phosphine	4.698			level2			PC 38:6	22.823	19.323
Neopentyl glycol dibenzoate	14.203			level2	L-Isoleucine	4.80356		7.167	level2	ERUCIC ACID	21.727			level2			1-Palmitoyl-2-docosahexaenoyl-sn-glycero-3-phosphocholine	22.823	19.323
SM 39:1;O2|SM 16:1;O2/23:0	21.511			level2	Crotonoside	4.833		7.17	level2	Asp-Ala	8.307			level2			PE 36:2|PE 18:1_18:1	23.8183		4.824
1-Stearoyl-2-docosahexaenoyl-sn-glycero-3-phosphocholine	23.558			level2	N-ACETYL-D-GLUCOSAMINE	4.778		7.202	level2	5-Methyluridine	6.229			level2			PE 36:2|PE 18:0_18:2	23.288		4.873
LPA 21:1	21.962			level2	N-(2-Chlorobenzyl)-7H-purin-6-amine	4.638		7.269	level2	1,11-Undecanedicarboxylic acid	12.287			level2			SM 36:0;O2	23.877	19.888
Carbamazepine	12.765			level2	Ile-Pro			7.292	level2	Arachidonoyl-N,N-dimethylamide	20.58			level2			PC O-38:8|PC O-18:3_20:5	23.18	19.533
(9Z)-5,8,11-Trihydroxyoctadec-9-enoic acid	13.474			level2	Orotic acid	4.86		7.372	level2	7-Hydroxy-3-phenoxy-2-(trifluoromethyl)-4H-chromen-4-one	12.501			level2			1-Hexadecyl-2-(9Z-octadecenoyl)-sn-glycero-3-phosphocholine	3.672	20.018
Diethyl (4-fluorobenzyl)phosphonate	13.381			level2	N-Acetyl-D-galactosaminitol	4.799		7.374	level2	2',2'-Difluoro-2'-deoxyuridine	13.905			level2			PE P-34:1|PE P-16:0_18:1		19.943
SM 40:2;O2|SM 16:1;O2/24:1	20.127			level2	Trigonelline	5.19338		7.412	level2	5-Chloro-2-hydroxy-3-iodobenzoic acid	4.836			level2			SM 40:3;O2|SM 18:1;O2/22:2	23.7691		5.234
2'-O-Methyladenosine	7.904			level2	2-Iminobiotin	6.391		7.424	level2	Tetrahydro-L-biopterin	7.326			level2			PC 36:2	23.851	19.847	4.599
Praziquantel	8.745			level2	Pyrantel	6.257		7.486	level2	N8-Acetylspermidine	7.923			level2			SM 39:1;O2	21.4395		5.242
17alpha-Methyltestosterone	20.066			level2	Val-Pro	4.939		7.633	level2	Maleamic acid	3.878			level2			SM 39:1;O2|SM 26:0;O2/13:1	21.5693	20.425
SM 38:1;O2	20.073			level2	Betonicine			7.636	level2	[(2-Bromobenzoyl)amino]acetic acid	9.06			level2			SM 39:1;O2|SM 16:1;O2/23:0	21.511
5-Benzyl-3-phenyl-2-thioxo-4-imidazolidinone	14.016			level2	Oxolinic acid	4.74		7.653	level2	2-Imino-4-methylpiperidine	3.746			level2			PC O-36:4	23.4511		4.515
Isophorone	13.348			level2	Adipoyl-L-carnitine	4.723		7.748	level2	2-(4-Chlorobenzoyl)-N-ethylhydrazinecarbothioamide	6.654			level2			1-Hexadecyl-2-(5Z,8Z,11Z,14Z-eicosatetraenoyl)-sn-glycero-3-phosphocholine	23.427	19.624
Triciribine	4.788			level2	NAE 5:0	4.75882		7.75	level2	N-Butyl-1-phenyl-1H-pyrazolo[3,4-d]pyrimidin-4-amine	13.872			level2			PE P-36:4|PE P-16:0_20:4	23.278	19.548	4.685
Leu-Ala	4.824			level2	Ethyl 3-amino-4-(methylsulfonyl)-5-(methylthio)thiophene-2-carboxylate	5.422		7.789	level2	2,3-DIHYDROXYBENZOIC ACID	3.743			level2			PC 39:7	19.134	19.2
ALPHA-HYDROXYGLUTARIC ACID	4.685			level2	ARABINOSE	4.04		7.824	level2	Clovamide	8.816			level2			PC 38:5	23.051		3.793
pGlu-Glu-Pro-amide	4.857			level2	9-Fluorenone	5.683		7.824	level2	2-Oxiraneoctanoic acid, .eta.-hydroxy-3-octyl-	14.814			level2			PC O-38:7	23.427	19.455	4.386
Glufosinate	4.821			level2	GLYCERIC ACID	4.75		7.85	level2	(.alpha.S,1S,2R)-.alpha.-Amino-2-carboxycyclopropaneacetic acid	4.607			level2			PC O-38:7|PC O-16:1_22:6	23.109
[(4-Chlorophenyl)sulfonyl]acetic acid	5.319			level2	Prolylalanine	6.779		7.908	level2	N-Acetyl-D-lactosamine	7.459			level2			PC O-34:0	21.871
2,4-Di-tert-butylphenol	18.608			level2	1,3-Dimethylimidazolidine-2,4-dione	6.90453		7.908	level2	Lys-Gly	8.631			level2			PC 17:0-20:3-d5_ISTD	21.7056	20.469
SM 43:5;O2|SM 24:3;O2/19:2	21.871			level2	Pro-Pro	6.772		7.934	level2	2,2'-(1H-1,2,4-Triazole-3,5-diyl)diphenol	6.031			level2			SM 40:2;O2	20.6586	20.22	5.235
cis-5-Dodecenoic acid	16.017			level2	(5Z)-5-(2-Hydroxybenzylidene)-1,3-thiazolidine-2,4-dione	6.563		7.98	level2	3-(5,6-Dihydroxyheptyl)-4-methyl-2H-furan-5-one	12.905			level2			SM 40:2;O2|SM 16:1;O2/24:1	20.127
FA 17:0;O2	19.541			level2	Pendimethalin	6.456		7.99	level2	METHYL BETA-D-GALACTOSIDE	4.679			level2			PC O-37:5|PC O-15:1_22:4	21.5079		4.414
Isosibiricin	16.233			level2	Leu-Asp	6.83		8.076	level2	D-SEDOHEPTULOSE	4.304			level2			PC O-37:5	23.6244	19.659
PE 40:6	23.579			level2	Sarcosine			8.077	level2	Leu-Ala	6.256			level2			PC 40:8	22.462		4.465
Calusterone	20.769			level2	Leu-Asn	7.347		8.088	level2	ALPHA-HYDROXYGLUTARIC ACID	4.659			level2			1,2-Diarachidonoyl-sn-glycero-3-phosphocholine	22.462		4.465
isorhamnetin	8.852			level2	Ala-Pro	7.194		8.088	level2	[(4-Chlorophenyl)sulfonyl]acetic acid	5.17			level2			PE 38:4	23.7002		4.752
Idebenone	16.006			level2	Ser-Val	7.45		8.091	level2	Pentose-Hexose + C10H17	4.642			level2			PE 38:4|PE 18:0_20:4		20.73	4.796
(12Z)-9,10,11-Trihydroxyoctadec-12-enoic acid	14.022			level2	Met-Asp	7.705		8.224	level2	Phlorizin	4.723			level2			PE 38:4	23.74
SM 34:0;O2	23.04			level2	3-(Trifluoromethyl)cinnamic acid	6.179		8.23	level2	dG-C8-2,6-DMA	14.691			level2			1-Octadecanoyl-2-octadecenoyl-sn-glycero-3-phosphocholine	20.611	20.204
SM 40:5;O2	23.637			level2	N-epsilon-Formyl-L-lysine	7.33921		8.237	level2	2,3',4,5'-Tetramethoxystilbene	5.192			level2			SM 38:2;O2|SM 18:2;O2/20:0	23.637	19.748
2'-Deoxyuridine 5'-monophosphate	3.705			level2	Thr-Pro	7.31026		8.245	level2	1H-Pyrrole-3,4-dicarboxylic acid	4.648			level2			PC 42:11	22.473	19.129
Piperazine-2-carboxylic acid	8.881			level2	(.+/-.)-Clopidogrel	7.406		8.246	level2	N.alpha.-(tert-Butoxycarbonyl)-L-aspartic acid	4.615			level2			1-O-Hexadecyl-2-O-(4Z,7Z,10Z,13Z,16Z,19Z-docosahexaenoyl)-sn-glyceryl-3-phosphorylcholine	23.0694	19.575
Phencyclidine	14.538			level2	Pro-Gly	7.417		8.247	level2	Ethylenediaminetetraacetic acid	8.716			level2			PE P-38:6|PE P-16:0_22:6	23.135		4.663
SM 34:3;O2	21.819			level2	Sulfoacetic acid			8.26	level2	Clindamycin	3.964			level2			PC 37:2	3.67	20.074
Ethyl (4-amino-1-piperidinyl)acetate	12.769			level2	Pro-Gly-Pro	7.454		8.266	level2	Argininosuccinic acid	8.841			level2			PC O-41:11	23.857	19.853
Heptadecasphinganine	16.091			level2	Met-Gln	7.454		8.285	level2	5-(Ethoxymethyl)-2-methyl-4-pyrimidinamine	3.833			level2			PC O-37:4	23.853	19.827
Moroxydine	3.919			level2	L-.beta.-Homoglutamine	7.48325		8.333	level2	6,8-Dibromocoumarin-3-carboxylic acid	4.869			level2			PE P-37:4|PE P-17:0_20:4	23.678
1-[(4-Fluorophenyl)sulfonyl]piperazine	6.743			level2	Ala-Ala-Ala	7.454		8.334	level2	2,4-Dimethyl-6-nitrophenol	12.472			level2			SM 38:1;O2|SM 18:1;O2/20:0	19.9828	20.156
Tri-2-ethylhexyl trimellitate	22.717			level2	Tyr-Asp	7.85		8.342	level2	3a-hydroxy-3,5a,9-trimethyl-3,4,5,6,7,9b-hexahydrobenzo[g][1]benzofuran-2,8-dione	13.781			level2			PC O-40:9	23.336
CITRIC ACID	9.502			level2	Glu-Tyr	7.598		8.344	level2	Tri-2-ethylhexyl trimellitate	23.268			level2			PE P-36:2|PE P-18:0_18:2	24.1173		4.728
L-Valine, N-[(1-pentyl-1H-indazol-3-yl)carbonyl]-, methyl ester	12.77			level2	Cys-Gly	8.149		8.348	level2	3-(2-(.beta.-D-Glucopyranosyloxy)-4-methoxyphenyl)propanoic acid	3.745			level2			PE P-36:2|PE P-18:1_18:1	24.0829	20.056
Tripropylene glycol	12.071			level2	N-Methyl-DL-alanine	6.612		8.358	level2	Leu-Thr	8.575			level2			SM 42:4;O2	22.496
7.alpha.,24(S)-Dihydroxy-4-cholesten-3-one	18.381			level2	N-Methyl-L-threonine	7.423		8.359	level2	.beta.-D-Glucopyranosiduronic acid, 5-[3-(1-naphthalenylcarbonyl)-1H-indol-1-yl]pentyl	15.308			level2			PC 42:10	22.37	19.063
LPC O-18:1	3.683			level2	5-Hydroxymethyl-6-methyluracil	7.428		8.363	level2	Pro-Leu-Lys	8.276			level2			PE 40:6	23.579
2-{2-[2-(Acryloyloxy)-1-methylethoxy]-1-methylethoxy}-1-methylethyl acrylate	14.596			level2	2-Chlorobenzoate	6.219		8.373	level2	Leu-Asp-Lys	8.521			level2			PE 40:6|PE 18:0_22:6	22.14
SM 36:1;O2|SM 18:1;O2/18:0	23.511			level2	2,4-Thiazolidinedione, 5-[[4-[2-(2-thienyl)ethoxy]phenyl]methylene]-	4.68		8.375	level2	Iminodiacetic acid	6.221			level2			SM 41:2;O2	21.792		5.221
1-(5-Chloro-2-hydroxyphenyl)-3-(2-furyl)-1,3-propanedione	4.984			level2	(Z)-Pyriminobac-methyl	7.933		8.382	level2	[1-(4-methoxyanilino)-1-oxopropan-2-yl] 6-oxo-1-propylpyridazine-3-carboxylate	5.961			level2			PC O-38:5	23.521	19.659	3.673
PC O-38:7|PC O-16:1_22:6	23.109			level2	Putrescine	8.36		8.384	level2	9-methoxy-4,4-dimethyl-13-phenyl-6,14-dioxatetracyclo[8.4.0.0??,???.0??,???]tetradeca-1,7,9-trien-11-one	8.467			level2			PE P-38:5|PE P-18:1_20:4	23.384	19.861	4.686
N-Cyclohexanecarbonyltetradecylamine	20.894			level2	DL-2-Methylglutamic acid	7.516		8.421	level2	2,2',5'-Trihydroxychalcone	12.204			level2			PC O-41:10		20.204
Metribuzin-desamino	4.919			level2	Thymidine-5'-monophosphate	7.586		8.45	level2	Misonidazole	6.712			level2			PC 40:6	23.5475		4.472
8-Hydroxy-3-(7-hydroxyheptyl)-6-oxo-3,4-dihydroisochromene-7-carboxylic acid	13.732			level2	.beta.-L-Fucose 1-phosphate	8.392		8.454	level2	Phe-His	12.958			level2			1-Stearoyl-2-docosahexaenoyl-sn-glycero-3-phosphocholine	23.558
PA 36:3|PA 18:1_18:2	21.969			level2	Asp-Val	7.64277		8.458	level2	7-Hydroxy-4-methylcoumarin-3-acetic acid	12.54			level2			1-Docosahexaenoyl-2-stearoyl-sn-glycero-3-phosphocholine	23.193	19.68
PC O-40:7|PC O-18:1_22:6	23.9			level2	Pro-Glu			8.469	level2	Buflomedil	12.915			level2			SM 43:5;O2		20.49
LPI 18:0	20.41			level2	Thr-Ala	7.39359		8.494	level2	15-Ketobimatoprost	4.233			level2			SM 43:5;O2|SM 24:3;O2/19:2	21.871
PE 38:4	23.74			level2	Proline-hydroxyproline	7.589		8.523	level2	4-Methoxy-2-(trifluoromethoxy)benzoic acid	4.975			level2			SM 38:0;O2	21.362	20.383
2-Pentenedioic acid, 2-octyl-	12.086			level2	His-Met	7.606		8.535	level2	D-myo-Inositol-1,3-diphosphate	9.457			level2			PC O-40:8	23.511
(3S)-3-(2-methylpyrimidin-5-yl)-9-(5,6,7,8-tetrahydro-1,8-naphthyridin-2-yl)nonanoic acid	15.747			level2	Arg-Glu	8.794		8.535	level2	5-Chlorobenzotriazole	4.648			level2			PC O-36:1	22.2145	20.564
Alisol B acetate	20.062			level2	Pro-Asp	7.694		8.557	level2	9-(3-Deoxy-3-fluoro-.beta.-D-xylofuranosyl)adenine	8.208			level2			SM 42:3;O2	21.1833		5.038
Radiclonic acid	20.113			level2	N-Nitrosopyrrolidine (NPYR)	7.623		8.558	level2	p-Acetaminobenzoic acid	4.689			level2			SM 42:3;O2|SM 27:2;O2/15:1	20.7898	20.252
LPA 20:1	21.471			level2	Val-Asn	7.704		8.582	level2	Entecavir	8.182			level2			PE P-38:4|PE P-18:0_20:4	24.0132	19.964
PA 36:4|PA 18:2_18:2	22.356			level2	SN-GLYCERO-3-PHOSPHOCHOLINE	7.772		8.605	level2	3',4'-Dimethoxy-.alpha.-naphthoflavone	6.001			level2			1-(1Z-Octadecenyl)-2-(5Z,8Z,11Z,14Z-eicosatetraenoyl)-sn-glycero-3-phosphoethanolamine	24.0132		4.642
PC O-40:3	22.679			level2	Methyl 4-(trifluoromethyl)benzoylacetate	7.65		8.615	level2	2,6-Dioxo-4-piperidinecarboxylic acid	4.709			level2			PC 40:5	24.0524	19.948
Kifunensine	12.932			level2	2-[4-(Trifluoromethoxy)phenyl]cyclopropanecarboxylic acid	7.679		8.62	level2	N-(3-Bromo-4-methoxybenzoyl)-beta-alanine	3.751			level2			SM 43:4;O2	23.331
[2-[4-Methyl-2-(2-methylpropanoyloxy)phenyl]oxiran-2-yl]methyl 2-methylpropanoate	15.757			level2	Arg-Ile	7.933		8.658	level2	GLYCERIC ACID	4.74			level2			PC O-40:7|PC O-18:1_22:6	23.9
[6]-Shogaol	16.537			level2	Ala-Thr	7.673		8.678	level2	Junipediol A 8-glucoside	4.55			level2			PE P-40:7|PE P-18:1_22:6	23.236
Arg-Gln	12.139			level2	His-Val	7.69837		8.687	level2	Urolithin A	12.883			level2			1-(1Z-Octadecenyl)-2-(5Z,8Z,11Z,14Z-eicosatetraenoyl)-sn-glycero-3-phosphocholine	23.521		4.451
N.epsilon.-Methyl-L-lysine	8.365			level2	L-Asparagine	7.777		8.716	level2	6'-Sialyl-N-acetyllactosamine	8.648			level2			SM 42:2;O2	22.5766	20.625
3,4-Difluoro-L-phenylalanine	4.908			level2	Lys-Phe	7.977		8.729	level2	Aurapten	16.532			level2			PC O-42:10	23.363
1-Phenyl-1,2,3,4-tetrahydroisoquinoline	4.726			level2	Styrene	7.873		8.744	level2	L-Alanyl-L-norleucine	6.89			level2			SM 39:0;O2	22.331	20.678
1-Stearoyl-2-arachidonyl-sn-glycero-3-phosphocholine	23.417			level2	4-(Trifluoromethyl)benzylamine	7.92664		8.745	level2	Benzophenone	14.742			level2			PC 40:4	20.06	20.117	2.565
3-Amino-5,6-dimethyl-2-pyrazinecarboxylic acid	8.038			level2	Glu-Gly-Arg	7.931		8.759	level2	5-Chloro-2-(methylsulfanyl)-4-pyrimidinecarboxylic acid	11.358			level2			PC O-40:6	23.7098	19.722
PROPYLPARABEN	13.962			level2	4-AMINOBUTANOIC ACID	7.887		8.764	level2	raspberry ketone	13.126			level2			PC O-40:6|PC O-22:6_18:0	23.8629	19.95
Dihomo-.gamma.-linolenic acid methyl ester	20.988			level2	Febuxostat	7.864		8.765	level2	Mevalonic acid 5-pyrophosphate	8.892			level2			PC O-40:6	23.673
3-Sulfobenzoic acid	4.479			level2	Gln-Ala	7.82076		8.766	level2	Flavone base + 3O, O-HexA-HexA	8.021			level2			PC 43:9	22.403	19.085
Alpinetin	12.822			level2	Ile-His	7.923		8.805	level2	Hexaconazole	7.504			level2			SM 42:1;O2|SM 25:1;O2/17:0	23.2601	21.069
LPA 21:5	20.087			level2	N8-Acetylspermidine	8.005		8.806	level2	3-(Dimethylamino)propanohydrazide	6.318			level2			SM 42:1;O2|SM 24:1;O2/18:0	24.0974	21.299
SM 32:1;O2|SM 16:1;O2/16:0	22.123			level2	Thr-Gly	7.909		8.807	level2	(-)-Epinephrine	12.343			level2			PC 42:7	23.656	19.699
4-Hydroxyhippuric acid sulfate	4.436			level2	Thr-Thr	7.88		8.817	level2	2-(1-Methyl-1H-imidazol-5-yl)acetic acid	5.707			level2			PC 38:0	24.0394	21.472
Asn-Ser	8.5			level2	1,6-Bis-O-(3,4-dihydroxybenzoyl)-.beta.-D-glucopyranose	7.921		8.84	level2	Canrenone	19.317			level2			1-Stearoyl-2-arachidonyl-sn-glycero-3-phosphocholine	23.417
ARABINOSE	4.522			level2	Pro-Asn	7.953		8.847	level2	Hexanoylglycine	12.57			level2			N-Docosanoyl-4-sphingenyl-1-O-phosphorylcholine	22.495	20.753
Ergothioneine; LC-tDDA; CE10	6.839			level2	Cotinine N-.beta.-D-glucuronide	7.961		8.852	level2	2-Bromo-6-chlorobenzoic acid	8.295			level2			PC O-38:2	22.4072	20.709
Ser-Ala	8.88			level2	Phe-Lys	8.02993		8.856	level2	2-Amino-2-methyl-1,3-propanediol	4.501			level2			1-(1Z-Octadecenyl)-2-(4Z,7Z,10Z,13Z,16Z,19Z-docosahexaenoyl)-sn-glycero-3-phosphocholine	23.363		4.408
Hexaconazole	7.634			level2	Isomaltose	7.808		8.874	level2	3'-O-Methylguanosine	4.485			level2			SM 44:4;O2|SM 20:1;O2/24:3	24.03	20.336
LPA 12:0	17.936			level2	O-Succinyl-L-homoserine	7.988		8.905	level2	N5-(1-Iminoethyl)-L-ornithine	4.228			level2			SM 43:2;O2	23.485	21.126
LPC 15:1/0:0	3.774			level2	N-Acetylneuraminic acid	7.925		8.912	level2	2-Amino-4-nitrophenol	4.689			level2			PC O-40:5	20.0448	20.096
PE P-37:4|PE P-17:0_20:4	23.678			level2	D-Mannosamine	7.991		8.925	level2	Norvaline, 5-phosphono-	12.66			level2			SM 41:2;O2|SM 18:2;O2/23:0	21.871	20.49
Curvulin	12.658			level2	Leu-Arg	7.933		8.928	level2	5-Nitro-2-(2-pyridinyl)-1H-benzimidazole	3.734			level2			SM 40:0;O2	23.182	21.031
PE P-40:7|PE P-18:1_22:6	23.236			level2	Glu-Glu-Lys	8.086		8.955	level2	Blood Group H Disaccharide	7.864			level2			SM 44:3;O2|SM 23:3;O2/21:0		20.855
4-Isoxazolepropanoic acid, .alpha.-amino-2,3-dihydro-5-methyl-3-oxo-	4.891			level2	Sorbitol 6-phosphate	8.032		8.979	level2	9-(1,3-Dihydroxy-3-methylbutyl)-3a,6-dihydroxy-4-methoxy-3a,12a-dihydro-5H-furo[3',2':4,5]furo[3,2-b]xanthen-5-one	4.725			level2			SM 43:1;O2		21.73
(sec-Butylamino)(oxo)acetic acid	6.087			level2	Thr-Glu	8.094		9.001	level2	2-[2-(4-Heptylphenyl)ethyl]-6-hydroxybenzoic acid	19.664			level2			PC O-40:4	22.21	20.603
(2E)-3-(4-Bromothiophen-2-yl)prop-2-enoic acid	9.124			level2	Lys-Ile	8.25876		9.013	level2	1,3-Dihydroxyanthraquinone	8.471			level2			PC O-40:4|PC O-17:4_23:0	22.342
Desoxymethasone	18.539			level2	Leu-Lys	8.129		9.038	level2	Ectoine	6.512			level2			PC O-42:7	24.05	19.977
15-Ketoprostaglandin E1	16.972			level2	Gln-Thr	8.119		9.04	level2	.gamma.-L-Glutamyl-L-alanine	8.185			level2			SM 42:2;O2|SM 18:1;O2/24:1	22.625	20.774
PC O-40:4|PC O-17:4_23:0	22.342			level2	.gamma.-L-Glutamyl-L-alanine	7.969		9.04	level2	3-Dehydroquinic acid	4.477			level2			PC O-40:3	22.679
PC O-40:6	23.673			level2	Asp-Pro	8.16		9.089	level2	7,2'-Dimethoxyflavone	3.794			level2			PC O-42:6	20.8798	20.177
PC O-42:10	23.363			level2	4-Quinazolinamine, N-(3-bromophenyl)-6,7-dimethoxy-	5.073		9.097	level2	Pimonidazole	3.928			level2			SM 42:1;O2|SM 18:1;O2/24:0	23.807	21.481
PC 37:7|PC 15:1_22:6	22.934			level2	Ser-Thr	8.164		9.112	level2	(S)-3-Methyloxacyclotetradecan-2-one	15.158			level2			PC O-42:5	22.473	20.634
PI 36:4	22.206			level2	Alyssin	8.102		9.116	level2	5-Hydroxymethyl-6-methyluracil	7.385			level2			PC O-42:4	24.0163	20.85
PE 40:6|PE 18:0_22:6	22.14			level2	Lys-Val	8.374		9.137	level2	7-Aminoheptanoic acid	4.414			level2			PC O-44:7	22.134	20.485
NAE 22:5	19.957			level2	Thr-Gln	8.119		9.141	level2	3-(6-Oxopyrazolo[1,5-a]pyrido[3,4-e]pyrimidin-7(6H)-yl)propanoic acid	3.72			level2			PC O-44:6	22.785	20.731
3-(2-Chlorophenyl)-1H-pyrazole-5-carboxylic acid	3.826			level2	Muramic acid	8.28998		9.141	level2	Valerophenone	14.012			level2			PC O-44:5	24.0271	21.327
2,3-Quinolinedicarboxylic acid	4.954			level2	Ser-Gly	8.225		9.142	level2	Chrysanthemic Acid	13.628			level2			PC O-46:8	22.462	20.582
SM 35:1;O2|SM 18:1;O2/17:0	23.098			level2	Gln-Glu	8.291		9.15	level2	2-Methyl-4-nitroaniline	10.395			level2			PC O-46:7	23.787	21.129
PC 35:5|PC 15:1_20:4	23.061			level2	Tyr-Arg	8.351		9.164	level2	2-Thiazolamine, 4-[4-(phenylmethyl)phenyl]-	4.423			level2			PC O-46:6		21.438
.alpha.-Tocopheryl acetate	23.94			level2	S-succinylcysteine	8.252		9.17	level2	6-Azathymine	4.139			level2			FA 14:1;O2			1.302
PC O-37:9|PC O-18:4_19:5	23.368			level2	Propamocarb	8.36		9.171	level2	METFORMIN	4.068			level2			FA 20:3;O3			1.379
5-Butyl-1H-pyrazole-3-carboxylic acid	3.816			level2	Val-Arg	8.353		9.185	level2	menthofuran	12.726			level2			PC O-38:6|PC O-19:2_19:4			1.449
Chenodeoxycholic acid 24-acyl-.beta.-D-glucuronide	4.525			level2	Gly-Asp	8.255		9.19	level2	Lys-Val	8.365			level2			Arg-Gln	12.139
6-[(2,4-Dinitrophenyl)amino]hexanoic acid	8.583			level2	2,3-Diphospho-D-glyceric acid	9.468		9.238	level2	(S)-(+)-4-Amino-3-hydroxybutyric acid	3.707			level2
					Ortophosphate	8.275		9.242	level2	Monobutyl phthalate	13.882			level2
					5-Bromo-2-[(2-fluorobenzoyl)amino]benzoic acid	8.283		9.243	level2	.alpha.-Tocopheryl acetate	23.93			level2
					Thr-Asn	8.381		9.262	level2	Malonyl-L-carnitine	7.789			level2
					3-Deoxy-D-glycero-D-galacto-2-nonulosonic acid	8.296		9.264	level2	Goniothalenol	13.069			level2
					Gln-Gln	8.383		9.267	level2	1-Amino-2-methylanthraquinone	5.172			level2
					Val-Lys	8.416		9.268	level2
					His-Ala	8.388		9.278	level2
					Ser-Asp	8.413		9.317	level2
					L-.gamma.-Glutamyl-L-glutamic acid	8.45		9.328	level2
					Ser-Ser	8.424		9.337	level2
					Gly-Asn	8.476		9.36	level2
					Gln-Asn	8.474		9.362	level2
					His-Thr	8.522		9.395	level2
					.alpha.-Asp-Gly	8.503		9.425	level2
					Arg-Pro	8.54321		9.442	level2
					Glu-Asn	8.48837		9.445	level2
					Lys-Pro	8.54		9.45	level2
					Asn-Asn	8.554		9.459	level2
					gamma-Glutamylglutamine	8.58		9.477	level2
					Glu-Gln	8.583		9.484	level2
					Flavin??adenine??dinucleotide	8.609		9.485	level2
					N-Acetylglucosaminylasparagine	8.587		9.495	level2
					Asp-Asp	8.588		9.512	level2
					Maltotriose	8.547		9.519	level2
					Asp-Ser	8.633		9.551	level2
					2,5-Dichlorolichexanthone	8.66517		9.561	level2
					Arg-Ala	8.752		9.583	level2
					Prolinamide	8.75		9.587	level2
					Sedoheptulose 7-phosphate; LC-tDDA; CE10	8.634		9.595	level2
					Phosphocreatine	8.66		9.597	level2
					1-Amino-2-anthraquinonesulfonic acid	8.916		9.673	level2
					D-Fructose 6-phosphate	8.62		9.693	level2
					Glu-His	8.787		9.698	level2
					Gly-Arg	8.811		9.698	level2
					Glu-Arg			9.698	level2
					.gamma.-Glu-.epsilon.-Lys	8.801		9.702	level2
					4-(Trifluoromethyl)quinoline-2,7-diol	8.776		9.702	level2
					Glu-Lys	8.801		9.709	level2
					Lys-Glu	8.843		9.709	level2
					Adenosine 5'-diphosphoribose	8.804		9.714	level2
					Lys-Gln	8.82		9.739	level2
					Asp-Arg	8.83		9.753	level2
					Lys-Asp	8.833		9.765	level2
					Asp-Lys	8.833		9.765	level2
					Uridine-5'-diphosphate sodium salt	8.976		9.77	level2
					Uridine-5'-diphospho-glucose disodium salt	8.947		9.929	level2
					myo-Inositol-1-phosphate	8.672		9.929	level2
					D-Glucosamine-6-phosphate sodium salt	8.996		9.933	level2
					Guanosine-5'-diphospho-beta-L-fucose	9.002		9.965	level2
					.beta.-Nicotinamide adenine dinucleotide phosphate	9.065		10.05	level2
					Guanosine 5'-diphosphoglucose	9.092		10.088	level2
					Methylenediphosphonic acid	8.569		10.116	level2
					SM 38:1;O2|SM 18:1;O2/20:0	20.108			level2
					Acetylimbricatolic acid	19.76			level2
					3-ALPHA,11-BETA,17-ALPHA,21-TETRAHYDROXY- 5-ALPHA-PREGNAN-20-ONE	20.071			level2
					Tris(1,3-dichlorisopropyl)phosphate (TDCPP)	16.301			level2
					SM 42:3;O2|SM 20:0;O2/22:3	3.758			level2
					DG 34:3|DG 16:1_18:2	23.381			level2
					PEtOH 32:2|PEtOH 16:1_16:1	23.359			level2
					N-Acetylsphingosine	17.974			level2
					2-Pyridylacetic acid	6.016			level2
					PC 30:2	21.918			level2
					Cer 28:0;O3|Cer 14:0;O2/14:0(3OH)	22.5			level2
					1-(4-Chlorobenzyl)-3-methyl-1H-thieno[2,3-c]pyrazole-5-carboxylic acid	6.062			level2
					proline_betaine	4.877			level2
					CAR 16:2	17.628			level2
					Triethylene glycol monobutyl ether	12.936			level2
					LPG O-17:1	18.675			level2
					1-Arachidonoylglycerol	19.472			level2
					1H-Indole-3-carboxamide, 1-(5-fluoropentyl)-N-1-naphthalenyl-	7.71			level2
					LPG 20:3	19.228			level2
					PC O-40:8	23.509			level2
					UDP-xylose	8.924			level2
					FA 18:3	18.518			level2
					4-Bromo-3-(4-chlorophenyl)-1H-pyrazole	5.037			level2
					LPA 18:3	20.509			level2
					5-Methyluridine	6.7			level2
					Thiazolidine-4-carboxylic acid	4.711			level2
					Arachidonoyl-N,N-dimethylamide	20.588			level2
					Thr-Glu-Arg	7.868			level2
					5-Fluorouridine	4.523			level2
					PE O-37:3	23.39			level2
					2-Aminoisobutyric acid	6.434			level2
					PG 40:8|PG 18:2_22:6	22.853			level2
					3-Methylbenzoic acid	11.781			level2
					2,2',2''-Nitrilotriethanol	4.778			level2
					Asp-Gln	8.554			level2
					2-Amino-2-methylpentanoic acid	5.109			level2
					DG 36:3|DG 16:0_20:3	21.023			level2
					PA 34:2|PA 16:1_18:1	23.903			level2
					Octamethylcyclotetrasiloxane	3.478			level2
					(S)-3,5-Dihydroxyphenylglycine	5.385			level2
					D-SEDOHEPTULOSE	5.154			level2
					ST 27:1;O	21.026			level2
					5-Methylpyridine-2-carboxylic acid	5.151			level2
					2-{2-[2-(Methacryloyloxy)ethoxy]ethoxy}ethyl 2-methylacrylate	4.621			level2
					FA 22:4	19.886			level2
					Asn-Glu	8.342			level2
					3-Bromo-5-chloropyridin-2-ol	3.812			level2
					3-Hydroxyacetaminophen	5.337			level2
					Ala-Ser	7.935			level2
					PE 40:6	23.591			level2
					2-Hydroxy-5-bromobenzophenone	9.163			level2
					(3Z,5E)-4-hydroxy-6-(4-hydroxyphenyl)hexa-3,5-dien-2-one	17.698			level2
					PC O-38:7|PC O-18:4_20:3	23.123			level2
					2,3',4,5'-Tetramethoxystilbene	17.701			level2
					(12Z)-9,10,11-Trihydroxyoctadec-12-enoic acid	13.981			level2
					5-AMINOPENTANOIC ACID	5.991			level2
					2'-Deoxyuridine 5'-monophosphate	3.665			level2
					PG 34:0|PG 16:0_18:0	22.699			level2
					NAGly 24:3;O	16.88			level2
					PE 34:0;O3|PE 18:0_16:0;O3	22.655			level2
					Argininosuccinic acid	8.844			level2
					(12Z,15Z)-9,10,11-Trihydroxyoctadeca-12,15-dienoic acid	13.408			level2
					Ethyl sulfate	4.523			level2
					2,4-Dimethyl-6-nitrophenol	12.453			level2
					1-[(4-Fluorophenyl)sulfonyl]piperazine	3.856			level2
					Palmitoyleicosapentaenoyl phosphatidylcholine	22.553			level2
					SM 40:4;O2|SM 23:0;O2/17:4	20.111			level2
					9Z,11E,13E-Octadecatrienoic acid methyl ester	18.783			level2
					BETAINE	4.881			level2
					L-Valine	5.974			level2
					7.alpha.,24(S)-Dihydroxy-4-cholesten-3-one	18.386			level2
					PE P-34:2|PE P-16:0_18:2	23.421			level2
					4,4'-(Propane-2,2-diyl)bis(2,6-bis((dimethylamino)methyl)phenol)	17.983			level2
					Ser-Asn	8.519			level2
					N-Methyl-D-glucamine	7.589			level2
					N-Cyclohexanecarbonyltetradecylamine	20.895			level2
					O-t-Butyl-L-serine, methyl ester	6.833			level2
					DG 36:4|DG 18:2_18:2	23.591			level2
					Pro-Leu-Lys	8.299			level2
					NAE 20:2	19.239			level2
					Leu-Asp-Lys	8.565			level2
					5Z,8Z,14Z-Eicosatrienoic acid	20.381			level2
					[6]-Gingerol	15.312			level2
					Chlorbromuron	3.797			level2
					20-Hydroxyarachidonic acid	18.353			level2
					PI 38:3	23.186			level2
					DG 30:0|DG 14:0_16:0	23.764			level2
					SM 42:5;O2	20.818			level2
					NAE 20:5	19.96			level2
					2-Hydroxycinnamic acid, predominantly trans	6.294			level2
					N.epsilon.-Methyl-L-lysine	8.409			level2
					5-(2-Furyl)-4H-1,2,4-triazol-3-amine	4.516			level2
					5-[2-(4-Chlorophenyl)hydrazin-1-ylidene]-2,2-dimethyl-1,3-dioxane-4,6-dione	3.94			level2
					PC 31:1	22.553			level2
					Guanosine 5_-diphosphate	9.046			level2
					Stearic acid	23.903			level2
					PC O-41:10	20.785			level2
					5-Chloro-3-nitro-2-pyridinol	3.633			level2
					FA 24:0	22.893			level2
					Pyridoxal hydrochrolide	15.515			level2
					LNnT	8.835			level2
					SM 33:1;O2	22.434			level2
					SM 36:0;O2	22.336			level2
					N-Acetyl-D-galactosamine 4-sulfate	4.547			level2
					PE P-36:5|PE P-16:0_20:5	22.842			level2
					Buprenorphine	3.755			level2
					3,5-Di-tert-butyl-2-hydroxybenzaldehyde	16.5			level2
					1-Oleoyl-2-palmitoyl-sn-glycero-3-phosphocholine	5.479			level2
					FA 16:2	18.002			level2
					PE 38:5	23.077			level2
					2-[(1-Methyl-1H-pyrazolo[3,4-d]pyrimidin-4-yl)amino]ethanol	6.538			level2
					Axistatin1/2	17.896			level2
					(4-Oxo-1,2,3-benzotriazin-3(4H)-yl)acetic acid	8.451			level2
					PE 37:4	23.331			level2
					NAGlySer 28:3;O	21.475			level2
					Hexaconazole	6.782			level2
					etheno-dG	7.493			level2
					SM 41:1;O2|SM 18:1;O2/23:0	23.364			level2
					Fludrocortisone	3.808			level2
					FA 22:0	22.005			level2
					PE P-40:7|PE P-18:1_22:6	23.239			level2
					SM 42:4;O2|SM 25:0;O2/17:4	22.52			level2
					.beta.-Hydroxyphenylalanine	4.523			level2
					1-Acetylimidazole	8.388			level2
					PC 37:3	23.699			level2
					Skimmin	8.261			level2
					Glu-Leu-Arg	6.746			level2
					PG 36:5|PG 18:2_18:3	22.522			level2
					ADENOSINE 3',5'-DIPHOSPHATE	9.474			level2
					1,2-Dimyristoyl-sn-glycero-3-phospho-L-serine	20.397			level2
					LPC 18:3	18.374			level2
					Octanoate	4.023			level2
					Aztreonam	4.451			level2
					PC O-34:0|PC O-10:0_24:0	21.907			level2
					FA 24:1;O	21.603			level2
					FA 23:0	22.408			level2
					9S,11R,15S-Trihydroxy-20a,20b-dihomo-5Z,13E-prostadienoic acid	20.362			level2
					3-(2-Chlorophenyl)-1H-pyrazole-5-carboxylic acid	3.796			level2
					15-Ketoprostaglandin A1	16.85			level2
					Dimethenamide ESA	5.066			level2
					PE 40:7	22.932			level2
					Piliformic-acid	13.016			level2
					Malonyl-L-carnitine	7.813			level2
					ADENOSINE TRIPHOSPHATE	9.47			level2
					Daidzein	8.404			level2

## Sheet: Fig.5
Figure 5a				Figure 5b						Figure 5c					Figure 5d					Figure 5e							Figure 5f								Figure 5g
Name	Metabolites classes			Name	Chemical classes	Detection frequency (%)	Quantitative frequency (%)			Name	Chemical classes	Quantitative frequency (%)			Name	Chemical classes	Quantitative frequency (%)	Mean (ng/mL)		Name	Detected on TQMS	Not detected on HRMS	Low response on HRMS	High response on HRMS			Name	Qualitafied on TQMS	Not detected on HRMS	Low response on HRMS	High response on HRMS				9Cl- PF3ONS (log 10 concentration)		Cyclamic acid (log 10 concentration)		Nicotine (log 10 concentration)		PFDA (log 10 concentration)		PFHps (log 10 concentration)		PFNA (log 10 concentration)		PFUdA (log 10 concentration)
1-Palmitoyl-2-azelaoylphosphatidylcholine	Amine			BHT alcohol	Pollutants-UV Absorbers	100	97.4684			Dinoseb	Pollutants-Phenols	1.26582			Avobenzone	Pollutants-UV Absorbers	31.6456	0.639368		2,4,5-Trichlorophenoxyacetic acid	2	2	0	0			2,4,5-Trichlorophenoxyacetic acid	2	2	0	0				Detected on TQMS	Detected on HRMS	Detected on TQMS	Detected on HRMS	Detected on TQMS	Detected on HRMS	Detected on TQMS	Detected on HRMS	Detected on TQMS	Detected on HRMS	Detected on TQMS	Detected on HRMS	Detected on TQMS	Detected on HRMS
3-Aminopiperidin-2-one	Amine			Chlorferone	Pesticides-Insecticides	100	88.6076			Salmeterol	Drugs-Adrenal receptor drugs	1.26582			DETX	Pollutants-Others	35.443	0.0396522		2,4-Diethyl-9H-thioxanthen-9-one	44	44	0	0			2,4-Diethyl-9H-thioxanthen-9-one	28	28	0	0				-0.16615	0.52059	-0.82248	1.52672	0.02968	0.88368	-0.5949	0.29749	-1.16889	-0.24629	-1.36785	-0.1162	-1.70396	0.3877
Allantoin	Amine			4-Nitro-3-cresol	Pesticides-Insecticides	100	100			Siduron	Pesticides-Herbicides	1.26582			Fipronil Desulfinyl	Pesticides-Insecticides	40.5063	0.0186177		2-Ethylhexyl 4-(dimethylamino)benzoate	1	1	0	0			2-Ethylhexyl 4-(dimethylamino)benzoate	0	0	0	0				-0.39484	0.72592	0.74049	2.0033	0.05096	0.93274	-0.56468	0.31532	-1.13852	-0.19555	-0.95446	-0.1032	-1.42029	0.40011
Cyclohexylamine	Amine			DNOC	Pollutants-Phenols	100	98.7342			Acetamiprid	Pesticides-Insecticides	1.26582			Butylparaben	Drugs-Additives	40.5063	0.143834		2-Hydroxy-4-methoxybenzophenone-5-sulfonic acid	2	2	0	0			2-Hydroxy-4-methoxybenzophenone-5-sulfonic acid	2	2	0	0				-0.4282	0.16574	0.44553	1.74286	-0.23065	0.56462	-0.50152	0.35402	-1.13675	-0.0881	-0.94407	-0.09207	-0.94793	0.43037
N-Acetyl-D-mannosamine hydrate	Amine			Androstenedione	Drugs-Hormones	100	100			Desloratadine	Drugs-Antihistamines	1.26582			Mesulfenfos	Pesticides-Insecticides	45.5696	0.00511833		3,5-Di-tert-butyl-4-hydroxybenzyl alcohol	79	79	0	0			3,5-Di-tert-butyl-4-hydroxybenzyl alcohol	77	77	0	0				0.52059	0.16225	-0.2069	1.84154	0.01181	0.90355	-0.49687	0.3665	-1.11682	-0.000864187	-0.89611	-0.01708	-0.89565	0.46264
Phosphocholine	Amine			BADP	Pollutants-Organic Flame Retardants	100	5.06329			Boscalid	Pesticides-Fungicides	1.26582			Rabenzazole	Pesticides-Fungicides	48.1013	0.0779912		3-Chloro-7-hydroxy-4-methylcoumarin	79	79	0	0			3-Chloro-7-hydroxy-4-methylcoumarin	70	70	0	0				0.72592	0.14266	-0.69775	1.90418	-0.10068	0.75016	-0.46644	0.37967	-1.07866	0.00293	-0.71718	0.00468	-0.84835	0.50678
Serotonin	Amine			Bisphenol AF	Pollutants-Phenols	100	-			Spirotetramat-enol	Pesticides-Insecticides	1.26582			Terbucarb	Pesticides-Herbicides	50.6329	0.341651		3-Methyl-4-nitrophenol	79	79	0	0			3-Methyl-4-nitrophenol	79	79	0	0				0.16574	0.37123	-0.89603	2.11479	0.28743	0.83829	-0.43745	0.38074	-1.07496		-0.71059	0.10115	-0.82279	0.51199
1-Methyl-L-histidine	Amino Acid			9Cl-PF3ONS	Pollutants-PFASs	100	100			CCIM	Pesticides-Fungicides	1.26582			PFOS	Pollutants-PFASs	54.4304	16.304		4,4'-Bis(diethylamino)benzophenone	9	9	0	0			4,4'-Bis(diethylamino)benzophenone	3	3	0	0				0.16225	1.00256	1.52672	1.40894	0.01117	1.03241	-0.40095	0.38208	-0.98721		-0.68975	0.10278	-0.72594	0.53939
2-Acetamidooctanoic acid	Amino Acid			Cortisol	Drugs-Hormones	100	-			Amlodipine besylate	Drugs-Others	1.26582			Diethyltoluamide	Pollutants-Others	55.6962	0.12241		4,6-Dinitro-O-cresol	79	68	11	0			4,6-Dinitro-O-cresol	78	67	11	0				-0.92517	0.24485	-0.78	2.30123	-0.07167	0.3974	-0.38697	0.39686	-0.93495		-0.6596	0.11745	-0.7191	0.54275
2-Amino-6-phosphonohexanoic acid	Amino Acid			Cyclamic acid	Drugs-Additives	100	100			Brombuterol	Drugs-Adrenal receptor drugs	1.26582			5-Oxo-MEHP	Pollutants-Others	55.6962	1.01417		4-Chloro-5-(p-tolyl)-1H-imidazole-2-carbonitrile	1	1	0	0			4-Chloro-5-(p-tolyl)-1H-imidazole-2-carbonitrile	1	1	0	0				-0.3548	0.13652	-0.63314		-0.11415	0.81943	-0.35306	0.40677	-0.92678		-0.64605	0.20051	-0.7015	0.56168
3-Aminoglutarimide	Amino Acid			Dazomet	Pesticides-Fungicides	100	100			Carbamazepine	Drugs-Others	1.26582			Quinoxyfen	Pesticides-Fungicides	55.6962	0.0148579		Acetamiprid	4	4	0	0			Acetamiprid	1	1	0	0				0.21763	0.04493	1.22032		-0.04768		-0.29884	0.41816	-0.91313		-0.57435	0.21672	-0.69882	0.56595
3-Methylhistidine	Amino Acid			Fipronil	Pesticides-Insecticides	100	100			Cycluron	Pesticides-Herbicides	1.26582			RhodamineB	Pollutants-Dyes	58.2278	0.210963		Amlodipine besylate	1	0	1	0			Amlodipine besylate	1	0	1	0				0.04303	0.4968	0.2565		-0.02854		-0.28913	0.45488	-0.82338		-0.56256	0.22421	-0.57798	0.57412
4-Hydroxy-L-isoleucine	Amino Acid			Isopyrazam	Pesticides-Fungicides	100	100			Estrone	Drugs-Hormones	1.26582			Fipronil-sulfide	Pesticides-Insecticides	59.4937	0.00427602		Androstenedione	79	6	73	0			Androstenedione	79	6	73	0				-0.02639	0.17193	1.2175		-0.19142		-0.26356	0.45637	-0.78368		-0.43318	0.23302	-0.47071	0.6029
5-Hydroxy-DL-lysine	Amino Acid			Nicotine	Drugs-Others	100	100			Flufenoxuron	Pesticides-Insecticides	1.26582			PFHps	Pollutants-PFASs	62.0253	0.308045		Azithromycin	4	4	0	0			Azithromycin	4	4	0	0				-0.09619	0.30333	-0.40375		-0.04069		-0.26049	0.48803	-0.75746		-0.41718	0.25228	-0.46351	0.62475
Acetyl-L-threonine	Amino Acid			PFDoA	Pollutants-PFASs	100	82.2785			Fluopyram	Pesticides-Fungicides	1.26582			Tebufenozide	Pesticides-Insecticides	65.8228	0.567712		Betaxolol	8	8	0	0			Betaxolol	3	3	0	0				0.14266	0.12456	-0.20302		-0.20492		-0.21763	0.4996	-0.751		-0.35022	0.26218	-0.43361	0.63433
Alanine	Amino Acid			PFHpA	Pollutants-PFASs	100	100			Fluxapyroxad	Pesticides-Fungicides	1.26582			tBPDP	Pollutants-Organic Flame Retardants	68.3544	0.0542114		Bis(2-butoxyethyl) phthalate	9	6	3	0			Bis(2-butoxyethyl) phthalate	3	3	0	0				0.37123	0.1455	-0.76067		0.88368		-0.2138	0.53581	-0.72383		-0.34113	0.26591	-0.43103	0.65634
Allothreonine	Amino Acid			PFHxS	Pollutants-PFASs	100	100			Glyburide	Drugs-Others	1.26582			Ketorolac	Drugs-Anti-inflammatory drugs	70.8861	1.41754		Bis[2-(perfluorohexyl)ethyl] phosphate	78	78	0	0			Bis[2-(perfluorohexyl)ethyl] phosphate	78	78	0	0				1.00256	0.08976	0.97715		0.1749		-0.21282	0.5367	-0.71344		-0.26694	0.3225	-0.39957	0.67292
Asparagine	Amino Acid			PFNA	Pollutants-PFASs	100	98.7342			Hexestrol	Drugs-Hormones	1.26582			17-OHPC	Drugs-Hormones	77.2152	0.681855		Bisphenol A bis(diphenyl phosphate)	79	79	0	0			Bisphenol A bis(diphenyl phosphate)	4	4	0	0				0.24485	0.9026	-0.66425		-0.06078		-0.19845	0.53691	-0.69453		-0.24523	0.32606	-0.38576	0.67357
Aspartic acid	Amino Acid			PFOA	Pollutants-PFASs	100	100			Isocarbophos	Pesticides-Insecticides	1.26582			PFDoA	Pollutants-PFASs	82.2785	0.102403		Bisphenol AF	79	79	0	0			Bisphenol AF	0	0	0	0				0.13652	0.35115	-0.84556		0.25883		-0.1918	0.55778	-0.68013		-0.24195	0.35137	-0.36691	0.68905
beta-Hydroxyleucine	Amino Acid			PFUdA	Pollutants-PFASs	100	100			Isoxaflutole	Pesticides-Herbicides	1.26582			Testosterone	Drugs-Hormones	82.2785	4.1436		Bisphenol S	60	60	0	0			Bisphenol S	0	0	0	0				0.04493	0.3092	0.55139		0.06202		-0.19078	0.57271	-0.66311		-0.18866	0.38192	-0.36191	0.71373
Carnosine	Amino Acid			RhodamineB	Pollutants-Dyes	100	58.2278			Mebendazole-amine	Drugs-Antimicrobial Agents	1.26582			Chlorferone	Pesticides-Insecticides	88.6076	0.61479		Boscalid	2	2	0	0			Boscalid	1	1	0	0				0.4968	0.18196	-0.88077		0.0614		-0.18666	0.60555	-0.66177		-0.186	0.38855	-0.357	0.77197
Cinnamoylglycine	Amino Acid			Terbucarb	Pesticides-Herbicides	100	50.6329			Mecoprop	Pesticides-Fungicides	1.26582			PFDA	Pollutants-PFASs	91.1392	1.76559		Bromacil	4	4	0	0			Bromacil	4	4	0	0				-0.90954	0.29717	2.0033		-0.18099		-0.18604	0.69142	-0.66022		-0.17057	0.41735	-0.31786	0.78287
Citrulline	Amino Acid			tBPDP	Pollutants-Organic Flame Retardants	100	68.3544			Moxifloxacin	Drugs-Antimicrobial Agents	1.26582			PFTrDA	Pollutants-PFASs	92.4051	0.244323		Brombuterol	1	1	0	0			Brombuterol	1	1	0	0				-1.69483	0.32912	0.75865		0.93274		-0.17544	0.69844	-0.65439		-0.16143	0.42231	-0.31363	0.80901
Creatine	Amino Acid			6:2 diPAP	Pollutants-PFASs	98.7342	98.7342			Nitrendipine	Drugs-Others	1.26582			17-OHP	Drugs-Hormones	93.6709	0.33077		Butyl methoxydibenzoylmethane	76	3	72	1			Butyl methoxydibenzoylmethane	25	2	22	1				-0.19587	0.18952	-0.59227		0.06961		-0.15851	0.742	-0.63934		-0.1162	0.43095	-0.31244
Cycloleucine	Amino Acid			Fipronil sulfone	Pesticides-Insecticides	98.7342	98.7342			Paclobutrazol	Pesticides-Others	1.26582			Lufenuron	Pesticides-Insecticides	93.6709	0.0555482		Butylparaben	33	33	0	0			Butylparaben	32	32	0	0				-0.18713	0.39216	-0.21601		-0.06784		-0.06	0.7434	-0.62364		-0.11102	0.45544	-0.29988
Cysteine	Amino Acid			Isonoruron	Pesticides-Herbicides	98.7342	98.7342			Prednisolone	Drugs-Hormones	1.26582			BHT alcohol	Pollutants-UV Absorbers	97.4684	1.54345		Cadusafos	11	11	0	0			Cadusafos	0	0	0	0				-0.24522	0.6066	-0.93943		0.16198		-0.05154		-0.61744		-0.1032	0.46937	-0.27924
Cystine	Amino Acid			Thiacloprid	Pesticides-Insecticides	98.7342	98.7342			Promethazine	Drugs-Antihistamines	1.26582			DNOC	Pollutants-Phenols	98.7342	0.954527		Carbamazepine	1	1	0	0			Carbamazepine	1	1	0	0				0.02546		-0.87393		0.14054		0.000170554		-0.55586		-0.10078	0.49622	-0.25662
E-N-Deoxyfructosyllysine	Amino Acid			PFDA	Pollutants-PFASs	97.4684	91.1392			Resmethrin	Pesticides-Insecticides	1.26582			PFNA	Pollutants-PFASs	98.7342	2.34461		Cetirizine hydrochloride	2	1	0	1			Cetirizine hydrochloride	2	1	0	1				-0.04276		-0.51287		-0.05238		0.0274		-0.52798		-0.09561	0.50438	-0.2288
Ergothioneine	Amino Acid			Avobenzone	Pollutants-UV Absorbers	96.2025	31.6456			Sethoxydim	Pesticides-Herbicides	1.26582			6:2 diPAP	Pollutants-PFASs	98.7342	0.0316388		Chlorantraniliprole	2	2	0	0			Chlorantraniliprole	0	0	0	0				-0.3764		-0.04647		-0.02504		0.03726		-0.51977		-0.0928	0.51623	-0.21608
Ethionine	Amino Acid			PFTrDA	Pollutants-PFASs	96.2025	92.4051			Simeconazole	Pesticides-Fungicides	1.26582			Fipronil sulfone	Pesticides-Insecticides	98.7342	0.105777		Chlorbenzuron	72	72	0	0			Chlorbenzuron	7	7	0	0				-0.01262		0.15064		0.13752		0.06005		-0.51359		-0.09207	0.52365	-0.20746
Glu-ol	Amino Acid			17-OHP	Drugs-Hormones	93.6709	93.6709			Sulfanitran	Drugs-Antimicrobial Agents	1.26582			Isonoruron	Pesticides-Herbicides	98.7342	44.5063		Chloro-3-oxa-perfluorononanesulfonic acid	79	17	37	25			Chloro-3-oxa-perfluorononanesulfonic acid	79	17	37	25				0.07873		1.74286		-0.0921		0.12192		-0.49049		-0.07653	0.57101	-0.1713
Glutamic acid	Amino Acid			Lufenuron	Pesticides-Insecticides	93.6709	93.6709			Sulfoaildenafil	Drugs-Others	1.26582			Thiacloprid	Pesticides-Insecticides	98.7342	0.00238039		Chlorothalonil	17	17	0	0			Chlorothalonil	17	17	0	0				0.12786		-0.7252		-0.01237		0.14686		-0.47706		-0.02906	0.57731	-0.16363
Glutamine	Amino Acid			Chlorbenzuron	Pesticides-Herbicides	91.1392	8.86076			Tadalafil	Drugs-Hormones	1.26582			4-Nitro-3-cresol	Pesticides-Insecticides	100	1.80435		Chlorpheniramine maleate	13	9	1	3			Chlorpheniramine maleate	10	6	1	3				0.15586		1.10594		0.56462		0.15568		-0.46696		-0.01708	0.58008	-0.1094
Glutamylalanine	Amino Acid			Testosterone	Drugs-Hormones	88.6076	82.2785			Thiobencarb	Pesticides-Insecticides	1.26582			Androstenedione	Drugs-Hormones	100	0.926209		Cortisol	79	0	0	79			Cortisol	0	0	0	0				0.01197		-0.74508		-0.14617		0.16023		-0.44446		0.00468	0.58603	-0.09262
Guanidineacetic acid	Amino Acid			Rabenzazole	Pesticides-Fungicides	84.8101	48.1013			Tolbutamide	Drugs-Others	1.26582			9Cl-PF3ONS	Pollutants-PFASs	100	1.2239		Crufomate	7	7	0	0			Crufomate	4	4	0	0				-0.04502		0.18602		-0.17598		0.16808		-0.44203		0.10115	0.5902	-0.037
Histidine	Amino Acid			Ketorolac	Drugs-Anti-inflammatory drugs	83.5443	70.8861			Trimethoprim	Drugs-Antimicrobial Agents	1.26582			Cyclamic acid	Drugs-Additives	100	11.5967		Cyclamic acid	79	57	14	8			Cyclamic acid	79	57	14	8				-0.08042		-0.78427		-0.02504		0.17775		-0.44181		0.10278	0.60681	-0.000943064
Homoarginine	Amino Acid			17-OHPC	Drugs-Hormones	79.7468	77.2152			Tebuconazole	Pesticides-Fungicides	2.53165			Dazomet	Pesticides-Fungicides	100	1.73801		Cycluron	1	1	0	0			Cycluron	1	1	0	0				-0.32627		-0.57632		0.90355		0.18108		-0.41051		0.11745	0.65054	0.0136
Homocitrulline	Amino Acid			Bisphenol S	Pollutants-Phenols	75.9494	-			Prochloraz-desimidazole-amino	Pesticides-Fungicides	2.53165			Fipronil	Pesticides-Insecticides	100	0.0113939		Cyromazine	5	2	3	0			Cyromazine	0	0	0	0				-0.51111		-0.40306		-0.11049		0.18709		-0.40185		0.20051	0.65682	0.02735
Leucine	Amino Acid			Fipronil-sulfide	Pesticides-Insecticides	75.9494	59.4937			Methicillin	Drugs-Antimicrobial Agents	2.53165			Isopyrazam	Pesticides-Fungicides	100	0.631985		Dazomet	79	79	0	0			Dazomet	79	79	0	0				-0.1585		-0.90686		0.75016		0.20302		-0.40167		0.21672	0.66438	0.08966
Linoleoylglycine	Amino Acid			Mevinphos	Pesticides-Insecticides	74.6835	24.0506			Prochloraz desimidazole-formylamino	Pesticides-Fungicides	2.53165			Nicotine	Drugs-Others	100	1.61988		Desloratadine	3	3	0	0			Desloratadine	1	1	0	0				-0.07277		-0.87225		0.14199		0.21208		-0.39533		0.22421	0.69694	0.12353
Lysine	Amino Acid			Mesulfenfos	Pesticides-Insecticides	69.6203	45.5696			Trioxone	Pesticides-Fungicides	2.53165			PFHpA	Pollutants-PFASs	100	0.131713		Diclofenac Acid	14	12	1	1			Diclofenac Acid	12	10	1	1				0.02179		1.84154		0.12375		0.21452		-0.39174		0.23302	0.69825	0.12488
Methionine sulfoxide	Amino Acid			Tebufenozide	Pesticides-Insecticides	65.8228	65.8228			Sulisobenzone	Pollutants-UV Absorbers	2.53165			PFHxS	Pollutants-PFASs	100	4.88966		Diethyltoluamide	48	0	48	0			Diethyltoluamide	44	0	44	0				-0.10822		1.22563		0.83829		0.22667		-0.38704		0.25228	0.70777	0.13147
Methyl O-(tert-butyl)-L-serinate	Amino Acid			PFHps	Pollutants-PFASs	64.557	62.0253			Cetirizine	Drugs-Antihistamines	2.53165			PFOA	Pollutants-PFASs	100	15.3156		Difenoconazole	15	15	0	0			Difenoconazole	15	15	0	0				-0.18806		0.1976		0.1164		0.23275		-0.33328		0.26218	0.71798	0.15259
N(6)-acetimidoyl-L-lysine	Amino Acid			PFOS	Pollutants-PFASs	64.557	54.4304			Dimefuron	Pesticides-Herbicides	2.53165			PFUdA	Pollutants-PFASs	100	1.81597		Dimefuron	2	2	0	0			Dimefuron	2	2	0	0				-0.55641		-0.78722		0.21297		0.25121		-0.32887		0.26591	0.72836	0.17229
N,N,N-trimethyllysine	Amino Acid			Diethyltoluamide	Pollutants-Others	60.7595	55.6962			Erythromycin	Drugs-Antimicrobial Agents	2.53165								Dinoseb	34	0	34	0			Dinoseb	1	0	1	0				-0.0041		-0.56201		0.02343		0.25317		-0.29188		0.3225	0.74133	0.1943
N,N-Dimethyl-arginine	Amino Acid			DETX	Pollutants-Others	55.6962	35.443			Fensulfothion-Sulfone	Pesticides-Insecticides	2.53165								Dinoterb	22	0	22	0			Dinoterb	0	0	0	0				-0.01911		1.90418		-0.13557		0.27175		-0.24629		0.32606	0.74276	0.24098
N,N-Dimethyl-lysine	Amino Acid			5-Oxo-MEHP	Pollutants-Others	55.6962	55.6962			Irbesartan	Drugs-Others	2.53165								Diphenamid	12	12	0	0			Diphenamid	12	12	0	0				0.05074		0.82282		-0.09824		0.28416		-0.19555		0.35137	0.84182	0.24468
N.alpha.-Acetyl-L-lysine	Amino Acid			Quinoxyfen	Pesticides-Fungicides	55.6962	55.6962			Metformin	Drugs-Others	2.53165								Diphenhydramine hydrochloride	3	3	0	0			Diphenhydramine hydrochloride	3	3	0	0				-0.17286		-0.56458		-0.14032		0.29749		-0.0881		0.38192	0.84527	0.25071
N-3-Oxohexadec-11Z-enoyl-L-homoserine lactone	Amino Acid			Fipronil Desulfinyl	Pesticides-Insecticides	44.3038	40.5063			Myclobutanil	Pesticides-Fungicides	2.53165								Erythromycin	2	2	0	0			Erythromycin	2	2	0	0				-0.28513		-0.3431		-0.00308		0.30391		-0.000864187		0.38855	0.89945	0.25563
N-Acetyl-arginine	Amino Acid			Dinoseb	Pollutants-Phenols	43.038	1.26582			Nifedipine	Drugs-Others	2.53165								Estrone	1	1	0	0			Estrone	1	1	0	0				-0.52231		1.1081		-0.05609		0.30434		0.00293		0.41735	0.91055	0.25918
N-Acetyl-aspartic acid	Amino Acid			Butylparaben	Drugs-Additives	41.7722	40.5063			Noscapine	Drugs-Others	2.53165								Ethylparaben	2	2	0	0			Ethylparaben	0	0	0	0				-0.6749		-0.41339		-0.08302		0.31532				0.42231	0.91593	0.26542
N-Acetylglycine	Amino Acid			Fluacrypyrim	Pesticides-Insecticides	31.6456	-			Phenylbutazone	Drugs-Anti-inflammatory drugs	2.53165								Fensulfothion-Sulfone	2	2	0	0			Fensulfothion-Sulfone	2	2	0	0				-0.11431		-0.63101		-0.01979		0.35402				0.43095		0.30341
N-Acetyl-L-carnosine	Amino Acid			Progesterone	Drugs-Hormones	31.6456	13.9241			Quinocetone	Drugs-Antimicrobial Agents	3.79747								Fipronil	79	79	0	0			Fipronil	79	79	0	0				0.17193		-0.06547		-0.10392		0.3665				0.45544		0.32808
N-Acetyl-leucine	Amino Acid			Isobutylparaben	Drugs-Additives	29.1139	16.4557			Michler's ethyl ketone	Pollutants-Others	3.79747								Fipronil Desulfinyl	35	35	0	0			Fipronil Desulfinyl	32	32	0	0				0.30333		1.39846		-0.09421		0.37967				0.46937		0.34207
N-Acetyl-L-glutamic acid	Amino Acid			Dinoterb	Pesticides-Herbicides	27.8481	-			Bis(2-butoxyethyl) phthalate	Pollutants-Others	3.79747								Fipronil sulfone	78	73	5	0			Fipronil sulfone	78	73	5	0				0.12456		-0.44886		1.03241		0.38074				0.49622		0.35772
N-Acetyl-L-glutamine	Amino Acid			Halosulfuron-methyl	Pesticides-Herbicides	24.0506	22.7848			Betaxolol	Drugs-Adrenal receptor drugs	3.79747								Fipronil-sulfide	60	60	0	0			Fipronil-sulfide	47	47	0	0				0.1455		-0.31511		-0.1013		0.38208				0.50438		0.37484
N-Acetyl-L-histidine	Amino Acid			Monoethyl phthalate	Pollutants-Others	22.7848	21.519			Pyraclostrobin	Pesticides-Fungicides	3.79747								Fluacrypyrim	25	25	0	0			Fluacrypyrim	0	0	0	0				0.08976		1.12559		0.02111		0.39686				0.51623		0.3877
N-Acetyl-L-methionine	Amino Acid			Chlorothalonil	Pesticides-Fungicides	21.519	21.519			Diphenhydramine	Drugs-Antihistamines	3.79747								Fluazuron	8	8	0	0			Fluazuron	8	8	0	0				0.9026		0.90142		-0.01198		0.40677				0.52365		0.39993
N-Acetyl-L-phenylalanine	Amino Acid			Flunixin	Drugs-Anti-inflammatory drugs	21.519	18.9873			Ganciclovir	Drugs-Others	3.79747								Flufenoxuron	1	1	0	0			Flufenoxuron	1	1	0	0				0.35115		-0.00393		0.3974		0.41816				0.57101		0.40011
N-Acetyl-tryptophan	Amino Acid			Difenoconazole	Pesticides-Fungicides	18.9873	18.9873			Loratadine	Drugs-Antihistamines	3.79747								Flumequine	1	1	0	0			Flumequine	0	0	0	0				0.3092		2.11479		-0.06557		0.45488				0.57731		0.40058
N-Acetyl-valine	Amino Acid			Medroxyprogesterone acetate	Drugs-Hormones	18.9873	-			Matrine	Pesticides-Insecticides	3.79747								Flunixin	17	17	0	0			Flunixin	15	15	0	0				0.18196		1.40894		0.37593		0.45637				0.58008		0.43037
NAGly 14:0	Amino Acid			Diclofenac Acid	Drugs-Anti-inflammatory drugs	17.7215	15.1899			Nicarbazin	Drugs-Antimicrobial Agents	3.79747								Fluopyram	1	1	0	0			Fluopyram	1	1	0	0				0.29717		-0.83147		-0.18443		0.48803				0.58603		0.46264
NAGly 22:2	Amino Acid			Genistein	Drugs-Hormones	17.7215	16.4557			BADP	Pollutants-Organic Flame Retardants	5.06329								Fluxapyroxad	1	1	0	0			Fluxapyroxad	1	1	0	0				0.32912		0.48257		-0.09548		0.4996				0.5902		0.50678
NAGly 24:3;O	Amino Acid			Chlorpheniramine	Drugs-Antihistamines	16.4557	12.6582			Crufomate	Pesticides-Insecticides	5.06329								Ganciclovir	3	2	0	1			Ganciclovir	3	2	0	1				0.18952		-0.274		-0.07826		0.53581				0.60681		0.51199
NAGly 24:5	Amino Acid			Diphenamid	Pesticides-Herbicides	15.1899	15.1899			Azithromycin	Drugs-Antimicrobial Agents	5.06329								Genistein	14	13	1	0			Genistein	13	12	1	0				0.39216		-0.81938		0.01274		0.5367				0.65054		0.53939
N-alpha-Acetyl-L-lysine	Amino Acid			Pioglitazone	Drugs-Others	15.1899	10.1266			Bromacil	Pesticides-Herbicides	5.06329								Glyburide	1	1	0	0			Glyburide	1	1	0	0				0.6066		-0.92782		-0.01604		0.53691				0.65682		0.54275
N-Benzoyl(carboxymethyl)cysteine	Amino Acid			Cadusafos	Pesticides-Insecticides	13.9241	-			Norfloxacin	Drugs-Antimicrobial Agents	5.06329								Halosulfuron-methyl	19	19	0	0			Halosulfuron-methyl	18	18	0	0				-0.97803		-0.66299		-0.12664		0.55778				0.66438		0.56168
N-cis-Octadec-9-enoyl-L-homoserine lactone	Amino Acid			Quinocetone	Drugs-Antimicrobial Agents	13.9241	3.79747			Sulfoxaflor	Pesticides-Insecticides	5.06329								Hexestrol	1	1	0	0			Hexestrol	1	1	0	0				-1.23547		-0.79709		-0.14335		0.57271				0.69694		0.56595
N-cis-Tetradec-9Z-enoyl-L-homoserine lactone	Amino Acid			Salmeterol	Drugs-Adrenal receptor drugs	13.9241	1.26582			Isofenphos oxon	Pesticides-Insecticides	7.59494								Hydroxyprogesterone	63	18	45	0			Hydroxyprogesterone	61	16	45	0				-2.08886		-0.74239		0.000174824		0.60555				0.69825		0.57412
N-epsilon-Acetyllysine	Amino Acid			Michler's ethyl ketone	Pollutants-Others	11.3924	3.79747			Chlorbenzuron	Pesticides-Herbicides	8.86076								Hydroxyprogesterone caproate	74	31	43	0			Hydroxyprogesterone caproate	74	31	43	0				-0.76383		1.16304		-0.15395		0.69142				0.70777		0.6029
N-epsilon-Formyl-L-lysine	Amino Acid			Bis(2-butoxyethyl) phthalate	Pollutants-Others	11.3924	3.79747			Pioglitazone	Drugs-Others	10.1266								Imibenconazole	5	5	0	0			Imibenconazole	0	0	0	0				-0.85771		-0.70681		-0.16654		0.69844				0.71798		0.62475
N-Formyl-L-methionine	Amino Acid			Betaxolol	Drugs-Adrenal receptor drugs	10.1266	3.79747			Fluazuron	Pesticides-Insecticides	10.1266								Irbesartan	2	1	0	1			Irbesartan	2	1	0	1				-1.69494		-0.97422		0.81943		0.742				0.72836		0.63433
N-Fructosyl isoleucine	Amino Acid			Fluazuron	Pesticides-Insecticides	10.1266	10.1266			Roxithromycin	Drugs-Antimicrobial Agents	10.1266								Isobutyl 4-hydroxybenzoate	23	23	0	0			Isobutyl 4-hydroxybenzoate	13	13	0	0				-0.48746		2.30123		-0.06126		0.7434				0.74133		0.65634
N-methyllysine	Amino Acid			Pyraclostrobin	Pesticides-Fungicides	10.1266	3.79747			Chlorpheniramine	Drugs-Antihistamines	12.6582								Isocarbophos	1	1	0	0			Isocarbophos	1	1	0	0				-1.22548		-0.5852		-0.10129						0.74276		0.67292
N-Methylthreonine	Amino Acid			Roxithromycin	Drugs-Antimicrobial Agents	10.1266	10.1266			Progesterone	Drugs-Hormones	13.9241								Isofenphos oxon	6	6	0	0			Isofenphos oxon	6	6	0	0				-1.22828		1.30793		0.03193						0.84182		0.67357
Norvaline	Amino Acid			Crufomate	Pesticides-Insecticides	8.86076	5.06329			Diclofenac Acid	Drugs-Anti-inflammatory drugs	15.1899								Isonoruron	78	78	0	0			Isonoruron	78	78	0	0				-0.85284		-1.00329		-0.26516						0.84527		0.68905
N-succinyl-glycine	Amino Acid			Isofenphos oxon	Pesticides-Insecticides	7.59494	7.59494			Diphenamid	Pesticides-Herbicides	15.1899								Isopyrazam	79	79	0	0			Isopyrazam	79	79	0	0				-1.21096		-0.73489		-0.13204						0.89945		0.71373
Ornithine	Amino Acid			Siduron	Pesticides-Herbicides	7.59494	1.26582			Isobutylparaben	Drugs-Additives	16.4557								Isoxaflutole	1	1	0	0			Isoxaflutole	1	1	0	0				-1.61807		0.74658		-0.22601						0.91055		0.77197
Phenylacetylglutamine	Amino Acid			Cyromazine	Pesticides-Herbicides	6.32911	-			Genistein	Drugs-Hormones	16.4557								Ketorolac	66	66	0	0			Ketorolac	56	56	0	0				-1.09344		-0.92984		-0.16152						0.91593		0.78287
Phenylalanine	Amino Acid			Imibenconazole	Pesticides-Fungicides	6.32911	-			Flunixin	Drugs-Anti-inflammatory drugs	18.9873								Loratadine	3	2	1	0			Loratadine	3	2	1	0				-1.22044		0.1775		-0.1517								0.80901
Proline	Amino Acid			Tebuconazole	Pesticides-Fungicides	6.32911	2.53165			Difenoconazole	Pesticides-Fungicides	18.9873								Lufenuron	74	74	0	0			Lufenuron	74	74	0	0
Putrescine	Amino Acid			Acetamiprid	Pesticides-Insecticides	5.06329	1.26582			Monoethyl phthalate	Pollutants-Others	21.519								Matrine	3	0	1	2			Matrine	3	0	1	2
Pyroglutamic acid	Amino Acid			Azithromycin	Drugs-Antimicrobial Agents	5.06329	5.06329			Chlorothalonil	Pesticides-Fungicides	21.519								Mebendazole-amine	1	1	0	0			Mebendazole-amine	1	1	0	0
Serine	Amino Acid			Bromacil	Pesticides-Herbicides	5.06329	5.06329			Halosulfuron-methyl	Pesticides-Herbicides	22.7848								Mecoprop	1	1	0	0			Mecoprop	1	1	0	0
S-Sulfocysteine	Amino Acid			Norfloxacin	Drugs-Antimicrobial Agents	5.06329	5.06329			Mevinphos	Pesticides-Insecticides	24.0506								Medroxyprogesterone acetate	15	15	0	0			Medroxyprogesterone acetate	0	0	0	0
Symmetric dimethylarginine	Amino Acid			Prochloraz-desimidazole-amino	Pesticides-Fungicides	5.06329	2.53165			Avobenzone	Pollutants-UV Absorbers	31.6456								Mesulfenfos	55	55	0	0			Mesulfenfos	36	36	0	0
trans-4-Hydroxy-L-proline	Amino Acid			Sulfoxaflor	Pesticides-Insecticides	5.06329	5.06329			DETX	Pollutants-Others	35.443								Metformin	2	0	0	2			Metformin	2	2	0	0
Tryptophan	Amino Acid			Desloratadine	Drugs-Antihistamines	3.79747	1.26582			Fipronil Desulfinyl	Pesticides-Insecticides	40.5063								Methicillin	3	3	0	0			Methicillin	2	2	0	0
Tryptophan betaine	Amino Acid			Diphenhydramine	Drugs-Antihistamines	3.79747	3.79747			Butylparaben	Drugs-Additives	40.5063								Mevinphos	59	59	0	0			Mevinphos	19	19	0	0
Tyrosine	Amino Acid			Ganciclovir	Drugs-Others	3.79747	3.79747			Mesulfenfos	Pesticides-Insecticides	45.5696								Minoxidil	1	1	0	0			Minoxidil	0	0	0	0
Valine	Amino Acid			Loratadine	Drugs-Antihistamines	3.79747	3.79747			Rabenzazole	Pesticides-Fungicides	48.1013								Mono(2-ethyl-5-oxohexyl)phthalate	44	44	0	0			Mono(2-ethyl-5-oxohexyl)phthalate	44	44	0	0
3-Dehydrocholic acid	Bile acid			Matrine	Pesticides-Insecticides	3.79747	3.79747			Terbucarb	Pesticides-Herbicides	50.6329								Monoethyl phthalate	18	0	0	18			Monoethyl phthalate	17	0	0	17
4-cholesten-7alpha,24S-diol-3-one	Bile acid			Methicillin	Drugs-Antimicrobial Agents	3.79747	2.53165			PFOS	Pollutants-PFASs	54.4304								Moxifloxacin	1	1	0	0			Moxifloxacin	1	1	0	0
7.alpha.-Hydroxy-3-oxo-4-cholestenoic acid	Bile acid			Nicarbazin	Drugs-Antimicrobial Agents	3.79747	3.79747			Diethyltoluamide	Pollutants-Others	55.6962								Myclobutanil	2	0	2	0			Myclobutanil	2	0	2	0
7-Ketolithocholic acid	Bile acid			Prochloraz desimidazole-formylamino	Pesticides-Fungicides	3.79747	2.53165			5-Oxo-MEHP	Pollutants-Others	55.6962								Naphthol Yellow S	1	1	0	0			Naphthol Yellow S	0	0	0	0
Chenodeoxycholic acid	Bile acid			Trioxone	Pesticides-Fungicides	2.53165	2.53165			Quinoxyfen	Pesticides-Fungicides	55.6962								Nicarbazin	3	3	0	0			Nicarbazin	3	3	0	0
Cholic acid	Bile acid			Sulisobenzone	Pollutants-UV Absorbers	2.53165	2.53165			RhodamineB	Pollutants-Dyes	58.2278								Nicotine	79	0	70	9			Nicotine	79	0	70	9
Glycochenodeoxycholic acid	Bile acid			Boscalid	Pesticides-Fungicides	2.53165	1.26582			Fipronil-sulfide	Pesticides-Insecticides	59.4937								Nifedipine	2	0	0	2			Nifedipine	2	0	0	2
Glycocholic acid	Bile acid			Cetirizine	Drugs-Antihistamines	2.53165	2.53165			PFHps	Pollutants-PFASs	62.0253								Nitrendipine	1	1	0	0			Nitrendipine	1	1	0	0
Glycohyodeoxycholic acid	Bile acid			Chlorantraniliprole	Pesticides-Fungicides	2.53165	-			Tebufenozide	Pesticides-Insecticides	65.8228								Norfloxacin	4	1	2	1			Norfloxacin	4	1	2	1
Glycoursodeoxycholic acid	Bile acid			Dimefuron	Pesticides-Herbicides	2.53165	2.53165			tBPDP	Pollutants-Organic Flame Retardants	68.3544								Noscapine	2	2	0	0			Noscapine	2	2	0	0
ST 24:2;O3;S	Bile acid			Erythromycin	Drugs-Antimicrobial Agents	2.53165	2.53165			Ketorolac	Drugs-Anti-inflammatory drugs	70.8861								Paclobutrazol	1	1	0	0			Paclobutrazol	1	1	0	0
Sulfoglycolithocholic acid	Bile acid			Ethylparaben	Drugs-Additives	2.53165	-			17-OHPC	Drugs-Hormones	77.2152								Pentacosafluorotridecanoic acid	76	76	0	0			Pentacosafluorotridecanoic acid	73	73	0	0
Taurochenodeoxycholic acid	Bile acid			Fensulfothion-Sulfone	Pesticides-Insecticides	2.53165	2.53165			PFDoA	Pollutants-PFASs	82.2785								Perfluorodecanoic acid	77	15	38	24			Perfluorodecanoic acid	72	10	38	24
Taurocholic acid	Bile acid			Irbesartan	Drugs-Others	2.53165	2.53165			Testosterone	Drugs-Hormones	82.2785								Perfluorododecanoic acid	79	79	0	0			Perfluorododecanoic acid	65	65	0	0
Ursodeoxycholic acid	Bile acid			Metformin	Drugs-Others	2.53165	2.53165			Chlorferone	Pesticides-Insecticides	88.6076								Perfluoroheptanesulfonic acid	51	10	36	5			Perfluoroheptanesulfonic acid	49	8	36	5
(S)-2-hydroxy-3-(1H-imidazol-4-yl)propanoic acid	Carboxylic acid			Myclobutanil	Pesticides-Fungicides	2.53165	2.53165			PFDA	Pollutants-PFASs	91.1392								Perfluoroheptanoic acid	79	77	2	0			Perfluoroheptanoic acid	79	77	2	0
12-Hydroxyjasmonic acid	Carboxylic acid			Nifedipine	Drugs-Others	2.53165	2.53165			PFTrDA	Pollutants-PFASs	92.4051								Perfluorohexanesulfonate (PFHxS)	79	3	19	57			Perfluorohexanesulfonate (PFHxS)	79	3	19	57
2,2-Dimethylsuccinic acid	Carboxylic acid			Noscapine	Drugs-Others	2.53165	2.53165			17-OHP	Drugs-Hormones	93.6709								Perfluorononanoic acid	79	5	24	50			Perfluorononanoic acid	78	4	24	50
2,3-Dihydroxy-2-methylbutanoic acid	Carboxylic acid			Phenylbutazone	Drugs-Anti-inflammatory drugs	2.53165	2.53165			Lufenuron	Pesticides-Insecticides	93.6709								Perfluorooctanesulfonate (PFOS)	51	0	0	51			Perfluorooctanesulfonate (PFOS)	43	0	0	43
20-Hydroxyarachidonic acid	Carboxylic acid			Spirotetramat-enol	Pesticides-Insecticides	2.53165	1.26582			BHT alcohol	Pollutants-UV Absorbers	97.4684								Perfluorooctanoic acid	79	0	2	77			Perfluorooctanoic acid	79	0	2	77
2-Aminoadipic acid	Carboxylic acid			2-Ethylhexyl 4-(dimethylamino)benzoate	Pollutants-UV Absorbers	1.26582	-			DNOC	Pollutants-Phenols	98.7342								Perfluoroundecanoic acid	79	21	36	22			Perfluoroundecanoic acid	79	21	36	22
2-Hydroxy-6-methylnicotinic acid	Carboxylic acid			CCIM	Pesticides-Fungicides	1.26582	1.26582			PFNA	Pollutants-PFASs	98.7342								Phenylbutazone	2	1	0	1			Phenylbutazone	2	1	0	1
2-Hydroxyglutaric acid	Carboxylic acid			Amlodipine besylate	Drugs-Others	1.26582	1.26582			6:2 diPAP	Pollutants-PFASs	98.7342								Pioglitazone hydrochloride	12	12	0	0			Pioglitazone hydrochloride	8	8	0	0
2-keto-3-deoxy-nononic acid	Carboxylic acid			Brombuterol	Drugs-Adrenal receptor drugs	1.26582	1.26582			Fipronil sulfone	Pesticides-Insecticides	98.7342								Prednisolone	1	0	0	1			Prednisolone	1	0	0	1
2-Methylcitric acid	Carboxylic acid			Carbamazepine	Drugs-Others	1.26582	1.26582			Isonoruron	Pesticides-Herbicides	98.7342								Prochloraz desimidazole-formylamino	3	3	0	0			Prochloraz desimidazole-formylamino	2	2	0	0
2-Methyllactic acid	Carboxylic acid			Cycluron	Pesticides-Herbicides	1.26582	1.26582			Thiacloprid	Pesticides-Insecticides	98.7342								Prochloraz-desimidazole-amino	4	4	0	0			Prochloraz-desimidazole-amino	2	2	0	0
2-Phenylpropionic acid	Carboxylic acid			Estrone	Drugs-Hormones	1.26582	1.26582			4-Nitro-3-cresol	Pesticides-Insecticides	100								Progesterone	25	19	2	4			Progesterone	11	5	2	4
3-(1H-imidazol-4-yl)propanoic acid	Carboxylic acid			Flufenoxuron	Pesticides-Insecticides	1.26582	1.26582			Androstenedione	Drugs-Hormones	100								Promethazine	1	1	0	0			Promethazine	1	1	0	0
3-(3,4-dimethoxyphenyl) propionic acid	Carboxylic acid			Flumequine	Drugs-Antimicrobial Agents	1.26582	-			9Cl-PF3ONS	Pollutants-PFASs	100								Pyraclostrobin	8	8	0	0			Pyraclostrobin	3	3	0	0
3-Amino-5-hydroxybenzoic acid	Carboxylic acid			Fluopyram	Pesticides-Fungicides	1.26582	1.26582			Cyclamic acid	Drugs-Additives	100								Pyrazophos	1	1	0	0			Pyrazophos	0	0	0	0
3-Aminobutanoic acid	Carboxylic acid			Fluxapyroxad	Pesticides-Fungicides	1.26582	1.26582			Dazomet	Pesticides-Fungicides	100								Quinocetone	11	11	0	0			Quinocetone	3	3	0	0
3-Furoic acid	Carboxylic acid			Glyburide	Drugs-Others	1.26582	1.26582			Fipronil	Pesticides-Insecticides	100								Quinoxyfen	44	44	0	0			Quinoxyfen	44	44	0	0
3-Hydroxy-2-octylpentanedioic acid	Carboxylic acid			Hexestrol	Drugs-Hormones	1.26582	1.26582			Isopyrazam	Pesticides-Fungicides	100								Rabenzazole	67	67	0	0			Rabenzazole	38	38	0	0
3-Oxopentanoic acid	Carboxylic acid			Isocarbophos	Pesticides-Insecticides	1.26582	1.26582			Nicotine	Drugs-Others	100								Resmethrin	1	1	0	0			Resmethrin	1	1	0	0
4-COUMARATE	Carboxylic acid			Isoxaflutole	Pesticides-Herbicides	1.26582	1.26582			PFHpA	Pollutants-PFASs	100								RhodamineB	79	77	2	0			RhodamineB	46	44	2	0
4-Hydroxybenzoic acid	Carboxylic acid			Mebendazole-amine	Drugs-Antimicrobial Agents	1.26582	1.26582			PFHxS	Pollutants-PFASs	100								Roxithromycin	8	7	0	1			Roxithromycin	8	7	0	1
4-Oxononanoic acid	Carboxylic acid			Mecoprop	Pesticides-Fungicides	1.26582	1.26582			PFOA	Pollutants-PFASs	100								Salmeterol	11	11	0	0			Salmeterol	1	1	0	0
4-Pyridoxic acid	Carboxylic acid			Minoxidil	Drugs-Others	1.26582	-			PFUdA	Pollutants-PFASs	100								Secbumeton	1	1	0	0			Secbumeton	0	0	0	0
5-Hete lactone	Carboxylic acid			Moxifloxacin	Drugs-Antimicrobial Agents	1.26582	1.26582													Sethoxydim	1	1	0	0			Sethoxydim	1	1	0	0
6-[(2,4-Dinitrophenyl)amino]hexanoic acid	Carboxylic acid			Naphthol Yellow S	Pollutants-Dyes	1.26582	-													Siduron	6	6	0	0			Siduron	1	1	0	0
9,10-Dihydrojasmonic acid	Carboxylic acid			Nitrendipine	Drugs-Others	1.26582	1.26582													Simeconazole	1	1	0	0			Simeconazole	1	1	0	0
9-Methoxycarbonyldec-9-enoic acid	Carboxylic acid			Paclobutrazol	Pesticides-Others	1.26582	1.26582													Spirotetramat-enol	2	2	0	0			Spirotetramat-enol	1	1	0	0
Aconitic acid	Carboxylic acid			Prednisolone	Drugs-Hormones	1.26582	1.26582													Sulfanitran	1	1	0	0			Sulfanitran	1	1	0	0
alpha Amino 3 hydroxy 5 methyl 4 isoxazolepropionic Acid	Carboxylic acid			Promethazine	Drugs-Antihistamines	1.26582	1.26582													Sulfoaildenafil	1	1	0	0			Sulfoaildenafil	1	1	0	0
Aminolevulinic Acid	Carboxylic acid			Pyrazophos	Pesticides-Insecticides	1.26582	-													Sulfoxaflor	4	4	0	0			Sulfoxaflor	4	4	0	0
Anthranilic acid	Carboxylic acid			Resmethrin	Pesticides-Insecticides	1.26582	1.26582													Tadalafil	1	0	0	1			Tadalafil	1	0	0	1
Azelaic acid	Carboxylic acid			Secbumeton	Pesticides-Herbicides	1.26582	-													Tebuconazole	5	4	1	0			Tebuconazole	2	1	1	0
Calcium pantothenate	Carboxylic acid			Sethoxydim	Pesticides-Herbicides	1.26582	1.26582													Tebufenozide	52	52	0	0			Tebufenozide	52	52	0	0
Cinnamic acid	Carboxylic acid			Simeconazole	Pesticides-Fungicides	1.26582	1.26582													Terbucarb	79	79	0	0			Terbucarb	40	40	0	0
Citramalic acid	Carboxylic acid			Sulfanitran	Drugs-Antimicrobial Agents	1.26582	1.26582													tert-Butylphenyl diphenyl phosphate	79	79	0	0			tert-Butylphenyl diphenyl phosphate	54	54	0	0
Citric Acid	Carboxylic acid			Sulfoaildenafil	Drugs-Others	1.26582	1.26582													Testosterone	70	6	23	41			Testosterone	65	3	21	41
CMPF	Carboxylic acid			Tadalafil	Drugs-Hormones	1.26582	1.26582													Thiacloprid	78	78	0	0			Thiacloprid	78	78	0	0
Creatinine	Carboxylic acid			Thiobencarb	Pesticides-Insecticides	1.26582	1.26582													Thiobencarb	1	1	0	0			Thiobencarb	1	1	0	0
Curvulin	Carboxylic acid			Tolbutamide	Drugs-Others	1.26582	1.26582													Tolbutamide	1	1	0	0			Tolbutamide	1	1	0	0
D-2-Aminobutyric acid	Carboxylic acid			Trimethoprim	Drugs-Antimicrobial Agents	1.26582	1.26582													Trimethoprim	1	0	1	0			Trimethoprim	1	0	1	0
Daidzein	Carboxylic acid
Ecgonine	Carboxylic acid
Ectoine	Carboxylic acid
Ethyl 3,4-dihydroxybenzoate	Carboxylic acid
Fumaric acid	Carboxylic acid
Gamma-Aminobutyric Acid	Carboxylic acid
Gluconic acid	Carboxylic acid
Glucuronic acid	Carboxylic acid
Glyceric acid	Carboxylic acid
Hippuric acid	Carboxylic acid
Homovanillic Acid	Carboxylic acid
Hydantoin-5-propionic acid	Carboxylic acid
Hymeglusin	Carboxylic acid
Hypotaurine	Carboxylic acid
Indoxyl glucuronide	Carboxylic acid
Kynurenic acid	Carboxylic acid
Kynurenine	Carboxylic acid
Lichesterinic acid	Carboxylic acid
L-Malic acid	Carboxylic acid
Meglutol	Carboxylic acid
Methyl arachidonate	Carboxylic acid
Methylimidazoleacetic acid	Carboxylic acid
Mevalonic acid 5-pyrophosphate	Carboxylic acid
[truncated: 587 more rows]

## Sheet: Fig.6
Figure 6a						Figure 6b						Figure 6c																	Figure 6d
[truncated: 31 more rows]

[truncated: 8 more sheets: Fig.S2, Fig.S3, Fig.S4, Fig.S5, Fig.S6, Fig.S7, Fig.S8, Fig.S9]
