# Supplementary material for: A column-switching two-dimensional liquid chromatography - high resolution/triple quadrupole dual mass spectrometry system for simultaneously untargeted metabolome and targeted exposome analyses
Source: Research Square preprint supplement (doi:10.21203/rs.3.rs-5820559/v1), 2025-02-03
Supplement: Supplementary file 3 [file 3e1104c69db5afb46d4a4f31.docx]

**Supplementary Information**

**A column-switching two-dimensional liquid chromatography - high resolution/triple quadrupole dual mass spectrometry system for** **simultaneously untargeted metabolome and targeted exposome analyses**

Yuting Wanga,b,c, Penglong Caod, Pengwei Guana,b,c, Tiantian Chena,b, Xingyu Guoa,b,c, Xianzhe Shia,c, Xinyu Liua,c*, Guowang Xua,b,c*

a State Key Laboratory of Medical Proteomics, CAS Key Laboratory of Separation Science for Analytical Chemistry, Dalian Institute of Chemical Physics, Chinese Academy of Sciences, Dalian 116023, China

b University of Chinese Academy of Sciences, Beijing 100049, China

c Liaoning Province Key Laboratory of Metabolomics, Dalian, China

d The First Affiliated Hospital of Dalian Medical University, Dalian, China

* Corresponding Authors:

Prof. Dr. Guowang Xu, CAS Key Laboratory of Separation Science for Analytical Chemistry, Dalian Institute of Chemical Physics, Chinese Academy of Sciences, Dalian 116023, China. Phone:/Fax: 0086-411-84379530. e-mail: xugw@dicp.ac.cn

Prof. Dr. Xinyu Liu, CAS Key Laboratory of Separation Science for Analytical Chemistry, Dalian Institute of Chemical Physics, Chinese Academy of Sciences, Dalian, 116023, China. Tel.: +86-0411-84379757. E-mail: liuxy2012@dicp.ac.cn.

**Contents**

[Supplementary Results S3](#_Toc186810339)

Supplementary Result 1. [Method validation of metabolites S3](#_Toc186810340)

Supplementary Result 2. [Method validation of chemical exposures S3](#_Toc186810341)

Supplementary Result 3. [Sample analysis reliability monitoring S4](#_Toc186810342)

Supplementary Result 4. [Metabolic change and chemical residues profiling of IBD S5](#_Toc186810343)

[Supplementary Figures S7](#_Toc186810344)

[Supplementary Figure 1. Flow scheme of the column switching 2DLC method. S7](#_Toc186810345)

[Supplementary Figure 2. Chromatographic column separation effect of different log P compounds. S8](#_Toc186810346)

[Supplementary Figure 3. Separation effect of developed 2DLC system compared with 1DLC. S9](#_Toc186810347)

[Supplementary Figure 4. Method validation results of 2DLC-HR/TQMS method. S10](#_Toc186810348)

[Supplementary Figure 5. Comparison of the number of compounds annotated by three LC systems (2DLC, RPLC and HILIC) in tissue and urine. S11](#_Toc186810349)

[Supplementary Figure 6. Metabolome profiling of hyperlipidemia samples. S12](#_Toc186810350)

[Supplementary Figure 7. Metabolome profiling of UC and CD samples. S13](#_Toc186810351)

[Supplementary Figure 8. Unique metabolome profiling of UC and CD samples. S14](#_Toc186810352)

[Supplementary Figure 9. Concentration levels of serum chemical exposures in Ctrl, UC and CD groups. S15](#_Toc186810353)

[Supplementary Tables S16](#_Toc186810354)

[Supplementary Table 1. Basic sample information of the chronic disease cohort. S16](#_Toc186810355)

Supplementary Results

Supplementary Result 1. Method validation of metabolites

For method evaluation of metabolites in **Supplementary Data 5**, the linear range of the 21 isotopically labeled metabolites spanned more than 1-3 orders of magnitude, and the linear regression coefficients (R2) were between 0.9932-0.9992. LLOQ and ULOQ were defined as the concentrations of the lowest point with accuracy between 80% to 120% and biggest point at the linear curve. The LLODs were 0.64-300.26 ng/mL in our experiment, showing great analysis sensitivity similar to those metabolite methods based on HRMS reported so far 1, 2. Analysis results of 6 replicate spiked serums in parallel (n=6) at each concentration level were corrected by the corresponding internal calibration curves to calculate the accuracy. All compounds had accuracies of 80-120%, except for SM d18:1/12:0 having accuracy of 65.9% at 646.5 ng/mL and 77.5 at 3232.5 ng/mL. For the extraction recovery, serum QCs spiked before and after extraction at the above low, medium, and high concentration levels (n=4 at each concentration level) were analyzed, respectively. It showed that all compounds had extraction recoveries ranging from 80-120% with RSD less than 15% except for LPC 19:0. For precision, RSD values ​​of the peak areas of the analytes detected in 6 serum samples analyzed in one day and a total of 18 serum samples analyzed on three consecutive days were calculated. As shown in **Supplementary Fig. 4a and c**, at least 89% of the analytes had intra-day RSD less than 30%, accounting for 93%-98% of the total peak area; more than 89% of the analytes had inter-day RSD less than 30%, accounting for 91%-95% of the total peak area. Collectively, the overall results showed that 2D-LC-MS untargeted metabolome method had good linearity, sensitivity, accuracy, extraction recoveries and precision.

Supplementary Result 2. Method validation of chemical exposures

For method evaluation of targeted exposomes, except for another 24 compounds that were not available in mixed standard solutions, the remaining 574 exposures were used for testing the detection properties including precision, extraction recovery and LOD (**Supplementary Data 6**). For precision, RSD values ​​were calculated based on the analytes of 6 spiked fetal bovine serum samples analyzed in one day and a total of 18 samples analyzed on three consecutive days across three concentration levels: low (0.5 ng/mL), medium (5 ng/mL) and high (50 ng/mL). As shown in **Supplementary** **Fig. 4b**, intra-day precision for analytes with RSD less than 15% was achieved for 98%, 98.3%, and 99% of the compounds at low, medium, and high concentration levels, respectively. Correspondingly, inter-day precision reached 98%, 97.6%, and 98.6% at these concentration levels. Extraction recovery was also evaluated at the above low, medium, and high concentration levels (n=4 at each concentration level) based on fetal bovine serum spiked before and after extraction. It was found that exposures had extraction recovery rates between 80% and 120%, and the number of exposures with an extraction recovery under 80% increased gradually with decreasing spiked concentration (**Supplementary** **Fig. 4d**). LOD was defined as the concentrations of the three times of signal-to-noise ratio. As shown in **Supplementary** **Fig. 4e**, the LODs of most exposures were between 0.005 and 0.05, signifying the method's exceptional sensitivity for residue detection. In order to evaluate the quantification properties of the targeted exposome detection method, 145 exposures were used to perform evaluations of linearity, LLOQ, ULOQ, and accuracy (**Supplementary Data 7**) in spiked fetal bovine serum. The linear range of the 145 exposures spanned more than 1-4 orders of magnitude, and the linear regression coefficients (R2) were between 0.9932-0.9992. The LLOD of the exposures ranged from 0.001 to 2.5 ng/mL, with 83% of the exposures having a LLOD less than 0.25 ng/mL, showing greater analysis sensitivity. Accuracies of low (0.5 ng/mL), medium (5 ng/mL) and high (50 ng/mL) concentrations were calculated after being calibrated with the internal standard calibration curve. Most exposures had accuracy of 80-120% except for little exposures at a certain concentration. Overall, the results indicate that the targeted exposure detection mode in the 2DLC-HR/TQMS method established in this study also displayed excellent linearity, sensitivity, accuracy, extraction recoveries and precision.

Supplementary result 3. Sample analysis reliability monitoring

In this study, a total of 79 serum samples from chronic disease patients were analyzed by the HILIC/RPLC column switching 2DLC-HRMS/TQMS method. To ensure the quality of the analysis, a quality control (QC) sample, a standard mixed solution, and a blank sample were inserted after every 10 samples were analyzed. The QC sample and the standard mixed solution including Car C6:0 and Car C8:0 was respectively used to monitor the stability of the entire experiment and 2DLC fraction cutting. For the stability evaluation of the QC samples, 95.7% of the metabolites were semi-quantitative with RSD less than 20%, demonstrating the stability and reliability of the semi-quantitative results in the experiment (**Supplementary** **Fig. 6a**).

Supplementary Result 4. Metabolic change and chemical residues profiling of IBD

It is widely accepted that the occurrence of inflammatory bowel disease (IBD) involves complex interactions of genetic susceptibility, abnormal response of the immune system, environmental exposures factors, and imbalance of the intestinal microbiome 3-6. Metabolomics and exposomics have emerged as potent analytical platforms for further exploring the pathogenesis of IBD and identifying potential therapeutic targets 3, 7

38 serum samples of IBD patients, containing 27 ulcerative colitis (UC) and 11 Crohn's disease (CD) were included in the demonstration study based on column switching 2DLC-HRMS/TQMS method. PCA results showed that significant metabolic changes occurred in both UC patients and Crohn's patients compared with controls (**Supplementary** **Fig. 7a, b**). Through non-parametric test analysis, 108 and 106 metabolites were found significantly changed in UC group and CD group (p<0.05 and FDR<0.05). Differential metabolites with fold change less than 0.5 and greater than 2 were included in subsequent analysis and summarized in Table S11 (**Supplementary** **Fig. 7c, d**). 29 metabolites that changed synchronously in UC and CD group mainly involved upregulation of bile acids and peptides (**Supplementary** **Fig. 7e**). 12 metabolites exhibited differences only in UC vs. control group, with steroids being significantly lower in the UC group (**Supplementary** **Fig. 7f**). Steroids have been widely used to induce remission in patients with active IBD, especially in UC patients, suggesting that changes in steroid levels may be associated with disease activity in UC patients 8, 9. More unique metabolic perturbations took place in CD than in UC group. As shown in **Supplementary** **Fig. 8a**, a large number of metabolites including carnitine, fatty acids, PC and certain organic acids were significantly reduced in CD group, which were supported by another population-based study that observed significant differences in fatty acid, acylcarnitine metabolites in CD compared with UC or control subjects 10. Possible reasons are elevated energy expenditure caused by an active inflammatory state in IBD 11. All differential metabolites in UC and CD were significantly correlated with at least one differential chemical exposure, suggesting synchronized metabolic and chemical exposure changes in IBD patients. In pathway enrichment analysis (**Supplementary** **Fig. 8b, c**), metabolic alterations in UC and CD involved numerous shared amino acid and carboxylic acid biosynthesis and metabolism pathways, such as arginine, phenylalanine, tyrosine, tryptophan, histidine, and β-alanine, etc., with a higher enrichment and significance in the CD group. Alterations in tryptophan and its metabolites (e.g. deceasing indole acetic acid), which were influenced by microbial metabolism and involved in immune responses, were considered as a crucial role in the pathogenesis of IBD 7, 12. Furthermore, significant changes in taurine and hypotaurine metabolism occurred only in CD groups, with an enrichment exceeding 20%. In conclusion, distinct pathophysiological mechanisms were exhibited in UC and CD. Metabolic changes in CD may involve more intense metabolic perturbations and a wider range of metabolic pathways, including energy harvesting, resistance to pathogens, and host immune regulation. More robust metabolic perturbations and a wider range of metabolic pathways were involved in CD patients, encompassing maintenance of energy homeostasis, regulation of immune responses, and altered microbiota metabolism.

By the analysis of environmental exposures on IBD patients, compared to health controls, the levels of differential exposures in IBD patients were significantly lower (**Supplementary Data 13**). In particular, ten per- and polyfluoroalkyl substances (PFAS) were detected at particularly low concentrations in CD patients, with fold changes ranging from 0.17 to 0.68. This phenomenon may be related to the gastrointestinal dysfunction and bloody diarrhea commonly observed in IBD patients. It has been reported that mice with acute intestinal inflammation or patients with IBD exhibit reduced digestive enzyme activity and severe food intolerances13, 14, which may affect the absorption of PFAS from the gastrointestinal tract. On the other hand, Zhu et al.15 found that watery bloody stools were observed in mice from IBD group with reduced PFAS and speculated that PFAS may be excreted together with incompletely digested food, resulting in reduced levels. Unfortunately, PFOS levels in the feces of IBD patients were not measured in this study, preventing verification of this conjecture. Currently, research on the effects of environmental exposures on IBD was limited with inconsistent results. Further research was still required to explore the interaction between environmental exposures and IBD and possible underlying mechanisms.

Supplementary Figures


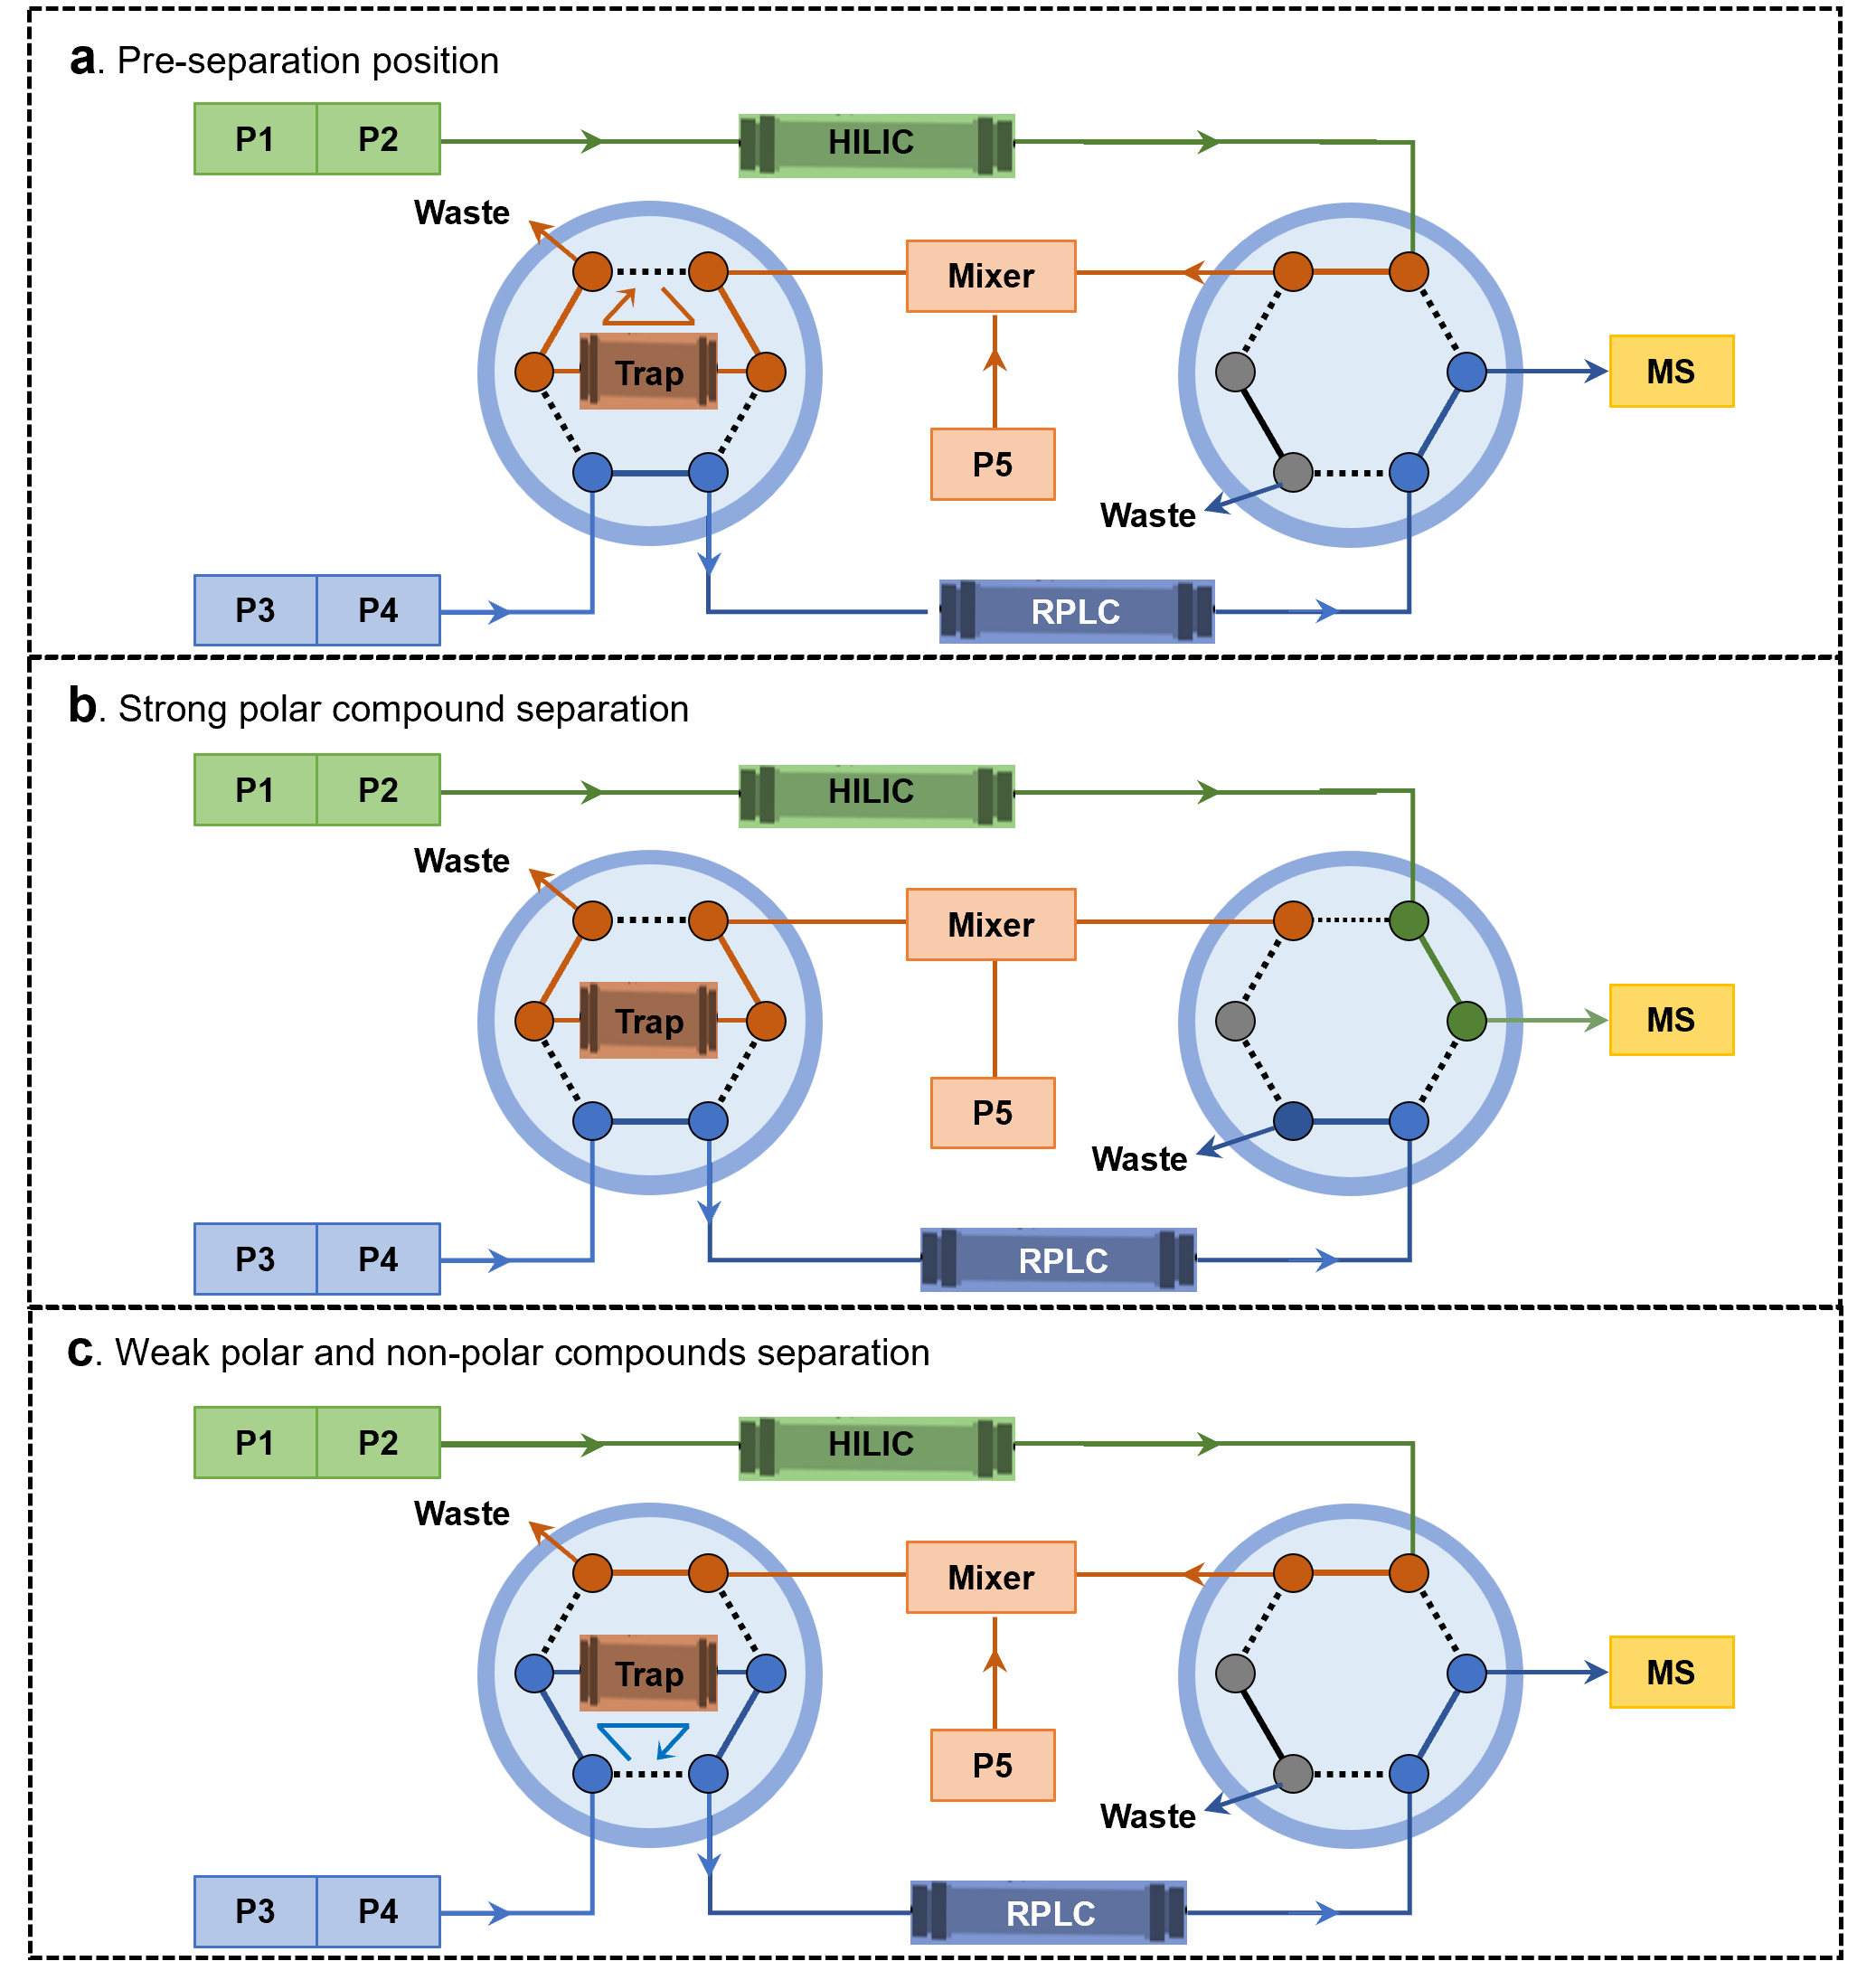


Supplementary Figure 1. Flow scheme of the column switching 2DLC method. **a** Pre-separation position. Weakly polar and non-polar compounds eluted nearly at dead time from HILIC column were pre-separated from polar ones and transferred onto trapping columns; **b** Strong polar compound separation. Polar compounds were separated on HILIC column; **c** Weak polar and non-polar compounds separation. Trapped weak polar and non-polar compounds were backflushed to RP column and analyzed.


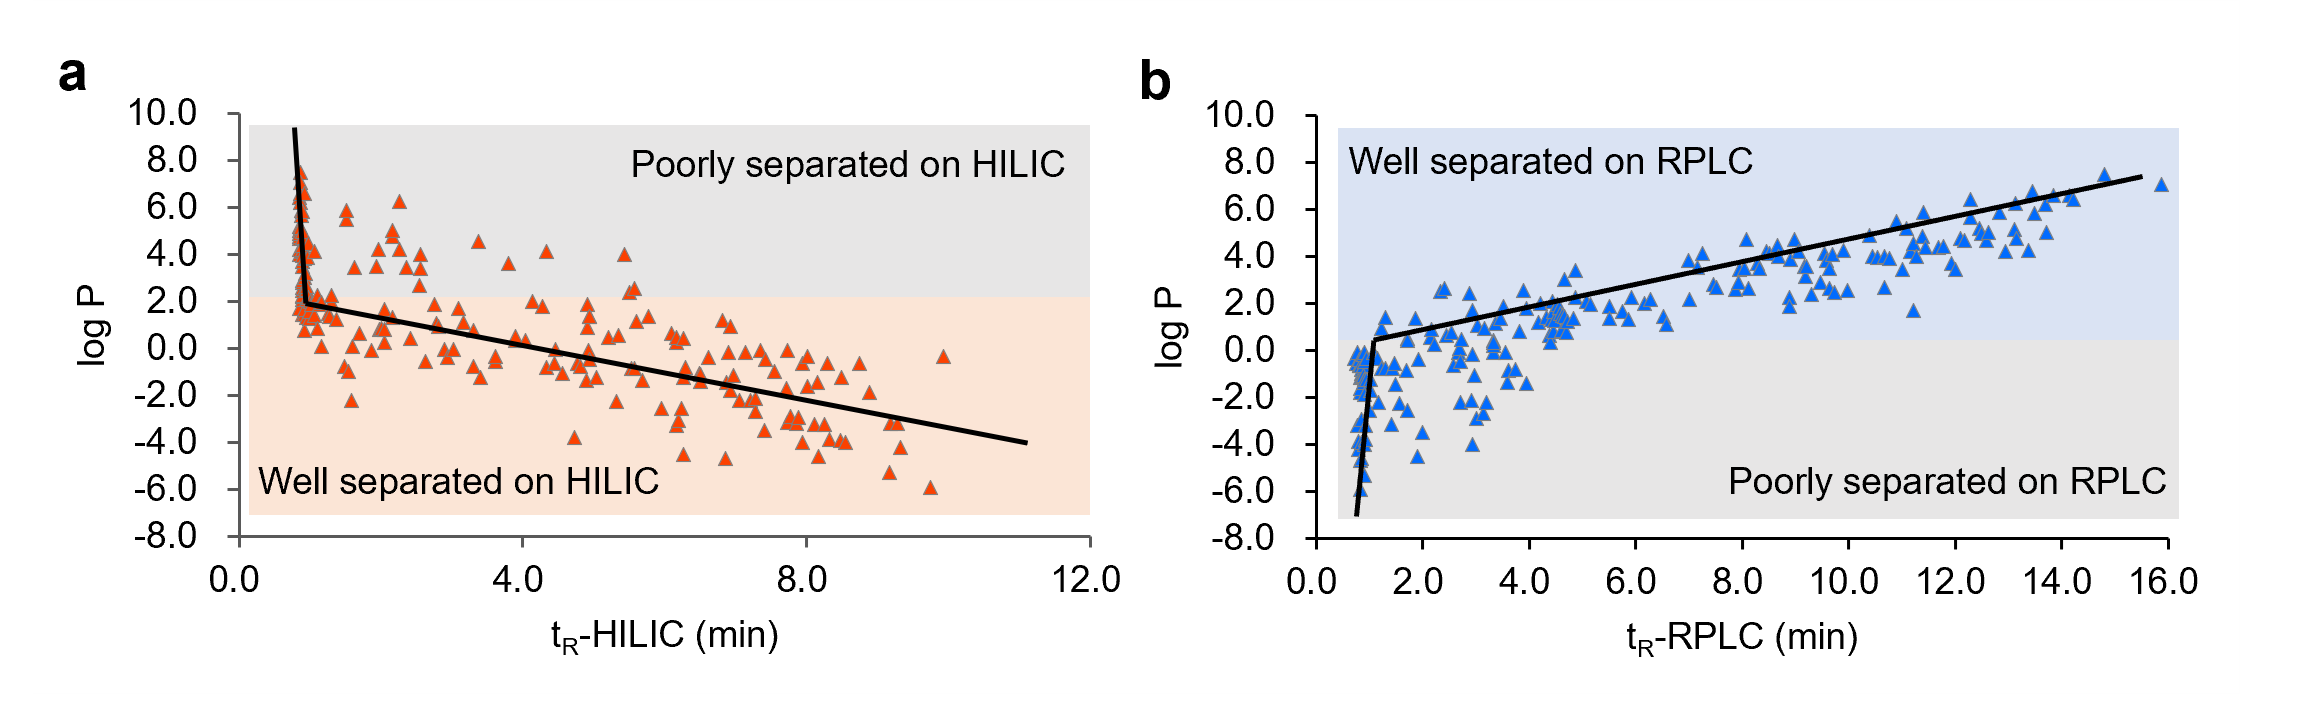


Supplementary Figure 2. Chromatographic separations of different log P compounds on different columns. **a** Scatter plot of the retention times of compounds with different log P on HILIC. **b** Scatter plot of the retention times of compounds with different log P on RPLC.


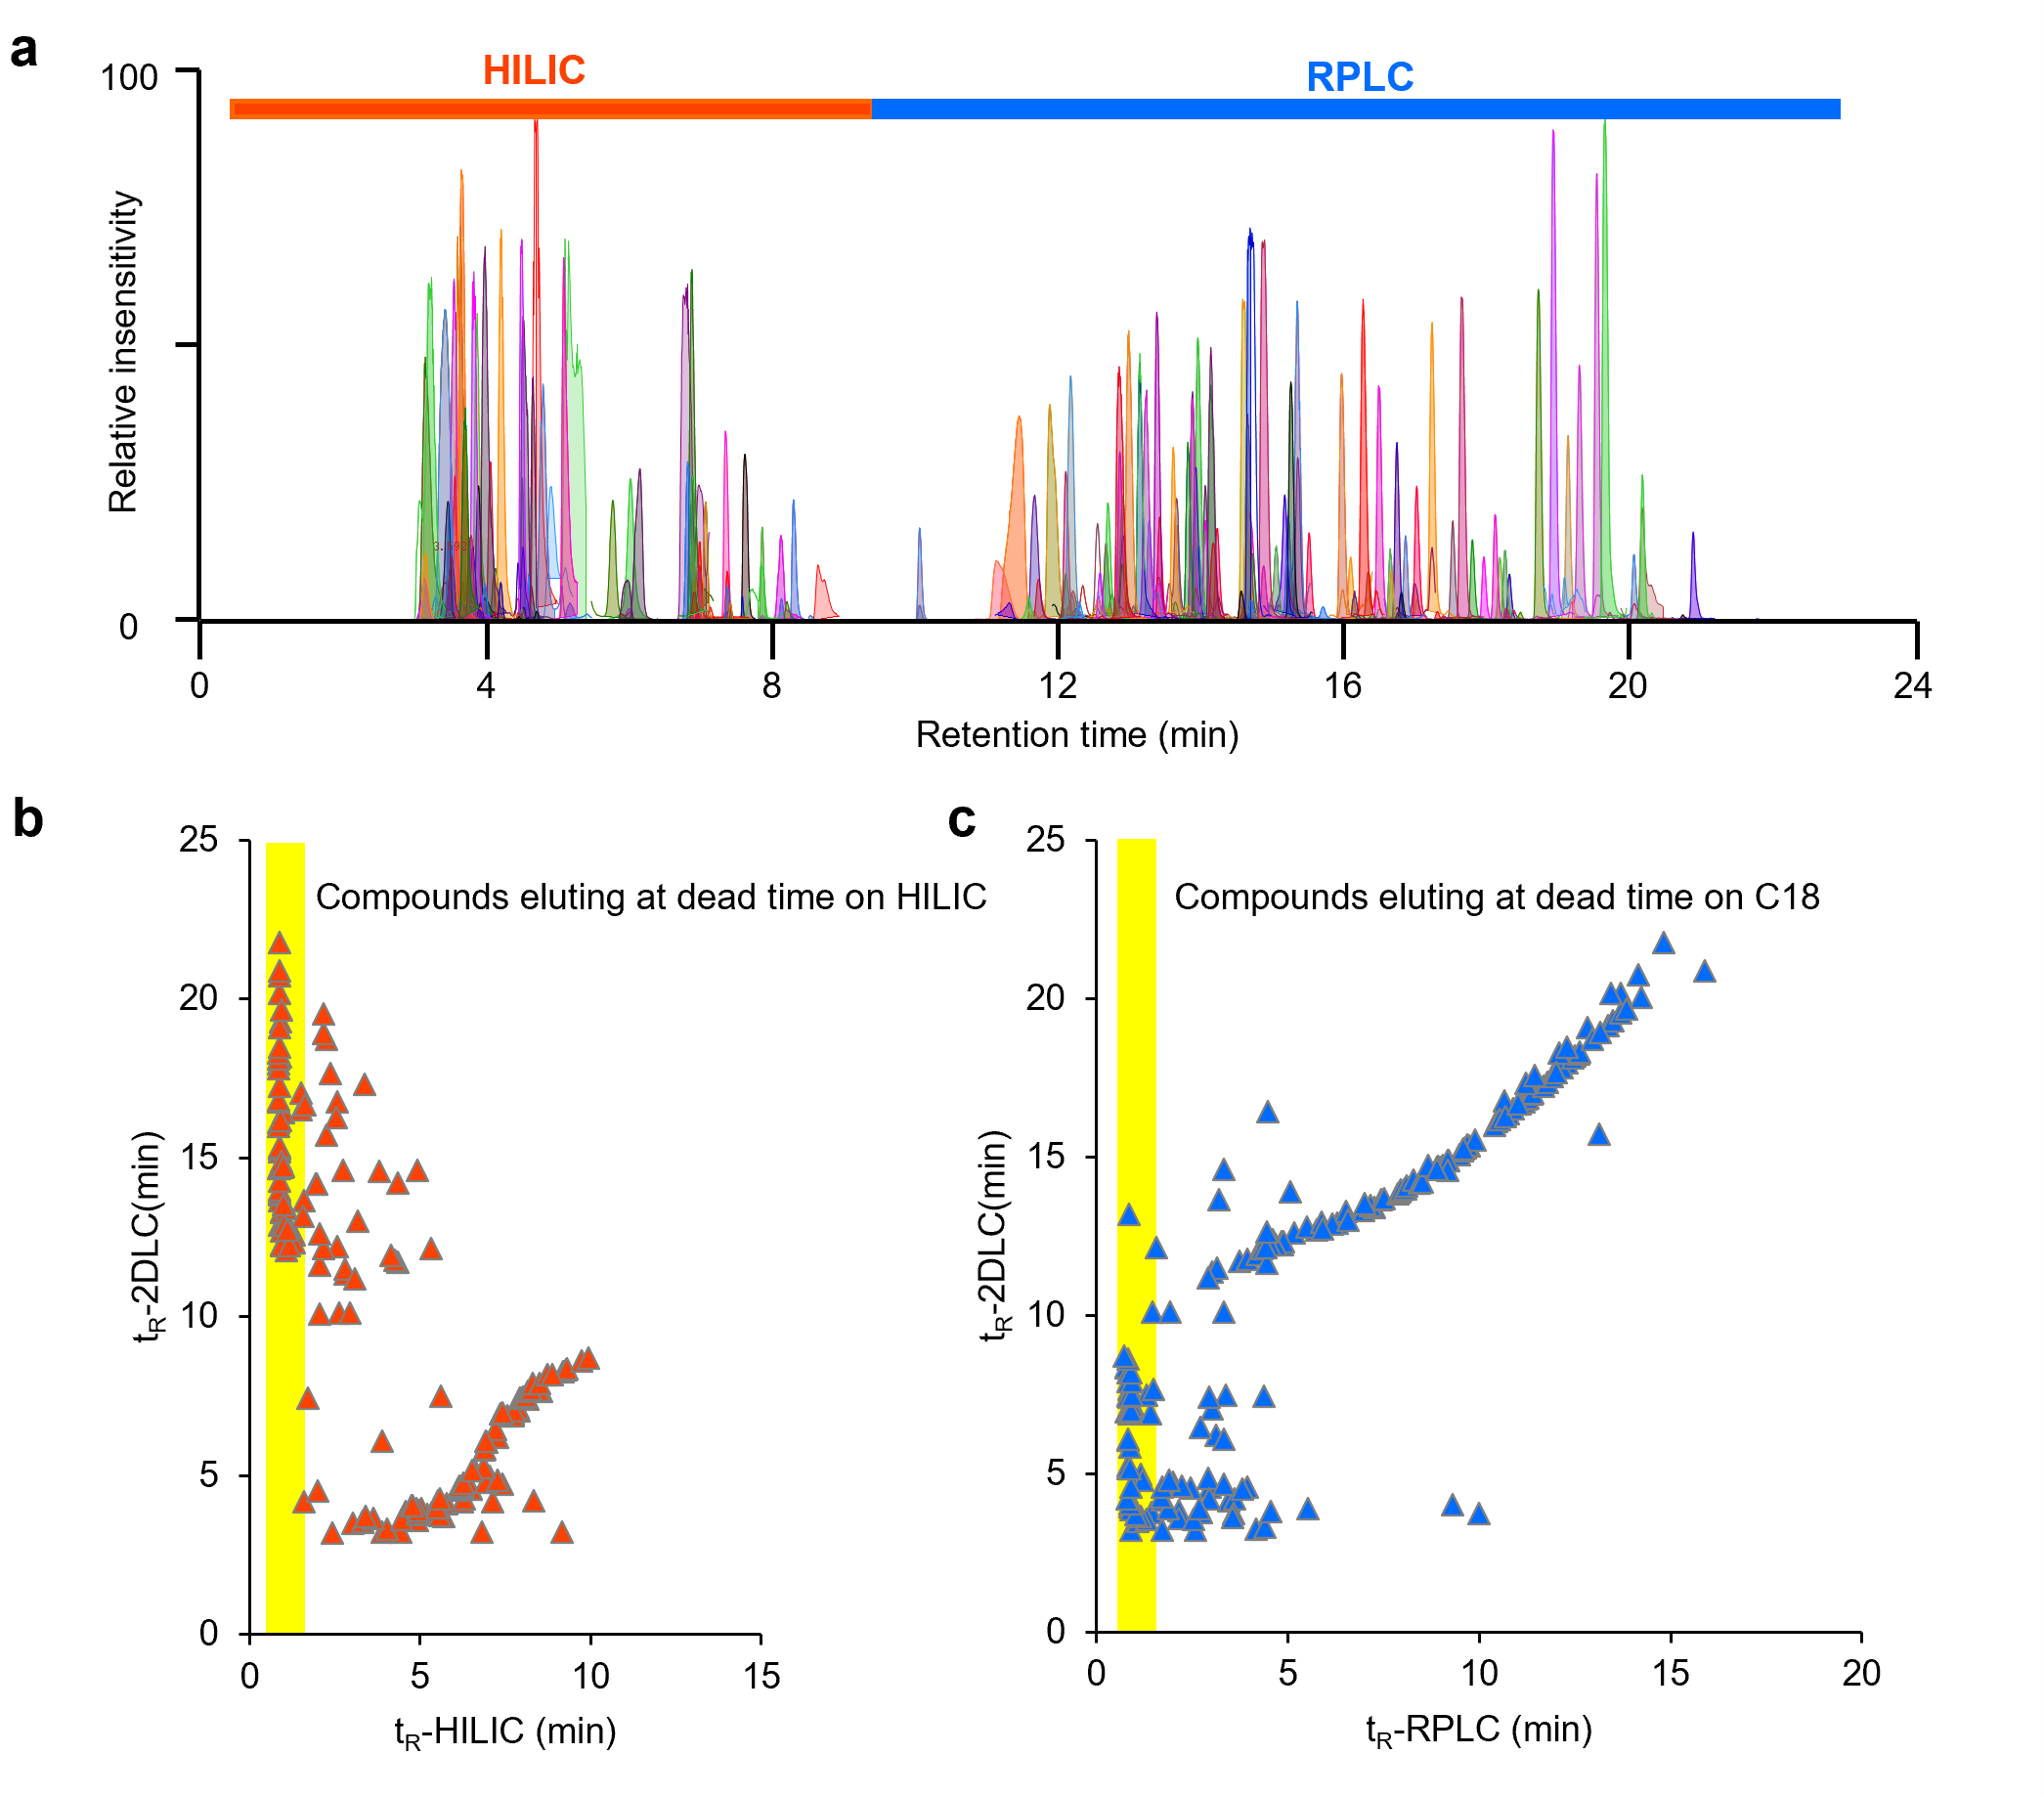


Supplementary Figure 3. Separationss on developed 2DLC system and 1DLC. **a** EIC of 221 standards on 2DLC. **b** Scatter plot of the retention time of HILIC and 2DLC. **c** Scatter plot of the retention time of RPLC and 2DLC.


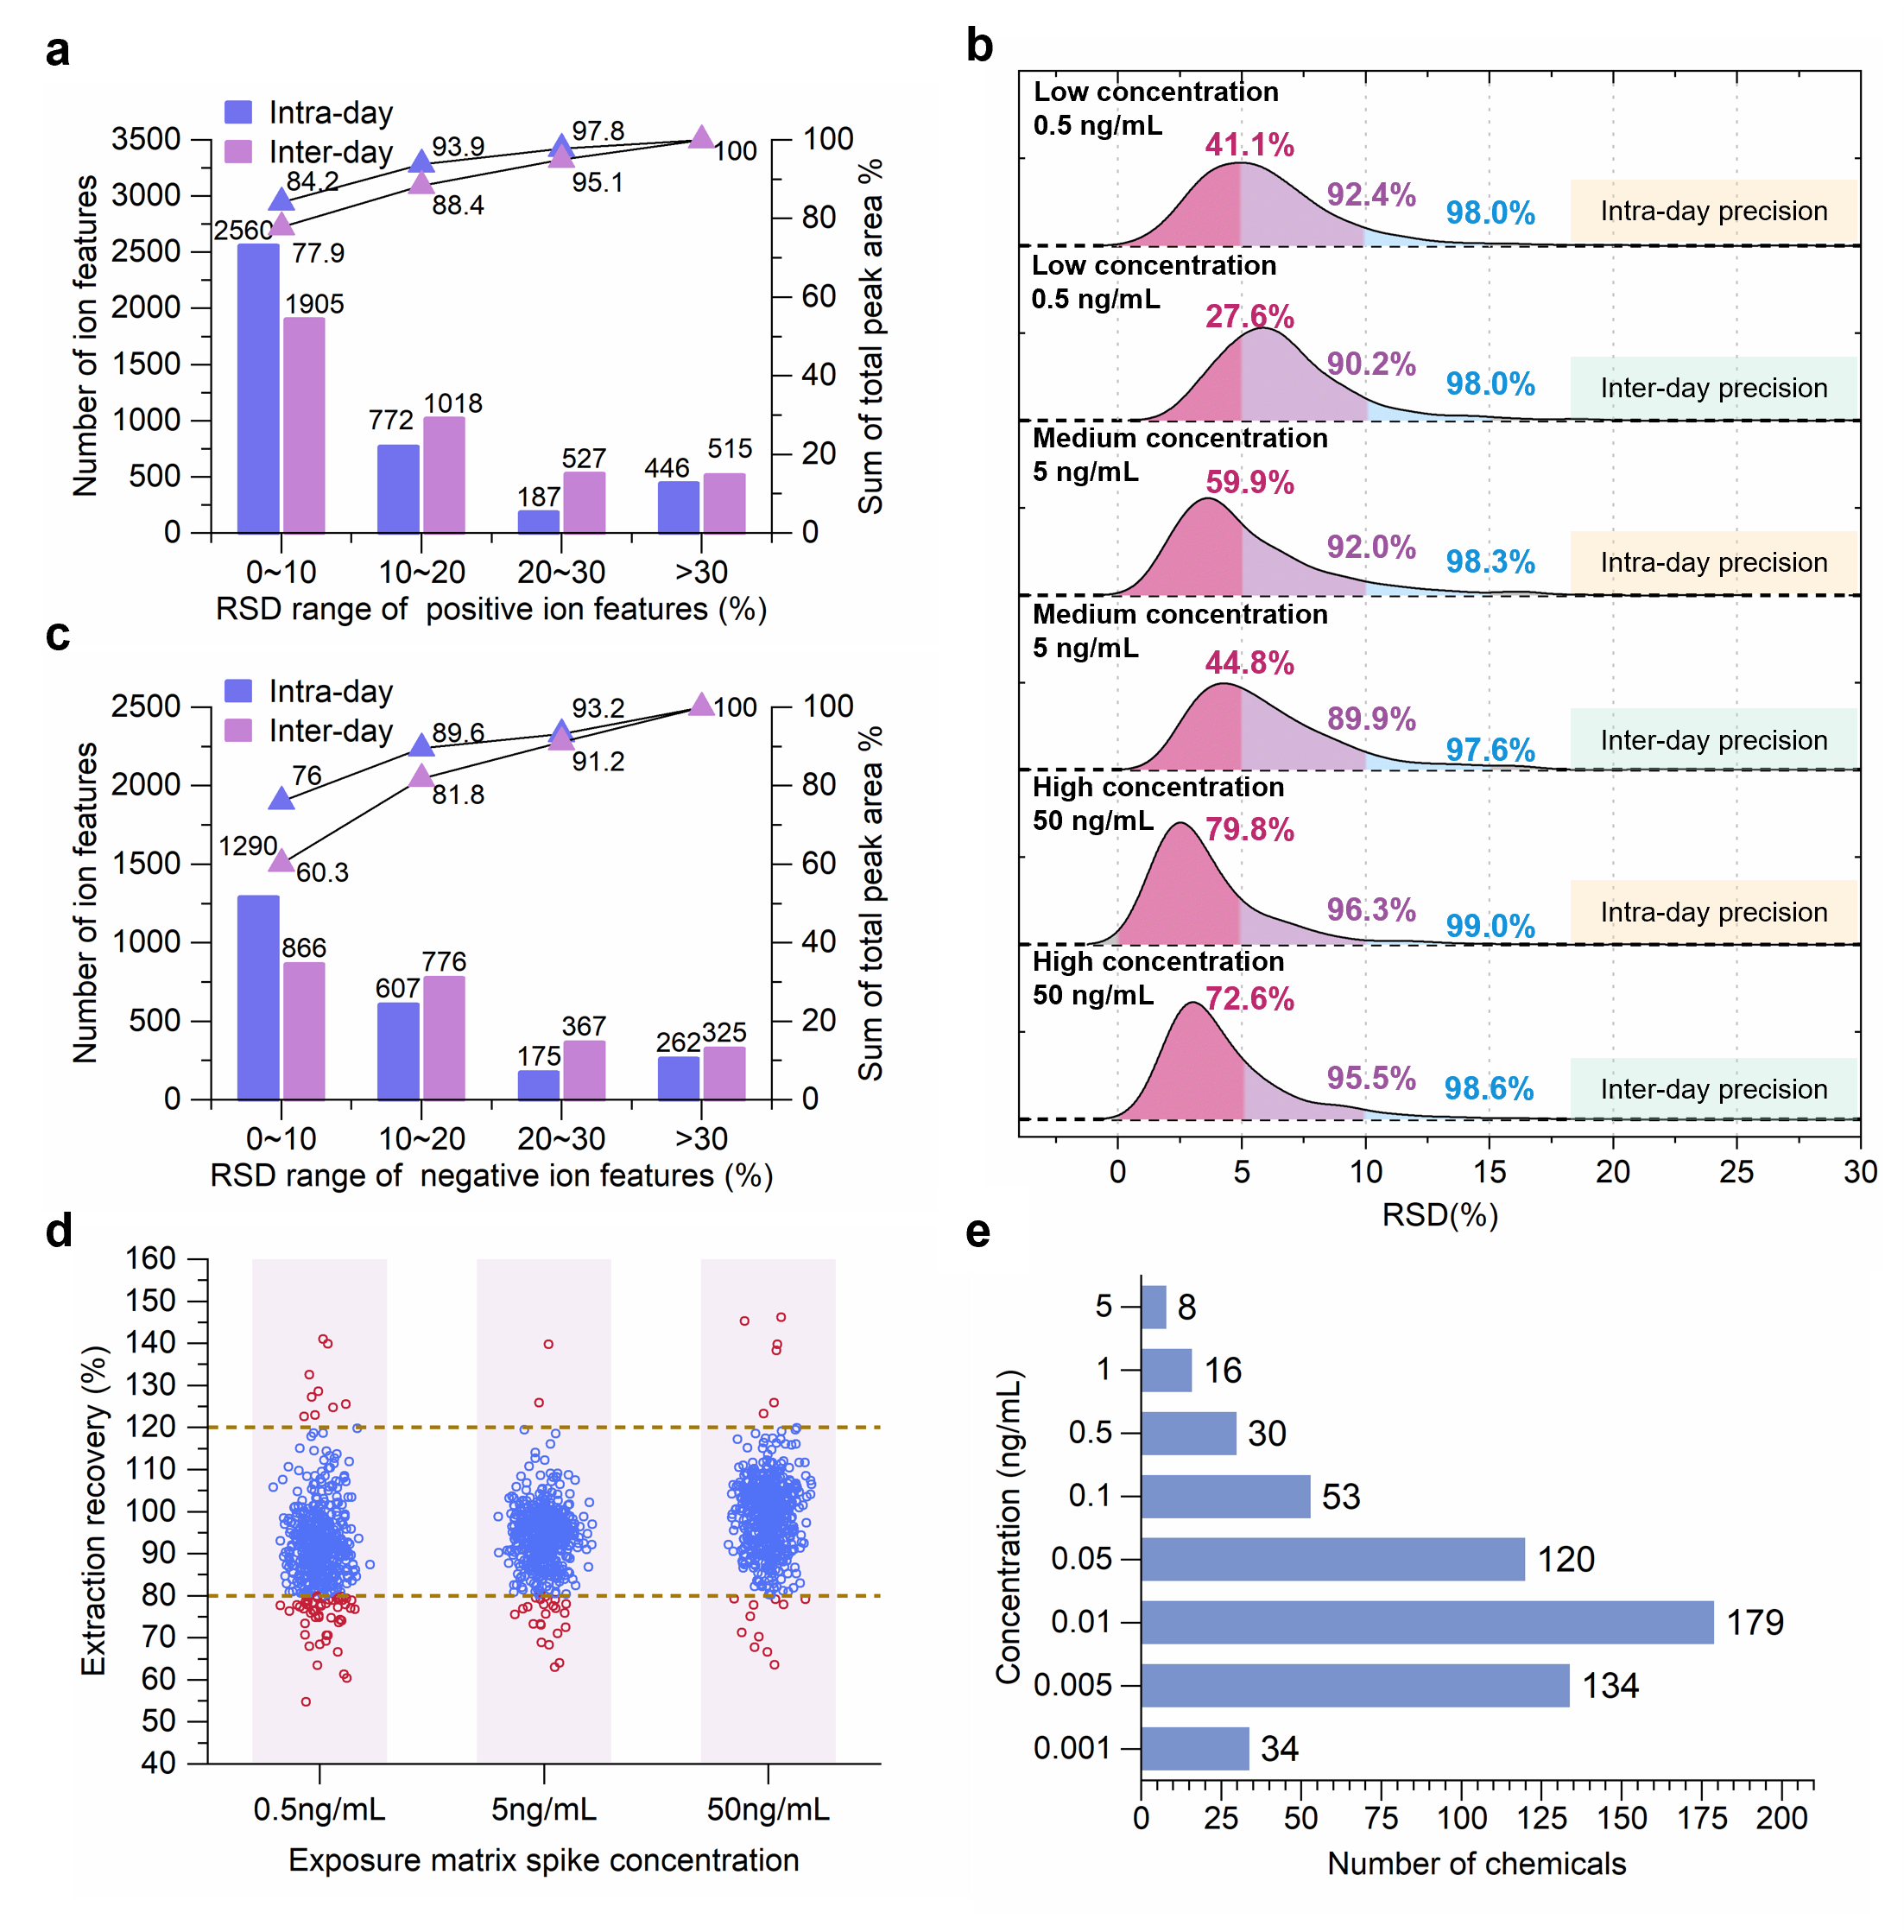


Supplementary Figure 4. Method validation results of 2DLC-HR/TQMS method. **a** Precision of compounds in serum QC in positive ion mode based on HRMS. **b** Precision of chemical exposures based on TQMS. **c** Precision of compounds in serum QC in negative ion mode based on HRMS. **d** Extraction recovery of chemical exposures based on TQMS. **e** Limit of detection of chemical exposures based on TQMS.


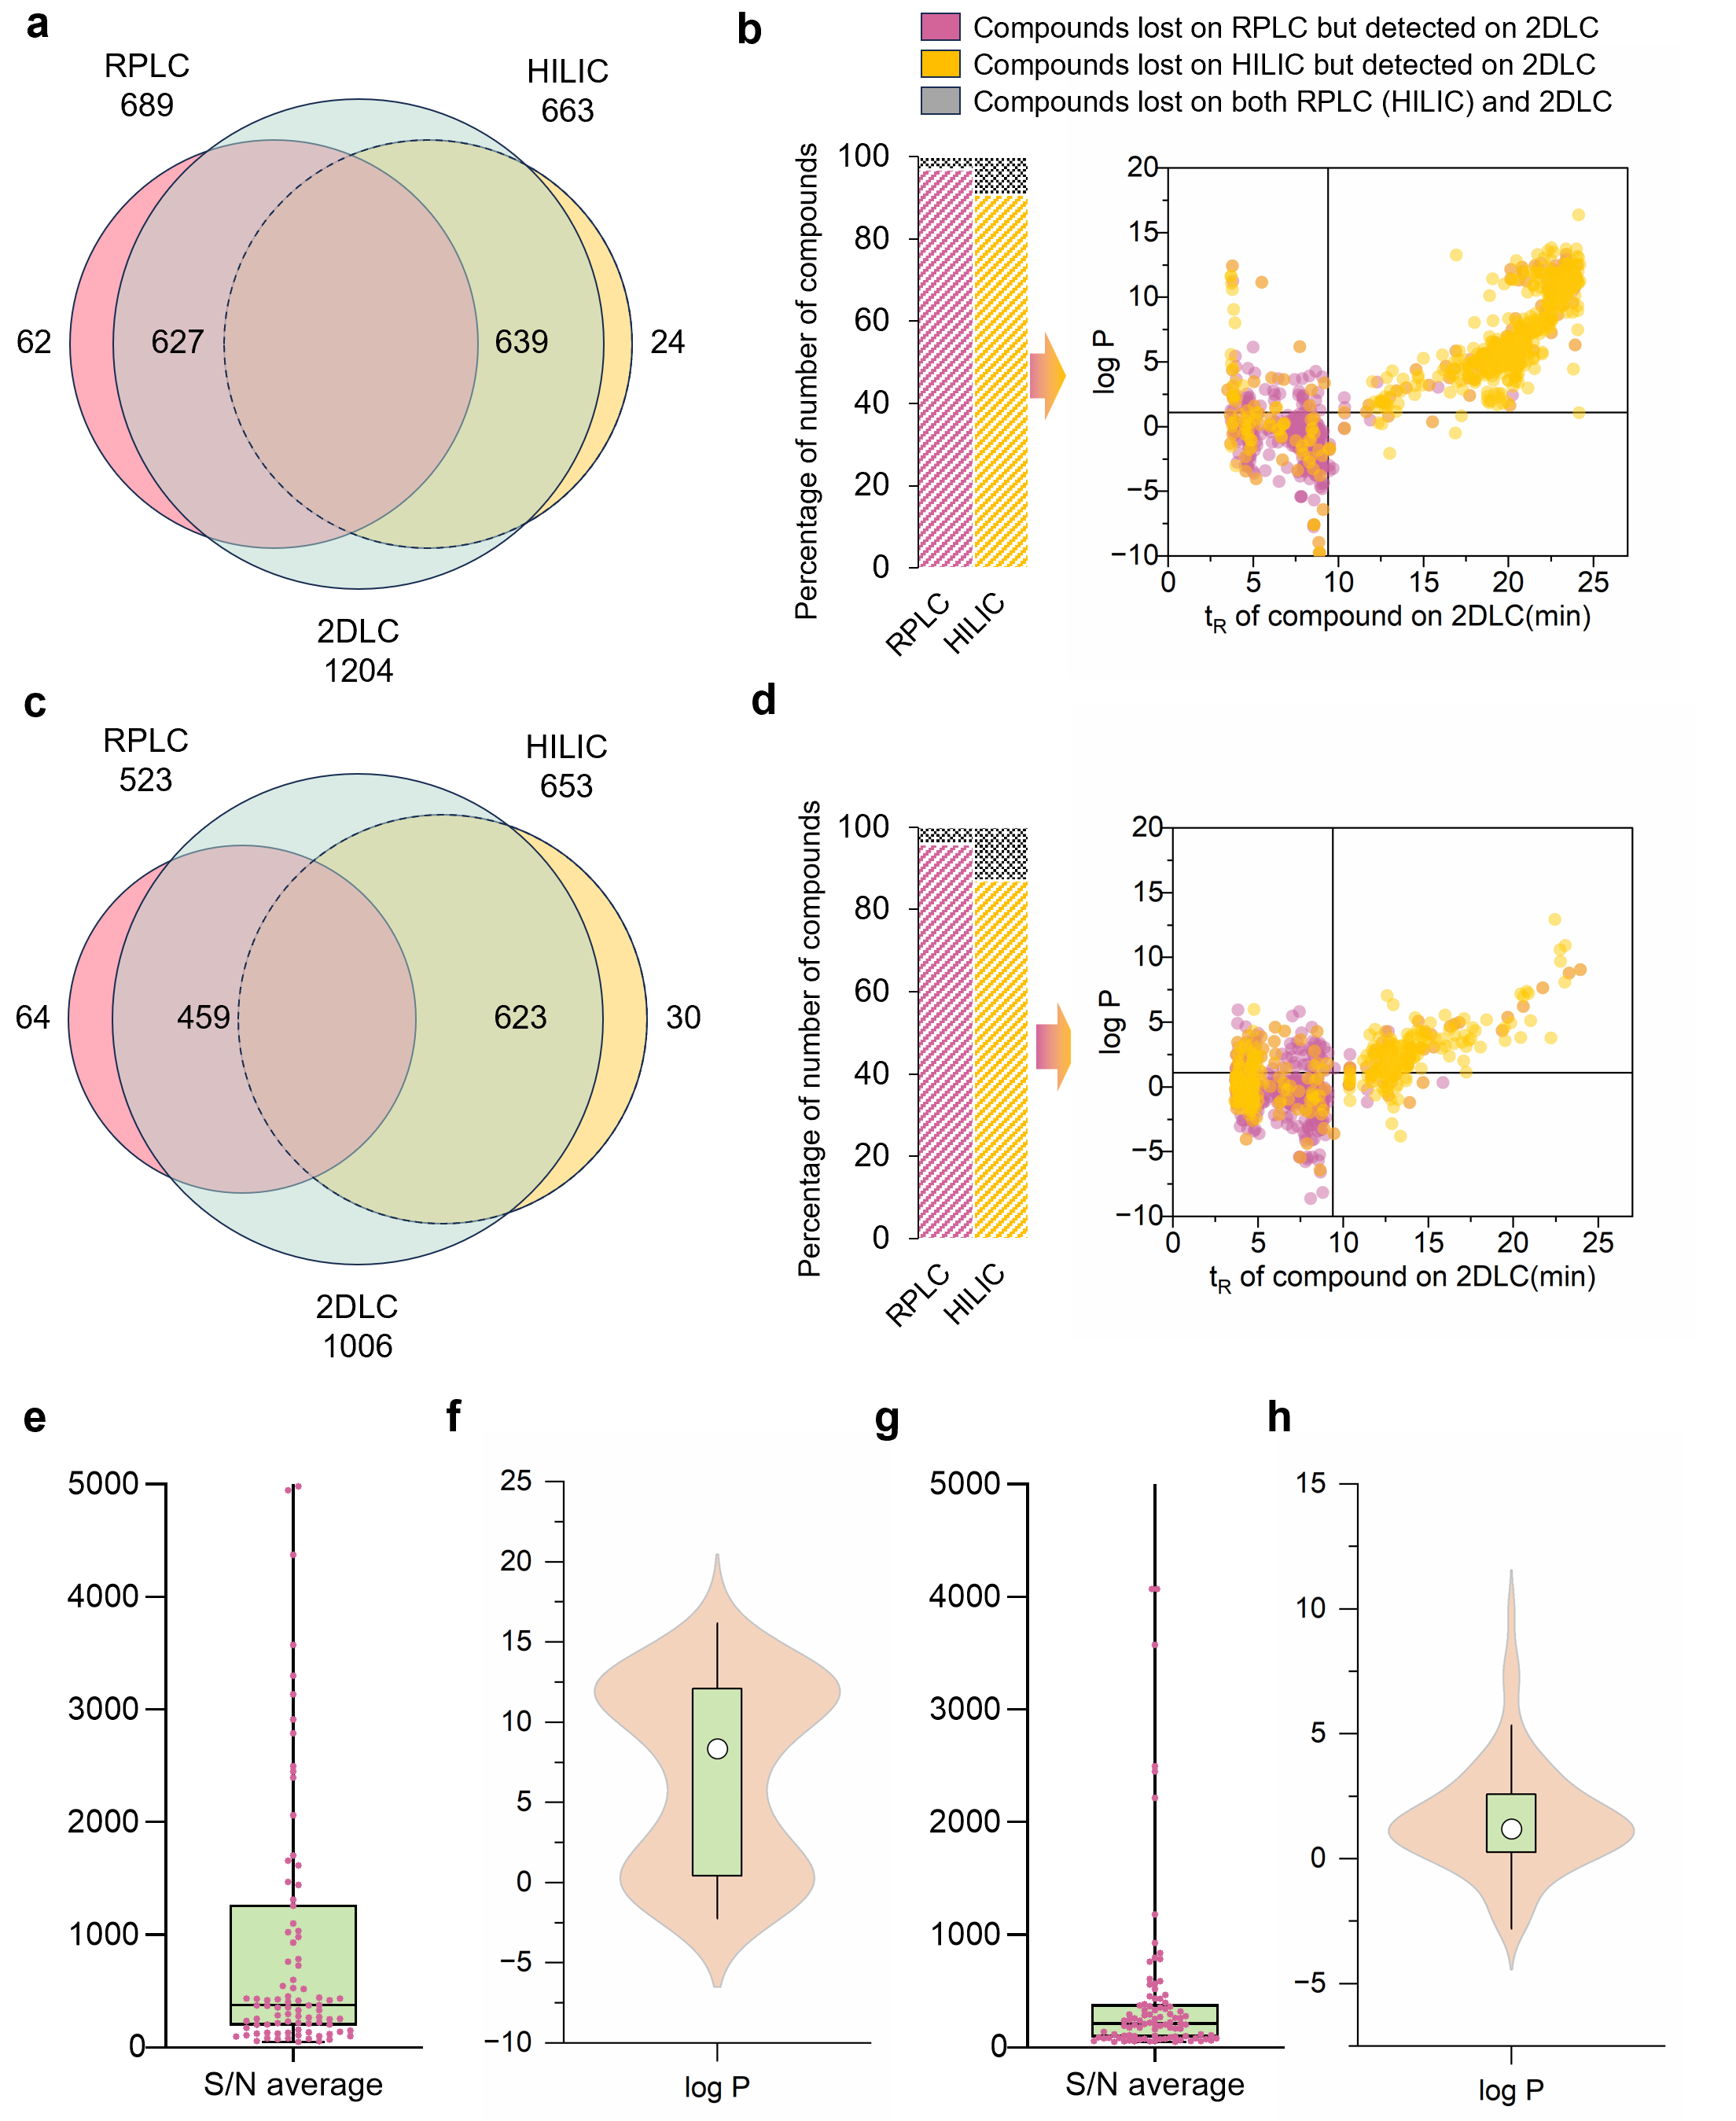


Supplementary Figure 5. Comparison of the numbers of compounds annotated from tissue and urine on three LC systems (2DLC, RPLC and HILIC) . **a** Venn diagram of the compounds annotated in tissue on three LC systems. **b** Retention time and log P distribution of the compounds lost on 1DLC but detected on 2DLC in tissue. **c** Venn diagram of the compounds annotated in urine on three LC systems. **d** Retention time and log P distribution of the compounds lost on 1DLC but detected on 2DLC in urine. **e** Box plot of S/N average of the compounds lost on 2DLC system in tissue. **f** Violin plot of log P distribution of the compounds lost on 2DLC system in tissue. **g** Box plot of S/N average of the compounds lost on 2DLC system in urine. (H) Violin plot of log P distribution of the compounds lost on 2DLC system in urine.


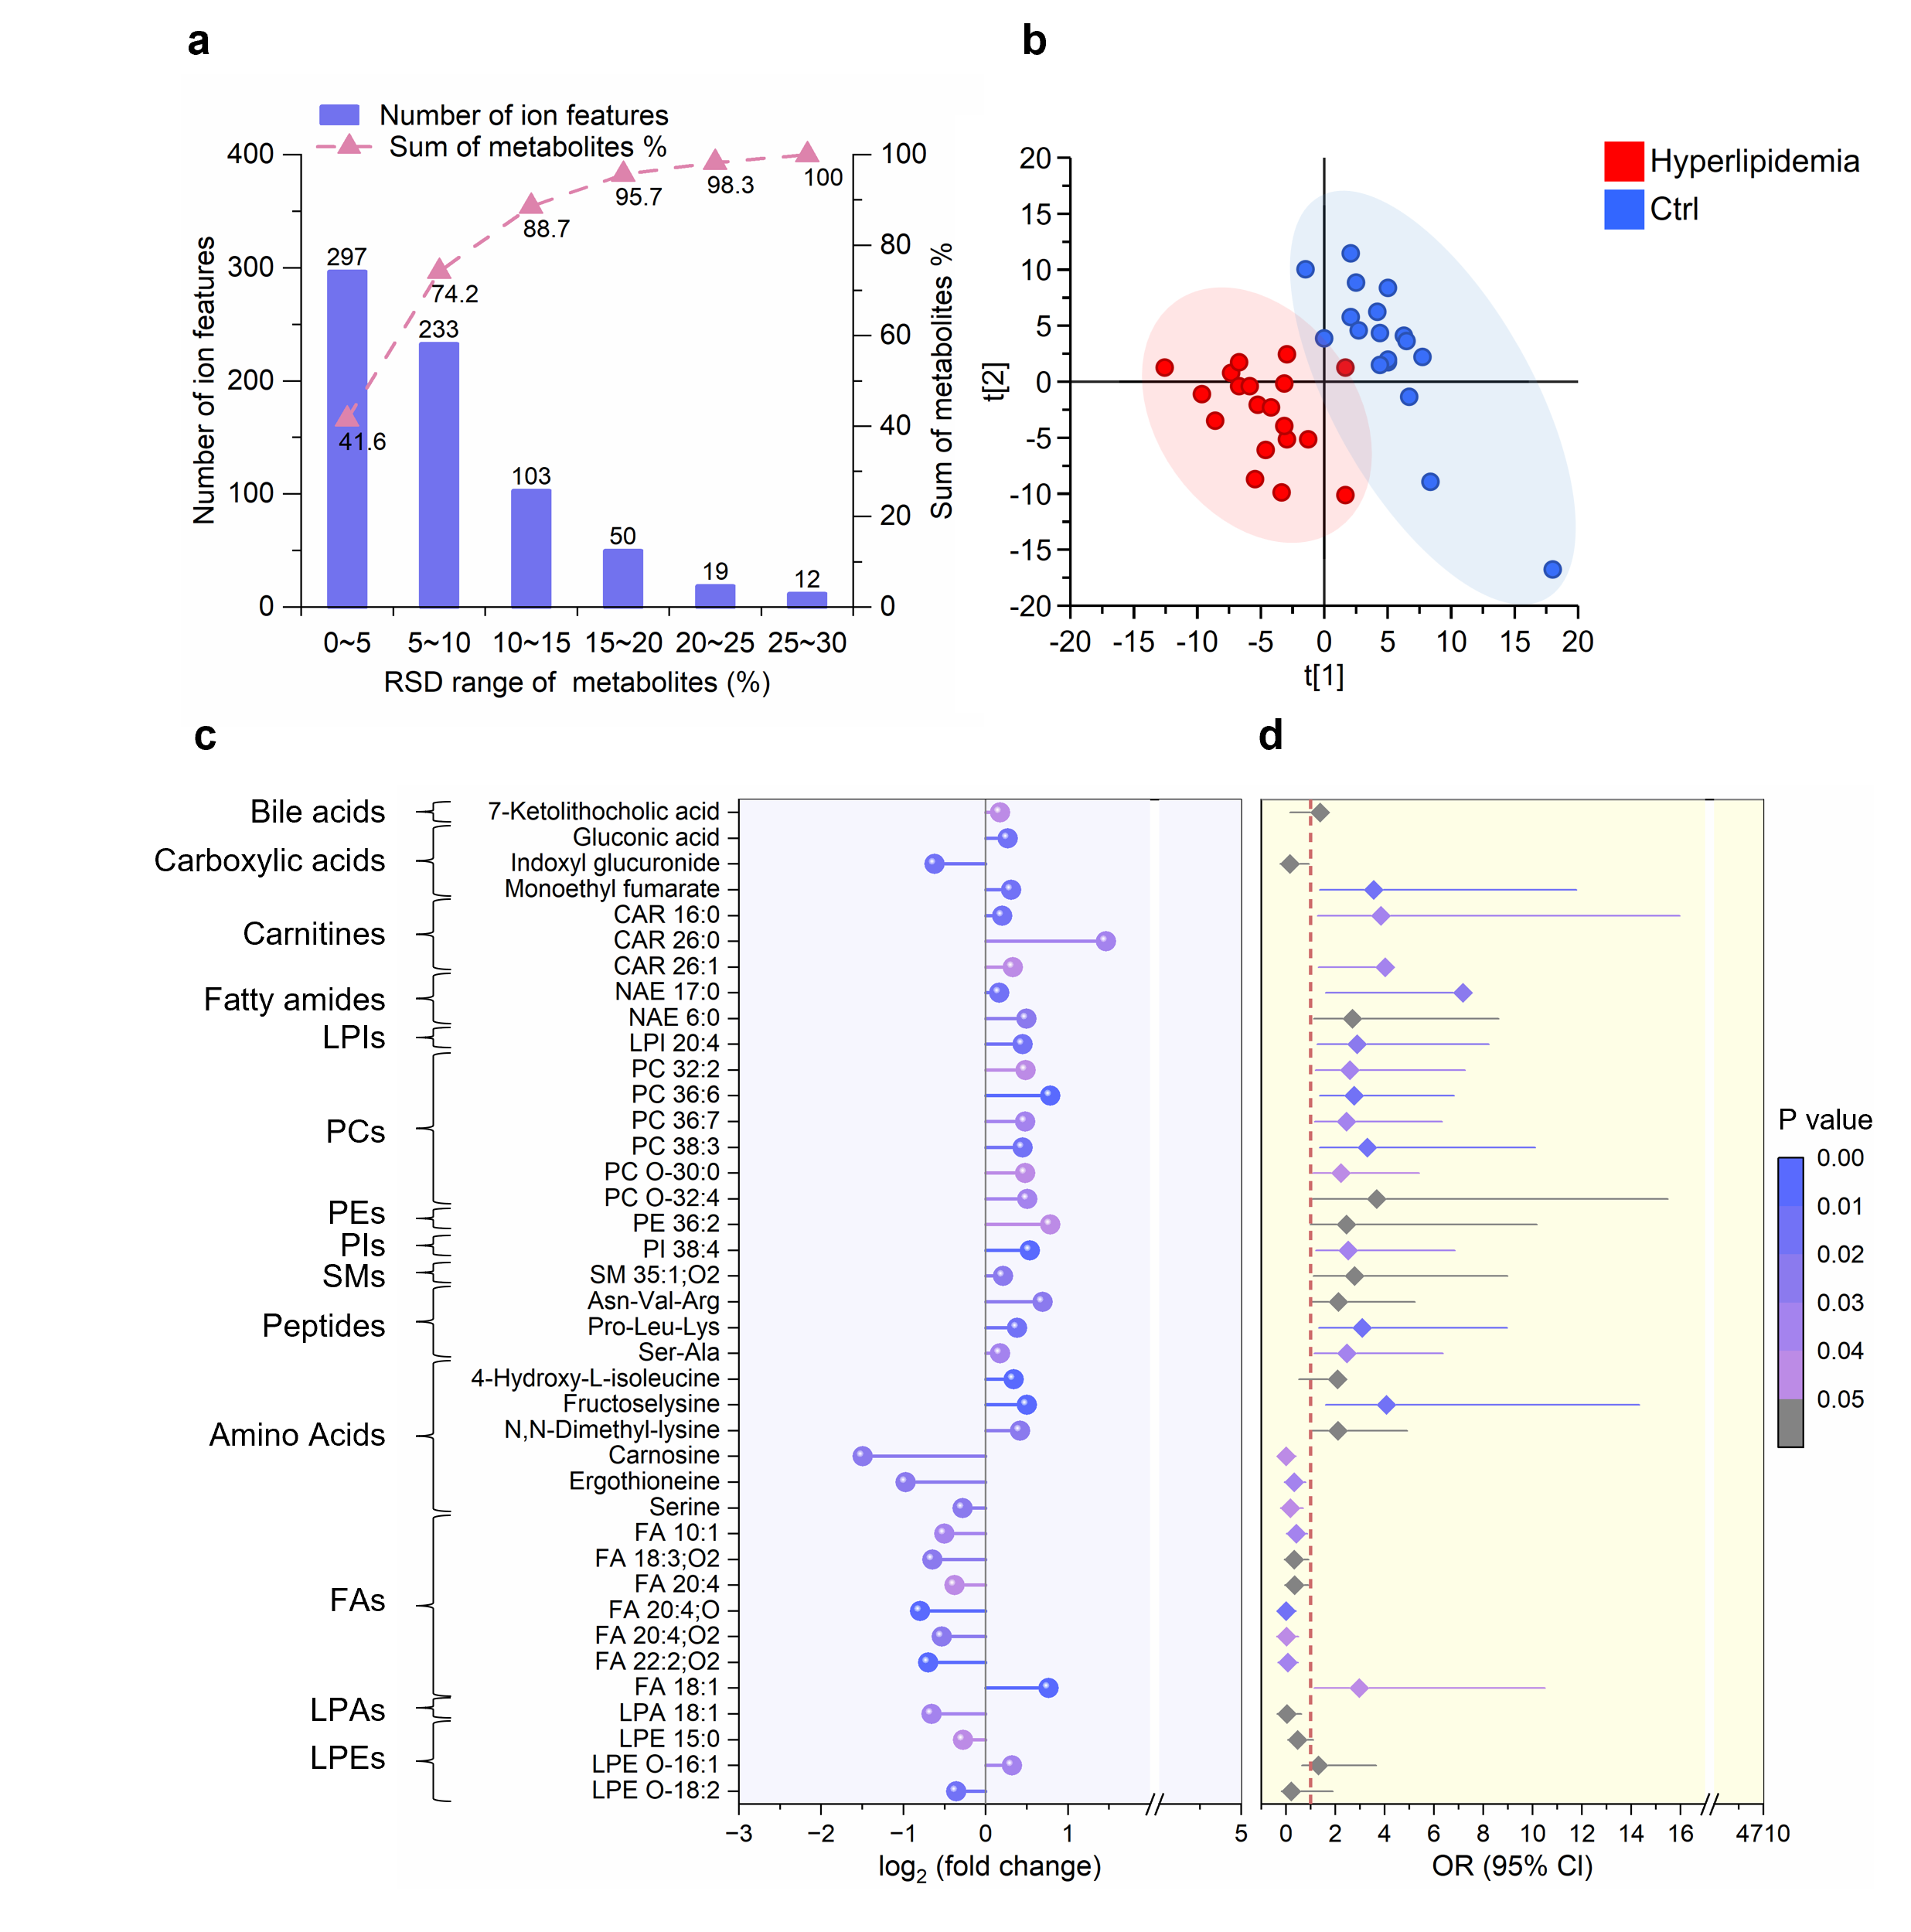


Supplementary Figure 6. Metabolome profiling of hyperlipidemia samples. **a** Relative standard deviation (RSD) distribution plot of each annotated metabolite from quality control samples by 2DLC-HRMS platform. **b** PLS-DA score plot of control and hyperlipidemia groups. **c** Significant different metabolites of hyperlipidemia and fold change of their concentration between control and hyperlipidemia. **d** Significant different metabolites of hyperlipidemia and their odd ratio. The color of diamond represent the significant of OR (two-sided).


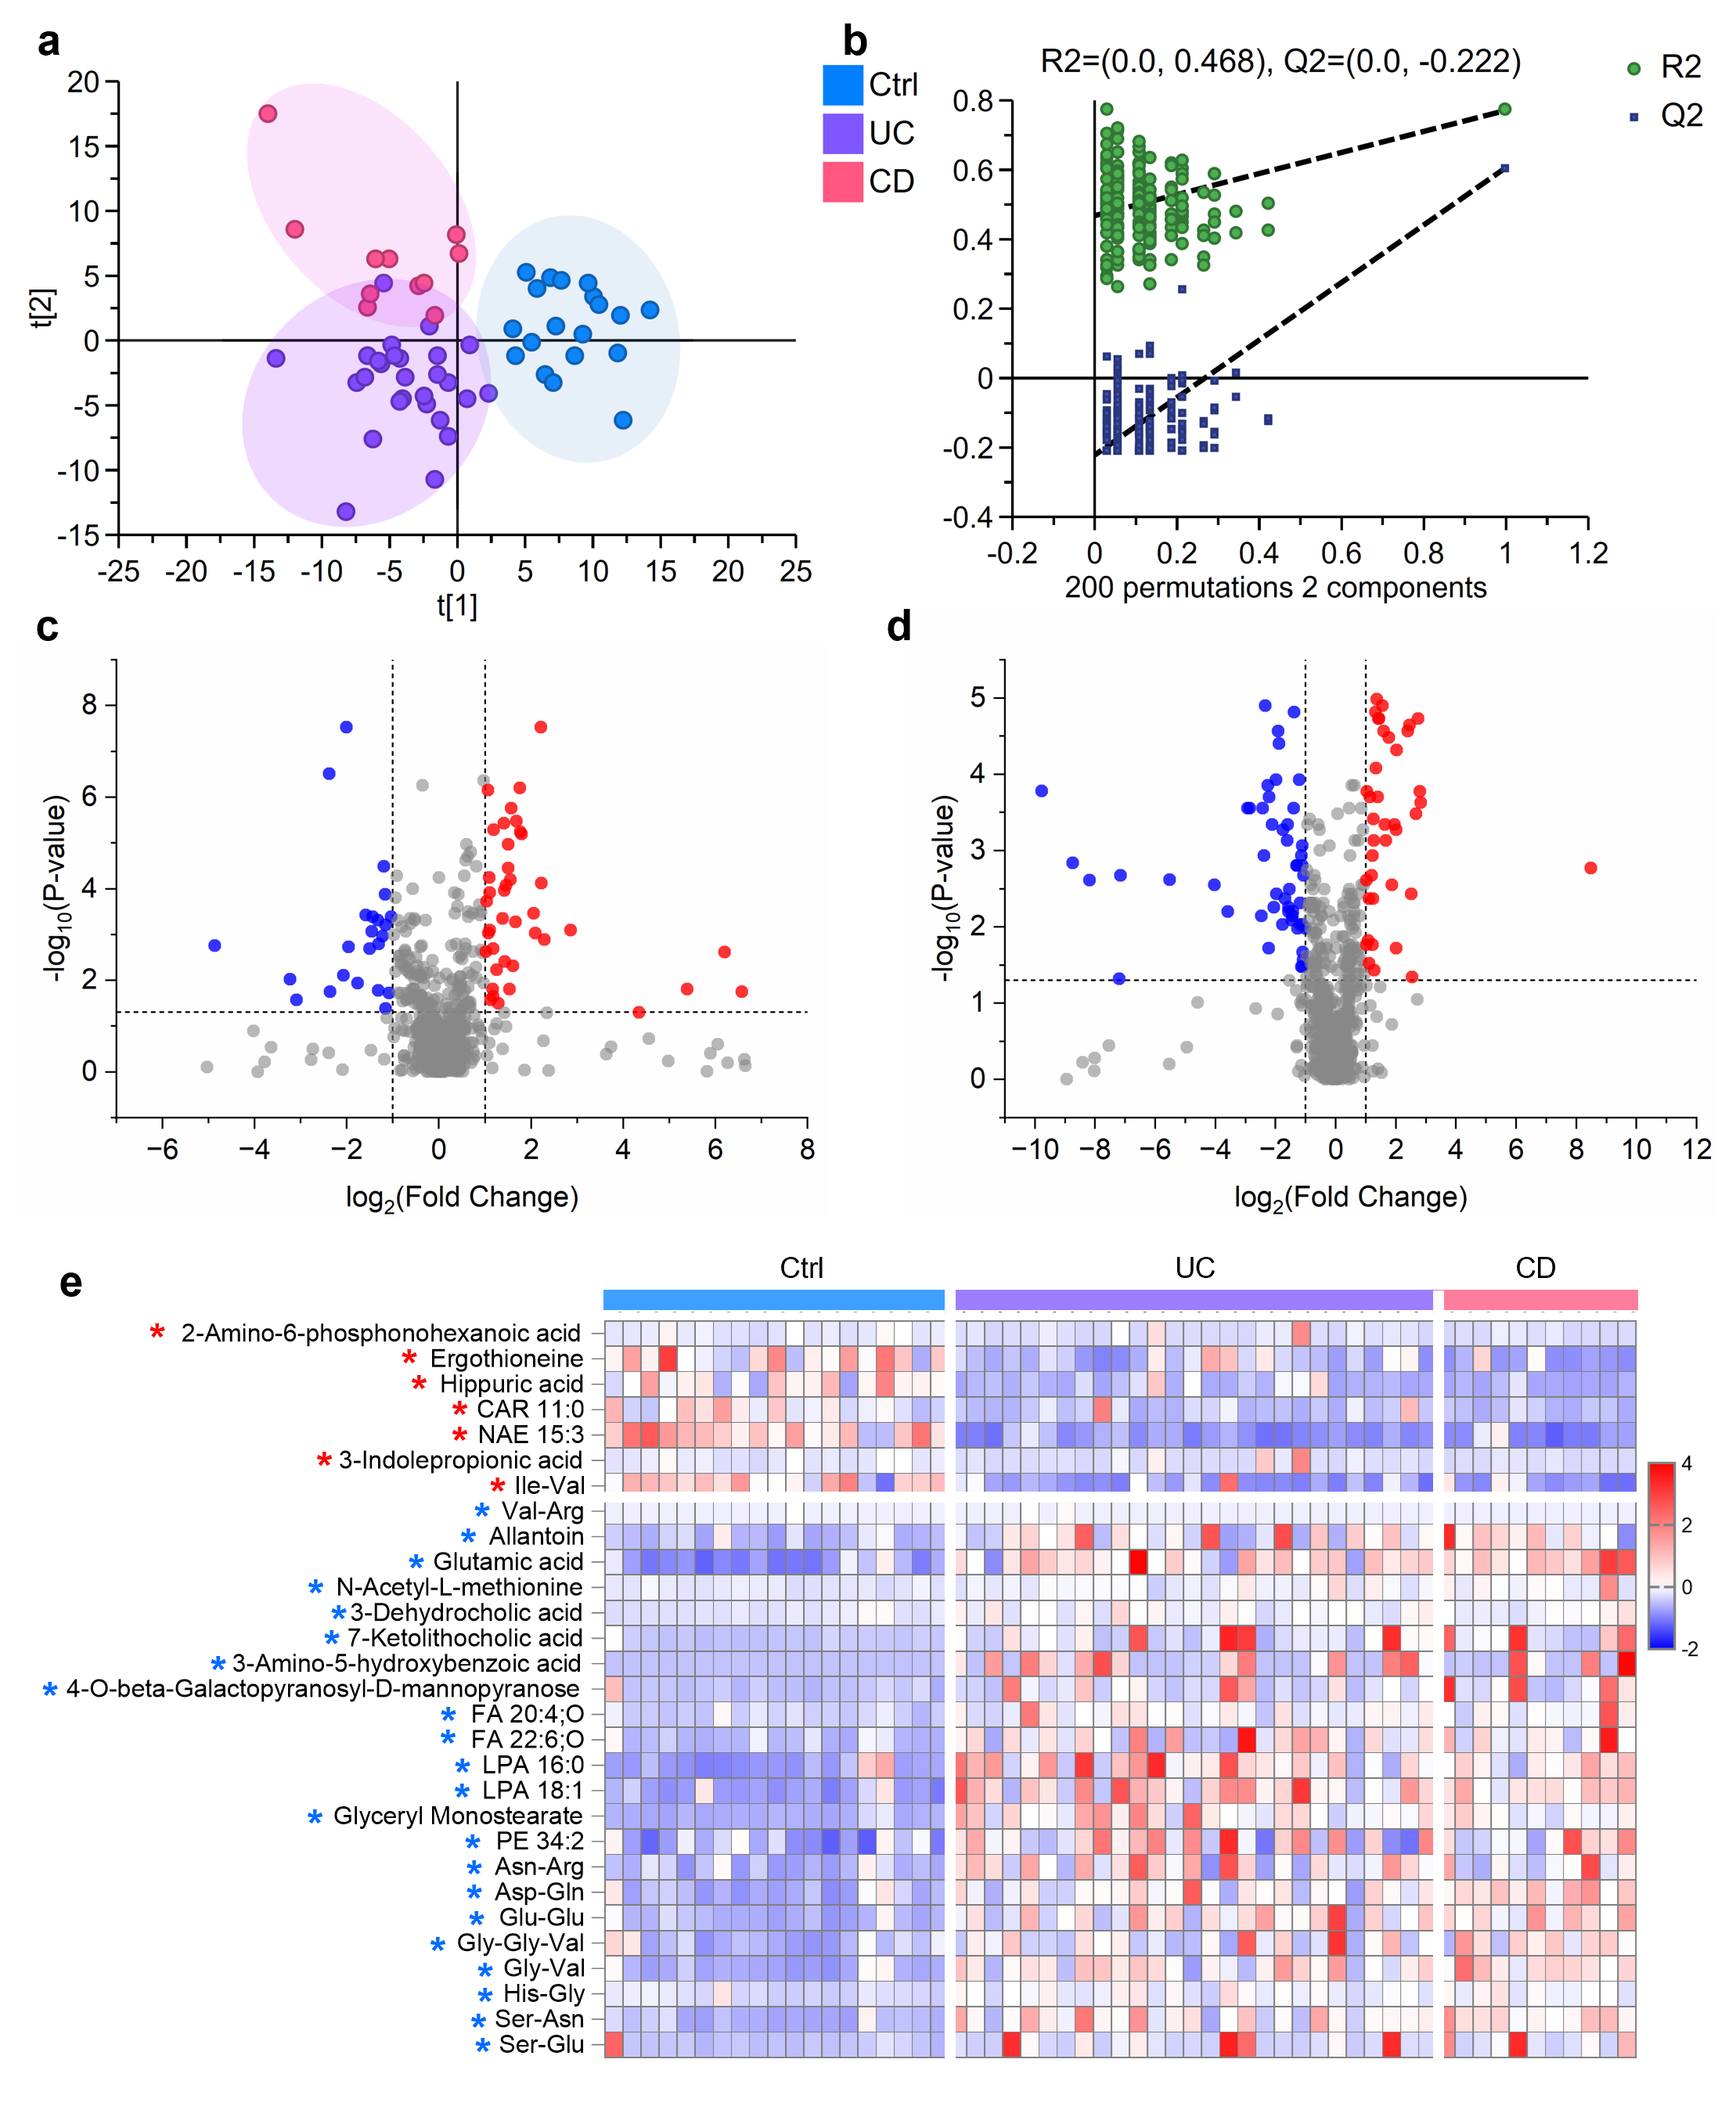


Supplementary Figure 7. Metabolome profiling of UC and CD samples. **a** PCA score plot of Ctrl, UC and CD groups. **b** Permutations plot for PCA model of Ctrl, UC and CD groups. **c** Volcano Plot of different metabolites between Ctrl and UC. (D) Volcano Plot of different metabolites between Ctrl and CD. **d** Heatmap of same differential metabolites of Ctrl vs. UC and Ctrl vs. CD. * Represents metabolite was significantly associated with at least one chemical exposure, red indicates positive correlations and blue indicates negative correlations.


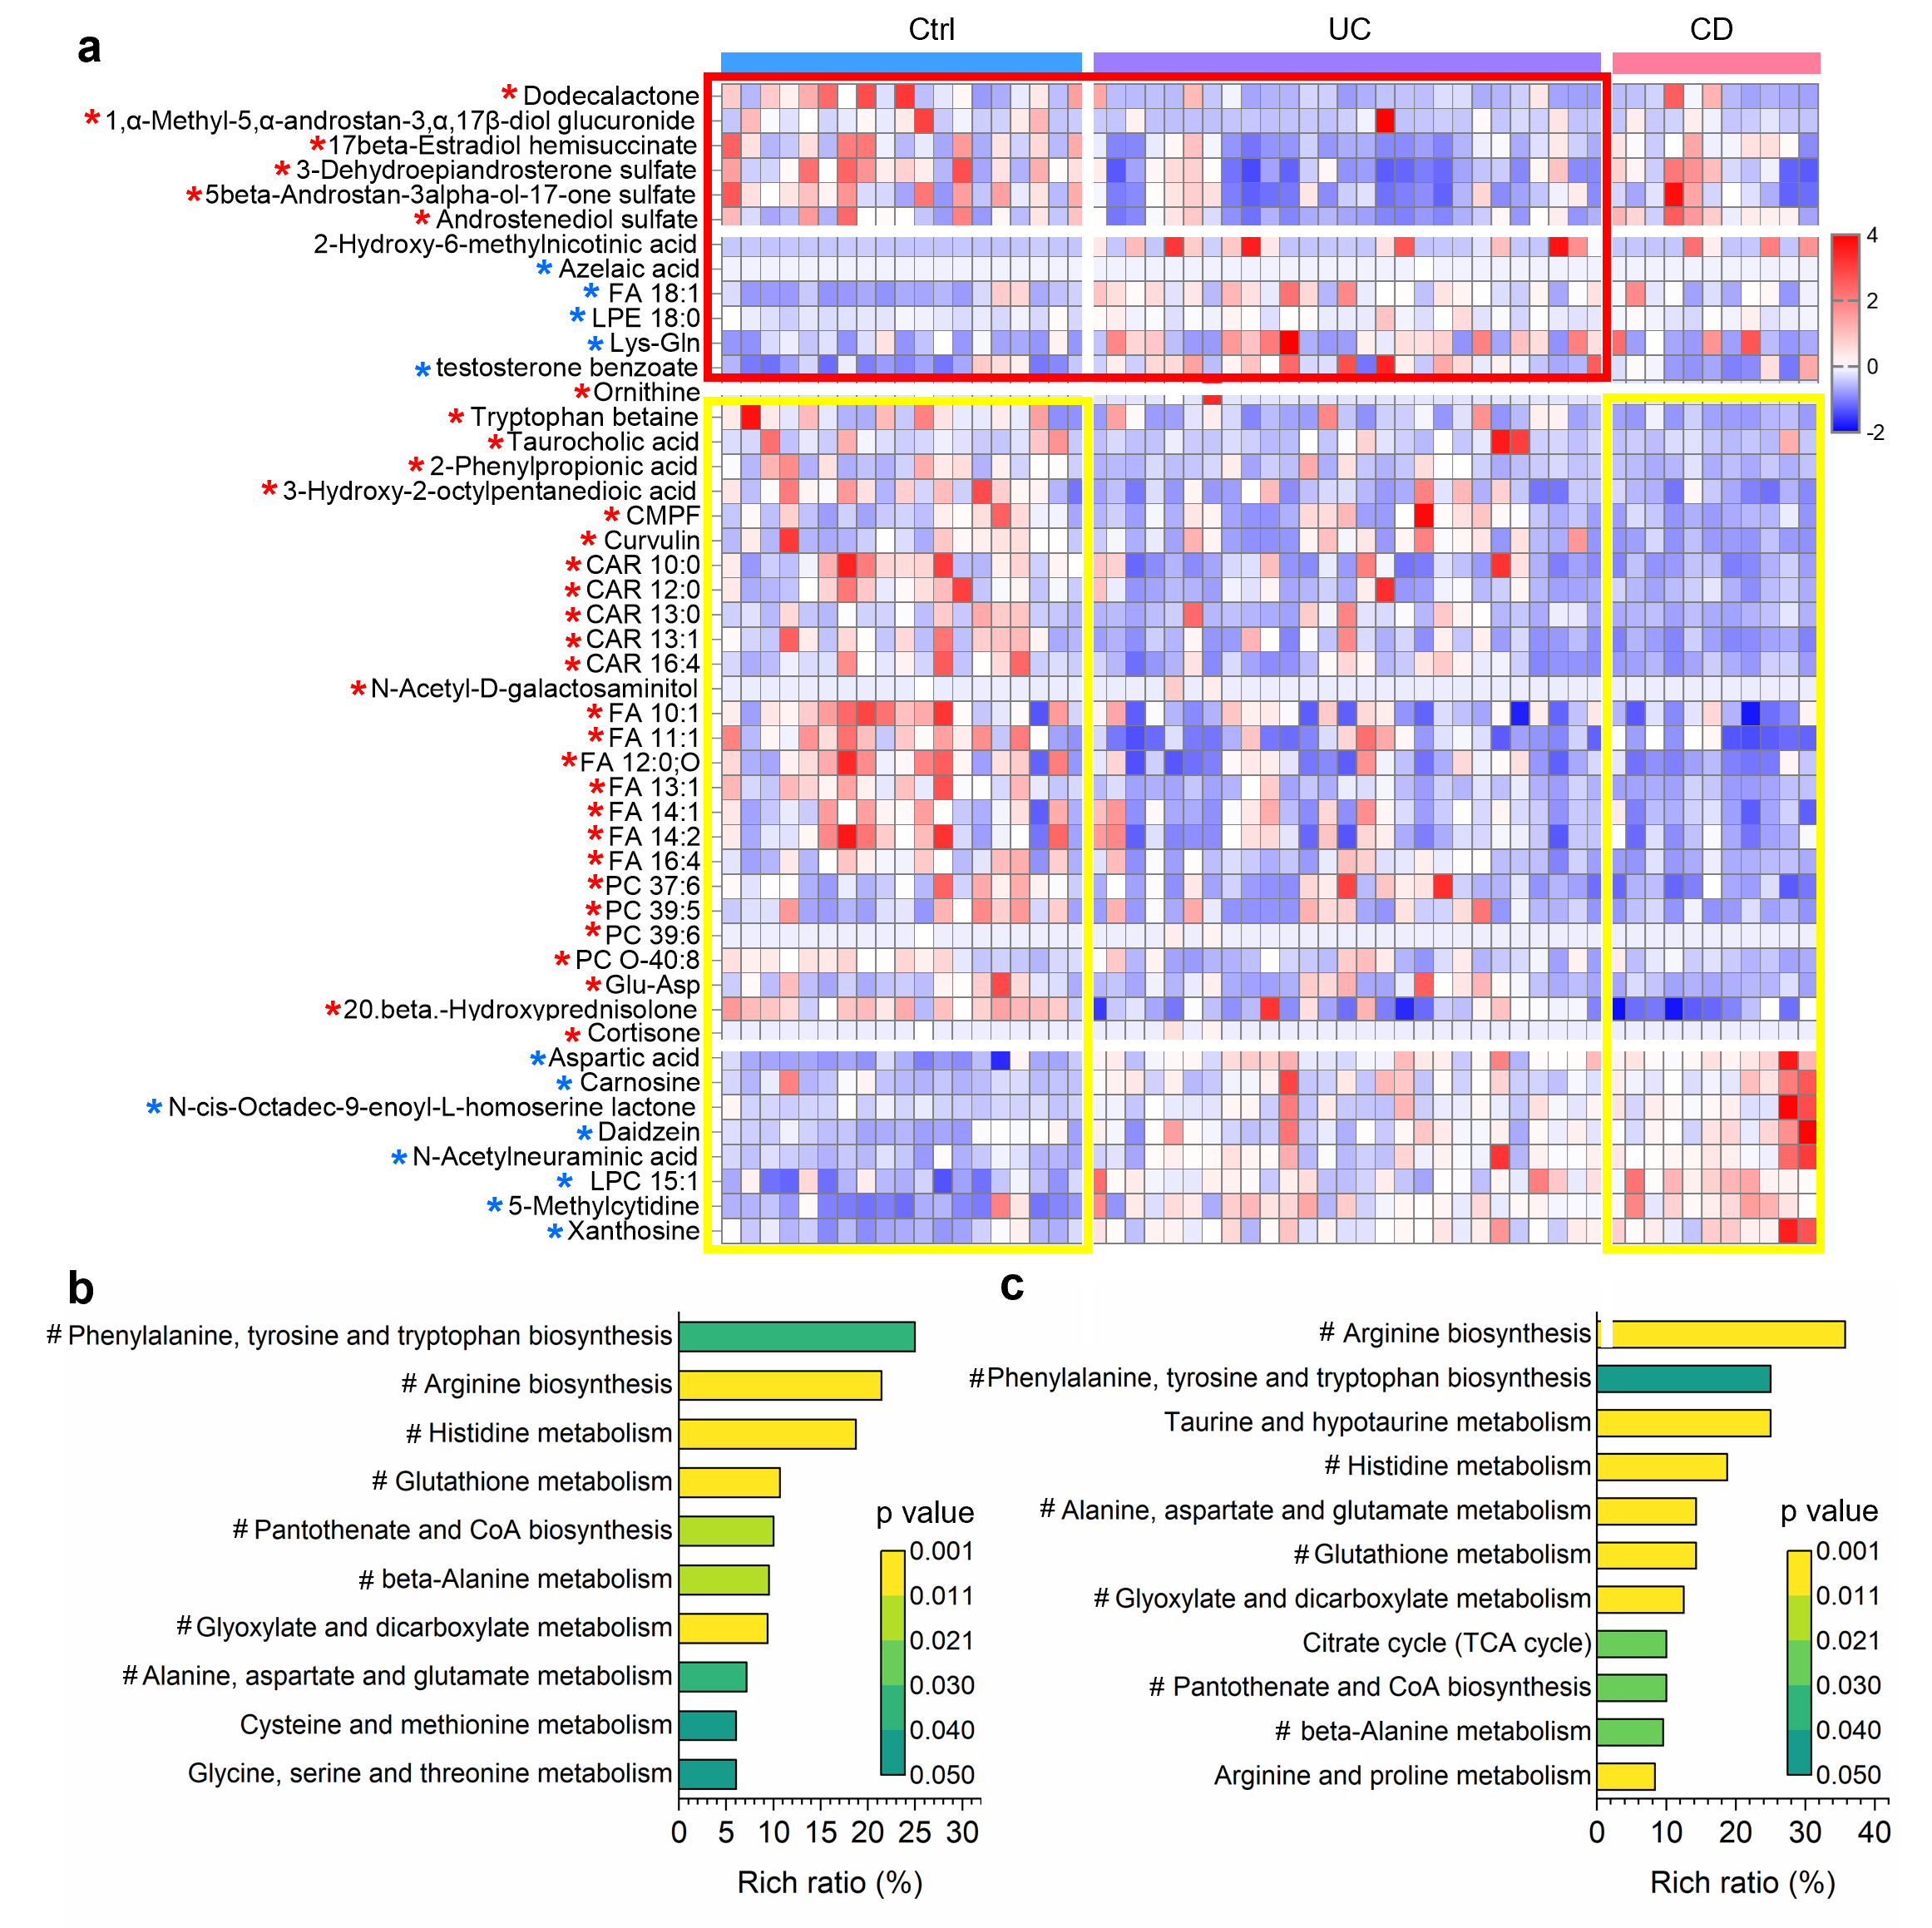


Supplementary Figure 8. Unique metabolome profiling of UC and CD samples. **a** Heatmap of unique differential metabolites of Ctrl vs. UC and Ctrl vs. CD. * Represents metabolite was significantly associated with at least one chemical exposure, red indicates positive correlations and blue indicates negative correlations. **b** Pathway enrichment analysis of Ctrl vs. UC by using different metabolites with p value and FDR less than 0.05. **c** Pathway enrichment analysis of Ctrl vs. CD by using different metabolites with p value and FDR less than 0.05. # represents the same metabolome pathways altered in UC and CD.


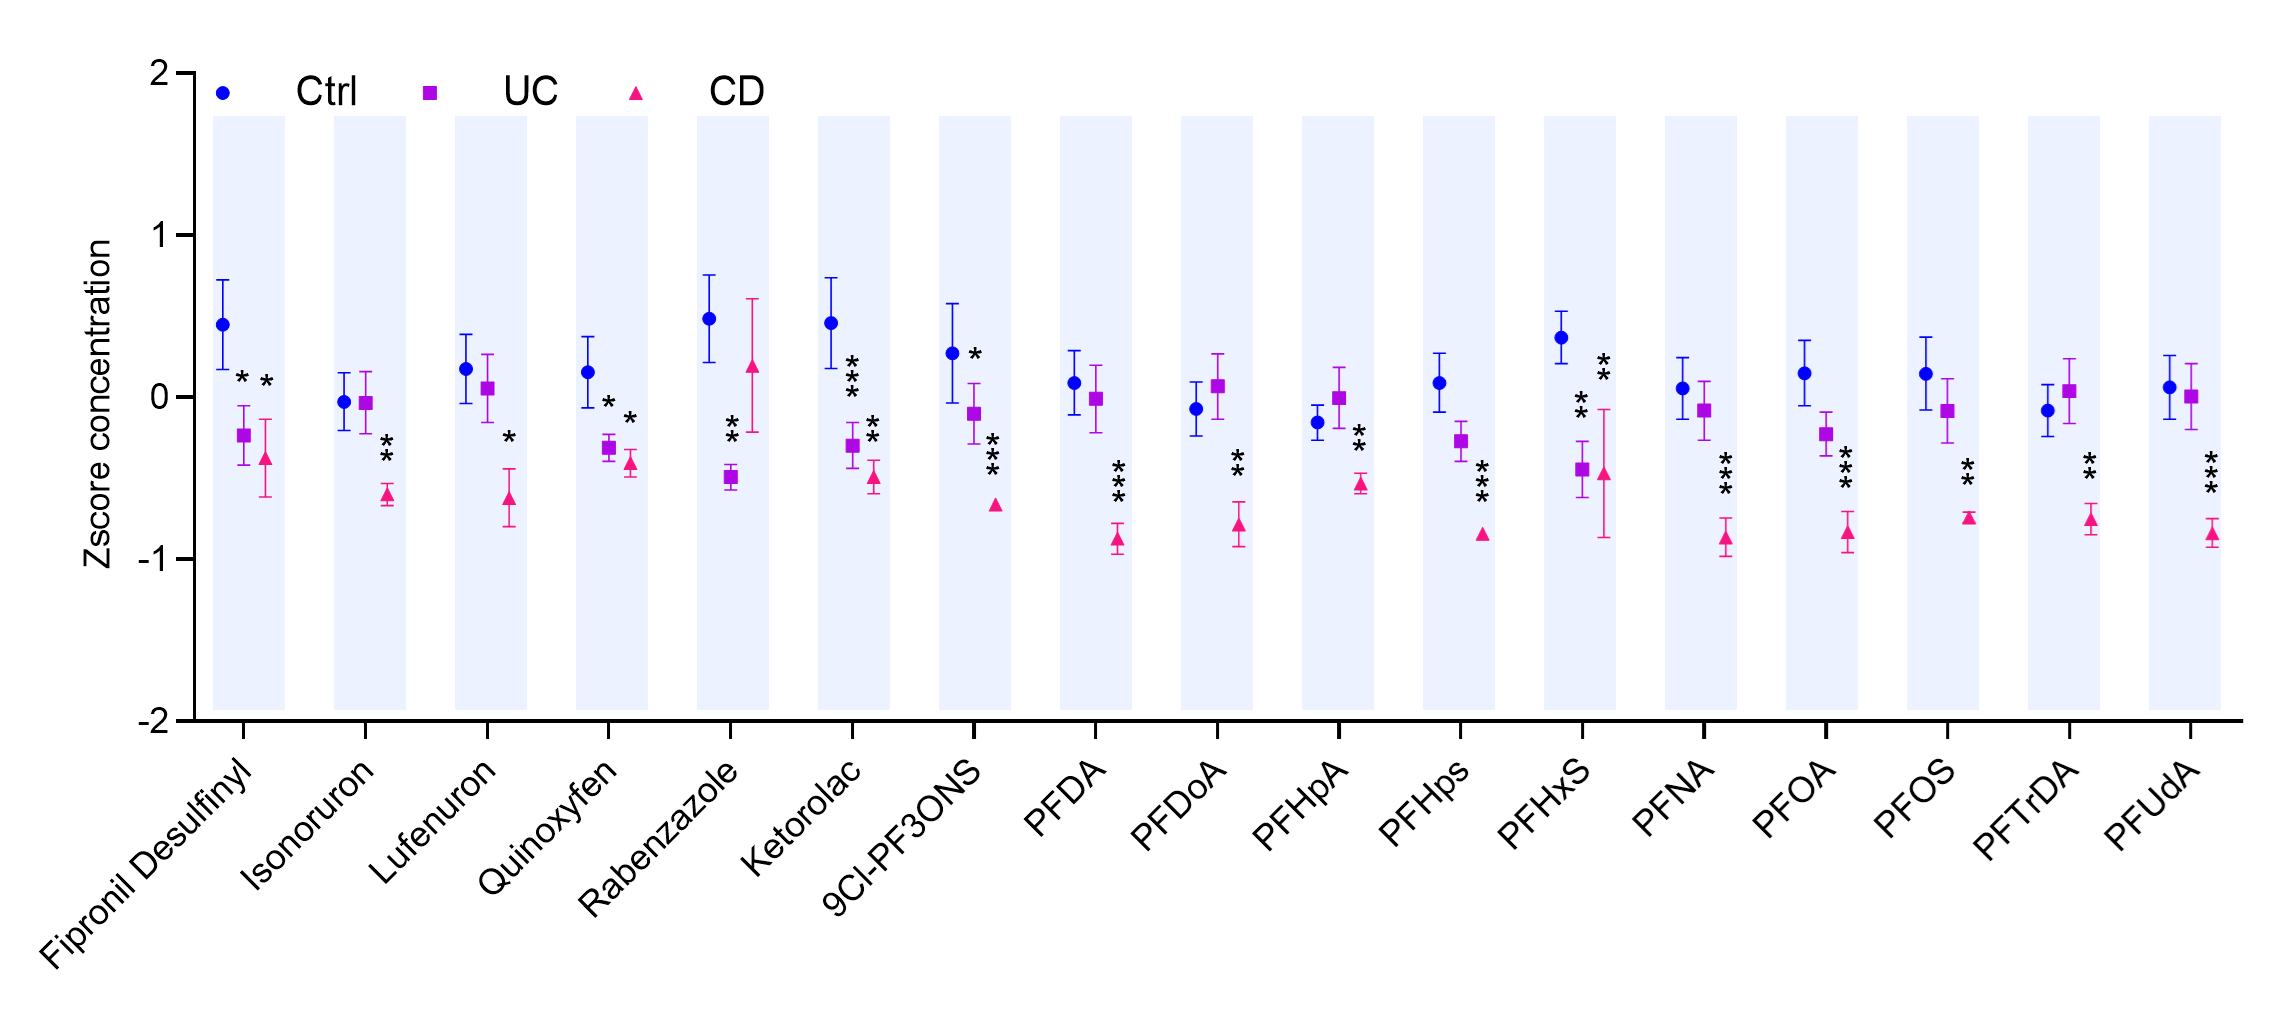


Supplementary Figure 9. Concentration levels of serum chemical exposures in Ctrl, UC and CD groups. Error bars present standard error of mean. * Represents p < 0.05, ** represents p < 0.01, *** represents p < 0.001(two-sided).

Supplementary Table

Supplementary Table 1. Basic sample information of the chronic disease cohort.

| **Characteristics** | **Total Samples** | **Controls** | **Hyper-lipidemia** | **Ulcerative Colitis** | **Crohn's disease** |
| --- | --- | --- | --- | --- | --- |
| **Gender** (male/female) | 43/36 | 10/9 | 9/9 | 12/15 | 8/3 |
| **Age** (years) | 49.9±15.22 | 44.0±15.86 | 56.78±11.83 | 54.9±13.18 | 39.6±12.96 |
| **BMI** | 22.64±3.31 | 21.49±1.61 | 24.35±3.11 | 22.83±4.03 | 21.40±3.15 |
| **Total cholesterol** (mmol/L) | 4.81±1.17 | 4.59±0.54 | 5.87±1.3 | 4.46±0.99 | 3.96±0.88 |
| **Triglyceride** (mmol/L) | 1.03±0.57 | 0.82±0.29 | 1.47±0.56 | 1.15±0.6 | 1.06±0.67 |
| a **LDL-C** (mmol/L) | 2.61±0.82 | 2.31±0.38 | 3.31±0.93 | 2.48±0.74 | 2.17±0.62 |
| **Total Bile Acid (µmol/L)** | 4.54±2.13 | 2.07±1.03 | 1.88±0.77 | 3.17±2.83 | 3.01±2.15 |

a LDL-C, low density lipoprotein cholesterol.

**References**

1. Lv W*, et al.* Alternate reversed-phase and hydrophilic interaction liquid chromatography coupled with mass spectrometry for broad coverage in metabolomics analysis. *J Chromatogr B* **1152**, (2020).

2. Zheng S*, et al.* Strategy for Comprehensive Detection and Annotation of Gut Microbiota-Related Metabolites Based on Liquid Chromatography–High-Resolution Mass Spectrometry. *Anal Chem* **96**, 2206-2216 (2024).

3. Ananthakrishnan AN*, et al.* Challenges in IBD Research 2024: Environmental Triggers. *Inflamm Bowel Dis* **30**, S19-S29 (2024).

4. Podolsky DK. Inflammatory bowel disease. *N Engl J Med* **347**, 417-429 (2002).

5. Xavier RJ, Podolsky DK. Unravelling the pathogenesis of inflammatory bowel disease. *Nature* **448**, 427-434 (2007).

6. Nishida A, Inoue R, Inatomi O, Bamba S, Naito Y, Andoh A. Gut microbiota in the pathogenesis of inflammatory bowel disease. *Clin J Gastroenterol* **11**, 1-10 (2017).

7. Gallagher K, Catesson A, Griffin JL, Holmes E, Williams HRT. Metabolomic Analysis in Inflammatory Bowel Disease: A Systematic Review. *J Crohns Colitis* **15**, 813-826 (2021).

8. Dorrington AM, Selinger CP, Parkes GC, Smith M, Pollok RC, Raine T. The Historical Role and Contemporary Use of Corticosteroids in Inflammatory Bowel Disease. *J Crohns Colitis* **14**, 1316-1329 (2020).

9. Nunes T, Barreiro-de Acosta M, Marin-Jiménez I, Nos P, Sans M. Oral locally active steroids in inflammatory bowel disease. *J Crohns Colitis* **7**, 183-191 (2013).

10. Scoville EA*, et al.* Alterations in lipid, amino acid, and energy metabolism distinguish Crohn’s disease from ulcerative colitis and control subjects by serum metabolomic profiling. *Metabolomics* **14**, (2017).

11. Lennie TA, McCarthy DO, Keesey RE. BODY ENERGY STATUS AND THE METABOLIC RESPONSE TO ACUTE-INFLAMMATION. *Am J Physiol Regul Integr Comp Physiol* **269**, R1024-R1031 (1995).

12. Lai Y*, et al.* Serum Metabolomics Identifies Altered Bioenergetics, Signaling Cascades in Parallel with Exposome Markers in Crohn’s Disease. *Molecules* **24**, (2019).

13. Sun J*, et al.* Anti-inflammatory properties and gut microbiota modulation of an alkali-soluble polysaccharide from purple sweet potato in DSS-induced colitis mice. *Int J Biol Macromol* **153**, 708-722 (2020).

14. Zeng L*, et al.* An engineering probiotic producing defensin-5 ameliorating dextran sodium sulfate-induced mice colitis via Inhibiting NF-kB pathway. *J Transl Med* **18**, (2020).

15. Zhu Y, Yang X, Song X, Jia Y, Zhang Y, Zhu L. Insights into the Enhanced Bioavailability of Per- and Polyfluoroalkyl Substances in Food Caused by Chronic Inflammatory Bowel Disease. *Environ Sci Technol* **58**, 11912-11922 (2024).
